# Supplementary material for: Genome-Wide Comprehensive Identification and In Silico Characterization of Lectin Receptor-Like Kinase Gene Family in Barley (Hordeum vulgare L.)
Source: Hindawi journal article supplement (doi:10.1155/2024/2924953), 2024-02-27
Supplement: f1 [file 2924953.f1.zip]

**Supplementary Table 1.** miRNA targeted prediction of *HvlecRLKs*. The miRNA data was downloaded from the plant micro-RNA encyclopedia (<http://pmiren.com/>).

| miRNA ID      | Target ID           | Target length | Target start | Target end | miRNA_aligned_fragment  |
|---------------|---------------------|---------------|--------------|------------|-------------------------|
| hvu-miR6204   | <i>HvleckRLK1</i>   | 22            | 29           | 50         | AGGAGAAUAAUUAGAGCUGUGA  |
| hvu-miR5048a  | <i>HvleckRLK1</i>   | 22            | 1945         | 1966       | UAUUUGCAGGUUUUAGGUCUAA  |
| hvu-miR5048b  | <i>HvleckRLK1</i>   | 22            | 1945         | 1966       | UAUUUGCAGGUUUUAGGUCUAA  |
| hvu-miR6195   | <i>HvleckRLK1</i>   | 21            | 2206         | 2226       | UGAGUACGUAGUAGGGAUGAG   |
| hvu-miR6192   | <i>HvleckRLK10</i>  | 22            | 27           | 48         | UAGGAGAGGGGGGAAGGGAUCU  |
| hvu-miR6214   | <i>HvleckRLK100</i> | 20            | 408          | 427        | CGACGACGACGAGCACGACA    |
| hvu-miR169    | <i>HvleckRLK101</i> | 21            | 762          | 782        | AAGCCAAGGAUGAGUUGCCUG   |
| hvu-miR6184   | <i>HvleckRLK101</i> | 22            | 1190         | 1211       | CGGCGUCGGAUCUGGCCGGCCU  |
| hvu-miR6184   | <i>HvleckRLK102</i> | 22            | 1193         | 1214       | CGGCGUCGGAUCUGGCCGGCCU  |
| hvu-miR6198   | <i>HvleckRLK102</i> | 22            | 701          | 722        | GCUCUGUCUUGGAUGGUCAUUC  |
| hvu-miR6196   | <i>HvleckRLK103</i> | 21            | 299          | 319        | AGGACGAGGAGAUGGAGAGGA   |
| hvu-miR6203   | <i>HvleckRLK104</i> | 22            | 1720         | 1741       | AGACGAUUAAGAAGACCUGCAA  |
| hvu-miR6208   | <i>HvleckRLK104</i> | 22            | 1293         | 1314       | GUGCAUCAAGAUCGGCUCAUCU  |
| hvu-miR6214   | <i>HvleckRLK105</i> | 20            | 24           | 43         | CGACGACGACGAGCACGACA    |
| hvu-miR6196   | <i>HvleckRLK106</i> | 21            | 263          | 284        | AGGACG-AGGAGAUGGAGAGGA  |
| hvu-miR6208   | <i>HvleckRLK107</i> | 22            | 655          | 676        | GUGCAUCAAGAUCGGCUCAUCU  |
| hvu-miR168-5p | <i>HvleckRLK108</i> | 21            | 1121         | 1141       | UCGCUUGGUGCAGAUCCGGAC   |
| hvu-miR6192   | <i>HvleckRLK108</i> | 22            | 7            | 28         | UAGGAGAGGGGGGAAGGGAUCU  |
| hvu-miR6214   | <i>HvleckRLK109</i> | 20            | 717          | 738        | CGACGACGACGAGCA--CGACA  |
| hvu-miR6192   | <i>HvleckRLK11</i>  | 22            | 3            | 24         | UAGGAGAGGGGGGAAGGGAUCU  |
| hvu-miR159a   | <i>HvleckRLK11</i>  | 21            | 2366         | 2386       | UUUGGAUUGAAGGGAGCUCUG   |
| hvu-miR159b   | <i>HvleckRLK11</i>  | 21            | 2366         | 2386       | UUUGGAUUGAAGGGAGCUCUG   |
| hvu-miR6196   | <i>HvleckRLK111</i> | 21            | 677          | 697        | AGGACGAGGAGAUGGAGAGGA   |
| hvu-miR159a   | <i>HvleckRLK12</i>  | 21            | 2312         | 2332       | UUUGGAUUGAAGGGAGCUCUG   |
| hvu-miR159b   | <i>HvleckRLK12</i>  | 21            | 2312         | 2332       | UUUGGAUUGAAGGGAGCUCUG   |
| hvu-miR6196   | <i>HvleckRLK13</i>  | 21            | 143          | 163        | AGGACGAGGAGAUGGAGAGGA   |
| hvu-miR6198   | <i>HvleckRLK13</i>  | 22            | 374          | 395        | GCUCUGUCUUGGAUGGUCAUUC  |
| hvu-miR6214   | <i>HvleckRLK13</i>  | 20            | 2333         | 2352       | CGACGACGACGAGCACGACA    |
| hvu-miR168-5p | <i>HvleckRLK13</i>  | 21            | 1036         | 1056       | UCGCUUGGUGCAGAUCCGGAC   |
| hvu-miR5053   | <i>HvleckRLK13</i>  | 21            | 941          | 961        | CGCAGCUGUAGUCGCCGGCGU   |
| hvu-miR6181   | <i>HvleckRLK13</i>  | 23            | 1011         | 1033       | UGCUCUUCAUGGACUGCGGCGCC |
| hvu-miR6187   | <i>HvleckRLK13</i>  | 21            | 704          | 724        | UGAACAGGUUCGGCGACCUCA   |
| hvu-miR6189   | <i>HvleckRLK13</i>  | 20            | 257          | 276        | AGGUGAUGCUGUGGUGAUCU    |
| hvu-miR6196   | <i>HvleckRLK14</i>  | 21            | 87           | 107        | AGGACGAGGAGAUGGAGAGGA   |
| hvu-miR159a   | <i>HvleckRLK14</i>  | 21            | 1829         | 1849       | UUUGGAUUGAAGGGAGCUCUG   |
| hvu-miR159b   | <i>HvleckRLK14</i>  | 21            | 1829         | 1849       | UUUGGAUUGAAGGGAGCUCUG   |
| hvu-miR6179   | <i>HvleckRLK14</i>  | 22            | 59           | 80         | AACCAGUCGAGGCCAGGGGGUU  |
| hvu-miR6184   | <i>HvleckRLK15</i>  | 22            | 524          | 545        | CGGCGUCGGAUCUGGCCGGCCU  |

Supplementary Table 1 (Continued)

| miRNA ID       | Target ID          | Target length | Target start | Target end | miRNA_aligned_fragment   |
|----------------|--------------------|---------------|--------------|------------|--------------------------|
| hvu-miR6189    | <i>HyleckRLK18</i> | 20            | 1977         | 1995       | AGGUGAUGCUGUGGUGAUCU     |
| hvu-miR6184    | <i>HyleckRLK2</i>  | 22            | 322          | 343        | CGGCGUCGGAUCUGGCCGGCCU   |
| hvu-miR5051    | <i>HyleckRLK2</i>  | 21            | 1089         | 1109       | UUUGGCACCUUGAAACUGGGA    |
| hvu-miR6189    | <i>HyleckRLK20</i> | 20            | 123          | 142        | AGGUGAUGCUGUGGUGAUCU     |
| hvu-miR397b-3p | <i>HyleckRLK21</i> | 21            | 1060         | 1080       | AUCAACGCUGCACUCAACGGC    |
| hvu-miR6195    | <i>HyleckRLK23</i> | 21            | 1239         | 1258       | UGAGUACGUAGUAGGGAUGAG    |
| hvu-miR5053    | <i>HyleckRLK27</i> | 21            | 1178         | 1198       | CGCAGCUGUAGUCGCCGGCGU    |
| hvu-miR5051    | <i>HyleckRLK27</i> | 21            | 2217         | 2237       | UUUGGCACCUUGAAACUGGGA    |
| hvu-miR6192    | <i>HyleckRLK27</i> | 22            | 31           | 51         | UAGGAGAGGGGGGAAGGGAUCU   |
| hvu-miR6191    | <i>HyleckRLK28</i> | 20            | 901          | 920        | UAGAUUUGUCUAGAUUAUGAA    |
| hvu-miR166a    | <i>HyleckRLK31</i> | 21            | 1784         | 1804       | UCGGACCAGGCUUCAUUCCCC    |
| hvu-miR166b    | <i>HyleckRLK31</i> | 21            | 1784         | 1804       | UCGGACCAGGCUUCAUUCCCC    |
| hvu-miR166c    | <i>HyleckRLK31</i> | 21            | 1784         | 1804       | UCGGACCAGGCUUCAUUCCCC    |
| hvu-miR6207    | <i>HyleckRLK31</i> | 21            | 8            | 28         | UGGACGACCUGGGCGCCGACG    |
| hvu-miR6202    | <i>HyleckRLK32</i> | 20            | 159          | 178        | UGAAGAUUUUAAGCAUUGAA     |
| hvu-miR1120    | <i>HyleckRLK32</i> | 24            | 1599         | 1622       | ACAUUCUUAUAUUAUGGGACGGAG |
| hvu-miR1130    | <i>HyleckRLK33</i> | 21            | 1379         | 1399       | UCUGUAACUUAUAUAAGACG     |
| hvu-miR6202    | <i>HyleckRLK33</i> | 20            | 162          | 181        | UGAAGAUUUUAAGCAUUGAA     |
| hvu-miR6196    | <i>HyleckRLK34</i> | 21            | 224          | 244        | AGGACGAGGAGAUGGAGAGGA    |
| hvu-miR444b    | <i>HyleckRLK34</i> | 21            | 1052         | 1072       | UGCAGUUGCUGUCUCAAGCUU    |
| hvu-miR6182    | <i>HyleckRLK34</i> | 22            | 53           | 74         | UGAGUGUGUGAUGGAUGGCUUU   |
| hvu-miR6184    | <i>HyleckRLK34</i> | 22            | 337          | 358        | CGGCGUCGGAUCUGGCCGGCCU   |
| hvu-miR5053    | <i>HyleckRLK35</i> | 21            | 1193         | 1213       | CGCAGCUGUAGUCGCCGGCGU    |
| hvu-miR6214    | <i>HyleckRLK36</i> | 20            | 1383         | 1402       | CGACGACGACGAGCACGACA     |
| hvu-miR171-5p  | <i>HyleckRLK36</i> | 21            | 846          | 867        | UGUUGGCUCGACUCAC-UCAGA   |
| hvu-miR6184    | <i>HyleckRLK37</i> | 22            | 881          | 902        | CGGCGUCGGAUCUGGCCGGCCU   |
| hvu-miR6207    | <i>HyleckRLK37</i> | 21            | 623          | 643        | UGGACGACCUGGGCGCCGACG    |
| hvu-miR5048a   | <i>HyleckRLK39</i> | 22            | 1185         | 1206       | UAUUUGCAGGUUUUAGGUCUAA   |
| hvu-miR5048b   | <i>HyleckRLK39</i> | 22            | 1185         | 1206       | UAUUUGCAGGUUUUAGGUCUAA   |
| hvu-miR6206    | <i>HyleckRLK39</i> | 22            | 954          | 975        | GGCACACGGGCGCAGGCAUAG    |
| hvu-miR6193    | <i>HyleckRLK4</i>  | 23            | 507          | 530        | CUCUGCCACCGGUC-CAUGACGAC |
| hvu-miR6184    | <i>HyleckRLK42</i> | 22            | 1517         | 1537       | CGGCGUCGGAUCUGGCCGGCCU   |
| hvu-miR6207    | <i>HyleckRLK42</i> | 21            | 1314         | 1334       | UGGACGACCUGGGCGCCGACG    |
| hvu-miR6207    | <i>HyleckRLK42</i> | 21            | 323          | 343        | UGGACGACCUGGGCGCCGACG    |
| hvu-miR5051    | <i>HyleckRLK43</i> | 21            | 678          | 698        | UUUGGCACCUUGAAACUGGGA    |
| hvu-miR169     | <i>HyleckRLK44</i> | 21            | 425          | 445        | AAGCCAAGGAUGAGUUGCCUG    |
| hvu-miR6184    | <i>HyleckRLK44</i> | 22            | 2092         | 2113       | CGGCGUCGGAUCUGGCCGGCCU   |
| hvu-miR6188    | <i>HyleckRLK44</i> | 22            | 2234         | 2255       | GGUGGAUCGAUGAACCCGGCGA   |
| hvu-miR6214    | <i>HyleckRLK45</i> | 20            | 447          | 465        | CGACGACGACGAGCACGACA     |
| hvu-miR6214    | <i>HyleckRLK46</i> | 20            | 1368         | 1387       | CGACGACGACGAGCACGACA     |

Supplementary Table 1 (Continued)

| miRNA ID     | Target ID          | Target length | Target start | Target end | miRNA_aligned_fragment |
|--------------|--------------------|---------------|--------------|------------|------------------------|
| hvu-miR6214  | <i>HvleckRLK46</i> | 20            | 815          | 834        | CGACGACGACGAGCACGACA   |
| hvu-miR5052  | <i>HvleckRLK46</i> | 21            | 759          | 779        | ACCGGCUGGACGGUAGGCAUA  |
| hvu-miR6214  | <i>HvleckRLK46</i> | 20            | 2648         | 2667       | CGACGACGACGAGCACGACA   |
| hvu-miR6196  | <i>HvleckRLK46</i> | 21            | 1178         | 1198       | AGGACGAGGAGAUGGAGAGGA  |
| hvu-miR5048a | <i>HvleckRLK5</i>  | 22            | 1272         | 1293       | UAUUUGCAGGUUUUAGGUCUAA |
| hvu-miR5048b | <i>HvleckRLK5</i>  | 22            | 1272         | 1293       | UAUUUGCAGGUUUUAGGUCUAA |
| hvu-miR169   | <i>HvleckRLK5</i>  | 21            | 224          | 245        | AAGCCAAGGAUGAG-UUGCCUG |
| hvu-miR6198  | <i>HvleckRLK50</i> | 22            | 2370         | 2391       | GCUCUGUCUUGGAUGGUCAUUC |
| hvu-miR6210  | <i>HvleckRLK51</i> | 22            | 2071         | 2092       | ACUCCUUGGUUAUCAACUUCGA |
| hvu-miR6202  | <i>HvleckRLK52</i> | 20            | 304          | 323        | UGAAGAUUUUAAGCAUUGAA   |
| hvu-miR5053  | <i>HvleckRLK54</i> | 21            | 2123         | 2143       | CGCAGCUGUAGUCGCCGGCGU  |
| hvu-miR159a  | <i>HvleckRLK55</i> | 21            | 696          | 716        | UUUGGAUUGAAGGGAGCUCUG  |
| hvu-miR159b  | <i>HvleckRLK55</i> | 21            | 696          | 716        | UUUGGAUUGAAGGGAGCUCUG  |
| hvu-miR6192  | <i>HvleckRLK55</i> | 22            | 1279         | 1300       | UAGGAGAGGGGGGAAGGGAUCU |
| hvu-miR6206  | <i>HvleckRLK57</i> | 22            | 89           | 110        | GGCACACGGGCUGCAGGCAUAG |
| hvu-miR5053  | <i>HvleckRLK58</i> | 21            | 1562         | 1582       | CGCAGCUGUAGUCGCCGGCGU  |
| hvu-miR6194  | <i>HvleckRLK58</i> | 21            | 1280         | 1300       | UAUGGGGAUCUGACAGACGAG  |
| hvu-miR6214  | <i>HvleckRLK58</i> | 20            | 365          | 384        | CGACGACGACGAGCACGACA   |
| hvu-miR6185  | <i>HvleckRLK59</i> | 21            | 1071         | 1091       | UCUGGCAGCGACGGGAACAUA  |
| hvu-miR6196  | <i>HvleckRLK6</i>  | 21            | 117          | 137        | AGGACGAGGAGAUGGAGAGGA  |
| hvu-miR6188  | <i>HvleckRLK6</i>  | 22            | 2318         | 2339       | GGUGGAUCGAUGAACCCGGCGA |
| hvu-miR6192  | <i>HvleckRLK6</i>  | 22            | 117          | 138        | UAGGAGAGGGGGGAAGGGAUCU |
| hvu-miR6182  | <i>HvleckRLK60</i> | 22            | 772          | 792        | UGAGUGUGUGAUGGAUGGCUUU |
| hvu-miR5053  | <i>HvleckRLK60</i> | 21            | 2081         | 2101       | CGCAGCUGUAGUCGCCGGCGU  |
| hvu-miR6185  | <i>HvleckRLK60</i> | 21            | 357          | 377        | UCUGGCAGCGACGGGAACAUA  |
| hvu-miR444a  | <i>HvleckRLK61</i> | 21            | 2165         | 2185       | UUGCUGCCUCAAGCUUGCUGC  |
| hvu-miR5053  | <i>HvleckRLK61</i> | 21            | 1559         | 1579       | CGCAGCUGUAGUCGCCGGCGU  |
| hvu-miR6185  | <i>HvleckRLK61</i> | 21            | 1092         | 1112       | UCUGGCAGCGACGGGAACAUA  |
| hvu-miR6196  | <i>HvleckRLK63</i> | 21            | 43           | 63         | AGGACGAGGAGAUGGAGAGGA  |
| hvu-miR6192  | <i>HvleckRLK63</i> | 22            | 38           | 58         | UAGGAGAGGGGGGAAGGGAUCU |
| hvu-miR6184  | <i>HvleckRLK66</i> | 22            | 1178         | 1199       | CGGCGUCGGAUCUGGCCGGCCU |
| hvu-miR6192  | <i>HvleckRLK66</i> | 22            | 14           | 35         | UAGGAGAGGGGGGAAGGGAUCU |
| hvu-miR6187  | <i>HvleckRLK68</i> | 21            | 350          | 370        | UGAACAGGUUCGGCGACCUCA  |
| hvu-miR6214  | <i>HvleckRLK68</i> | 20            | 723          | 741        | CGACGACGACGAGCACGACA   |
| hvu-miR6214  | <i>HvleckRLK68</i> | 20            | 906          | 925        | CGACGACGACGAGCACGACA   |
| hvu-miR6184  | <i>HvleckRLK69</i> | 22            | 1154         | 1175       | CGGCGUCGGAUCUGGCCGGCCU |
| hvu-miR6208  | <i>HvleckRLK7</i>  | 22            | 1291         | 1312       | GUGCAUCAAGAUCGGCUCUUCU |
| hvu-miR6184  | <i>HvleckRLK7</i>  | 22            | 112          | 133        | CGGCGUCGGAUCUGGCCGGCCU |
| hvu-miR6196  | <i>HvleckRLK71</i> | 21            | 200          | 220        | AGGACGAGGAGAUGGAGAGGA  |
| hvu-miR6196  | <i>HvleckRLK72</i> | 21            | 349          | 370        | AGGACGAGGAGAUG-GAGAGGA |

Supplementary Table 1 (Continued)

| miRNA ID      | Target ID          | Target length | Target start | Target end | miRNA_aligned_fragment    |
|---------------|--------------------|---------------|--------------|------------|---------------------------|
| hvu-miR169    | <i>HvleckRLK72</i> | 21            | 783          | 803        | AAGCCAAGGAUGAGUUGCCUG     |
| hvu-miR6194   | <i>HvleckRLK72</i> | 21            | 741          | 761        | UAUGGGGAUCUGACAGACGAG     |
| hvu-miR6192   | <i>HvleckRLK73</i> | 22            | 210          | 231        | UAGGAGAGGGGGGAAGGGAUCU    |
| hvu-miR169    | <i>HvleckRLK74</i> | 21            | 957          | 977        | AAGCCAAGGAUGAGUUGCCUG     |
| hvu-miR5052   | <i>HvleckRLK74</i> | 21            | 374          | 395        | ACCGGCUUGGACGGUA-GGCAUA   |
| hvu-miR6193   | <i>HvleckRLK74</i> | 23            | 343          | 367        | CUCUGCCACCGGUC--CAUGACGAC |
| hvu-miR6184   | <i>HvleckRLK78</i> | 22            | 1193         | 1214       | CGGCGUCGGAUCUGGCCGGCCU    |
| hvu-miR6214   | <i>HvleckRLK78</i> | 20            | 726          | 744        | CGACGACGACGAGCACGACA      |
| hvu-miR6176   | <i>HvleckRLK79</i> | 23            | 2105         | 2127       | GAAGCUGUAGUGCAGCCGGCGUU   |
| hvu-miR6207   | <i>HvleckRLK79</i> | 21            | 296          | 316        | UGGACGACCUGGGCGCCGACG     |
| hvu-miR6198   | <i>HvleckRLK79</i> | 22            | 304          | 325        | GCUCUGUCUUGGAUGGUCAUUC    |
| hvu-miR6192   | <i>HvleckRLK8</i>  | 22            | 23           | 44         | UAGGAGAGGGGGGAAGGGAUCU    |
| hvu-miR1130   | <i>HvleckRLK8</i>  | 21            | 1852         | 1872       | UCUGUAAACUUAUAUAAGACG     |
| hvu-miR399    | <i>HvleckRLK81</i> | 21            | 755          | 775        | UGCCAAAGGAGAUUUGCCCCG     |
| hvu-miR6196   | <i>HvleckRLK82</i> | 21            | 14           | 34         | AGGACGAGGAGAUGGAGAGGA     |
| hvu-miR159a   | <i>HvleckRLK83</i> | 21            | 1663         | 1682       | UUUGGAUUGAAGGGAGCUCUG     |
| hvu-miR159b   | <i>HvleckRLK83</i> | 21            | 1663         | 1682       | UUUGGAUUGAAGGGAGCUCUG     |
| hvu-miR168-5p | <i>HvleckRLK83</i> | 21            | 1037         | 1057       | UCGCUUGGUGCAGAUCCGGGAC    |
| hvu-miR6196   | <i>HvleckRLK83</i> | 21            | 33           | 53         | AGGACGAGGAGAUGGAGAGGA     |
| hvu-miR159a   | <i>HvleckRLK84</i> | 21            | 1648         | 1667       | UUUGGAUUGAAGGGAGCUCUG     |
| hvu-miR159b   | <i>HvleckRLK84</i> | 21            | 1648         | 1667       | UUUGGAUUGAAGGGAGCUCUG     |
| hvu-miR168-5p | <i>HvleckRLK84</i> | 21            | 1022         | 1042       | UCGCUUGGUGCAGAUCCGGGAC    |
| hvu-miR6196   | <i>HvleckRLK84</i> | 21            | 18           | 38         | AGGACGAGGAGAUGGAGAGGA     |
| hvu-miR6214   | <i>HvleckRLK86</i> | 20            | 924          | 943        | CGACGACGACGAGCACGACA      |
| hvu-miR6181   | <i>HvleckRLK86</i> | 23            | 1905         | 1926       | UGCUCUUCAUGGACUGCGGCGCC   |
| hvu-miR6193   | <i>HvleckRLK86</i> | 23            | 1294         | 1316       | CUCUGCCACCGGUCCAUGACGAC   |
| hvu-miR168-3p | <i>HvleckRLK87</i> | 24            | 1100         | 1122       | GAUCCCGCCUUGCACCAAGUGAAU  |
| hvu-miR6184   | <i>HvleckRLK87</i> | 22            | 1108         | 1129       | CGGCGUCGGAUCUGGCCGGCCU    |
| hvu-miR6190   | <i>HvleckRLK87</i> | 21            | 406          | 426        | CGAGGAAAGGAAGAAGCCAUG     |
| hvu-miR6192   | <i>HvleckRLK87</i> | 22            | 341          | 362        | UAGGAGAGGGGGGAAGGGAUCU    |
| hvu-miR6214   | <i>HvleckRLK88</i> | 20            | 924          | 943        | CGACGACGACGAGCACGACA      |
| hvu-miR6181   | <i>HvleckRLK88</i> | 23            | 1905         | 1926       | UGCUCUUCAUGGACUGCGGCGCC   |
| hvu-miR6193   | <i>HvleckRLK88</i> | 23            | 1294         | 1316       | CUCUGCCACCGGUCCAUGACGAC   |
| hvu-miR6214   | <i>HvleckRLK89</i> | 20            | 36           | 55         | CGACGACGACGAGCACGACA      |
| hvu-miR6196   | <i>HvleckRLK89</i> | 21            | 1946         | 1966       | AGGACGAGGAGAUGGAGAGGA     |
| hvu-miR6196   | <i>HvleckRLK9</i>  | 21            | 188          | 208        | AGGACGAGGAGAUGGAGAGGA     |
| hvu-miR6184   | <i>HvleckRLK90</i> | 22            | 634          | 655        | CGGCGUCGGAUCUGGCCGGCCU    |
| hvu-miR5052   | <i>HvleckRLK90</i> | 21            | 1871         | 1891       | ACCGGCUUGGACGGUAGGCAUA    |
| hvu-miR6198   | <i>HvleckRLK90</i> | 22            | 687          | 708        | GCUCUGUCUUGGAUGGUCAUUC    |
| hvu-miR6214   | <i>HvleckRLK91</i> | 20            | 2003         | 2022       | CGACGACGACGAGCACGACA      |

**Supplementary Table 1** (Continued)

| miRNA ID      | Target ID          | Target length | Target start | Target end | miRNA_aligned_fragment |
|---------------|--------------------|---------------|--------------|------------|------------------------|
| hvu-miR6192   | <i>HvleckRLK91</i> | 22            | 60           | 81         | UAGGAGAGGGGGGAAGGGAUCU |
| hvu-miR6189   | <i>HvleckRLK91</i> | 20            | 549          | 568        | AGGUGAUGCUGUGGUGAUCU   |
| hvu-miR6207   | <i>HvleckRLK91</i> | 21            | 618          | 638        | UGGACGACCUGGGCGCCGACG  |
| hvu-miR6184   | <i>HvleckRLK92</i> | 22            | 1205         | 1226       | CGGCGUCGGAUCUGGCCGGCCU |
| hvu-miR6214   | <i>HvleckRLK92</i> | 20            | 921          | 940        | CGACGACGACGAGCACGACA   |
| hvu-miR6186   | <i>HvleckRLK93</i> | 21            | 1640         | 1660       | CGAGGAAGGCGCUGAGAGAGA  |
| hvu-miR6214   | <i>HvleckRLK93</i> | 20            | 765          | 783        | CGACGACGACGAGCACGACA   |
| hvu-miR6198   | <i>HvleckRLK94</i> | 22            | 1343         | 1364       | GCUCUGUCUUGGAUGGUCAUUC |
| hvu-miR6214   | <i>HvleckRLK94</i> | 20            | 297          | 316        | CGACGACGACGAGCACGACA   |
| hvu-miR6195   | <i>HvleckRLK95</i> | 21            | 337          | 357        | UGAGUACGUAGUAGGGAUGAG  |
| hvu-miR6190   | <i>HvleckRLK96</i> | 21            | 113          | 133        | CGAGGAAAGGAAGAAGCCAUG  |
| hvu-miR168-5p | <i>HvleckRLK96</i> | 21            | 269          | 289        | UCGCUUGGUGCAGAUCCGGAC  |
| hvu-miR5053   | <i>HvleckRLK96</i> | 21            | 1178         | 1198       | CGCAGCUGUAGUCGCCGGCGU  |
| hvu-miR6184   | <i>HvleckRLK96</i> | 22            | 1212         | 1231       | CGGCGUCGGAUCUGGCCGGCCU |
| hvu-miR6185   | <i>HvleckRLK96</i> | 21            | 2076         | 2096       | UCUGGCAGCGACGGGAACAUA  |
| hvu-miR6207   | <i>HvleckRLK96</i> | 21            | 1449         | 1469       | UGGACGACCUGGGCGCCGACG  |
| hvu-miR6214   | <i>HvleckRLK96</i> | 20            | 2075         | 2094       | CGACGACGACGAGCACGACA   |
| hvu-miR6184   | <i>HvleckRLK97</i> | 22            | 1132         | 1153       | CGGCGUCGGAUCUGGCCGGCCU |
| hvu-miR6208   | <i>HvleckRLK99</i> | 22            | 1281         | 1302       | GUGCAUCAAGAUCGGCUCAUCU |
| hvu-miR6214   | <i>HvleckRLK99</i> | 20            | 939          | 958        | CGACGACGACGAGCACGACA   |
| hvu-miR6214   | <i>HvleckRLK99</i> | 20            | 759          | 777        | CGACGACGACGAGCACGACA   |
