# Supplementary material for: Genome-Wide Comprehensive Identification and In Silico Characterization of Lectin Receptor-Like Kinase Gene Family in Barley (Hordeum vulgare L.)
Source: Genet Res (Camb). 2024 Feb 27;2024:2924953. doi: 10.1155/2024/2924953 (PMC10914435; doi:10.1155/2024/2924953)
Supplement: Supplementary Materials — S1 Data: protein sequences of HvlecRLKs (txt). S2 Data: CDS sequences of HvlecRLKs (txt). S3 Data: genomic sequences of HvlecRLKs (txt). Supplementary Table 1: miRNA targeted HvlecRLKs (Doc). [file 2924953.f1.zip]

Archive with 4 entries (4 files):
- S1 Data. Protein sequences of HvlecRLKs.txt
- S2 Data. CDS sequences of HvlecRLKs.txt
- S3 Data. Genomic sequences of HvlecRLKs.txt
- Supplementary Table 1.miRNA targeted HvlecRLKs.pdf
