# Supplementary material for: Genome-Wide Comprehensive Identification and In Silico Characterization of Lectin Receptor-Like Kinase Gene Family in Barley (Hordeum vulgare L.)
Source: Genet Res (Camb). 2024 Feb 27;2024:2924953. doi: 10.1155/2024/2924953 (PMC10914435; doi:10.1155/2024/2924953)
Supplement: Supplementary Materials — S1 Data: protein sequences of HvlecRLKs (txt). S2 Data: CDS sequences of HvlecRLKs (txt). S3 Data: genomic sequences of HvlecRLKs (txt). Supplementary Table 1: miRNA targeted HvlecRLKs (Doc). [file 2924953.f1.zip › S1 Data. Protein sequences of HvlecRLKs.txt]

>HvleckRLK64
MVNSELGDPSDNHVGLDLGSPVSVSAVDLVDSGIVLKSGNLTTAWIDYRGAEHLLEVSLSYSGVKPKRAVFSVAVDLSPYLREAMYVGFSASTEGSTQQHTIKEWTFQTFGLPPATNASTFTNATSNVSEPAVPGVAAASGGATSKKRFGRAITILGPVALAVAFVFFACVSVKKLAELTSRKDAIFLPGLLKGPRKFSHKELSVATRGFHASRVIGRGAFGTVYKAAMPGAATTYAVKRSTQAHQSRSEFVAELSVIACLRHKNLVQLEGWCDEKGELLLVYEYMPNGSLDKALYGDPCTLSWPERHNVAAGIASVLSYLHQECEQRVIHRDIKTGNILLDGNLSPRLGDFGLARLMDHNKSPVSTLTAGTMGYLAPEYLQSGKATDQTDVFSYGVVVLEVCCGRRPIDREETDKDSKNVNLVDWVWRLHGEDRLIEAADARLNGEFDREGMLRLLLVGLSCANPNCEERPAMRRVVQILNREADPVPVPRKKPLLVFSSSASIKLQEMAFSCGDDVRGGYPAAATTTANPASPRSEGAGIER
>HvleckRLK65
MGSRRLPTPTTLVLLLLLHLYYAPRWAFSLSFSLNFSDPSAGSWVDLDGDASITPPRLELTGNVQSSVGRASYRHKVPLWNSDTGEMASFTTNFSFRITPEKTGVTGDGMAFFLGHFPSEIPPTSKGGGLGLLPAFTDGTGSTRIVAVEFDTLRNSHYADINGNHVGIDVSSVTSVASTDTTTRPGKNLTSSYVMEATVRYYNVSRMLAVDLLIDDALYKVNATVDLSRCLPEEVAVGFSAATGDFSEQHQILSWSFSSTLPPLPKRKNRKKLVMILLSVLVPLLLLLLVCSAVVLWRRHKKMGQNMDSQERCANRTDLERGVAAGGPRRYTYNELAAATRHFAEEEKLGRGGFGSVYRGHLTLTSAAADHRAVAVKMLSAESSAQGRKEFEAEVRIISRLKHRNLVQLLGWCDSRKGLLLVYELVREGSLDRHLYSKDGRHLTWQQRYKIILGLGSALHYLHGEWEQCIVHGDIKPSNIMLDSSMSTKLGDFGLARLVDHDTGLLQTTKAVLGTVGYIDPEFVNTRRPCTESDVYSFGVVLLEIVSGRRPVVETAGKSFTLLRWVWSLYGRNVILDAADERLRGDEAEERWMVRVLVVGLWCAHPDRSERPSVAQAMHVLQSDEVRLPVLALQMYRTMQYPRSSSGPYEAFSIDSSTSSSGCVRSSFVSTGDDSLSSGSSSTALLRHSKDLAN
>HvleckRLK66
MKFFLLCFLLCFGLELAFFTAASDDQLLYHGFTAGTNLTIDEAASVTSNGLLELTNGSLGCKGHAFYPTPLHFRKSHDDAVQSFSVAFVFAIHSSYPIMSRQGLAFVVAPSMNFSSALANQYLGLMNSQNNGNLSNHIFAIELDTVLNIEFKDNNTNHVGIDINSLQSIESYPAGYYDDRNGTFQDMVLASGDAMQVWVDYNGDAKKISVTMAPLQMEKPTRPLISADYDLSSVLQDPSYIGFSSSGGEVDSRHYVLGWSFGMNKPAPLINIAKLPKLPRPKHQSKLLKIILPIASAIFVFAVGSMVILLVRRKLRYAELKEDWEIEFGPHRFSYKDLYHATEGFKNKHLLGAGGFGKVYKGTLPSTKLEVAVKRVSHDSRQGLKEFVAEVVSIGRIRHRNLVQLLGYCRRKDELLLVYDCMSNGSLDKYLYCDDQMLILNWAQRFRIIKDIASGLLYLHEKWEKVVIHRDIKASNVLLDSEMNGRLGDFGLARLYDHGADMQTTHVVGTIGYLAPELICTGKATPLTDVFAFGIFLLEVVCGQRPVNINARGNQPLLVDWVLEHWNKGSLTEAVDTRLQNDYNVDEACLVLKLGLLCAHPFTNARPNMQSIMRYLD
>HvleckRLK67
MVLVSASAAHARAPPTTLTPPPAATAPLSSSTLPLPRHNATATQVARTCPRLISHLTYSLPVGLSSAHSPPRSSPCKCLAIPTPPPMPPAMATLTTTAPPPPLILLTTLLLLLLADAAAVRFDYATLTLATLELLGDAHLNNNTIRLTRDLPVPTSASGRALYAAPVRLLAGFSTSFAFTVTTLNRGSVGGGLAFVVAPDAASVGDAGAFIGLDPAADVAVEFDTLMDLEFGDVNGNHVGVDLGSMVSAAAADLGLAGVELTSGRTVYAWIEYSPGKAMDVFVSYSAKRPAAPVLSTPVDLAGYVKEQAFVGFSASTQGSTEIHAIEWWSFSTPSPPSPAPSKPPPVAPPPASPINPTLPSTPQLPGITPPATPATVSAPPTSSVTAASAPANSVFRKNAKTPHP
>HvleckRLK68
MRLKPVSVVSFLVLLLFHFLARGDGQFIYNGFAGAQLDLDGMAVVEPDGKLALTNITSQLKGSAFHPTPLRFHEPATNGTVARSFSATFVFAIVTDLVTVGGNGLAFFLAPTKNLSMASPSQFLGLFNPENNGNASNHVFAVELDTILNPEFRDINSNHVGVDVNGLASVVAEPAGYYDDGTGDFKNLTLIGGDAMQVWVDYDGRSKVLNVTLAPVEAPRPKKPLISITIDLSPVLNGTAYVGLSSSTGPFRTRHYVLGWSFALDGAAPLLDYSNLPKPARIGDSKRRSKARDVILPVATPILALVVVAGVSLLVWRRLRYAELREEWEVEFGPHRFAYKDLYRATGGFDGEQLLGVGGFGRVYKGVLRVSKKEVAVKILMSHDGAKQGMKQFVAEVVSLGRLRHRNIVQLLGYCRRKGELLLVYEYMPNGSLDNWLYDRNAPPLSWAQRLSAIRGVASGLLYLHEDWEKVVVHRDIKASNVLLDGDMNARLGDFGLAKLYDRGTDPQTTSVVGTMGYLAPELACTRRVTPATDVFAFGSFVLEVACGRRPIEHGTVDDNRLVLADWVLERWHNGDVTDTADPRLCGTYDVEEAAAVLRLGLVCSHPTPAARPSIRQVVQYLDGDMPMPEPAPTYRSFTARASMHNAEGNESYVASYPLSSATSVGASSVLSGR
>HvleckRLK69
MLPRKLLLLLLVAVGVEAGVEFAYEGFPGAGLALDGIASVTPDGLLLLTNDTDLNVAHAFHPAPVRFHRTSSFSTTFVFAIVSELVDLSTSGFAFLVAPSSRDLSSTMAAQYLGLFNASDNGDPRNRVLAVELDTVRNPEFADMNDNHVGVDVNSLNSSAAAMAGYYDDATGAFRNLSLASREPMQVWVDYDAAATEITVALAPARSPRPRRPLLTTRIDLSTVVADTAYVGFSSGSSIVLCKHYVLGWSFSLDGAAPALDHAKLPTLPRIGPKPQSKTLAIALPIVTTAAVLAAVGVGLLLLRRRLRYAELREDWEVEFGPQRFALKDLYDATAGFKDKRLLGAGGFGSVYRGVLPGSRAEVAVKRVSHESRQGMREFIAEVVSIGRLRHRNLVQLLGYCRRRGELLLVYDYMPNSSLDKHLHGQGQGHGHALGWAQRLRIIRGVASGLVYMHEDWEQVVIHRDIKASNVLLDGEMNGRLGDFGLARLYDHGADPQTTHVVGTMGYLAPELVRTGKATTLSDVFAFGAFLLEVACGRRPIEIEEGKEDVDGFVLADWVLGHWRNGAITRAVDAKLGTGYDAGEADTVLRLGLTCLHPSPAARPSMKQVTQYLDGSAPLPELPPTYVTVNMLAAMEAHQGVLGTWAVWRSASSVATMSDIGLSGR
>HvleckRLK70
MPPPCPSTAFFLLPLLLAVHLPPAAAADSRHASTTAAPSYRRISWASNLTLLGSASVLPGAVAVALTTNSSDGIGAGRALFSEPVRLLLPQPDPRAAPVQASFSTRFTFRITPSPSYGDGIAFVLTSSRTFLGASNGFLGLFPSASASDDGELAGVYTVAVELDTHRDVALRDPDGNHVALDAGSIFSVASASPGVDLKAGVPITAWIEYRAPRRRLRAWLSYSSSRRPDKVALSVDVDLSGLLLTYMYAGFSASNGEGTAVHVVESWTFRTFGFPNTTHASASPIPSPPPNPKDQASLKSPLPLPKNNHHHHNLFYTVLGGALGGVVLLVLVVSSSILWIRHSKRRTGEKTAVLFDDKNFRGMLSMEVVRAATKDFGSENVIGIGGSGAIVFEGVLPSGSRVAVKRFQAMLPCSKAFLSELRAMLDCPHHPNLVPLLGWCSSEHDLVLVYEFMPNGNLDSALHTKGGATLPWEARFRAVLGVASALTFLHDECEHRILHRDVKSSNVLLDGDFNARLGDFGLARVVSHGGVPLATQPAGTLGYLAPEYVHSGVASERSDVYSFGVVALEVATGRRPTEKGTAVVDWVWSLWGRRRLVDAADQRLQGRFVAEEMRRVLLVGLCCVHPDCRKRPGMRRVVRMLDGSAPMTLVPDKKPPVVLKSPLNQTSSVNTMDTINTAFYSCR
>HvleckRLK71
MLPRYLLLCLIFLIPASASYTNDGFTYDGFSSGMLRFDGVASISSRALMLTDGVAQSVGRAFFGGRFDSISSFSTTFVFVISPPYSDLGGHGLAFTVSATTDSLLGASPSQYMGIFNPENNGNVTNQLFAVELDTIQNPEFRDINSNHVGIDVNTLVSINSHPAGYYTPDGNFTDLLLISGKPMQVWVDYDDSSHQVNVSLAPYLEQKPQRPLLSNTINLTSVLPRSVYVGFASATSTVRSIHRIIGWSFNPNGEAKPLNYSVLSEIIQDVRRDAQSRSHVPKGVLIPVIIVSVFITTVVIVAIYVYMKKARQSGDWEIDCGSASFTYKDLAAATNSFSDKMLLGKGGFGKVYKGLLQTSKQNVAIKRVSPESKQGMKEFIAEITILGHLHHRNLVQLLGYCRNKSELLLVYDYMPNGSLDRVLHGRDKQTVGWVHRFNIIKGIAAGLCYLHEDWEKVVIHRDIKASNVLLDNEMNGRLGDFGLARLHNHGTDAHTTHLAGTWGYIAPELSRLGRATKATDVFAFGVFMLEVVCGRRPIQVNDSDGEPVLLTDWVVDAWESGSILNTVDPKLEDYLSEEAELVLKLGLLCSHSAQSARPCMRLVMQYLSKDVLLPDYQPSFLSLTSRDEEFGQHILSCPSVAATMTGLSGGR
>HvleckRLK72
MFLKPSHMVAPLVLLLMAAGHCCLEATGGYDGWQFVLNGFAGANLTLGGTSMVLPNGLLMLTNGATRKMKGHAFHPSPLPFGSGSNGAGPLRSFSTTFVLAIFGHGRHADLSVRGLSFLISASWEVLSTALSGQPLGLSNGNQNASIFAMEFDTLYNAQFSDTKNKYVGVDGDSLVSLNSANIGNYDDGTGRLLNLSVISWKAIQVWVDYDSKATVITMTMAPLGVVRPKQPMLQTTIDLSGVVQSTAYVGFSSAMCNITSGHFILGWSFALHGPAPILDISVMPALPSAWTNNNQSIPPPSMSMSLKLMLALASVTLVSVGIGIYVSARRRINFSKVQEDWEVSLGPNRFSYKDLFHATEGFSEKNLLGRGGFGSVYKGVLGKPDMEVAVKRMSHNSRQGVKEFIAEVVSIGRLRHRNITRLLGYCRRKGELLLVYDYMENGSLDKYLHTRNGPTLCWSQRYSIIKGVASSLLYLHEEWEQVIIHRDIKASNVLLDNKMNGRLGDFGLARIYDHETAAETTHVAGTMGYLAPELSRTGRPTPFSDVYAFGVFLLEVTCGRRPIFIDEQNNRVLLVERVLQHHLNNSMLDTVDPRLGVEFNMEEVTMVLKLGLLCTYPLPNARPIMRKVMQYLDHDQSPPDLSPAYISYLMMVQMQNEGFDSDNMPRSRPTASVATLSGESSATILREGR
>HvleckRLK73
MLLLGPYHLVALLLLLVAAGRCLAATGRGDDGRRFVYNGFIGVDLTLDGAAQVMPNGLLMLTNGSLGVTGHAFHPFLLPFRNATGAMRSFSTIFAFAIFGQYDDLSSDGMAFFVSASKETLSGAQSGRYLGLLNQTSNGNQSTRIFAVELDTSKDAEFLDINNNHVGVDVDSLWSLHATPSGYNDDGTGLFQNLSLINRKSIQVWVDYDATAKEITVTIAPLGVARPKKPLLQTIIDLSDVVQSTAYVGFSSASGSIVTAKHFVLGWSFALDEPAPALNISILPALPPASPVRYPYSTRLAILPSGITLLVLAVMLALAIGIGIYICVRQKRLKYSEVREDWEVPFGSNRFSYKDLFHATKGFSDKNLLGRGGFGTVYKGVLREPEMEVAVKRMSHDSRQGVKEFIAEVVSVGRLRHRNLVQLLGYCRRKDELLLVYEYMKNGSLDKYLHGRNDQVLCWSQRYSIIKGVASSLLYLHEDWEQVVIHRDIKASNVLLDSKMNGRLGDFGLARIYDHENAAETTHVAGTMGYLAPELSRAGRPTPFSDVYAFGVFLLEVTCGRKPIFIDDQSNRVLLVEWVLEHHHNGSMLDTVDPRLGGEFNTEEVTIVLKLGLLCTYPSPNARPIMRKVMQYLDRDQLPPDLSPAYISYIMMAQMQNERFDSHDMACSQPAMSVATLSGESVTILREGR
>HvleckRLK74
SNSRHGSKNFARSNPEALVKGESSLHRPTYRSQIPSTIAKDKETGERSFSAAGDTRAMLLLGLYHLVALLLLLVAAGRCLAATGGGDDGRQFVYNGFSGANLTLDGAAGVMPNGLLMLTDGRKVKGHAVQPFPLPFRTASNAAGSMRSFSTTFVFAIFGPYEDLSSDGIAFFVAASKEVLSAASPGQFLGLLNEDNIGNRSARIFAVELDTFKDAELRDLNDNHVGVDVDSLVSIDSADAGWYYDDGTGMFQNLSLISRKPMQVWVDYDSRATDITVTMAPLGVARPKRPLLQTNVNLSGVVPNMAYVGFSSATNFFSTRHFILGWSFALDRPAPALDISKLPQLPSAWSNSRSMPISIKIVLALASVTMVSLGIGIYIFVRRLRLKYSEVREDWEVPFGSNRFSYKDLFHATKGFSDKNLLGRGGFGSVYKGVLREPEMEVAVKRMSHNSRQGVKEFIAEVVSVGRLRHRNLTQLLGYCRRKDELLLVYDFMENVSLDKYLHGRNDQLLCWYQRYSIIKGVASSLLYLHEEWEQVIIHRDIKASNVLLDSKMNGRLGDFGLARIYDHETAAETTHVAGTMGYLAPELSRAGRPTPFSDVYAFGVFLLEVTCGRKPIFIDEQNNRVLLVEWVLEHHHNGSMLDTVDPRLRGEFNTEEVTIVLKLGLLCTYPSPNARPIMRKVMQYLDHDQLPPDLSPAYISYIMMAQMQNGGFDSHDMACSQPAMSVATLSGESSVTILREGR
>HvleckRLK75
VYLSLLKRKRESKLWRETMPALLLLLSLSLNVALASSADAGQFTYQGFATANLTLDGLAVVMPNGLLALTNFTSQEKGHAFHPAPLRFLNATASSTAVARSFSASFVFAIVSVFDSLSDQGLAFVLAPTSNLSSANGGQYLGLLNATNGTASDHILAVELDTIRNPELSDINSNHVGINVNSLISQQAKPAGYYGDDDDMAFRDLMLISRKPMQVWVDYDGHGRRLNVTLSPVQVPKPKNPLLSETIDLSTIVADTMYAGFSSSSGVVSTHHYVLGWSFSFDGPPPPLDFSKLPSLPRVGPEPPSKTLYIALPLAIILLIAAVLAVAFIVRRRRRFAEVREDWEEDFGPHRFAYKDLFHATDGFKNRNVLGVGGFGKVYKGVLPVSNLEIAVKRVSHDSRQGIREFIAEVVSIGRLRHRNLAQLLGYCRRNGELLLVYDYMANGSLDKYLYNKNGPPLCWPQRYWIIKGIASSLLYLHEDWEQVVIHRDIKASNVLLDRQMNGRLGDFGLARLYDHGTDAQTTHVVGTMGYLAPELMRTGKATPSTDVFAFGVFLLEVVCGRRPIGSDEHNNPVVLVDWVLEHHRNGSIIDTVDSRLEGNFNKEEVSIVLKLGLLCAHPLPTARPSMRKVMQYLDGDQAAPHLTPTYMSYNEMALIQSEGFDSYITPCPSPAMGICSGSGESLVTVLFSGR
>HvleckRLK76
MFLQPHHLVTLLLLLVGADLWHPATGGGSSSGDDGRQFAYNGFVGANLTLNGGATVTPKGLLMLTDGTLQMKGQAFHPSPLPFHAEANGTGVMRSFSTTFVFAIFGPYANLSSHGLTFFASASRDVLSTALPGQFLGLLNGTNGNQTAPIFAVELDTLLNADFRDISSNHVGVDINSLISIDSADAGYYDDSTGRFQNLSLISRKAMQVWVDYDGVATEITVTMAPLGVPRPRKPLLRTAVDLSGVVQSTAYVGFSSATGVMSTRHFVVGWSFALDVPAPALDISALPVLPRAWPKPRSRILEIVLPIVSVMLVFAVGIGVCFFVRRRHKYSELREDWEDAFGPHRFSYKELFHATKGFSNKNLLGVGGFGSVYRGKLRKPDKEIAVKRVSHESRQGMKEFVAEVASIGRLRHRNLVPLLGYCRRKAELLLVYDYMPNGSLDKYLYDASVGTLDWRQRFHTIRGVASGLLYLHEDWEQVVIHRDVKASNVLLDSEMNGRLGDFGLARLYDHGADAHTTHVVGTMGYLAPELGHTGKATPSTDVFAFGAFLLEIICARRPIEQNDRNSRIVLVDWVIEQWRNGSIIDVADTRIPDGFNPDKVSLVLKLALLCSHPLPTARPTMRQVMQYLDGDMLLPDLSPAYLSFSMLERMYNGEFNQNVMPYTSSTSVGAISDLSGGR
>HvleckRLK77
MRSRATGTCFMALQFVLFFTFNIAGVSPLSFKLNFTESNYTASTAIKFQEDAFYNKGIKLTKDQLKDQITNSVGRAVYTDPVLLWDTATGQLADFSTRFTFRITATNTSATDDPYGEGLAFFLSPYPSVVPNRSTGGFLGLFSNGSDQNDPSNELVAVEFDSHDDTWDPKGNHVGIDIHSIVSVAHVVWNSSINDGRIANAWVSYKASSLTLSVFLTYLGDPQFSGNSSLSYSVDLRKYLPGKVAIGFAAATGRFVELHEILFWEFNSTDLQLMKTEKMRSVLVISLATTISVVVCSMCLVWCLLHFRTRRSRNEKQKKLGYHESIDGEFEKGSGPRRFRYNELVAATRNFALERKLGEGGFGAVYQGLLKDQNLDVAIKRVAKGSTQGRKEYISEVKIISRLRHRNLVQLEGWCHEHGEFLLVYEFMPNRSLDTHLYDNSNLLTWPLRFKVTAGVASALLYLHEEWEQCVIHRDIKPSNVMLDSVFNAKLGDFGLARLIDHDRASQTTVLAGTMGYMAPECVTTGKASKESDVYSFGILALEIACGRRPVVLKEDDDKVILVQWVWDLYGRNKILNAVDSRLDGAFEDRDAACLMVVGLWCAHPDYNLRPSIRQVISVLKFEAPLPILPPKMPVAMYFAPPISLCRFSYTSSDGTLKQQELERSNGYGKTSSSTTTNASSSPPSVRLPEVGY
>HvleckRLK78
MPPPDRAMPLLLLLLFLGLGPAAAADEQFVFDGFTGANLTMDGMATVTANGLLQLSNATSQLKGHAFFPTPLQFHRAPNSTAMQSFSTAFVIGIIGAYDTLSSHGMAFVVAKSRNFTSALPGQFLGLVGSANNGNATNHLFAVEFDTILNSEFNDMSGNHVGIDVNGLNSVDADNAGYYDDGTGAFRNISLVDRKPMQVWVDFDGQTMQVNVTMAPLQVARPKRPLLSTTVNLSSVIDDTAYVGFSSSSGILFCRHYVLGWSFKMNGAAPALNISSLPSMPVTFPKPRSKTLEIVLPIASALLVFAVAAAVFVYMRRRRMFAELKEEWEVTFGPHRFSYKDLYHATDGFSDERLLGIGGFGRVYRGSLPKSKSAEIAVKKVAHGSRQGMREFVAEVVTIGRLRHRNLVQLLGYCRRKGELLLVYDYMPNGSLDKHLYGDQKEKAALGWGQRFGIIKGVASGLLYLHEDWEQVVVHRDIKASNVLLDADMNGRLGDFGLARLYDHGTDPHTTHVVGTMGYLAPELGHTGKASKASDVFAFGAFMLEVACGRKPVVLDARDNHLVLVDWVLDQWRAGTVTGAVDPRLGGDVVEHEAGLVLRLGLLCSHPLPAARPTTRQVAQYLDGDLKLPELSPTYQSFNMLALMQDQGFDPYVMSYPMTSITAGTMSQMSDLSGGR
>HvleckRLK79
MVAGSHRNHLAMPIPNTNNILSFSCIASAAVVILGRTCSCLQFTYPSFNASNRDDFSFSPGSAISNKSLQITPNTGNMSHRSGRVAYARDTLKLWNSKRTELTSFRTEFVLNILPQNGTGEGMAFMLTNNPSLPSNSSGQWLGVCNNRTDGAKTNRLVAVEFDTRKSYKDDLDGNHVGLDLNSIKSVEQYPLSNQSIVLSSGSDVLVGINYDGASLLFRVTLVQYSTSGQQHVSLLSRYINLSVVLLDDIYLVFAGSTGNFTQLNQIKSWNFTTIDDDATVRREHYWRRKLLLALVTLLVLSICVFVGLFMWRRLTRRRRLAYHNLEKMIDAHGPVKFKLRELRRATANFSPTRKLGRGGFGTVYLGYVDRMNLEVAVKRVSTDKKADTNRGEKEFVAEVNTISKLSHRNLVKLIGWCHEKGELLLVYEYFPMGSLDKLLYARERTMASSSASRSRDTPEPELTWERRYKIICGVASALDYLHHGSSKRILHRDVKASNVMLDAEYNARLGDFGLARVIQHDGVTHHSTQVVAGTRGYMAYESFFTGRASLDTDVYAFGVFIMEVVSGRSPSNAVQQQHMHNSDHHGEEDYSSSGGARHPMPVHIVDWIWRLYGEGKALHAADPLLGGEFEQAQVDCAVRLALACCHPNPRERPSMRTAVQVLIDGAPAPEPPVNKPAFVWPPGGNQREMELPDVGLLFTGGARQHSSFCSMTSTSLAGR
>HvleckRLK80
MEHLAFCLTFLLSVTIFLASSATASEDDQFIYSGFFGSNLTLNGAAMVTKDGVLELTNGKPDYMGYAFYPSSWKLRGLPDREVQSFSVSFVFGIASVDFNGCPNSMNFSIHQGLTNKSMLAIVLEACHQDNNFQENNDNDVSISIGGKSSAKSPAGFYDGKSGIFNNLPLLSHNMMQMSVEYDLAATQINVTLSPLEMVKPLRPLLSLSLNLSTVLEDPSYIGFSASTRIISLRYSVLGWSFGMNRPAPTIDIAKLPQLPRVVDPKRQSKLLKIILPIAMATLVLLVGTTVILFVRGRMRYAELYEDWEHEFGPHRFSYKDLFQATEGFHNKNLLGRGGFGKVYKSVLPVSKLQVAVKRVSHESKQGIKEFIAEVVSIGRLRHRNLVQLLGYCRRKGELLLVYEYMPNGSLEKYLYVEADKTTLDWAQRLQIIKGVASAIFYLHEKWEKVVIHRDIKASNVLLDNEMNGHLGDFGLARLYDRGTNLQTTRVAGTLGYIAPELARTGKASPLTDVYAFGIFILEVTCGKRPINNCSQDGPKMLVDWVVEHWQGGSLTDTLDRRIQGEYDADEVNLVLRLGLLCAHPFCSTRPSMRQVMQYLDGDMPLPELPPINLSYSMLALTQNEGFDQYTSLPCTVSSNGMTFSLFSGR
>HvleckRLK81
RASQRPPTGMASFSSATTSTCFLLLHLVIIFFHLPTPAVSLAFNCSRFTTEDLKDMKFEGDASFNTLYGSIPMNTNTYRVASRVSYSAAPLQLWDKMTGEVASFTTQFQFQIHITGDESSKGGMAFFLAGYPSSLPGNCTPDSLGLTNQSADAVPSGDSRFVSVKFDNFNNTIVADPDTSSYDHIGINVNSLISVSTQPLPSFTLNNTQTAQIEYDNVSSILAVTLWSDDADGQDQRSSSLSSKVDFKSVLPEQVSIGFSTNTLSGMDIFLNSWYFNSSLEPQQTPPPPPSSPPQSPPGLGSGVIVGAAAGATMFLVLLFAAAAALVVRRRRHQNMMETEEYYTDSEGEGEPMSEIEMGTGPRRFPYRELMEATKNFAAEEKLGQGGFGAVYQGYLRDPAGLAVAIKRLQSSIQGKKEYKSEVKVISRLRHRNLVQLIGWCHGHDQELLLVYELMPNRSLDIHLHSKQGTFLTWPMRMKILLELGSALLYLHEEWEQCVLHRDIKPSNVMLDESFGAKLGDFGLARLVDHAAGMQTMTAISGTPGYLDPECVNTGRASAESDVYSFGVVLLEVACGRRPMSVIAPNQHQQKNGGVFRLVEWAWGLYGRGAILEAIDERLNGDYDAAEVERVMVIGLWCAHPNPSARPSIRTAMATLQPKVDQAYQLPMLPSKMPVPVFEPFALANAVGMSSSSSHTFGVSSSTWSSMPPHTSGTASSDASTSTNSSKTSSSLLKH
>HvleckRLK82
SRRPFGSISSFSTTFVFLIMPMDNNDGVSAHGLAFALSSTMDFVFDALPGPYLGLTNMERNGNGTNQFFAVELDTIKNPQFADIDDNHIGVDVNGMESIYSHTAGYYTSNGMFSPLKLASGKPMQVWVDYDEISHTINASLAPYLELKPHRPLLSSNVNLTSVLANNSFYAGFSSSTGLLKSRHYIIGWSFNTTGKAHPLNYASMSLIIEEVRHTTQNRSRIPRAILVPVVTLPVMTALVIIVIYVLRRKARKNSEWEIETGPPSFTYKDLATATRGFNNMMLLGEGGFGKVYKGVLPTSKQNVAIKRISPESKQGMKEFISEIVTLGHLRHRNLVQLLGYSRHGNELLLVYDYMPNGSLDRFLHGQDRQALNWVHRFDIIKGIASGLFYLHEDWEKVVIHRDIKSSNVLIDNEMNSRLGDFGLARLHNHGNGTGGHITNLAGTMGYIAPELATLGRATKATDVFAFGVFMLEVACGRHPIGVSYSGEPVLLVDCVHYAWQHNSILTTVDPRLEDYIMDEVDLVLKLGLLCSHTIPTCRPSMRLVMQYLGEGAPLPDLPPILSLTRRDQGFDQHIMLSSSP
>HvleckRLK83
RTSSTMESAFKLVRLLFLVCLTLAASAAGDGDDQLVYSGFTGANLTLDGAATVTSDGLLELTNGTDQQKGHAFYPTPLRFAGGSPGGGGVRSFSASFVFAIQSVYTDLSAHGMAFVVASSNNFSSALPGQLLGLTDVQNNGNGSNHFFAVELDTIQNKEFGDLNANHAGANVNGLRSLQSYYAGYYDDGDGSFRNLSLISREAMQVWVDYDHRIAQITVTMAPLNVRRPVRPLFRATYNLTTAVTDVAYVGFSSATGTINVRHYVLGWSFAMNGPAPAIDIARLPRLPRMGPKPRSKVLDIVLPIASGAFVLALGAIVLLVLRRRFRYAELREDWEVEFGPRRFSYKDLHRATEGFSDTQLLGIGGFGRVYSGILPASRVEVAVKKVAHDSKQGIKEFISEVVSIGRLQHRNLAPLLGYCRRRGELFLVYEHMPNGSVDKYLHGREGKPILNWAQRWHIVKGIASCLVYLHEEWEKVVVHRDIKASNVLLDSDMNGRLGDFGLARLYDHDADPQTTHVVGTIGYLAPELGHTSKATPLTDVFAFGVFVLEVACGQRPVNPNLEDGQVLLVESVLEQWTKGSLLDAVDKQLGGNYNANEACVALKLGLLCSHPFANARPTMRQVTQYLDGDMPLPEMSPTDLSFQMMTIMQNEGFDQFIMTYPSSTASIDSTSVLTVGR
>HvleckRLK84
MESAFKLVRLLFLVCLTLAASAAGDGDDQLVYSGFTGANLTLDGAATVTSDGLLELTNGTDQQKGHAFYPTPLRFAGGSPGGGGVRSFSASFVFAIQSVYTDLSAHGMAFVVASSNNFSSALPGQLLGLTDVQNNGNGSNHFFAVELDTIQNKEFGDLNANHAGANVNGLRSLQSYYAGYYDDGDGSFRNLSLISREAMQVWVDYDHRIAQITVTMAPLNVRRPVRPLFRATYNLTTAVTDVAYVGFSSATGTINVRHYVLGWSFAMNGPAPAIDIARLPRLPRMGPKPRSKVLDIVLPIASGAFVLALGAIVLLVLRRRFRYAELREDWEVEFGPRRFSYKDLHRATEGFSDTQLLGIGGFGRVYSGILPASRVEVAVKKVAHDSKQGIKEFISEVVSIGRLQHRNLAPLLGYCRRRGELFLVYEHMPNGSVDKYLHGREGKPILNWAQRWHIVKGIASCLVYLHEEWEKVVVHRDIKASNVLLDSDMNGRLGDFGLARLYDHDADPQTTHVVGTIGYLAPELGHTSKATPLTDVFAFGVFVLEVACGQRPVNPNLEDGQVLLVESVLEQWTKGSLLDAVDKQLGGNYNANEACVALKLGLLCSHPFANARPTMRQVTQYLDGDMPLPEMSPTDLSFQMMTIMQNEGFDQFIMTYPSSTASIDSTSVLTVGR
>HvleckRLK85
MRGMAPREHTFFLLHAIPLLVLLPLAASTTSNDSFNFLYQGFSGVNLTLDGNAMVTPDGLLELTNDTINLGHAFYPTPLSLRGSPNGTVRSFSLSFAFAILSVHDGISADGMAFFVAPTKNLSNTWAQYMGLLNSGNNGNASNHMFAVELDTTQNEEFQDMDNNHVGIDINSLESLQAHQTGYYDDGSGSFNNLTLISGKAMQVWADYDGVSTQIDVFLAPLGFAKPVRPLLSSPYNLSTVLREPSYIGFAATTGAISTIHCVLGWSFAINGPAPAIDISKLPKLPRLGPEPRSKVLEITLPIATATFVLVVGTVIVLFLRKRFRYRELREDWEVDFGPHRFSFKDLFHATQGFKEKNLLGVGGFGKVYKGTLPKSKLKVAVKRVSHESRQGMKEFIAEVVSIGRLRHRNLVPLLGYCRRKGELLLVYDYMSNGSLNQYLYCEDGKPSLSWEERFHIIKGVAFGLFYLHEEWEKVVLHRDVKPSNVLLDSDMNARLGDFGLSRLYDHGTDPQTTHMVGTMGYLAPEFVRTGKASALTDVFAFGIFLLEVTSGQRPIKQNPFGNKHTLVDWVIERWHNGSLMDTVDQRLQGHYDVDDASLVLKLGLLCSHAFTSARPTMRQVMQYLEGDTPLPELTPAHFSFTMQVLTQNRGLESANLQYPQLSTSFATFSGLSGGR
>HvleckRLK86
MAEITPAATYAVLLVLCACCYLPPPTASLFFNYPTFSSQDQKDFSIEGDASFSVGRIDVSANKFAGGIGNSAGRVSYNAQPMLLWDKVTGEVASFTTRFSFAIVIPDINNKGKGMAFFLAGYPSVLPYDSYGFDLGLTNQSTNATASGDSRFVAVEFDTFNDTQVSDPDATYDHLGIDVNSVRSVVTKSLPSFSLMGNMTALIEYDNVSSLLSLTLWLDDGRGPKHSLNSKFDLKSALPEQVAVGFSAGTSSSVELHQLTSWYFNSSLEPKAVTVAPPVAVAPPSPGSGSGSHSSGVIAGASAGATLFLVLVIVTAVVLIRRRGSGKKKREVEEDDMGSDDEDGDPAVEIEMGSTGPRRFPYQELVDATRNFAAEEKLGQGGFGAVYRGNLKEPRLAVAIKRFSKDSSMQGKREYTSEINVISKLRHRNLVQLVGWCHGSNELLLVYELMPNRSLDIHLHGKGTFLTWPMRMKIVTGLGSALLYLHEEWEQCVVHRDIKPSNVMLDESFGAKLGDFGLARFIDHAVGTQTMTAVSGTPGYVDPQSMITGRASAESDVYSFGVLLLEVACGRRPVSLLHDPAEKNGLFRLVEWVWDRYGRGALLDGADERLNGDYDGAEVERVMVAGLWCAHPDPSARPSMRAAMAVLQSKDANQLPVLPASMPVPTYGPLVSLPSGLSSFSVTQSTSTSTSGYGTHTSTSSDVSTIGSKDSSSLLKHQYS
>HvleckRLK87
APPHAHSLSSRPPPRAKAHPTHSMGISVAVPSLLLLSAALLLPPAAAGFSFTYNFTAVSDSAPSGISFQGDAFFNKFIRLTRDERVGPLTSSAGRAFFSRPIPLFDPVSRRPASFASAFSFSISAPEPSAASGDGLAFFLSPFPSVLPNRSAGGLLGLFNSSARNGGRSLVAVEFDTYRNDWDPSDDHVGIDLGGIASVATADWPTSMKDGRTAHARVAYDAEAKNLTVALSYGDAPPTDVLLWYAVDLREHLPDSVAVGFSAATGEAAELHKVLYWDFTSSVDSKEQTVMLWVILGLCGFLVVLVGAGVVWFVKEWRKTGECVPYVDIDDAMGYDELTDEFIVQSGPRRFRYAELVAATNNFSEQRKLGQGGFGAVYRGFLKELRQEVAIKRVSKGSTQGRKEYAAEVRIISQLRHRHLVRLVGWCHEHRGDFLLVYELMPNGSVDQHLYGKGVHLTWPTRYDIALGLASALLYLHEECLQCIVHRDIKPSNVMLDATFSAKLGDFGLAKLVEHGSQPYTTVLAGTLGYLAPECLTTGKASRESDVYSFGVVALEIACGRQPSEPTAEPSKARLVPWVWELYGKKALLEAADWRLKGEFDEKQMEHLMVVGLWCAHPDYTHRPSIRQALNALKFEAPLPVLAPKMPVPTFFPLPDLAALVSSVGGAQNPGVTECESSGANAGQRSSVRDRLLEP
>HvleckRLK88
MAEITPAATYAVLLVLCACCYLPPPTASLFFNYPTFSSQDQKDFSIEGDASFSVGRIDVSANKFAGGIGNSAGRVSYNAQPMLLWDKVTGEVASFTTRFSFAIVIPDINNKGKGMAFFLAGYPSVLPYDSYGFDLGLTNQSTNATASGDSRFVAVEFDTFNDTQVSDPDATYDHLGIDVNSVRSVVTKSLPSFSLMGNMTALIEYDNVSSLLSLTLWLDDGRGPKHSLNSKFDLKSALPEQVAVGFSAGTSSSVELHQLTSWYFNSSLEPKAVTVAPPVAVAPPSPGSGSGSHSSGVIAGASAGATLFLVLVIVTAVVLIRRRGSGKKKREVEEDDMGSDDEDGDPAVEIEMGSTGPRRFPYQELVDATRNFAAEEKLGQGGFGAVYRGNLKEPRLAVAIKRFSKDSSMQGKREYTSEINVISKLRHRNLVQLVGWCHGSNELLLVYELMPNRSLDIHLHGKGTFLTWPMRMKIVTGLGSALLYLHEEWEQCVVHRDIKPSNVMLDESFGAKLGDFGLARFIDHAVGTQTMTAVSGTPGYVDPQSMITGRASAESDVYSFGVLLLEVACGRRPVSLLHDPAEKNGLFRLVEWVWDRYGRGALLDGADERLNGDYDGAEVERVMVAGLWCAHPDPSARPSMRAAMAVLQSKDANQLPVLPASMPVPTYGPLVSLPSGLSSFSVTQSTSTSTSGYGTHTSTSSDVSTIGSKDSSSLLKHQYS
>HvleckRLK89
MVASGAALCLSVVLLLAVVCCRSDVDFTYQGFQHAPNLSLDGSASVLRGGALQLTNDSERLVGHAFYGFPVALGALDDSHSGLLTVSSFSTAFVFDIVTVGTGGGHGLAFVVAPSRALPGASPEIYLGVLGPTTNGKASNHVFAVEFDTVTDLEMNETNGNHVGVDVNSLVSNVSEQAAYYTAEDNKVPVKLESAQQIQAWIDYDGGTSLLNVTVAPVSVTDRPQRPLISTKLDLRSVFKENMYVGFSSATGKLASSHYILAWSFRTNGLAQPIDLRRLPKVPRQTTPAPKVLIIKFAAVACAGTLTFVAAAMVTALWLRRRAALADKLEDWELEHPQRIPYIELYKATKGFKESGLLGSGGFGHVYKGVLGRRRSGEEVAIKRISSGTKQGMREFVAEVSSLGRMHHRNLVELRGWCKHGQDLLLVYEFMPNGSLDEHLFGGVKVLTWAQRFSVIRGVARGLLYLHEEWEHVVVHRDVKANNVLLGADMGARLGDFGLARLYEHGATAGTTRVAGTLGYMAPELTVTSRATTATDVFSFGALLLEVACGRRPVEQGEEADVILVRWVRDCGLEGDLLRAVDPRLDGLYDAAEAKLVLWLGMVCSQGRPEARPSMRQVCQFLNGEEVLPEDAVLVFSDPDSSVLLGSVLSSITFSSSCGTMSVGSLQGGR
>HvleckRLK90
MLKTLHVRFMAKVMKRAKCPLVLSFPYLLQVIWWCCLPQATSLSFDYDFSVPGVLAGADLRYMNDSAALQDRIELTNYSRSWSTGRVAYGKAVRLWDESTGKVASFTSNFAFAITPATSNSARGDGMAFFLGPYPPSMPTDARGGHLALINNRDNPANKDSPRTVAVEFDAFKNAGWDPDGTNCHIGVNVNDIRSAETTALPDGFFNGIMSASVRYDAQAATLSATLRLDDPPGQSPYTVSANVDLRNVGLPQEAAVGFSASIGDLVEKHQILSWSFQSSMTDSKTKGTSLIAGLVSSGLLILLAIAVWLGYRQYVKRKGKNIHDNIPEDADETPLDDQDMDSELEKGTAPRRFSYSELWRATRGFSDDEKLGEGGFGAVYRGFLHDRGLHVAIKRVSKMSSQGRREYIAEVTTIGRLRHRNLVQLVGWCHKADELLLIYELMTNGSLDVHLYKSRDILTWPIRYKITLGMGHALMYLHQEWEQCVVHRDIKPSNVMLDSSFDARLGDFGLARLVDHSRGAHTTMLAGTKGYMDPQCAVTSRASAETDVYSFGVVLLEIACGRRPVIQELEDESRMVLVEWVWALYGRGALLDAVDARLDGEFDAREMERTLLVGLWCVHPDYGFRPSIRQAMSVLQFEAPLPELPPEMPVALLYVLPHPHGRYGSSYTSSSTATSASTGHRRQQECHPDEADSVDNESDPRQDRACSVHAAQLS
>HvleckRLK91
KKQQQHRLTSPASNAMPLISAAFLLLLLATLAASQEFTYTGFGAGRNGGAPNLTLNGVTELQPDGIMRLTNDTSRLKGHAFYPSPLRLLGPPGSGKSNATAAAASFSTAFAFAVVPEYPRLGGHGFAFVVAPDPRLPGALPSQYLGLVSADDDGNATNHVFAVEFDTVQDFEFGDINDNHVGVDLNSLTSNASASAAPINLKSGDTVLAWVDYDGDRRLLNVTIATLAAPKKPASPLISFHVDLSVVFREQMYVGFSASTGLLASSHYLMGWSFKLGGGAAPPLDPSSLPTLPRPKPAKKSRTSLILASVFSAFVALLVLAGAGAYVAYRIKNREVIEPWELDHGPHRYKYPELKRATRGFRDRELLGCGGFGKVYRGVLPGTPPTAVAVKRVSHDSRQGLREFVAEIASIGRLRHRNLVQLQGWCRRRGDLLLVYDFMPNGSLDMHLFGDGLRAARLTWGVRYKILRNVASALLYLHEEWEHVVLHRDVKASNVLLDGDMAGRLGDFGLAKLYEHGANPATTRVVGTLGYLAPELTRTGKATTAADVFAFGALVLEVVAGRRPIEPRAAPEELVLVEWAWERYAAGEVEKVVDARLGGSFDAEEAAVAVKLGLWCSHPVPVARPTMREVARYLDSGDATEVPPPPPPPPPPPPPVCSGEVGYDDFVHSFPSSSFERAAAAGGGDPLSQTSVATFPFSPLSMRSSHVSV
>HvleckRLK92
MAGMESPWRPLLAALLLVCFGAAVLGDGDGEQFVYSGFAGANATLALDGTAVVQPSGLLELTNGTAQLTGHAVHRMPLRLRRSPGDGVRSFSASFVFGIIPPYSDLSGHGIVFFVGKDNFSAALPSQHLGLLNSFNNGNATNHIFGVELDTILNKEFNDPNDNHVGIDVNSLESVVARPAAYYDEKSGAFHDLLLISGKAMQVWVDYESESTQINVFLAPLKNGAKPSTPLVSAKRNLSEVLVEPAYAGFSSSTGTVRSRHYLLGWSFAMDGPAPPIDIGSLPKLPFVGVRPRSRVLEIVLPIATAAFVLGVVGVVILLVRRRSRYAEVREDWEVEFGPHRFSYKDLFRATEGFKGKTLLGFGGFGRVYKGVLPKSKLEVAVKKVSHESRQGIKEFVAEVVTIGRLRHRNLVQLLGYCRRKGELLLVYDYMSNGSLDKYLYGGSKDKEKPALDWAQRFRIIKGVASGLLYIHEDFEQVIIHRDIKASNVLLDADMNGRLGDFGLARLYDHGADPQTTHVVGTMGYLAPELARTGKASPLTDVFAFGAFILEVACGRRPVEQAMNDSRLMLVDWVLEHWQKETLLEVVDARLDGNYDAGEVVLALKLGLMCSHPMPGARPSMRQVMQYLEGDLPIPELTPTQMSFSMLALMQSQGFDSFVLSAASDPSSATMMTMGTITGLSGGR
>HvleckRLK93
LGPIVRRKRAAHAHYHIMKLTVLFVVLFSFHLAAGDDVQVQFAFPGFAGANLTVDGNATVTPDGLVVLNSRKTNLKGHAFYPTPLRFRGSPGGQVHSFASSFVFAIVSDYTDFSAHGMALVVCPTPESLSSALPAGYLALLNVQNNGNASNHLFAVELDTTQNTDFKDINSNHVGIDVNDLHSLQSHPTGYYLDGSGDFRNLTLFSREAMQVWVSYDGGTGQIDVTLAPLGVAKPARPLVSDTYNLSSVITEQAYIGFSSSTGGINTRHYVLGWSFAMNGPAPAIDIAKLPKLPRFGPKPRSKVLEIVLPIATAAVVLAVCTVVALLLLRHLRYAQLLEDWEIEFGPHRFSYKELYHATKGFKSKHLLGAGGFGKVYKGVLSRSKLEVAIKKISHESRQGTREFIAEVVSIGRLRNPNLVQLLGYCRRKGELLLVYEYMPNGSLDKYLYGECEGVLDWAKRFHAIKGVASGLLYIHERWEKVVIHRDIKASNVLLDGEMNGRLGDFGLARLYDHGTDPHTTHVVGTMGYLAPELVRTGKASTLTDVFAFGAFLLEITCGRRPVSNGSPGMDTDSHEMLVDWVLDHFRRGCLAETVDARLGGDCDVDEACRVLKLGLLCSHPFASTRPSMRQVMHYLDSDTPLPDLSLADMTSFSTMALLQNQGFDSYAISYPSSMGSIGTVSYISGGR
>HvleckRLK94
MKQIRLLLLHLLYVGLSLADGDDQFVYSGFGGTNLTLDGVGVTADGMLELTNGTLQRKGHAFYPAPLRFRNGTTSTFRSFSASFVFGILSDHVGLSAHGMAFVVAAGLNFSDALPSGYLGLLNVQSNGNASNRLVAVELDTMQNDEFGDINDNHVGIDVNSLSSVQSYYAGYYDDGSVNGDFRNLTLISGEAMQVLVEYDGEATQMNVTVAPLNVAKPTRPLVSARHDLSKVLTDVAYVGFSAATGGTLRSRHYVLGWSFGLNRPAPAIDISKLPRLPRVGSNDRSRALTIALPIATATFLLAGAAAIFVLVRRHRRYAELLEEWEVEFGPHRFSYKDLFRATEGFKSDHLLGIGGFGRVYKGVLPLSKSEIAVKRVSHDSKQGMKEFIAEVVSLGRLQHRNLVQLLGYCRRKGELLLVYDNMCNGSLDKYLHASDDRLLVLDWATRFRIIKGIASGLVYLHHEWEKVVIHRDIKASNVLLDNEMKGRLGDFGLARLYDHGAGADPQTTRVVGTLGYIAPELGRNGKASPGTDVFAFGVFMLRLRVGSGLSVMKEQTIRPCWLIGCFTTGKMGPFWTRWMLGSTATMVRMRPVWC
>HvleckRLK95
MKDLPPTCHLLSFSLQVTSMLAMKHTSFLQQFLLLFGLIIATLASGDDQFIFYGFNQSSLTLDGSGVVTESGLLDLSNGRSGLNGHAFYPTPLHFRKSLGGKVQSFSVNVVFSIFIMYPDLSADGMAFFIAPTKNFSDARAAKYFGVLNEKNNGNTSEHIFMIELDTYKNAEIQDIDDNHIGININSAVSSESTTAGFYEDEGGAFNNMTLNGNKAMQLWVDYDEGDTQINVTLAPINMGKPSRPLLSATYDLSTVLSDSAQYIGFSSVATPINTRDYVMGWSFGMNRPAPSIDISKLPKLPLVGPQAQSKLLEIILPVATATLILSMGTLVTLVMRRRIKYAEVREDWEGEFGPHRFSYKDLFHATGGFKNKHLLGEGGFGKVYKGVLPLSNVEIAVKRMSHESRQGMKEFVTEVVSIGQLRHRNLVQLLGYCRRKGELFLVYNYMPNGSLDKYLHSEVQTAILNWVQRFRVIKGIATGLLYLHEKWEKIVIHRDIKASNVLLDSEMNGRLGDFGLARLYDHGTDPQTTHMVGTKGT
>HvleckRLK96
FTRRLLPHPAPRGRSANARSLPLLAPVVAMPIDLAALVWLLLFLALDVAGAQEFVYAGFAVGSVATTGAAAVLAPSGILRLTNDTKEAFGHGFHQAPLRFRDASTGAPVSFSTTFVVAIAPRYPDAHGHGIAFALAPSVAVPGAVAGKYLGLFNTSDSLGNGTSLIVAVELDTAMDAEFHDADENHVGIDVNGLHSVNSTPAGYWHDDGFGGTKFDNISLTGGGDAPLQVWIEYDGERARLEVTVSPAGAPRPAVPLVSCNVNLSRAVAEDSYVGFSAANGAAASSHYVLGWSFRLGGGRAQDLDLSKLPRLPSSTSSSSSKRTMPPLLLPMTLLVLVVVILLLASAAVAALVVRRRRQFAEEEEDWEVEYGPHRISYKDLHGATNGFRDLIGAGGFGRVYHGVLRRSGAEVAVKVVSHGSRQGLQEFVSEIVSMSRLRHRNLVQLLHYCRRRGELLLVYDYMPNGSLDQHLFGHPSSELSWEQRAKVVRGVAAGLLYLHEGWEQVVVHRDIKSGNVLLDADMNGKLSDFGLARLYDHGGDPQTTRVVGTLGYIAPEMSKTGKATTSSDVFAFGAFLLEVACGRRPVVFSNESDDSPPSPGLVELVLEHWKAGRITEARDLRMGKCDQEDLELVLKLGLLCSHPDPLRRPGMRQVVQMLEGAAPAPETSPEDLGNSMTLFEHSEAFDGFVRVSFPSTSGFTTATIRTSTSNSPDEKRQLLFS
>HvleckRLK97
MLLRRLAAVIFLLLFSRHVAGDQEFMYPGFAAGSVATDGTAVITPSRILQLTNDTKEVFGHGFHPAPLRFRDASTGAPVSFSTTFVFAIAPRYPDTHGHGIAFALAPSVIIPGAVAGKYLGLFNTSNSLGDGTSQIVAVELDTVMDLEFHDVDENHVGVDVNSLHSNSSTTAGYWHDDGFGGRRFDNISLIGGSDAPVQVWIEYDGGSTRLEVTVSPAGEPRPARPLLSCHVNLSSAVAEDTYVGFSAANGAAMSSHYVLGWSFRLGGGRAPDLDLSKLPRPPSPPGSSKRRMSLPLILILLLLSVLVLLLVSAAIATFVVRRQRWHRQRQEFSEEEEGWEMIDYSPHRISYKDLHDATNGFRDVIGVGGFGRVYHGVLPRSGVEVAVKKVSHGSQQGLQEFLSEITSMSRLRHRNLVQLLGYCRRRDELVLVYDYMPNGSLDQHLFGVGRAAPGLSWEQRAKIVRGVAAGLLYLHEGWEQVVVHRDIKSGNVLLDADMNGKLSDFGFARLYDHGGDPHATHVVGTLGYIAPEMSKTGMATTSSDVFAFGAFLLEVACGRRPVVFTVDPDGESPSPAGIVELVLQRWKAGKITEARDPRIGECDVDDLELVLKLGLLCSHPDPERRPGMRQVVQMLERAVPAPEMSPEDIGKSMKTFEYNEAFDEFVGMSFPLTSEVTTATTLPSSSSHYSDTPPTTNGSRPHSGFH
>HvleckRLK98
MYATTSAWLDRETRSEVTTMSANKLALILVVGLLINLVARTAGDDGHQFVYSGFAGSSFLLDGAASVTGSGLLELTNGTLRLKGHAIYRTPLRLRGRSFSSSFVFGILSAYPDVSANGIALFVAPTTNLSGAMAAQYIGLLNSSNNGNATNHVFAVELDTMQNNEFRDLSDNHVGIDVNSLVSVNSTDAGYYPDDGNGEFRNLTLISHEAMQVWVDYEGGTGRINVTLAPLNLKTGSRPARPLLSVVHDLSAVIPDTAYIGFSSSTGLVSSRHYILGWSFAVGGPAPAIDVARLPKLPRDFQKPRSKAMEVILPIATAALVLLTGTALVLLRRRQLRYSELREDWEVEFGPHRFSYKDLFRATEGFKNKNLLGVGGFGKVYRGALPASKCQIAVKRVSHSSKQGMKEFVAEIVSIGRMQHPNLVQLLGYCRRKGELLLVYEYMSNGSLDKYLHPQPQDGDKQNGATLNWAHRLGIIKGIASGLIYLHEEWEKVVVHRDIKASNVLLDAGMNGRLGDFGLAMLYDHTADPETSHVVGTIGYLAPEIGRTSKATILTDVFAFGIFVLEVICGKKPIMQDSKDDQLMLADWVVGHWSRGSLVEAVDTRLQGEYDDDEACVVLKVGLLCSHPFPEARPAMRQVLQYLNGDMPVPELVPAHLSLQMLAFMQNEGFDSYIMSYPSSVESVNSFTSLVQQRHGEGISPDDEFVPEEGIR
>HvleckRLK99
MAMMHMFFLLILFLSAGVILPLPPVVAAADADGEQFVYTGFTGSNLVLDGAATITATGLVELTNATTHQKGHAFHPAPLRLRGSPDGTGTVRSFSVAFVCGIVSSYTDFSTHGLALVIAPGVRSLSAGLTDQYFGVTNAQNDGSAANHLFAVELDTVQNIEFRDINNNHVGVDINGLTSVVSHEAGYYDDRNGGGFQNVSLISRAAMQFWVDYDRVTTQIDVTMAPLWMARPSKPLLSTTQNLSTVLAVEPSYIGFSSSTGPVNTRHYVLGWSLGIDGPAPAIDAAKLPKLPQLGPKPRSRVLEITLPIASAVVVLAVGIALVLLVRRRLRYTEVREDWEMEFGPHRFAYKDLFQATKGFKDKHLLGAGGFGMVYKGVLPASGVEIAVKKVSHGSKQGVKEFVAEIVSIGRIKHRNLVQLLGYCRRKDELILVYDYMPNGSLDKYLYGHGDGDGMTLDWAQRLHVIKGVACGLHYLHERWEKVVIHRDVKTSNVLLDKEMNGRLGDFGLAKLYEHGTNPQTTRVVGTTGYLAPELVRTGKATPLTDAFAFGTFMLEVACGRRPIKQDKQGNQILLADWVLDHLHRESLIEAADPRLQHEYNSDEVCLILKIGLLCSHPSPSARPMMQQVLQYLDGELPLPEMTRTTLSFNLLALKERKELQSMSSPFSSTAMTVGTISDLSGGR
>HvleckRLK100
TSAASVILREESSSTPAEHTGSAVTYYTTLSPLMSVMKLICFFLLGAVGALELVSSVDDQFVYSGFAGAGLTLDGSATVTPSGLLELTNGTLQLKGHAFHPAPLRFRELPNGTVRSFSASFVFGILSAYPDMSAHGIVFVVAPTTDFSTALASQYLGLVNVQNNGHESNRIFAVELDTLQQDEFRDINDNHVGVDINGLISLQSSNAGYYVTGGEKKERFENLTLISHQAMQVWIEYDAGSNRINVTLAPLGVAKPAKPLMSVTYNLSSVIASTAYVGFSSATGSFDSRHYVLGWSFRMSSTSAPAMDMAKLPTLPREIPKARSKVLQVVLPITSAAVVLALGTVIVLLLRRRRRYTELREDWEIEFGPHRFPFKDLHRATQGFNSKNLLGVGGFGRVYRGVLPDCNMDIAVKRVSHDSKQGVKEFIAEVVSLGRLQHRNLVRLLGYCRRKGELLLVYEYMPKGSLDKHLYLYGHQDDDKPTLNWAQRFHIIQGIASGLLYLHEEWEKVVVHRDIKASNVLLDDKMNGRLGDFGLARLYDHGTDPQSTHVVGTIGYIAPELGRTSKASPLTDVFAFGTFLLEVTCGRRPIFQDARGNQVMLVDWVLDHWRRDSLAHAVDTKLRGDYNVDEACLVLQLGLSCSHPFVNARPNMRQVMQYLSNEVPLPQLRSTKMSFQTLAMMQNDGFDSYIQSSYSSSRASFSTTSVIS
>HvleckRLK101
MSSLVLLLTIPLGLNLAALITTANDQFIYSGFSGSNLAVDDTATVTPDGLLELTNGTAYQKGHAFHPAPFRLRDSTASGNGKVRSFSVAFVFGIVSVYPDFSAHGMAFVMAPRRNFSDALPAKYLGLTNVHNDGNASNNIFAVELDTIQSVEFKDINANHVGIDINGLQSLRSYNAGYYDDKSGEFRSMKLISREAMQVWIDYHGERKEINVTLAPFDMAKPARPLLSASYDLSTVLTELVYLGFSAATGRVNSRHFVLGWSLGVSTEAPAIDMAKLPKLPRVGPKPRSKVFDIVLPIVTATFVLGLGGIIILVMRRRSRYTELREDWEVEFGPHRFLYKDLFRATEGFKDKHLLGAGGFGRVYRGVLETSKLEVAVKRVSHESRQGMREFIAEITSIGRIRHRNLVELLGYCRRKGELLLVYAYMPNGSLDKHLYNTREGQPTLNWALRFQIVNDVASGLLYLHQRWEKVVIHRDIKASNVLLDKDMNGQLGDFGLARLYDHGADSQTTHVVGTMGYLAPELIRTGRVSPLTDMFAFGIFLLEVACGQKPIKENAQGGQIALVDWVLEHWRDGTLMETVDARLQGGFDIHQAGLVLTLGLMCSHPLASARPAIGQVMRYLAGVTPLPELTPTDVLTLMQNKGFDESAMSYPDLVSSFGTISTLSGGR
>HvleckRLK102
MSVLHLLLILALHVLPLASPAVDVDQFTFDSFAGANLSLDGTAMVTPDGLLMLTNGTTQLKGHAFYPSPVRFHDAANGDASSSRSFSTAFVFGILSEYDDLSSPGLAFVVSKGKNFSTALQSQYMGLANAANNGNASNHFLAVELDTIVNAEFGDMSGNHVGVDVDGLSSIVADNAGYYEDGTGAFINMSLLNRTAAQVWVDFDARTSLVSVTMAPLELPKPKKPLLSATVNLSSVIQDKAYIGFSSSTGVVSSRHYVLAWSFKMDGGQAPPLNIQKLPALPFTIPKRRSKMLYILLPIASAALVLALAIAVVVIDRRRRRYAELKEDWETEFGPHRFSYKDLFHAAKGFSDERLLGIGGFGRVYKGVLPTSGAEVAVKKVSHESRQGMEEFISEVVSIGQIRHRNLVRLLGYCRRKRELLLVYEYMPNGSLDKFLYDHNTMVLSWSQRLGIINDVASSVLYLHEDWEQVVLHRDIKASNVLLDADMNGRLGDFGLARLYDHGTDPHTTHVVGTMGYLAPELGHTGRASKASDIFAFGVFMLEVACGRRPISISQDEHGDHLLLADSVIEHWRQGTITDAVDPRLRGDFPVEEARFVLKLCLLCSHPLPNARPGIRQIMQFLSGYTRLPEVSVEHLSVDVLALKQNQVVRSHSSLPSTEAGNMSDIPGAR
>HvleckRLK103
PLTTHQPAASLFVQMHAHHDSLHFSTTWPAHISPLFLSSPPLLRKRGLKPMAHSRRRQRATTSLAVLLLLYAISVCSLLPAARAQATTFTSIVGGKESITFSFPSFDNSLRQLPGNLTVLGNATVNGNALQITPDTRNDPERFLINQTGRVMFPRAYVLWASDASNSSADGRRVASFSTVFKVNLFRANASVKGEGLAFLIASDGAAPPPPGSHGGYLGLTNASTDGSAANGFAAVELDTVKQAYDPDDNHVGLDVNGVQSKVAASLTPFGIDLATNNTDDDGSHMVWIEYNGTSRHVWVYMAKNGSRPATPVLNASLDLSRVLLGKTAYFGFSASTGVLYQLNCLHSWDMTVELLPDGSGTGKQPLSGWKLGLAIGAPCAFALALGLFAGLYIKSRRRRIGDDSSSMVRSTINFASIPGVPKEFDYKELRKGTGNFDEKMKLGQGGYGVVYRATVVGEHGQNMEVAVKQFSGANTKGQEDFLAELSIINLLRHRNLVKLLGWCHQDGVLLLVYDFMPNGSLDRHLFGGPEAPVLTWGQRYNIVAGVASALNYLHHEYDQRVIHRDIKPSNIMLDGAFNARLGDFGLARALETDKTSYTDKIGVPGTLGYIAPECFHTGRATRESDVFGFGAVILEIVSGRRISCSNAAGCSQLLEGVWQLHGAGGGRILEAVDRRLVAGGFDEGDAERLLLLGLACSHPNPGERPRARAIVQILARSAPPPDVPAAKPAFMWPALPVVLGDDDGETPVSGTSTALTSSSSYYASSAGWTTQNYLLTREHDVTDRDMSTA
>HvleckRLK104
FLSSSTFLATNSFPAMTNMKRASFLPPLLLLPLFGLAVATFAAGDDRFIFSGFTQSSLALDGSVVVTQGGLLDMSNGTNNVKSHALYPAPLHFRNSSDGKVQSFSAAIVFCIVGAYPGVSANGMAFFIAPSKNFSDALLTQYFGILKPNNNDNLFVIEIDTFQNPDIQDINDNHIGIDINSALSLQSHAAGFYEDSNGAFKNLTLNAQIELQLWVDYEEEGTRINVTLAPLHVGKPSRPLLSATYDLSTVLTDTAYIGFSSTAEIMNTRHYVLGWSFGMNRQAAPSIDISKLPKVPRLRQKAQSKLLAIILPIATAALIISIGTVVILTVRRRWRYMEVREDWESEFGPHRFSYKDLFHATQGFKSMNLVGAGGFGEVYKGVLKLSKKEIAVKRMSHESRQGMKEFITEVVSIGKLRHRNLVQLLGYCRRKGELMLVYDYMSNGSLDRLIHHQEDGKSTLNWAQRFQVIKGIATGLLYLHEKWEKVVVHRDIKASNVLLDDEMNGRLGDFGLARLYDHGADPQSTHMVGTMGYLAPELVRTGKASPRTDVYAFGMFLLEVTCGQKPMKQDAEGNQVFLVDWVLEHWNNRMLSKTVDARLQGDYGVDEACLVQKIGLLCLHPFPGSRPSMREVVQYLDGETPLPELKTTQLSVDMQGLMQDNGFSTTVMSYPQLMSSFGAVSDLSGGR
>HvleckRLK105
MDMGNHLLLLLIVVVNLHAFMHTANCDELIFNGFSEANLKLSGQASMVGRAIRLTGGITLTEGDAFYSRPLDFSSNSSGGGTSFSTTFVFAINSDTIENPSGAPGMAFVLSSTMELQHLHNNSVVQGQLGFSDVGGNSSNSGDQFSFTIELTYINDHLVEIDVKSLVSVNHTTSSNRASRASNMFESTKLSSAKPMQVWIHYNGTEQMLNVTLEEFDDHVERSKPLSLPQLSSTVNFPPLLSNSEHVYAGFSAANGKTYCSRYVIGWSFMKNGQAPPLNPLNLPQVLPNPQHQKKHILLIVSLVTLVPIVFVLVLIFSYDIRSWLKTNLAHEKWEIDCGMLQSFTYKDLFIATSGFNKKAFLGKGGFGKVYKGVLAVPEQTIAIKRVSPESKQGMKEFMAEIAILGHLRHRNLVQLIGYCRHRQELLLVYDYMPNGSLDMYLHKKDKPTLDWAQRLHIIKGVAAGLVYLHDDWEQVVIHRDIKVSNVLLDDGMNGRLGDFGLARLHGHEADAHTTRVAGTWGYIAPELARLGKATKATDVYAFGIFLMEVACGRGPLEANAHGEPLVLADWVFNRWQTGSLIDAMDTRLEQGHVTEEVELVLKLGLLCSHSLPKERPCMRLVMQYLESDATLPDFPPCFFTANSNKDEGSEDQVVAPPSAATSITGLSGGR
>HvleckRLK106
MAGSMKLSTLPILLLLITCLPSSATGSQDQESFLYTGFAGSNITLDGAATITPAGLVKLTNESFRIKGHAFHPAPVRFREAPNGTVRSFSVSFVFGILSSFGDIRGHGFAFFIAPTTDLSAAFPIQFLGLVNATNNGSATNHLFAVELDTIQNTEFGDIDNNHVGIDINSLNSVESNTAGFYNDDSSSREDDGMLTNMSLIGSGPIQVWVEYHGESTRINVTLAPLGVAKPARPLLSTVYDLSGVLTDQAYLGFSSSTGLSTGHHYVLGWSFGMGTPAPVIDPTKLPKLPYLGPRPQSKLLEIVLPIASAVFVLAVGILAITMVRRHIRYKEVREDWEVEYGPHRFSYKDLFRATKGFKDKNLIGAGGFGRVYKGVLPKSKSQVAVKRVSYDSKQGVKEFVAEVVSIGHLQHRNVVQLLGYCRRKGELLLVYDYMENGSLDNHLYGQLQGKATYLGWRQRFRIIKEIALGLLYLHEDWDKVVLHRDVKASNVLLDKNMNGRLGDFGLARLYDHGTDPQTTHVVGTIGYLAPELVHRGKATTLTDVFAFGIFVLEVTCGQRPIKEDPQGNQLVLVDWVLQNWHKGSLADVVDAKLQGGYDAGEACLALKLGLLCSHPFPQARPSMRQAMQYLDGDVPLPELLPEHFSFHMLALMKNESKVYSSAMPSYPSPMMTSFGSISDFSIHGR
>HvleckRLK107
MEHPPTLRFSLQLQIFLSFVLSLAFLTTTTTTITQGQEEEEDQFVYSGFSGGGGTGLGLTLDGTATVTPDGVLKLTNGTLHLKGHAFYPTPCRFRKSPNGAVQSFSVTFVFCMVPVYSDQCTDGMTFLISPTKDFSGAQHSQYLGLLNKTTDGKPSNQIFAVELDSSQNTEFDDIDDNHVGIDINSLTSTQVRPAGFYDDKKGGAFNNLTLVSRKEMQVWVDYDADTTKITVTLAPLKVAKPSRPLVSTTYNLSTVLRDKSYLGFSASTGPINSLYCVLGWSLGINRAAPDIDMTKLPKLPRIGPKPRPKAMEIVLPIASATFIFLVGTSIVLLVRRRRKYAELHEDWEDEYGPHRFSYKDLFHATQGFHNKNLLGHGGFGKVYKGVLPVSKLEVAVKRVSHESKQGIKEFIAEIVSIGRIRHRNIVQLLGYCRRKGELLLVYEYMSNGSLDRYLYVQEEEDAPTLDWGRRFEIIKGVASGLFYLHERWEKVVVHRDIKASNVLVDGEMNGRLGDFGLSRLYEHGTDPQTTRVVGTMGYFAPELARTGKATPLTDVYAFGIFILEVTCGRRPIVDKGVEEDDGSEILVDWVVEHCRKGSLMETVDMRLRGSSSDPDEVCLALKIGLLCAHPFGNVRPSMRQVMKYLDGETPVPELMPTTLSYSMMGVLQNDGFSDYASLSATVSSXXXXXXXXXXX
>HvleckRLK108
LDTSDSLSPKEEPRSSVKCQIKRRCVCCGTASLQQIDAEAMLLEHFHLATLFLLLVTTAGGVGGQKFTYNGFAGSNLDLDGVAGVTPNGLLMLTNGPIQMKGHAFHPSPLPFRAARSFSTTFVFSIFGQYIDLSAPGLAFVVTTSKEMHATALPGQFLGLLNTTNNTNPNAHFFAVELDTLLNVDFRDINSNHVGINVDSLVSRAAADAGYYDDATGRFQNLSLISRKAMQVWVDYDGAATEITVTMAPLGLARPSKPLLRTTVDLSTVLQHQDTAYVGFSSATAVLFARHFIVGWSFALDGPAPTLDISSLPALPPTGPKPRSRVLEIVLPIASATVVLAVGIAVYIFVRRRLRYAEVREDWESAFGPQPFSYKDLYQATKGFSDTNLLGAGGFGSVYKGVLRKPDMDTEVAVKRVSHQSRQGMKEFIAEVASMRRLHHRNLVQLLGYCRRKGELLLVYDHMPNGSLDKYLHDPMPGKGMLEWAQRFHIIRGVASGLSYLHEDWEQIVIHRDVKASNVLLDGEMNGRLGDFGLARLHDHGSDAQTTHVVGTMGYLAPELGHTGRATPSTDVFAFGAFLLEVTCGRRPIEQDERNNRVMLVDWVAEQWRKGSITKAADVRMPNSFCLDQVSLVLKLGILCCHPLHNARPTMRQVVQYLDGDLPLPEFSPVYLGSTMLELMYSAEFFNKNLMTYVSSGVISDLSTGR
>HvleckRLK109
MPALLLLILLLLLSRDGEVASSSDGGQFSYQGFAGANLTLDGLAVVMPSGLLALTNFTQQTKAHAFHPAPLRFLNNNNTAVSFSTSFVFAIVSGYDGLSDHGFAFVVAPTTNFTTAGAGQYLGLLNTTNGTPSAPILAVELDTIVNPEFQDINSNHVGIDVNSLVSRQARPAGYYDDDRGGALQGLTLNSRKPMQVWVDYDGQAKQLEVTLAPVHVPKPRKPLLSEAIDLSTLMADAMYVGFSASSGVVSAHHYLLGWSFSLGGSAPPLDFSKLPALPRLGPKPRSKVLDIVLPLASALLVATALAAVFFFLWRRRRFAEVREGWEDEFGPHRYAYKDLHRATHGFTERNLLGVGGFGRVYKGRLSASNLEIAVKRVSHESRQGLREFVAEVASIGRLRHRNLVQLLGYCRRKDELLLVYDYMSNGSLDKHLHDPNMPTVTWPERFSIIKGVASGVLYLHQDWEKVVIHRDIKASNVLLDENMNGCLGDFGLARLYDHGTVAQTTRVVGTMGYLAPELVRTGRATPLTDVFAFGVFLLEVACGQRPIERAQRDSRVVMIDWVLEHHRSGSLLQAVDPRLAGKFDTEEVTLVLQLGLLCSHPLPDARPSMRKVTQYLDRGQSVPDLSPTYMSYSMLVMMQNEGFDSYVMSYAPSEPSCTTVSYGSSMTVLAEGR
>HvleckRLK110
MEHQSTLGFSLQLHILLSLALSLASFTTVTATSEEEGQFVYSGFSGSTDLTLDGTATVTPDGVLKLTNGTVHLKGHAFYPTPWQFSKSPNGVVQSFSIIFVFGMVPVYSDQCTDGMTFFISPTKDFSGAQTSQYLGLLNITNDGKSSNHIFAVELDSSQNTEFKDIDDNHVGININSLTSTEARPAGFYDDKNNGVFNSLSLVSRKEMQVWVDYDGDTTQINVTLAPLKVAKPLMPLVSTTKNLSTVLQDQSYVGFSASTGPIDSLYCVLGWSLGINRPAPDIDITKLPKLPRIGPKPQSKVLEIVLPIATAIFIFLVGTTIILLVRRRMRYAELHEDWEDEYGPHRFSYKDLFHATQGFHDANLLGRGGFGKVYKGVLPVSKLEVAVKRVSHESKQGIKEFIAEIVSIGRIRHRNIVQLLGYCRRKGELLLVYDYMSNGSLDKYLYLQEEEEHKPTLDWARRFEIIKGVASGLFYLHERWEKVVIHRDIKASNVLLDSEMNGRLGDFGLSRLYDHGTDPQTTRVVGTMGYFAPELARTGKATPLTDVYAFGIFILEVTCGRRPIIDSNQAEEVGSDILIDWVVEHWSKGSLADTLDMRLQGSNCNLDEVCLALKLGLLCAHPFGNVRPSMRQVMQYLDGEMLLPELMPTNVSYSMMAVMQNDGFSQYTSLTDTVSSNGVTSSLSTGR
>HvleckRLK111
QKKIASPKKKYHQRLLFAPSPTVTFKRANPTVTHKKHTTNPSLPEHLLCSHCPVGIPKLIAAIILPQATRTARSTKSHDPNTARPPPPMAADLLLLRLVPLLLLLLAASLVPPASSSAGKNSSVSIDSATLSFSDLTLLGDAFLRNGSVGLTRDTGVPSSSAGTVLCTRPVALRGNGSSNNATASFAARFSFVVANQNAGSTGGDGIAFFISSDRATLGATGGYLGLFNSSLADAAVPNDDDADAVGPAIIAVEFDTMVNSELGDPSDNHVGLDLGSPVSVSAVDLVDSGIVLKSGNLTTAWIDYRGAEHLLEVSLSYSGVKPKRAVFSVAVDLSPYLREAMYVGFSASTEGSTQQHTIKEWTFQTFGLPPATNASTFTNATSNVSEPAVPGVAAASGGATSKKRFGRAITILGPVALAVAFVFFACVSVKKLAELTSRKDAIFLPGLLKGPRKFSHKELSVATRGFHASRVIGRGAFGTVYKAAMPGAATTYAVKRSTQAHQSRSEFVAELSVIACLRHKNLVQLEGWCDEKGELLLVYEYMPNGSLDKALYGDPCTLSWPERHNVAAGIASVLSYLHQECEQRVIHRDIKTGNILLDGNLSPRLGDFGLARLMDHNKSPVSTLTAGTMGYLAPEYLQSGKATDQTDVFSYGVVVLEVCCGRRPIDREETDKDSKNVNLVDWVWRLHGEDRLIEAADARLNGEFDREGMLRLLLVGLSCANPNCEERPAMRRVVQILNREADPVPVPRKKPLLVFSSSASIKLQEMAFSCGDDVRGGYPAAATTTANPASPRSEGAGIER
>HvleckRLK112
MTAAIQYDNISSIMSVTLWLGDDHGPSYSLSSKVDLKSALPELVAVGFSASTGKSFELHQLLSWHFNSSLQGKTATVVAPPVLPPPSSRTSSSGVVAGAVAGASLFLVVFFSMSAILLRRRHNKKKREAKEEMDSEDEMIMEMEFGTGARRFPYRQLTNATRNFAAEEKLGQGGFGAVYRGHLRELGLDVAIKRFSKESSMQGRKEYMSEINVISRLRHRNLVQLVGWCHNHDELLLVYELMPNRSLDIHLHGKGTFLTWAMRMKIVLELGSALLYLHEEWEQCVVHRDIKPSNVMLDESFCAKLGDFGLARLIDHSVGMQTMTIVSGTPGYMDPQCLITGRASSESDVYSFGVVLLEVACGKRPMSTSANKQGVSRLTEWVWNLYGQGGVLEAVDERLNGHYDEAEVERVMAVGLWCAHPDPSARPSIRTAMATLQSKDAKQPPMLPAKMPVPTYAPPMAPWDGQSSSSGLSASTVTRSSTTSGYTGPAPMVTPRA
>HvleckRLK113
MRSRATGTCFMALQFVLFFTFNIAGVSPLSFKLNFTESNYTASTAIKFQEDAFYNKGIKLTKDQLKDQITNSVGRAVYTDPVLLWDTATGQLADFSTRFTFRITATNTSATDDPYGEGLAFFLSPYPSVVPNRSTGGFLGLFSNGSDQNDPSNELVAVEFDSHDDTWDPKGNHVGIDIHSIVSVAHVVWNSSINDGRIANAWVSYKASSLTLSVFLTYLGDPQFSGNSSLSYSVDLRKYLPGKVAIGFAAATGRFVELHEILFWEFNSTDLQLMKTEKMRSVLVISLATTISVVVCSMCLVWCLLHFRTRRSRNEKQKKLGYHESIDGEFEKGSGPRRFRYNELVAATRNFALERKLGEGGFGAVYQGLLKDQNLDVAIKRVAKGSTQGRKEYISEVKIISRLRHRNLVQLEGWCHEHGEFLLVYEFMPNRSLDTHLYDNSNLLTWPLRFKVTAGVASALLYLHEEWEQCVIHRDIKPSNVMLDSVFNAKLGDFGLARLIDHDRASQTTVLAGTMGYMAPECVTTGKASKESDVYSFGILALEIACGRRPVVLKEDDDKVILVQWVWDLYGRNKILNAVDSRLDGAFEDRDAACLMVVGLWCAHPDYNLRPSIRQVISVLKFEAPLPILPPKMPVAMYFAPPISLCRFSYTSSDGTLKQQELERSNGYGKTSSSTTTNASSSPPSVRLPEVGY
>HvleckRLK1
MDGPALSCYTAALIILFLPLRASEDRLLAGERLSPGTTIVSDNGAFALGFFNPSNSTPASLYLGVWYNGIPELTVVWVANREAPVINGNSSVPTLSLTNTSNLVLSDGSSGLVVWTSDVAAAPSSVAAVAVLENTGNLVVRSPNGTTLWQSFEHVTDTFLPEMKIRIRYATRGTGIRLVSWKGPSDPSPGRFSYGGDPDTLLQIFLWDGELPLVRSGPWTGYLVKGEHQYQQANGSGSIIIYLAIVDNDEEIYMTYTVSAGAPLTRYVVTYFGDYELQSWNSNSSTWSILFKLPPYECNRYGSCGPFGYCDETVRPVPMCKCLDGFEPTSANEWRFGRYSAGCRRKEALHGCGDGFLALTEMRVPDKFTFAGGNKSKMEECAAECSNNCSCVAYAFTNLSSGRSGGDVTKCLVWAGELIDTGKLGQGIGSTTLYLRLAGLDVAAGKSRKSTATMIILAIFGTGVVAFLCIFVAWLKFKGKKKWRKHKKATFDGMNTSYELGEGNPPHAHEFPFVSFEEISLATNNFSETCKIGQGGFGKVYKGLLGGQEVAIKRLSSDSQQGTKEFRNEVILIAKLQHRNLVRLLGCCGEGDEKLLIYEYLPNKSLDATLFDDSRRLMLDWTTRFNIIKGVARGLLYLHQDSRLTIIHRDLKAGNVLLDVEMKPKIADFGMARIFGDNQQNANTQRVVGTYGYMAPEYAMEGVFSTKSDVYSFGVLVLEVVTGIKRSSNSQIMGFPSLIVYSWNMWKEGKTEELVDSYTTDTCSLDEILICIHVALLCVQDNPDDRPLMSSVVFILENGSTTLPPPTCPAYFTRRSAEMEQMRDDIQNSRTSFTLTEIDGR
>HvleckRLK2
XXXXXXXXXXXXXXXXXXXXXXXXXXXXXXXXXXXXXXXXXXXXXXXXXXXXXXXXXXXXXXXXXXXXXXXXXXXXXXXXXXXXXXXXXXXXXXXAGAPTLALANDSSLVMSDADGRVLWNTTGVGSSSSQTAPAELGNDGNLLIQLPDGTVGWQSFDHPTDTFLPGMKVRVSHRTGKGDRIVSWRSPDDPAPGRFSYGLDPGTSLQLLMWNGTRPYWRSPVWKGYAVATMYVSAGTVIYTAIVDTDEEISLAFSVSGGAAPTRYVVTSSGKFQLLIWNGTRSAWATLQSWPSSECTTYRHCGAYAYCDTTAAPATCRCLDGFEPAKPAEWTSGRFGQGCRRKEALPPCGGGGGGNGVGFIAMPSMKVPDKFSLDAGNRSAEECAARCAGNCSCVAYAYANLQSSSAKGDVSRCIVWAGELVDAQMIDPRWGGETLYLRVPAAAASTSPGGKASRNAVKIAVPVVASALLLTCIFFVWFCRYRDKRRKTESQKKLMPGIRTGTTNTSSEIGEGDRTGDLEFPSIGFGDIVAATDNFSKTLMIGRGGFGKVYKGTLDGGHVVAVKRLSKDSDQGAEEFKNEAILIAKLQHRNLVRLLGCCTEGGEKLLIYEYLPNKGLDAILFDSGRKSVLDWPTRLGIIKGVARGLLYLHQDSRLTVIHRDLKASNVLLDAEMRPKIADFGMAKIFGDNQVKANTRKVVGTYGYIAPEYSTEGVFSDKSDVYSFGVLLLEIVSGIRVSATEGIMEFPSLISYAWHLWREGKAGKLVDPSMAGSCSQDEASLCIHVGLLCVEDDPSRRPLMSSVVSILENGSASALSLPTPVQPAFVEMMGEKSQRSDLENTRNTMAMTVLQGR
>HvleckRLK3
MPLLYILVLGLLLSRTPRCSSSSTPASDTLTEGQVLAVGEKLVSTNGKYALGFFQPATSTISKSQNTTSSSSSSSSSWYLGIWFNKIPVFTVVWVANREQPIPHSNINSTKLKFSRDGNLVIVTNRADAVSESLVWSTHIVNSTQTSSINTTTSGAAVLLNSGNLALLTNSKAMLWQSFDYPTDIALSGAKLGWNKVTGFSRKFISRKSLIDMGLGSYSLELDTSGVAILKRRINPSVVYWHWASSKTSSLSVLPTLKTIIDLDPRTKGLMNPIYVDNDQEEYYMYTSPEESSSSLFVSLDISGQVKLNVWSEANLSWQTICAEPADACTPAATCGPFTVCNGNAQPSCDCMEGFSRKSPQDWEFDDRTGGCIRNTPFNCSTRGNNKNMTSSTDIFHPISQVALPYNPQSIDVATTQSKCEEACLSSCSCTAYSYNNSRCYVWHGELLSVNLNDGIDNNSKDALYLRLAATAKFEKKKKQTNIRFVAAASIIGFGLLVLMLLALIWRNKFKPLYNNQVSGGGIMAFRYTDLVRATKNFSEKLGGGGFGSVYKGVLNGSTSIAVKRLDGARQGEKQFRAEVSSIGLIQHINIVKLIGFCCEGDHRLLVYEHMLNGSLDGHLFEKSNAAVAVLNWNTRYQIALGVAKGLSYLHQGCHKCIIHCDIKPGNILVDASFVPKIADFGLAAFVGRDFSRVLTTFRGTAGYLAPEWLSGVAVTPKIDVYGFGMVLLEIISGRRNSSIETPYNTSDSSSYQNVEYFPVQAISKLHSGDVKSLVDPQLHGDFNLEEAERVCKVACWCIQDNEFDRPTMGVVVRVLEGLQKIDMPPMPRLLAALTV
>HvleckRLK4
TSTLLSMHPLHILLLGILLLPTSCCSSSAPADDTLVAGRVLTVGDKLVSRNGKFALGFFQPTAVSTISKSSHNSWYLGIWFNKIPVFTTVWVANREEPIAHPNINSTQLKISSDGNLVIVVKHADVGTESLVWSTRIVNRTQTSTINTTTTSVAILLNTGNLAVKVTDNPSSDLWQSFDYPADVVLPGAKLGWNKVTGLNRHIISKKSLVDMSLGLYSLGLDTTGLAILERRKNPAVVFWHWASSKTLSMSIIPVLKTILDMDPRTRGLINPKYVDNDQEEYYMYTSPDESPSSTFVSLDISGLIKVNVWSQLNQSWQTIYTEPTHPCLPPATCGPFTVCSGNPHPSCDCMQSFSQKSPQDWEFEDRTGGCIRNTPLNCTSGKNIMSSTDLFQPISQVSLPYNPQSIDAATQSQCEEACLKTCSCTAYSYNASRCSVWNGELLSVSVDDGVVYNSKDILYLRLAAKDFLPSLRKTKRKPNARIVTAASIFGFGLLMFMMFLLIWRIKFKSCGFLPIYHGDRDSAGGIIAFRYTDLVRATKNFSEKLGGGGFGSVYKGLLSDSKTTIAVKRLDGAHQGEKQFRAEVSSIGLIQHINLVKLIGFSCEGDHRLLVYEHMSNGSLDGHLFKKINDASVVLNWNNRYQIALGVAKGLSYLHQSCHKFIIHCDIKPENILLDASFAPKVADFGLAAFVGRDFSRVLTTIRGTVGYLAPEWLSGVAITPKIDVYSFGMVLLEIISGKRNSSLETSYYTSSSNSYHNVKYFPLQAISKLHSGDVKSLMDPQLHGHFNLEEAERVCKVACWCIQDNEFDRPTMGEVVRVLEGLQKIDMPPMLRLLAALTEH
>HvleckRLK5
MATIGPATPALHAVMAAPPRRHLPLFVFFTMPPLYILLGLLLLHTPAWCSSAAATEDTLTVGQSLGVGDKLVSRNGKFALGFFHPAASSISKSSRNATSPTFSWYLGIWFNKIPVFTTVWVANREEPITHHNLNLTQLKISSDGNLVIVNHVAKTQSIVWSTHIVKRNSSSINTTTSITVVLLNSGNLALLANSPDMLWQSFDYPTDVALPGAKLGRNKVPGFIRQYISKKSLIDQGLGSYSIELNSAGIVLKHRNPSVVYWLWTSSRTSSLNLVQLIKTTLDLDPGTRGLINPTYVDNDQEEYYMYTSPDESSSSVFVSMDISGQIKVNVWSQSSQSWQSIYSEPADPCTPPATCGPFTVCNGIARPSCDCMESFFQKSPKDWEFEDRTGGCIRNTPLHCNTSDNNKNLTSSTDIFHPIAQVALPYNLQIIDVATTQSKCEEACLGSCSCTAYSYSNNRCSFWHGELFSVNLNDGIDNNSEDVLYLRLAAKDLPRGSRKNKRKLKVRVVTIVSIIVVGLIMVVLLLLIWRNKFKRYGFSIYHNPGSAGGIVAFRYTDLVRATKSFSEKLGGGGFGSVYKGMLSDSATTIAVKRLDGARQGEKQFRAEVSSIGLIQHINLVKLIGFCCEGDHRLLVYEHMLSGSLNGHLFKKSNTNVVVLNWNIRYQISIGVARGLSYLHQGCRECIIHCDIKPENILLDALFVPKVADFGLAAFVGRDFSRILTSFRGTAGYLAPEWLTGVAITPKVDVYSFGMVLLEIISGRRNSSSETSYNTSSSNSNQDIEYFPVEAISKLHGGDLKSLVDPQLHGDFNLEEIERVCKVACWCIQDNELDRPTMGEVVRVLEGQQDIVVPPMPRLLAAITEQSGAATSVEL
>HvleckRLK6
QPRNLYTSKHYDELLRKFKLPRSFQLWVAGYSSKFPSMAPLVFLLLFGQFLLCTAVDTITSTTPLSGSQQILSQGSKFALGFYSPPRGNTTTSSYYIAIWYSTIPLTTVWTATTDMLVSEPAFVSLEIARDGNLVLRDKYTNQQLWSTNVSIASNSTMAIIRDSGSLELTDASNSSMVYWQSIDHPTNTFLPGSKLGLNKATGLSQKLVPWKNSADPSPGLFSLELDPNGSTQYFIRWNESINYWTSGPWDGNRFSLMPEMTAGYIYDFQFVNNAKESYSYYSVKNDSILSRFIIDVTGEIKQLIWLDYSREWVLFWSQPRTHCEVYALCGAYSSCNGTVLPHCNCIKGFSQKVQSDWDLQDYSGGCKRNTPLQCQTNLTSAHAPSDKFHVMEDVRLPDNSQGAVATSSQECQVVCLNSCSCTAYAYNYTGCFVWHGDLINLQEQYRGIGGGTLLLRLAASELPDQQRKKTMVIVSTVGGVAAVLMILAIVLFFLSRMCRRDRTFRISKTAGAALTDFRYSDLLDDTQSIDSLLLNLSTLRVATNDFGEGNMLGKGGFGMVYKGVLPDGKQIAAKRLSQSSRQGIGELKSELVLVAKLRHRNLVSLVGVCLEEQEKILVYEFMPNRSLDTILFDSEKRKDLDWGRRFKIISGVARGLQYLHEDSQLKIIHRDLKASNVLLDFDYNPKISYFGLAKIFGGDQSEDVTRRIAGTYGYMSPEYAMHGQYSAKSDAFSFGVLVLEIVTGRRNNGSCNSEKYVYLVNLVWEHWTRGNVIELVDPYLSGHPSHVDQVLKCIQIGLLCVQNRPEDRPTMSLVNAMLTSQSVRLPSVSMPAFCDRLSGCSGNSESASSNGMTITKLEPR
>HvleckRLK7
MASHQLRLLELLLMLLLSSASHARDIISPGQPLRGNDTLVSSGAGSFVLGFFTPPGSNNTYVGVWYAKVSVRTVVWVANRADPVPGPVERNARATLSVSADGTLSVAGPNSTVVWSVPPAPGAGAGRCTARLLDSGNLVVSDASGAVAWQGFDHPTDTLLPGMRVGMDFGTGANMTLTAWTSPSDPSPGPLVAVMDTSGDPEVFIWNGAEKVWRSGPWDGLQFTGVPDTATYMGFNFSFVNTPKEVTYSFQVANSSIVSRLTLNSTGAAGGLLQRWTWVWSAGAWNMYWYAPKDQCDAVNQCGPNGVCDPNSLPVCECLRGFAPRSPEAWALRDNRAGCARATPLDCGNGTDGFALMAHAKVPDTTAAVVDFRAGLAECARLCQRNCSCTAYANANLSGAPGRRGCVMWTGALEDLRVFPNYGQDLYVRLAAADLDAISKSDKKAHVIIAVVVSICALVAILALVGFFLWRRKRTKARQSVGSQSKWSGVLHSRTLQSEGTSHGVDLDLPIYDLETIAEATQGFSTDNKLGEGGYGPVYKGKLEDGQEIAVKTLSQASTQGPDEFKNEVMLIAKLQHRNLVRLIGCCICGQEKILIYEYMENKSLDFFLFDKSRSMLLDWQTRYRIIEGIARGLLYLHQDSRYRIVHRDLKTSNILLDKDMTPKISDFGMARIFGGDDSEINTLRVVGTYGYMAPEYAMDGVFSVKSDVFSFGVIVLEIITGIRNRGVYSYSNHLNLLAHAWSLLSEGKSLELVDETLKGTFDSEEVVKCLKVGLLCVQENPDDRPLMSQALMMLAAADAASLAAPKQPGFAARRAAATATVTVTEDTSSSRADRSFVDSMTITMIEGREKKSMDG
>HvleckRLK8
MSAFDTLLVLLLLSSLHAPPCSSTTSHDTLTAGQTLAVGDKLVSSNGKFALGFFRPAARTTTSKSDTTTSPNWYLGIWFNKIPVFTTVWVGNRDKPISDSELHLTQLKISTDGNLAIVNHAGTESLLWSTHIINTTQTNINITSTAVLFNNGNLVLTQGPSSGLPLWQSFDYPTDVLLPGAKGGRNKLTGLSRLGISKKSLIDPGLGSYTLELATSGIIMKRRNPSVVYWNWEYGTSQMSKLLPVIMMVLNADSRTKGLINVTYVDNNEEEYYMYTSPDESSSTLSLDISGQIKLNIWSEAEQSWQTVQSKPIDPCTPTATCGPFTVCNGTARGTARPFCDCMESFSQKSPADWYLDDRTGGCIRNTPLHCPTKKNNTSSTDMFHPIAHVTLPYNPKSIQNITTQRKCEEACRGSCSCTAYSYNNNMCSVWHGELLSVNLNDGIEIFSEDVLYLRLAANDFPSLSKNKRKLNIGVVIAASIISFALIMLVMLLVIRRTKLKWCCSPLYDNQGCGGIIAFRYTDLVHATKNFSEKLGGGGFGSVYKGVLSGSTPIAVKRLDGARQGEKQFRAEVSSLGLIQHINLVKLIGFCCEGNNRLLVYEHMLHGSLDGHLFKSNCVVLSWSTRYQIALGVARGLFYLHQSCHKCIIHCDIKPENILLDASFAPKVADFGLAAFLGRNFSRILTTFRGTVGYLAPEWLSGVAVTPKIDVYSFGMVLLEIISGRRNSGEECTSNSYHVEYFPVQVVNKLHEGDVGSLVDPQLHGDFNTVQAERVCKVACWCIQDNEFDRPAMDEVVRVLEGLQEIDMPPMPRLLAAIAEQSDATSM
>HvleckRLK9
HRRLFVAFLSVLLLTAAAVAADSTLTQRSAIGGDQLRLVSPGDIFQLGLFSVANNTKWYLGIWFTVSPSAVVWVANRDRPLNASSSGILALSGRGDLVLLDAARNNETVWSSNSSAAAAVAQLRDNGNLVLADAAGAVVWQSFEHPTNTFVAEMRSGKDLKTGTLWALSSWRGADDPSPGDFRYVMDTSSGSPELHVWSKGRKAYRTGPWNGVRFSGIPEMTAFEDMFEFRFTNTPDEVSYVYRDRAGTPASRVVLNETGVMQRMVWNQAAGTWSVFWSGPRDQCDRYGACGAFGVCNVVDAVVCGCVPGFRPSSPPEWRMRNASGGCARSTALQCEGGGEDGFYALRGVKLPETHGSSVDAGVSLDECRRRCLSNCSCTAYAASDIRGGGGGSGCIQWFGELMDTRFVDGGQDLFVRLALSDLETTKNKKFLTVIAAVIAGFALLLLSLSFLIWRKVQRRRMEVAMFDDITRGECPTYHLETIRAATDGFRPENEIGRGGFGIVYKGQMLDGQEVAVKRLSAENRVQGLKEFKNEVDLIAKLQHRNLVRLLGCCIHCSDRILVYEYMSNKSLDTFIFGTYLVQ
>HvleckRLK10
REMMSQSLHRLFLAILSVLLLTVTAASAAADSTLTRRSAIGGDQLRLVSPGDIFQLGLFSVANHTKWFLGIWFTVSPEAVIWVANRDRPLNASSSGILALSGRGDLVLLDAASNNETVWSSNSSAAASNNETVWSSNSSAAAVAQLGDNGNLMLADAAGAVLWQSFDHPTNTYVSEMRIGKDVETGAEWSLSSWRHDHDPSAGDFRYVMDTRGSPELHIWRKERKSKTYRTGPWNGVRFSGIPEMATYKGMFEFQFTDTADEVSYMYHASVGSPPSRVVLHESGVIQRMVWNSAALGWSIFWSGPRDECDKYGVCGAFGVCNEVDAVVCGCVRGFRPRSPAEWRMRNASGGCVRSTPLQCGGGFYGLRGVKLPETHGSSVDAGASLEECRRRCLANCSCTAYAASDIRGGDGGSGCIQWCGELVDTRFIDGGQDIFVRLAMSDLATMFDGIIRGKCPMYDFETIRAATGGFHPENEIGRGGFGIVYKGQMQDGQKIAVKKLSTNNRVQGMKEFKNDVDLIARLQHRNLVRLLGCCIHYSDRILVYEYMSNKSLDNFIFDLRRRATLSWKTRMDIILGVARGLLYLHQDSRHTMIHRDLKAANVLLNGEMVAKISDFGIAKLFSNIDDNQDSTVTERIVGTFGYMAPEYAMDGMVSFMQDVYSFGVLLLEIVSGRRNQRNFNLIAHAWKLFEENKSLKLLDPTVRDDCSHEELEQAATCIQVGLLCVQESPSQRPQMAVVIPMLSQQQVPRRPLRPVVCMPVSTRDDHLNRQEDTSSNFQMIITDLEGR
>HvleckRLK11
MDPFFLLLFVQILLCKAGDTINSITPLSGSQMIVSQGNKFTVGFHSPSQSNTTSSTSSSYYIAIWYSNIPQVTTVWNTDEPVSNPATASLEIARDGNLVLLDQAKNQLLWSTNVSIVSNSTMATIRDSGSLELIDASDSSIVYWRSIDHPTNTWLPGGKLGLNKTTGLSQRLLPWTNKANPSPGLFSLELDPNGTKQYFVQWNESINYWTSGPWNGKIFSLVPEMTAGYYYNFQFVDNATESYFYYSMKDNTVISRFIMDVTGQIKQLTWLDNSQQWILFWSPPQRQCEVYALCGAFGSCSEAALPYCNCIKGFSQNVQSDWDLEDYRGGCKRNIPLQCQTNSSSGQTKPDKFYPMASVRLPDNAQRAEGASSKECEQACLKSCSCDAYTYNTSGCFIWSGDLVNLQEQYSGNGVGKLFLRLAASELQDPKTKKVAIVGAVVGGVAAILIILAIVFFFLYQKFRRERTLRISKTAGGTLIAFRYSDLQHVTKNFSEKLGGGAFGSVFKGKLPDSTAIAVKRLDGFHQGEKQFRAEVSTIGTTQHVNLVRLLGFCSEGSRRLLVYEYMQKGSLEVQLFPGETTALSWAVRYQIALGTARGLNYLHEKCRHCIIHCDVKPDNILLDDSFVPKVSDFGLAKLLGRDFSRVLTTMRGTRGYLAPEWISGVPITAKADVFSYGMMLLEIISGRRNADHGEEGRSTFFPTLAASKLHEGDVQTLLDPRLKGDANSEELTRACKVACWCIQDDESTRPTTGQIVQILEGFLDVNMPPIPRSLRALGESPDVINFFSDLSSSQTSQTQNSTTTSQTHSATSGSSHFHSS
>HvleckRLK12
DTINSTTPLSGSQKILSQGNKFTVGFHSPSQSNTASSTSSSYYIAIWYSNIPQVTTVWNTDKPVSDPATASLEIARDGNLVLLDQAKNQLLWSTNVSIASNSTMATIRDSGSLELTDASNSSIVYWRSIDHPTNTWLPGGKLGLNKTTGLSQRLLPWKNKENPSPGLFSLELDPNGTKQYFIQWNESINYWTSGPWNGNIFSLVPEMTANFRYDFQFVDNATESYFYYSMKDDTVISRFIMDVTGQIKQLTWVEYSQQWILFWSQPRTQCEVYALCGAYGSCSEAALPYCNCIKGFSQKVQSDWDLEDYRGGCKRNVPLQCQTNSTSGQTKPDKFYTMAGVRLPDNAQRAVGASSKECEQACLKSCSCDAYTYNTSGCFIWSGDLVNLQEQYSGNGVGKLFLRLAASELQDPKRKKATIVGGVVGGVAAILIILAIVFFFVYQKFRRERTLRISKTAGGTLIAFRYSDLQHVTKNFSEKLGGGAFGSVFKGKLPDSTAIAVKRLDGFHQGEKQFRAEVSTIGTTQHVNLVRLLGFCSEGSRRLLVYEYMQKGSLEVQLFPGETTALSWAVRYQIALGTARGLNYLHEKCRDCIIHCDVKPDNILLDDSFVPKVSDFGLAKLLGRDFSRVLTTMRGTRGYLAPEWISGVPITAKADVFSYGMMLLEIISGRRNADHGEEGRSTFFPTLAASKLHEGDVQTLLDPRLKGDANPEELTRACKVACWCIQDDESTRPTTGQIIQILEGFLDVNMPPIPRSLRALGESPDVINFFSDLSSSQTSQTQNSTTTSQTHSATSGSSHFHSS
>HvleckRLK13
MAHATSAALALLIFLLCRHVHVDAATTLLQGQSLAGDDKLLSANGAFSLSFFSPSGGDGTRLYLGVMYAKAAEPTVPWVANREAPVSAAASSYAATVTDSGDLRVLEGERIVWQTNTTSSVGNFTLTIQDTGNLVLAGGSGAQAVQLWQSFDYPADTFLPGMKITLARRDGAVVSQTLFRSWRSPDDPAPGNFTLGQDPLGSAQLYIWRRSEDGKNVTHWRSGQWAKTSFVGIPWRPLNLYGFQLSGDLSQSNGQYYTFHIFNSSQYRFMLQPNGTETCYQLVDATGAWEVVWSQPTVPCQAYNTCGPNAECSADDHCSCLKGFEPKSEAEYGDGVWAQGCVRSSQLTCSERNVSMSGGDAFAVLAGVKLPDLAAWESAVSSADACMQWCLANCTCNAYSYSGATGCLTWAQELVDVYHFPDGQFPNGQGYDLHIKVPASVLDSGSKRRTRVIVSVVIVLAVVLAACGFVLWKCRRTIREKLGVGGGKKRTGASLMLRPAAMKAKHDFSGPKQPDQDEAENGDGCELPLFTLETLAAATGGFSEANKLGEGGFGHVYKGSLPGGDEVAVKRLSRSSGQGCEEFKNEVILISKLQHRNLVRILGCCIHGHEKMLVYEYMPNKSLDAFLFDPARRGLLDWKTRLHIIEGIARGLLYLHRDSRLRVVHRDLKASNILLDNDMNPKISDFGMARIFGGDKNQENTNRVVGTLGYMSPEYAMEGLFSVRSDVYSFGILILEIITGQKNSSFHHMEGSLNIVGYAWQMWNSDKGEQLIDPSIRASSSASASREALRCVHMALLCVQDHAGDRPDIPYVVLALGSDSSVLPMPRPPTFTLQCTSSDRDGFRGKADESYSTSDLTVTMLQGR
>HvleckRLK14
RANPAPTLLHSSCGLCNCKLPLSLGWFTMPLLLFVFTALFALHAVPANSATTDAISAAQPLVGGDKIVSRNGRYALGFFETGGDSNWYMGIWFNTVPKLTPVWVANRDDPIKNITSLELTISGDGNLVILNRSSSSIIWSSQARVTTTDTIAVLLNTGNLVLQESSPSSSDVFWQSFDYPTDTFLPGAKLGYDKVTGLNRRLVSWKNLINPATGAYHEELDPSGLDQFLLAPLNSSIPYWYSGAWNGQYFALMPEMSNGYFINFTFVDNDQEKYFMYTLHDETTVIRNYLDPLGQAKTNLWLESSQNWMVMFAQPKAQCDVYAVCGPSTICDDNALPSCNCMKGFAVRSPEDWGPGDRTSGCLRNTPLDCSNRSTSSTDRFYPMPCVRLPQNDPSKRATAGSDECAQICLGNCSCTAYSFVKGECSVWHGELLDLRQHQCSGTSSTNGETLYLRLAAKEFPSQQASRRGKPNVILIICATVASLGLLAALVLLIMIWRNRTKLSDGTLKNAQGVNGITAFRYADLQRATKSFSEKLGGGSFGSVFKGSLGDSTTIAVKRLDHANQGEKQFRAEVSSIGIIHHINLVRLIGFCCEGSRRLLVYEHMPNRSLDLHLFQSNATMPWHARYQIALGIARGLAYLHDSCQDCIIHCDIKPENILLDASFAPRIADFGMAKLMGRDFSRVLTTVRGTAGYLAPEWISGVAVTTKIDVYSYGMVLLEIISGRRNSWAPCSCGGEHGVYFPVKVAQKLLEGSDVGSLVDHMLHGDVNLDEAGTACKVACWCIQDDEFDRPTMGEVVQILEGLAEISVPPMPRLLQAMSGRGSSHSICS
>HvleckRLK15
LPVLLALLCALHAPVSSASTVTYSLSPGQSIAGDDKLVSSGGKFALGFIQIPGIDSNPSGSGGNNNTQLGIWFNLVPKLTPVWVANSGGSPVAGARSPELTISGDGNLVIVDRGNVAWSTRADVTASNNRTVFLLLDTGNLVLRSASNASDVLWQSFDHPTDILLPGATIGLDKVTGRSRRLVSRKNRIDQAPGLYSMELGRSGVVRMLWDSSVPYWSSGEWNGEYFSSVPGMTARHLFGFTFVNDDREVSFAYHLLDETITMYSFLDVSGQRKVLAWHQATQNWATVYTHPTAQCEVHAACGPFTVCGDYAPPPCSCMKGFSVDSPDDWDLDDRSTSGCRRNTPLNCASISNSTMVGLADIFYAMPAVRLPYNPHSAVGRVTSAGECEQLCLSNCSCTAYSFGTGGCSMWHGGLLNVEQHQIDDASSGDGEILYVRLAAKEFGTRKNNTVVIILGAIAASLTALGILVLTVVLRRTRRNKWYSRTLDNIHGGSGLVSFRYSDLRRATRNFSEKIGAGGFGSVFKGSLNDSTTIAVKRLYGCYQQEKQFRAEVSSIGILHHTNLVKMVGFCCEGDKKLLVYEHMPNSSLDAHLFRSSAETLNWRTRYQIALGVARGLAYLHESCLDYIIHCDIKPQNILLDALFVPKIADFGMAKLLTRDFSRVVTTTRGTFGYLAPEWISGVAITPKVDVYGYGMVLLEIISGRMNANGECGSSGDDIVYFPIQVARKLLEGNVMSFVDDRLNGDVIVDEVERACKVACWCIQDREFERPTMGKVVQILEGLVQVDTPPMPKLLEVIAGRSNSACT
>HvleckRLK16
MAFTFFSMPPLCILLLGLLLLHTTPWCSSSAAATNDTLMAGQELAFGDKLVSRNGKFALGFFQFHPASTISKSSHNTTSPSPSPWYLGIWFNKIPVFTTVWIANRDQPITNPHVTIAQLKISRDGNLVIVNHAANNESIVWSTHIVNNRTHSSINAPSSAVLLKSGNLVLKESRSSDLLAWQSFDYPTDVVLAGAKLGRNKVTGFTRQPISKKSLIDPGLGSYSIDLEDTRGLVLSRRHNPSVVYWQYASSTTSSFNLVRVLNSLLDSNSLTKGLYNLVYVDNEQEEYYMYTSHGESSPSVFVSLDMSGQIKLNHWSQATRSWQIIYAQPDDPCNPPAACGPFTVCRGNPNPSCDCMESFSQNSPQDWKFQDRTGGCIRNTPLHCTSDKNITSSTDMFQPIAQVTLPYNPQIIAVASTQSECEETCLGSCSCTAYSYKDSKCSVWNGELLSVTRNDGIEYISKDVIYLRLAAKDFIPGLRKNKRKPNVGVVTSASIIGFGLLMLMFLLLIWRNKFKWWWCCFLPLYYDNQGSVGGIVAFRYTDLVRATKNFSEKLGGGGFGSVYKGVLSDSKTTVAVKRLDGASQGEKQFRAEVSSIGLIQHINLVKLVGFCCEGDHRLLVYEHMLNGSLDRHLFKKSNNVDVVVLNWNTRYQISLGIARGLSYLHQSCRECIIHCDIKPENILVDTSFVPKVADFGLAAFVGRDFSRILTSFRGTIGYLAPEWLSGVAITPKVDVYGFGMVLLEIISGRRNSSPEISHNTKSCSNSYQHHEYFPVQAIRKLHGGDVKSLVDTQLHGDFNLEEVERVCKVASWCIQDNEFDRPTMSEVVHVLEGLQEIDMPLMPRLLAAIVEQSHAATSM
>HvleckRLK17
MRWPSNFSFTFYICSRMVLRRRPHAPQLVPCCRELKKMGFRGKSCIPLLTLLLLSSLCKSDDQLTHAKPLSAGDTIVSKGGHFALGFFPSNSPNTSLYLGIWYHSIPGRTIVWTANRDNPIAATSSPTLAITNSSGLVLSDSQGRTPWAVKNDITGTGVAAVLLDTGNFVLLSPNGTRIWQSFDHPTDTILPGTRIYLREKKDKGLVARRLIAWKGPIDPSTGDFSLGLDPNNYIQLVIWHGTMPYFRLNVLDYASVAGAVYQNTVFYEAFGGTSTDGFYYEFSVSGGSPYARLMLDYMGVMRTLSWNNHSSWTTVNAYPSSSCELYASCGPFGYCDNTGAAATCRCLDGFEPAGLNFSSGCTRTKELECGKQSHFVTLPKMKLPDKFLHVLNTSFDECTAECNNNCSCKAYAYTNLSNNSAMAQQSKCLLWTGDQLVDTGKYSNIDEILYLRLANSPVQNGKLVKIILPTMACVFILACIALGIYKCKGKIKKGLYCQDCTSFL
>HvleckRLK18
MGGSILHAAAWWKLPPWCAILPYIMEYSSVEAHKRCWLAHGFMAILPCIMPRDASNERSIIQSKWQPKWMRSTAVLVTNLDCPAASDTLTSGQSLAVGGSKLVSRNGKFALGFFQPAAGTISKSQNTSGSSWYLGIWFNKIPVFTVVWVANRDQPITGPSLSRTKLQISNDGNLVIVHNDSVLWSTHIVNNRTQARGINTTASAAVLLNSGNLALTVTESPSSSDLLLWQSFDHPIDIVLPGAKFGRNKITGLNRKGVSKKSLIDQGLGSYSVELDTSGQVVLKRINPSVVYWHWASSKTSSLKLIPILKSILDIDPRTKGLINPAYVDNDQEEYYMYTSPDESSSTFVSLDISGQINLNVWSQASQSWQTIYSQPVDPCTPAATCGPFTVCNGTAQPFCDCMGSFSQKSPQDWVFNDRTGGCIRNTPLQCNTSSNNKNMTSSTDIFNPITQVTLPYNPHSIDVATTQSKCEEACLSSCSCTAYSYNNSRCSVWHGELLSVNRNDGIDNVSEDVLYLRLAAKDLLPNLMKNKRKPNVGAVTAASIIGFGLLMLMVLLLIWRKRVWWCGLPLYSNEGSSAGIIAFRYTDLVRATKNFSEKLGGGGFGSVYKGVLSDSKTTVAVKKLDGVSQGEKQFRAEVSSIGLIQHINLVKLIGFCCEGHHRLLVYEHLFNGSLDSHLFKKSNNADVAVLNWNTRYQITLGVARGLSYLHQSCRECIIHCDVKPENILVDATFAPKVADFGLAAFVGRDFSRILTTFRGTAGYLAPEWLTGVAITPKIDVYGFGMVLMEIISGSRNSPETHNTSSSTSYHAEFFPVQAINKLHGGDVNSLVDPRLHGDFNLEEAERVCKVACWCIQDNEFDRPTMGEVVRVLEGLQEIDVPPMPRLLAAITVQPGAAYSVQL
>HvleckRLK19
SLMDMHYILIFFLIFLSSFCKPNDQLTHTNLLTHGDMLVSKSGDFALGLFSPTSSNKSFYLGIWYHGLPGPRTVVWVANRDNPIINPSSAMLTINNNSCMVLSDSEGRNIWMTSNNITVGAYAILLNSGNFVLRSLDDKDIWQSFDHPTDTILPSMKVLVSYKGHAVGRLVAWKGPDDPSSGDFSCSGDPSSPDTQLVTWNKTKPYCRIKVWNGLSVSGGTYLGNGSSILYQTVVYSGDEFYSVSTVSDNSPFMRITLDYTGKMKSLTWDNHSSSWALMDERPAAACDLYASCGPFSYCDSTQIISACQCLEGFEPVDSIDLSKGCRRKQELKCGKQSRFVPLPGMMVPDKFLRIHNRSFDECAAECDRNCSCMAYAYANLSRAGVMADPSRCLVWSGELTDIGKTTTGEDLYIRLVGSSVDRKISLIKIGLPIMACMLLVTCPTLVWMYKYRGKWQKMVKQKKLMRGYFSTSNRLEGENIEFPFVSYEEILSATNCFADSNLLGRGGFGKVYKVTKSSTYNTM
>HvleckRLK20
AASCKDMMFLNFRVMLISVLFVSLGTTSLAGVSSPPDKLNDGRRNITDGEMLVSAGGSFTLGFFSPGAPSRRYVGIWFSASTDAVVWVANRDSPLNDTAGVLAIDGAGRLILLDGSGRTAWSSSNTTNRGSTSSLSAEARLLESGNLVVVRDESSGAVLWQSFDHPSNTLIAGMRLGRNPQTGAEWSLRSWRSPDDPATGDCRRAMDTRGLPDCVSWRGDAKKYRTGPWNGLWFSGVPEMASYSDMFTNQVVVRADEVAYVFNATAAAPFSRLVLSEDGVIQRLAWDGGSRVWNVFAQAPRDVCDDYAKCGAFGLCNVNTASTLFCGCVQGYVPVSPAHWSMREAAAGCRRNAPLDCRDGGAATTDGFVVVPGVKLPDTDNATVDVGATLEGCRARCLANCSCVAYAAADIRGGGGGSGCVIWVGHIVDVRYVDKGQDLYVRLAKSELAVNKKRGSMLKILLPVTACLLVLMCIFLVWICKFRGNRRNKDVQAKSILGVSSNQLIGDENIELPLVSFRDIVTATNDFSNENMLGQGGFGKVYKGMLDDDKEVAIKRLSKSSGQGAEEFRNEVVLIAKLQHRNLVRLLGYCVHEDERLLIYEYLPNKSLDVFIFDTESKYVLDWPTRSQIIKGVARGLLYLHQDSRLTIIHRDLKSSNILLDVDMSPKISDFGMARIFGRDQQEANTNRVVGTYGYMSPEYAMDGAFSVKSDTYSFGVLLLEIISGLKISLPQLSDFPNLLAYAWNLWNDGKPMDMVDSSIIDNCSPTEVLRCIHIGLLCVQDNPYNRPLMSSVVFMLENETTSLSTPQRPVYFAYRNSEAKETGENTSSSMNNMSVTMLEGR
>HvleckRLK21
MGKTLPVIFTLLLLICLCKSDDRLTPAKPLLPGDKLVSNNGIFALGFFSSDPENSRAANSYLGIWYHDIPERTYVWVANRDNPIGSGLSGKLVLTNTSDLVLSDSKGRVLWRTTNNITTGGDGAVALLLEAGNFVLQLRNFTQIWQSYDHPTDTILPSFKLWANYKVHTAVRLVAWKGPQDPSTGMFFLSRDPGTGLQVLTLRGRSKYWRSGLWNGAEASDKNGFMWSQIVDDGETIYSTYNTGNSSARRSHWKLDYNGDLMLRIWSGQSWMPLFKRPDSGCRRYGSCGPFGYCDMFDKICRCLDGFQPADGFGAIPSRGCVRKENLTCRGDHFLTLPEMKVPDKFVYVRNRSFEECTADCERDCSCTAYAYTNLSSIVATGGPSRCLIWTGELVDSEKAGMLGGNLYLRLAGSQERSPAVNNTKSGVGVVFKIALPVIFVLLTLICIYLVCIWKPKGIQVKNETLKRPALEHLDQNLEFRSIRFQDIATATNSFHDTNVLGKGGFGKVYKGTLEDGKEVAVKRLSKGSDQGIEHFRNEVVLIAKLQHKNLVRLLGCCIHEDEKLLIYEYLPNKSLDQFLFDIARKSMLDWPKRFNIIKGVARGLMYLHQDSRTTIIHRDLKPSNILLDVQMNPKISDFGMARIFGGNEQQESTRRVVGTYGYMSPEYAMEGIFSVKSDTYSFGILLLEIVSGLKISSPHHLVMDFSNLISCAWNLWADGKVKDFVDAAVMESYSLDEVSKCIHVGLLCVQDSSSARPHMSSVVSMLDSEATPRAAPKQPTYFAQINYETSDATEDLENSANGVSLTALEGR
>HvleckRLK22
MVASRPRLLGVFDEVNTSKSLKWSISWSFNSPHRPAGGSSFISASKQANTDHFTHTISLPCSSQAYVKKGLMGITPLPLFILLLLICFCKSDDRLTPTKPLLPGDKLVSNNGIFALGFFSPENSANSYVGIWYHGIPERAYVWVANRDNPIGSGLSGNLVLTNSSDLVLSDSKGSILWRTTINVTAGGDGAVALLLEAGNFVVQLQNFTQIWQSYDHPTDTILPGFKLWANYKTHTAVRIIAWNGSQDPSTGKFVLSRDPSTGLQILTWRGTRKYWRSGMWNGAEASDENGYMLSENVDDGKMIYSTFNTGNSSSRRTHWKLDYTGDLLLRTWSGQSWVVLFKRPDDGCRHYGSCGPFGYCDMPTGECRCLDGFEPADSFSANFSRGCVRKEALTCRDYHFLALPGMKVPDEFVYVRSRSFEECTAECERNCSCTAYAYANLSSIVATGGPSRCLVWTGELVDLEKTGELGGNLYLRLAGSPGHNGKGDVGVVLKIVLPVISFLLILSCIYLVCICKRRGKQVNKENLKRPTLEHLSTSQEVWDQNLELRSISFEEIASATNSFHDMNVLGKGGFGKVYKGTLEDGKEVAVKRLSKGSEQGIEHFINEVVLIAKLQHKNLVRLLGCCIHEDEKLLIYEYLPNKSLDNFLFDNERKSMLDWPRRFNIIKGVARGLLYLHQDSRTTIIHRDLKPSNILLDMEMNPKISDFGMARIFGGNEQQESTRRVVGTYGYMSPEYAMEGIFSVKSDTYSFGILLLEIVSGLKISSPHDLVMDFSNLISCAWNLWADGRVRDFVDAAVTESYSLDEVSKCIHVGLLCVQDSSSARPHMSSVVSMLDSEAMPRTAPEQPVYFARINYETSEAMEDTENSANGMSITAVEGR
>HvleckRLK23
KPLSPGDMLVSKDGIFALGFFSPANSNRSLYVGIWFYNIPESSHAIVWVANRDNPATTTSPATLAISVKSDLVLSDSEGHTLWMTKNNVTADEDARAFAVLLDTGNLVLRSPNGTVMWQSFDHPTDTILPGMRFLLSYKGHVVGRLVAWKGPDDPSLGDFSFGLDPDLDIQMVTWHGAKLYCRISVWNGASVSGGTYPGSNSSVVYQTIVNSGERFYLMYSVSDDSPYARIMLDYTGTMRLLTWNSYSSSWIATSERPSGSYGVYDSCGPFGYSDFTGAVPTCQCLDGFEPDPVNSSRGCRRVEALKCGSKNHFLALSGMKVPDRFRHIRNRSFDQCAAECSRNCSCTAYAYANLRSAGALGDQTRCLVWTGELVDTWKTSNYGENLYIRLGDDSPAAVHKNSHLVKIVPPVVACLLLLTCIAIVWKCEYKMVQRKKEIKKKLMLRYLSASSELGGKTLDFPFVSFKDIVDATDNFSDSNMLGMGGFGKVYKGILEGDKQVAIKRLGSGSGQGIEEFRNEATLIAKLQHRNLVRLLSCCIHDDEKLLIYEYMPNKSLDSFLFDNTRKDVLDWLTRFKIIKGVARGLLYLHQDSRLTVIHRDLKASNILLDKEMTPKISDFGMAKIFGGNQQQGNTIRVVGTYGYMSPEYVMGGAFSVKSDIYSFGVLLLEIVSGLKISSPQLIMNFPNLTTYAWRLWEDGNAMELVDSTIAGSCPIHDVVRCIHVGLLCVQHHSNARPIMSSVVFMLENETALLPEPEQPAYFATRNQENGHTGENMDNSPNTMSITTLIGR
>HvleckRLK24
MSMTSLPVFLLPIFVLLSLICLCKSDDRLSPAKPLSAGDKLVSSNGVFALGFFSPTNSTADSYIGIWYNNVTKRTYVWVANRDSPITSGSPGKLVVTNNSNLVVSDSQGRTRWTTMNNFTSGTTGTSAILLNSGNFVIRLPNGTDIWQSFHHPTDTILPGMPLPLSTNDDLYTRLVAWRGPDDPATSNYSMGGDSSSDLQVVIWNGTRPYWRRSPWNGELVTASYQSSTGFIMTLRIVYRGDDLYMTFTVSDDSPSMRMTLQYTGMFQFLVWNRESSSWDVFTEQPSPSCDQYAYCGPFGYCDATEAVPKCSCLSGFEPDGVNFSRGCRRKEDLRCGGGDNFLTLRGMKIPDKFVYVRNRSFDQCRAECSRSCVCTAYAYANLQNGSTSDDLSRCLIWLGELVDAGKFRDGENLYLRLASSTVAKESNVLKIVLPIIAGILILTCVSLVWICKSRGKRRIKETKDTYTRQPSKNPKSNELENETIELPYICFEDVVTATGNFSDHNMLGKGGFGKVYKGWLEGGNEVAVKRLSKNSGQGAGEFRNEVVLIAKLQHRNLVRLLGYCTHEDEKLLIYEYLPNKSLDAFLFGMFCSYGQVSQNILRITEFVMVVNALNFALLLQDATRNFVLDWQTRFKVIKGIARGLLYLHQDSRLTIIHRDLKASNVLLDAEMNPKISDFGMARIFGGNEQQANTVRVVGTYGYMSPEYAMEGSFSVKSDTYSFGVLLLEIVSGIKISSSHLIMDFPSLIAYAWSLWKDGNARELVDSSITETCPLHEVLRCIQLGLLCVQDDPSARPLMSSVVFMLENETAPLPTPKEPVYFRQRKYEVEDQRHDYDQEISLNGMTMTMQEGR
>HvleckRLK25
MSPLPVFVLLSLICLCRSDDRLTPAKPLSAGDKLVSSNGVFALGFFSPTNSTAASYVGIWYNNIPKRTYVWIANRNKPITNGSPGKLVVTNNSDLVLSDSQGRALWTTMNNFTTGATGTSAVLLDSGNFVIRLPNSTDIWQSFHYPTDTILPDMQLPLSADDDLYTRLVAWRDPDDPATSDYSMGGDYSSDLQVVIWNGTTPYWRRAAWDGALVTALYQSSTGFIMTQTTVDIGGKFYLTFTVSNGSPITRMILHYTGMFQFLAWNSTSSSWKAFIERPNPICDRYAYCGPFGFCDFTETAPKCNCLSGFEPDGVNFSRGCRRKEELTCGGGDSFSTLSGMKTPDKFVYVRNRSFDQCEAECRNNCSCTAYAFSNVKNGSTSSDQARCLIWLGKPVDTGKFRDGSGENLYLRLASSTVDKESNVLKIVLPVIAGILILTCISLVWICKSRGKRRIKENKNKYTGQLSKYSKSDELENESIELPYICFEDVVTATDNFSDCNLLGKGGFGKVYKGRLEGGNEVAVKRLSKSSGQGADEFRNEVVLIAKLQHRNLVRLLGYCTHEDEKLLLYEYLPNKSLDAFLFDTTRNFVLDWPTRFKVIKGIARGLLYLHQDSRLKIIHRDLKASNVLLDAEMNPKISDFGMARIFGGNEQQANTIRVVGTYGYMSPEYAMEGSFSVKSDTYSFGVLMLEIVSGLKISSTQLIMDFPSLIAYAWSLWKDGNARELVDSSIVENCPLHGVLRCVQLGLLCVQDDPNARPLMSSTVFMLENETAPLPTPEEPVYFRKRKYVIQDQRDNLEISLNGMTMTMQEGR
>HvleckRLK26
MSMTSLPVFLLPIFVLLSLICLCKSDDRLSPAKPLSAGDKLVSSNGVFALGFFSPTNSTADSYIGIWYNNVTKRTYVWVANRDSPITSGSPGKLVVTNNSNLVVSDSQGRTRWTTMNNFTSGTTGTSAILLNSGNFVIRLPNGTDIWQSFHHPTDTILPGMPLPLSTNDDLYTRLVAWRGPDDPATSNYSMGGDSSSDLQVVIWNGTRPYWRRSPWNGELVTASYQSSTGFIMTLRIVYRGDDLYMTFTVSDDSPSMRMTLQYTGMFQFLVWNRESSSWDVFTEQPSPSCDQYAYCGPFGYCDATEAVPKCSCLSGFEPDGVNFSRGCRRKEDLRCGGGDNFLTLRGMKIPDKFVYVRNRSFDQCRAECSRSCVCTAYAYANLQNGSTSDDLSRCLIWLGELVDAGKFRDGENLYLRLASSTVAKESNVLKIVLPIIAGILILTCVSLVWICKSRGKRRIKETKDTYTRQPSKNPKSNELENETIELPYICFEDVVTATGNFSDHNMLGKGGFGKVYKGWLEGGNEVAVKRLSKNSGQGAGEFRNEVVLIAKLQHRNLVRLLGYCTHEDEKLLIYEYLPNKSLDAFLFGMFCSYGQVSQNILRITEFVMVVNALNFALLLQDATRNFVLDWQTRFKVIKGIARGLLYLHQDSRLTIIHRDLKASNVLLDAEMNPKISDFGMARIFGGNEQQANTVRVVGTYGYMSPEYAMEGSFSVKSDTYSFGVLLLEIVSGIKISSSHLIMDFPSLIAYAWSLWKDGNARELVDSSITETCPLHEVLRCIQLGLLCVQDDPSARPLMSSVVFMLENETAPLPTPKEPVYFRQRKYEVEDQRHDYDQEISLNGMTMTMQEGR
>HvleckRLK27
AGGEGMRAPPPSLLPLLVAAAFLSLSIATDKIDQTASIAGNQTLESAGGVFRLGFFVPPGSSDGRAYVGIWYAAIPEQTVVWVANRRNPVVRPPGVLSLSADGRLVILDGRNATVWSSDDAAGSGGVATRATAQLLDNGNLVVSHGGESQSGSTGRTGLAWESFDYPTDTLLPGMKLGVDGRSSISRNITSWRSPADPSPGDYTFKLVSGGLPEFFLFRNLSKTYASGPWNGAALTGVPNLKSRDFIFTVLSNPDETYYTYYVSDPSVLSRFVLNGTTGQVQRFSWHRSGGGGGGWSSFWHFPLDPCDSYARCGAFGYCDVGQSPLCSCLPGFQPRWPQRWSLGDGSGGCVRRTNLSCGAGDGFWTVSRMKLPEATSATVHAGMTLDRCRQLCLGNCSCGAYAAADVSGGINRGCVVWAVDLIDMRQYPEVVQDVYIRLAQSEVDALTAAASSANRRRSHVVLVIAVVASISGVLLLGAFAFCCLCFWRNRAAAETAAAGGARDDDVLRLRAKKHPRDDRRFSDENKMSGEEDDLDLRLFDLAVILAATDNFAADSKIGQGGFGPVYLGRLENGQEVAVKRLSRKSAQGVEEFKNEVKLIAKLQHRNLVRLLGCCTDGDERMLVYEFMHNNSLDTFIFDGEKRKLLRWNTRFEIITGIARGLLYLHEDSRLRIIHRDMKASNVLLDRNMIPKISDFGIARMFGGDQTTAYTLKVIGTYGYMSPEYAMDGVFSMKSDIYSFGVMVLEIVTGKKNRGFYDAELDLNLLGYAWTLWKEGRSTELLDEAMMGSSCDHSQVRRCIQVALLCVDMNPRNRPLMSSIAMMLATENATLPEPNEPGGNIGKSTSDGELSQTQSELTVTVTDTR
>HvleckRLK28
LLMGAHKSACTISSPVQAMVALYILLGLLLSHAPPSSSATDALTAGQVLMVGDKLVSSNGKFAFGFFQFQPAASTIISKSTTPVSNWYLGIWFNKIPVFTTVWVANREDPIPNNPSWLNQTHFQISSDGNLVIIHQAAVIWSTHIVSNNRTQNTTTGVLLENTGNLALTSSSAQVLWQSFDYPTDVLLPTGKVGWNKVTGLNRRGISRKSTVDPGLGSYSIELETNGNGIILKRLQPSVVYRVYEPETSTILKLLPRIKKILQLDPRTQGVVVPDYVNTPQEQYYTYTSPDESSSSFLSLDISGQIKLNIWSRANQSWQTVLADPVDACTPAATCGPFTVCDGTTQAPCVCMKNFTKKSPQHWEFGDRTQGCTRNTPLYCTSDNKTTSSTDMFHPIAHVTLPYHSQSIDLATTHSKCEEACLSSCSCTAYSYDNRNCSVWHGKLLGVSLDDGIEIHSEDILYLRLAAKDLPTLPKDKRKPNVGVITAASISSFGFLMLMMLLAIWRKKLRWSSLSVYDNQGPSGIITFTYTDLARATKNFSEKIGTGGFGSVYKGVLSDSTIIAVKRLDGTRQGEKQFRAEVSTIGLIQHVNLVKLIGFCCQGDNRLLVYEHMLNGSLDSHLFQSDGVVLNWETRYQIVLGMARGLSYLHRSCRECIIHCDIKPENILLDASFFPKIADFGMATFIGRNFSRVLTTFRGTIGYLAPEWLSGIAITPKVDVYSFGMVLFEIISGRRNSAEENSGISDLVEYFPIQVIRKLHGEDMQSLVDPRLEGMFDLEKAERVCKVALWCIQDNESHRPTMSEVVHVLEGLNEIDLLPMPRLLAAITERRNGTETSV
>HvleckRLK29
MDMVPLHILIGLLLLLHATTPCSSASGDTLAAGQVLTVGDKLVSANGRFALGFFQFRPPSNTTLSESIDTTSSNPDWYLGIWFDKIPVFTTVWVANREDPITDPKPSVTQLKISTDGNLVIIHHTVAIWSTRVVNKNRTQTNTINTTTAVLMDSGNLALQSSSGQPLWESFDYPTDVVLPGAKFGWNKVTGLNRRAISRKSILDPGLGSYIVELDTSGKGIVLQRRNPSVVYRVYAPESSEILKLLPRIQKILELDPRTKGLIVPNYTNNEEEEYYIYISPDKSASSFLSLDVSGQIKLNIWSEASKSWQPVFADPVDVCTPPVTCGPFTVCAGNAEPPCDCMENFSKKSPQHWALGDRTQGCIRNTQLYCTNDKNTTSSTDMFHPIARVTLPYNSQSLNLATTRSKCEEACLGSCSCMAYSYSNSNCSVWHGELLAVNLDDGIEISSEDTLYLRLAAKDLPSLPKDKRKPNVGVVTAASIGSFGLLMLILLVIWRKQIGWCGAPLYGNQGPSGIIAFRYTDLAHATKNFSEKLGTGGFGSVYKGALSDSTAIAVKRLDGALQGEKQFRAEVSSIGLIQHVNLVKLIGFCCQGDNRLLVYEHMLNGSLDGHLFKSNAFVLSWDIRYQIVLGIARGLSYMHQSCRECIIHCDIKPENILLDASFFPKIADFGMAAFVGRNFSRVLTTFRGTVGYLAPEWLSGVAITPKVDVYSFGMVLFEIISGRRNLPEACTGSGAGDRVEYFPVQVISKLCGGDMHSLVDPQLHVDFDLKQAERVCKVALWCIQDDESDRPTMGEVVRVLEGLQEIDMFPMPKLLAAITGRPNVTSV
>HvleckRLK30
SAMAAALLLVLVFAALCLCVGGAGSTDTVSAGRPLAGGDARLVSNNRKFALGFFQSQQASEEFGGSKWYLGIWFSAVPDLTTVWVANGANPILDGASPELAISADGDLAVFNRANATITWSTKSANGSGSTANDTSAVLLNSGNLVLLDASNHSGQPRILWQSFDHPTDTLLPSAKLGRDKLTGLNRRLVSNKTPAGPPSPGAYCYEVDSATPQLVLKLCDSSATYWATGSWNGKYFAAIPELSGNVPTFQLAFVDNGREEYLQYNVTDEAVVTRNIIDAAGQNKHQVWLDASRGWLTLYATPKGQCDVYGVCGPNTVCAYSLRPLCSCMKGFSVWSPEDWAQGDRSGGCVRTWQQGESFLEDASGSGDKFFSMTDVSLPDKAQRIQAAESMAECSEACLSNCSCFAYAYAGQGCLVWTDRLLNAKLGQSNGGTTAASDGETLYLRLAASEMTRSARSNRRRRAIIGVAIAAGTAAAAAVLVMVALMMRRSRTNNVVQDGGLVAFRYRDLRSATKNFSEKIGEGGFGSVFKGQLRDTDIAVKRLDGSFQGEKQFRAGVSSIGVVRHVNLVKLIGFCCDGDGRFLVYEHMPNRSLNIHLFGQSDGGGGVFLDWSTRYQIAVGVARGLAYLHEGCRDRIIHCDVKPQNILLDVSLRPKIADFGMAKFVGRDFSRALTTMRGTMGYLEPEWISGTPITPKVDVYSYGMVLLELVSGRRNSSGGSWTWTTHADDDQVVDYFPVRASRKLAAGEVRSLLDESLCGEAELKEVERACKVACWCIQEDEAVRPAMGQVVQILEGVLDREMPPLPRLLEAIFAGRPRSVDTSIF
>HvleckRLK31
LFYSQSRLSKVWPPLIVGQGAALAPLEVMPTHGGGAARSLGPGNSPPIPAALLFLLLHGSLLAASATTDTIRGGKGISGNETLVSKSGGFELGFFPPGPGIHYFLGVRFRNMAGNSPAFWLGDRVVITDLPGASLEIFGDSLYINENGASLWWSPSPGGNVSSAAVAVLLDNGNLVVRDQGNSSLVLWQSFDYPGDAMLPGARLGLDKDTGKNVSLTFKSFSHNGSLGLDATRTNGFVLTTDGHANRGTFPEWMVSSEDNGSSLLLNRPETANGTEFLQFNLGQISLMRWSEPDPAANSTGGWVARWSFPSDCKSGGFFCGDFGACTDSGKCSCVDGFTPSYPIEWGLGYFVTGCSRSLPLSCGSGGLTEHEDSFAPLDKLQGLPYNGQDEVAGTDEDCRAACRSKCYCVAYSYGHGCKLWYHNLYNLSSAARPPYTKIYLRMGSKLRNKKGLQTRGIVLLVTGFIGIVSLVLISVLLWRFRRNSFGAGKFEVEGPLAVYSYAQIKKATMNFSDKIGEGGFGSVFRGTMPGSTAIAVKNLKVLGQAEKQFRTEVQTLGMIQHSNLVHLLGFCVKGKRRLLVYECMPNGSLDAHLFAEKSGPLSWDVRYQIALGIAKGLAYLHEECEDCIIHCDIKPENILLDAEFWPKIADFGMAKLLGREFNSALTTVRGTMGYLAPEWISGLPITKKADVYSFGIVLFEIISGRRSTEVVRFGNHRYFPVYAATHVSEGEVLCLLDARLEGDANVKELDVTCRVACWCIQDEENDRPSMGQVVRMLEGVLYTEMPPIPASFQNLMEGDNSVIYSDF
>HvleckRLK32
MLVEISYLKKCTVVLLIPSVLAIRCFAATTTRDSIALNESISDGQSLISSNSKFVLEFFSPGASSHRYIGIWYYSVPRGTAVWIANRNNPVQDKSGVLKFDDVGNLIVQNGTGSSFVVASGSGVGLRDREAAILDTGNFVLRSMANHSNTIWESFDYPTDTWLPGMNITLGNLLKSWKTYDDPATGDYTFGFGPSIVNDSASQFVINWNRNSFWTSAPWNGDTNSLIPELKSIGIIPVSFQCDNLTCMYTPNPAGIMSKIVLGQSGSLNITQFDLEGKLWTLLWRQPPSCDVSNLCGVYGVCNNSALSAPVSAQVSLCQCPEGFAQQDPSNSRKGCTRQTPLQCNGDRFIDMLNMTLPDYRQKLSVVEKSECEFACMKDCSCTAYAHSLPDGCSLWHGNLTNLQDGVEILHLRIAASELHGHKMLWLAYVLPSVAFLVFCLISYIWIRRWKNKGKGKQYDHPLVMASDVIKLWESEDTGSHFMMLSFSQIENATDNFSTENKLGEGGFGPVYKGNLPNGQDVAVKRLAANSGQGLPEFKNEILLIAKLQHSNLVGLLGCCIDGEEMLLIYEYMPNKSLDFFLFEQSRRVFLVWAMRLNIIEGIAQGLIYLHKHSRLRIIHRDLKPSNILLDTDMNPKISDFGMARIFDPKGGLANTKRVVGTYGYMAPEYAMAGIFSVKSDVYSYGVLLLEIISGLRNAAARGHGNSLNLLGHAWELWKEGRWRELIDKSLHGACPENMVLRCIHVGLLCVQENAADRPSMAEVISMITNENATLPAPKQPGFLSMLLPTEADVPEGSFSLNDLSITALDGR
>HvleckRLK33
MLVEISYLKKCTAVVLLIPSLLAIRCFSATTTRDSIALNESISDGQNLVSSKKKFVLGFFSPGASSHRYIGIWYNNIPNGTAVWVANRNDPVHDKSGVLKFDDVGNLILQNGTGSSFIVASGVGVRDREAAILDTGNFVLRSMTGRPNIIWESFASPTDTWLPTMNITVRNSLTSWKSYDDPAMGDYTFGFGRGIANTSQFIINWNGHSFWTSASWTGDMNSLIPDLTSMSTIPVSFQCDNSTCIYRPNPNEQMTKIVLDQSGSLNITQFDSDAKLWTLRWRQPVSCDVSNLCGFYGVCNSTLSVSVKASASASASEPVSLCQCPKGFAPQEKSNPWKGCTRQTPLQCTGDRFIDMLNTTLPHDRWKQSFMEEDQCEVACIEDCSCTAYAHSISDGCSLWHGNLTNLQWYGNLKNLQDGVESLHLRVAASELESSHSSGHKMLWIAYVLPSVAFLVFCLVSFIWFRRWKNKGKGKQHDHPLVMASDVMKLWESEDTGSHFMTLSFSQIENATDNFSAENKLGEGGFGPVYKGNLQNGQDVAIKRLAANSGQGLPEFKNEILLIAKLQHTNLVGLLGCCIDGEEMLLIYEYMSNKSLDFFLFEQSRRTILVWEMRLNIIEGIAQGLIYLHKHSRLRVIHRDLKPSNILLDNDMNPKISDFGMARIFDPKGGLANTKRVVGTYGYMAPEYAMAGIFSVKSDVYSYGVLLLEIISGLRNAAARGHGNSLNLLGHAWELWKEGKWRELIDKYLHGACPENMVLRCIHVGLLCVQENAADRPSMAEVISMITNENATLPAPKQPGFLSMLLPSEADVPEGSFSLNDLSITALDGR
>HvleckRLK34
CHADLKFMGCHSRIHSLARHPPRAHAESQAVLESQTTLVIGRPILMRARGERMRARGERMRAPARALLIVFAGTFLSISISIATDTIGHGASITGNQTLVSAGGTFKLGFYNPPGSSDARAYLGIWYAGIPEQTVVWVANRQNPVASSPGVLTLSPDGRLFIVDGRNTTLWSSAAPASARDITTKATAQLLDNGNFVVRGYDGSGSSQSVAWQSFDYPTDTLLPGMKLGVDLKSGIARNITSCTSPTDPSPGAYTFKLVMGGLPEFFLFRGPERIYASGPWNGVVLTGVQNLHTEGYTFTVVSNAEETYYAYYVSDPSALSRLILDGATGQLQSYVWGNGAWSSYWYHPNDPCDSYYKCGAFGFGVCEVGQPPKCSCLPGFKPRSPEQSDHRNGKGGCVRVTDLSCGAGDGFWPVNRMKLPEATNATVYADMTLDRCRHVCLANCSCRAYSAANVSGGINRGCVIWGVDLLDMRQYPVVVQDVYIRLARSEIDALNTEANRRRPNRSVVIPVVTTIFGVLLVVAVACCYYLRNNASTKRRTEMPPSRRGDVFPLGIRKRSALRTKQDQQLNGSRMSSEKDLELPFFDLEVILAATDNFSADSKIGQGGFGPVYMAKLEDGQEVAVKRLSKKSVQGVVEFKNEVKLIAKLQHRNLVRLLGCCIDDQERMLVYEFMHNNSLDTFIFDEGKRKLLGWKNRFEIVLGIARGLLYLHEDSRVRIIHRDLKASNVLLDKNMIPKISDFGIARMFGGDQTTAYTTKVIGTYGYMSPEYAMDGVFSMKSDIYSFGVLVLEIITGKKNRGFYDDELDLSLLGYSWKLWKEGRSADLLDEAMGGSIDYSVVLRCIQVALLCVEVHPKNRPLMSSVVMMLSSENATLPDPNEPGVNIGKSTDTDYSQTHTGTSFTGDAMNGR
>HvleckRLK35
MASFARYLLLIPLVLASTACHARDAVTPGRPLSANQTLLSVPGGKFVLGFFTPPGANNTYVGVWYGKVSVRTVVWVANREHPIPGDVASNHGATLSVSATGTLAIATGNSTVVWSVKPASALASPAARILDSGNLVLADAGGGVAWQGFDYPTDTLLPDMKLGIDLVKGRNRTLTAWKSPSDPSPGPVVMAMVTSGDPQVFIWNGDDLVWRSGPWDGVQFTGVPDTVTYSDFTFSFINNAQEVTYSFHVHNESIISRLGLNSTGNNGLLQRSTWVEAAGTWNLYWYAPKDQCDAVSPCGPNGVCDTNNMPVCSCLRGFVPKSPAAWALRDGRDGCLRATPLDCRNGTDGFLTLRHAKVPDTVRSAVDMSLSLEQCRQACLRNCSCTAYASGNVSADRRADGSGCVMWSSGLTDLRVYPDFGQELFVRLAAADLGAITSKSKKNHVIIAVVACVSVLAFLLALAGVFFWTRGKKKARNTGSSKWSGGSRSTPRQYDGSSHNDDLELPIFDLGTIAAATDGFSIDNKLGEGGFGPVYKGKLEDGQEIAVKTLSKTSVQGLDEFKNEVMLIAKLQHRNLVRLLGYSISGHERLLVYEYMENKSLDYFLFGNLSTFRFLTPNIG
>HvleckRLK36
MATRFSAAALPLLLGFLLLRGAPSRAADPDTVAVSRPLSGGHRLVSKRGKFALGFFQPAGSSQSWYLGIWYNQISKHTTVWVANRDAPVSDPASSQLSISSDGNMVLLHGDPVKSPVLWSTDVAGIASRSTVGVLLDTGNLVLTDASNTSVVLWQSFDHFGDTWLPGGKLGRNKRTGEVTRLFAWKGYDDPAPGVFALELDPNGTSQYLLNWNGSMEYWTSGNWTDDGFTGVPELKAYSNAPNSQYKFGYVDGEDESYFLYDVKDEAVVTRFLVDVTGQIKFLTWVESAGEWILFWTQPKVQCDVYALCGAFAACVENELPSCRCLRGFRERRSLAWLQGDHAEGCVRDTALQQCGRGGGAQGATRQTKNDDGFYSMPNVRLPSDARGVAAAATARDCEVACLGDCFCTAYSYNGSCWLWHGGLVNLQSTSSTGTGGGSGTILIRLAASELTGTGRTRTLIIALAVVAAAVAAVTVAVLVSVFVLRRRRVKAQGRVVEGSLMAFTYRDMQSVTNNFSDKLGGGSFGSVFKGSLPDATAMLVAVKKLEGVRQGEKQFRAEVSTIGTIQHVNLIRLLGFCSEGRRRLLVYEHMPNGSLDRHLFGPSPGHGILSWEKRYQIALGIARGLDYLHEKCRDCIIHCDIKPENILLDDAFAVKVADFGLAKLMGRDISRVLTTMRGTVGYLAPEWITGTAITAKADVFSYGMLLFEIVSGRRNVEQRPDGTVDFFPSTAASRLLDGDVKSTVDRQLDGDADIAEVERACKVACWCVQDEEGERPSMGTVVQALEGLVDVSMPPVPRMLKVLGDPDNYGKFFSGLPST
>HvleckRLK37
YLSEPGGCRQTNHTRIVAKSSNLHATMLLLLVLLLFSSLQLSTTAIDTLALGQALPWNETLVSKGGDFELGFFSPGNSGKHYVGIWYKKISKQTVVWVANREHPVVKPSTSRFMLSIHGELLLLTTPSDTLLWSSNASSRSPPSTTVATLQDDGNLVVRRSNTTSSSAYVVWQSFDHPTDTWLPGARLGYNRGAGVHSFLTSWTDAENPAPGPFTMEIDARGQPKFDLFSDAGGGEHRQYWTTGLWDGEIFVNVPEMRSGYFSGFPYARNGTINFFSYHDRIPMMGAGNFMLDVNGQMRRRQWSDMAGNWILFCSEPHDACDVHGSCGPFGLCSNATSPACQCPAGFLPRSEQEWKLGNTASGCQRRTLLDCTKDRFMQLPNPVQLPNGSSEAAGVRGDRDCERTCLKDCSCTAYVYDGTKCSMWKGDLVNLRALSIDQSGDPGLAGAVLHLRVAHSEVAASSSSPTHSWKKSMVILGSVVAAVVVLLASLVIGVVAAVMLRRRRGKGKVTAVQGQGSLLLLDYQAVRTATRNFSEKLGGGSFGTVYKGALPDATPVAVKKLDGLRQGEKQFRAEVVTLGVVQHVNLVRLRGFCSEGNKRALVYDYMANGSLDSYLFKSGGSAAKVLSWGQRYGVALGMARGLAYLHEKCRECIIHCDIKPENILLDDELGAKLADFGMAKLVGHDFSRVLTTMRGTLGYLAPEWLAGSPVTAKADVYSFGLVLFELVSGRRNNGQSEKGGYGMYFPVHAAVSLHEGDVVGLLDERLDKEADVKELERICRIACWCIQDEEADRPAMGLVVQQLEGVADVGLPPVPSRLHMLAKVNAGAIGGEPDEFDSESSNKLATEKA
>HvleckRLK38
MRRSVGPMALLLLLLPIALLAGGLREAAARTVPVEFLYPPYNLTYMHYIDTNGVFLRSPNATFSAAVFNSGSSDSSGADESQLTMSRYFFSVLHDRSRTPVWAAAAGATIVQSIILSLNASGLYISDPAGLSGPSWSTPRLAAPVAALRLLDTGQLALIDADNATLWSTFDAPTDTLLQGQLLPVAVPLTATASDQDLSPGAYRLLLTPADALLQWASSDGGGDFVTYWALSSDPASVQDSNRAVRSMMVNASGVFLLADGGGTVFSLRFASLTPAPATKMLLKVDSSGRLRALSTAYSPTAARATLPA
>HvleckRLK39
SMPPLYILLGLLLLHTPLWCFSAAAYEDSLTAGQVLAVGEKLVSRNGKFAVGFFQPAASIISKSYHSATSPSSSWYLGIWFNKIPVFTTVWVANRDQPITNHSVNLTQLKISSDGNLVIVNHAAKTESIVWSTHILNRKTSSINTTTSSSVVLLNSGNLALLASSQEILWQSFDYPTDIGLPGAKLGRNKVTGFSRQYISKKSLIDPGLGSYSIELKDTSGIVLMRRNNPLVKYLTYATTGSSTLIPILKSLLDLKPRTKGLINPIYVDNNQEEYYTYTLLDESSTSMFVLLDISGQVKLNIWSQSNQSWQTIYSEPADPCSPPATCGPFTVCNGNANPLCDCMESFSLKSPQDWEFEDRTGGCIRNTPLHCSTSGNNRNMTSSSDMFHPIAQVQLPYNPQIIDVATTQSKCEEACLVSCSCTAYSYNNSRCFVWHRELLSVNLNDGNDNNSEDVLYLRLAAKDLLPGSRKKKSKPNVGVITAASIIGFGLLMFVLLLLVWRNKFKWCGLPLYGNQGSAGGIIAFRYTDLVSATKNFSQKLGGGGFGSVYKGMLSESTITIAVKKLDGDRQGEKQFRAEVSSIGLIQHINLVKLIGFCCEGNHRLLVYEHMFNGSLDGHLFKKSNVDIAVLSWNTRYQIILGVARGLSYLHQSCRECIIHCDVKPENILLDASFVPKVADFGLAAFVGRDFSRILTSFRGTAGYLAPEWLTGVAITSKVDVYGFGMVLLEIISGRRNSSPEESYNTSSNSNQNVIYFPIQAISKLHGGDLKSLVDPQLHGDFNLEEAERVCKVACWCIQDNELDRPTMGEVVRVLEGQQEIDVPPMPRFLAAITEQSGAPTLM
>HvleckRLK40
IPSAKIDGVVSSCLLRHGPDPCIPXXXXXXXXXXXXXXXXXXXXXXXXXXXXLFPGATIVSDGGDFALGFFAPSSSAPANLHLGIWYNGVPELTVVWVANREIPVTNSTAPRLSLTNTSDLVLSDGNGSDTVVWRTSVAAAPNSTLSEAVLLNTGNLVVRSPDGTTLWQSFDYPTDTMLPGMKMVIKHGTRAGERLVSWKGPGDPLPGNFSYGSDLATFPQIFLWEGTRPVYRSTPWTGYRVKSEYQFQTTNTSSIIIYLAVVNDDDESYTVYTVSDGAWLTRFVLTYSGKLQIRSWNASSSAWAVLGQWPPYRCDLYGYCGPNGYCDDTALPVPTCRCLNGFEPARTEDWTSGTFSDGCRREEAVSGCGAGFLALPGMKPPDGFALVANRTPEGCAAECGRNCSCVAYAYSNLTGGASTGDMTRCLVWAGELVDTGKPGASPASDTLYLRLAGLDAPAGRRIKSNATRIILTALGSSVVIITCTFLAWLKFKGKNMKWGKQKKPKSDGSGDLEVPFVRFHEISHATQNFSETCMIGQGGFGKVYKGTLGGQQIAVKRLSWDSQQGTIEFTNEVALIAKLQHRNLVRLLGCCVEGDEKLLIYEYMPNKSLDDTLFGII
>HvleckRLK41
QHPSIHLDFFSSPTANLTPISMPHLLYILLGLLFMSHTVPWCSSARDTLMAGQALADAGGSKLVSRNGKFALGFFQPANTACTISGSKFHHNTSSSWYLGIWFNKIPVFTTVWVANREQPITHPQLNSTQLKISSDGNIVIVVNHSDAGKESVVWSTHIVNMTQTNNENCSSIVLLNSGNLALLTNSQEMLWQSFDYPTDVLLPGAKFGRNKVTGLSRSIISKKSLTDPSLGSYSVELEGTSGVVLKRRNNPSVVYWQYASSKQSSLILKSLVDLEPLGKRLINPTYVNNNQEEYYMYTCLDDSSSTYVSLDISGQIKLNYWLQVKQSWETIQAQPDDPCTTPATCGPFTVCNNNAYRLCDCMEGFSKKSPLDWESNDRTEGCIRNTPLHCSTSDKNITSSTDVFHRIAQVKLPYNPQIIVVSSNQRNCKEACLSSCSCTAYSFTNQVCSIWNGELLSVNLNYGTGNRVEDVLYLRLAANDFLLSSRENKTKPNIGVITAASVIGFGLLMLIVLLLIWRNRFKRFCLPLYDNQGSCGGIMVFRYTDLVHATRNFSEKLGGGGFGSVYKGVLSDMTSIAVKRLDNAYQGEKQFRAEVSSVGLIQHINIVKLIGFCSEGDKRLLVYEHMLNGSLDGHLFKKDTANVVVLSWNTRYQITLGVARGLSYLHHNCHECIIHCDIKPENILVDASFVPKVADFGLATLVGRDFSRILTTLRGTVGYIAPEWLSGVAITSKIDVYSFGVVLLEILSGSRNSPETYNTSKSYYIRYFPIQAINKLQGGDVRSLVDPQLHGDFNLEEAERICKVAFWCIQDNEFARPTMGEVVKILEGLREIDMPPMPRQLAAMKEHYDTTSSMYIVNMHSRCD
>HvleckRLK42
MRPSWGDLAVVWCCFLLLLLLPFLSHGKDMPLGSTLTPGGNSAAWASPNSTFSLAFAPSPTSPSLFVAAVTYAGGISIWSAGAGAPVDSGGSLLLSSTGDLQLVNGSGAVLWSSGTAGRGVSAAALQESGSLVLKNSTGGAVWQSFDHPTDTVVMSQNFASGMNLTSGSYVFAVDRATGNLTLKWANAGSATVTYFNKGYNSTFTANRTLSSPTLTMQTNGIVSLTDGTLNAPVVVAYSSNYGESGDMLRFVRLDSDGNFRAYSAGRGSGTATEQWSAVADQCEVFGYCGNMGVCGYNGTSPVCGCPSRNFQLNDASNPRSGCRRKVELQNCPGNSTMLQLDNTQFLTYTPEITTEQFFVGITACRLNCLSGSSCVASTALSDGSGLCFLKVSNFVSAYQSASLPSTSFVKVCFPGDPNPPVSAGSTSSSRSSGLRGWVVALVVLGVVSGLVLAEWALWWVFCRNSPKYGPASAQYALLEYASGAPVQFSYRELQRSTKGFKEKLGAGGFGAVYRGVLANRTVVAVKQLEGIEQGEKQFRMEVATISSTHHLNLVRLIGFCSEGRHRLLVYEFMKNGSLDSFLFGAGSNSNDSGKAMSWATRFAVAVGTARGITYLHEECRDTIVHCDIKPENILLDEQHNAKVSDFGLAKLINPKDHRHRTLTSVRGTRGYLAPEWLANLPITVKSDVYSYGMVLLETVSGHRNFDISEETNRKKFSVWAYDEYEKGNILPIVDRRLAGEEVDMAQVERALQVSFWCIQEQPSQRPSMGKVVQMLEGIMELERPPPPKSSDSFMTVTTATTGGSASGVSSSVASTFASSVAAPPAPVPSPNVEQEMSVGRSASARTREIASLPLRSSEPYMTM
>HvleckRLK43
GNDGNLLIQLPDGTVGWQSFDHPTDTFLPGMKVRVSHRTGKGDRIVSWRSPDDPAPGRFSYGLDPGTSLQLLMWNGTRPYWRSPVWKGYAVATMYVSAGTVIYTAIVDTDEEISLAFSVSGGAAPTRYVVTSSGKFQLLIWNGTRSAWATLQSWPSSECTTYRHCGAYAYCDTTAAPATCRCLDGFEPAKPAEWTSGRFGQGCRRKEALPPCGGGGGGNGVGFIAMPSMKVPDKFSLDAGNRSAEECAARCAGNCSCVAYAYANLQSSSAKGDVSRCIVWAGELVDAQMIDPRWGGETLYLRVPAAAASTSPGGKASRNAVKIAVPVVASALLLTCIFFVWFCRYRDKRRKTESQKKLMPGIRTGTTNTSSEIGEGDRTGDLEFPSIGFGDIVAATDNFSKTLMIGRGGFGKVYKGTLDGGHVVAVKRLSKDSDQGAEEFKNEAILIAKLQHRNLVRLLGCCTEGGEKLLIYEYLPNKGLDAILFDSGRKSVLDWPTRLGIIKGVARGLLYLHQDSRLTVIHRDLKASNVLLDAEMRPKIADFGMAKIFGDNQVKANTRKVVGTYGYIAPEYSTEGVFSDKSDVYSFGVLLLEIVSGIRVSATEGIMEFPSLISYAWHLWREGKAGKLVDPSMAGSCSQDEASLCIHVGLLCVEDDPSRRPLMSSVVSILENGSASALSLPTPVQPAFVEMMGEKSQRSDLENTRNTMAMTVLQGR
>HvleckRLK44
MAPLMFFLLLGQILLCTGVDTINSATPLSGSQKIVSQGSKFTLGFYSPPQTQSNTISFTSGNYYHIGIWYSTVPLLTPVWTATADVLVSDPTTASLEIAKDGNLVLRDHAKNRHLWSTNVSISSNSTMAIIRDSGSLDLTDASNSSMVYWRSVDHPTDTWLPGGKLRINRITGVSNRLVSWKNSGDPSPGLFSVELDPNGTAQFLIQWNESVNYWTSGLWNGKYFSHMPEGTSNFFDFQFVNNATEAYLFYSMKDDLQIWRFVIDESGQMKHLTWFDSLQAWFVLWAQPRAPCDVYALCGAYGSCTNTLNVSDTYCNCFKGFSQKVQSDWNLQDYSGGCKRNIPLQCQTNSTSAQTQSDKFYVMEDVRLPDNARGAVAKSSQQCQVACLNNCSCTAYAYSYAGCVVWHGDLINLQNQNSGEGRGTLLLRLAASELGYPKKRETVIIASTVGGAAVLLTALAIAVFFLFQKHLRDRTPRKSKNAEVALSDSRYNDLLDDILSIDSLLLDLSTLRVATNHFGEGNMLGKGGFGMVHKGVLPDGKQIAVKRLCKSSRQGIEELKSELVLVAKLRHRNLVSLIGVCLEEQEKILVYEFMPNRSLDTILFDSEKRKDLDWGRRFKIINGVARGLQYLHEDSQLKIVHRDLKASNILLDFDYNPKISDFGLAKIFGGDQSEDVTRRIAGTYGYMSPEYAMHGQYSARSDAFSFGVLVLEIVMGRRNNGSCNSEQHIYLVNLVWEHWTRGNVIELIDPCLSDHPSFHADQVMKCIQIGLLCVQNRHEDRPAMSSVNVMLSSQGARLPSVSMPAFSDGLHGRGDNNSKAASSNGMTITKIEPR
>HvleckRLK45
GEHATSYSCVQTRQQPRVTRSPSPSLLLIENSIHLKDNMSPTVAAFALVALCFAHSCPAAAAAELDAVSARRPLRGNDTVVSPQGKFEAGLFSPGSSGRFYLGVWYKNIPVQTVIWVANRASPLSSADSAELRVSADDGSLELVSPSEGVVWSSSRSNLSEESNNNNNTAVIRDDGNLVLLGGGNSSTVLWQSFDHPTDTLVPGAWLGENKLTGEYQRLTSWRNAEDPAPGMFSNTVDRNGTSEFFYFWNRTRVYWRSGVWTGRVFALVPEAVNNVLFNQTYVETPAYRRLSWALYDNATITRQVFEGTGQAKQYIWVPASQRWQFFWAAPTVQCDAYAVCGAFGVCDQRSQPSCRCPPGFVPASEQDWALSDWTGGCRRNSSLACARNGKGSSSTSTDGFLALPNVKLPDDSLAVGGAQSKTEYESACLENCSCQAYTFSGGGQCAVWHGEFRNLQQLYADSGASGSSDDLYLRLSESGLQDLSRANKKKEGPALQLVVGIVLACVAAALVASALLAWFLLSRRRRRRRLDSMANEVSSSLAVYSYGDLRAATKNFSDRLGGGGFGSVYRGVLKSGDTGTDVAVKKLEGLRQGDKQFRTEVNTLGRIQHVNLVRLLGFCSSADEKLLVYEYMPNGSLESYLFKGSGGSCPSWRDRYGIMLGVARGLAYLHDGCRERIIHCDVKPENILLDKDLCVKLADFGMAKLVGRDFSRALTTMRGTIGYLAPEWISGLPISAKADVYSFGMVLFELISGRRNADSSADGGGDDASDSMEVEEGRRASSTFFPVWAVGKVAAGEAGAVADPRLRGDVRGEELERACRVACWCIQDEEAHRPAMAQVVQALEGVVHVDMPPMPRMLQNLTLA
>HvleckRLK46
MGRPSPIRPLLLLAVLGALARLWRADAGTVRTELVAPDFEASYLLFIDTLGVFLRSSSGAFEAAVHSPAGQQDHYYLAVLHAPSGTCVWAANRAAPITNRAAPFRLSSAGVSAEDANGTVVWSTPPFASPVAALRLADSGNLALLDGRNGTLWQSFDRPTDSLVSSQRLPVGGFLSSAVSASDLAEGDYRLNVTAADAVLAWMGSLYWRLSGEAIAVKDRDGTVAYMAVNGTGIYLLAADDTVVVQAAMPPAGLRIVQLGVDGKLQISSFASANSSSSPMDGGIVAPSRGCALPLSCGALGLCTPNGNVSTCTCPPPFPTAHDNGCAPSVGSTLLPEGGYCGGGAGGGSMISYLSLGSGIAYYANKFSPPATAGSNASSCQALCTSNCSCLGYFYDSSSLSCYLAQNQLASFINTNSSNGAGMSGYIKVQSSQRSSSDSSSSNKTLIAILLPTIIAFVLVVVVGAIVIASRRNKDEQRVGRRASRSRDVQLRRQRSPGSASAHLVRDLDNEDDGDDDIVIPGLPTRFTHDEIEDMTNSYRTKIGAGGFGAVYKGELPDGSLVAVKKIEGVGMQGKREFMTEIAVIGNIHHVNLVRLRGFCTEGHRRLLVYEYMNRGSLDRPLFRPAGPLLEWKERVDIAIGAARGLAYLHFGCNQRIIHCDVKPENILLADGGQVKIADFGLAKFLTPEQSGLFTTMRGTRGYLAPEWLTNTAITDRTDVYGFGMVLLELVHGRKNRSEHVSDGGGGGEDSNSSNGTAGSSSRSGRNDYFPLVALEGHEAGRYAELADPRLEGRVVGKEVERMVKVALCCLHEDPHTRPSMAVVAGMLEGTMELGEPRAQALGFLRLYGRGFAGPSDGNVMKQAMVDDRARSETTMTTMSGWPSYMSSSQLSGAR
>HvleckRLK47
MDPLPLHTIIWLVCWSFWLFPFCASSGSRLLPDKPLSAGXXXXXXXXTFALGFFSLSSSSTKHYYVGIWYKNIPEDNCVWVANRAMPITDPSSATLAFTSESDLALSDTNGQLLWTTNISAAGNSSSEATGGIATLENNGNFILQSSHGIILWQSFDYPTDTLLPHMNLLPGMNLRLTHKTHALQRLISWRSPQDPSPGNFLYGADPDEFRQRFIWNGSTPYMRGSIWNKNLVVGQYVESIKSTIYYELRTIDDEIYASFGLPVPGVSLLQMKIDYSGKIKTRVWNSSRSKWTDLWSGPNQECNKFGYCGPFGYCDNTQPIVTCKCLDGFEPNNKQDWTASRFSQGCHRMEALRCGQGDGFLNMLTMKVPSQFLYVKNRSLDECIAECTSNCSCTAFTYTNMSIDAINGDETRCLLWIGDLIDMEKLIGQGETLYIRVNGLSDKKGKSIVLKITLPVVSSLLMIICVWLVWICNLGGKQRNKKIWKKLMSGTLSTSVELRDGNMKYPFISFKEIILATNNFSSSNMLGHGGFGNVYKGTLEDSTEIAVKRLSKGSGQGVMEFRNEVILIAKLQHQNLVRLLGFCIHGDEKLLIYEYLSNKSLHAMLFDATRKSMLDWPIRFEIIKGVARGLLYLHQDSRLKIIHRDLKASNILLDAEMCPKISDFGMARIFGGNQQQENTNRVVGTYGYMSPEYVLKGVFSVKSDVYSFGVLLLEIVSGSKISSVLLKADFSSIIAYAWSLWKDGNTKDFVDSPIVGGCSLDETLRCIHIGLLCVQGSPNARPLMSSIVSFLENGDISLPTPKEPMYFVENNYCADG
>HvleckRLK48
MDPLPIHIIICLVCWSFCLLPFYASSSSRLLPDKPLSAGSTITSDDGTFSLGFFSLSSSSTKYYYIGIWYRNIPEDNIVWVANRAMPITDPSSATLAFTSGFDLALSDTSGQLLWTTNISAARNSSSEATGGEATLDSNGNFILRSSHGTILWQSFDYPTDTLLPGMNLRITHNTHALQRLISWTNPQDPSPGNFSYGADPDEFRQRITWNGSTLYRRSLVWNNNLVVGKYVESIKSTIYYTQQIIGDEVYASFGLPIPSVSVVLMKIDYSGKMKTQIWNSNNSKWTDLYSGPNQECNKFGYCGPFGYCDNTQPIVTCKCFDGFEPNNKQDWMARRFSQGCHRMEALRCGQGDGFLNMSTMKIPDQFLYVKNRSLDECVAECTSNCSCTAYAYTTMRTNAIDEDDTRCLLWIGDLIDTEKFIGQGENLYIRFNGLSDKKQKGNVLKITLPVVSSLLIIICVCLVRICSFGGKQRNKKIWNKLMSGTSSTSIELHDGNLKYPFINFKEIVLATNNFSNSNMLGHGGFGNVYKATLEDGTELAVKRLSKGSGQGALEFRNEVVLIAKLQHKNLVRLLGFCIHGDEKLLIYEYLPNKSLDAMLFGDAIRKSMLDWPIRFEITKGVARGLLYLHQDSRLKIIHRDLKASNILLDAEMSPKISDFGMARIFGGNQQQENTNRVVGTYGYMPPEYVLKGVFSVKSDVYSFGVLLLEIVSGSKISSVHLKADFPSIIAYAWSLWKDGNTKDFVDSSIVDSCSLNEIIRCVHIGLLCVQGSPNARPLASSIMSFLENGDISLPSPKEPVYFAEDNYGTDG
>HvleckRLK49
MDPLPIHTIICLVCWSFWLFPFCASSGSRLLPDKPLSAGSTITSNGGTFALGFFSLPNSGTKQYYVGIWYKNIPEDNIVWVANRAMPIADPSSATLAFTNGSDIALSGTNGQLLWTTNISATRNSSSEATGGEATLENNGNFILRSSQGNILWQSFDYPTDTLLPGMNLRVTHKTHALQRLISWRNSQDPFPGNFSYGADPNEFLVRYVWKGSKPYWRSAVWNNYLVVGQYIKSIKSTFYLTMQTIDDEVYISFGLPVPSVSSVVLVKMDSSGKIKTRVWNSNMSKWTDLGSEPNQDCNKFGYCGPFGYCDNTQPIVACKCLDGFEPNNKQDWTAHRFSQGCHRTESLRCGQEDGFLNMPTMKVPNQFLHVKNRSLDECIAECTSNCSCTAYAYTNMSTNAINGDGIRCLLWIGDLIDTEKLHAQGENLYIRINGLKDKKRKSTVLKITLPIASSLLITICVCLVWICNLGGKQRNKKIWKNLMSGTSSTSVELHDGNLKYPFISFKEIVLATNNFSNSNMLGHGGFGNVYKGTLEDGTEIAVKRLSKGSGQGVLEFTNEVILIAKLQHKNLVRLLGFCIHGDEKLLIYEYLPKKSLDAMLFDATLKQLLDWPIRFEIIKGVARGLLYLHQDSRLKIIHRDLKASNILLDAEMSPKISDFGMARIFGGNQQQENTNRVVGTYGYMSPEYALKGVFSVKSDVYSFGVLLLEIVSGSKISSVHLKADFSSIIAYAWSLWKDGDTKDFVDSSIVGSCSFNETIRCIHIGLLCVQDSPNARPLVSSIMSFLENGDILLPPPKEPMYFAENNYGADGEAENTVNSANTMSITALKGR
>HvleckRLK50
MDWSSLTCSAIVLIILFLPFGASDDRLVPGKPLTPGTTIVSDGGDFALGLFSSGSMQSNLYLGIWYNGIPELTMVWVANRETPLTNSTSSAPTLSLTSTSNLVLSDGDGSRVVWTTDVASSSSSSPEAVLLNTGNLVIQSPNGSRVWQSFDHPTDTFLPGMKMRIRYRTRAGERLVSWKEAGDPSPGSFSYGCDPATSIQMFLWDGSRPVYRSTPWTGFQVKSEGEHLITNTSAIVISLAFVNTDEESYTMFSVSEGAWHTRFVLTYSGKLQFQSWNSSSSAWVVFGQWPRHKCNHYGYCGLNGYCDETVSPIPTCKCLDGFKPTSTEEWDNNKFWKGCQRREALQCGDGFVPLSGMKPPDKFMLVGNTSLKECAAACSRNCSCMAYAYANLSSSIASGDMTRCLVWVGELVDIGRLGSSTASDTLYLRLAGLGAASGKRTRSNAVKVVLPVLGSIVLILVCISIAWLKFEGKDNQEKHKKLPSDGSSGLEFPFVRFEEIALATHEFSETCMIGLGGFGKVYKGTLGGQEVAIKRLSMDSQQGVNEFKNEVILISKLQHKNLVRLLGCCEKGDEKLLIYEYLPNKSLDATLFDDSRKHLLDWGTRLTIIKGVAKGLLYLHEDSRLTIIHRDLKAGNVLLDAEMKPKIADFGMARIFGDNQENANTQRVVGTFGYMAPEYAMQGIISTKSDIYSFGVLLLEIVTGMKRSSTSHARGFPSLIIYSWNMWKDGKAEELADSSIIDTCLLDEVLLCIHVALLCVQENPKDRPHMSSVVFTLENGSTTLPIPSRPAYFLGQSTELEQLRNNIQNSVNTLTLTGIEGR
>HvleckRLK51
MFVEALKKPTASSLIRNRSHLSQRTSMTGWFLKIAANWKGSPSIHMNARRECHGSPLCFIMLWMLVLPNLWIICSGSIQKYVLLPGFSGSEMDYIDNNGIFLLSNGSVFGFGFASTSASESTSYLLQVVHLGTNTVIWTANANSPVLHSDSFEFDKDGKAYLQSAGSSVWTANISGKATSIQLLDSGNLVVLGEDSSSPLWQSFSYPTNTLLSGQSFNDGMTLVSHSTRQNMTHTLQIKSGDMMLYAGFQKPQPYWSALQDNRLIVNKDGAIYSASLNATSWYFYDKSGSLLSQLLIAQQGDTNTTLAAVLGEDGSIAFYMLQSANGKTNLPTPIPQDSCDTPTHCNRYSICNSGTGCQCPSALGSPPNCDPGLISPCKSKEAFQLAQLDSGVGYIGTSFSSPVPKTNITGCKNTCMGNCLCIAVFFDQKTGDCFLFDQIGSLQHKDAGKTNFSSFIKVPSSGSGQAGSGSGNGNHNIIIVVIIVGTLAVIGGLIYVGFFIYKRKRYPPSSQEGAGSSEDDGYLQTISGAPVRFTYRELQDATNNFINKLGQGGFGSVYLGALPDGSRIAVKKLEGIGQGRKEFRSEVTIIGSIHHIHLVKLRGFCAEDSHRLLAYEYMAKGSLERWIFCTKEDDPLLDWDTRFNIALGAAKGLAYLHQDCESKIIHCDIKPENFLLDDNFVVKVSDFGLAKLMSREQSHVFTTMRGTRGYLAPEWITNYAISEKSDVYSYGMVLLEIISGRKNFDPVEGSEKAHFPSFAFKKLEEGDIREIFDAKLKYNDKDERLEIAIKVALWCIQEDFYQRPSMSKVVQMLECVCDVPQPPVSSQIGYRLYANAFKSSSEEGMSSGMSDYNSEALLSAVRLSGPR
>HvleckRLK52
MYPPKILTLLFFLPLTYSSSRLTMNKSFALNAELGTIWRNNPSLLHNISPDDNFSLRIILPKEAFMTSVNSYYNSIPSFACGFFCAGAVSTCDDYIFSVLFVSVYSFHAEVYFHSPEVVWSANRDHPVKENASVQLTELGDLVLYDADGTQVWSTNTTEMSVVAMNLTRTGNLVLLNHVNTEIWRSFDHPTDTLVTGQVLQVGQKLMASTSMENRASGIFYLTVLPDGMYAFAGTDTPLAYYQSPTGGTVMTNKSAYVALKDGSLEVFTCFRDTEAPDYQIQLPRDNDGPVFVRLEFDGHLRLYQMPNNSWASSDVFDITDPCDYPLACGGYGICSNGQCSCPDAAIGQSGLFELIDQRELNRGCSPIVSLSCDSAQKPRLLSLPNITRFSGVYNWTTSEEQCKLSCLNACSCKASFFQQYDTSTGFCFVASDMFSMISVNAQSYSSNFSSLAFVKVGARHKSVLSKGKTAIVTVVASSLIASVIGAVLVVLRRKRGGPLEYEDIINQLPGLPTRFSFLKLKSATGDFSTKIGSGGSGSVFEGQIGDMHVAVKRLDGMSQGEMEFLAEVQTIGTINHVHLVRLIGFCAEKSHRLLVYEYMPNGSLDRWIFEKHQEAPLDWKTRLRIIADVAKGLAYLHSDCRQTIAHLDIKPQNILLDEQFTAKVSDFGLAKLIDREQSSVMTRLRGTPGYLAPEWLTSVINEKVDVYSFGIVITEIICGRRNLDYSQPEERLHLVSVLQDKAKNDQLLDLIDPRSTDMQYHLDEVSRMMNLAMWCLQVDSRRRPSMTEAVKILDGTMDVETELDLDLVNL
>HvleckRLK53
MATLHMFLSLLLLIPVHTIPPTTATKDDTLSPGQALAVGDKLVSSNGKFALGFFQPGTGNISSKSSSTSPGWYLAIWFNKINVITPVWVANRERPIAGPDLRATQLQISEDGNLVVLNNASQSVVWSTHITSSNRTNTTSTSSSRRAILLGSGNLVIESPSSEVLWQSFDDPTDVALPGAKIGWNKVTGLNRVGISWKSRIDPGLGSFSVGLETNGTRMVMVGHRGYPSQVYWSWSPDESPMQMPALRALLQMNPQTRGLVVPEYVDNSEEEYYMYTSPDEASSTFLSLDTSGQTKLNVWSQANQAWQTIYVQPIDLCRPYATCGPFTVCTGSSQPPCECMESFFRTSPQDWELGDRTGGCSRRTPLDCNGNRSSTDVFHPVARVTLPYGPRSSQGAPATRGECESVCLSNCSCTAYSYQGSKCSVWLGELFSVNKDDGIEIRSEYTLYIRLAAGDFPSSTRDKRKPALAGVVIAATASVIGFGLLMLMLLLVILRNRFNWCGMSSQASNKDSVGVVAFRYADLGRATKNFSVKLGAGGFGTVFKGVLSDLTSVAVKRLEAASQGEKQFRAEVSALGLIQHINLVKLVGFCCHGDKRLLVYEHMCNGSLDSHLFQSNGTVLDWSTRYQIAIGVARGLSYLHQSCHECIIHCDIKPENVLLNESFVPKIADFGLASVIGRDFSRVLTTFRGTMGYLAPEWLTGVAITSKVDVYSFGMVLMEIISGRRNASVVHTSGSDHVAYFPVQAINKLHEGDVQSLVDPQLYGDFSFDEVKRVCNVACWCIQDNELDRPTMGEVVRVLEGVKELDMPPMPRLLAAITTECSYVDSM
>HvleckRLK54
LSTQSTFAALARQVSARPHRQFTMPLHLIFFTLLLYLHIPASSAATDTILAGQTLGVNDKLISSNGRYALGFFETSRKSSGSTPNWYLGIWFNTVPKFTSAWVANRDKPIKNSTSLELAISHDGNLAILNRSSKSIMWSTQASITRNSTTAVLLSSGNFILANSLNLSEVFWQSFDHPTDTFFPGAKLGWDKVTGINRRLVSSKNSISPASGIYCTEIDPSGINQFWLAPLNSLVPYWSSGVWNGKYFASIPEMAAHSIFSSIFVSNDQEKYYTYNLEDETMVTRQVHDVSGRSKLFIWLKGSQDWVMIYAQPKAQCDVYAICGPFTICNDNALQYCDCMEGFTITSPEDWELEDRTGGCSRNTPLDCNISNKSTTHTTDKFYPVPCVKPPHNARKVEEAASTSKCAQACLNNCSCTAYSFSNSGCSIWNNELLNMRQLQCGGATNSNEETIYLRLSAKDIKSLKNNRGGFVIRIAIGTGFSALGLFSLFLLLMIWRNKRKSSDLILNGAQGSNGIIAFRYTVLQGATKKFTDQLGAGSFGSVYKGFINDSIAVAVKRLDGAYQGEKQFRAEVSSIGAVQHINLVKLIGFSCEGSKRLLVYEYMSNRSLDIHLFRNNSTILSWTGRYQIALGVARGLAYLHESCRDCIIHCDIKPENILIDASFTPKIADFGMAKLLERDFSRVLTTMRGTAGYLAPEWISGVAITPKVDVYSYGMVLLEIISGRRNSCTSCPGGGNADVYFPVHAAHKILEGDVGCLVDHILHGDVNLDEAELACKVACWCIQDDELDRPTMGQVVQILEGLVETTMPPIPRLLQAMAGSSHSTRS
>HvleckRLK55
MHLLAYFALLLFLCIQASSAATNTILAGQALVVNDKLVSKNNRYALGFFQTSSSKSSQDTNWYLGIWFNTVPTVTSAWVANRDKPIKNIASMELTVSQDGNLVILNRSTKSIIWSTKVNITRNSTTAVLLSNGNLILTNSSNSSEVFWQSFDHPTDTIFPGAKLGWDKVIGLNRRLVSSKNSISPASGAYCTELDPTGASQFWLAPVNSTVPYWSSGAWNGIYFTSIPEMAAKSTFSSRFVSNNQETYYSYNLEDEDMIARIVLDVSGRSKVFIWLEGSQEWTMVYAQPKAQCDVNAICGPFTICDDNALQYCNCMEGFTITSAEDWELEDRTGGCSRNTPLDCISNKSTTRTTDKFYSVQCVKFPQSATKVEAAASTGECARGCLNNCSCIAYSFHDGGCSIWHNELLNIRQLQCGGTTNSNEETLYLRLSAKDFQRLEDNKKRIVIGVAVGAGISALALFALILLLLFWRNKRKNSGRRLHGVQGCNGIIAFRYNDLKCATNKFKDRLGGGSFGSVFKGLIDDSTAIAVKRLDGAYQGEKEFRAEVSSIGAIQHINLVKLVGFCCDGSKRLLVYEHMPNRSLDVHLFRNNSTILSWTIRYQIALGVARGLAYLHESCRDCIIHCDIKPENILLDTLFVPKIADFGMAKLFRRDYSRVLTTIRGTIGYLAPEWITGVAITPKVDVYSYGMMVLEIISGKRNSCAPCSSGGNLDIFFPVHAAHKLLEGDVGSLVDHMLHGDVNLDEAELACKVACWCIQDNELDRPTMGHVVQILEGLVEIGMPPLPSLLESMTGSSHSARS
>HvleckRLK56
MHLLPIVFTLLFFLRAPASSVTTDTILAGQALAVNDKLVSKNGRYALGFFNTSSSKPSQDTTNWYLGISFNTVPKFTSAWVANRDKPIKNTTTPELTISHDGNLVIINQSTKSIIWSTQANITRNSTTAMLLSSGNLILTDSSNSSEVLWQSFDHPTDTLFPGAKLGWDKLTGLNRRLVSWKNLNDPTTGLYCDGLDPSGLNQFLLTALNSSIPYWSTGVWNGKYFASLPEMKASNPVFTATFVSNNREKYSTVNVVDESMVTRNVIDVSGQRKTFIWLEGSQDWTMIYAQPKLQCDVYAICGPFTICNNNALPHCKCMEGFTITSPKDWELEDQTSGCSRNTPLDCISNKSTTHSTDKFYSVPCVELPQNTLKVEAAASTNECARICLRNCSCTAYSFTDERCSIWHTELLNIRALQCSGTTNSTGETLYLRVSANDFHRLKNNRKGIVIGVATATGISVLCLFALILLVMIRRNKSKSSSRILDGVQGCNRIIAFRYTDLQRATTKFTDKLGAGSFGSVFKGFLNESTAIAVKRLDGAYQGEKQFRAEVSSIGAIQHINLVKLLGFCCEGSKRLLVYEHMPNRSLDVHLFGNNSTTLNWTVRYHIALGVARGLAYLHESCRDCIIHCDIKPENILLDDSLISKVADFGMAKLLGREFSRVLTTIRGTMGTLHLNGSVVLPLHQKLMCIATG
>HvleckRLK57
MSIQLGWQLCLTVETAVIYCSMTRPLSNHPVLAASASATSRDPLQFIMHILIDTALLLFLYISACSAATSDTILSGQALAVNDKLVSNNGRYALGFFETNSSKSSQGTTNWYLGMWFNTVPKFTSAWVANRDKPIKNITSSELTISQDGNLVILNRSTKSIIWSTQANIKRNSTTAMLLNNGNLILTDSSNSSEVLWQSFDHPTDTFFPEAKLGWDKLTGLNRRIVSWKNSINPATGVYRYELDHSGANQLFVGPLSSSAPYWYSGAWNGKYFELMPEMAENKIWRSKFVDTRHEKYYTYSLAQAKRITHHVIDVSGQVKVFVWNERSQYWQNVFAQPRSPCDVYSICGPYTICNDNAALNCDCMKGFTITSPKDWELGDRTGGCSRKTLLDCISNKNTTHTTDNFHSVPCVGLPQNAANVEAAKSANECAQFCLNNCSCTAYSFSNSGCSIWHNELLNIRQLECSGILGQLRLSAKDIQSLETLHLRLSAKDIQSLENNRKRIAIGVATGIGVCALGLFGLSILVIIWRNKRKSSGRILNDGCNGIIAFRYTDLLRATKKFTEKLGRGSFGSVFKGLINDSVSIAVKRLDGAYQGEKHFRAEVSSIGAVQHINLVKLVGFCCEGSRRLLVYEYMPNLSLDVHLFQNNSTVLSWTARYQIALGVARGLAYLHESCRDCIIHCDIKPENILLDASFLPKIADFGMAKLLGRGHSRVLTTVRGTAGYLAPEWITGVAITPKVDVYSYGMVLLEIISGRRNSCGPCTTDGDLDVYFPVHATHKLLEGDIESLLDQKLDGNVNLDEAELVCKVACWCIQDKEVARPTMGEVVQILEGLVDIRMPPIPRLLQAIGGSSHST
>HvleckRLK58
MSLMTMATLMALACLCLAPAVGAPATVSARRPLRDNDTLVSAQGKFELGLFTPAGSSDGRFYLGIWYKNIPGQTVVWVGNRASPLSGVASAELRVSAEDGNLELVGPTAASASPVPVWSSNLSSSSSTPGSNNTAEIRDNGNLVLLDGGNTSKVLWQSFDHPTDTLIPGAWLGENKLTGEYQVLTSWRSAQDPAPGMFTDTVDPNGTSEFFYMWNQSRTYWRSGVWTGRFFATMPEATRNILFNQTYVETPTYRRVSNALYNNATITRLVLELTGQTKQYTWVPASQNWQLFWAAPTVQCDVYALCGAFGVCDLSSQPSCRCPPGFAPASEGDWTLSDWSGGCRRSVPLWCPHNGSTTDGFLTLPNVKLPNDSDLLAVGAAQSKAECESACQNSCSCEAYTFSAGRCAVWHGELRNLQQLYADSGVSRSSDLYLRLSAIGLRDLHSSGRKGGRSSWLVRGMTLLGVVALCASVILAWRILVARRRRRLVHMANEKDKGSSLTVYSYGELQAATNNFSERLGGGGFGSVYRGVLKQQKGGNTTQVQVAVKKLESLGRQGDKQFRTEVSTLGLIQHVNLVRLLGFCSSSNEKMLVYEYMPRGSLDRYLFRAGACPSWRDRYCIMIGVARGLAYLHHGCRECIIHCDIKPENILLDEDMSPRIADFGMAKLVGRDFSRALTTMRGTIGYLAPEWISGQPISAKADVYSFGMVLFELISGRRNSERCSEVDDVAGTGRCGSSAFFPVWAAGKVLEGEVGTVADPRLRNDVVPEELERACRVACWCIQDEEAHRMTMAQVVHALEGTIHVHTPPVPRALQNLVKLT
>HvleckRLK59
MSLMIMATVVALALCFAPAMGAAATVSARRPLRGNDTLVSAQGRFELGLFSPAGSSGDRFYLGIWYKNIPGQTVIWVGNRASPLSGLASAELRVSADDGNLELVGPTGASASPVVVWSSNRSSSSSLSSSPGSNTAEIRNDGNLVLVDGGNYSNVLWQSFDHPTDTHVPGAWIGENKLTGEYQTLTSWRNAQDPAPGMFTDIIDPNGTSEFFYMWNRSRAYWRSGVWTGQIFERLPDATESITSYEETPAYRRLTNVITDNATITRLVLDLTGQAKLYIWVPATQSWQLFWSAPTMQCEVYALCGAFGVCEHRSQLPCRCPPGFAPVSEEDWTLSDWSGGCRRSSPLTCAHNVSMMDGFLALPDMKLPDGSLAVGAAQSKAECESTCQNSCSCQAYAFSSGGGGCTVWHGEIRNLEQLYADSGVSGSELHLRLSQEGLDILHGADSKKRERTLWFVLGIPFAGVATLGASVILAWRFLLARRRRLASMEYEKGSSLTVYSYEDLRATTKNFSERLGGGSFGSVYRGVLKRHEGDNAIQVQVAVKKLEGLGGQQGDKQFRAEVSTLGLIQHVNLVRLLGFCSSGDEKMLVYEYIPRGSLDRYLFDDGGMNLSWRERYRIMIGVAKGLAYLHHGCHECIIHCDIKPENILLDEDMSPRIADFGMAKLVRRDFSHALTTMRGTIGYLAPEWISGQPINAKADVYSFGMVLFELISGRRNSKGYSEVEAIGSESSDSWTFFPVWVAGKVMEGEVSAVIDSRLRGNVTPEELERACWVACWCIQDEEARRPSMAQVVQALEGVVQVHAPPVPPALQHLVTLT
>HvleckRLK60
MPLIIATLASLALCFAPAPGAAATVSARRPLRGNDTLVSAQGKFELGLFSPAGSSGGRLYLGIWYKNVPVQTVVWVGNRAAPLSAVASTELRVSTEDGNLELVGPTSASASPVVVWSSNLSPSLPGSNTAEIRDDGNLVLLAGGNTSNVLWQSFDHPTDTLVPDAWVGENKLTGEYQTLTSWRNAQDPAPGMFTDTVDPNGTSEFFYMWNHSRTYWRTGMWTGRTFATMPEVRNNVLVNTTYVETPAFRRVSDILYDNATIARLVLDLTGQAKRYIWMPGSQSWQLYWAAPTLQCDVYALCGVFGVCDQRSQLPCRCLPGFAPASEVDWTLNDWSGGCRRSSSLTCANNGSTTDGFLPLPDVKLPDGDSLAVGAAQSKAECESTCQSNCSCQAYAFSAGAKGCTVWHEEIRNLEQLYADSGVSGSDLHLRLSQEGLDILHGADSKKRGRRLGLVVGIPLAGLAALGASVILAWRILLAGRRRLASMENEKGSSLVVYSYSDLRAATKNFSERLGGGSFGSVYHGVLKGGHKGDNAIQHQVAVKKLESLGRQGDKQFRTEVSTLGLIQHVNLVRLLGFCSAGDEKMLVYEYMPRGSLDRYLFGGGASLSWRERHCIMVGVARGLAYLHHGCHECIIHCDIKPENILLDEDMSPRIADFGMAKLVGRDFSRALTTMRGTIGYLAPEWISGQPISAKADVYSFGMVLFELISGRRNSDGYSMVEVAGSGNSDSWTFFPLWAAGKVVEGEVSAVADPRLRGNMRPEELKRACWIACWCIQDEEAQRPTMAQVVQALEGAIQVHAPPVPRALKHLVTLT
>HvleckRLK61
MARVAATFMALACLCLAPAVGAPATVSARRPLRGNDTLVSAQGNFELGLFSPAGSSGDRFYLGIWYKSIPGQTVAWVGNRATPLSGLASAELRVSADDGNLELVGPTSASSLPVVVWSSNLSSSSLSSTPGSNNTAEIRDDGNLVLVDGANSSNVLWQSFDHPTDTYLPGAWLGENKRTGEYQALSSWRNAQDPAPGMFYDTVDPNGTAEFFMLWNRSRVYWRGGVWTGGRWSGDVGAATGRGTNLYNTTYVDTPAFRGTTTVLSDNATITRLVLDLNGQKKQFVWVPASRSWQLFWAAPTAQCDAYALCGNFGVCNQRSQLPCRCPPGFAPVSERDWTLSDWSGGCRRSSPLTTCAHNGSTTDGFLALPDVKLPDEPLAVGTARSKAECESTCQNNCSCQAYAFSAGCTVWHGDIRNLEQLFADSSSPGSDFYLRLSQRALQDLHNVHKKKEGTKLWLVVGITLTGVAALGASVILAWRILLARRRLAVSMENENGSSLAVYSYGDLRAATNNFSERLGGGGFGSVYRGVLKQQKGGNTTQLQVAVKKLEGFARQGDKQFRAEVSTLGLIQHVNLVRLLGFCSSGDEKMLVYEYMPRGSLNGSFFDGGACPSWRDRYRVMIGVARGLAYLHDGCRERIIHCDIKPENILLDEDMSPRIADFGMAKLVGRDFSRALTTMRGTIGYLAPEWISGQPISAKADVYSFGMVLFELISGRRNSERFGELEAAGTFFPVWAAEKVVEGEVGAVADPRLHGDVMPEELERACRVACWCIQXXXXXXXXXXXXXXALEGAVVVHAAPVPRALQRLAT
>HvleckRLK62
MACIPILILLSLSSFCKSDDQLTYAKPLASGETLVSKGGDFALGFFSPTNSNSSLYLGIWYHSIPNHTVVWIANRNKPITSSVSPKLAITNTSGLILSDSQGQTVWATNNKITAGVTGVAAVILDTGNLVLRSSNGTVIWQSFDHPTDTLLPGMRFVLSYKNRVVGRLVAWKGPDDPSNGDFSFGLDPSSNLQLVIWHGTKLYYRTMVRNSITVGGGTYRSNTTSIFYQTAADVGDEYCYVYTVSDGSPYVRAMLDYTGKMKTLSWSNSLSSWTVIGEVPTACDFYSSCGSFSYCDFTATVHTCQCLDGYEIDGLDFSRGCQRMEPLKCGKPNHFVALPVMKVPANFLHIKNRSFDQCTAECSSNCSCTAYAYANLSSDGTFEDPSRCLVWTGELVDTWKFSNNGENLYLRLADSPDQKNNLVKVVPPIIASLAILTCTAFVTVCIYRGKWRNKEIEQRQMLRYVSSSNEIGGEYVGFPFVSFQDIATATDNFSDSNQIGRGGFGKVYKGLLEGGKEVAVKRLSEGSRQGIAEFKNEIVLFAKLQHKNLVRLLGCSIHGDERLLIYEYLPNKSLDVFLFGAARQSVLDWPTRFKIIKGVARGLLYLHQDSRLTIIHRDLKASNVLLDTKMNAKISDFGMARIFGENQQHAKTTRVVGTYGYMSPEYVMGGAFSVKSDTYSFGVLLLEIVSGFKISSSELMTNFSNLIAYAWRLWEDGKAAELVECSVRERCPLEEALRCIHVGLLCVQNYPDDRPLMSSVIFMLENGSALVPAPKKPAYYALGNREVAETTEQMENSANGISITTLDGR
>HvleckRLK63
GINGEQSRRRAHPLPSPSSRFTSIPRENRAEQKETLPLARVGGGETDHRSKKQREGPAMAMPLTVAVAVALAALLLSAAAAPALAHTSSCPDGWQIGPDRLKCFMHISSSLSWDGSEALCRNFSAHLAALSSVQELNFARSLCGAASSGCWVGGRRRNTSSGVVGWKWSDNSSSWNETAFPGEPLHPNCTGARCGLATSDDMCTLVTSKHTALTGKKCAESHGLICMMNHEDRCYHDHCHKEYFIVLIVVSGLILSTTLAVVVWLLVYKRSKKRKRSREASGTSATALVPPLWKVFNSEELRSITKNFSEGNRLPGNAKTGGTYSGTLPDGSKLAIKRLKRSSLQRKKDFYSEISRVAKLYHPNLVAVKGCCYDHGDRFIVYEFVANGPLDVWLHHIPRGGRSLDWATRMRVATTLAQGIAFLHDKVKPQVVHRDIRASNVLLDEEFGSHLMGVGLSKFVPWEVMHERTVKAATYGYLAPEFIYRNELTTKSDVYSFGVLLLEIISGRRPAQSVESAGWQTIFEWATPLVQSHRHLELLDPLINDLPEIGVIQKVVDLVYACTQHVPSVRPRMSHVVHQLQQLELKSAASEQLRSGTSTSATSPMLPLEVRTPR
