# Supplementary material for: Genome-Wide Comprehensive Identification and In Silico Characterization of Lectin Receptor-Like Kinase Gene Family in Barley (Hordeum vulgare L.)
Source: Genet Res (Camb). 2024 Feb 27;2024:2924953. doi: 10.1155/2024/2924953 (PMC10914435; doi:10.1155/2024/2924953)
Supplement: Supplementary Materials — S1 Data: protein sequences of HvlecRLKs (txt). S2 Data: CDS sequences of HvlecRLKs (txt). S3 Data: genomic sequences of HvlecRLKs (txt). Supplementary Table 1: miRNA targeted HvlecRLKs (Doc). [file 2924953.f1.zip › S2 Data. CDS sequences of HvlecRLKs.txt]

>HvleckRLK64
ATGGTCAACTCCGAGCTCGGCGACCCGAGCGACAACCACGTCGGGCTGGACCTCGGCTCGCCGGTGTCCGTCAGCGCCGTCGACCTCGTTGACTCCGGGATCGTCCTCAAGAGCGGCAACCTCACCACCGCGTGGATCGATTACCGCGGGGCCGAACACCTCCTCGAGGTGTCGCTGAGCTACTCCGGTGTCAAGCCGAAGCGGGCCGTCTTCTCCGTGGCCGTCGACCTCTCGCCGTACCTCAGGGAGGCCATGTACGTCGGCTTCTCGGCCTCCACGGAGGGGAGCACCCAGCAGCACACCATCAAGGAATGGACCTTTCAGACCTTCGGGTTGCCGCCGGCGACCAACGCCTCCACCTTTACCAACGCCACGAGCAATGTCTCGGAGCCAGCAGTGCCCGGCGTGGCCGCCGCGAGCGGCGGCGCCACCAGCAAGAAAAGGTTTGGGCGCGCCATCACCATCCTCGGCCCCGTCGCGCTCGCCGTCGCGTTCGTGTTCTTCGCATGTGTCTCCGTCAAGAAGCTGGCAGAGCTCACCTCGAGGAAGGACGCCATCTTCCTGCCGGGGCTGCTCAAGGGGCCAAGGAAGTTCAGCCACAAGGAGCTGAGCGTGGCGACCAGAGGATTCCACGCGAGCAGAGTCATCGGCAGAGGCGCGTTCGGCACGGTGTACAAGGCGGCCATGCCGGGCGCGGCCACCACCTACGCAGTGAAGCGGTCGACGCAGGCGCACCAGAGCCGGAGCGAGTTCGTCGCCGAGCTCTCCGTCATCGCCTGCCTCCGCCACAAGAACCTGGTACAGCTGGAGGGCTGGTGCGACGAGAAGGGCGAGCTGCTGCTCGTCTACGAGTACATGCCCAACGGCAGCCTGGACAAGGCGCTGTACGGCGACCCCTGCACGCTCTCCTGGCCGGAGCGCCACAACGTGGCCGCCGGTATCGCGTCCGTGCTGTCCTACCTCCACCAGGAGTGCGAGCAGCGCGTGATCCACAGGGACATCAAGACGGGCAACATCCTGCTCGACGGTAACCTCAGCCCCCGGCTGGGCGACTTCGGGCTCGCCCGGCTCATGGACCACAACAAGAGCCCGGTGTCCACGCTCACCGCCGGCACCATGGGGTACCTCGCGCCGGAGTACCTGCAGTCCGGCAAGGCCACCGACCAGACCGACGTGTTCAGCTACGGCGTGGTGGTGCTGGAGGTGTGCTGCGGGAGGCGGCCGATCGACAGGGAGGAGACCGACAAGGATAGCAAGAACGTAAACCTGGTGGACTGGGTGTGGCGCCTGCACGGCGAGGACCGGCTCATCGAGGCCGCCGATGCGCGGCTGAACGGCGAGTTTGACAGGGAGGGGATGCTGCGGCTGCTGCTTGTCGGGCTAAGCTGCGCCAACCCCAACTGCGAGGAGCGGCCGGCGATGCGGCGGGTGGTGCAGATACTGAACCGCGAGGCCGACCCGGTGCCCGTGCCGCGGAAGAAGCCGCTCCTCGTGTTCAGCTCCAGCGCGTCCATCAAGCTGCAGGAGATGGCCTTCTCCTGTGGCGACGACGTCAGAGGAGGCTACCCGGCCGCCGCCACCACCACCGCTAACCCGGCGTCCCCGAGATCGGAGGGAGCCGGCATAGAAAGGTGA
>HvleckRLK65
ATGGGCTCCCGCCGTCTTCCTACTCCTACCACCTTAGTCCTGCTGCTGCTGCTACACCTCTACTACGCGCCGCGCTGGGCCTTCTCGCTCTCCTTCAGCCTCAACTTCTCCGACCCCAGTGCCGGCTCATGGGTCGACCTGGACGGCGACGCATCCATCACTCCGCCGAGGCTCGAGCTGACGGGAAACGTCCAGAGCAGCGTCGGCCGGGCGTCGTACCGACACAAAGTGCCGCTGTGGAACAGCGACACGGGCGAGATGGCTAGCTTCACCACCAACTTCTCCTTCCGAATCACGCCGGAGAAGACCGGCGTGACAGGCGACGGGATGGCCTTCTTCCTCGGGCATTTCCCTTCGGAGATCCCGCCTACCAGCAAAGGCGGCGGCCTCGGCCTCCTCCCGGCCTTCACCGACGGGACGGGCAGCACCCGGATCGTGGCCGTGGAATTCGACACTCTCCGCAACTCGCACTATGCCGACATCAACGGCAACCATGTCGGCATCGACGTCAGCTCCGTCACCTCCGTGGCGTCCACGGACACGACGACCAGGCCGGGCAAGAACCTCACGTCCTCCTACGTTATGGAGGCCACTGTGAGGTACTATAACGTGTCCAGGATGTTGGCCGTTGATCTCCTCATCGACGATGCCTTGTACAAGGTCAATGCAACCGTCGATCTGAGCAGATGCTTACCGGAGGAGGTTGCTGTCGGCTTCTCCGCGGCCACCGGCGACTTCTCCGAGCAGCACCAGATACTGTCATGGTCGTTCAGTTCCACTCTACCTCCTCTTCCGAAGAGGAAGAACCGCAAAAAGTTAGTGATGATCCTACTATCCGTACTAGTCCCGTTGCTCCTTTTATTATTAGTGTGTTCGGCCGTGGTGCTATGGCGGCGACACAAGAAAATGGGACAAAATATGGACAGCCAAGAACGGTGTGCCAACAGAACCGACCTCGAGAGAGGTGTGGCCGCCGGCGGTCCCAGACGGTACACCTACAACGAGCTGGCTGCCGCAACCAGACACTTCGCGGAGGAGGAGAAGCTCGGGCGAGGCGGCTTCGGTAGCGTTTACCGGGGCCACCTTACGCTCACATCCGCAGCCGCCGACCATCGTGCGGTGGCGGTAAAAATGTTGTCGGCGGAGTCATCGGCGCAGGGGAGGAAGGAGTTCGAGGCCGAGGTGAGGATCATCAGCAGGCTGAAGCATCGGAACCTTGTGCAACTGCTGGGTTGGTGCGACAGCCGCAAGGGGCTCCTGCTCGTCTACGAGCTGGTCAGAGAGGGCAGCCTAGACAGGCACCTCTACAGCAAGGACGGCAGGCATCTGACATGGCAACAGAGGTACAAGATAATCCTCGGCTTGGGGTCAGCGCTGCACTACCTCCATGGAGAGTGGGAGCAGTGCATCGTGCATGGCGACATTAAGCCCAGCAACATCATGCTGGACTCGTCGATGAGCACCAAGCTCGGGGACTTCGGGTTAGCCCGGCTAGTGGACCACGACACGGGGTTGCTGCAGACCACCAAGGCCGTGCTCGGCACCGTCGGCTACATCGACCCGGAGTTCGTCAACACGCGCCGGCCGTGCACCGAGTCGGACGTGTACAGCTTCGGTGTCGTCCTCCTGGAGATCGTCTCCGGCCGGCGGCCGGTGGTGGAGACCGCGGGGAAATCCTTCACACTGCTCAGGTGGGTGTGGAGCCTGTATGGAAGGAATGTGATCCTCGACGCGGCGGACGAACGGCTGAGGGGTGATGAGGCCGAAGAGCGGTGGATGGTGAGGGTGCTTGTCGTCGGGCTCTGGTGCGCGCACCCGGACCGGAGCGAGCGGCCGTCTGTCGCCCAGGCCATGCATGTCCTGCAGTCCGACGAGGTGAGGCTGCCGGTGCTCGCGCTACAGATGTACAGGACTATGCAATACCCCAGGTCGTCCTCCGGCCCGTATGAGGCCTTCTCCATTGACAGCTCCACCTCTAGTTCCGGTTGTGTGCGTTCTTCCTTCGTCAGCACTGGCGACGACAGTCTTTCTTCTGGATCGTCCTCAACTGCATTGCTACGTCATTCCAAGGATCTAGCTAACTGA
>HvleckRLK66
ATGAAGTTCTTCCTCCTCTGTTTCCTCCTCTGCTTTGGCCTCGAGCTTGCGTTTTTCACTGCAGCAAGTGATGACCAACTCTTGTACCATGGCTTCACAGCCGGTACTAACCTCACCATCGACGAGGCTGCTTCAGTCACGTCGAACGGACTCCTTGAGCTAACCAATGGCTCACTTGGTTGCAAAGGCCATGCGTTCTACCCAACTCCGTTGCACTTCCGCAAATCGCATGATGATGCCGTGCAGTCTTTCTCAGTCGCCTTTGTGTTTGCCATCCACTCCAGCTACCCCATCATGAGCCGACAAGGCTTGGCTTTCGTCGTCGCCCCAAGCATGAACTTCTCAAGTGCATTGGCGAATCAATACTTGGGCCTCATGAACTCCCAGAACAACGGCAACTTGAGCAACCACATCTTCGCCATCGAGCTAGACACCGTCCTAAATATCGAGTTCAAAGACAATAACACCAACCATGTAGGTATCGACATCAACAGCCTCCAGTCTATAGAGTCCTACCCTGCAGGATACTATGATGATAGGAACGGTACCTTCCAAGACATGGTCCTAGCTAGCGGTGATGCAATGCAAGTGTGGGTGGACTACAATGGTGACGCCAAGAAAATCAGCGTGACCATGGCTCCCCTTCAAATGGAGAAACCTACAAGGCCACTCATCTCGGCAGATTATGACCTCTCAAGTGTGTTGCAGGATCCATCCTACATCGGCTTCTCATCTTCAGGTGGAGAGGTCGACTCACGACATTATGTGCTTGGTTGGAGTTTTGGGATGAACAAACCAGCCCCACTGATCAATATTGCAAAGCTGCCAAAGCTACCTCGTCCAAAGCATCAATCAAAGCTGCTGAAAATCATCCTACCTATAGCGAGCGCAATTTTCGTATTTGCTGTAGGTTCTATGGTCATTTTACTTGTGAGGAGAAAGTTGAGGTATGCTGAGCTAAAAGAAGATTGGGAGATCGAGTTCGGGCCACATCGGTTCTCATACAAGGATTTGTACCATGCCACAGAAGGATTTAAGAACAAACACCTACTTGGTGCAGGAGGGTTTGGGAAGGTATATAAAGGGACCCTTCCATCAACTAAACTAGAGGTTGCTGTGAAGAGGGTATCCCATGACTCCAGACAGGGTCTAAAGGAATTTGTTGCTGAGGTTGTCAGTATTGGCCGCATCCGACATCGTAACCTTGTTCAGTTGCTTGGCTATTGTAGGAGAAAAGATGAACTCCTTTTGGTGTACGACTGCATGTCGAATGGTAGCCTTGATAAGTATTTGTATTGTGATGATCAAATGCTTATACTAAACTGGGCTCAGAGGTTTCGGATAATAAAGGATATTGCATCAGGCTTGCTCTACCTCCATGAGAAATGGGAGAAAGTGGTCATCCACCGTGACATCAAAGCAAGCAACGTACTCCTCGATAGTGAAATGAATGGGAGACTAGGGGACTTTGGCCTTGCAAGACTTTATGATCATGGAGCTGATATGCAGACCACACATGTGGTTGGTACCATTGGGTACCTAGCCCCAGAACTGATATGCACAGGTAAGGCAACTCCTCTCACCGATGTGTTTGCCTTTGGGATTTTCCTTCTTGAGGTTGTCTGTGGGCAAAGGCCAGTTAACATCAATGCACGAGGAAATCAACCTTTGTTAGTTGATTGGGTTCTTGAGCATTGGAATAAGGGATCACTGACTGAGGCAGTAGATACGAGGCTACAGAATGACTATAATGTTGACGAGGCATGCCTAGTGCTAAAGCTAGGACTACTATGTGCACACCCATTTACCAATGCAAGGCCCAACATGCAGAGTATCATGCGGTACCTTGAT
>HvleckRLK67
ATGGTGTTGGTTTCGGCCTCAGCTGCTCACGCGCGCGCTCCCCCCACCACTCTGACTCCGCCACCCGCGGCCACCGCACCGCTCTCCTCCTCCACCCTACCGTTGCCTCGCCACAACGCCACGGCCACCCAGGTCGCGCGCACGTGTCCCCGCCTCATCTCCCACCTCACCTACTCTCTCCCGGTCGGCCTCAGCTCAGCTCACTCCCCCCCGCGCTCCAGCCCATGTAAATGTCTCGCAATCCCCACGCCACCTCCAATGCCGCCCGCAATGGCCACGCTCACCACGACCGCCCCTCCTCCGCCCCTCATCCTGCTCACCACCCTCCTCCTCCTCCTCCTCGCTGACGCCGCCGCGGTGCGTTTCGACTACGCGACCCTCACCCTCGCCACGCTCGAGCTGCTCGGCGACGCGCACCTCAACAACAACACCATCCGCCTCACGCGGGACCTGCCGGTGCCCACCTCGGCATCGGGCCGCGCGCTCTACGCGGCCCCCGTGCGCCTCCTCGCGGGATTCTCCACCAGCTTCGCATTCACCGTCACCACGCTCAACCGGGGCTCCGTCGGCGGCGGGCTGGCCTTCGTCGTCGCCCCCGACGCCGCCTCCGTCGGCGACGCCGGGGCGTTCATCGGGCTCGACCCCGCCGCCGACGTCGCCGTCGAGTTCGACACGCTCATGGACCTCGAGTTCGGCGACGTCAACGGGAACCACGTCGGCGTCGATCTCGGCAGCATGGTCTCCGCCGCCGCCGCCGATCTGGGCTTGGCCGGGGTCGAGCTCACCAGCGGGCGGACCGTGTACGCCTGGATTGAATACTCGCCGGGGAAGGCCATGGATGTCTTCGTGTCCTACTCGGCCAAGCGGCCCGCGGCGCCGGTTCTGTCCACGCCCGTCGATCTGGCGGGCTATGTCAAGGAGCAGGCTTTCGTCGGGTTCTCCGCGTCCACGCAGGGGAGCACGGAGATCCACGCCATCGAGTGGTGGAGCTTCTCTACCCCGTCGCCGCCTTCCCCGGCGCCGTCCAAGCCGCCGCCGGTAGCGCCCCCTCCGGCGAGCCCCATCAACCCGACGCTTCCATCCACTCCGCAGCTCCCGGGCATCACGCCGCCGGCGACACCAGCGACGGTTTCGGCACCGCCGACCAGCTCAGTTACTGCCGCGAGCGCCCCGGCCAATTCGGTTTTTCGGAAGAATGCCAAGACGCCGCACCCG
>HvleckRLK68
ATGCGGCTCAAGCCTGTATCCGTCGTCTCCTTCCTCGTGTTGCTCCTCTTCCACTTCCTCGCGCGCGGTGACGGGCAGTTCATCTACAACGGCTTCGCTGGTGCGCAGCTCGACCTCGACGGCATGGCCGTGGTCGAGCCTGACGGCAAACTCGCGCTCACCAACATCACGTCCCAGCTCAAAGGCAGCGCCTTCCACCCGACGCCCCTCCGCTTCCACGAGCCGGCAACCAACGGCACCGTCGCACGGTCCTTCTCGGCCACCTTTGTGTTCGCCATTGTCACTGACTTGGTCACGGTGGGCGGGAACGGCCTCGCCTTCTTCCTCGCGCCGACCAAGAACCTGTCCATGGCGTCGCCGAGCCAGTTCCTCGGCCTCTTCAACCCCGAGAACAACGGCAACGCGAGCAACCACGTCTTCGCCGTGGAGCTTGACACCATCCTCAACCCGGAGTTTCGGGACATCAACAGTAACCACGTCGGCGTCGACGTGAACGGCCTGGCATCGGTCGTGGCCGAACCTGCAGGCTACTACGACGACGGCACCGGCGATTTCAAGAACCTGACTCTCATCGGCGGCGATGCCATGCAAGTGTGGGTGGACTACGACGGCCGATCGAAGGTGCTCAACGTGACCCTCGCGCCCGTCGAGGCGCCCAGGCCCAAAAAGCCCCTCATCTCCATCACCATCGACCTCTCGCCGGTGCTGAACGGCACGGCGTATGTCGGCCTCTCGTCGTCGACGGGGCCGTTCCGCACGCGCCACTACGTGCTGGGCTGGAGCTTCGCGCTGGACGGGGCAGCGCCGCTGCTCGACTACTCAAACCTCCCCAAGCCGGCCCGCATCGGCGACAGCAAGCGAAGGTCCAAGGCGCGCGACGTCATCCTTCCGGTGGCCACTCCGATCCTCGCGCTCGTGGTGGTCGCCGGCGTCTCCCTGCTCGTGTGGCGGCGGTTACGGTACGCGGAGCTGAGGGAGGAGTGGGAGGTGGAGTTCGGACCGCATCGGTTCGCGTACAAGGATCTCTACCGCGCCACCGGCGGTTTCGACGGCGAGCAACTTCTCGGTGTGGGCGGGTTCGGGAGGGTGTACAAGGGCGTGCTCCGGGTGTCCAAGAAGGAAGTGGCCGTGAAGATCCTCATGTCGCACGACGGCGCGAAGCAGGGGATGAAGCAGTTCGTAGCCGAGGTTGTCAGCCTCGGCCGCCTCCGGCACCGCAACATCGTGCAGCTGCTCGGCTACTGCCGGCGCAAAGGAGAGCTTCTCCTGGTTTACGAATACATGCCCAACGGCAGCCTGGACAATTGGCTGTACGACCGGAACGCGCCGCCGCTGAGCTGGGCGCAGAGGCTCAGCGCCATTAGAGGCGTTGCGTCCGGCTTGCTCTACCTCCACGAGGATTGGGAGAAAGTGGTGGTGCACCGGGACATCAAGGCGAGCAACGTGCTCCTGGACGGCGACATGAACGCGCGGCTCGGCGACTTCGGCCTGGCCAAGCTGTACGACCGAGGCACCGATCCGCAGACTACGAGCGTGGTGGGCACCATGGGTTACCTCGCGCCGGAGCTGGCGTGCACGCGGCGGGTAACGCCGGCCACGGACGTGTTTGCGTTCGGTTCGTTCGTGCTGGAGGTGGCCTGCGGCCGGCGACCCATCGAGCACGGCACGGTCGACGACAACCGGCTGGTGCTCGCGGACTGGGTGCTCGAGCGCTGGCACAACGGAGACGTCACGGACACGGCGGACCCGCGGCTCTGCGGCACCTACGATGTCGAGGAGGCCGCGGCGGTGCTCAGGCTGGGCCTGGTGTGCTCCCACCCGACGCCCGCCGCGAGGCCGTCGATACGGCAGGTGGTGCAGTACCTCGACGGCGACATGCCGATGCCCGAGCCAGCGCCGACGTATCGGAGCTTCACCGCGAGGGCCTCGATGCACAACGCCGAGGGCAACGAGTCCTACGTTGCTTCATACCCGTTGTCTTCGGCGACTAGCGTCGGCGCATCCTCTGTCCTCTCCGGGAGGTGA
>HvleckRLK69
ATGCTTCCCAGGAAGTTGTTGTTGTTGCTGCTTGTGGCAGTGGGTGTCGAGGCCGGCGTCGAGTTCGCCTACGAGGGCTTCCCCGGCGCTGGGCTGGCGCTCGATGGCATAGCAAGCGTCACGCCGGACGGGCTGCTGCTGCTCACCAACGACACCGACTTGAACGTAGCCCACGCCTTCCACCCGGCCCCGGTCAGGTTCCACCGGACGTCCTCCTTCTCGACCACTTTCGTGTTTGCCATCGTGTCGGAGCTCGTCGACCTGAGCACCAGCGGGTTCGCGTTCCTGGTCGCGCCGAGCAGCAGGGACCTGTCTTCGACGATGGCGGCGCAGTACCTGGGACTGTTCAACGCCAGCGACAACGGCGACCCGAGGAACCGCGTCTTGGCCGTCGAGCTGGACACCGTGCGCAACCCGGAGTTCGCGGACATGAACGACAACCACGTCGGCGTCGACGTCAACAGCCTCAACTCCTCGGCGGCTGCCATGGCAGGCTACTACGACGACGCCACCGGCGCATTCCGGAACCTTAGCCTGGCAAGCCGGGAGCCCATGCAGGTGTGGGTGGACTACGACGCTGCCGCGACGGAGATCACCGTGGCCTTGGCTCCGGCGCGGTCTCCCCGGCCCAGGAGGCCGCTCCTGACCACAAGGATAGACCTCTCAACGGTCGTCGCCGACACGGCGTACGTCGGCTTCTCGTCGGGGTCCAGCATCGTGCTGTGCAAGCACTACGTGCTCGGCTGGAGCTTCAGCCTGGACGGCGCAGCTCCAGCGCTCGACCACGCCAAGCTGCCGACCCTACCCCGCATTGGCCCCAAGCCCCAGTCGAAGACGCTCGCCATCGCGCTGCCGATCGTCACCACGGCGGCCGTCCTCGCGGCGGTCGGCGTCGGCCTCTTGTTGCTCCGCCGGCGGCTCAGGTACGCGGAGCTGCGCGAAGATTGGGAGGTGGAGTTCGGGCCGCAGCGGTTCGCGTTAAAGGACCTGTACGACGCCACCGCCGGGTTCAAGGACAAGCGGCTGCTCGGCGCCGGAGGGTTCGGGAGCGTGTACAGGGGCGTGCTCCCGGGGTCACGGGCCGAGGTGGCCGTGAAGAGGGTGTCACACGAGTCGAGGCAGGGGATGAGGGAGTTCATCGCGGAGGTGGTAAGCATCGGCCGGCTCCGGCACCGCAACCTCGTACAGCTGCTCGGCTACTGCCGGCGCAGAGGGGAGCTGTTACTGGTATACGATTACATGCCAAATAGCAGCCTCGACAAACACCTGCACGGGCAAGGGCAAGGGCACGGCCACGCTCTGGGCTGGGCGCAGAGGCTCCGGATCATCAGAGGCGTCGCATCAGGGCTGGTGTACATGCACGAGGACTGGGAGCAGGTCGTCATCCACCGGGACATCAAGGCCAGCAACGTGCTCCTGGACGGCGAGATGAACGGGCGGCTCGGCGACTTCGGCCTCGCGAGATTGTACGATCATGGCGCGGACCCGCAGACCACGCATGTGGTGGGCACCATGGGGTACCTAGCGCCGGAGCTGGTGCGCACCGGCAAGGCGACGACCCTCTCCGACGTGTTCGCCTTCGGGGCGTTCCTCCTGGAGGTCGCCTGCGGTAGGAGGCCCATCGAGATCGAGGAGGGGAAGGAGGACGTCGACGGCTTCGTGCTGGCGGACTGGGTACTGGGGCACTGGCGGAATGGCGCCATTACCCGCGCGGTGGACGCGAAGCTAGGCACAGGGTATGACGCCGGAGAGGCGGACACCGTGCTGCGGCTGGGGCTGACGTGCCTGCACCCGTCGCCCGCGGCGCGCCCGAGCATGAAACAGGTGACGCAGTACCTCGACGGCAGCGCGCCGTTGCCAGAGCTTCCCCCGACGTACGTGACGGTCAACATGCTTGCCGCCATGGAGGCGCACCAGGGCGTCCTTGGCACGTGGGCGGTCTGGCGGTCGGCGTCGAGCGTCGCCACCATGTCTGACATTGGCCTCTCCGGCCGATGA
>HvleckRLK70
ATGCCGCCGCCCTGCCCATCCACCGCCTTCTTCCTCCTCCCCCTCCTCCTCGCCGTCCACCTCCCGCCCGCCGCGGCCGCCGACAGCCGCCACGCGTCCACCACCGCCGCCCCCTCCTACCGCCGCATCTCGTGGGCGAGCAACCTCACGCTCCTGGGCTCCGCCTCGGTCCTCCCGGGCGCGGTCGCCGTCGCGCTCACCACCAACTCCAGCGACGGCATCGGCGCCGGCCGCGCCCTCTTCTCGGAGCCCGTGCGCCTCCTCCTCCCGCAGCCCGACCCGCGCGCCGCCCCGGTGCAGGCCTCCTTCTCCACCCGCTTCACCTTCCGCATCACCCCGTCGCCCTCCTACGGCGACGGGATCGCGTTCGTCCTCACCTCCTCGCGCACCTTCCTCGGGGCCTCCAACGGCTTCCTCGGCCTCTTCCCCTCCGCCTCCGCCTCCGACGACGGCGAGCTCGCCGGCGTCTACACCGTCGCCGTCGAGCTCGACACGCACCGCGATGTGGCGCTGCGCGACCCTGATGGCAACCACGTCGCGCTCGACGCGGGCTCCATCTTCTCCGTCGCCTCCGCGAGCCCAGGCGTCGACCTCAAGGCCGGCGTGCCCATCACCGCCTGGATCGAGTACCGCGCGCCGCGCCGCCGCCTCCGCGCTTGGCTCTCCTACTCGTCGTCCCGCCGACCCGACAAGGTCGCGCTCTCGGTCGACGTCGACCTCTCCGGCCTCCTCCTCACGTACATGTACGCCGGCTTCTCGGCGTCCAATGGCGAAGGGACCGCGGTTCACGTCGTCGAGAGCTGGACCTTTCGCACCTTCGGCTTCCCCAACACCACGCACGCCTCGGCTTCCCCGATTCCTTCGCCACCGCCCAATCCCAAGGACCAGGCGTCGCTCAAGAGCCCACTGCCGCTTCCAAAAAACAACCACCACCACCATAACCTATTCTACACGGTGCTGGGCGGAGCCCTCGGTGGCGTGGTCTTGCTGGTTCTTGTGGTCAGCAGCTCTATTCTATGGATTCGCCATTCAAAGCGCCGCACAGGTGAAAAAACTGCTGTGCTGTTCGACGACAAGAACTTCCGTGGGATGCTGTCCATGGAGGTGGTACGCGCAGCAACAAAGGATTTCGGCAGTGAAAATGTGATCGGCATTGGTGGCTCTGGCGCGATTGTGTTTGAGGGGGTTCTCCCTTCTGGGTCAAGGGTTGCTGTCAAACGGTTCCAAGCTATGTTACCGTGCTCAAAGGCGTTTTTGAGTGAGCTTCGTGCCATGCTTGATTGCCCACACCACCCCAATCTTGTGCCACTCCTTGGATGGTGCTCCAGTGAGCATGACCTGGTTCTTGTTTACGAGTTCATGCCCAATGGTAATCTTGACAGTGCACTACACACAAAGGGTGGAGCAACACTTCCCTGGGAGGCACGGTTTAGGGCGGTGCTTGGCGTTGCATCCGCACTTACATTTCTGCATGATGAATGTGAGCACCGCATTCTTCATCGTGATGTCAAGTCATCAAATGTGCTGCTCGATGGAGACTTCAATGCTCGGTTAGGAGATTTTGGTCTTGCTCGTGTGGTGAGCCATGGCGGGGTGCCCTTGGCAACACAGCCAGCGGGCACACTGGGATACCTCGCACCTGAGTATGTGCATTCAGGTGTGGCATCAGAGCGGTCGGATGTTTACAGCTTCGGAGTGGTTGCTTTGGAGGTGGCCACTGGCCGGAGACCAACGGAGAAGGGAACCGCAGTTGTTGACTGGGTGTGGAGTCTCTGGGGTCGTCGTAGGCTGGTTGATGCAGCAGACCAGCGGCTTCAGGGACGATTTGTCGCGGAGGAGATGCGGCGGGTGCTGCTTGTGGGCCTCTGCTGTGTGCATCCGGACTGTAGGAAGCGGCCTGGTATGCGAAGGGTAGTCAGGATGCTTGATGGTAGTGCACCCATGACACTGGTTCCAGATAAGAAGCCACCAGTTGTACTGAAGTCACCACTAAATCAAACATCGTCAGTGAACACCATGGATACTATCAATACTGCATTTTACAGCTGTCGCTAG
>HvleckRLK71
ATGCTGCCTCGCTACCTATTACTCTGCCTCATCTTCCTCATCCCAGCCTCCGCCTCCTACACCAACGACGGCTTCACCTACGATGGTTTCTCTAGTGGCATGCTCCGGTTTGATGGTGTAGCTTCAATCTCAAGCAGAGCTCTCATGCTAACCGATGGTGTTGCCCAGAGTGTAGGACGCGCTTTCTTCGGAGGCCGGTTTGACTCTATTTCCTCATTCTCAACAACCTTCGTGTTCGTCATCAGTCCTCCTTACTCTGATTTAGGCGGGCATGGGCTTGCCTTTACGGTTTCTGCCACGACGGACTCTTTATTGGGCGCCTCCCCGTCTCAGTACATGGGCATCTTCAACCCTGAAAACAACGGCAATGTGACAAATCAACTCTTTGCCGTCGAGCTTGATACCATCCAAAATCCCGAATTCAGGGATATTAATAGTAACCATGTTGGAATCGATGTAAACACCTTGGTGTCTATCAATTCCCATCCTGCTGGATACTATACCCCAGATGGCAATTTCACTGATTTGCTACTTATTAGTGGAAAACCGATGCAAGTATGGGTGGATTATGATGACAGTTCACACCAAGTGAATGTCAGTTTAGCACCTTACCTAGAGCAGAAGCCTCAGCGCCCACTGCTATCCAATACTATCAATCTTACATCGGTTTTGCCAAGATCAGTATATGTTGGCTTTGCCTCTGCAACCAGCACCGTAAGATCCATACACCGCATTATCGGCTGGAGTTTCAATCCAAATGGGGAGGCTAAACCACTTAACTACTCAGTGTTGTCTGAAATTATACAAGATGTTCGACGCGATGCTCAAAGTCGCTCCCATGTCCCTAAGGGTGTTCTTATACCAGTTATTATTGTGTCGGTGTTCATCACAACTGTTGTTATTGTCGCTATTTATGTTTATATGAAGAAAGCAAGGCAAAGTGGTGATTGGGAAATTGATTGTGGGTCAGCATCCTTCACATATAAAGATCTTGCTGCTGCAACTAACAGTTTCAGTGACAAGATGCTTCTTGGGAAAGGAGGATTTGGGAAAGTGTACAAAGGGCTGCTGCAAACCTCGAAGCAAAATGTTGCCATCAAGCGGGTTTCACCAGAGTCAAAGCAGGGGATGAAGGAATTCATAGCTGAGATAACCATCCTAGGCCATCTCCACCATCGCAACCTTGTGCAATTGCTCGGTTATTGTCGCAACAAGAGCGAGCTCCTTCTGGTTTACGATTACATGCCAAATGGTAGTCTGGACAGAGTTTTGCATGGTCGAGATAAGCAGACTGTAGGCTGGGTTCACAGATTCAACATTATAAAAGGCATTGCAGCTGGTCTTTGCTACCTCCACGAGGATTGGGAGAAGGTAGTCATCCATCGAGACATCAAAGCAAGCAACGTGCTCCTCGACAATGAAATGAACGGTAGATTGGGTGATTTTGGTCTGGCAAGATTACACAACCATGGTACAGATGCCCACACCACACATTTGGCTGGCACCTGGGGGTACATTGCTCCGGAGCTGTCTAGGCTAGGAAGGGCAACCAAGGCAACTGACGTCTTTGCATTCGGTGTCTTCATGTTGGAGGTTGTTTGTGGGAGGCGTCCAATACAAGTGAATGATTCTGATGGTGAGCCAGTGCTGCTGACAGACTGGGTGGTTGATGCATGGGAGAGTGGTTCAATCCTCAATACGGTAGACCCGAAATTAGAAGATTATCTCAGTGAGGAAGCAGAGTTAGTACTAAAGCTTGGCTTGCTCTGCTCACACTCAGCACAAAGTGCTAGGCCATGCATGCGCCTAGTTATGCAATACCTTTCAAAGGATGTGCTACTCCCTGATTACCAGCCAAGTTTTTTGAGCCTTACTAGCAGGGATGAAGAATTTGGGCAGCATATCCTGTCATGCCCATCTGTGGCGGCGACCATGACAGGACTTTCTGGAGGAAGATGA
>HvleckRLK72
ATGTTTCTCAAGCCTTCCCACATGGTCGCTCCGCTGGTCCTGCTCCTCATGGCCGCCGGTCACTGCTGCCTCGAGGCCACCGGCGGCTATGATGGTTGGCAGTTCGTCCTCAACGGCTTCGCCGGCGCGAACCTGACGCTCGGTGGCACGAGCATGGTCCTGCCGAACGGCCTCCTCATGCTGACCAACGGTGCCACCAGGAAGATGAAAGGCCATGCCTTCCACCCGTCCCCGCTGCCGTTCGGCTCCGGGTCCAACGGCGCCGGCCCCCTGCGGTCCTTCTCGACCACCTTCGTCTTGGCCATCTTCGGCCACGGCCGGCACGCCGACCTTAGCGTCCGCGGCCTGTCCTTTCTCATCTCTGCGTCCTGGGAGGTGCTCTCCACTGCGTTGTCCGGTCAGCCCTTGGGCCTCAGCAACGGCAACCAGAACGCCAGCATCTTTGCCATGGAGTTCGACACGCTCTATAATGCCCAGTTCAGTGACACGAAGAACAAGTACGTCGGCGTCGACGGTGATAGCCTGGTGTCCCTCAATTCCGCCAACATCGGGAACTACGATGACGGCACCGGGCGGTTGCTAAACCTATCTGTGATAAGCTGGAAAGCCATCCAAGTGTGGGTGGACTACGACAGCAAGGCAACGGTGATCACTATGACCATGGCTCCCCTGGGCGTGGTCAGGCCCAAGCAGCCTATGCTGCAGACCACCATCGACCTCTCTGGTGTGGTGCAGAGCACGGCGTACGTCGGATTCTCGTCGGCGATGTGCAATATCACCTCCGGACACTTCATCCTCGGCTGGAGCTTCGCGCTGCACGGCCCGGCCCCGATACTGGACATCTCGGTGATGCCGGCCTTGCCATCGGCATGGACCAACAACAACCAATCCATCCCGCCACCGTCCATGTCCATGTCACTGAAGCTCATGCTGGCCTTAGCATCGGTGACACTGGTTTCGGTTGGCATCGGAATCTACGTCTCTGCAAGACGGCGTATCAATTTCTCCAAGGTGCAAGAGGACTGGGAGGTTTCGTTAGGCCCCAACCGATTCTCTTACAAAGACTTGTTTCATGCGACAGAGGGGTTCAGTGAGAAGAACCTACTTGGGAGGGGAGGTTTCGGAAGTGTCTATAAGGGCGTGCTTGGCAAGCCTGACATGGAGGTCGCAGTTAAGAGAATGTCACATAATTCAAGGCAAGGGGTTAAGGAGTTCATCGCCGAGGTGGTGAGCATTGGTCGTCTTCGACATCGAAATATCACACGATTGTTGGGCTACTGCAGGCGTAAGGGTGAACTTCTCCTGGTTTATGACTACATGGAAAATGGTAGTCTTGACAAGTACCTACACACAAGAAATGGCCCAACTCTATGTTGGTCCCAGAGGTATTCAATCATCAAAGGTGTGGCTTCAAGCTTATTGTATCTACATGAGGAATGGGAGCAGGTCATCATCCACCGAGATATAAAGGCAAGTAATGTACTCTTGGACAACAAGATGAATGGACGGTTGGGTGATTTTGGTCTTGCAAGGATATATGACCACGAAACTGCCGCTGAAACCACCCATGTGGCTGGCACCATGGGATATCTTGCGCCAGAACTCTCGCGCACCGGGAGGCCAACACCATTCTCTGATGTATATGCATTTGGCGTGTTTCTCCTAGAGGTCACATGTGGACGAAGGCCGATCTTCATTGATGAGCAAAACAACCGGGTATTGTTGGTTGAGAGGGTGCTTCAGCACCACCTCAACAACTCAATGCTCGACACGGTGGATCCACGACTCGGAGTGGAATTCAACATGGAGGAAGTCACCATGGTGCTCAAATTGGGTTTGCTATGCACTTACCCGTTGCCCAACGCGCGGCCTATCATGCGGAAGGTCATGCAATACCTCGACCATGATCAATCGCCTCCCGATTTATCACCGGCCTACATAAGCTACCTCATGATGGTACAAATGCAAAATGAAGGGTTTGATTCAGACAACATGCCACGTTCTCGACCCACAGCGAGTGTTGCCACATTATCAGGAGAGTCTTCGGCGACAATTTTGCGAGAGGGAAGATGA
>HvleckRLK73
ATGCTTCTTCTCGGGCCTTACCACTTGGTCGCCCTGCTCCTGCTCCTCGTCGCTGCGGGCCGCTGCCTCGCGGCCACCGGCCGCGGCGATGATGGCCGGCGGTTCGTCTACAACGGCTTCATCGGCGTGGACTTGACGCTCGACGGTGCGGCCCAGGTCATGCCGAACGGTCTCCTCATGCTGACCAACGGAAGCCTTGGAGTGACAGGCCATGCCTTCCACCCGTTCCTGCTGCCGTTCCGCAACGCCACCGGCGCCATGCGGTCCTTCTCGACCATCTTCGCGTTCGCCATCTTCGGTCAGTACGACGACCTGAGCAGCGACGGCATGGCCTTCTTCGTCTCCGCATCCAAGGAGACGCTTTCCGGTGCGCAGTCAGGCCGGTACTTGGGCCTCCTCAACCAAACCAGTAATGGCAACCAGAGCACCCGCATCTTCGCCGTGGAGCTAGACACGTCAAAGGACGCCGAGTTCCTAGACATCAACAACAACCACGTTGGTGTCGACGTCGATAGCCTGTGGTCGCTCCATGCCACCCCCTCCGGGTACAACGATGATGGCACCGGTTTGTTTCAGAATCTAAGCCTGATAAACCGGAAGTCCATACAGGTGTGGGTTGACTACGACGCCACGGCCAAGGAGATCACCGTGACCATAGCTCCACTGGGGGTGGCCAGGCCCAAGAAGCCCCTGCTGCAGACCATCATCGACCTCTCCGATGTGGTGCAGAGCACGGCGTACGTTGGGTTCTCGTCCGCAAGTGGAAGTATTGTCACTGCAAAACACTTCGTCCTCGGCTGGAGCTTCGCTCTGGACGAGCCTGCCCCTGCACTCAACATCTCGATTCTGCCGGCCCTTCCACCGGCCAGCCCCGTGCGGTACCCCTACAGCACCAGGTTAGCGATATTACCCAGCGGGATTACTCTGCTGGTCTTAGCAGTAATGCTGGCTTTGGCTATAGGCATCGGAATCTACATATGCGTAAGACAGAAGCGTCTCAAGTACTCTGAGGTGCGTGAGGACTGGGAGGTCCCGTTTGGCTCCAACCGATTTTCATACAAGGACTTGTTTCATGCGACCAAGGGTTTCAGTGACAAGAACTTGCTTGGGCGGGGAGGCTTCGGAACCGTCTACAAGGGTGTGCTTCGAGAGCCGGAGATGGAGGTTGCCGTGAAGAGGATGTCACACGATTCAAGGCAAGGGGTAAAGGAGTTCATCGCCGAGGTGGTGAGCGTTGGTCGTCTACGTCACCGTAACCTCGTGCAATTGTTGGGCTACTGCAGGCGGAAAGATGAACTTCTCCTGGTTTATGAGTACATGAAAAATGGTAGCCTTGACAAATACCTACATGGTAGAAATGACCAAGTCCTATGTTGGTCTCAGAGGTATTCAATCATCAAAGGTGTGGCATCAAGTTTGTTGTATCTACATGAGGACTGGGAGCAGGTCGTCATCCACAGAGATATAAAGGCAAGCAATGTGCTCCTGGATAGTAAGATGAATGGAAGGTTGGGCGATTTTGGTCTTGCAAGAATCTATGACCACGAAAACGCTGCTGAAACCACCCATGTGGCTGGTACCATGGGATATCTTGCGCCAGAACTCTCGCGCGCTGGGAGGCCAACACCCTTCTCCGATGTTTACGCATTTGGTGTGTTTCTCCTAGAGGTCACATGTGGACGCAAGCCAATCTTCATTGATGATCAAAGCAATCGGGTGTTGCTGGTCGAGTGGGTGCTTGAGCACCACCACAATGGCTCAATGCTCGACACGGTGGATCCACGACTCGGAGGGGAATTCAACACAGAGGAGGTAACCATTGTGCTCAAATTGGGTTTGCTATGCACGTACCCGTCGCCCAACGCACGGCCTATCATGCGAAAGGTAATGCAGTACCTCGACCGTGATCAATTGCCTCCTGATTTATCACCGGCCTACATAAGCTACATCATGATGGCACAAATGCAAAATGAGAGGTTTGATTCGCACGACATGGCATGTTCTCAGCCCGCGATGAGTGTCGCCACTTTGTCGGGTGAGTCAGTGACAATTTTGCGAGAGGGAAGGTGA
>HvleckRLK74
TCCAACTCGCGACATGGTTCAAAGAATTTTGCTCGCTCCAACCCGGAAGCACTGGTAAAGGGGGAAAGCTCGCTTCATCGCCCTACTTACCGTTCACAAATCCCAAGCACCATAGCCAAGGACAAAGAGACCGGCGAGCGGTCCTTCTCCGCCGCTGGTGATACGAGAGCCATGCTTCTTCTCGGGCTTTACCACTTGGTCGCCCTGCTCCTGCTCCTCGTTGCTGCGGGCCGCTGCCTCGCGGCCACCGGCGGCGGCGATGATGGCCGGCAGTTCGTCTACAACGGCTTCTCCGGCGCGAACTTGACGCTCGACGGTGCGGCCGGGGTCATGCCTAACGGCCTCCTCATGCTGACCGATGGCAGAAAGGTGAAAGGCCATGCCGTCCAGCCGTTCCCGCTGCCGTTCCGTACCGCATCGAACGCCGCCGGCTCCATGCGGTCCTTCTCGACCACCTTCGTCTTCGCCATCTTCGGTCCATACGAAGACCTCAGCAGCGACGGCATCGCCTTCTTCGTGGCCGCGTCCAAGGAGGTGCTCTCCGCTGCGTCGCCAGGCCAGTTCCTGGGACTACTAAACGAAGACAATATTGGCAACCGGAGCGCCCGCATCTTTGCCGTGGAGCTAGACACGTTCAAAGATGCCGAGCTCCGCGACCTCAACGACAACCATGTCGGGGTCGACGTTGATAGCCTGGTGTCAATCGATTCCGCCGACGCCGGATGGTACTATGATGACGGCACCGGGATGTTCCAGAACCTAAGTCTGATAAGCCGGAAGCCCATGCAGGTGTGGGTGGACTACGACAGCAGGGCCACGGATATCACGGTGACCATGGCTCCGTTGGGCGTGGCCAGGCCCAAGAGGCCCCTCCTGCAGACCAACGTCAACCTCTCCGGTGTAGTGCCGAACATGGCGTACGTCGGGTTCTCTTCGGCAACGAACTTCTTTTCCACACGACACTTCATCCTCGGCTGGAGCTTTGCCCTGGATAGACCAGCCCCTGCACTAGACATCTCGAAGCTGCCACAGTTACCATCGGCCTGGAGCAACTCACGGTCCATGCCAATCTCAATAAAGATCGTTCTAGCCTTAGCATCGGTGACGATGGTTTCGCTGGGCATCGGAATCTACATCTTTGTAAGAAGGCTGCGTCTCAAGTACTCTGAGGTGCGTGAGGACTGGGAGGTCCCGTTTGGCTCCAACCGATTTTCATACAAGGACTTGTTTCATGCGACCAAGGGTTTCAGTGACAAGAACTTGCTTGGGAGGGGAGGCTTCGGAAGCGTCTACAAGGGTGTGCTTCGAGAGCCTGAGATGGAGGTTGCCGTCAAGAGAATGTCACACAATTCAAGGCAAGGGGTAAAGGAGTTCATCGCCGAGGTGGTGAGCGTTGGTCGTCTTCGACACCGTAACCTCACGCAATTGCTGGGCTACTGTAGGCGGAAAGATGAACTTCTCCTGGTTTATGACTTCATGGAAAATGTTAGCCTTGACAAATACCTACATGGTAGAAACGACCAATTGCTATGTTGGTACCAGAGGTATTCAATCATCAAAGGTGTGGCATCAAGTTTGTTATATCTACATGAGGAATGGGAGCAGGTCATCATCCACAGAGATATAAAGGCAAGCAATGTACTCTTGGATAGTAAGATGAATGGAAGGTTGGGCGATTTTGGTCTTGCAAGGATCTATGACCACGAAACCGCCGCTGAAACCACCCATGTGGCTGGCACCATGGGATATCTTGCGCCAGAACTCTCGCGCGCTGGGAGGCCAACACCCTTCTCTGATGTGTACGCATTTGGTGTGTTTCTCCTAGAGGTCACGTGTGGACGCAAGCCAATCTTCATTGATGAGCAAAACAACCGGGTGTTGCTGGTCGAGTGGGTGCTTGAGCACCACCACAACGGCTCAATGCTCGACACGGTGGATCCACGACTCAGAGGGGAATTCAACACAGAGGAGGTAACCATTGTGCTCAAATTGGGTTTGCTATGCACGTACCCGTCGCCCAACGCGCGGCCAATCATGCGAAAGGTCATGCAGTACCTCGACCATGATCAATTGCCTCCTGATTTATCACCGGCCTACATAAGCTACATCATGATGGCACAAATGCAAAATGGAGGATTTGATTCGCACGACATGGCATGTTCTCAGCCTGCGATGAGTGTCGCCACTTTGTCGGGTGAGTCTTCAGTGACAATTTTACGAGAGGGAAGGTGA
>HvleckRLK75
GTTTATCTCAGTCTGCTCAAAAGAAAACGAGAGAGCAAACTTTGGCGAGAAACCATGCCAGCTCTTCTTCTGCTCCTGTCATTGAGCCTGAACGTAGCGTTAGCCTCCTCGGCCGACGCCGGCCAGTTCACCTACCAGGGCTTCGCGACGGCGAATCTTACCCTAGATGGTCTCGCCGTCGTCATGCCCAACGGCCTCCTCGCTCTCACAAACTTCACTTCCCAGGAGAAAGGCCACGCCTTCCACCCAGCCCCACTCCGCTTCCTCAACGCGACGGCGAGCTCCACGGCCGTGGCGCGGTCCTTCTCCGCGTCCTTCGTGTTCGCCATCGTGTCTGTCTTCGACAGCCTGAGCGATCAGGGCCTCGCCTTCGTGCTCGCCCCGACCTCTAACCTCTCATCGGCCAACGGCGGACAGTACCTAGGCCTCCTCAACGCGACCAACGGCACCGCGAGCGACCACATCTTGGCCGTCGAGCTAGACACCATCCGGAACCCCGAGCTGAGCGACATCAACAGCAACCACGTCGGCATCAACGTCAACAGCCTCATCTCGCAGCAGGCCAAGCCCGCCGGCTACTACGGCGACGACGACGACATGGCCTTCCGAGACCTGATGCTGATTAGCCGCAAGCCAATGCAGGTGTGGGTGGACTACGACGGCCACGGCAGGAGACTCAATGTGACATTATCTCCCGTGCAAGTTCCCAAGCCCAAGAATCCTTTGCTCTCTGAAACCATTGACCTCTCCACTATCGTGGCGGACACGATGTATGCTGGCTTCTCATCATCGTCGGGCGTGGTGTCCACGCACCACTACGTCCTCGGATGGAGCTTCAGCTTCGACGGACCTCCTCCGCCGCTCGACTTCTCTAAGCTGCCCAGCCTACCGCGTGTGGGTCCCGAACCTCCGTCCAAGACCCTGTACATCGCTCTACCATTAGCAATCATATTGCTCATCGCTGCAGTCTTGGCTGTTGCGTTCATCGTGCGGCGTCGGCGTCGGTTCGCTGAGGTGCGCGAAGACTGGGAGGAAGATTTCGGCCCACACCGATTCGCATACAAGGACTTGTTCCATGCCACAGACGGGTTCAAGAACAGAAATGTGCTCGGTGTTGGAGGGTTTGGAAAAGTATACAAAGGGGTCCTTCCGGTGTCTAATTTGGAGATCGCCGTCAAGAGAGTGTCGCATGACTCAAGGCAAGGAATACGTGAATTCATTGCCGAGGTGGTGAGCATTGGTCGTCTCCGGCACCGGAATCTCGCGCAGCTGCTAGGCTATTGCCGGCGCAACGGTGAACTTCTGTTAGTGTATGACTACATGGCAAATGGCAGCCTTGACAAGTACTTGTACAATAAGAATGGGCCACCTCTATGTTGGCCTCAAAGGTACTGGATTATCAAAGGCATCGCGTCAAGCTTATTGTATCTCCACGAGGATTGGGAGCAAGTCGTCATCCACCGAGATATAAAAGCAAGCAATGTGCTACTGGATAGGCAGATGAATGGACGGCTCGGTGACTTTGGTCTTGCAAGGTTATACGACCATGGCACGGATGCTCAAACAACACATGTCGTTGGTACCATGGGATACCTTGCGCCAGAACTCATGCGCACGGGGAAGGCAACACCCTCAACCGATGTATTCGCATTTGGTGTGTTTCTCCTAGAGGTCGTCTGTGGGCGCAGGCCAATCGGGAGTGATGAGCATAACAATCCGGTGGTGCTGGTCGACTGGGTGCTTGAGCACCACCGCAATGGCTCAATCATCGATACTGTGGATTCCCGGCTCGAGGGAAATTTTAACAAGGAAGAAGTAAGTATCGTGCTCAAACTAGGTTTGTTGTGCGCGCACCCATTGCCAACCGCAAGGCCTAGCATGCGAAAGGTCATGCAGTACCTCGACGGTGACCAAGCTGCCCCTCATTTGACTCCGACCTACATGAGCTACAACGAGATGGCCTTGATTCAGAGCGAAGGGTTCGATTCATACATCACACCATGCCCTTCACCGGCGATGGGCATTTGCAGCGGATCTGGTGAGTCTTTGGTGACAGTTCTGTTCAGTGGAAGATGA
>HvleckRLK76
ATGTTTCTCCAGCCTCACCACTTGGTCACTCTGCTCCTGCTCCTGGTGGGCGCCGATCTCTGGCACCCGGCCACCGGTGGTGGAAGCAGCAGCGGCGATGACGGTCGGCAGTTCGCCTACAACGGGTTCGTGGGTGCCAACCTGACGCTCAATGGCGGCGCCACCGTCACGCCGAAGGGCCTCCTCATGCTGACCGATGGCACCCTTCAGATGAAAGGCCAGGCCTTCCACCCGTCCCCGCTGCCGTTCCACGCCGAGGCTAACGGCACCGGCGTTATGCGGTCCTTCTCGACCACTTTCGTCTTCGCCATCTTCGGGCCGTACGCCAACCTGAGCAGCCACGGACTGACCTTCTTCGCCTCAGCGTCCAGGGATGTGCTCTCCACTGCGCTTCCAGGCCAGTTCTTGGGCCTCCTCAACGGCACCAACGGCAACCAGACCGCCCCTATCTTCGCCGTGGAGCTCGACACTCTCCTCAACGCCGATTTCCGTGACATTAGCAGCAACCATGTCGGCGTCGACATCAATAGTCTGATATCCATCGATTCCGCTGACGCCGGATACTACGATGATAGCACAGGTAGGTTCCAGAACCTAAGCCTGATCAGCCGGAAGGCAATGCAAGTGTGGGTGGACTACGATGGCGTGGCCACGGAGATCACCGTGACCATGGCTCCCCTGGGCGTGCCCAGGCCCAGGAAGCCGCTCCTGCGGACCGCCGTCGACCTCTCGGGTGTGGTGCAGAGCACGGCGTACGTTGGATTCTCGTCGGCGACGGGCGTCATGTCCACGCGCCACTTCGTCGTCGGCTGGAGCTTCGCACTGGACGTGCCAGCCCCGGCACTGGACATCTCGGCGCTGCCGGTCTTGCCGCGCGCCTGGCCCAAGCCGCGGTCGAGGATCCTAGAGATTGTGCTGCCTATAGTGTCAGTGATGCTGGTTTTTGCAGTAGGCATCGGAGTGTGCTTCTTTGTACGACGGCGCCACAAGTACTCCGAGCTGCGTGAGGACTGGGAGGACGCGTTCGGCCCCCACCGATTCTCTTACAAAGAATTATTTCATGCGACCAAGGGGTTCAGCAACAAGAACCTGCTCGGAGTAGGAGGCTTTGGAAGTGTGTACAGGGGTAAACTCCGCAAGCCTGACAAGGAGATCGCCGTAAAGAGGGTCTCCCATGAGTCGAGGCAGGGGATGAAGGAGTTCGTTGCCGAGGTTGCAAGCATCGGACGACTGCGGCACCGGAACCTCGTGCCGCTGCTTGGTTACTGCCGCCGCAAGGCGGAGCTTCTCCTGGTTTACGATTACATGCCAAACGGAAGCCTTGACAAATACTTGTATGATGCGTCAGTGGGTACACTGGATTGGCGTCAAAGATTTCACACAATCAGAGGGGTGGCTTCTGGGTTATTGTACCTCCATGAGGATTGGGAGCAAGTTGTCATCCACCGAGATGTGAAAGCAAGCAATGTTCTCCTAGACAGCGAGATGAATGGGCGGTTAGGGGATTTCGGCCTTGCAAGGTTGTACGATCATGGAGCAGACGCCCATACAACACATGTGGTTGGCACCATGGGCTACCTAGCTCCCGAGCTAGGACACACCGGCAAGGCAACCCCGTCTACCGATGTGTTCGCTTTCGGTGCATTCCTTCTGGAAATCATCTGTGCACGGAGGCCAATTGAGCAAAACGACCGCAACAGCCGCATCGTGCTCGTGGATTGGGTGATCGAGCAATGGCGCAACGGTTCGATTATTGATGTGGCAGATACAAGAATTCCAGATGGGTTTAATCCGGACAAGGTCTCACTGGTACTGAAACTAGCACTGCTCTGCTCGCACCCTCTGCCCACCGCGAGGCCAACCATGCGGCAAGTCATGCAGTACCTCGACGGTGACATGCTCCTCCCAGACCTGTCACCGGCGTACCTCAGCTTCAGCATGCTGGAGCGGATGTACAACGGGGAGTTCAACCAGAACGTGATGCCATACACTTCATCAACGAGCGTAGGTGCCATTTCTGATCTCTCGGGAGGAAGGTGA
>HvleckRLK77
ATGAGATCGAGAGCCACGGGAACTTGCTTCATGGCTCTCCAGTTCGTCCTATTCTTCACTTTCAATATTGCCGGCGTCAGTCCTCTGTCCTTCAAGCTGAATTTCACCGAATCCAACTATACTGCGTCCACCGCAATCAAGTTCCAGGAGGACGCCTTCTACAACAAGGGGATCAAGCTCACCAAGGACCAGCTCAAAGACCAGATCACTAACAGTGTAGGCCGAGCAGTCTACACCGATCCAGTGCTTCTCTGGGATACCGCCACTGGCCAGTTAGCCGACTTCTCAACCCGTTTCACCTTCAGGATCACTGCCACAAACACAAGCGCAACCGACGATCCATACGGTGAGGGCCTAGCCTTCTTCCTCTCACCATACCCTTCTGTGGTTCCCAATAGGTCCACTGGTGGTTTTCTTGGCCTTTTCAGCAATGGGAGTGATCAGAATGACCCATCTAATGAGCTCGTGGCTGTTGAGTTCGACAGCCACGATGACACATGGGATCCAAAAGGCAACCATGTGGGCATTGACATCCATTCAATTGTATCCGTAGCCCACGTGGTGTGGAATAGTAGCATTAATGATGGTCGCATAGCCAATGCGTGGGTAAGTTACAAGGCCAGCTCCTTGACCTTGAGCGTCTTCTTGACGTACCTGGGGGATCCACAATTCAGTGGCAACTCCAGCTTATCTTATTCAGTTGATCTCAGAAAATACCTCCCAGGCAAAGTGGCCATTGGCTTCGCAGCTGCCACGGGTAGATTCGTTGAGCTCCATGAGATACTTTTCTGGGAATTCAATTCTACGGATTTGCAGCTGATGAAGACTGAGAAGATGAGAAGTGTACTGGTCATAAGCTTGGCTACTACCATAAGTGTCGTGGTCTGTTCTATGTGCTTGGTTTGGTGCCTTCTGCATTTTAGGACTAGAAGATCAAGAAATGAGAAACAAAAGAAGCTAGGGTATCATGAGTCCATTGATGGTGAATTTGAAAAAGGGAGCGGCCCAAGAAGATTTCGGTACAATGAACTTGTGGCTGCCACAAGGAACTTTGCTTTGGAGAGAAAGCTTGGAGAAGGAGGATTTGGCGCAGTCTATCAGGGCCTTTTGAAGGATCAAAACCTAGATGTTGCCATAAAGCGAGTGGCAAAAGGGTCTACACAGGGAAGGAAGGAGTACATATCTGAGGTCAAGATCATCAGCCGGCTGAGGCATCGCAACCTTGTGCAGCTTGAGGGCTGGTGTCATGAGCATGGAGAGTTTTTGCTTGTCTACGAGTTCATGCCAAACAGGAGCTTGGACACACACCTCTATGATAACAGTAACTTGCTAACATGGCCATTGAGGTTCAAGGTCACCGCAGGTGTTGCATCTGCCCTCCTGTACCTCCACGAGGAATGGGAACAATGTGTCATTCACCGTGATATCAAACCGAGCAATGTCATGCTTGATTCGGTATTCAATGCCAAGCTTGGTGATTTTGGGCTCGCGCGGCTCATTGACCACGACCGAGCCTCGCAAACTACAGTGTTAGCTGGGACAATGGGTTACATGGCTCCAGAGTGTGTCACCACTGGCAAGGCAAGCAAAGAATCTGATGTCTACAGCTTCGGAATTCTTGCACTGGAGATTGCATGCGGAAGGCGACCGGTTGTGCTAAAGGAAGACGATGACAAGGTTATATTGGTTCAGTGGGTATGGGATCTTTATGGAAGAAACAAGATTCTTAATGCAGTTGACAGCAGGCTTGACGGTGCATTTGAAGATAGAGATGCAGCATGCTTGATGGTTGTCGGACTGTGGTGTGCACATCCAGATTACAATCTTCGACCTTCGATTCGTCAGGTCATAAGTGTACTGAAGTTTGAAGCACCATTGCCAATCCTTCCCCCGAAGATGCCAGTGGCAATGTACTTTGCACCGCCAATTTCTCTGTGCAGGTTTTCATACACCTCATCTGATGGAACACTCAAGCAGCAGGAGCTGGAGAGGTCCAATGGTTATGGAAAAACAAGCTCATCCACTACAACCAATGCATCCAGTTCACCTCCTTCTGTGCGGTTGCCAGAGGTGGGCTACTAA
>HvleckRLK78
ATGCCGCCTCCCGACCGAGCCATGCCGCTCCTTCTCCTGCTCCTCTTCCTCGGCCTCGGCCCGGCGGCGGCGGCGGACGAGCAGTTCGTCTTCGACGGGTTCACCGGCGCGAACCTCACCATGGACGGCATGGCCACGGTGACCGCGAACGGGCTGCTCCAGCTGAGCAACGCCACTAGCCAGCTCAAGGGCCACGCCTTCTTCCCGACGCCGCTGCAGTTCCACCGGGCGCCCAACAGCACGGCCATGCAGTCCTTCTCCACGGCCTTCGTCATCGGCATCATCGGCGCCTACGACACGCTCAGCAGCCACGGCATGGCCTTCGTCGTCGCCAAGAGCCGCAACTTCACCTCCGCGCTGCCGGGCCAGTTCCTGGGCCTCGTCGGCTCCGCCAACAACGGCAACGCCACCAACCACCTCTTCGCCGTGGAGTTCGACACCATCCTCAACTCCGAGTTCAACGACATGAGCGGCAACCACGTCGGCATCGACGTCAACGGGCTCAACTCCGTCGACGCCGACAACGCCGGCTACTACGACGACGGCACCGGCGCCTTCAGGAACATCAGCCTGGTGGACCGCAAGCCGATGCAGGTGTGGGTGGACTTCGACGGCCAGACCATGCAGGTCAACGTCACCATGGCGCCCCTGCAGGTGGCGAGGCCCAAGAGGCCCCTGCTCTCCACCACCGTCAACCTCTCCTCCGTCATCGACGACACCGCCTACGTCGGCTTCTCGTCGTCCAGCGGCATCCTCTTCTGCCGCCACTACGTGCTCGGGTGGAGCTTCAAGATGAACGGCGCCGCCCCGGCGCTCAACATCTCCTCGCTGCCGTCGATGCCGGTCACGTTCCCCAAGCCGCGGTCCAAGACCCTGGAGATCGTGCTGCCGATAGCGTCGGCGCTGCTCGTCTTCGCGGTGGCAGCCGCCGTCTTCGTGTACATGCGGAGGCGGCGCATGTTCGCGGAGCTCAAGGAGGAGTGGGAGGTCACCTTCGGGCCGCACAGGTTCTCGTACAAGGACCTCTACCACGCCACCGACGGGTTCAGCGACGAGCGGCTGCTCGGCATCGGCGGGTTCGGGAGGGTGTACCGCGGCTCGCTCCCCAAGTCCAAGTCGGCGGAGATCGCGGTGAAGAAGGTGGCGCACGGGTCGAGGCAGGGGATGAGGGAGTTCGTGGCGGAGGTGGTGACCATCGGCCGGCTCCGGCACCGCAACCTGGTGCAGCTGCTGGGCTACTGCCGGCGCAAGGGCGAGCTGCTGCTGGTGTACGACTACATGCCCAACGGCAGCCTGGACAAGCACCTGTACGGCGACCAGAAGGAGAAGGCAGCCCTGGGGTGGGGGCAGAGGTTCGGGATCATCAAGGGCGTCGCGTCCGGGCTGCTGTACCTCCACGAGGACTGGGAGCAGGTGGTGGTGCACCGCGACATCAAGGCCAGCAACGTGCTGCTGGACGCCGACATGAACGGCCGGCTCGGCGACTTCGGGCTGGCGCGGCTCTACGACCACGGCACGGACCCGCACACCACGCACGTCGTGGGCACCATGGGGTACCTGGCGCCGGAGCTCGGGCACACGGGCAAGGCCTCCAAGGCGTCCGACGTGTTCGCCTTCGGGGCCTTCATGCTGGAGGTGGCGTGCGGCCGGAAGCCGGTGGTGCTGGACGCGCGCGACAACCACCTCGTGCTCGTGGACTGGGTACTCGACCAGTGGCGCGCCGGCACCGTCACCGGAGCCGTCGACCCGCGCCTGGGCGGCGACGTCGTGGAGCACGAGGCGGGCCTGGTGCTGAGGCTGGGCCTGCTGTGCTCGCACCCGCTGCCCGCCGCGCGCCCGACCACGCGGCAGGTGGCGCAGTACCTCGACGGCGACCTCAAGCTGCCGGAGCTATCGCCCACGTACCAGAGCTTCAACATGCTGGCGCTTATGCAGGACCAGGGCTTTGATCCCTACGTCATGTCCTACCCGATGACCTCCATCACCGCCGGTACCATGTCCCAGATGTCCGACCTCTCCGGAGGAAGATGA
>HvleckRLK79
ATGGTTGCAGGAAGCCATCGGAACCATTTAGCCATGCCAATACCCAATACCAACAACATCTTGAGCTTTTCCTGTATAGCGTCTGCAGCTGTTGTCATCCTAGGCAGAACTTGTAGCTGCTTGCAGTTCACTTACCCCAGCTTCAACGCAAGCAACAGGGATGATTTCAGCTTCAGCCCAGGCTCAGCAATCTCAAACAAGTCGCTGCAGATCACGCCCAACACCGGGAACATGAGCCACCGGTCGGGAAGAGTGGCCTATGCAAGGGACACCCTCAAGCTGTGGAACAGCAAGCGGACGGAGCTCACGTCGTTCAGGACAGAGTTCGTGCTCAACATCCTGCCACAGAACGGGACTGGAGAAGGTATGGCCTTCATGCTCACAAATAATCCATCTTTGCCCAGCAACAGCAGCGGCCAGTGGCTGGGCGTGTGCAACAACCGCACAGACGGCGCGAAGACGAACCGGTTAGTAGCCGTGGAATTCGACACGCGGAAGAGCTACAAGGATGACCTTGATGGCAACCATGTTGGCCTCGACTTGAACAGCATCAAATCTGTTGAGCAATACCCACTGAGCAATCAGTCCATCGTCCTCTCAAGTGGGTCTGATGTATTGGTCGGGATCAATTACGATGGTGCATCACTGCTGTTTCGAGTAACTCTCGTCCAATACAGCACAAGTGGGCAGCAGCATGTTTCCCTGTTAAGTCGGTACATTAACCTGTCAGTAGTTTTACTGGACGACATATATCTGGTGTTTGCAGGTTCCACGGGCAATTTCACCCAACTGAACCAGATAAAGTCGTGGAACTTCACCACAATAGATGACGATGCCACAGTTAGAAGAGAGCATTATTGGAGAAGAAAGTTGCTTTTGGCTCTCGTTACATTGCTTGTGCTTTCTATATGTGTGTTTGTCGGGCTGTTCATGTGGAGAAGGTTGACGCGGCGGAGAAGGCTTGCCTACCATAACCTGGAGAAGATGATCGACGCACACGGTCCTGTCAAATTTAAGCTCAGGGAGCTCAGGCGTGCGACTGCCAACTTCAGTCCTACCCGCAAGCTCGGCAGAGGGGGCTTTGGCACTGTTTACCTTGGATACGTGGATAGGATGAACTTGGAGGTGGCCGTCAAGCGGGTGTCGACGGACAAGAAGGCCGACACCAACCGCGGCGAGAAGGAGTTCGTGGCGGAGGTGAACACGATCAGCAAGCTGTCGCACCGGAACCTCGTGAAGCTAATCGGCTGGTGCCACGAGAAGGGCGAGCTGCTGCTCGTCTATGAGTACTTCCCCATGGGCAGCCTGGACAAGCTCCTCTACGCCAGAGAAAGGACCATGGCGTCATCGTCGGCATCCAGATCCAGGGACACCCCGGAGCCGGAGCTTACCTGGGAGCGGCGGTACAAGATCATCTGCGGCGTAGCATCGGCGCTGGACTACCTGCACCACGGGAGCAGCAAGCGGATCCTCCACAGGGACGTCAAGGCCAGCAACGTGATGCTTGACGCGGAGTACAACGCGCGGCTGGGGGACTTCGGCCTCGCCCGCGTCATCCAGCACGACGGCGTCACGCACCACTCCACGCAGGTCGTGGCGGGGACCCGCGGCTACATGGCGTACGAGAGCTTCTTCACCGGCCGCGCCAGCCTCGACACGGACGTGTACGCGTTCGGGGTCTTCATCATGGAGGTGGTCAGCGGGAGGAGCCCCAGCAACGCCGTGCAGCAGCAGCACATGCACAACAGCGACCACCATGGCGAGGAGGATTACTCGAGCAGCGGGGGAGCGCGGCACCCCATGCCGGTGCACATCGTGGACTGGATATGGAGGCTCTACGGCGAGGGGAAGGCGTTGCATGCCGCCGACCCATTGCTCGGCGGCGAGTTCGAGCAGGCGCAGGTGGACTGTGCGGTGAGGCTGGCGTTGGCGTGCTGCCACCCGAACCCGAGGGAGAGGCCGTCCATGAGGACGGCGGTGCAGGTGTTGATCGACGGTGCCCCGGCACCGGAGCCGCCGGTTAATAAGCCAGCGTTCGTTTGGCCTCCGGGCGGCAATCAGCGGGAGATGGAGCTGCCGGACGTCGGGTTGCTGTTCACGGGAGGGGCCAGGCAGCACAGCAGTTTCTGCTCCATGACCTCCACTTCCCTCGCGGGGAGGTGA
>HvleckRLK80
ATGGAGCATCTAGCCTTCTGCTTAACCTTCCTCCTCTCGGTAACCATATTCCTTGCATCCTCTGCCACCGCTAGTGAAGATGACCAGTTCATCTATTCCGGCTTCTTTGGCAGCAACCTTACCCTCAATGGTGCAGCCATGGTTACAAAAGATGGGGTCCTTGAGCTCACCAATGGGAAGCCTGACTATATGGGCTATGCATTCTACCCATCTTCATGGAAGCTCCGCGGACTGCCTGATCGGGAGGTGCAGTCCTTCTCGGTATCCTTTGTCTTTGGCATAGCCTCTGTCGACTTTAATGGTTGTCCCAACAGCATGAACTTTTCTATCCATCAAGGTCTCACAAATAAGAGCATGCTTGCAATCGTGCTTGAAGCTTGCCACCAAGATAACAACTTCCAGGAAAACAACGACAACGATGTCAGCATCTCCATCGGAGGTAAAAGCTCGGCAAAATCTCCTGCTGGTTTCTATGATGGCAAGAGTGGCATTTTCAACAACTTGCCCCTCCTTAGTCACAACATGATGCAAATGTCGGTGGAGTATGATTTGGCGGCCACACAGATCAACGTGACCTTGTCCCCCCTCGAGATGGTTAAACCGTTGAGGCCATTGCTATCCCTTTCCCTCAACCTCTCAACAGTGCTGGAGGATCCATCATATATTGGTTTCTCGGCTTCAACTCGTATAATCAGCTTGAGATATAGTGTGCTTGGCTGGAGCTTTGGTATGAACCGTCCTGCTCCAACCATAGACATTGCCAAGTTGCCACAGTTACCTCGGGTCGTTGACCCAAAACGTCAATCCAAACTGTTGAAGATCATACTGCCGATAGCCATGGCCACACTTGTCCTACTTGTGGGCACAACGGTCATTCTATTTGTGCGGGGGAGAATGAGGTACGCTGAACTATATGAAGATTGGGAGCATGAGTTTGGGCCACACCGCTTCTCCTACAAGGATCTTTTCCAGGCTACAGAAGGATTTCATAATAAGAATCTGCTTGGCCGTGGAGGATTCGGGAAGGTGTATAAAAGTGTGCTTCCAGTCTCTAAGCTGCAGGTTGCTGTGAAGAGGGTGTCCCATGAGTCAAAGCAAGGAATCAAGGAGTTCATCGCCGAGGTTGTCAGTATAGGCCGCCTCCGACACCGCAACCTTGTCCAGTTACTTGGTTATTGCAGGAGGAAAGGTGAACTCTTATTGGTGTATGAATATATGCCAAACGGTAGTCTTGAAAAGTATTTGTATGTTGAAGCAGACAAGACCACACTCGACTGGGCTCAGAGGCTTCAGATCATCAAAGGTGTTGCATCTGCCATATTCTACCTCCATGAGAAATGGGAGAAAGTTGTCATCCACCGAGACATCAAAGCAAGCAATGTTCTTCTTGACAATGAGATGAATGGACATCTAGGTGACTTTGGCCTTGCAAGATTGTATGACCGTGGCACCAACCTACAAACAACACGTGTGGCTGGTACCTTGGGATATATAGCCCCAGAGCTAGCACGCACCGGTAAAGCATCCCCTCTAACAGATGTGTACGCATTTGGCATTTTCATTCTTGAGGTAACCTGTGGGAAAAGGCCGATCAACAACTGTTCACAGGATGGTCCAAAGATGCTAGTCGACTGGGTTGTCGAGCATTGGCAGGGAGGATCACTGACAGACACACTGGACAGGAGGATACAAGGAGAGTATGATGCTGATGAGGTAAATCTCGTGTTACGGCTAGGACTCTTGTGTGCACATCCATTTTGCAGCACGAGGCCTAGTATGCGGCAGGTTATGCAATACCTTGACGGTGACATGCCGCTCCCCGAGCTTCCACCCATAAACTTAAGTTATAGCATGTTAGCCCTAACGCAGAACGAAGGTTTCGATCAATACACGTCATTGCCTTGCACAGTTAGCAGCAATGGCATGACGTTTAGCCTCTTCAGTGGAAGATGA
>HvleckRLK81
CGAGCGAGCCAGCGACCGCCGACCGGTATGGCCAGCTTTTCGAGCGCCACCACATCCACCTGTTTTCTCCTCCTCCACCTCGTCATCATCTTCTTCCACCTTCCAACTCCTGCCGTCTCCTTGGCGTTCAACTGCTCCAGGTTCACCACAGAAGACCTAAAGGACATGAAGTTCGAAGGCGACGCATCCTTCAACACATTGTATGGAAGTATCCCCATGAACACGAATACGTACCGTGTTGCCAGCCGGGTGTCGTACAGCGCTGCACCGCTGCAGCTCTGGGACAAGATGACCGGCGAGGTGGCCAGCTTCACCACGCAGTTCCAGTTCCAGATCCATATCACCGGTGACGAGAGCAGCAAGGGGGGCATGGCCTTTTTCCTCGCCGGCTATCCGTCTAGCCTGCCTGGCAATTGCACCCCCGACAGCCTCGGCCTCACTAACCAAAGCGCAGACGCCGTGCCGTCCGGTGATAGCCGGTTCGTGTCGGTGAAGTTCGACAACTTCAACAACACAATAGTAGCTGACCCCGACACCAGCAGCTACGACCACATCGGCATCAATGTCAACTCCCTCATATCGGTGAGTACACAGCCCCTGCCGAGCTTCACCCTCAACAACACCCAGACCGCCCAAATCGAGTACGACAATGTTTCCAGCATCTTAGCTGTGACATTATGGAGCGATGATGCAGATGGCCAAGACCAACGGAGTTCCAGCCTTAGCTCCAAGGTTGACTTCAAGAGCGTACTACCGGAGCAGGTCTCCATTGGCTTCTCCACGAACACGTTGTCGGGGATGGATATATTTCTAAACTCTTGGTACTTCAACTCTTCATTGGAACCACAACAAACACCACCACCACCACCATCATCACCACCACAATCCCCACCAGGGCTAGGTTCTGGAGTTATAGTCGGAGCAGCTGCCGGCGCAACAATGTTCCTCGTCCTCCTCTTTGCCGCTGCAGCGGCACTTGTAGTGCGCCGCCGTCGTCATCAGAATATGATGGAGACGGAGGAGTACTACACAGACTCAGAAGGCGAAGGCGAGCCGATGTCGGAGATCGAGATGGGGACGGGGCCAAGGCGGTTCCCATACCGCGAGCTCATGGAAGCAACGAAGAACTTCGCCGCAGAGGAGAAGCTTGGGCAAGGCGGCTTTGGCGCCGTATACCAAGGCTATTTGAGAGACCCGGCTGGGCTAGCCGTGGCCATCAAAAGGTTGCAGTCTTCCATACAAGGAAAGAAGGAGTACAAATCCGAGGTCAAGGTGATAAGCAGGCTGCGTCATCGGAACCTCGTGCAGCTCATCGGCTGGTGCCATGGCCATGATCAGGAGCTCCTGCTGGTCTACGAGCTCATGCCCAACCGCAGCCTCGACATCCATCTCCACAGCAAGCAGGGCACCTTCCTCACATGGCCAATGAGGATGAAGATATTGTTGGAGCTTGGGTCTGCACTGCTCTACCTCCATGAAGAGTGGGAGCAGTGCGTGTTGCACCGGGATATCAAGCCCAGCAACGTGATGCTCGACGAGTCCTTTGGAGCCAAGCTAGGCGACTTTGGGCTCGCGAGGCTCGTTGACCACGCCGCCGGGATGCAGACCATGACCGCAATCTCTGGAACTCCAGGCTACTTGGACCCTGAGTGCGTGAACACCGGCAGGGCCAGCGCCGAGTCCGACGTGTACAGCTTCGGCGTGGTTCTACTGGAGGTGGCATGCGGCAGGAGGCCAATGAGCGTAATCGCACCCAACCAACACCAGCAGAAGAACGGCGGCGTCTTCCGGCTGGTCGAGTGGGCCTGGGGACTCTACGGCCGGGGAGCCATCCTTGAGGCCATCGACGAGCGGCTGAACGGTGACTACGACGCTGCGGAGGTGGAGAGGGTGATGGTCATCGGGCTCTGGTGCGCGCATCCAAACCCGAGCGCGCGGCCGTCCATCAGGACAGCCATGGCCACTCTCCAGCCCAAGGTCGACCAAGCCTACCAACTGCCGATGCTTCCTTCCAAGATGCCGGTGCCGGTGTTTGAGCCGTTCGCCTTGGCCAATGCCGTTGGGATGTCATCGTCGTCCTCCCACACCTTTGGGGTGTCGTCGTCGACGTGGTCCAGTATGCCACCGCACACCTCTGGTACCGCATCCTCCGACGCTAGCACTTCAACAAACAGTTCAAAGACCTCTTCTTCGCTACTCAAACATTAG
>HvleckRLK82
TCCAGGCGTCCATTTGGCTCTATTTCCTCATTCTCAACAACCTTTGTGTTCCTCATCATGCCTATGGACAACAACGATGGGGTGAGTGCGCATGGGCTTGCCTTTGCGCTTTCATCCACGATGGACTTTGTGTTCGATGCCCTCCCGGGTCCTTACTTGGGCTTGACCAACATGGAAAGGAACGGCAATGGCACAAACCAATTCTTTGCTGTTGAGCTTGATACAATTAAGAATCCCCAATTTGCTGATATTGATGACAACCACATTGGTGTCGATGTAAACGGCATGGAGTCCATCTATTCCCACACGGCTGGTTACTACACCTCAAATGGTATGTTCTCTCCATTGAAGCTTGCTAGTGGTAAACCGATGCAAGTATGGGTGGACTATGATGAAATCTCACACACCATTAATGCCAGTTTGGCGCCTTACTTAGAGCTCAAGCCGCACCGTCCATTATTGTCAAGCAATGTTAATCTTACGTCTGTGTTGGCAAACAACTCATTCTATGCTGGGTTTTCATCTTCAACGGGACTCCTTAAGTCAAGGCATTACATTATTGGATGGAGTTTCAACACAACTGGGAAGGCTCATCCACTTAACTACGCATCCATGTCTCTAATTATAGAAGAAGTTAGACATACAACACAAAATCGTTCACGTATTCCCCGAGCCATTCTTGTACCAGTTGTCACTCTACCAGTGATGACCGCACTTGTTATTATTGTCATTTATGTTCTTAGGAGGAAGGCAAGGAAGAATTCCGAGTGGGAAATTGAGACCGGGCCACCATCTTTCACATATAAAGATCTAGCCACTGCAACAAGAGGTTTCAATAACATGATGCTACTAGGGGAAGGTGGATTTGGGAAGGTGTATAAAGGAGTGCTACCAACTTCAAAGCAAAATGTTGCAATCAAGAGGATTTCTCCAGAATCAAAGCAGGGGATGAAGGAGTTCATATCCGAGATTGTCACACTTGGTCATCTCCGACATCGCAACCTTGTCCAATTGCTTGGCTATTCTCGTCATGGAAATGAGCTCCTTCTAGTTTATGATTACATGCCAAATGGTAGTCTTGATAGATTTTTGCATGGTCAAGATAGGCAAGCATTGAACTGGGTTCATAGGTTTGACATTATAAAAGGCATCGCATCTGGTCTTTTCTACCTCCATGAGGATTGGGAGAAAGTTGTCATCCATCGAGACATCAAGTCAAGCAATGTCCTTATCGATAACGAAATGAACTCAAGGCTTGGTGATTTTGGCCTTGCAAGATTGCACAACCATGGAAATGGGACTGGCGGCCACATCACAAATTTGGCCGGCACCATGGGTTACATTGCTCCCGAGTTAGCTACGCTTGGGAGGGCAACCAAGGCGACCGATGTATTTGCATTTGGTGTGTTCATGTTGGAGGTTGCTTGCGGGAGGCATCCGATAGGAGTGAGTTATTCTGGTGAGCCGGTGCTGCTAGTAGATTGTGTGCACTATGCATGGCAACACAATTCAATCCTTACAACAGTAGACCCAAGGCTGGAAGATTATATCATGGACGAGGTAGATTTAGTTCTAAAGCTTGGCCTATTATGCTCTCATACAATACCTACTTGTAGGCCATCCATGCGCTTAGTTATGCAGTACCTTGGAGAGGGTGCACCACTTCCAGATTTGCCACCAATTTTGAGCCTTACAAGAAGAGATCAAGGTTTTGATCAACATATCATGTTATCCAGTTCTCCG
>HvleckRLK83
CGTACGTCCTCCACCATGGAGAGTGCGTTCAAGCTTGTCCGGCTCCTCTTCCTAGTTTGCCTTACTCTAGCAGCCAGCGCCGCCGGCGACGGCGACGACCAGCTCGTATACTCCGGTTTCACCGGCGCCAACCTCACCTTGGACGGCGCGGCAACGGTGACGTCGGACGGCCTCCTCGAGCTCACCAACGGAACGGACCAGCAGAAGGGCCACGCCTTCTACCCAACCCCGCTGCGCTTCGCCGGAGGGTCTCCCGGCGGCGGCGGCGTGCGGTCCTTCTCGGCCTCCTTCGTGTTCGCCATCCAGTCCGTCTACACGGACCTGAGCGCGCACGGCATGGCCTTCGTGGTGGCGTCGAGCAACAACTTCTCGTCGGCGCTGCCCGGCCAGCTCCTGGGCCTCACGGACGTCCAGAACAACGGCAACGGCAGCAACCACTTCTTCGCCGTGGAGCTCGACACCATCCAGAACAAGGAGTTCGGCGACCTCAACGCCAACCACGCCGGCGCCAACGTCAACGGCCTCCGGTCCCTGCAGTCCTACTACGCCGGCTACTACGACGACGGGGACGGTAGCTTCCGCAACCTGAGCCTGATCAGCCGCGAGGCCATGCAGGTGTGGGTGGACTACGATCACAGGATTGCGCAAATCACCGTCACCATGGCTCCCCTCAACGTGCGCAGGCCAGTAAGGCCGCTGTTCAGGGCGACATACAACCTCACGACGGCGGTGACAGACGTCGCGTACGTCGGTTTCTCCTCCGCGACCGGCACGATCAACGTGCGGCACTACGTGCTTGGCTGGAGCTTCGCCATGAACGGCCCTGCTCCGGCCATCGACATCGCGAGGCTGCCAAGGCTTCCGCGCATGGGACCGAAGCCACGGTCCAAGGTGCTGGACATAGTTCTGCCAATAGCATCCGGAGCCTTCGTCCTCGCCTTGGGCGCCATCGTTCTGCTGGTGCTACGGAGACGTTTCCGGTACGCGGAGCTGCGGGAAGACTGGGAGGTCGAGTTCGGTCCACGGCGGTTCTCCTACAAGGATCTGCACCGTGCGACGGAAGGTTTCAGCGACACGCAGCTGCTAGGAATCGGAGGATTCGGGAGGGTGTACAGCGGCATCCTTCCGGCGTCTAGAGTGGAGGTTGCTGTGAAGAAGGTCGCGCACGACTCGAAGCAGGGCATCAAGGAATTCATCTCGGAGGTGGTGAGCATAGGACGTCTCCAACACCGCAATCTCGCGCCATTGCTCGGCTACTGCCGACGCAGAGGTGAATTGTTTCTGGTGTACGAGCACATGCCGAATGGGAGCGTTGACAAGTACTTGCACGGTAGAGAAGGGAAACCCATTCTGAATTGGGCTCAGAGATGGCACATCGTCAAAGGCATTGCATCATGTCTGGTCTACCTTCACGAAGAGTGGGAGAAAGTGGTCGTCCACCGCGACATCAAAGCCAGTAACGTCCTCCTCGACAGCGACATGAACGGAAGGCTCGGCGACTTTGGCCTTGCAAGGTTGTACGACCACGACGCCGACCCGCAAACCACACATGTGGTGGGAACCATAGGATACCTCGCTCCTGAGCTTGGGCATACTAGCAAAGCAACACCTCTCACCGACGTGTTTGCTTTCGGGGTGTTTGTTCTTGAAGTTGCCTGTGGGCAGAGGCCCGTCAATCCAAACTTGGAGGATGGTCAGGTATTGTTGGTCGAATCGGTGCTCGAGCAATGGACCAAGGGGTCGCTCCTTGATGCCGTGGATAAGCAGCTTGGGGGCAACTACAACGCCAATGAGGCATGTGTGGCTCTAAAGCTAGGCTTGTTGTGCTCTCACCCGTTCGCAAATGCAAGGCCTACTATGCGCCAGGTGACGCAATACCTTGACGGGGACATGCCATTGCCGGAGATGTCGCCGACGGATTTAAGCTTCCAGATGATGACCATAATGCAGAATGAAGGATTTGATCAATTCATCATGACATATCCTTCATCAACAGCGAGTATTGACAGCACATCTGTCCTTACAGTTGGAAGGTGA
>HvleckRLK84
ATGGAGAGTGCGTTCAAGCTTGTCCGGCTCCTCTTCCTAGTTTGCCTTACTCTAGCAGCCAGCGCCGCCGGCGACGGCGACGACCAGCTCGTATACTCCGGTTTCACCGGCGCCAACCTCACCTTGGACGGCGCGGCAACGGTGACGTCGGACGGCCTCCTCGAGCTCACCAACGGAACGGACCAGCAGAAGGGCCACGCCTTCTACCCAACCCCGCTGCGCTTCGCCGGAGGGTCTCCCGGCGGCGGCGGCGTGCGGTCCTTCTCGGCCTCCTTCGTGTTCGCCATCCAGTCCGTCTACACGGACCTGAGCGCGCACGGCATGGCCTTCGTGGTGGCGTCGAGCAACAACTTCTCGTCGGCGCTGCCCGGCCAGCTCCTGGGCCTCACGGACGTCCAGAACAACGGCAACGGCAGCAACCACTTCTTCGCCGTGGAGCTCGACACCATCCAGAACAAGGAGTTCGGCGACCTCAACGCCAACCACGCCGGCGCCAACGTCAACGGCCTCCGGTCCCTGCAGTCCTACTACGCCGGCTACTACGACGACGGGGACGGTAGCTTCCGCAACCTGAGCCTGATCAGCCGCGAGGCCATGCAGGTGTGGGTGGACTACGATCACAGGATTGCGCAAATCACCGTCACCATGGCTCCCCTCAACGTGCGCAGGCCAGTAAGGCCGCTGTTCAGGGCGACATACAACCTCACGACGGCGGTGACAGACGTCGCGTACGTCGGTTTCTCCTCCGCGACCGGCACGATCAACGTGCGGCACTACGTGCTTGGCTGGAGCTTCGCCATGAACGGCCCTGCTCCGGCCATCGACATCGCGAGGCTGCCAAGGCTTCCGCGCATGGGACCGAAGCCACGGTCCAAGGTGCTGGACATAGTTCTGCCAATAGCATCCGGAGCCTTCGTCCTCGCCTTGGGCGCCATCGTTCTGCTGGTGCTACGGAGACGTTTCCGGTACGCGGAGCTGCGGGAAGACTGGGAGGTCGAGTTCGGTCCACGGCGGTTCTCCTACAAGGATCTGCACCGTGCGACGGAAGGTTTCAGCGACACGCAGCTGCTAGGAATCGGAGGATTCGGGAGGGTGTACAGCGGCATCCTTCCGGCGTCTAGAGTGGAGGTTGCTGTGAAGAAGGTCGCGCACGACTCGAAGCAGGGCATCAAGGAATTCATCTCGGAGGTGGTGAGCATAGGACGTCTCCAACACCGCAATCTCGCGCCATTGCTCGGCTACTGCCGACGCAGAGGTGAATTGTTTCTGGTGTACGAGCACATGCCGAATGGGAGCGTTGACAAGTACTTGCACGGTAGAGAAGGGAAACCCATTCTGAATTGGGCTCAGAGATGGCACATCGTCAAAGGCATTGCATCATGTCTGGTCTACCTTCACGAAGAGTGGGAGAAAGTGGTCGTCCACCGCGACATCAAAGCCAGTAACGTCCTCCTCGACAGCGACATGAACGGAAGGCTCGGCGACTTTGGCCTTGCAAGGTTGTACGACCACGACGCCGACCCGCAAACCACACATGTGGTGGGAACCATAGGATACCTCGCTCCTGAGCTTGGGCATACTAGCAAAGCAACACCTCTCACCGACGTGTTTGCTTTCGGGGTGTTTGTTCTTGAAGTTGCCTGTGGGCAGAGGCCCGTCAATCCAAACTTGGAGGATGGTCAGGTATTGTTGGTCGAATCGGTGCTCGAGCAATGGACCAAGGGGTCGCTCCTTGATGCCGTGGATAAGCAGCTTGGGGGCAACTACAACGCCAATGAGGCATGTGTGGCTCTAAAGCTAGGCTTGTTGTGCTCTCACCCGTTCGCAAATGCAAGGCCTACTATGCGCCAGGTGACGCAATACCTTGACGGGGACATGCCATTGCCGGAGATGTCGCCGACGGATTTAAGCTTCCAGATGATGACCATAATGCAGAATGAAGGATTTGATCAATTCATCATGACATATCCTTCATCAACAGCGAGTATTGACAGCACATCTGTCCTTACAGTTGGAAGGTGA
>HvleckRLK85
ATGAGAGGCATGGCTCCGAGGGAGCACACCTTCTTCCTCCTACATGCCATCCCACTCCTCGTCCTTCTTCCCCTTGCTGCATCCACAACCAGCAACGACAGCTTCAACTTCCTGTACCAAGGCTTCTCCGGCGTCAACCTCACCCTCGACGGCAACGCTATGGTGACGCCGGACGGTCTCCTCGAGCTCACCAACGACACCATCAACCTCGGCCACGCCTTCTACCCGACCCCGCTGAGCCTGCGCGGGTCGCCCAACGGCACGGTGCGGTCCTTCTCCCTCAGCTTCGCGTTCGCCATCCTCTCCGTCCACGACGGCATAAGCGCCGACGGCATGGCCTTCTTCGTCGCCCCCACCAAGAACCTCTCCAACACGTGGGCGCAGTACATGGGCCTCCTCAACAGCGGCAACAACGGCAACGCGAGCAACCACATGTTCGCCGTCGAGCTCGACACCACCCAGAACGAGGAGTTCCAGGACATGGACAACAACCATGTCGGCATCGACATCAACAGCCTCGAATCCTTGCAGGCCCACCAAACCGGGTACTACGACGACGGGAGTGGATCCTTCAACAACCTGACCCTTATCAGTGGCAAGGCGATGCAGGTATGGGCTGACTATGATGGGGTGTCCACGCAGATCGACGTGTTCTTGGCTCCTCTCGGATTCGCCAAGCCGGTGAGGCCACTGCTTTCGTCTCCCTATAACCTTTCCACAGTTCTGAGAGAACCATCGTACATCGGTTTCGCCGCCACAACCGGCGCAATCAGCACGATCCACTGTGTTCTCGGGTGGAGCTTTGCCATCAATGGCCCAGCTCCAGCCATTGACATATCCAAGCTCCCAAAGCTGCCACGTCTTGGTCCTGAGCCTCGCTCCAAGGTCCTGGAGATCACCCTGCCTATAGCCACGGCCACATTCGTCCTTGTGGTGGGAACTGTCATCGTTCTGTTTCTTCGCAAAAGATTCAGGTACAGGGAGCTGCGGGAAGATTGGGAGGTCGATTTCGGGCCGCACCGGTTCTCCTTCAAGGACCTGTTCCATGCAACCCAAGGGTTCAAGGAAAAGAACCTGCTTGGTGTGGGCGGGTTCGGCAAGGTGTACAAAGGGACGCTCCCAAAGTCCAAACTGAAAGTAGCAGTCAAGAGAGTGTCGCATGAGTCAAGGCAAGGGATGAAGGAGTTCATCGCCGAGGTTGTCAGCATCGGCCGGCTCAGACACCGTAACCTTGTGCCCCTCCTTGGCTATTGCCGAAGAAAAGGTGAACTTCTTTTGGTTTACGACTACATGTCAAATGGAAGCCTCAATCAGTACCTGTACTGTGAAGATGGCAAGCCATCACTGAGTTGGGAGGAGAGGTTCCATATTATCAAGGGCGTCGCGTTCGGCTTGTTCTACCTTCATGAGGAGTGGGAGAAAGTTGTCCTACACCGAGACGTCAAGCCGAGCAACGTGCTGCTCGACAGTGACATGAATGCAAGGCTAGGTGACTTTGGTCTCTCAAGGTTGTACGACCATGGCACCGACCCACAAACCACACATATGGTTGGAACCATGGGATACCTGGCGCCGGAGTTCGTACGCACGGGCAAGGCGTCCGCTCTCACGGACGTGTTTGCATTCGGCATATTTCTCCTAGAGGTCACCTCTGGGCAGAGGCCTATCAAGCAGAACCCATTTGGCAACAAGCACACGTTGGTCGACTGGGTTATAGAGCGATGGCACAACGGATCGCTCATGGATACCGTGGATCAGAGGCTGCAGGGTCACTACGACGTCGATGATGCATCTTTGGTGCTGAAGCTAGGGCTTTTATGCTCGCACGCTTTTACTAGCGCAAGGCCGACAATGCGGCAAGTCATGCAGTACCTCGAAGGCGATACACCACTCCCAGAGCTAACACCAGCACATTTTAGCTTTACTATGCAGGTCTTGACGCAAAACAGAGGATTGGAATCAGCAAACTTGCAGTATCCTCAGTTATCGACGAGTTTTGCCACTTTTTCCGGCCTCTCGGGAGGAAGATAA
>HvleckRLK86
ATGGCCGAGATCACGCCGGCGGCCACCTATGCTGTCCTGCTCGTCTTGTGCGCTTGCTGCTACCTGCCTCCTCCTACTGCTTCCCTCTTCTTCAACTACCCCACTTTCAGCTCCCAAGATCAGAAGGACTTCAGCATCGAAGGGGACGCCTCCTTCAGCGTCGGACGGATCGACGTCAGCGCCAACAAGTTCGCCGGCGGCATCGGCAACAGCGCGGGCCGGGTGTCCTACAACGCCCAGCCGATGCTGCTCTGGGACAAGGTCACCGGCGAGGTGGCCAGCTTCACCACGCGTTTCTCCTTCGCCATCGTCATCCCCGACATCAACAACAAGGGGAAAGGCATGGCCTTCTTCCTCGCCGGCTACCCGTCGGTCCTGCCGTACGATTCCTACGGCTTCGACCTCGGCCTCACCAACCAGAGCACCAACGCCACGGCGTCGGGCGACAGCCGGTTCGTCGCCGTCGAGTTCGACACCTTCAACGATACCCAGGTATCCGACCCCGACGCCACCTATGACCACCTCGGCATCGACGTCAACTCCGTTCGATCCGTGGTGACCAAGTCCCTGCCGAGCTTCAGCCTCATGGGGAACATGACGGCTCTCATAGAGTACGACAACGTCTCCAGCCTTCTGTCTCTGACGCTATGGCTGGACGACGGCCGAGGCCCGAAGCACAGCCTTAACTCCAAGTTTGACCTCAAGAGCGCATTGCCGGAGCAAGTCGCCGTGGGCTTCTCCGCCGGGACGTCGTCGTCCGTAGAGCTACATCAGCTAACTTCATGGTACTTCAACTCGTCCTTGGAACCCAAGGCGGTGACCGTCGCCCCACCGGTTGCGGTAGCACCACCGTCCCCTGGCAGTGGCAGCGGCAGCCACAGCTCGGGAGTTATAGCGGGAGCAAGCGCCGGCGCGACGCTGTTCCTGGTGCTCGTCATCGTCACAGCAGTAGTCTTGATACGTCGTCGTGGGAGCGGCAAGAAGAAGCGAGAGGTCGAGGAGGATGACATGGGCTCGGACGACGAAGACGGCGATCCGGCGGTGGAGATTGAGATGGGGAGCACGGGGCCGAGGCGATTTCCGTACCAGGAGCTGGTGGATGCAACGAGGAACTTCGCGGCAGAGGAGAAACTCGGGCAAGGCGGCTTTGGCGCGGTGTACCGAGGCAACCTGAAAGAGCCTCGCCTCGCCGTGGCCATAAAGCGGTTCTCCAAGGATTCGTCGATGCAGGGGAAGAGGGAGTACACGTCAGAGATCAATGTGATAAGCAAGCTGCGGCACCGTAACCTGGTGCAGCTCGTGGGCTGGTGCCACGGCAGCAACGAGCTCCTGCTCGTCTACGAGCTCATGCCTAACCGCAGCCTGGACATCCATCTCCACGGCAAGGGCACCTTCCTGACATGGCCGATGAGGATGAAGATAGTAACTGGGCTGGGCTCGGCACTCCTCTACCTCCACGAGGAGTGGGAGCAATGCGTCGTGCACCGCGACATCAAGCCGAGCAACGTGATGCTGGACGAGTCCTTCGGCGCCAAGCTAGGAGACTTCGGGCTGGCGAGGTTCATCGACCACGCCGTCGGGACACAGACGATGACCGCCGTGTCGGGGACGCCGGGCTACGTGGATCCACAGTCCATGATCACCGGCAGGGCCAGCGCCGAGTCCGACGTGTATAGCTTCGGCGTCCTTCTGCTGGAGGTCGCGTGCGGAAGGCGGCCGGTGAGTCTGCTGCATGATCCTGCCGAGAAGAACGGGCTGTTCCGGCTGGTCGAGTGGGTCTGGGACCGGTATGGCCGGGGAGCCCTTCTCGACGGGGCCGACGAGCGGCTCAACGGCGACTACGATGGGGCGGAGGTGGAGCGCGTGATGGTCGCCGGGCTCTGGTGCGCGCACCCGGACCCGAGCGCGCGGCCGTCCATGAGAGCAGCCATGGCCGTGCTCCAGTCCAAGGATGCCAACCAGCTGCCGGTGCTCCCCGCCAGTATGCCCGTGCCGACGTACGGGCCGCTGGTGTCTTTGCCGAGCGGGCTATCTTCGTTCAGTGTGACACAGTCGACGTCGACGTCGACAAGCGGCTACGGCACACACACGTCTACTTCCTCCGACGTGAGCACCATCGGTTCAAAGGATTCGTCCTCGTTACTGAAACATCAGTATTCATAA
>HvleckRLK87
GCCCCACCCCACGCACACTCCCTGTCCTCCAGACCTCCACCAAGGGCAAAGGCTCACCCAACCCACTCCATGGGGATCTCCGTCGCCGTCCCCTCCCTCCTCCTCCTCTCCGCCGCCCTCCTCCTGCCGCCGGCAGCTGCGGGATTCTCCTTCACCTACAACTTCACCGCCGTCTCGGACTCGGCCCCATCGGGCATCTCCTTCCAGGGCGACGCCTTCTTCAACAAGTTCATCCGCCTCACCCGCGACGAGCGCGTCGGGCCCCTCACCAGCAGCGCCGGCCGGGCCTTCTTCTCCCGCCCCATCCCACTCTTTGACCCTGTCTCCCGCCGCCCCGCCTCGTTCGCCTCCGCCTTCTCCTTCTCCATCTCCGCCCCCGAACCCTCCGCCGCCTCCGGCGACGGCCTCGCCTTCTTCCTCTCCCCGTTCCCCTCAGTCCTCCCCAACAGATCCGCTGGCGGCCTTCTCGGGCTCTTCAACTCCTCCGCCCGCAACGGGGGTCGCTCCCTCGTCGCCGTCGAATTCGACACCTACAGGAACGATTGGGATCCCAGCGACGACCACGTCGGCATCGACCTCGGGGGCATCGCCTCCGTGGCCACCGCCGACTGGCCGACCAGCATGAAGGACGGCCGCACGGCGCACGCGCGCGTCGCGTACGACGCTGAGGCCAAGAACCTCACCGTGGCCCTCTCCTACGGCGACGCTCCCCCCACGGACGTCCTTCTGTGGTACGCCGTCGATTTGAGGGAACACCTGCCTGACTCCGTGGCCGTTGGCTTCTCCGCCGCCACTGGCGAGGCCGCCGAGCTGCACAAGGTCCTGTACTGGGATTTCACCTCCAGCGTCGACAGCAAAGAGCAGACGGTGATGCTGTGGGTGATATTGGGATTGTGCGGATTCCTTGTTGTGCTGGTCGGTGCAGGGGTTGTTTGGTTCGTCAAGGAATGGAGGAAGACAGGGGAATGTGTGCCCTATGTCGACATCGACGATGCAATGGGGTACGACGAGCTAACTGACGAGTTCATCGTGCAGAGCGGGCCAAGACGGTTCCGTTATGCTGAATTGGTGGCGGCAACCAACAATTTCTCCGAGCAGAGGAAGCTCGGGCAGGGCGGGTTCGGTGCTGTTTACCGGGGGTTCTTGAAGGAGCTCCGTCAGGAGGTGGCCATCAAGAGGGTCTCCAAGGGGTCGACGCAGGGGCGCAAGGAGTACGCAGCCGAGGTACGCATCATCAGCCAGCTGCGCCACCGGCATTTGGTCCGGCTTGTCGGGTGGTGCCATGAACACCGTGGTGACTTCTTGCTCGTCTATGAGCTCATGCCCAATGGCAGCGTCGACCAGCACCTCTACGGCAAAGGCGTGCACCTCACCTGGCCGACACGGTATGACATTGCACTGGGCCTCGCGTCGGCATTGCTCTACCTCCACGAGGAGTGCCTTCAGTGCATCGTGCACCGCGACATCAAGCCGAGCAATGTGATGCTGGATGCCACCTTCAGTGCCAAGCTCGGCGACTTTGGCCTTGCCAAGCTAGTTGAGCATGGCAGCCAGCCCTACACCACCGTCCTGGCTGGCACGTTAGGCTACTTGGCGCCAGAGTGCCTGACGACAGGCAAGGCAAGCCGGGAATCGGACGTGTACAGCTTCGGCGTCGTGGCACTGGAGATTGCTTGCGGACGACAGCCATCGGAGCCCACGGCGGAGCCGAGCAAGGCAAGGCTGGTGCCGTGGGTGTGGGAGCTTTATGGGAAGAAAGCCCTTCTCGAAGCGGCGGACTGGAGGTTGAAGGGGGAGTTTGACGAGAAGCAGATGGAGCATCTGATGGTGGTCGGACTATGGTGCGCTCATCCGGACTACACGCATAGGCCAAGCATCAGGCAGGCCCTGAATGCCCTGAAATTTGAGGCGCCATTGCCTGTGCTAGCGCCGAAGATGCCGGTGCCGACGTTCTTCCCTTTGCCTGACTTGGCTGCTCTGGTATCATCAGTTGGAGGTGCGCAGAACCCAGGCGTTACTGAGTGCGAGTCATCAGGGGCTAATGCTGGCCAACGGTCTTCGGTGAGGGATAGACTTCTGGAGCCATGA
>HvleckRLK88
ATGGCCGAGATCACGCCGGCGGCCACCTATGCTGTCCTGCTCGTCTTGTGCGCTTGCTGCTACCTGCCTCCTCCTACTGCTTCCCTCTTCTTCAACTACCCCACTTTCAGCTCCCAAGATCAGAAGGACTTCAGCATCGAAGGGGACGCCTCCTTCAGCGTCGGACGGATCGACGTCAGCGCCAACAAGTTCGCCGGCGGCATCGGCAACAGCGCGGGCCGGGTGTCCTACAACGCCCAGCCGATGCTGCTCTGGGACAAGGTCACCGGCGAGGTGGCCAGCTTCACCACGCGTTTCTCCTTCGCCATCGTCATCCCCGACATCAACAACAAGGGGAAAGGCATGGCCTTCTTCCTCGCCGGCTACCCGTCGGTCCTGCCGTACGATTCCTACGGCTTCGACCTCGGCCTCACCAACCAGAGCACCAACGCCACGGCGTCGGGCGACAGCCGGTTCGTCGCCGTCGAGTTCGACACCTTCAACGATACCCAGGTATCCGACCCCGACGCCACCTATGACCACCTCGGCATCGACGTCAACTCCGTTCGATCCGTGGTGACCAAGTCCCTGCCGAGCTTCAGCCTCATGGGGAACATGACGGCTCTCATAGAGTACGACAACGTCTCCAGCCTTCTGTCTCTGACGCTATGGCTGGACGACGGCCGAGGCCCGAAGCACAGCCTTAACTCCAAGTTTGACCTCAAGAGCGCATTGCCGGAGCAAGTCGCCGTGGGCTTCTCCGCCGGGACGTCGTCGTCCGTAGAGCTACATCAGCTAACTTCATGGTACTTCAACTCGTCCTTGGAACCCAAGGCGGTGACCGTCGCCCCACCGGTTGCGGTAGCACCACCGTCCCCTGGCAGTGGCAGCGGCAGCCACAGCTCGGGAGTTATAGCGGGAGCAAGCGCCGGCGCGACGCTGTTCCTGGTGCTCGTCATCGTCACAGCAGTAGTCTTGATACGTCGTCGTGGGAGCGGCAAGAAGAAGCGAGAGGTCGAGGAGGATGACATGGGCTCGGACGACGAAGACGGCGATCCGGCGGTGGAGATTGAGATGGGGAGCACGGGGCCGAGGCGATTTCCGTACCAGGAGCTGGTGGATGCAACGAGGAACTTCGCGGCAGAGGAGAAACTCGGGCAAGGCGGCTTTGGCGCGGTGTACCGAGGCAACCTGAAAGAGCCTCGCCTCGCCGTGGCCATAAAGCGGTTCTCCAAGGATTCGTCGATGCAGGGGAAGAGGGAGTACACGTCAGAGATCAATGTGATAAGCAAGCTGCGGCACCGTAACCTGGTGCAGCTCGTGGGCTGGTGCCACGGCAGCAACGAGCTCCTGCTCGTCTACGAGCTCATGCCTAACCGCAGCCTGGACATCCATCTCCACGGCAAGGGCACCTTCCTGACATGGCCGATGAGGATGAAGATAGTAACTGGGCTGGGCTCGGCACTCCTCTACCTCCACGAGGAGTGGGAGCAATGCGTCGTGCACCGCGACATCAAGCCGAGCAACGTGATGCTGGACGAGTCCTTCGGCGCCAAGCTAGGAGACTTCGGGCTGGCGAGGTTCATCGACCACGCCGTCGGGACACAGACGATGACCGCCGTGTCGGGGACGCCGGGCTACGTGGATCCACAGTCCATGATCACCGGCAGGGCCAGCGCCGAGTCCGACGTGTATAGCTTCGGCGTCCTTCTGCTGGAGGTCGCGTGCGGAAGGCGGCCGGTGAGTCTGCTGCATGATCCTGCCGAGAAGAACGGGCTGTTCCGGCTGGTCGAGTGGGTCTGGGACCGGTATGGCCGGGGAGCCCTTCTCGACGGGGCCGACGAGCGGCTCAACGGCGACTACGATGGGGCGGAGGTGGAGCGCGTGATGGTCGCCGGGCTCTGGTGCGCGCACCCGGACCCGAGCGCGCGGCCGTCCATGAGAGCAGCCATGGCCGTGCTCCAGTCCAAGGATGCCAACCAGCTGCCGGTGCTCCCCGCCAGTATGCCCGTGCCGACGTACGGGCCGCTGGTGTCTTTGCCGAGCGGGCTATCTTCGTTCAGTGTGACACAGTCGACGTCGACGTCGACAAGCGGCTACGGCACACACACGTCTACTTCCTCCGACGTGAGCACCATCGGTTCAAAGGATTCGTCCTCGTTACTGAAACATCAGTATTCATAA
>HvleckRLK89
ATGGTGGCATCCGGTGCTGCTCTGTGCCTCTCCGTTGTCCTGCTCCTCGCCGTTGTCTGCTGCCGCTCCGACGTCGACTTCACCTACCAGGGATTCCAGCACGCGCCCAACCTGAGCCTGGACGGGTCGGCGTCGGTGCTGCGCGGCGGCGCGCTCCAGCTCACCAACGACAGCGAGCGCCTCGTCGGCCACGCCTTCTACGGCTTCCCCGTGGCCCTGGGCGCGCTCGATGACAGCCACAGCGGCCTGCTCACGGTCTCCTCCTTCAGCACGGCCTTCGTCTTCGACATCGTGACCGTCGGGACGGGCGGCGGCCACGGGCTGGCCTTCGTGGTGGCCCCGTCCAGGGCGCTCCCGGGCGCGTCGCCCGAGATCTACCTCGGCGTCCTCGGGCCGACCACCAACGGCAAGGCCTCGAACCACGTCTTCGCCGTCGAGTTCGACACGGTCACCGACCTGGAGATGAATGAGACCAACGGCAACCACGTCGGCGTCGACGTCAACAGCCTCGTCTCGAACGTGTCCGAGCAGGCCGCGTACTACACCGCCGAGGACAACAAGGTGCCTGTGAAGCTGGAGAGCGCGCAGCAGATCCAGGCGTGGATAGACTACGACGGCGGTACCAGCTTGCTCAACGTGACCGTCGCCCCGGTGTCCGTCACTGACCGGCCGCAGCGGCCGCTCATATCGACAAAGCTTGACCTCCGGTCGGTCTTCAAGGAGAACATGTACGTCGGCTTCTCTTCGGCGACCGGGAAGCTCGCGAGCTCGCACTACATCCTAGCATGGAGTTTCCGGACCAATGGGCTCGCCCAGCCCATTGATCTCCGGCGGCTGCCAAAGGTCCCAAGACAGACAACGCCGGCTCCCAAGGTCCTCATCATCAAATTCGCCGCCGTGGCTTGTGCAGGAACACTCACCTTCGTCGCCGCAGCGATGGTTACTGCGCTGTGGCTCCGGCGTAGGGCGGCGCTGGCCGACAAGCTGGAGGACTGGGAGCTCGAGCACCCCCAGAGGATTCCATACATCGAGCTCTACAAGGCGACCAAGGGGTTCAAGGAGAGCGGGCTTCTCGGGTCGGGTGGTTTCGGCCACGTGTACAAAGGTGTGCTCGGACGTCGTCGGTCCGGCGAGGAGGTGGCCATCAAGCGGATCTCCAGCGGCACCAAGCAAGGGATGAGGGAGTTCGTGGCGGAGGTCTCGAGCCTCGGGCGGATGCACCACCGTAACCTGGTGGAGCTGCGCGGGTGGTGCAAGCACGGCCAGGACCTGCTCCTCGTCTACGAGTTCATGCCCAACGGCAGCCTCGACGAGCACCTGTTCGGCGGGGTGAAGGTGCTCACGTGGGCACAGCGGTTCAGCGTCATCCGGGGCGTGGCGCGCGGCCTGCTCTACCTGCACGAGGAGTGGGAGCACGTGGTGGTGCACCGCGACGTGAAGGCCAACAACGTGCTGCTCGGCGCCGACATGGGCGCGCGGCTCGGCGACTTCGGCCTGGCGCGCCTCTACGAGCACGGCGCGACCGCGGGCACCACGCGCGTGGCCGGCACCCTGGGGTACATGGCCCCCGAGCTCACCGTCACCAGCCGCGCCACCACGGCAACCGACGTCTTCTCCTTCGGCGCGCTGCTGCTGGAGGTCGCGTGCGGGCGCCGGCCCGTCGAGCAAGGCGAGGAGGCGGACGTGATCTTGGTGCGGTGGGTCCGGGACTGCGGGCTAGAAGGCGACCTGCTTCGGGCCGTGGATCCGAGGCTGGACGGGTTGTACGACGCCGCGGAGGCGAAGCTGGTGCTGTGGCTGGGCATGGTGTGCAGCCAGGGCCGGCCTGAGGCGAGGCCCAGCATGAGGCAGGTCTGTCAGTTTCTCAACGGCGAGGAGGTGCTGCCGGAGGACGCGGTGCTCGTGTTCTCGGATCCCGACTCGTCCGTGTTGCTTGGGTCCGTGCTCTCCTCCATCACCTTCTCCTCCTCCTGTGGCACCATGTCGGTAGGCTCGCTGCAAGGCGGTCGGTGA
>HvleckRLK90
ATGCTCAAGACCCTACACGTAAGGTTCATGGCTAAGGTGATGAAGAGAGCCAAGTGCCCTCTCGTCCTCAGCTTCCCCTACCTGCTCCAGGTCATATGGTGGTGTTGCCTTCCCCAAGCCACCTCGCTTAGCTTCGACTACGACTTCTCCGTTCCCGGCGTGCTCGCCGGCGCCGACCTCAGGTACATGAACGACTCTGCCGCCCTCCAGGACCGGATCGAGCTGACCAACTACTCGAGGAGCTGGAGCACCGGCCGGGTGGCCTACGGGAAGGCCGTGCGTCTCTGGGACGAGAGCACTGGCAAGGTCGCGAGCTTCACCAGCAACTTCGCCTTTGCCATCACTCCCGCTACCAGCAACAGCGCGAGAGGTGATGGCATGGCCTTTTTCTTGGGGCCTTACCCGCCGAGCATGCCGACGGACGCCCGCGGCGGCCACCTCGCGCTGATCAACAACCGCGACAACCCGGCAAACAAAGATTCCCCACGAACCGTCGCCGTGGAGTTCGACGCGTTCAAGAACGCCGGCTGGGACCCTGATGGCACCAACTGCCACATCGGCGTCAACGTCAACGACATTAGGTCGGCGGAGACCACCGCGCTGCCGGACGGGTTCTTCAACGGGATCATGTCGGCGTCGGTCAGGTACGACGCCCAAGCGGCCACGCTCTCGGCCACCCTGAGGTTGGATGATCCGCCGGGGCAGAGTCCATACACCGTCAGCGCCAACGTCGACCTGCGGAACGTCGGTCTGCCGCAGGAAGCAGCGGTGGGATTCTCGGCCTCCATTGGGGACCTCGTCGAGAAGCATCAGATTCTTTCTTGGTCATTCCAGTCCTCTATGACCGATTCCAAGACAAAAGGCACAAGTCTGATAGCTGGGCTAGTATCCTCTGGTTTGCTCATATTGCTTGCCATAGCCGTATGGCTCGGCTACCGCCAATATGTGAAGAGGAAGGGCAAGAACATCCATGACAACATACCTGAAGATGCGGATGAGACCCCTCTTGATGACCAGGACATGGACAGCGAGTTGGAGAAAGGGACAGCACCACGGAGATTTAGTTACAGCGAGTTATGGCGGGCGACACGGGGATTCAGCGATGATGAGAAGCTCGGCGAGGGTGGGTTCGGGGCAGTGTACAGAGGTTTCTTGCATGACCGTGGGCTCCATGTTGCCATCAAGAGGGTGTCCAAGATGTCGAGTCAAGGAAGGAGGGAATATATCGCAGAAGTGACCACCATCGGCCGGCTGAGGCATCGCAACCTTGTTCAGCTCGTCGGATGGTGCCACAAAGCTGACGAGCTCCTACTCATCTACGAGCTCATGACCAACGGTAGCCTCGACGTTCATCTCTACAAATCCAGAGACATCCTAACATGGCCAATCAGGTACAAGATCACTCTTGGCATGGGGCATGCACTCATGTACCTGCACCAGGAGTGGGAGCAGTGCGTGGTGCATAGGGACATCAAGCCCAGCAACGTGATGCTCGACTCCTCCTTTGACGCCAGGTTGGGAGACTTCGGGCTGGCGCGCCTCGTCGACCACAGCCGCGGCGCGCACACGACGATGCTGGCCGGCACCAAGGGTTACATGGACCCTCAGTGCGCGGTGACCAGCAGGGCTAGCGCCGAGACCGACGTCTACAGCTTTGGGGTCGTCCTCCTCGAGATCGCCTGCGGCCGGAGGCCCGTCATCCAGGAGCTGGAGGACGAGAGCAGGATGGTGCTGGTCGAGTGGGTATGGGCTCTCTACGGGAGAGGCGCACTCCTCGACGCGGTGGACGCGCGGTTAGACGGCGAGTTCGATGCGCGTGAGATGGAGCGCACGCTGCTGGTGGGCCTCTGGTGCGTTCACCCGGACTACGGCTTCCGGCCGTCCATCCGGCAAGCCATGAGCGTGCTCCAGTTCGAGGCGCCCCTTCCAGAACTCCCCCCGGAGATGCCGGTGGCACTACTGTACGTGCTGCCGCACCCGCACGGACGCTACGGGTCGAGCTACACGTCGTCGTCAACAGCGACCAGCGCCAGCACCGGCCACCGCCGACAGCAGGAGTGCCATCCTGATGAGGCTGATAGCGTCGACAACGAATCAGACCCCCGGCAGGACCGAGCATGTTCAGTCCACGCCGCGCAACTCTCCTAG
>HvleckRLK91
AAGAAACAGCAGCAACATCGGCTGACCAGCCCCGCCTCCAATGCAATGCCTCTCATCTCAGCTGCCTTCCTCCTCCTCCTCCTCGCCACCCTCGCCGCCTCCCAAGAATTCACCTACACCGGCTTCGGCGCTGGTCGCAACGGCGGCGCCCCGAACCTCACTCTGAACGGCGTCACGGAGCTCCAGCCGGACGGCATCATGCGCCTCACCAACGACACCTCCCGGCTCAAGGGCCACGCCTTCTACCCGTCCCCGCTCCGCCTCCTCGGCCCGCCCGGCTCCGGCAAGAGTAACGCCACCGCGGCAGCGGCGTCTTTCTCCACGGCGTTCGCGTTCGCCGTCGTGCCCGAGTACCCCAGGCTCGGCGGCCACGGCTTCGCCTTCGTGGTCGCCCCCGACCCGCGCCTCCCGGGGGCGCTGCCCAGCCAGTACCTGGGTCTGGTCAGCGCCGACGACGACGGCAACGCCACCAACCACGTGTTCGCCGTCGAGTTCGACACGGTGCAGGACTTCGAGTTCGGCGACATCAACGACAACCACGTCGGCGTCGACCTCAACAGCCTCACCTCCAACGCGTCCGCGTCCGCGGCGCCCATCAACCTCAAGTCCGGAGACACCGTCCTCGCCTGGGTCGACTACGATGGGGACCGGAGGCTCCTCAACGTCACTATCGCCACCTTGGCGGCGCCCAAGAAGCCGGCGTCACCGCTCATATCCTTCCATGTCGACCTGTCCGTCGTCTTCCGGGAGCAGATGTATGTCGGCTTCTCGGCGTCCACGGGGCTCCTTGCGAGCTCGCACTACCTCATGGGGTGGAGCTTCAAGTTGGGCGGCGGCGCCGCGCCGCCGCTCGACCCGTCGTCCCTCCCAACGCTGCCGAGGCCCAAGCCAGCCAAGAAGAGCAGGACGTCCCTGATCCTCGCGTCGGTGTTCTCGGCGTTTGTGGCGCTCTTGGTGCTCGCCGGCGCGGGCGCCTACGTTGCGTATCGCATCAAGAACCGCGAGGTCATCGAGCCGTGGGAGCTCGACCACGGCCCGCACCGGTACAAGTACCCGGAGCTGAAGCGCGCCACGCGAGGGTTCCGCGACCGCGAGCTCCTCGGCTGCGGCGGCTTCGGCAAGGTGTACCGCGGCGTGCTCCCTGGCACGCCCCCCACCGCGGTCGCCGTGAAGCGCGTGTCCCACGATTCCCGGCAGGGCCTCCGGGAGTTCGTCGCCGAGATCGCGTCCATCGGCCGGCTCCGCCACCGCAACCTCGTGCAGCTCCAAGGCTGGTGCCGCCGCCGCGGCGACCTCCTCCTGGTCTACGACTTCATGCCCAACGGCAGCCTGGACATGCACCTCTTCGGCGACGGCCTCCGGGCGGCGCGGCTGACGTGGGGCGTCCGGTACAAGATCCTCCGGAACGTGGCGTCGGCGCTGCTGTACCTGCACGAGGAGTGGGAGCACGTGGTGCTCCACCGCGACGTGAAGGCAAGCAACGTGCTCCTCGACGGCGACATGGCGGGGCGGCTCGGCGACTTCGGGCTGGCCAAGCTGTACGAGCACGGCGCGAACCCGGCCACGACGCGGGTGGTGGGCACCCTGGGGTACCTGGCGCCGGAGCTGACGCGGACGGGGAAGGCCACGACGGCGGCAGATGTGTTTGCGTTCGGGGCACTGGTGCTGGAGGTGGTCGCCGGGCGGCGTCCCATCGAGCCGCGGGCGGCACCGGAGGAGCTCGTGCTGGTGGAGTGGGCGTGGGAGCGGTACGCGGCGGGGGAGGTGGAGAAGGTGGTGGATGCGAGGCTGGGCGGGTCGTTCGACGCCGAGGAGGCGGCCGTGGCGGTGAAACTGGGGCTGTGGTGCTCGCACCCGGTGCCGGTGGCGAGGCCGACGATGAGGGAGGTGGCGAGGTACCTGGACAGCGGGGACGCCACGGAGGTGCCGCCGCCGCCGCCACCGCCGCCGCCACCGCCACCGCCGGTGTGCTCCGGCGAGGTTGGGTACGACGACTTCGTGCACTCGTTCCCGTCGTCGTCGTTCGAGAGGGCGGCGGCTGCCGGTGGAGGGGACCCGCTGTCGCAGACATCGGTGGCCACGTTCCCCTTCTCGCCGCTGTCCATGCGGTCATCCCACGTCAGTGTATGA
>HvleckRLK92
ATGGCCGGCATGGAGAGCCCGTGGCGCCCCCTTCTCGCGGCTCTCCTCCTAGTGTGTTTCGGCGCCGCCGTTCTGGGCGACGGAGATGGCGAGCAGTTCGTCTACTCCGGCTTCGCCGGCGCGAACGCCACCCTGGCCCTGGACGGCACGGCCGTCGTCCAGCCGAGCGGGCTCCTGGAGCTGACCAACGGCACGGCCCAGCTCACGGGCCACGCGGTTCACCGGATGCCGCTGCGCCTGCGGAGGTCGCCGGGCGACGGCGTGCGCTCCTTCTCGGCGTCCTTCGTGTTCGGCATCATTCCCCCGTACTCCGACCTCAGCGGTCACGGCATCGTCTTCTTCGTCGGGAAGGACAACTTCTCGGCCGCGCTGCCGAGCCAGCACCTGGGCCTCCTCAACAGCTTCAACAACGGCAACGCCACCAACCACATCTTCGGCGTCGAGCTGGACACCATCCTGAACAAGGAGTTCAACGACCCCAACGACAACCACGTCGGCATCGATGTCAACAGCCTCGAGTCCGTCGTAGCGCGCCCCGCCGCCTACTACGACGAGAAGAGCGGCGCGTTCCACGATCTGCTTCTGATCAGCGGCAAGGCGATGCAGGTCTGGGTGGACTACGAGAGCGAGTCCACGCAGATCAACGTGTTCCTGGCGCCCCTGAAGAATGGCGCCAAACCTTCGACGCCCCTGGTGTCAGCCAAGAGGAACCTCTCGGAGGTGCTCGTGGAGCCGGCGTACGCCGGCTTCTCGTCGTCGACGGGCACGGTCAGGTCGCGCCACTACCTTCTCGGCTGGAGCTTCGCCATGGACGGCCCCGCACCTCCCATCGACATAGGCAGCCTGCCGAAGCTGCCGTTCGTGGGCGTCAGGCCGCGGTCGAGGGTGCTGGAAATCGTCCTGCCGATCGCCACCGCGGCGTTCGTCCTCGGCGTGGTCGGCGTGGTGATCCTGCTCGTCCGGCGGCGGTCCAGGTACGCGGAGGTGCGGGAGGACTGGGAGGTGGAGTTCGGGCCGCACAGGTTCTCGTACAAGGACCTGTTCCGCGCCACGGAGGGGTTCAAGGGCAAGACCCTGCTGGGCTTCGGCGGCTTCGGGAGGGTGTACAAGGGGGTGCTCCCCAAGTCCAAGCTGGAGGTGGCGGTGAAGAAGGTGTCGCACGAGTCGAGGCAGGGCATCAAGGAGTTCGTGGCGGAGGTGGTGACCATCGGCCGGCTCCGGCACCGCAACCTAGTGCAGCTGCTCGGCTACTGCCGCCGGAAGGGGGAGCTCCTCCTGGTCTACGACTACATGTCCAACGGCAGCCTCGACAAGTACCTGTACGGCGGCAGCAAGGACAAGGAGAAGCCGGCGCTGGACTGGGCGCAGAGGTTCCGGATCATCAAGGGCGTGGCGTCGGGCCTGCTCTACATCCACGAGGACTTCGAGCAGGTCATCATCCACCGGGACATCAAGGCCAGCAACGTGCTCCTGGACGCCGACATGAACGGCCGGCTTGGCGACTTCGGCCTGGCGCGCCTGTACGACCACGGCGCCGACCCGCAGACGACACACGTGGTCGGCACCATGGGGTACCTGGCCCCGGAGCTGGCGCGCACGGGGAAGGCGTCCCCTCTCACCGACGTCTTCGCCTTCGGCGCCTTCATCCTGGAGGTGGCCTGCGGCCGGAGGCCCGTGGAGCAGGCCATGAACGACAGCCGCCTCATGCTCGTCGACTGGGTGCTCGAGCACTGGCAGAAGGAGACGCTCCTCGAGGTGGTCGACGCGAGGCTCGACGGCAACTACGACGCTGGCGAGGTCGTCCTGGCGCTCAAGCTGGGCTTGATGTGCTCGCATCCGATGCCCGGCGCGAGGCCGAGCATGCGGCAGGTCATGCAGTACCTCGAAGGCGACTTGCCGATCCCCGAATTGACGCCCACGCAGATGAGCTTCAGCATGCTGGCCCTGATGCAGAGCCAAGGGTTTGACTCGTTCGTCTTGTCTGCGGCGTCGGATCCATCGTCCGCCACGATGATGACCATGGGCACGATCACTGGACTCTCCGGAGGGAGATGA
>HvleckRLK93
CTTGGTCCAATAGTTCGGCGGAAGCGAGCCGCACACGCACATTATCATATCATGAAGCTTACGGTGCTCTTCGTCGTGTTGTTTAGTTTTCACCTCGCAGCCGGCGACGACGTCCAGGTCCAGTTTGCCTTCCCAGGCTTCGCCGGCGCCAACCTCACCGTCGACGGCAACGCCACGGTCACCCCCGACGGCCTCGTGGTGCTTAACAGCCGCAAGACCAACCTCAAAGGCCACGCGTTCTACCCCACCCCGCTGCGCTTCCGCGGGTCGCCGGGCGGGCAGGTGCACTCCTTCGCCTCCTCCTTCGTTTTCGCCATCGTCTCCGACTACACCGACTTCAGCGCCCACGGCATGGCCTTGGTCGTGTGCCCCACCCCGGAGAGCCTCTCCTCCGCGCTGCCTGCCGGCTACCTGGCCCTCCTCAACGTCCAGAACAACGGCAACGCAAGCAACCACCTCTTCGCGGTGGAGCTCGACACCACCCAGAACACCGACTTCAAGGACATCAACTCCAACCACGTCGGCATCGACGTCAACGATCTGCACTCCCTGCAGTCCCACCCTACGGGCTACTACCTCGACGGCAGCGGCGACTTCAGGAACCTGACTCTCTTCAGCAGGGAGGCGATGCAGGTGTGGGTGAGCTACGACGGCGGGACCGGGCAGATCGACGTGACACTGGCGCCCCTCGGAGTGGCCAAACCGGCGAGGCCGCTGGTATCAGATACCTACAACCTCTCCTCGGTGATCACGGAGCAGGCCTACATCGGCTTCTCGTCGTCGACGGGCGGGATCAACACGCGGCACTACGTGCTCGGCTGGAGCTTCGCCATGAACGGCCCTGCCCCGGCCATCGACATCGCCAAGCTACCCAAGCTGCCGCGCTTTGGACCCAAGCCTCGCTCCAAGGTCCTGGAGATCGTTCTGCCCATAGCCACGGCGGCGGTCGTCCTTGCTGTCTGCACGGTTGTCGCTCTACTCCTGCTGAGACATCTGAGGTACGCACAGCTGCTGGAAGACTGGGAGATCGAATTCGGGCCGCATCGATTCTCGTACAAGGAATTGTACCACGCCACCAAAGGATTCAAGAGCAAGCATCTACTTGGTGCCGGGGGTTTCGGAAAAGTCTACAAAGGTGTGCTCAGCAGGTCCAAGTTGGAGGTAGCCATAAAGAAGATCTCCCACGAGTCAAGGCAAGGGACGAGGGAGTTCATCGCCGAGGTGGTGAGCATCGGGCGGCTCCGGAACCCCAACCTCGTGCAGTTACTCGGCTACTGCAGGAGGAAAGGGGAGCTGCTTCTGGTGTACGAGTACATGCCAAATGGTAGCCTCGACAAGTACCTCTACGGCGAGTGTGAAGGGGTGCTTGACTGGGCCAAAAGGTTCCATGCCATCAAAGGGGTTGCCTCCGGCTTGCTCTACATCCACGAGAGGTGGGAGAAGGTGGTGATCCACCGAGACATCAAGGCCAGCAACGTGCTCCTCGACGGCGAGATGAACGGGCGCTTGGGGGACTTCGGGCTCGCAAGGCTGTACGACCACGGCACGGATCCGCATACCACGCATGTGGTCGGCACCATGGGCTACCTAGCCCCGGAGCTCGTGCGCACGGGGAAGGCGTCGACGCTCACGGACGTGTTCGCGTTCGGCGCCTTCCTTCTCGAGATTACCTGTGGGCGAAGGCCGGTGAGCAATGGTTCCCCGGGCATGGACACTGACAGCCACGAGATGCTAGTGGACTGGGTCCTTGATCATTTCCGCAGAGGATGTCTCGCCGAAACGGTGGACGCGAGGCTGGGAGGTGACTGTGATGTGGACGAGGCATGTCGGGTGTTGAAGCTCGGGCTGTTGTGCTCGCACCCGTTCGCCAGCACGAGGCCAAGCATGAGGCAGGTCATGCACTACCTTGACTCTGACACGCCGCTTCCGGACCTGTCATTGGCAGATATGACGAGCTTCAGTACGATGGCCCTGTTGCAGAACCAAGGGTTCGACTCGTATGCCATCTCTTATCCATCTTCAATGGGGAGCATTGGCACTGTATCTTACATCTCAGGTGGAAGATGA
>HvleckRLK94
ATGAAGCAGATACGTCTCCTCCTCCTACACCTCCTCTACGTTGGCCTGAGCCTCGCCGATGGAGATGACCAATTCGTGTACTCGGGCTTCGGCGGCACGAACCTCACGCTGGACGGCGTGGGGGTCACGGCGGACGGCATGCTGGAGCTGACAAACGGCACGCTCCAGCGCAAAGGCCACGCCTTCTACCCCGCGCCGCTGCGCTTCCGCAATGGCACGACGTCGACGTTCCGGTCCTTCTCCGCCTCCTTCGTCTTCGGCATCCTGTCCGACCACGTGGGCCTGAGCGCCCACGGCATGGCGTTCGTCGTCGCCGCCGGCCTCAACTTCTCTGACGCGCTGCCCAGCGGCTACCTGGGCCTCCTCAACGTCCAGAGCAACGGCAACGCGAGCAACCGCCTGGTCGCCGTCGAGCTGGACACCATGCAGAACGACGAGTTCGGTGACATCAACGACAACCACGTCGGCATCGACGTCAACAGCCTCAGCTCGGTGCAGTCCTACTACGCCGGCTACTACGACGACGGCAGCGTGAACGGCGACTTCCGAAACCTGACCTTGATCAGCGGCGAGGCCATGCAGGTGTTGGTGGAGTACGACGGGGAGGCCACCCAGATGAACGTGACCGTGGCTCCGCTCAACGTGGCCAAGCCTACGCGGCCACTCGTCTCGGCCAGGCACGACCTCTCCAAGGTGCTCACTGACGTGGCATACGTCGGCTTCTCCGCCGCCACCGGCGGCACGCTCCGATCGCGGCACTATGTGCTCGGATGGAGCTTCGGTCTGAACCGCCCGGCTCCGGCCATCGACATCAGCAAGCTACCAAGGCTTCCCCGTGTTGGTTCAAACGACAGGTCCAGAGCCCTCACGATCGCCCTCCCAATAGCAACGGCGACCTTCCTCCTCGCCGGTGCCGCGGCCATTTTCGTGCTCGTGCGAAGGCACCGGAGGTACGCCGAGCTGCTGGAAGAATGGGAGGTGGAGTTCGGGCCACACCGGTTCTCATACAAGGATCTGTTCCGCGCCACGGAAGGATTCAAGAGCGATCACCTGCTGGGCATAGGCGGGTTTGGGAGGGTGTACAAGGGTGTCCTCCCCTTGTCCAAATCGGAGATCGCCGTGAAGAGAGTGTCACACGATTCGAAGCAGGGCATGAAGGAGTTCATCGCCGAGGTGGTCAGCCTCGGCCGCCTCCAGCACCGCAACCTGGTGCAGCTGCTGGGATATTGCAGGCGCAAAGGTGAGCTCCTCCTAGTTTACGACAACATGTGCAATGGAAGCCTTGACAAGTACTTGCATGCCAGCGACGACCGCTTGTTGGTGCTGGACTGGGCTACGAGGTTCCGGATCATCAAAGGCATAGCCTCTGGCTTAGTCTACCTCCACCATGAGTGGGAGAAAGTGGTGATACATCGAGACATCAAGGCCAGCAATGTCCTCCTCGACAACGAGATGAAGGGTCGATTAGGGGACTTCGGCCTAGCGAGGCTCTACGACCATGGCGCCGGCGCCGACCCGCAAACTACCCGCGTGGTTGGCACGCTAGGGTACATAGCGCCGGAGCTAGGCCGCAACGGCAAGGCATCTCCCGGGACAGACGTATTTGCTTTCGGGGTGTTCATGCTGAGGTTACGTGTGGGCAGCGGCCTATCAGTCATGAAAGAACAGACGATCAGGCCTTGCTGGTTAATTGGGTGCTTCACCACTGGCAAAATGGGTCCATTTTGGACACGGTGGATGCTAGGCTCCACGGCAACTATGGTAAGGATGAGGCCAGTTTGGTGCTAA
>HvleckRLK95
ATGAAAGACTTACCTCCCACATGCCACTTGTTGAGTTTCAGCTTGCAAGTCACAAGCATGCTTGCAATGAAGCATACATCCTTCCTTCAGCAGTTCCTCCTCCTGTTTGGTCTTATCATCGCAACCTTGGCCTCTGGTGATGATCAATTCATTTTCTACGGCTTCAACCAATCGAGCCTAACCCTCGATGGCAGTGGTGTAGTCACAGAAAGTGGCCTTCTTGATCTATCCAATGGGAGGAGTGGTCTCAATGGCCATGCCTTCTACCCCACTCCTCTGCATTTCCGCAAGTCGCTGGGTGGTAAAGTCCAATCCTTCTCAGTCAATGTAGTTTTCAGCATCTTTATCATGTACCCAGACCTGAGCGCTGATGGCATGGCCTTCTTCATCGCCCCCACCAAGAATTTCTCTGATGCACGGGCAGCCAAGTATTTTGGTGTCCTCAACGAGAAGAACAATGGCAACACAAGCGAACACATATTCATGATCGAGCTAGACACCTATAAAAATGCTGAGATCCAAGACATCGACGACAACCATATCGGCATTAACATCAACAGTGCAGTCTCCTCGGAATCTACAACAGCTGGTTTTTATGAAGACGAGGGTGGTGCCTTCAATAACATGACGTTGAATGGAAACAAGGCTATGCAACTATGGGTAGACTATGACGAGGGTGATACTCAGATCAATGTGACCTTGGCTCCAATCAACATGGGCAAACCATCAAGGCCACTGCTCTCTGCAACCTATGATCTCTCAACTGTACTTTCTGACTCAGCTCAATACATTGGATTCTCATCCGTAGCTACTCCCATCAACACCCGTGATTATGTGATGGGTTGGAGCTTTGGCATGAATAGACCAGCTCCATCCATTGACATCTCCAAGCTTCCTAAGTTGCCTCTTGTTGGTCCCCAGGCCCAGTCCAAGCTCTTGGAGATCATCCTACCAGTAGCCACGGCAACATTGATCCTCTCTATGGGCACTCTTGTCACCCTAGTTATGCGAAGGCGAATCAAGTATGCTGAGGTGCGTGAGGATTGGGAGGGAGAGTTTGGTCCGCACCGATTCTCGTACAAGGATTTGTTCCATGCCACGGGAGGATTTAAGAACAAACACCTACTTGGAGAAGGAGGTTTTGGGAAAGTATATAAAGGGGTGCTTCCATTGTCTAATGTAGAGATTGCTGTGAAGAGAATGTCTCATGAATCAAGACAGGGGATGAAGGAGTTTGTCACTGAGGTTGTTAGTATCGGTCAACTCCGCCATCGCAACCTTGTGCAGCTACTTGGCTATTGCCGGAGAAAAGGTGAACTGTTTTTGGTTTACAATTACATGCCAAATGGTAGCCTCGATAAATACCTACACTCTGAAGTGCAGACAGCCATTTTGAACTGGGTTCAGAGGTTTCGAGTAATCAAAGGCATTGCTACCGGCTTGCTTTATCTCCATGAGAAATGGGAGAAGATAGTGATCCATAGAGACATCAAGGCAAGCAATGTACTCCTGGACAGTGAAATGAATGGGCGGCTTGGTGACTTTGGCCTTGCTAGGTTATATGATCATGGCACTGACCCACAGACCACACATATGGTTGGTACGAAGGGTACCTAG
>HvleckRLK96
TTCACCCGACGACTACTTCCCCACCCTGCCCCACGGGGACGGAGCGCGAACGCTCGATCGCTCCCGCTGCTCGCGCCGGTCGTCGCCATGCCGATCGACCTGGCCGCGTTAGTCTGGCTCCTCCTCTTCCTCGCTCTAGACGTCGCCGGTGCCCAAGAGTTCGTGTACGCCGGCTTCGCCGTCGGCAGCGTGGCGACCACCGGCGCGGCCGCCGTGCTCGCCCCCTCCGGCATCCTGCGGCTCACCAACGACACTAAGGAGGCGTTCGGCCACGGTTTCCACCAGGCGCCCCTCCGCTTCCGGGACGCCTCCACTGGCGCGCCCGTCTCCTTCTCCACCACCTTCGTCGTCGCCATCGCGCCACGGTACCCGGACGCGCACGGCCACGGCATCGCCTTCGCGCTCGCCCCCTCCGTCGCCGTCCCCGGTGCCGTTGCCGGCAAGTACCTAGGACTGTTCAACACGTCGGACAGCCTGGGGAACGGCACGAGCCTGATCGTCGCTGTCGAGCTGGATACCGCCATGGACGCTGAGTTCCATGACGCCGACGAAAACCACGTCGGCATCGACGTCAACGGCCTCCACTCTGTTAACTCAACCCCGGCCGGGTACTGGCACGACGACGGCTTCGGTGGAACTAAGTTCGACAACATCAGCCTGACTGGCGGTGGCGACGCGCCCCTGCAGGTGTGGATCGAGTACGACGGCGAGAGAGCGCGCCTCGAGGTGACGGTGTCGCCGGCGGGCGCGCCCAGACCGGCCGTTCCGCTCGTGTCATGCAACGTCAACCTCTCGAGGGCCGTGGCCGAAGACAGCTACGTCGGCTTCTCGGCCGCGAACGGCGCTGCCGCGAGCTCGCACTACGTCCTCGGCTGGAGCTTTCGCCTCGGCGGCGGCCGTGCCCAGGACCTCGACCTCTCCAAGCTCCCGCGGCTCCCGTCGTCCACATCATCATCATCATCCAAGAGAACGATGCCGCCGCTACTACTCCCGATGACGCTGCTCGTCCTGGTCGTCGTGATCCTGCTCCTGGCCTCCGCGGCCGTCGCGGCGCTCGTGGTGCGGCGGCGCCGGCAGTTCGCGGAGGAGGAAGAAGACTGGGAGGTAGAGTACGGCCCTCACAGGATCAGCTATAAAGACCTGCACGGCGCCACCAATGGCTTCCGCGACCTCATCGGCGCCGGAGGCTTCGGCCGCGTGTACCACGGCGTGCTCCGGAGGTCCGGCGCCGAGGTCGCCGTCAAGGTGGTCTCGCACGGGTCGCGGCAGGGGCTGCAGGAGTTCGTGTCGGAGATCGTGAGCATGAGCCGGCTGCGCCACCGCAACCTGGTGCAGCTCCTCCACTACTGCCGGCGGCGCGGGGAGCTGTTACTCGTCTACGACTACATGCCCAACGGCAGCCTGGACCAACACCTGTTCGGTCATCCATCATCGGAGCTGAGCTGGGAGCAGCGCGCCAAGGTCGTCCGGGGCGTGGCGGCCGGGCTGCTGTACCTGCACGAGGGGTGGGAGCAGGTGGTGGTGCACCGGGACATCAAGTCCGGCAACGTGCTCCTCGACGCCGACATGAACGGCAAGCTCAGCGACTTCGGGCTCGCGCGGCTCTACGACCACGGCGGCGACCCGCAGACGACGCGCGTGGTGGGCACGCTCGGGTACATCGCGCCGGAGATGAGCAAGACCGGCAAGGCCACCACGAGCTCCGACGTCTTCGCCTTCGGAGCCTTCCTGCTCGAGGTGGCGTGCGGCCGGAGGCCCGTGGTGTTCAGCAACGAGTCGGATGACTCGCCGCCATCGCCGGGGCTCGTGGAGCTCGTCCTGGAGCACTGGAAGGCCGGGAGGATCACGGAGGCAAGGGACCTGAGGATGGGCAAGTGCGACCAGGAAGATCTCGAGCTGGTCCTCAAGCTGGGGCTGCTCTGCTCTCACCCGGACCCGTTGCGACGGCCGGGCATGAGGCAGGTGGTGCAGATGCTGGAAGGCGCGGCACCGGCGCCGGAGACGTCGCCGGAGGATCTTGGGAACAGCATGACGCTGTTCGAGCACAGCGAGGCATTCGACGGGTTCGTCAGAGTGTCGTTCCCGTCGACGTCAGGGTTCACCACCGCCACGATAAGGACGTCCACGTCAAACTCCCCTGACGAGAAACGGCAGCTCCTCTTCAGCTGA
>HvleckRLK97
ATGCTTCTCCGGCGGCTGGCCGCGGTAATCTTCCTCCTCCTGTTCTCTCGGCATGTCGCCGGTGATCAGGAGTTCATGTACCCCGGCTTCGCCGCCGGCAGCGTGGCAACCGACGGCACGGCCGTGATCACCCCGTCCCGCATCCTCCAGCTCACCAACGACACCAAGGAGGTGTTCGGCCATGGTTTCCATCCAGCTCCCCTCCGATTCCGGGACGCCTCCACCGGCGCGCCCGTCTCCTTCTCCACCACCTTCGTGTTCGCCATCGCGCCGCGGTACCCGGACACGCACGGCCACGGTATCGCCTTCGCGCTCGCGCCGTCGGTCATCATCCCGGGCGCCGTCGCCGGCAAGTACCTCGGGCTGTTCAACACGTCAAACAGCCTGGGCGACGGCACGAGCCAGATCGTGGCCGTCGAGCTCGACACGGTCATGGACTTGGAGTTCCACGACGTCGACGAGAATCACGTCGGCGTCGACGTCAACAGCCTCCACTCCAACAGCTCGACCACGGCCGGGTACTGGCACGACGACGGCTTCGGCGGAAGGAGATTCGACAACATCAGCCTGATTGGCGGCAGCGACGCGCCTGTGCAGGTGTGGATCGAGTACGACGGCGGCAGCACGCGCCTCGAGGTGACGGTGTCGCCGGCGGGCGAGCCAAGGCCGGCCCGCCCGCTCTTGTCGTGCCACGTCAACCTCTCGTCGGCAGTGGCCGAAGACACTTACGTCGGCTTCTCGGCGGCGAACGGCGCCGCCATGAGCTCGCATTACGTTCTTGGCTGGAGTTTTCGCCTCGGCGGCGGCCGCGCACCGGACCTCGACCTCTCCAAGCTCCCGAGGCCCCCGTCGCCGCCGGGATCATCCAAGAGGAGGATGTCTCTTCCACTTATCCTGATACTGCTCCTCCTGTCCGTCCTGGTCCTGCTCCTGGTGTCGGCGGCCATCGCGACGTTCGTCGTGCGGCGGCAACGGTGGCACCGACAACGCCAGGAGTTCTCCGAGGAGGAGGAAGGCTGGGAGATGATAGACTACAGCCCACACAGGATCAGCTACAAGGACCTGCACGACGCCACCAATGGCTTCCGCGACGTCATCGGCGTGGGCGGCTTCGGCCGCGTGTACCACGGCGTGCTCCCGAGGTCCGGCGTCGAGGTCGCCGTCAAGAAGGTGTCCCACGGGTCGCAGCAGGGACTGCAGGAGTTCCTGTCGGAGATCACGAGCATGAGCCGGCTGCGCCACCGCAACCTGGTGCAGCTCCTCGGCTACTGCCGGCGGCGCGACGAGCTGGTGCTCGTCTACGACTACATGCCCAACGGCAGCCTGGACCAGCACCTGTTCGGAGTCGGACGCGCCGCGCCGGGGTTGAGCTGGGAGCAGCGCGCCAAGATCGTCCGGGGCGTGGCGGCCGGGCTGCTGTACCTGCACGAGGGGTGGGAGCAGGTGGTGGTGCACCGGGACATCAAGTCCGGCAACGTGCTGCTCGACGCCGACATGAACGGCAAGCTCAGCGACTTCGGCTTCGCGCGGCTCTACGACCACGGCGGCGACCCGCACGCGACGCACGTGGTCGGCACGCTCGGGTACATCGCGCCGGAGATGAGCAAGACCGGCATGGCCACCACGAGCTCCGACGTCTTCGCCTTCGGGGCCTTCCTGCTGGAGGTGGCGTGCGGCCGGAGGCCCGTGGTGTTCACGGTGGACCCTGATGGCGAGTCGCCGTCACCGGCAGGGATCGTCGAGCTCGTCCTCCAGCGCTGGAAGGCCGGGAAGATCACGGAGGCTCGGGACCCGAGGATCGGCGAGTGCGACGTGGACGACCTGGAGCTGGTCCTCAAGCTGGGGCTGCTCTGCTCGCACCCCGACCCGGAGCGCCGGCCGGGCATGAGGCAGGTGGTGCAGATGCTGGAACGCGCCGTGCCGGCGCCGGAGATGTCACCGGAGGACATCGGCAAGAGCATGAAGACTTTCGAGTACAACGAGGCGTTCGATGAGTTCGTCGGAATGTCGTTTCCATTGACGTCCGAGGTCACCACCGCCACGACGCTGCCATCCTCGTCGTCGCACTACTCCGACACTCCGCCGACAACAAACGGCAGCCGTCCTCATAGTGGCTTCCACTGA
>HvleckRLK98
ATGTATGCCACAACTTCTGCTTGGCTCGACCGTGAAACACGAAGTGAAGTGACAACCATGTCTGCCAACAAGCTTGCGCTCATACTCGTCGTGGGCCTCCTCATCAACCTTGTAGCCCGCACCGCCGGTGACGACGGCCACCAGTTCGTCTACTCCGGCTTCGCGGGCAGCAGCTTCCTCCTGGACGGCGCGGCGTCCGTCACGGGGAGCGGCCTCCTGGAGCTCACCAACGGCACGCTCCGCCTCAAAGGCCACGCCATCTACCGGACCCCGCTGCGCCTCCGCGGCCGCTCCTTCTCGTCCTCCTTCGTGTTCGGCATCCTGTCGGCCTACCCGGACGTGAGCGCCAACGGCATCGCGCTCTTCGTCGCCCCGACCACGAACTTGTCGGGCGCGATGGCGGCGCAGTACATCGGCCTCCTCAACAGCAGCAACAACGGCAACGCGACCAACCACGTCTTCGCGGTGGAGCTGGACACGATGCAGAACAACGAGTTCAGGGACCTCAGCGACAACCACGTCGGGATCGACGTCAACAGCCTCGTCTCGGTCAACTCCACCGACGCCGGCTACTACCCCGACGACGGCAACGGCGAGTTCCGCAACCTGACGCTCATCAGCCACGAGGCGATGCAGGTGTGGGTGGACTACGAGGGCGGGACCGGGAGGATCAACGTCACCTTGGCCCCCCTCAACCTCAAGACGGGCAGCAGGCCGGCGAGGCCGCTGCTCTCGGTGGTGCACGACCTCTCGGCGGTGATCCCCGACACGGCGTACATCGGATTCTCGTCCTCCACGGGCCTGGTCAGCTCGCGGCACTACATCCTCGGATGGAGCTTCGCCGTGGGCGGCCCCGCGCCCGCCATCGACGTGGCCAGGCTGCCGAAGCTGCCCCGCGATTTCCAAAAGCCAAGGTCCAAGGCCATGGAGGTCATCCTGCCGATAGCCACCGCCGCGCTGGTCCTTCTAACCGGGACGGCCCTGGTTCTCCTAAGAAGAAGGCAGCTGAGGTACAGTGAGCTGAGGGAGGATTGGGAGGTGGAGTTCGGCCCGCACCGCTTCTCCTACAAGGACCTCTTCCGCGCCACGGAAGGGTTCAAGAACAAGAACCTGCTGGGGGTAGGAGGGTTCGGGAAGGTGTACAGAGGAGCTCTTCCGGCGTCCAAATGCCAGATCGCCGTCAAGAGGGTGTCGCACAGCTCCAAGCAGGGCATGAAGGAGTTCGTCGCCGAGATCGTCAGCATAGGGCGGATGCAGCACCCGAACCTCGTTCAGTTACTCGGCTACTGCCGCCGGAAAGGTGAGCTGCTTCTGGTCTACGAGTACATGTCCAACGGGAGCCTTGACAAGTACCTGCATCCTCAACCTCAAGACGGAGACAAGCAAAATGGTGCTACTCTCAACTGGGCTCACAGGCTTGGTATCATCAAAGGGATTGCGTCCGGACTAATCTACCTCCACGAGGAGTGGGAGAAAGTTGTCGTCCATCGGGACATCAAGGCCAGCAATGTCTTGCTCGACGCCGGCATGAACGGCCGGCTAGGCGACTTCGGGCTCGCGATGCTGTATGATCACACCGCGGACCCGGAGACCTCGCACGTCGTTGGAACCATAGGGTACCTGGCCCCGGAGATCGGCCGCACCAGCAAGGCGACGATCCTCACCGACGTATTCGCCTTCGGCATATTCGTCCTGGAGGTCATCTGTGGGAAGAAGCCCATCATGCAAGATTCAAAGGATGATCAGCTCATGCTGGCAGACTGGGTGGTGGGGCACTGGAGCAGAGGGTCACTGGTTGAGGCGGTGGATACAAGGCTCCAAGGTGAGTACGACGATGATGAGGCGTGTGTGGTGCTCAAGGTGGGGCTGTTGTGCTCCCACCCATTCCCTGAAGCAAGGCCGGCTATGCGGCAAGTGTTGCAGTACCTGAATGGTGATATGCCGGTGCCGGAACTAGTGCCGGCGCACCTAAGCCTCCAGATGTTGGCGTTCATGCAGAATGAAGGTTTCGATTCGTACATCATGTCGTATCCTTCGTCGGTGGAGAGCGTTAACAGCTTCACTAGCCTTGTGCAACAGAGGCATGGGGAGGGGATCTCACCAGATGATGAGTTCGTGCCGGAGGAGGGGATACGATGA
>HvleckRLK99
ATGGCGATGATGCACATGTTCTTCCTCCTGATCCTCTTCCTCTCCGCTGGCGTCATCCTTCCACTTCCGCCCGTCGTCGCCGCTGCCGACGCCGACGGCGAGCAGTTCGTCTACACCGGCTTCACCGGCTCGAACCTCGTCCTCGACGGCGCGGCCACCATCACGGCGACCGGCCTGGTGGAGCTGACAAACGCCACCACCCACCAGAAGGGCCACGCGTTCCACCCGGCCCCCCTGCGGCTCCGCGGGTCACCGGACGGCACCGGCACGGTGCGGTCCTTCTCGGTCGCCTTCGTCTGCGGCATCGTCTCCAGCTACACCGACTTCAGCACCCACGGCCTGGCGCTCGTCATCGCGCCCGGCGTCAGGAGCCTGTCGGCCGGGCTCACGGACCAGTACTTCGGCGTCACCAACGCCCAGAACGACGGCAGCGCGGCCAACCACCTGTTCGCCGTCGAGCTGGACACCGTGCAGAACATCGAGTTCCGTGACATCAACAACAACCACGTCGGTGTCGACATCAACGGCCTTACCTCCGTGGTGTCCCACGAGGCTGGCTACTACGACGACCGTAACGGCGGCGGCTTCCAGAATGTAAGCCTCATCAGCCGTGCCGCGATGCAATTCTGGGTGGACTACGACAGGGTGACCACCCAGATCGATGTCACCATGGCTCCACTTTGGATGGCGAGACCCAGCAAGCCGTTGCTCAGCACCACCCAAAACCTGTCCACGGTGCTAGCAGTGGAGCCGTCGTACATCGGCTTCTCGTCGTCGACGGGACCGGTGAACACCCGGCACTACGTTCTTGGTTGGAGCTTGGGCATAGACGGACCTGCCCCGGCGATTGACGCCGCCAAGCTGCCAAAGCTGCCGCAGCTGGGGCCCAAGCCTCGCTCAAGAGTCCTGGAGATAACCCTGCCAATAGCAAGCGCCGTTGTCGTCCTCGCCGTCGGCATCGCCTTGGTTCTGCTTGTGAGAAGGCGGTTGAGGTACACGGAAGTGCGGGAAGATTGGGAGATGGAGTTCGGGCCGCACCGGTTCGCGTACAAAGATCTTTTCCAAGCCACCAAAGGGTTTAAGGACAAGCACCTGCTTGGTGCAGGAGGCTTCGGCATGGTGTACAAGGGGGTGCTTCCGGCATCCGGAGTAGAGATCGCCGTGAAGAAGGTCTCCCATGGATCCAAGCAAGGGGTGAAGGAGTTCGTCGCGGAGATTGTAAGTATTGGCCGCATCAAACACCGTAACCTCGTGCAGTTACTTGGCTATTGTCGGCGAAAAGATGAGCTCATTTTGGTGTACGATTACATGCCAAACGGTAGCCTGGACAAGTATCTATACGGCCATGGAGATGGAGATGGCATGACCTTGGATTGGGCTCAAAGGTTGCATGTCATCAAAGGGGTCGCTTGTGGCTTACACTACCTGCACGAGAGGTGGGAGAAAGTCGTCATCCACCGAGACGTCAAGACAAGCAATGTGCTCCTAGACAAGGAAATGAATGGACGGCTAGGTGATTTTGGGCTTGCAAAGTTATATGAGCATGGCACCAACCCACAAACAACACGTGTGGTTGGAACCACGGGGTATCTAGCACCGGAGTTAGTGCGAACAGGGAAAGCCACCCCTTTAACCGATGCTTTCGCCTTCGGAACTTTCATGCTTGAGGTAGCTTGCGGACGACGACCGATCAAGCAAGACAAGCAAGGCAACCAAATCTTGTTGGCGGACTGGGTACTTGACCACTTGCATAGAGAGTCACTCATCGAGGCAGCAGATCCAAGGTTGCAACACGAGTACAACTCTGATGAGGTGTGCCTAATTCTCAAGATTGGACTGTTGTGCTCACACCCATCTCCCTCTGCAAGGCCCATGATGCAACAAGTATTGCAGTATCTTGATGGCGAATTGCCACTCCCGGAGATGACACGCACAACTTTGAGCTTCAACTTGTTAGCTCTCAAGGAAAGAAAGGAGTTGCAATCCATGTCGAGCCCATTCTCATCGACGGCGATGACCGTCGGCACCATATCTGACCTCTCTGGCGGAAGATGA
>HvleckRLK100
ACATCCGCCGCGTCGGTTATATTAAGAGAAGAAAGCAGTAGTACGCCGGCGGAACACACCGGTTCCGCCGTAACGTACTACACAACCCTCTCACCTCTCATGTCTGTCATGAAGCTCATCTGCTTCTTCCTGCTCGGAGCTGTAGGAGCACTTGAGCTCGTATCCAGCGTGGACGACCAGTTTGTGTACTCCGGTTTCGCCGGCGCCGGCCTCACGTTGGACGGCTCGGCTACGGTCACGCCAAGCGGCCTCCTCGAGCTCACCAACGGCACGCTCCAGTTGAAAGGGCACGCCTTCCACCCGGCTCCGCTCCGCTTCCGTGAGCTACCCAACGGCACGGTGCGGTCCTTCTCCGCTTCATTCGTGTTCGGCATCCTCTCCGCCTACCCCGACATGAGCGCGCACGGCATCGTCTTCGTCGTCGCCCCCACCACGGATTTCTCGACCGCGCTGGCGAGCCAGTACCTGGGCCTGGTCAACGTCCAGAACAACGGCCACGAGAGCAACCGCATCTTCGCCGTCGAGCTCGACACCTTGCAGCAGGACGAGTTCCGTGACATCAACGACAACCATGTGGGCGTCGACATCAACGGCCTCATCTCGCTGCAATCCAGCAACGCCGGCTACTACGTCACCGGCGGCGAGAAAAAGGAGCGCTTCGAGAACTTGACGCTCATAAGCCACCAGGCGATGCAAGTGTGGATCGAGTACGACGCGGGGAGTAATCGGATCAACGTGACCTTGGCTCCGCTCGGCGTGGCCAAACCTGCCAAGCCGCTGATGTCGGTCACCTACAACTTATCTTCGGTAATCGCGAGCACCGCATACGTGGGGTTCTCGTCGGCGACGGGCTCATTCGACTCGCGACACTACGTGCTTGGCTGGAGTTTCCGCATGAGCAGCACTAGTGCTCCGGCCATGGACATGGCCAAGCTGCCGACGTTGCCCCGTGAGATCCCCAAGGCTCGGTCCAAGGTCCTACAGGTCGTCCTCCCAATTACTTCTGCAGCAGTCGTACTCGCTCTGGGCACCGTCATCGTTCTCCTGTTGCGTAGGCGACGAAGGTACACCGAGCTACGGGAAGATTGGGAGATCGAGTTCGGGCCGCACAGGTTTCCGTTCAAGGATCTGCACCGCGCCACCCAGGGATTTAACAGCAAGAACCTACTCGGCGTAGGGGGTTTCGGCCGAGTTTACAGAGGTGTTCTTCCAGATTGTAACATGGACATCGCAGTGAAGAGGGTGTCGCATGACTCCAAACAGGGCGTCAAGGAATTCATCGCAGAGGTTGTCAGCCTAGGACGCCTGCAACACCGCAACCTCGTGCGATTGCTCGGCTATTGCCGGCGCAAGGGGGAGCTCCTTCTGGTGTACGAGTACATGCCCAAGGGAAGCCTTGACAAGCACCTATATCTATATGGTCACCAGGACGACGACAAGCCAACTTTGAACTGGGCTCAGAGGTTTCACATCATCCAAGGGATTGCATCTGGCTTGCTCTACCTCCACGAGGAGTGGGAGAAGGTGGTGGTCCACCGCGACATCAAGGCAAGCAACGTGCTCCTGGACGACAAGATGAACGGGCGGTTGGGTGACTTTGGCCTGGCGAGGCTGTACGACCATGGCACCGACCCGCAAAGCACGCATGTGGTTGGCACCATAGGGTACATAGCTCCGGAGCTGGGGCGCACGAGCAAGGCAAGCCCCCTCACCGACGTGTTTGCCTTTGGGACCTTCCTTCTCGAGGTGACCTGCGGGCGAAGGCCCATCTTCCAAGACGCGCGTGGCAACCAGGTTATGCTGGTGGACTGGGTACTTGACCACTGGCGTAGAGACTCGCTCGCCCATGCAGTTGACACCAAGCTCCGAGGTGACTATAACGTTGACGAGGCATGCCTCGTGCTCCAGTTAGGCCTGTCATGCTCGCACCCGTTCGTCAACGCAAGACCCAACATGAGGCAAGTAATGCAATACCTCAGCAATGAGGTGCCACTGCCGCAGCTCAGGTCCACCAAAATGAGCTTTCAGACGCTTGCAATGATGCAGAACGATGGTTTTGACTCGTACATTCAGTCATCATATTCGTCTTCCAGGGCAAGCTTTTCCACGACTTCTGTCATCTCGTGA
>HvleckRLK101
ATGTCCTCCCTTGTACTCCTCCTGACGATCCCCTTGGGCCTGAACCTCGCAGCCTTGATCACCACCGCCAACGACCAATTCATCTACTCCGGATTCAGTGGCTCGAACCTCGCCGTCGACGACACCGCCACCGTCACGCCAGACGGGCTCCTGGAGCTGACAAACGGCACGGCGTACCAGAAAGGCCACGCGTTCCACCCGGCCCCGTTCCGCCTCCGCGACTCCACGGCCAGCGGCAATGGCAAGGTGCGGTCCTTCTCCGTCGCCTTCGTGTTCGGCATCGTCTCCGTCTACCCCGACTTCAGCGCCCACGGCATGGCCTTCGTCATGGCTCCGCGGAGGAACTTCTCCGATGCTCTTCCTGCCAAGTACCTGGGCCTCACCAACGTCCACAACGATGGCAACGCCAGCAACAACATCTTCGCCGTGGAGCTGGACACCATCCAGAGCGTGGAGTTCAAGGACATCAACGCCAACCACGTCGGCATCGACATCAACGGCCTGCAGTCCCTGCGGTCATACAACGCCGGCTACTACGATGACAAGAGCGGCGAGTTCCGAAGCATGAAACTCATCAGCCGCGAGGCCATGCAAGTGTGGATCGATTACCACGGGGAGAGGAAGGAGATCAACGTGACACTGGCCCCCTTCGACATGGCCAAGCCTGCTAGGCCGCTCCTCTCAGCCAGCTACGACCTCTCCACGGTGCTCACTGAGCTGGTGTATCTCGGGTTCTCAGCGGCGACAGGCCGTGTGAATTCGCGGCATTTCGTTCTTGGTTGGAGCTTGGGCGTGAGCACAGAAGCTCCGGCCATCGACATGGCCAAGCTGCCCAAGTTACCTCGGGTTGGCCCGAAGCCTCGGTCCAAGGTCTTCGACATCGTTCTACCAATAGTGACGGCAACATTTGTACTTGGGTTGGGTGGTATCATTATCCTGGTCATGCGGAGGAGATCAAGGTACACTGAGTTGCGGGAAGATTGGGAGGTCGAGTTCGGGCCACACCGCTTCTTGTACAAGGATTTATTCCGTGCAACCGAGGGATTTAAGGACAAGCATCTGCTTGGCGCAGGGGGGTTTGGAAGGGTATACAGAGGTGTGCTTGAGACATCTAAGCTGGAGGTTGCAGTGAAGAGGGTGTCCCACGAGTCAAGACAGGGGATGAGAGAGTTCATAGCTGAGATTACAAGCATCGGCCGCATCCGACATCGCAATCTTGTGGAGCTGCTCGGTTATTGCCGTCGAAAGGGTGAACTCCTTTTGGTGTACGCCTACATGCCCAACGGAAGCCTGGATAAACATCTATATAACACTAGGGAGGGCCAGCCTACTCTGAACTGGGCTCTCAGGTTTCAGATCGTCAATGATGTCGCGTCCGGCTTGCTTTACCTGCATCAGAGGTGGGAGAAAGTGGTCATCCACAGAGACATCAAGGCCAGCAACGTGCTCCTGGACAAAGACATGAACGGCCAGCTTGGTGACTTCGGGCTAGCGAGGCTGTACGACCATGGGGCAGACTCGCAAACCACGCACGTGGTCGGCACCATGGGCTACTTGGCTCCGGAGCTGATACGCACGGGCAGGGTGTCCCCTCTGACCGACATGTTCGCCTTCGGCATATTCCTTCTTGAGGTTGCATGCGGGCAGAAACCCATCAAGGAGAATGCGCAGGGCGGACAGATAGCGCTGGTGGACTGGGTGCTGGAGCATTGGCGTGATGGTACGCTCATGGAGACGGTGGACGCGAGGCTCCAGGGCGGGTTCGACATCCACCAAGCAGGGCTGGTGCTCACGCTAGGGCTCATGTGCTCACACCCTCTCGCTAGCGCGAGGCCTGCCATTGGACAGGTCATGCGCTATCTCGCAGGTGTTACGCCGCTCCCTGAGCTCACACCAACAGACGTGCTCACCTTGATGCAAAACAAGGGGTTTGACGAATCCGCCATGTCGTATCCGGATCTGGTGTCGAGCTTTGGCACAATTTCCACCCTCTCAGGAGGAAGATAA
>HvleckRLK102
ATGAGCGTCCTTCATCTGCTCCTTATCTTGGCTCTTCATGTCCTTCCCCTCGCATCTCCGGCGGTCGACGTCGACCAGTTCACGTTCGATAGCTTCGCCGGCGCGAACCTCTCGCTCGACGGCACGGCCATGGTCACCCCAGACGGGCTCCTGATGCTCACCAACGGCACGACTCAGCTAAAAGGACACGCCTTCTACCCTTCCCCAGTGCGGTTCCACGACGCCGCAAACGGCGACGCCTCCTCCTCGCGCTCCTTCTCGACAGCCTTTGTGTTCGGCATCCTCAGCGAGTACGACGACCTCAGCAGCCCCGGCCTGGCCTTCGTCGTTTCCAAGGGCAAAAACTTCTCCACGGCGCTCCAGAGCCAGTACATGGGCCTGGCCAACGCGGCCAACAACGGCAACGCCAGCAACCACTTCCTGGCCGTCGAGCTGGACACCATCGTCAACGCCGAGTTCGGGGACATGAGCGGCAACCACGTCGGGGTCGACGTCGACGGCCTCTCATCCATCGTCGCCGACAACGCGGGGTACTACGAGGACGGCACAGGCGCGTTCATCAACATGAGCCTGTTGAACCGCACGGCTGCGCAGGTGTGGGTGGACTTCGACGCCCGCACCTCTCTCGTTAGCGTCACCATGGCACCCCTTGAGTTGCCCAAGCCTAAGAAGCCCCTGCTCTCCGCCACCGTGAACCTCTCGTCGGTGATCCAGGACAAAGCCTACATTGGCTTCTCGTCATCCACCGGCGTCGTGTCGAGCCGCCACTACGTGCTTGCCTGGAGCTTCAAGATGGATGGTGGACAAGCCCCGCCGCTAAACATACAGAAGCTGCCGGCCCTGCCGTTCACGATCCCCAAGCGCCGGTCGAAGATGCTGTATATCTTATTGCCGATAGCATCGGCAGCGTTGGTGTTAGCACTGGCCATCGCCGTCGTCGTGATTGATCGGAGACGGCGCAGGTATGCGGAGCTGAAAGAGGACTGGGAGACGGAGTTCGGTCCGCACCGTTTCTCATACAAGGATTTGTTCCACGCCGCCAAGGGGTTCTCCGACGAGCGGCTGCTTGGCATCGGCGGATTCGGGAGGGTGTACAAGGGCGTGCTTCCGACGTCAGGGGCGGAGGTTGCAGTGAAGAAGGTGTCGCACGAGTCGAGGCAAGGGATGGAGGAGTTCATCTCTGAGGTGGTCAGCATCGGGCAGATCCGGCACCGGAACCTCGTCCGGTTACTCGGATACTGCCGGCGGAAGCGTGAGCTCCTGCTAGTCTACGAGTATATGCCAAATGGCAGCCTCGACAAGTTTCTGTATGACCACAACACGATGGTCTTGAGTTGGAGCCAACGGTTGGGGATCATCAACGACGTCGCATCCAGCGTCTTGTACCTCCACGAGGACTGGGAGCAGGTGGTTCTGCACCGCGACATCAAGGCGAGCAACGTGCTTCTGGACGCCGACATGAACGGGCGGCTAGGCGATTTTGGCCTCGCGAGGCTGTACGATCACGGGACCGACCCGCACACCACGCACGTGGTCGGCACCATGGGCTACCTAGCGCCGGAGCTCGGGCACACCGGCAGGGCCTCCAAAGCGTCCGACATCTTCGCCTTCGGCGTGTTCATGCTGGAGGTCGCGTGCGGGCGGCGACCCATCTCCATCTCCCAAGACGAGCACGGCGATCACCTCCTGCTGGCGGACAGCGTGATCGAGCACTGGCGCCAAGGAACGATCACCGACGCCGTGGACCCGCGGCTCCGAGGCGACTTCCCTGTGGAAGAAGCGAGATTCGTTCTGAAGCTGTGCTTGCTGTGTTCACACCCTCTGCCCAACGCGCGCCCGGGCATTCGGCAGATCATGCAGTTCCTGAGTGGTTACACGCGGCTCCCGGAGGTGTCGGTAGAGCACCTGAGTGTCGACGTGCTAGCGCTGAAGCAAAACCAGGTGGTTCGCTCGCATTCATCTTTGCCGTCAACGGAAGCTGGTAATATGTCTGATATTCCTGGAGCGAGGTAA
>HvleckRLK103
CCACTGACGACCCACCAACCCGCAGCCTCCTTATTTGTACAGATGCATGCACACCACGACTCCCTCCATTTCTCCACCACCTGGCCTGCCCACATCTCTCCTCTCTTCCTCAGTTCTCCTCCCCTCCTGAGAAAGCGAGGACTCAAACCCATGGCGCACTCCCGCCGCCGTCAACGCGCCACCACCAGCCTCGCCGTCCTCCTCCTGCTCTACGCCATCTCCGTATGCTCGCTCCTCCCCGCCGCCCGCGCCCAGGCCACCACCTTCACCAGCATCGTCGGCGGCAAGGAGTCCATCACCTTCTCCTTCCCCTCGTTCGACAACTCGCTGCGGCAGCTCCCCGGCAACCTCACCGTGCTGGGCAACGCCACCGTCAACGGGAATGCTCTGCAGATCACGCCGGACACCAGAAACGACCCGGAGAGGTTCCTCATCAACCAGACCGGCCGGGTCATGTTCCCCCGGGCCTACGTGCTCTGGGCCTCCGACGCGTCCAACTCCAGCGCCGACGGCCGGCGCGTCGCCTCCTTCTCCACCGTGTTCAAGGTCAACCTCTTCCGCGCGAACGCGTCCGTCAAGGGCGAAGGGTTGGCGTTCCTCATCGCGTCCGATGGCGCCGCCCCCCCGCCTCCCGGCAGCCACGGCGGCTACCTTGGCCTCACCAACGCGTCCACCGACGGTAGCGCCGCCAACGGGTTCGCGGCCGTGGAGCTGGACACAGTGAAGCAGGCCTACGACCCCGACGACAACCACGTCGGCCTCGACGTGAACGGCGTCCAGTCCAAGGTCGCCGCCTCCCTCACCCCCTTCGGCATCGACCTCGCGACCAACAACACCGACGACGACGGCAGCCACATGGTCTGGATCGAGTACAACGGCACGTCGCGGCACGTGTGGGTGTACATGGCCAAGAACGGGAGCAGGCCCGCCACTCCCGTGCTCAACGCGTCGCTGGACCTCTCGAGGGTCCTCCTCGGCAAGACGGCCTACTTCGGCTTCTCGGCGTCCACCGGCGTGCTGTACCAGCTCAACTGCTTGCACAGTTGGGACATGACGGTGGAGCTTCTCCCCGACGGCAGCGGCACCGGCAAGCAGCCGCTCTCCGGCTGGAAGCTCGGGCTGGCCATCGGCGCGCCGTGCGCCTTCGCCCTGGCGCTCGGTCTGTTCGCCGGCCTGTACATCAAGAGCAGGCGGAGGAGGATCGGGGACGACTCGAGCTCGATGGTCCGGAGCACCATTAACTTCGCCAGCATCCCCGGGGTGCCCAAGGAGTTCGACTACAAGGAGCTGAGGAAAGGGACGGGCAACTTCGACGAGAAGATGAAGCTGGGGCAGGGAGGGTACGGTGTGGTGTACCGCGCCACCGTGGTCGGGGAGCACGGGCAGAACATGGAGGTCGCCGTGAAACAGTTCTCCGGGGCCAACACCAAGGGACAGGAGGACTTCCTCGCCGAGCTTAGCATCATCAACCTCCTCCGCCACCGCAATCTCGTCAAGCTCCTCGGCTGGTGCCACCAGGACGGCGTGCTGCTGCTGGTGTACGACTTCATGCCCAACGGCAGCCTGGACAGGCACCTCTTCGGCGGGCCGGAGGCCCCGGTGCTCACCTGGGGCCAACGTTACAACATCGTCGCCGGCGTGGCCTCCGCCCTGAACTACCTCCACCACGAGTACGACCAGCGGGTGATCCACCGCGACATCAAGCCGTCCAACATCATGCTGGACGGCGCCTTCAACGCGCGTCTCGGCGACTTCGGCCTCGCCCGCGCGCTCGAGACCGACAAGACCTCCTACACCGACAAGATCGGCGTCCCGGGCACGCTGGGCTACATCGCGCCGGAGTGCTTCCACACGGGCAGGGCGACGCGGGAGTCGGACGTCTTCGGCTTCGGCGCCGTCATCCTGGAGATCGTCTCCGGCCGCCGCATCTCCTGCAGCAACGCCGCCGGGTGCAGCCAGCTGCTGGAGGGCGTGTGGCAGCTCCACGGCGCCGGCGGGGGCCGCATCCTCGAGGCCGTCGACAGGCGGCTCGTCGCCGGGGGGTTCGACGAGGGCGACGCGGAGCGGCTGCTGCTGCTGGGCCTCGCGTGCAGCCACCCGAACCCCGGGGAGCGGCCGAGGGCGCGCGCCATCGTGCAGATCCTGGCGCGCTCCGCGCCGCCGCCGGATGTGCCGGCGGCGAAGCCGGCCTTCATGTGGCCCGCGCTGCCGGTCGTGCTCGGGGACGACGACGGGGAGACGCCGGTGTCCGGGACCAGCACGGCGCTGACCTCCTCATCGTCGTACTACGCCTCGTCGGCGGGGTGGACGACGCAGAACTACCTGCTCACCAGGGAGCACGACGTGACGGACAGGGACATGTCCACGGCGTGA
>HvleckRLK104
TTTTTGAGTAGTTCCACCTTCCTAGCCACAAACAGCTTTCCGGCGATGACCAACATGAAGCGGGCGTCATTCCTTCCGCCCCTCCTCCTCCTCCCCCTATTTGGCCTCGCCGTCGCAACCTTTGCCGCCGGCGATGACCGATTCATCTTCTCCGGCTTCACGCAATCCAGCCTAGCCCTCGACGGCAGTGTCGTGGTCACTCAGGGCGGCCTCCTCGACATGTCCAACGGCACAAACAATGTCAAAAGCCACGCTCTTTACCCCGCTCCTTTGCACTTCCGCAATTCATCCGACGGTAAAGTGCAATCTTTCTCGGCGGCCATCGTCTTTTGTATCGTCGGCGCATACCCTGGCGTGAGCGCTAACGGCATGGCCTTCTTCATCGCTCCAAGCAAGAATTTCTCGGACGCGCTGCTGACGCAGTACTTTGGGATCTTGAAACCGAACAACAATGACAACCTCTTTGTCATTGAAATCGACACCTTCCAGAACCCCGACATCCAAGACATCAACGACAACCACATCGGCATCGACATCAACAGTGCTTTGTCCTTGCAATCCCACGCGGCTGGATTCTATGAGGACTCCAATGGTGCCTTCAAGAACCTGACGTTGAATGCCCAAATAGAGCTGCAGCTGTGGGTGGACTATGAGGAGGAAGGAACAAGGATCAATGTGACCTTGGCTCCACTTCATGTGGGAAAACCCTCGAGGCCATTGTTGTCTGCAACCTATGACCTCTCAACCGTGCTCACGGACACGGCGTATATTGGTTTCTCATCCACGGCTGAAATTATGAACACCCGTCATTATGTTCTTGGATGGAGCTTTGGCATGAACAGGCAAGCAGCTCCGTCCATTGACATCTCCAAGCTTCCAAAGGTGCCGCGTCTACGACAAAAGGCCCAGTCCAAGCTCTTGGCGATTATCCTCCCAATAGCCACTGCAGCACTGATCATCTCTATTGGCACCGTTGTCATTCTGACGGTGCGAAGGAGATGGAGGTATATGGAGGTGCGCGAGGATTGGGAGAGCGAGTTCGGTCCACACCGATTCTCATACAAGGATTTATTCCATGCTACTCAAGGATTTAAGAGCATGAACCTAGTTGGAGCAGGAGGGTTCGGAGAGGTATACAAAGGGGTGCTTAAATTGTCCAAGAAGGAGATCGCCGTCAAGAGAATGTCCCATGAGTCAAGACAAGGGATGAAGGAGTTCATCACCGAGGTTGTTAGCATCGGCAAGCTGCGGCATCGCAACCTAGTGCAGCTACTTGGTTATTGCAGGCGGAAAGGTGAACTGATGTTGGTGTATGACTACATGTCAAATGGTAGCCTCGACAGACTTATACACCATCAAGAAGACGGCAAGTCCACCTTAAATTGGGCTCAGAGGTTTCAGGTCATCAAGGGTATTGCTACCGGCTTGCTCTACCTCCACGAGAAGTGGGAGAAAGTCGTGGTCCACCGAGACATCAAGGCAAGCAACGTCCTCCTCGACGATGAAATGAACGGGCGGCTCGGGGACTTTGGCCTCGCGCGGTTATACGATCATGGCGCCGATCCACAGAGCACACACATGGTCGGCACGATGGGGTACCTTGCCCCCGAGCTAGTGCGCACGGGCAAGGCGTCCCCTCGCACCGACGTGTACGCCTTCGGCATGTTTCTTCTTGAAGTTACATGTGGGCAAAAACCTATGAAGCAAGATGCAGAGGGAAACCAGGTTTTCTTGGTGGACTGGGTCCTGGAGCACTGGAACAACCGAATGCTTAGCAAGACGGTGGACGCACGGCTCCAGGGTGACTACGGCGTTGACGAAGCGTGCCTCGTGCAGAAGATAGGACTTTTGTGCCTGCACCCGTTTCCTGGTTCAAGGCCTAGCATGCGGGAGGTCGTGCAGTACCTCGACGGCGAGACCCCGCTGCCGGAGCTGAAGACGACGCAGCTGAGCGTGGACATGCAGGGGTTGATGCAGGACAACGGGTTCAGCACCACCGTCATGTCTTATCCCCAGCTCATGTCCAGCTTCGGCGCAGTGTCCGACCTCTCTGGTGGACGATGA
>HvleckRLK105
ATGGACATGGGTAACCATCTTCTCCTCCTCCTCATCGTTGTCGTTAACCTCCATGCATTTATGCACACTGCCAACTGCGATGAACTCATCTTCAACGGCTTCTCCGAGGCAAATCTGAAGCTGAGTGGCCAAGCGTCTATGGTAGGCCGTGCTATAAGGCTCACTGGTGGCATCACCCTGACAGAAGGGGATGCTTTCTACAGCAGGCCCCTCGATTTCAGTAGCAACTCCAGTGGTGGTGGGACCTCCTTCTCGACAACCTTCGTGTTTGCCATCAATTCTGACACCATCGAAAACCCCTCGGGAGCTCCTGGAATGGCTTTCGTGCTCTCTTCCACCATGGAGCTGCAACATCTGCACAACAACTCAGTGGTTCAGGGCCAGCTGGGTTTCAGTGATGTAGGAGGTAACAGCTCCAACTCAGGTGACCAATTCTCCTTTACAATCGAGCTAACATACATCAATGACCACCTTGTTGAGATCGATGTTAAAAGCTTAGTCTCCGTTAACCATACCACCAGCTCCAACAGGGCTAGCAGGGCTAGCAACATGTTTGAAAGCACCAAACTTAGCAGCGCGAAACCGATGCAAGTGTGGATACACTATAATGGCACGGAGCAAATGCTAAATGTCACTTTAGAAGAATTCGATGATCATGTTGAACGGTCTAAACCGCTGAGCCTGCCACAGTTATCGTCCACTGTCAATTTCCCACCTTTGTTGTCAAACTCTGAGCATGTATATGCTGGGTTCTCTGCTGCAAATGGAAAAACATATTGCAGCCGATATGTTATTGGATGGAGTTTCATGAAAAATGGACAAGCACCACCACTAAACCCCTTGAATCTCCCTCAAGTCCTGCCAAATCCTCAGCATCAGAAAAAGCACATCCTACTCATAGTTTCCCTTGTCACTTTGGTTCCCATAGTCTTTGTCCTTGTGCTTATATTTTCCTACGATATCAGGTCGTGGTTGAAAACAAACCTTGCACATGAAAAATGGGAAATTGACTGTGGGATGTTGCAATCTTTCACATACAAAGATTTATTTATTGCCACCAGCGGGTTCAACAAAAAGGCGTTCCTAGGAAAAGGAGGATTTGGGAAGGTCTACAAGGGTGTGCTGGCTGTCCCTGAGCAGACTATTGCAATCAAGAGGGTCTCACCAGAATCAAAGCAGGGAATGAAAGAATTCATGGCTGAAATCGCAATTCTTGGTCACCTCCGCCACCGTAACCTTGTCCAACTAATTGGCTACTGCCGCCACAGGCAGGAGCTTCTTTTGGTCTATGACTATATGCCCAACGGTAGCCTTGATATGTATTTGCATAAAAAGGATAAGCCAACTCTGGACTGGGCTCAAAGGCTTCACATCATCAAAGGGGTCGCGGCTGGCCTTGTGTACTTGCATGATGACTGGGAGCAGGTTGTTATCCATCGAGATATCAAGGTGAGCAACGTGCTCCTTGATGATGGAATGAATGGAAGGCTAGGTGATTTTGGCCTTGCAAGGTTGCACGGACATGAAGCCGACGCCCATACCACGCGTGTGGCAGGCACCTGGGGTTACATTGCTCCTGAGCTGGCTAGGCTCGGGAAGGCGACCAAGGCAACAGACGTGTATGCATTTGGCATATTCCTGATGGAAGTTGCATGTGGAAGAGGGCCACTTGAGGCGAATGCCCATGGTGAACCTCTGGTGCTAGCAGACTGGGTGTTCAACAGATGGCAAACTGGTTCACTCATCGATGCCATGGACACGAGGTTAGAACAGGGCCATGTCACTGAAGAGGTAGAATTAGTGCTAAAACTTGGACTTCTATGCTCCCACTCGCTCCCCAAGGAAAGGCCATGCATGCGACTCGTAATGCAGTACCTGGAAAGCGACGCAACACTCCCAGATTTCCCCCCATGTTTTTTCACTGCTAATTCAAACAAGGATGAAGGATCTGAAGATCAGGTTGTGGCCCCTCCCTCAGCGGCAACATCTATTACAGGCCTTTCTGGAGGAAGATGA
>HvleckRLK106
ATGGCCGGAAGCATGAAGCTATCTACTCTGCCCATCCTCCTGCTCCTCATCACATGCCTTCCCAGCTCGGCCACCGGCAGCCAGGACCAAGAGAGCTTCCTCTACACCGGCTTCGCCGGCAGCAACATCACCCTCGACGGCGCGGCAACCATCACGCCGGCCGGCCTCGTCAAGCTCACCAACGAGTCGTTCCGGATCAAGGGCCACGCGTTCCACCCGGCGCCGGTGCGCTTCCGCGAGGCCCCCAACGGCACGGTGCGGTCCTTCTCCGTCTCCTTCGTCTTCGGCATCCTCTCCTCCTTCGGCGACATACGGGGCCACGGCTTCGCCTTCTTCATCGCCCCGACCACCGACCTCTCCGCCGCCTTCCCCATCCAGTTCCTGGGCCTCGTCAACGCCACCAACAACGGCAGCGCGACCAACCACCTCTTCGCCGTCGAGCTCGACACCATCCAGAACACCGAGTTCGGGGACATCGACAACAACCATGTCGGCATCGACATCAACAGCCTCAACTCGGTGGAGTCCAACACCGCCGGCTTCTACAACGACGATAGCAGCAGCAGGGAGGATGACGGCATGCTCACAAACATGTCCCTTATTGGGTCCGGGCCGATACAGGTTTGGGTGGAATACCATGGGGAATCCACACGAATCAACGTCACCTTAGCACCCCTCGGTGTCGCGAAACCGGCGAGGCCATTGCTCTCAACAGTCTATGACCTCTCAGGAGTGCTCACAGACCAAGCGTACCTTGGCTTCTCATCCTCCACTGGTTTAAGCACGGGGCATCACTATGTGCTTGGTTGGAGCTTTGGAATGGGCACCCCTGCTCCAGTCATAGATCCCACCAAACTACCCAAGCTGCCTTACCTTGGTCCAAGACCTCAATCCAAACTCCTAGAGATTGTTCTGCCGATTGCTTCTGCGGTCTTTGTGTTGGCTGTCGGCATCCTAGCTATCACCATGGTGAGGAGGCATATCAGGTATAAGGAGGTGCGTGAAGACTGGGAGGTCGAGTACGGCCCTCACCGATTCTCCTACAAGGATCTGTTTCGTGCCACCAAAGGGTTTAAGGACAAGAATCTGATCGGCGCAGGCGGGTTCGGGAGGGTGTACAAGGGGGTTCTTCCGAAATCTAAATCGCAGGTTGCTGTGAAGAGGGTGTCGTACGACTCGAAGCAGGGCGTGAAGGAATTCGTCGCCGAAGTCGTGAGCATCGGCCATCTTCAACACCGTAATGTCGTGCAGTTGCTTGGATATTGCAGGCGCAAAGGTGAGCTCCTCCTGGTCTATGACTACATGGAAAATGGAAGCCTCGACAACCACCTGTATGGCCAGTTACAAGGAAAGGCTACTTATTTGGGGTGGCGGCAAAGGTTCCGGATCATCAAGGAGATCGCCTTGGGCTTGCTCTACCTCCATGAAGACTGGGACAAAGTTGTCCTCCATCGGGACGTCAAGGCAAGCAACGTGCTTCTCGACAAAAACATGAATGGAAGGCTAGGAGATTTCGGCCTCGCGAGGTTGTACGACCATGGCACCGACCCGCAGACCACGCATGTCGTCGGCACCATAGGATACCTAGCTCCGGAGCTGGTACACAGAGGTAAAGCAACCACTCTCACCGATGTATTTGCCTTTGGCATCTTCGTTCTTGAGGTTACATGTGGGCAAAGGCCTATCAAGGAGGACCCGCAAGGCAACCAGCTCGTCCTGGTCGACTGGGTGCTTCAGAACTGGCACAAGGGGTCACTTGCTGATGTAGTGGATGCCAAGCTTCAAGGTGGCTATGACGCCGGTGAGGCATGCCTTGCGCTCAAGCTAGGGCTCTTGTGCTCGCACCCATTTCCTCAAGCAAGGCCCAGCATGCGGCAAGCTATGCAGTACCTCGACGGCGACGTGCCGCTCCCGGAGCTTCTGCCGGAACACTTCAGCTTCCACATGTTGGCCCTGATGAAGAATGAAAGCAAAGTTTACTCGTCCGCGATGCCGTCCTATCCTTCGCCGATGATGACGAGCTTTGGCTCAATATCAGACTTCTCAATACATGGGAGGTGA
>HvleckRLK107
ATGGAACATCCACCCACCCTTCGTTTCTCCTTACAACTTCAAATCTTTCTCTCCTTTGTCCTAAGCCTTGCATTCCTCACCACCACCACCACCACCATCACTCAGGGTCAGGAGGAGGAGGAGGACCAATTTGTCTACTCGGGCTTCTCCGGCGGTGGGGGTACCGGCCTCGGCCTCACCCTTGATGGCACAGCCACGGTTACACCAGATGGGGTTCTCAAGCTCACCAATGGCACTCTTCACCTCAAGGGTCATGCTTTCTACCCAACCCCATGCCGATTCCGCAAGTCGCCCAACGGGGCCGTGCAATCCTTCTCGGTCACCTTCGTGTTCTGCATGGTCCCCGTCTACTCGGATCAATGCACCGATGGCATGACTTTCCTGATCTCTCCCACCAAGGATTTCTCAGGTGCACAACACTCTCAATACTTGGGCCTCCTCAACAAAACAACCGATGGCAAGCCAAGCAACCAGATTTTTGCAGTCGAGCTTGATAGCAGCCAGAATACAGAGTTCGACGACATCGATGACAACCATGTCGGCATCGACATCAATAGCCTCACCTCCACCCAAGTCCGACCGGCTGGCTTCTATGATGACAAGAAGGGCGGTGCCTTCAACAACCTGACCCTCGTTAGCCGCAAAGAAATGCAGGTGTGGGTGGATTATGATGCAGATACCACAAAGATCACTGTGACCTTGGCTCCCCTCAAGGTAGCCAAACCGTCGAGGCCACTGGTCTCAACCACCTACAACCTCTCAACGGTGCTACGAGATAAGTCCTACCTCGGGTTCTCGGCTTCAACCGGTCCGATCAACTCACTGTACTGTGTGCTTGGGTGGAGCTTGGGCATAAACCGTGCTGCACCGGACATTGACATGACCAAGCTGCCAAAGCTGCCTCGGATTGGCCCCAAACCTCGGCCAAAAGCTATGGAGATCGTCCTACCAATAGCCAGCGCCACATTCATATTTCTTGTAGGAACAAGCATAGTCCTATTGGTGCGGAGGCGTAGGAAGTATGCCGAGCTACACGAAGATTGGGAGGACGAGTATGGGCCACACCGCTTCTCGTACAAGGATTTATTCCATGCTACTCAAGGGTTCCACAATAAGAACCTACTCGGTCATGGAGGATTCGGGAAGGTGTATAAGGGCGTGCTCCCGGTCTCTAAACTGGAGGTTGCGGTGAAGAGGGTGTCCCACGAGTCAAAGCAAGGAATAAAGGAGTTCATCGCCGAGATTGTGAGTATCGGCCGTATCCGCCACCGCAACATCGTCCAGTTACTTGGTTATTGTAGGAGAAAAGGTGAGCTCTTGTTGGTGTATGAGTATATGTCAAATGGCAGCCTTGACAGGTACTTGTACGTCCAAGAAGAAGAGGACGCGCCCACTCTAGATTGGGGTCGGAGGTTTGAAATCATCAAAGGCGTCGCGTCCGGCTTATTCTACCTTCATGAGAGGTGGGAGAAAGTCGTCGTCCACCGAGACATCAAAGCAAGCAATGTGCTTGTTGATGGTGAAATGAATGGGCGGCTAGGTGACTTTGGGCTTTCAAGGTTGTATGAGCATGGCACCGATCCGCAAACGACACGCGTGGTGGGCACCATGGGGTATTTCGCCCCGGAGCTAGCGCGCACCGGTAAGGCGACGCCTCTAACGGACGTTTACGCGTTCGGCATCTTCATCCTGGAGGTGACCTGCGGACGGAGGCCAATTGTTGACAAGGGTGTGGAAGAGGATGATGGTTCAGAGATACTGGTTGACTGGGTTGTGGAGCATTGCCGCAAAGGGTCGCTCATGGAGACAGTGGACATGAGGCTGCGAGGGAGCAGCAGCGACCCCGATGAGGTATGTTTGGCGTTGAAGATAGGATTGCTGTGTGCGCATCCGTTCGGTAATGTAAGGCCGAGCATGCGGCAAGTGATGAAGTACCTGGACGGCGAGACGCCGGTGCCGGAGCTGATGCCCACAACCTTGAGCTATAGCATGATGGGGGTGCTGCAGAATGATGGTTTCAGCGACTACGCATCACTGAGTGCCACGGTTAGCAGCANNNNNNNNNNNNNNNNNNNNNNNNNNNNNNNN
>HvleckRLK108
CTAGACACTTCCGATTCCCTTTCTCCCAAAGAGGAACCCAGATCATCAGTCAAGTGCCAAATTAAGAGACGGTGCGTTTGTTGCGGAACTGCAAGTCTCCAGCAAATTGATGCAGAAGCCATGCTTCTCGAGCATTTCCACTTGGCCACTCTATTCCTTCTCCTCGTGACCACCGCCGGCGGCGTCGGCGGGCAGAAGTTCACCTACAATGGCTTTGCAGGCAGCAACCTCGACCTCGACGGCGTGGCCGGGGTCACGCCCAACGGTCTCCTCATGCTCACCAACGGACCCATCCAGATGAAAGGCCACGCCTTCCACCCGTCGCCGTTGCCGTTCCGCGCGGCGCGGTCCTTCTCCACGACCTTCGTCTTCAGCATCTTCGGGCAGTACATCGACCTGAGCGCCCCCGGCCTGGCCTTCGTCGTCACCACGTCCAAGGAGATGCACGCCACCGCGTTGCCGGGCCAGTTCCTTGGCCTCCTCAACACCACCAACAACACCAACCCCAACGCCCACTTCTTCGCCGTGGAGCTCGACACCCTCCTCAACGTTGATTTCCGCGACATCAACAGCAACCACGTCGGCATCAACGTCGACAGCCTCGTGTCGCGAGCTGCCGCTGACGCCGGTTACTACGACGACGCCACGGGGCGGTTCCAGAACCTAAGCCTCATCAGCCGCAAGGCAATGCAGGTGTGGGTGGACTACGATGGAGCCGCCACGGAGATCACCGTCACCATGGCTCCCCTGGGCCTCGCCAGGCCCAGCAAGCCCCTGCTACGAACCACCGTGGACCTCTCGACCGTGCTACAGCACCAGGATACGGCGTACGTCGGCTTCTCGTCGGCCACGGCGGTGCTCTTCGCACGACACTTCATCGTCGGCTGGAGCTTCGCGCTGGACGGTCCAGCGCCTACGCTAGACATCTCGTCGTTGCCCGCCCTGCCGCCTACCGGGCCCAAGCCACGGTCCAGGGTGCTGGAGATCGTGCTGCCCATAGCATCAGCGACGGTGGTTCTTGCCGTCGGCATCGCTGTTTACATCTTCGTACGACGGCGCCTCAGGTACGCGGAGGTCCGGGAGGACTGGGAGTCCGCGTTCGGGCCGCAGCCCTTCTCCTACAAGGACCTGTACCAGGCGACCAAGGGGTTCAGCGACACCAACCTACTCGGGGCAGGAGGCTTTGGAAGCGTCTACAAGGGCGTGCTCCGCAAGCCGGACATGGACACCGAGGTGGCCGTGAAGAGGGTGTCGCACCAGTCAAGGCAGGGGATGAAGGAGTTCATAGCCGAGGTCGCGAGCATGCGCCGGCTCCACCACCGAAACCTGGTGCAGCTGCTCGGCTATTGCCGGCGAAAGGGAGAGCTTCTCTTGGTCTACGATCACATGCCGAACGGTAGCCTCGACAAATACCTACACGATCCCATGCCTGGCAAGGGCATGCTGGAGTGGGCTCAGAGGTTCCACATCATCAGGGGAGTGGCTTCGGGGTTATCGTACCTCCACGAGGATTGGGAGCAAATCGTCATCCATCGAGACGTCAAGGCAAGCAACGTGCTCTTGGATGGCGAGATGAACGGGAGGCTAGGGGATTTCGGCCTTGCAAGGTTGCACGACCATGGGTCCGATGCGCAGACCACACACGTGGTCGGCACCATGGGCTACCTAGCCCCTGAACTAGGCCACACAGGCAGGGCAACCCCATCTACCGATGTCTTTGCCTTTGGTGCGTTCCTCCTGGAGGTCACCTGTGGGCGGAGGCCCATCGAGCAAGATGAGAGAAACAACCGCGTCATGCTCGTGGACTGGGTTGCCGAACAATGGCGTAAGGGTTCGATCACTAAGGCCGCAGACGTTAGGATGCCAAACAGCTTTTGCCTTGACCAGGTCTCTCTAGTGCTGAAACTCGGAATTTTGTGCTGCCATCCGTTGCACAATGCAAGGCCAACCATGCGACAAGTCGTGCAATACCTCGACGGCGATTTGCCCCTCCCTGAGTTTTCGCCGGTGTATCTCGGCTCAACCATGCTGGAGCTGATGTACAGCGCAGAGTTTTTTAACAAGAATCTAATGACATATGTGTCATCGGGTGTCATTTCTGATCTCTCCACAGGAAGGTAA
>HvleckRLK109
ATGCCGGCCCTTCTTCTTCTCATACTACTCCTATTGTTGAGCCGGGACGGCGAGGTGGCCTCGTCGTCAGACGGTGGCCAGTTCTCATACCAAGGCTTCGCCGGCGCCAACCTTACCCTGGACGGCCTCGCCGTCGTCATGCCGAGCGGCCTGCTCGCGCTCACCAACTTCACGCAGCAGACAAAGGCCCACGCCTTCCACCCCGCCCCGCTCCGCTTCCTCAACAACAACAACACCGCCGTCTCCTTCTCAACATCCTTCGTGTTCGCCATCGTGTCGGGGTACGACGGTCTGAGCGACCACGGGTTCGCCTTTGTCGTCGCCCCGACCACCAACTTCACCACCGCGGGCGCCGGGCAGTACCTTGGCCTCCTCAACACCACCAACGGCACGCCCAGCGCCCCCATCTTGGCCGTCGAGCTGGACACCATCGTGAACCCTGAGTTCCAAGACATCAATAGCAACCACGTGGGCATCGACGTCAACAGCCTCGTGTCGCGGCAGGCCCGGCCGGCTGGCTACTACGACGACGACCGCGGCGGCGCCTTGCAGGGCCTGACACTTAACAGCCGCAAGCCCATGCAGGTGTGGGTGGATTACGACGGCCAGGCCAAGCAACTGGAGGTGACACTAGCCCCCGTGCATGTGCCAAAGCCAAGGAAGCCTCTCCTATCCGAAGCCATCGATCTCTCCACTCTCATGGCGGACGCCATGTACGTCGGCTTCTCGGCGTCGTCGGGAGTTGTCTCGGCGCACCACTACCTGCTCGGATGGAGCTTCAGCTTGGGCGGGTCTGCCCCGCCGCTTGATTTCTCCAAGCTTCCTGCCCTGCCACGCCTTGGTCCCAAGCCTCGCTCCAAGGTACTCGACATCGTGTTGCCGCTGGCCAGCGCGTTGCTCGTCGCAACGGCGCTGGCTGCGGTCTTCTTCTTTCTGTGGCGTCGGCGCCGGTTTGCGGAGGTGCGTGAAGGCTGGGAAGACGAGTTCGGCCCCCACCGATATGCATACAAGGACCTGCATCGTGCCACGCATGGGTTCACGGAGAGGAATTTACTGGGCGTCGGAGGGTTCGGGAGAGTGTACAAAGGTCGGCTTTCCGCATCCAATTTGGAGATCGCGGTGAAGAGGGTGTCGCACGAATCAAGGCAGGGACTGCGGGAGTTCGTTGCCGAGGTCGCCAGCATTGGCCGTCTCCGGCACCGGAATCTCGTGCAGTTACTAGGCTACTGCCGGCGCAAGGACGAGCTCCTCCTGGTTTATGACTACATGTCAAATGGCAGCCTTGACAAGCACTTGCACGATCCAAACATGCCAACCGTAACCTGGCCCGAAAGATTCTCGATCATCAAGGGGGTGGCATCGGGCGTGCTGTATCTCCACCAGGATTGGGAAAAGGTTGTCATCCACAGAGATATCAAGGCCAGCAATGTGCTCTTGGATGAAAACATGAATGGATGCCTTGGCGATTTTGGCCTAGCAAGGTTATACGATCATGGAACCGTTGCTCAAACAACCCGTGTCGTTGGCACCATGGGATACCTTGCACCAGAGCTTGTGCGTACCGGGAGGGCGACACCCTTAACCGACGTGTTTGCTTTCGGTGTGTTTCTTCTAGAGGTTGCATGTGGGCAACGACCGATCGAGCGTGCCCAGCGAGACAGCCGTGTAGTGATGATTGATTGGGTGCTTGAGCACCACCGCAGTGGATCTTTACTCCAGGCGGTGGATCCACGACTAGCAGGGAAGTTTGACACAGAGGAGGTTACCCTCGTGCTGCAACTAGGTTTGTTGTGCTCGCACCCATTGCCTGATGCAAGGCCTAGTATGCGGAAGGTTACGCAATACCTAGATCGTGGGCAATCTGTTCCTGACCTGTCACCGACGTACATGAGCTACAGTATGTTGGTGATGATGCAAAACGAGGGCTTCGATTCGTATGTTATGTCGTACGCTCCATCGGAGCCTAGCTGTACAACGGTGTCTTATGGGTCTTCGATGACGGTTCTCGCTGAGGGCAGATGA
>HvleckRLK110
ATGGAGCATCAATCCACCCTTGGTTTCTCTTTACAGTTACATATCCTTCTCTCCCTTGCCCTAAGCCTTGCATCCTTCACCACTGTCACCGCCACCAGTGAGGAGGAGGGCCAATTTGTCTACTCCGGCTTCTCCGGCAGTACTGACCTCACCCTTGATGGCACAGCCACGGTTACACCAGATGGGGTTCTCAAGCTGACCAACGGCACTGTTCACCTCAAGGGCCATGCCTTCTACCCAACTCCATGGCAATTCAGCAAGTCGCCCAATGGGGTGGTGCAGTCCTTCTCAATAATCTTCGTGTTCGGTATGGTCCCCGTCTACTCCGATCAATGTACTGATGGCATGACTTTCTTCATATCTCCCACCAAGGATTTCTCAGGTGCACAAACCTCTCAATACTTGGGCCTCCTCAACATAACAAACGATGGCAAATCAAGCAACCACATATTTGCAGTCGAGCTTGATAGTAGCCAAAATACAGAGTTCAAAGACATCGATGACAACCATGTTGGCATCAACATCAATAGTCTCACCTCCACTGAAGCCCGACCAGCTGGCTTCTATGATGACAAGAACAACGGTGTCTTCAACAGCTTGTCCCTCGTTAGCCGCAAGGAAATGCAAGTGTGGGTGGATTATGATGGAGATACCACACAGATCAATGTGACCTTGGCTCCCCTCAAGGTAGCCAAACCATTGATGCCACTGGTCTCAACTACCAAAAACCTCTCAACAGTGCTACAAGATCAGTCCTACGTCGGATTCTCGGCTTCAACTGGTCCAATCGACTCACTGTATTGTGTGCTTGGCTGGAGCTTGGGCATAAACCGTCCTGCTCCGGATATTGATATCACCAAGCTGCCAAAGCTACCTCGAATTGGCCCAAAACCCCAGTCCAAAGTTTTGGAGATCGTCCTACCAATAGCCACTGCCATATTCATCTTTCTTGTAGGAACAACTATAATTCTTTTGGTGCGTAGGCGAATGAGGTATGCCGAGCTACACGAAGATTGGGAGGATGAGTATGGGCCACACCGTTTCTCCTACAAGGATTTATTCCATGCTACTCAAGGATTTCACGATGCGAACCTACTTGGCCGTGGAGGGTTCGGGAAGGTGTATAAAGGTGTGCTTCCGGTGTCTAAACTGGAGGTTGCGGTGAAGAGGGTGTCCCACGAGTCAAAGCAAGGAATAAAGGAATTCATCGCCGAGATTGTTAGTATCGGCCGTATCCGCCACCGCAACATCGTCCAGTTACTCGGTTATTGTAGGAGAAAAGGTGAACTCCTATTGGTCTATGATTATATGTCAAATGGTAGTCTGGACAAGTACTTATATCTCCAAGAAGAGGAGGAACATAAACCCACTCTAGATTGGGCACGGAGATTTGAAATCATCAAAGGTGTTGCATCTGGCTTATTCTACCTTCATGAGAGGTGGGAGAAAGTTGTCATCCACCGAGATATCAAAGCAAGCAATGTGCTTCTTGATAGTGAAATGAATGGGCGCCTGGGTGATTTTGGCCTCTCAAGGTTGTATGACCATGGCACTGATCCACAAACAACACGAGTTGTCGGCACCATGGGATATTTCGCTCCAGAGCTAGCGCGCACCGGTAAGGCAACGCCTCTAACAGATGTGTATGCATTTGGCATTTTCATCCTCGAGGTAACTTGCGGACGAAGGCCTATTATTGACAGCAATCAGGCAGAGGAGGTTGGTTCAGACATATTAATTGACTGGGTTGTTGAGCATTGGAGCAAAGGCTCACTCGCGGACACGCTGGACATGAGGCTACAAGGCAGCAACTGCAATCTTGATGAGGTCTGTCTGGCGTTAAAGCTAGGATTGCTGTGTGCACATCCATTTGGCAATGTAAGGCCCAGTATGCGGCAAGTCATGCAATACCTCGACGGTGAGATGCTGCTCCCGGAGCTGATGCCCACAAACGTCAGTTATAGCATGATGGCCGTAATGCAGAATGACGGTTTCAGCCAGTACACATCATTGACTGACACAGTTAGCAGCAATGGAGTGACCTCCAGCCTTTCAACTGGAAGATGA
>HvleckRLK111
CAAAAGAAGATCGCCTCCCCGAAAAAAAAATATCACCAGCGCCTGCTCTTTGCTCCCTCGCCGACCGTTACGTTCAAACGCGCCAATCCGACCGTTACCCATAAAAAACACACCACAAACCCATCTCTTCCCGAACACTTGCTCTGCTCCCACTGTCCTGTCGGAATCCCCAAACTAATCGCTGCAATAATACTCCCACAAGCCACAAGAACTGCGCGCTCCACAAAATCTCATGATCCGAACACCGCGCGACCACCACCACCAATGGCCGCCGACCTACTCCTCCTCCGCCTCGTGCCGCTCCTCCTGCTGCTCCTAGCGGCGTCCCTGGTGCCGCCCGCCTCGTCGTCCGCGGGGAAGAACAGCTCCGTCAGCATCGACTCGGCCACGCTGTCCTTCTCCGACCTGACGCTGCTGGGTGACGCCTTCCTGCGGAACGGCTCCGTGGGGCTGACGCGGGACACGGGCGTGCCGTCCTCCAGCGCCGGCACCGTGCTCTGCACCCGCCCCGTCGCGCTCCGGGGCAACGGCAGCAGCAACAACGCCACCGCGTCCTTCGCCGCCAGATTCTCCTTCGTCGTCGCCAACCAGAACGCCGGCTCCACGGGCGGCGACGGCATCGCCTTCTTCATCTCCTCCGACCGCGCCACGCTCGGCGCCACCGGCGGCTACCTCGGCCTCTTCAACTCCTCGCTCGCCGACGCTGCCGTTCCGAATGACGACGACGCCGACGCCGTCGGCCCCGCCATCATCGCTGTGGAGTTCGACACCATGGTCAACTCCGAGCTCGGCGACCCGAGCGACAACCACGTCGGGCTGGACCTCGGCTCGCCGGTGTCCGTCAGCGCCGTCGACCTCGTTGACTCCGGGATCGTCCTCAAGAGCGGCAACCTCACCACCGCGTGGATCGATTACCGCGGGGCCGAACACCTCCTCGAGGTGTCGCTGAGCTACTCCGGTGTCAAGCCGAAGCGGGCCGTCTTCTCCGTGGCCGTCGACCTCTCGCCGTACCTCAGGGAGGCCATGTACGTCGGCTTCTCGGCCTCCACGGAGGGGAGCACCCAGCAGCACACCATCAAGGAATGGACCTTTCAGACCTTCGGGTTGCCGCCGGCGACCAACGCCTCCACCTTTACCAACGCCACGAGCAATGTCTCGGAGCCAGCAGTGCCCGGCGTGGCCGCCGCGAGCGGCGGCGCCACCAGCAAGAAAAGGTTTGGGCGCGCCATCACCATCCTCGGCCCCGTCGCGCTCGCCGTCGCGTTCGTGTTCTTCGCATGTGTCTCCGTCAAGAAGCTGGCAGAGCTCACCTCGAGGAAGGACGCCATCTTCCTGCCGGGGCTGCTCAAGGGGCCAAGGAAGTTCAGCCACAAGGAGCTGAGCGTGGCGACCAGAGGATTCCACGCGAGCAGAGTCATCGGCAGAGGCGCGTTCGGCACGGTGTACAAGGCGGCCATGCCGGGCGCGGCCACCACCTACGCAGTGAAGCGGTCGACGCAGGCGCACCAGAGCCGGAGCGAGTTCGTCGCCGAGCTCTCCGTCATCGCCTGCCTCCGCCACAAGAACCTGGTACAGCTGGAGGGCTGGTGCGACGAGAAGGGCGAGCTGCTGCTCGTCTACGAGTACATGCCCAACGGCAGCCTGGACAAGGCGCTGTACGGCGACCCCTGCACGCTCTCCTGGCCGGAGCGCCACAACGTGGCCGCCGGTATCGCGTCCGTGCTGTCCTACCTCCACCAGGAGTGCGAGCAGCGCGTGATCCACAGGGACATCAAGACGGGCAACATCCTGCTCGACGGTAACCTCAGCCCCCGGCTGGGCGACTTCGGGCTCGCCCGGCTCATGGACCACAACAAGAGCCCGGTGTCCACGCTCACCGCCGGCACCATGGGGTACCTCGCGCCGGAGTACCTGCAGTCCGGCAAGGCCACCGACCAGACCGACGTGTTCAGCTACGGCGTGGTGGTGCTGGAGGTGTGCTGCGGGAGGCGGCCGATCGACAGGGAGGAGACCGACAAGGATAGCAAGAACGTAAACCTGGTGGACTGGGTGTGGCGCCTGCACGGCGAGGACCGGCTCATCGAGGCCGCCGATGCGCGGCTGAACGGCGAGTTTGACAGGGAGGGGATGCTGCGGCTGCTGCTTGTCGGGCTAAGCTGCGCCAACCCCAACTGCGAGGAGCGGCCGGCGATGCGGCGGGTGGTGCAGATACTGAACCGCGAGGCCGACCCGGTGCCCGTGCCGCGGAAGAAGCCGCTCCTCGTGTTCAGCTCCAGCGCGTCCATCAAGCTGCAGGAGATGGCCTTCTCCTGTGGCGACGACGTCAGAGGAGGCTACCCGGCCGCCGCCACCACCACCGCTAACCCGGCGTCCCCGAGATCGGAGGGAGCCGGCATAGAAAGGTGA
>HvleckRLK112
ATGACTGCCGCAATCCAGTATGACAACATTTCAAGTATCATGTCTGTGACACTATGGCTTGGTGATGACCATGGCCCGAGTTACAGCCTTAGCTCCAAGGTTGATCTCAAGAGCGCATTGCCGGAGCTGGTTGCCGTTGGCTTCTCGGCGTCGACGGGCAAATCCTTTGAGCTGCATCAATTGCTTTCTTGGCACTTCAACTCATCGTTGCAGGGCAAGACAGCAACAGTAGTAGCGCCGCCGGTACTACCACCACCCTCCTCGAGAACTTCCAGTTCCGGAGTCGTAGCGGGAGCCGTTGCTGGGGCATCGCTGTTCCTGGTGGTGTTCTTCTCCATGTCAGCCATCTTGCTACGTCGTCGTCATAACAAGAAGAAGAGGGAGGCAAAGGAGGAAATGGACTCGGAAGACGAGATGATCATGGAGATGGAGTTCGGGACGGGGGCAAGGAGGTTCCCGTATCGGCAACTCACCAACGCGACAAGGAACTTTGCAGCGGAGGAGAAGCTCGGGCAAGGTGGCTTCGGTGCGGTGTACAGAGGCCACCTGAGAGAGCTTGGCCTCGACGTGGCCATAAAGCGATTCTCCAAGGAGTCATCCATGCAAGGGAGGAAGGAGTACATGTCGGAGATCAACGTGATCAGCCGGCTGCGCCACCGGAATCTGGTGCAGCTTGTCGGCTGGTGCCACAACCATGATGAGCTCCTGCTGGTTTACGAGCTCATGCCCAACCGTAGCCTCGACATCCATCTCCACGGCAAGGGCACCTTCTTGACATGGGCGATGAGGATGAAGATAGTCCTCGAGCTTGGCTCTGCGCTGCTCTACCTCCATGAGGAATGGGAGCAATGCGTGGTGCACCGGGACATCAAGCCCAGCAACGTGATGCTGGATGAGTCCTTCTGCGCCAAGCTAGGCGACTTCGGGCTCGCGAGGCTCATCGACCACTCCGTCGGGATGCAGACGATGACCATAGTTTCCGGTACGCCGGGCTACATGGACCCCCAGTGCCTGATCACCGGCCGCGCAAGCTCTGAGTCGGACGTGTACAGCTTCGGCGTGGTCCTGCTGGAGGTGGCATGCGGGAAGAGGCCGATGAGCACATCCGCTAACAAGCAGGGCGTCTCCCGGCTGACCGAATGGGTCTGGAACCTGTACGGCCAGGGAGGCGTTCTTGAGGCGGTCGACGAGCGGCTGAACGGCCACTACGACGAAGCGGAGGTGGAGCGTGTGATGGCTGTCGGGCTCTGGTGCGCGCACCCGGACCCGAGCGCGCGGCCGTCCATCAGGACGGCTATGGCCACGCTGCAGTCCAAGGATGCCAAACAGCCGCCCATGCTGCCGGCCAAGATGCCCGTGCCCACGTACGCTCCCCCGATGGCCCCGTGGGACGGGCAGTCGTCGTCTTCAGGGTTGTCGGCGTCCACCGTGACGCGGTCGTCAACGACGAGCGGCTACACGGGGCCAGCGCCAATGGTGACACCAAGGGCATGA
>HvleckRLK113
ATGAGATCGAGAGCCACGGGAACTTGCTTCATGGCTCTCCAGTTCGTCCTATTCTTCACTTTCAATATTGCCGGCGTCAGTCCTCTGTCCTTCAAGCTGAATTTCACCGAATCCAACTATACTGCGTCCACCGCAATCAAGTTCCAGGAGGACGCCTTCTACAACAAGGGGATCAAGCTCACCAAGGACCAGCTCAAAGACCAGATCACTAACAGTGTAGGCCGAGCAGTCTACACCGATCCAGTGCTTCTCTGGGATACCGCCACTGGCCAGTTAGCCGACTTCTCAACCCGTTTCACCTTCAGGATCACTGCCACAAACACAAGCGCAACCGACGATCCATACGGTGAGGGCCTAGCCTTCTTCCTCTCACCATACCCTTCTGTGGTTCCCAATAGGTCCACTGGTGGTTTTCTTGGCCTTTTCAGCAATGGGAGTGATCAGAATGACCCATCTAATGAGCTCGTGGCTGTTGAGTTCGACAGCCACGATGACACATGGGATCCAAAAGGCAACCATGTGGGCATTGACATCCATTCAATTGTATCCGTAGCCCACGTGGTGTGGAATAGTAGCATTAATGATGGTCGCATAGCCAATGCGTGGGTAAGTTACAAGGCCAGCTCCTTGACCTTGAGCGTCTTCTTGACGTACCTGGGGGATCCACAATTCAGTGGCAACTCCAGCTTATCTTATTCAGTTGATCTCAGAAAATACCTCCCAGGCAAAGTGGCCATTGGCTTCGCAGCTGCCACGGGTAGATTCGTTGAGCTCCATGAGATACTTTTCTGGGAATTCAATTCTACGGATTTGCAGCTGATGAAGACTGAGAAGATGAGAAGTGTACTGGTCATAAGCTTGGCTACTACCATAAGTGTCGTGGTCTGTTCTATGTGCTTGGTTTGGTGCCTTCTGCATTTTAGGACTAGAAGATCAAGAAATGAGAAACAAAAGAAGCTAGGGTATCATGAGTCCATTGATGGTGAATTTGAAAAAGGGAGCGGCCCAAGAAGATTTCGGTACAATGAACTTGTGGCTGCCACAAGGAACTTTGCTTTGGAGAGAAAGCTTGGAGAAGGAGGATTTGGCGCAGTCTATCAGGGCCTTTTGAAGGATCAAAACCTAGATGTTGCCATAAAGCGAGTGGCAAAAGGGTCTACACAGGGAAGGAAGGAGTACATATCTGAGGTCAAGATCATCAGCCGGCTGAGGCATCGCAACCTTGTGCAGCTTGAGGGCTGGTGTCATGAGCATGGAGAGTTTTTGCTTGTCTACGAGTTCATGCCAAACAGGAGCTTGGACACACACCTCTATGATAACAGTAACTTGCTAACATGGCCATTGAGGTTCAAGGTCACCGCAGGTGTTGCATCTGCCCTCCTGTACCTCCACGAGGAATGGGAACAATGTGTCATTCACCGTGATATCAAACCGAGCAATGTCATGCTTGATTCGGTATTCAATGCCAAGCTTGGTGATTTTGGGCTCGCGCGGCTCATTGACCACGACCGAGCCTCGCAAACTACAGTGTTAGCTGGGACAATGGGTTACATGGCTCCAGAGTGTGTCACCACTGGCAAGGCAAGCAAAGAATCTGATGTCTACAGCTTCGGAATTCTTGCACTGGAGATTGCATGCGGAAGGCGACCGGTTGTGCTAAAGGAAGACGATGACAAGGTTATATTGGTTCAGTGGGTATGGGATCTTTATGGAAGAAACAAGATTCTTAATGCAGTTGACAGCAGGCTTGACGGTGCATTTGAAGATAGAGATGCAGCATGCTTGATGGTTGTCGGACTGTGGTGTGCACATCCAGATTACAATCTTCGACCTTCGATTCGTCAGGTCATAAGTGTACTGAAGTTTGAAGCACCATTGCCAATCCTTCCCCCGAAGATGCCAGTGGCAATGTACTTTGCACCGCCAATTTCTCTGTGCAGGTTTTCATACACCTCATCTGATGGAACACTCAAGCAGCAGGAGCTGGAGAGGTCCAATGGTTATGGAAAAACAAGCTCATCCACTACAACCAATGCATCCAGTTCACCTCCTTCTGTGCGGTTGCCAGAGGTGGGCTACTAA
>HvleckRLK1
ATGGATGGGCCGGCTCTCAGCTGCTACACTGCGGCCCTGATCATTCTCTTCCTGCCGTTGCGGGCGTCGGAGGACCGGCTACTCGCTGGCGAGAGGCTCTCCCCCGGCACCACCATCGTCTCCGACAACGGTGCCTTTGCCTTGGGCTTCTTCAACCCCTCCAATTCAACTCCGGCTAGCCTTTACCTGGGCGTATGGTACAACGGCATACCAGAGCTCACTGTTGTGTGGGTCGCCAACAGGGAGGCGCCGGTGATCAACGGCAATTCCTCTGTGCCGACGCTCTCCCTCACCAACACCTCCAACCTCGTTCTCTCCGACGGTAGCAGCGGCCTTGTCGTTTGGACGAGTGATGTAGCCGCTGCTCCGAGCTCCGTTGCAGCAGTGGCGGTGCTTGAGAACACAGGCAATCTCGTCGTCCGGTCGCCGAATGGAACCACGTTGTGGCAGAGCTTTGAACACGTCACGGACACTTTCCTCCCCGAAATGAAGATCCGGATCAGGTATGCCACGCGCGGCACCGGTATCCGCTTGGTGTCCTGGAAGGGGCCCAGCGACCCATCGCCCGGGCGATTTTCCTACGGAGGAGACCCGGACACGCTCCTCCAGATATTCCTCTGGGATGGGGAACTCCCGCTGGTCCGGAGTGGCCCATGGACGGGGTACCTAGTGAAAGGCGAGCACCAATACCAGCAGGCTAATGGCAGCGGGTCCATCATCATCTACCTAGCCATTGTCGACAATGACGAGGAGATCTACATGACCTACACCGTCTCTGCGGGCGCTCCACTCACCAGGTATGTGGTGACCTACTTCGGAGATTACGAACTCCAGAGTTGGAACAGCAACTCTTCGACATGGTCTATCCTCTTCAAGTTGCCACCCTATGAATGCAACCGATATGGTTCCTGTGGTCCGTTTGGCTATTGCGACGAGACGGTGAGGCCCGTACCCATGTGCAAGTGCCTCGACGGCTTCGAACCAACAAGCGCAAATGAGTGGAGGTTCGGTAGGTACTCGGCAGGGTGTCGACGAAAGGAGGCATTGCACGGATGCGGTGACGGCTTCTTGGCCTTGACGGAGATGAGGGTGCCAGACAAGTTCACGTTTGCTGGTGGGAACAAGAGCAAAATGGAGGAGTGTGCGGCGGAGTGCAGCAACAATTGCTCCTGTGTGGCGTACGCATTCACCAACCTAAGCAGTGGCAGGTCTGGAGGAGATGTGACAAAGTGCTTAGTATGGGCGGGGGAGTTGATTGACACTGGGAAGTTGGGCCAAGGGATTGGCAGCACCACGCTATATCTCAGGCTTGCAGGCTTAGATGTAGCAGCTGGTAAAAGTAGAAAGAGTACTGCAACGATGATTATACTGGCAATTTTTGGAACTGGAGTTGTGGCATTCCTATGCATTTTCGTGGCATGGCTAAAATTCAAAGGCAAGAAAAAATGGAGAAAACACAAGAAGGCAACATTTGATGGTATGAATACCTCTTATGAACTTGGGGAAGGAAACCCTCCACATGCCCATGAATTTCCATTTGTAAGTTTTGAGGAAATTTCTCTAGCAACGAACAATTTCTCTGAGACATGTAAGATTGGACAGGGGGGATTTGGAAAAGTCTACAAGGGATTATTAGGTGGCCAAGAAGTTGCTATCAAGAGGCTAAGTAGTGACTCGCAGCAAGGAACAAAGGAATTCCGGAATGAAGTAATTCTAATTGCCAAATTACAACACAGAAACTTGGTTCGGCTTCTTGGATGTTGTGGGGAGGGAGATGAAAAGTTGTTGATCTATGAGTATCTTCCGAACAAAAGCTTAGATGCAACCCTTTTTGATGATTCACGAAGATTGATGTTGGATTGGACAACACGGTTTAATATAATCAAAGGGGTTGCAAGGGGACTTCTGTACCTCCACCAAGATTCAAGACTAACTATAATTCATAGGGATCTCAAAGCTGGAAATGTTTTGCTAGATGTGGAGATGAAACCCAAGATAGCAGACTTCGGTATGGCGAGGATCTTTGGTGATAACCAACAAAATGCCAACACCCAACGTGTTGTGGGAACATATGGATACATGGCCCCAGAGTATGCAATGGAAGGTGTCTTCTCTACCAAGTCCGACGTCTACAGCTTTGGTGTGCTAGTACTTGAGGTCGTGACTGGTATAAAAAGAAGCTCCAATAGTCAGATCATGGGCTTCCCCAGCCTCATTGTGTATTCATGGAATATGTGGAAGGAAGGAAAGACAGAGGAATTGGTGGACTCATATACCACGGATACTTGTTCACTGGATGAAATTTTGATTTGCATCCATGTAGCACTCCTGTGTGTCCAGGACAATCCAGATGACAGGCCACTCATGTCATCCGTTGTGTTCATCCTAGAAAACGGAAGCACCACACTTCCACCCCCCACTTGCCCTGCCTACTTTACACGACGAAGTGCAGAAATGGAGCAAATGAGAGATGATATCCAGAACTCCAGGACCAGTTTTACTCTCACCGAGATTGATGGGAGATGA
>HvleckRLK2
NNNNNNNNNNNNNNNNNNNNNNNNNNNNNNNNNNNNNNNNNNNNNNNNNNNNNNNNNNNNNNNNNNNNNNNNNNNNNNNNNNNNNNNNNNNNNNNNNNNNNNNNNNNNNNNNNNNNNNNNNNNNNNNNNNNNNNNNNNNNNNNNNNNNNNNNNNNNNNNNNNNNNNNNNNNNNNNNNNNNNNNNNNNNNNNNNNNNNNNNNNNNNNNNNNNNNNNNNNNNNNNNNNNNNNNNNNNNNNNNNNNNNNNNNNNNNNNNNNNNNNNNNNNNNNNNNNNNNNNNNNNCCGCCGGCGCCCCCACGCTCGCGCTGGCCAACGACTCCAGCCTCGTCATGTCCGACGCCGACGGCCGCGTGCTCTGGAACACGACCGGCGTCGGCAGCTCGTCCTCGCAGACGGCGCCAGCCGAGCTCGGGAACGACGGCAACCTGCTCATCCAGCTCCCGGACGGCACGGTTGGGTGGCAGAGCTTCGACCACCCGACGGACACGTTCCTGCCGGGGATGAAGGTGCGGGTCAGCCACCGGACCGGGAAGGGCGACCGGATCGTGTCCTGGAGATCCCCCGATGACCCGGCGCCGGGGCGCTTCTCCTACGGCCTGGACCCCGGCACGTCGCTGCAGCTGCTCATGTGGAACGGCACGCGCCCCTACTGGCGCAGCCCCGTCTGGAAGGGGTACGCCGTCGCCACCATGTACGTCAGCGCCGGCACGGTGATCTACACGGCGATAGTCGACACGGACGAGGAGATCTCCTTGGCCTTCTCCGTCTCCGGCGGCGCCGCGCCCACGCGGTACGTGGTGACCAGCTCCGGCAAGTTCCAGCTGCTCATCTGGAACGGCACCAGGTCGGCCTGGGCCACGCTCCAGTCGTGGCCCTCCAGCGAATGCACCACGTACAGGCACTGCGGCGCGTACGCCTACTGCGACACCACGGCGGCGCCGGCGACGTGCAGGTGCCTCGACGGCTTCGAGCCTGCTAAACCGGCAGAGTGGACCTCCGGCAGGTTCGGGCAGGGTTGCCGACGGAAGGAGGCGCTGCCGCCGTGCGGCGGCGGAGGCGGCGGCAATGGGGTGGGTTTCATAGCCATGCCCAGCATGAAGGTGCCGGACAAGTTCTCGCTGGACGCTGGCAACCGGAGCGCGGAGGAGTGCGCGGCGAGGTGCGCCGGCAACTGCTCGTGCGTGGCGTACGCGTACGCCAACCTGCAGAGCAGCAGCGCCAAGGGGGACGTGAGCCGGTGCATCGTGTGGGCAGGGGAGCTCGTGGACGCGCAGATGATCGACCCGCGCTGGGGCGGCGAGACCCTCTACCTCCGCGTGCCCGCCGCTGCCGCTTCCACTTCCCCAGGTGGAAAGGCCAGCAGAAATGCAGTGAAAATAGCAGTGCCGGTGGTAGCATCTGCCCTGCTGCTCACATGCATTTTCTTTGTATGGTTCTGCAGATACAGAGACAAGAGAAGGAAAACCGAGAGCCAGAAGAAGCTAATGCCCGGGATCAGGACCGGGACCACAAACACGTCGAGCGAGATCGGAGAAGGAGATCGCACCGGAGACCTTGAGTTCCCCTCCATAGGATTCGGCGACATCGTCGCCGCCACGGACAACTTCTCCAAGACACTCATGATCGGCCGCGGAGGCTTCGGCAAGGTCTACAAGGGAACATTAGACGGTGGTCATGTGGTAGCAGTGAAGAGGCTGAGCAAGGATTCGGATCAGGGAGCAGAGGAGTTCAAGAACGAGGCGATCCTGATCGCCAAGCTGCAGCACCGGAACCTGGTGCGCCTCCTCGGCTGCTGCACCGAGGGGGGCGAGAAGCTGCTCATCTACGAGTACCTGCCCAACAAGGGCCTCGACGCCATCCTCTTCGACAGTGGGAGGAAGTCGGTGTTGGACTGGCCGACGCGGCTGGGGATCATCAAGGGGGTGGCCAGGGGGCTGCTCTACCTCCACCAGGACTCCAGGCTGACTGTGATACACAGGGACCTCAAGGCCAGCAACGTGCTGCTGGACGCCGAGATGCGGCCCAAGATCGCCGACTTTGGCATGGCCAAGATCTTTGGTGACAACCAGGTGAAAGCCAACACCCGGAAAGTCGTCGGAACATATGGCTACATTGCTCCCGAGTACTCGACGGAGGGCGTCTTCTCAGACAAGTCCGACGTGTACAGCTTCGGCGTGCTGCTCCTGGAGATCGTGAGCGGTATCAGGGTAAGCGCGACCGAGGGCATCATGGAGTTTCCAAGCCTGATATCCTATGCATGGCACCTGTGGAGAGAAGGGAAGGCAGGCAAGCTGGTGGATCCATCCATGGCAGGGAGCTGTTCACAGGATGAGGCTTCGCTGTGCATCCACGTCGGGCTCCTGTGCGTCGAGGACGACCCGAGCAGGAGGCCGCTCATGTCCTCCGTTGTGTCCATCTTGGAGAACGGGAGTGCGTCGGCGTTGTCCCTGCCGACGCCGGTGCAGCCTGCTTTTGTCGAAATGATGGGAGAGAAGAGCCAGAGAAGCGACCTCGAGAACACCAGGAACACAATGGCCATGACCGTTCTGCAAGGTCGGTAG
>HvleckRLK3
ATGCCTCTCCTCTACATACTAGTTCTTGGGCTTCTCCTCTCACGCACTCCTCGCTGCTCCTCTTCGTCCACACCTGCAAGCGATACCCTCACTGAAGGCCAAGTGCTCGCCGTCGGCGAGAAGCTCGTCTCGACGAACGGCAAGTACGCACTCGGCTTCTTCCAGCCTGCAACGAGCACCATCAGTAAGTCCCAGAACACCACCAGCTCCAGCTCCAGCTCCAGCTCCAGCTGGTACCTTGGCATATGGTTCAATAAGATCCCGGTTTTTACCGTTGTGTGGGTTGCTAATCGGGAGCAGCCCATCCCCCATTCCAACATCAACTCAACAAAGCTCAAGTTCTCAAGGGACGGCAATCTTGTCATTGTCACAAACCGTGCCGATGCCGTCAGTGAATCCCTTGTTTGGTCCACTCACATTGTTAATAGTACACAAACCAGTAGCATAAACACCACGACCTCTGGTGCCGCTGTTCTCTTGAACAGCGGAAACCTTGCCCTGCTCACAAATAGCAAAGCGATGTTGTGGCAGAGCTTCGACTACCCAACGGATATCGCGCTTTCTGGCGCCAAGCTTGGTTGGAACAAGGTCACCGGTTTCAGTCGCAAGTTCATATCAAGGAAGAGCCTCATTGATATGGGCCTCGGCTCGTACAGCCTAGAACTAGACACCAGCGGCGTCGCCATCCTCAAGCGCCGCATCAATCCCTCTGTAGTCTATTGGCATTGGGCCTCCTCCAAGACATCATCACTGAGTGTTCTTCCAACCCTCAAGACAATTATAGATCTGGATCCACGCACCAAAGGCCTGATGAACCCTATATATGTTGACAATGACCAAGAGGAGTACTACATGTACACTTCGCCGGAGGAATCATCGTCTTCCCTGTTTGTCTCACTAGACATCTCTGGCCAGGTCAAGCTGAATGTTTGGTCAGAAGCCAACCTGTCATGGCAAACCATATGTGCTGAGCCTGCCGATGCCTGCACTCCAGCTGCTACCTGCGGACCATTCACAGTCTGCAACGGCAATGCACAGCCATCCTGTGATTGTATGGAGGGCTTTTCTCGGAAGTCACCACAGGATTGGGAGTTTGATGATCGAACAGGAGGATGCATCAGGAACACACCTTTCAATTGCAGCACTCGTGGTAACAACAAAAACATGACAAGTTCAACAGACATATTCCACCCCATTTCTCAAGTTGCATTACCCTACAACCCACAAAGCATTGATGTTGCTACCACTCAGAGCAAATGCGAAGAAGCTTGTCTCAGTTCCTGCTCCTGCACTGCTTATTCCTATAACAATAGCAGATGCTATGTCTGGCATGGTGAATTGCTCAGTGTAAATCTGAATGATGGAATTGATAATAATTCTAAAGATGCTCTTTACCTTCGCCTTGCCGCGACTGCAAAGTTTGAAAAAAAGAAGAAACAGACAAACATTAGATTTGTAGCTGCTGCAAGTATTATTGGTTTTGGGTTACTGGTGCTGATGCTGTTGGCACTGATTTGGAGGAACAAATTCAAGCCATTATACAACAATCAAGTTAGTGGTGGTGGGATTATGGCCTTTAGATACACTGATCTAGTTCGTGCTACTAAAAACTTCTCAGAAAAGCTCGGAGGGGGTGGTTTTGGTTCAGTATACAAAGGAGTATTAAACGGCTCAACTAGTATAGCAGTGAAAAGGCTTGATGGTGCCCGTCAAGGTGAGAAGCAATTCAGGGCTGAGGTGAGCTCAATTGGACTGATCCAACATATTAACATAGTAAAATTGATCGGTTTCTGCTGCGAAGGTGATCACAGGTTACTTGTGTATGAACACATGTTAAATGGTTCTCTTGATGGTCATCTATTTGAGAAGAGCAATGCTGCTGTTGCTGTCCTAAATTGGAACACCAGATATCAAATAGCCTTAGGAGTTGCCAAAGGATTGTCTTACTTGCATCAGGGTTGTCACAAATGCATCATACATTGTGACATTAAGCCAGGAAACATACTCGTGGACGCATCTTTTGTTCCTAAAATTGCAGATTTCGGGTTGGCAGCGTTTGTGGGAAGGGATTTTAGCCGAGTTCTGACTACATTCAGAGGAACTGCTGGTTATCTTGCCCCAGAGTGGCTTAGTGGAGTTGCAGTCACACCAAAAATTGACGTTTACGGCTTTGGTATGGTACTGCTGGAAATCATATCAGGAAGGAGGAATTCCTCGATTGAAACACCATACAACACCAGCGACAGTAGCAGTTACCAGAATGTTGAATACTTCCCTGTGCAAGCCATCAGCAAGCTTCACAGCGGAGATGTGAAGAGTTTGGTGGATCCACAATTACATGGGGATTTCAATTTGGAAGAAGCTGAAAGAGTTTGCAAAGTTGCATGCTGGTGCATACAAGATAATGAGTTTGATCGTCCGACTATGGGTGTAGTAGTCCGGGTTCTTGAGGGTCTGCAAAAGATTGATATGCCCCCGATGCCAAGACTACTTGCAGCTCTAACGGTCTAA
>HvleckRLK4
ACATCCACACTCCTCTCCATGCATCCCCTCCACATATTACTTCTTGGGATTCTCCTTCTGCCCACATCCTGCTGCTCCTCGTCTGCACCCGCAGATGATACTCTCGTGGCAGGCCGAGTGCTCACCGTCGGCGATAAGCTCGTCTCAAGAAACGGCAAGTTCGCCCTCGGCTTCTTCCAGCCAACAGCAGTAAGCACCATCAGTAAGTCGTCCCACAACAGCTGGTACCTTGGCATATGGTTCAATAAGATTCCGGTTTTCACTACCGTGTGGGTAGCTAATAGGGAGGAGCCGATCGCCCACCCCAACATTAACTCAACACAGCTCAAGATCTCGAGTGACGGCAATCTTGTCATTGTTGTAAAACATGCTGATGTTGGCACCGAATCCCTTGTTTGGTCCACTCGCATCGTCAATAGGACACAAACTAGCACCATAAACACCACCACCACTAGTGTTGCCATTCTATTGAACACAGGAAACCTTGCTGTCAAAGTCACAGATAACCCATCATCTGACTTGTGGCAGAGCTTCGACTACCCAGCAGATGTTGTGCTCCCTGGCGCCAAGCTTGGCTGGAACAAGGTTACCGGCTTGAATCGCCATATCATCTCAAAGAAGAGTCTCGTTGATATGAGTCTTGGTTTATACAGCCTTGGACTAGACACAACTGGCCTCGCCATCCTCGAGCGTCGCAAAAATCCCGCTGTAGTGTTTTGGCATTGGGCATCCTCCAAAACATTGTCAATGAGTATTATACCAGTGCTCAAGACAATTCTAGATATGGATCCACGGACAAGAGGCTTGATTAACCCAAAATATGTTGACAATGACCAAGAGGAGTACTACATGTACACTTCCCCGGATGAATCACCATCTTCCACGTTTGTTTCACTAGATATCTCTGGTCTGATAAAGGTGAATGTGTGGTCACAATTGAACCAGTCTTGGCAAACCATATATACTGAACCTACTCATCCCTGCCTTCCGCCTGCTACTTGCGGACCTTTCACAGTCTGTAGTGGCAATCCACATCCATCCTGTGACTGCATGCAGAGCTTCTCTCAAAAGTCACCGCAAGATTGGGAGTTTGAGGATCGAACAGGAGGATGCATCAGAAATACACCGTTAAACTGTACTAGTGGTAAAAACATCATGAGTTCAACAGACTTGTTCCAACCCATTTCTCAAGTTTCATTGCCCTACAACCCACAGAGCATAGATGCTGCTACTCAGAGCCAATGCGAAGAAGCTTGTCTCAAAACCTGCTCCTGCACTGCTTATTCCTACAATGCTAGCAGGTGCTCTGTATGGAATGGGGAATTGCTTAGTGTGAGTGTGGATGATGGCGTTGTTTACAATTCAAAAGATATTCTTTATCTCCGTCTTGCTGCCAAAGATTTCTTGCCAAGTTTGAGAAAAACCAAAAGAAAACCAAATGCTAGAATTGTTACTGCCGCAAGCATTTTTGGTTTTGGGTTACTCATGTTCATGATGTTTTTACTGATTTGGAGGATCAAATTCAAGTCATGTGGTTTTCTGCCAATATATCACGGCGATCGAGATAGTGCTGGTGGAATTATAGCCTTTAGATACACTGATTTAGTTCGTGCTACAAAAAACTTCTCAGAAAAGCTAGGAGGAGGGGGTTTTGGCTCGGTATACAAGGGTTTATTAAGTGACTCAAAGACTACTATAGCAGTCAAAAGGCTTGATGGTGCGCATCAAGGAGAGAAGCAGTTCAGGGCTGAGGTGAGCTCAATTGGACTGATCCAACATATCAACCTAGTCAAATTGATTGGTTTCAGCTGCGAAGGTGATCATAGGTTACTTGTGTATGAACACATGTCGAATGGGTCTCTTGATGGTCATCTATTTAAGAAGATTAATGATGCCTCTGTTGTCCTAAATTGGAACAATAGATATCAAATAGCCCTAGGGGTTGCTAAAGGATTGTCCTACTTACATCAGAGCTGTCACAAATTCATCATACATTGTGACATTAAGCCAGAAAACATATTATTGGACGCATCATTCGCTCCCAAAGTTGCGGACTTTGGGCTGGCGGCGTTTGTGGGAAGGGATTTTAGCCGAGTTTTAACTACAATCAGAGGAACTGTAGGCTACCTTGCCCCAGAGTGGCTTAGCGGAGTTGCAATCACACCGAAGATCGACGTTTACAGCTTTGGCATGGTACTATTGGAAATCATATCAGGAAAGAGGAATTCCTCACTTGAAACATCATACTATACTAGCAGCAGCAACAGTTACCATAATGTCAAATATTTCCCTCTGCAAGCCATCAGCAAGCTTCACAGTGGAGATGTAAAGAGTTTGATGGATCCACAATTACATGGCCACTTCAATTTGGAAGAGGCTGAAAGAGTTTGTAAAGTTGCGTGTTGGTGCATCCAAGATAATGAGTTTGATCGGCCCACTATGGGTGAAGTGGTCCGGGTTCTGGAGGGTCTACAGAAGATTGATATGCCCCCCATGCTAAGGCTGCTTGCAGCTCTAACAGAACACTGA
>HvleckRLK5
ATGGCAACCATCGGTCCTGCAACTCCTGCGTTGCATGCGGTGATGGCTGCTCCTCCTCGTCGTCATCTTCCCCTGTTCGTATTTTTCACCATGCCTCCTCTCTACATACTACTCGGGCTTCTCCTCTTACACACTCCTGCTTGGTGCTCCTCTGCAGCTGCCACCGAAGACACTCTCACGGTGGGCCAATCGCTCGGCGTTGGTGACAAGCTCGTCTCAAGAAACGGCAAGTTCGCCCTTGGCTTCTTCCATCCAGCAGCAAGCAGCATCAGTAAGTCGTCCCGCAATGCCACCTCCCCCACCTTCAGCTGGTACCTTGGCATATGGTTCAATAAGATCCCAGTTTTCACTACTGTGTGGGTTGCTAATAGAGAGGAGCCCATCACCCACCACAACCTCAACCTGACACAGCTCAAGATCTCAAGCGATGGCAATCTTGTCATCGTAAACCATGTTGCCAAAACTCAATCCATTGTTTGGTCCACTCACATTGTCAAGAGGAATTCCAGTAGCATAAACACCACAACCTCTATAACCGTTGTTCTCTTGAACAGTGGTAACCTTGCCCTACTCGCAAATAGCCCAGACATGTTGTGGCAGAGCTTCGACTACCCAACAGATGTTGCGCTTCCTGGTGCCAAGTTGGGCCGGAACAAGGTCCCAGGTTTCATTCGTCAGTACATATCAAAGAAAAGCCTCATTGATCAGGGTCTAGGCTCATACAGCATTGAACTAAACAGCGCCGGGATCGTCCTCAAGCACCGCAACCCCTCGGTAGTGTACTGGCTTTGGACATCCTCGAGGACATCATCATTAAATCTTGTACAATTAATCAAGACCACGTTAGATTTGGATCCCGGGACAAGAGGTTTGATTAACCCAACATATGTTGACAACGACCAAGAGGAGTACTACATGTACACTTCGCCGGACGAATCATCATCTTCTGTGTTTGTCTCAATGGACATCTCTGGTCAAATAAAGGTGAACGTTTGGTCACAATCCAGCCAGTCTTGGCAAAGCATATATTCCGAGCCTGCCGATCCCTGCACTCCGCCTGCTACGTGTGGACCTTTCACGGTCTGCAACGGCATTGCACGTCCATCCTGTGATTGTATGGAGAGCTTCTTCCAGAAGTCACCAAAGGATTGGGAGTTTGAGGATCGAACAGGAGGATGCATCAGAAATACACCGTTACATTGCAACACTAGTGATAACAACAAAAACCTGACAAGTTCAACAGACATATTCCACCCCATTGCTCAAGTTGCATTGCCCTACAACCTGCAAATTATAGATGTTGCTACCACTCAAAGCAAATGTGAAGAAGCATGTCTCGGTTCCTGCTCATGCACTGCTTATTCCTATAGCAATAACCGATGCTCTTTCTGGCATGGGGAATTGTTTAGTGTAAATCTTAATGATGGCATTGATAATAACTCAGAAGATGTTCTTTATCTTCGCCTTGCTGCCAAAGATTTACCGCGTGGTTCCAGAAAAAACAAAAGAAAACTAAAGGTCAGAGTTGTTACTATCGTAAGTATTATTGTTGTTGGGTTAATTATGGTCGTGCTATTGTTACTGATTTGGAGGAACAAGTTCAAGCGGTATGGTTTTTCTATATACCACAATCCAGGTAGTGCTGGTGGAATTGTAGCATTCAGATACACTGACTTGGTTCGTGCTACTAAAAGCTTCTCGGAAAAGCTTGGAGGAGGTGGTTTTGGTTCTGTATACAAGGGGATGTTAAGTGACTCAGCGACTACTATAGCAGTGAAAAGGCTAGATGGTGCCCGTCAAGGAGAGAAGCAATTCAGGGCCGAGGTGAGCTCAATTGGACTGATCCAACACATAAACCTAGTAAAATTGATTGGTTTCTGCTGCGAAGGTGATCACAGATTACTTGTGTATGAACACATGTTAAGTGGGTCTCTTAATGGTCATCTATTTAAGAAGAGCAATACAAATGTTGTCGTCCTAAATTGGAACATCAGATATCAGATATCCATAGGAGTTGCTAGAGGATTATCCTACTTGCATCAGGGCTGTCGCGAGTGCATCATACACTGCGATATTAAGCCAGAGAACATACTTCTGGATGCATTATTTGTTCCTAAAGTTGCAGACTTTGGGTTGGCAGCCTTTGTGGGAAGGGATTTCAGCCGAATTCTCACTTCATTTAGAGGAACTGCAGGTTATCTTGCCCCAGAGTGGCTTACCGGAGTGGCGATCACACCGAAAGTCGATGTTTATAGCTTCGGCATGGTGCTGTTGGAAATCATATCAGGAAGGAGGAATTCCTCATCTGAAACATCGTACAACACTAGCAGCAGCAACAGTAACCAGGATATTGAATATTTCCCTGTGGAAGCCATCAGTAAGCTTCATGGTGGAGATTTGAAGAGTTTGGTGGATCCACAGTTACATGGTGATTTCAATTTGGAAGAGATTGAAAGGGTCTGCAAAGTTGCATGTTGGTGCATCCAAGATAATGAGTTGGATCGGCCGACAATGGGTGAAGTAGTCCGGGTTCTCGAGGGTCAACAGGATATTGTTGTGCCCCCAATGCCAAGATTGCTTGCAGCTATAACAGAGCAATCTGGTGCTGCAACTTCAGTAGAGCTA
>HvleckRLK6
CAACCTAGAAACCTATATACATCCAAGCACTACGACGAGTTACTCAGAAAGTTCAAACTCCCACGCTCCTTCCAGCTCTGGGTGGCTGGGTATTCTTCCAAGTTCCCATCCATGGCTCCTCTCGTTTTCCTCCTCCTATTCGGCCAATTCCTACTCTGCACAGCCGTCGACACCATCACCTCCACCACACCATTGTCCGGTTCACAGCAGATTTTGTCCCAGGGCAGCAAGTTCGCCTTGGGCTTCTACTCCCCACCACGAGGTAACACCACCACTTCCAGCTACTACATAGCCATATGGTACAGCACTATACCACTGACCACCGTGTGGACGGCAACCACCGACATGCTGGTGTCTGAACCAGCCTTTGTCTCCTTGGAAATCGCCCGTGACGGCAACCTTGTCCTCCGTGATAAATACACTAATCAGCAGCTATGGTCGACCAATGTAAGTATAGCCTCCAACTCCACCATGGCCATCATCAGGGATAGCGGTAGTCTCGAACTCACCGATGCCTCCAATTCATCAATGGTTTATTGGCAAAGCATAGACCATCCCACAAACACCTTTCTTCCAGGGTCAAAACTTGGGCTGAACAAAGCCACGGGTCTAAGCCAGAAGCTTGTTCCTTGGAAGAACAGCGCAGACCCATCTCCTGGGTTGTTCTCTCTGGAGCTAGACCCCAATGGCAGCACACAGTACTTCATTCGGTGGAATGAATCCATAAACTACTGGACCAGTGGCCCCTGGGACGGCAATAGATTTAGCCTTATGCCAGAGATGACGGCCGGTTACATTTACGACTTCCAATTCGTCAACAACGCCAAAGAAAGCTACTCGTACTACTCGGTGAAGAATGATTCAATACTCTCGAGGTTCATCATTGACGTGACCGGAGAGATCAAGCAGCTGATATGGTTGGATTACTCACGGGAGTGGGTCTTGTTCTGGTCCCAGCCACGGACTCACTGTGAGGTGTATGCGCTCTGTGGGGCATACAGCAGCTGCAATGGAACTGTGCTGCCGCACTGCAACTGCATCAAGGGGTTCAGCCAGAAGGTTCAGAGTGACTGGGATCTCCAGGATTACAGTGGTGGGTGCAAGCGGAACACACCATTGCAGTGCCAGACCAACTTGACTTCTGCACACGCTCCATCTGACAAGTTCCATGTCATGGAAGATGTGCGTCTACCTGATAACTCTCAGGGTGCAGTGGCTACAAGCTCTCAGGAATGTCAGGTGGTTTGTCTGAATAGTTGCTCTTGCACTGCTTACGCTTACAATTACACTGGATGTTTTGTTTGGCATGGGGACCTGATAAATCTCCAAGAACAGTACAGGGGAATTGGAGGAGGCACACTCCTCCTCAGGCTTGCAGCATCCGAGCTGCCAGATCAGCAAAGGAAGAAAACAATGGTCATTGTTTCAACTGTTGGTGGGGTTGCTGCAGTTTTGATGATCCTTGCAATCGTCTTGTTCTTTCTATCTCGGATGTGCCGCCGAGACAGGACTTTTCGGATATCCAAGACTGCTGGGGCCGCACTGACTGACTTCAGATACAGTGATCTGTTGGATGATACTCAAAGCATCGATTCACTTCTTCTCAATCTATCAACGCTAAGAGTGGCTACAAATGACTTCGGCGAAGGAAATATGCTTGGTAAAGGAGGTTTTGGGATGGTTTATAAGGGAGTCCTACCTGACGGTAAACAAATAGCAGCAAAAAGGCTATCTCAGAGTTCCAGACAAGGAATAGGGGAACTAAAAAGTGAACTAGTCCTTGTTGCTAAGCTTCGCCACAGGAATCTTGTGAGCCTCGTAGGCGTTTGTTTGGAAGAACAAGAGAAAATACTTGTTTATGAATTCATGCCAAACAGAAGCCTTGATACCATTCTTTTTGATTCTGAGAAACGCAAAGACCTAGACTGGGGGAGGAGATTCAAGATTATCAGTGGAGTTGCTAGGGGATTACAATATCTCCACGAAGATTCTCAACTGAAGATAATTCACCGGGACCTGAAAGCAAGCAACGTTTTGTTGGACTTTGATTACAACCCTAAGATTTCCTACTTTGGCTTAGCGAAGATATTTGGAGGGGATCAATCAGAAGATGTCACTAGACGTATTGCCGGGACATATGGATACATGTCGCCTGAATATGCCATGCATGGTCAATACTCAGCAAAGTCGGACGCGTTCAGCTTCGGTGTTTTGGTTTTGGAGATCGTCACAGGAAGAAGAAACAATGGCTCATGCAACTCTGAGAAATATGTTTATCTTGTAAATCTTGTATGGGAGCACTGGACCAGGGGAAATGTCATCGAGTTGGTCGATCCATACCTTAGCGGCCATCCCTCTCACGTTGACCAGGTGCTGAAGTGCATCCAAATCGGGCTGTTGTGTGTGCAGAACAGGCCTGAAGATAGGCCGACAATGTCATTGGTAAATGCCATGCTTACCAGCCAGAGTGTTCGTCTCCCTTCTGTTTCCATGCCAGCCTTCTGTGACAGATTGAGTGGATGCAGTGGTAACTCAGAATCGGCGTCTTCGAATGGAATGACCATTACAAAGCTCGAGCCAAGATGA
>HvleckRLK7
ATGGCCAGCCACCAGCTACGCCTCTTGGAGCTGCTGCTGATGCTCCTGCTCTCGTCGGCTTCCCATGCCCGGGACATCATCTCGCCGGGCCAGCCGCTCAGGGGCAACGACACACTGGTCTCGTCCGGCGCCGGCAGTTTCGTGCTGGGCTTCTTCACGCCGCCGGGCTCCAACAACACCTACGTCGGGGTGTGGTACGCCAAGGTCTCCGTCCGCACCGTCGTCTGGGTCGCCAACCGCGCCGACCCCGTCCCGGGCCCGGTGGAGCGCAACGCCCGCGCGACCCTGTCCGTCTCCGCCGACGGCACGCTCTCCGTCGCTGGCCCCAACTCCACCGTTGTCTGGTCGGTCCCCCCAGCGCCGGGAGCGGGCGCCGGCCGGTGCACGGCGCGGTTACTGGACAGCGGGAACCTCGTCGTCTCGGACGCGAGCGGCGCCGTGGCGTGGCAGGGGTTCGACCACCCCACCGACACTCTGCTCCCGGGGATGAGGGTGGGGATGGACTTCGGCACCGGCGCGAACATGACGCTGACGGCGTGGACGAGCCCCTCCGACCCGTCCCCCGGGCCGTTGGTCGCGGTGATGGACACCTCCGGCGACCCAGAGGTGTTCATCTGGAACGGCGCCGAGAAGGTGTGGCGGTCCGGGCCCTGGGACGGCCTGCAGTTCACGGGTGTCCCGGACACGGCCACCTACATGGGCTTCAACTTCAGCTTCGTCAACACCCCCAAGGAGGTGACCTACAGCTTCCAGGTGGCCAACTCGAGCATCGTCTCCCGGCTAACGCTCAACAGCACGGGCGCCGCCGGCGGGCTGCTGCAGCGGTGGACGTGGGTGTGGTCCGCCGGCGCGTGGAACATGTACTGGTACGCGCCCAAGGACCAGTGCGACGCCGTGAACCAGTGCGGGCCCAACGGGGTGTGCGACCCCAACAGCCTGCCGGTGTGCGAGTGCCTCCGCGGGTTCGCGCCGCGGTCGCCGGAGGCGTGGGCGCTGCGGGACAACCGGGCCGGGTGCGCGCGCGCGACGCCGCTCGACTGCGGCAACGGCACCGACGGCTTCGCGCTGATGGCGCACGCCAAGGTGCCGGACACGACGGCCGCCGTGGTGGACTTCCGCGCCGGGCTCGCCGAGTGCGCGCGGCTGTGCCAGAGGAACTGCTCGTGCACGGCGTACGCCAACGCCAACCTGAGCGGCGCGCCGGGCCGCCGCGGCTGCGTCATGTGGACGGGCGCGCTCGAGGACCTCCGCGTGTTCCCCAACTACGGCCAGGACCTCTACGTGCGCCTCGCCGCAGCCGATCTCGATGCAATTAGCAAGTCCGATAAGAAGGCGCACGTCATAATTGCAGTCGTTGTGAGCATCTGTGCACTGGTAGCTATTTTAGCACTTGTAGGGTTCTTCTTGTGGAGAAGAAAGAGGACAAAAGCAAGACAATCAGTAGGTTCACAAAGTAAATGGAGTGGTGTTTTGCACAGTAGAACACTACAAAGTGAAGGAACTAGTCATGGGGTCGATCTGGATCTGCCAATATATGATCTGGAGACAATAGCAGAAGCCACACAAGGCTTCTCAACTGACAACAAGCTCGGTGAAGGTGGCTATGGGCCAGTATACAAGGGTAAGCTTGAGGATGGACAAGAAATAGCTGTCAAAACACTTTCTCAGGCATCGACACAGGGTCCCGATGAGTTCAAGAATGAGGTTATGCTGATAGCGAAACTCCAGCATCGAAATCTTGTTCGGCTGATCGGCTGCTGCATCTGTGGACAAGAGAAGATACTCATATATGAATACATGGAAAACAAAAGCCTGGACTTCTTTCTGTTTGACAAATCCAGAAGCATGCTTCTTGATTGGCAAACCCGGTACCGCATAATCGAGGGGATTGCCCGAGGTTTACTGTATCTTCATCAGGACTCGAGATACAGGATCGTCCACAGAGACCTCAAGACAAGCAACATTCTTCTGGATAAGGACATGACCCCGAAGATTTCAGATTTCGGCATGGCGAGGATATTCGGTGGTGACGACTCTGAGATCAATACGCTTCGAGTGGTCGGAACGTATGGCTACATGGCTCCCGAGTACGCGATGGACGGGGTTTTCTCGGTGAAATCAGACGTGTTCAGCTTCGGTGTCATAGTGCTGGAGATCATAACCGGTATCAGGAACAGAGGCGTGTACAGCTACTCCAACCACCTAAACCTTCTAGCACATGCGTGGAGCTTGCTGAGCGAGGGGAAGAGCCTGGAGCTGGTGGACGAGACCCTGAAAGGGACGTTCGACTCGGAGGAGGTGGTCAAGTGCCTCAAGGTGGGGCTGCTGTGCGTGCAGGAGAACCCGGACGACCGGCCGCTCATGTCGCAGGCGCTCATGATGCTCGCCGCCGCCGACGCCGCGTCCCTGGCGGCCCCCAAGCAGCCCGGCTTCGCGGCGAGGCGAGCCGCGGCGACGGCGACGGTGACGGTGACGGAGGACACGTCGTCGAGCAGGGCCGACCGCAGCTTCGTGGACAGCATGACCATCACCATGATCGAGGGCCGTGAAAAGAAATCAATGGATGGGTGA
>HvleckRLK8
ATGTCTGCCTTCGACACATTACTCGTGCTTCTCCTCCTCTCCTCCTTGCACGCCCCTCCATGCTCCTCCACAACTTCACATGATACTCTCACGGCAGGCCAAACGCTTGCCGTCGGCGACAAGCTCGTCTCAAGCAACGGCAAGTTCGCGCTCGGCTTCTTCCGGCCTGCAGCACGCACCACCACCAGTAAGTCCGACACCACCACCTCCCCCAACTGGTACCTTGGCATATGGTTCAATAAGATTCCGGTTTTCACAACTGTCTGGGTTGGTAATAGAGATAAGCCAATATCCGACTCCGAGCTCCACCTAACACAGCTCAAAATCTCAACCGATGGCAATCTTGCCATCGTGAACCATGCCGGTACCGAGTCTCTACTTTGGTCCACTCACATCATCAATACAACACAAACCAACATAAACATCACTAGTACCGCCGTTCTCTTCAACAACGGAAACCTTGTCCTCACACAAGGCCCATCATCTGGTCTGCCGTTGTGGCAGAGCTTCGACTACCCAACAGATGTTCTGCTTCCTGGTGCCAAGGGAGGCCGGAACAAGCTAACCGGTTTGAGTAGACTGGGTATCTCAAAGAAGAGCCTGATTGATCCAGGACTTGGCTCATACACCCTTGAACTAGCCACCAGTGGGATCATCATGAAGCGCCGAAACCCCTCAGTAGTGTACTGGAATTGGGAATATGGAACATCACAAATGTCCAAACTTTTACCAGTAATTATGATGGTTCTAAATGCGGATTCACGGACCAAAGGTTTGATTAACGTAACATATGTTGATAACAACGAAGAGGAGTACTACATGTACACTTCACCGGATGAATCATCTTCCACATTATCACTAGACATCTCCGGTCAGATCAAGCTGAATATATGGTCGGAGGCCGAACAGTCTTGGCAAACCGTACAATCCAAACCTATTGATCCCTGCACTCCGACGGCTACCTGCGGACCTTTCACGGTCTGCAATGGCACTGCACGCGGTACTGCACGTCCATTCTGTGATTGTATGGAGAGCTTCTCTCAGAAGTCACCAGCGGATTGGTACCTTGATGATCGGACAGGAGGATGCATCAGAAATACACCATTACATTGCCCTACCAAAAAAAACAATACAAGTTCAACAGACATGTTCCACCCTATTGCTCATGTTACATTGCCCTACAATCCGAAAAGCATACAAAATATTACCACTCAGAGGAAATGTGAAGAAGCTTGTCGAGGTTCCTGCTCCTGCACTGCTTACTCCTATAACAATAACATGTGCTCTGTCTGGCATGGGGAATTGCTTAGTGTAAATCTGAATGATGGCATTGAAATTTTTTCTGAAGATGTTCTTTACCTTCGCCTTGCTGCCAATGATTTCCCAAGTTTGAGCAAAAACAAAAGAAAACTAAACATTGGAGTTGTTATTGCTGCAAGCATTATTAGCTTTGCATTAATAATGCTCGTGATGTTATTGGTGATACGAAGGACAAAGCTCAAGTGGTGTTGTTCTCCATTATACGATAACCAAGGTTGTGGTGGAATTATTGCCTTTAGATACACTGATTTAGTTCATGCTACAAAAAACTTCTCTGAAAAGCTGGGAGGAGGTGGTTTTGGCTCTGTTTATAAGGGAGTGTTGAGTGGATCGACTCCTATAGCAGTGAAAAGGCTTGATGGTGCTCGCCAAGGAGAGAAGCAATTTAGGGCTGAGGTGAGCTCACTTGGACTGATCCAACATATCAATCTAGTCAAATTGATTGGTTTCTGCTGTGAAGGTAATAATAGGTTGCTTGTCTATGAACATATGCTACATGGCTCTCTTGATGGTCATCTATTTAAGAGCAATTGTGTTGTGTTAAGTTGGAGTACCAGGTATCAAATAGCCCTAGGAGTTGCTAGAGGATTGTTCTATTTGCATCAGAGTTGCCACAAGTGCATCATACACTGTGATATTAAGCCAGAAAACATACTCCTGGATGCATCATTTGCTCCTAAAGTTGCGGACTTCGGGTTGGCAGCGTTTCTGGGAAGGAATTTTAGTCGAATTCTGACTACATTCAGGGGAACTGTAGGTTATCTTGCCCCAGAGTGGCTTAGTGGAGTTGCTGTTACACCCAAAATTGATGTTTATAGCTTTGGCATGGTATTGTTGGAAATCATATCGGGAAGGAGAAATTCAGGTGAAGAATGCACCAGCAACAGTTACCATGTTGAATATTTCCCTGTACAAGTGGTCAACAAGCTTCATGAAGGGGATGTGGGGAGTTTGGTGGATCCACAGTTACATGGTGACTTCAATACGGTACAGGCTGAAAGGGTTTGCAAAGTTGCATGTTGGTGCATTCAAGATAATGAGTTTGATCGGCCGGCGATGGATGAAGTGGTACGTGTTCTTGAGGGTCTACAGGAGATTGATATGCCCCCGATGCCAAGACTGCTTGCAGCTATAGCAGAACAATCCGATGCAACATCAATGTAA
>HvleckRLK9
CACCGTCGACTCTTCGTGGCATTTCTCTCAGTGCTGCTCCTCACGGCCGCGGCCGTCGCCGCCGACAGCACCTTGACGCAGCGGAGTGCCATCGGCGGCGACCAGCTGAGGCTTGTCTCACCGGGAGACATCTTCCAGCTCGGTCTTTTCTCGGTCGCCAACAACACCAAGTGGTACCTCGGCATATGGTTCACCGTCTCCCCGTCCGCCGTCGTCTGGGTCGCCAACCGCGACCGCCCGCTCAACGCCTCATCCTCCGGCATCCTCGCGCTCAGCGGCCGAGGAGACCTCGTCCTCCTCGACGCCGCGAGGAATAACGAGACCGTCTGGTCGTCTAACTCCTCTGCCGCGGCGGCGGTCGCGCAGCTCCGCGACAACGGCAACCTGGTGCTCGCGGACGCGGCCGGCGCCGTGGTGTGGCAGAGCTTCGAGCACCCGACCAACACGTTCGTGGCGGAGATGCGGTCCGGGAAGGACCTGAAGACCGGCACGCTTTGGGCCCTCTCGTCGTGGCGCGGCGCCGACGACCCGTCGCCCGGCGACTTCCGGTACGTGATGGACACCAGCAGCGGCTCGCCGGAGCTGCACGTGTGGAGCAAGGGGCGCAAGGCGTACCGGACGGGGCCGTGGAACGGGGTGCGGTTCAGCGGCATCCCGGAGATGACGGCCTTCGAGGACATGTTCGAGTTCCGGTTCACCAACACCCCCGACGAGGTCTCCTACGTGTACCGCGACCGCGCCGGCACGCCGGCGTCCCGCGTGGTGCTGAACGAGACCGGCGTGATGCAGCGCATGGTGTGGAACCAAGCGGCGGGCACGTGGAGCGTCTTCTGGTCCGGGCCGCGCGACCAGTGCGACCGCTACGGCGCGTGCGGCGCGTTCGGCGTCTGCAACGTGGTGGACGCCGTGGTGTGCGGCTGCGTCCCGGGGTTCCGGCCGAGCTCGCCGCCGGAGTGGCGCATGCGGAACGCGTCCGGCGGGTGCGCACGCAGTACGGCGCTGCAGTGCGAGGGCGGCGGCGAGGACGGTTTCTACGCCCTGCGCGGCGTGAAGCTGCCGGAGACGCACGGCAGCAGCGTGGACGCCGGGGTGTCGCTTGACGAGTGCCGCCGGAGGTGCCTGTCCAACTGCTCGTGCACGGCGTACGCCGCGTCGGACATCCGTGGTGGCGGTGGCGGGAGCGGGTGCATCCAGTGGTTCGGCGAGCTGATGGACACGCGATTCGTCGACGGCGGACAGGATCTCTTCGTCAGGCTGGCATTGTCGGACCTAGAGACAACCAAGAACAAGAAGTTTCTCACGGTCATCGCAGCGGTGATAGCAGGGTTTGCATTGCTTCTGTTGTCACTTAGCTTCCTGATCTGGAGAAAGGTCCAGCGCCGCAGGATGGAAGTCGCCATGTTTGATGACATCACGAGAGGCGAATGCCCTACGTACCACCTCGAAACCATTAGGGCAGCCACCGACGGTTTTCGCCCCGAGAACGAGATCGGACGCGGTGGCTTTGGCATCGTCTACAAGGGTCAAATGCTAGACGGCCAGGAAGTTGCAGTGAAGAGGCTGTCGGCGGAGAACCGAGTGCAAGGACTGAAAGAGTTCAAGAACGAGGTGGACCTCATCGCCAAGCTGCAGCACCGTAACCTCGTACGCTTGCTCGGCTGCTGCATCCACTGCTCCGACAGGATACTCGTCTACGAGTACATGAGCAACAAGAGCCTGGACACCTTCATCTTCGGTACCTACTTAGTGCAGTAA
>HvleckRLK10
AGGGAGATGATGAGCCAGAGCCTCCACCGTCTCTTCCTCGCTATTCTGTCCGTGCTGCTTCTCACAGTCACAGCAGCCTCGGCCGCCGCTGACAGCACGTTGACGCGGCGGAGTGCCATCGGCGGCGACCAGCTAAGGCTTGTCTCACCGGGAGACATCTTCCAGCTCGGCCTCTTCTCGGTCGCCAACCACACCAAATGGTTCCTCGGCATATGGTTCACCGTCTCCCCGGAAGCCGTCATCTGGGTCGCCAACCGCGACCGCCCGCTCAACGCCTCGTCCTCCGGCATCCTCGCGCTCAGCGGCCGAGGAGACCTCGTCCTCCTCGACGCCGCCAGCAACAACGAGACCGTCTGGTCGTCCAACTCCTCGGCCGCGGCCAGCAACAACGAGACCGTCTGGTCGTCCAACTCCTCGGCCGCGGCGGTCGCGCAGCTCGGCGACAACGGCAACCTCATGCTCGCGGATGCGGCCGGCGCCGTGCTGTGGCAGAGTTTCGATCACCCGACCAACACGTACGTGTCGGAGATGCGGATCGGAAAGGACGTCGAGACTGGGGCCGAGTGGTCCCTCTCGTCATGGCGCCACGACCACGACCCGTCAGCCGGCGACTTCCGGTACGTAATGGACACGCGGGGCTCGCCGGAGCTGCACATCTGGAGGAAGGAACGCAAGAGCAAGACGTACCGGACGGGACCGTGGAACGGGGTGCGGTTCAGCGGCATACCGGAGATGGCGACCTACAAGGGCATGTTCGAGTTTCAGTTTACCGACACCGCCGACGAGGTCTCCTACATGTACCACGCCTCCGTCGGCTCGCCGCCGTCCCGCGTCGTGCTCCATGAGTCCGGTGTGATACAGCGCATGGTTTGGAACAGCGCGGCGCTCGGGTGGAGCATCTTCTGGTCGGGGCCGAGGGACGAGTGCGACAAGTACGGCGTGTGCGGCGCGTTCGGCGTCTGCAACGAGGTGGATGCCGTGGTGTGCGGCTGCGTCCGGGGCTTCCGGCCGAGGTCGCCGGCGGAGTGGCGCATGCGGAACGCGTCAGGCGGGTGCGTCCGCAGCACGCCGCTGCAGTGCGGGGGCGGCTTCTACGGCCTGCGCGGCGTGAAGCTGCCGGAGACGCACGGCAGCAGCGTGGATGCCGGCGCCTCGCTTGAGGAGTGCCGCCGGCGGTGCCTGGCCAACTGCTCGTGCACGGCGTACGCCGCGTCGGACATCCGTGGTGGCGATGGCGGGAGCGGGTGCATCCAGTGGTGCGGCGAGCTGGTGGACACGCGGTTCATCGACGGCGGGCAGGATATCTTCGTCAGGCTGGCAATGTCTGACCTAGCTACCATGTTTGATGGCATCATCAGAGGCAAATGTCCCATGTACGATTTCGAAACCATCAGAGCCGCCACCGGTGGATTTCATCCCGAGAACGAAATTGGGCGCGGTGGCTTTGGCATTGTTTACAAGGGTCAAATGCAAGATGGCCAGAAAATTGCTGTGAAGAAGTTGTCAACTAACAACAGAGTGCAAGGCATGAAAGAGTTCAAGAACGACGTGGACCTCATTGCCAGGCTGCAGCATCGCAACCTTGTACGCCTGCTTGGCTGTTGCATCCACTACTCTGATAGGATACTCGTCTACGAGTACATGAGTAACAAGAGCTTGGACAACTTCATCTTTGATCTGAGGAGGCGTGCCACTTTGAGCTGGAAGACTAGGATGGACATCATCCTTGGCGTTGCTAGAGGGCTTCTCTACCTTCATCAGGATTCGAGGCACACTATGATCCACCGAGATCTCAAGGCAGCCAACGTTCTCCTTAATGGAGAGATGGTCGCCAAGATATCGGATTTCGGAATCGCGAAGTTGTTCAGCAACATCGACGACAACCAGGATTCCACCGTCACGGAAAGGATTGTTGGGACATTTGGTTACATGGCACCGGAGTACGCCATGGACGGCATGGTATCATTCATGCAGGATGTGTACAGTTTTGGTGTGTTGTTGCTCGAGATCGTCAGTGGGAGGAGGAACCAACGAAATTTCAACCTCATAGCTCATGCGTGGAAGCTATTTGAAGAAAACAAAAGCCTCAAGCTCCTTGACCCAACTGTGCGCGATGACTGCTCCCATGAGGAGCTAGAGCAGGCGGCGACGTGCATCCAGGTAGGGTTATTGTGCGTTCAAGAGAGCCCGAGCCAACGGCCGCAAATGGCTGTTGTGATCCCCATGTTGTCGCAGCAACAGGTGCCAAGGCGGCCACTTCGACCGGTGGTCTGCATGCCAGTGAGCACTCGGGACGATCATCTCAATAGGCAGGAGGACACGTCTAGCAACTTCCAGATGATCATTACGGACCTTGAAGGCCGGTAG
>HvleckRLK11
ATGGATCCCTTCTTCCTCCTCCTGTTCGTCCAAATCCTACTCTGCAAGGCCGGCGACACCATCAACTCCATCACACCCTTGTCCGGGTCACAGATGATCGTGTCCCAGGGCAACAAGTTCACCGTGGGCTTCCACTCCCCATCGCAGAGTAACACCACCTCTTCCACCTCCAGCAGTTACTACATAGCCATATGGTACAGCAACATACCACAGGTAACCACCGTGTGGAACACCGACGAGCCGGTGTCCAACCCGGCCACTGCCTCCTTGGAAATCGCCCGCGACGGCAACCTTGTCCTCCTTGATCAAGCCAAGAACCAGCTGCTATGGTCGACCAATGTAAGTATAGTCTCCAACTCCACCATGGCCACCATCAGGGACAGCGGTAGCCTCGAGCTCATCGATGCCTCTGATTCATCGATAGTTTATTGGCGAAGCATAGACCATCCCACAAACACCTGGCTTCCGGGGGGCAAGCTCGGGCTGAACAAGACCACGGGTCTGAGTCAGAGGCTTCTTCCTTGGACGAACAAAGCAAACCCATCTCCTGGGTTGTTCTCTCTGGAGCTAGACCCCAATGGCACAAAACAGTACTTCGTCCAGTGGAATGAATCCATAAACTATTGGACCAGTGGCCCCTGGAACGGCAAAATCTTCAGCCTTGTGCCAGAGATGACGGCCGGTTACTATTACAACTTCCAATTCGTCGACAATGCCACAGAAAGCTATTTCTACTACTCGATGAAGGATAATACAGTCATCTCGCGGTTCATCATGGACGTGACCGGACAGATCAAGCAGCTGACGTGGTTGGATAACTCACAGCAGTGGATCTTGTTCTGGTCACCGCCACAGAGGCAGTGTGAGGTGTATGCACTCTGTGGGGCATTCGGCAGCTGCAGTGAGGCTGCGCTGCCGTACTGCAACTGCATCAAGGGATTCAGCCAGAATGTCCAGAGTGATTGGGATCTCGAGGATTACAGGGGTGGGTGCAAGAGGAACATACCATTGCAGTGCCAGACCAACTCGAGCTCCGGGCAGACTAAGCCTGATAAGTTCTATCCCATGGCAAGCGTGAGGCTACCTGACAATGCTCAGAGGGCAGAGGGCGCCAGCTCGAAAGAATGTGAGCAGGCTTGTCTGAAAAGCTGTTCATGCGATGCTTACACTTACAATACCAGTGGCTGTTTTATTTGGTCTGGGGACCTGGTGAACCTCCAAGAACAGTACAGTGGAAATGGAGTTGGCAAACTCTTCCTCAGGCTTGCAGCGTCAGAGCTGCAAGACCCAAAAACGAAGAAGGTAGCAATCGTTGGTGCAGTTGTTGGTGGAGTTGCTGCAATTCTGATAATCCTTGCAATTGTGTTTTTCTTCCTATATCAGAAGTTTCGCCGAGAAAGGACTCTTCGGATATCAAAGACTGCTGGCGGCACATTGATTGCTTTCAGGTACAGTGATCTGCAGCATGTCACCAAAAACTTCTCAGAGAAGCTGGGGGGAGGTGCCTTCGGCTCGGTGTTCAAAGGGAAGCTCCCAGATTCAACTGCCATTGCTGTGAAGAGGCTCGATGGGTTTCATCAAGGGGAGAAGCAATTCCGTGCTGAGGTGAGCACGATTGGGACAACCCAGCATGTTAATTTAGTCCGCCTTCTTGGGTTCTGTTCTGAAGGATCAAGGAGGCTGCTTGTGTATGAGTACATGCAAAAAGGCTCCTTGGAAGTGCAACTCTTCCCTGGTGAGACAACTGCTTTGAGCTGGGCCGTTAGGTACCAAATTGCACTTGGAACAGCAAGAGGCCTAAACTATCTGCATGAAAAATGTAGGCATTGCATCATACACTGTGATGTCAAGCCAGATAACATTCTCTTGGATGATTCCTTTGTACCCAAAGTATCCGACTTTGGTCTAGCAAAGCTCTTAGGCCGGGACTTCAGCCGTGTTTTAACGACGATGAGAGGAACAAGGGGTTACCTTGCACCTGAATGGATCAGTGGCGTGCCCATAACGGCGAAGGCAGATGTATTCAGCTATGGCATGATGCTCCTTGAAATCATATCAGGCAGGAGAAATGCTGATCATGGAGAGGAGGGCAGGTCCACTTTCTTCCCAACCTTGGCTGCCAGCAAGCTCCATGAAGGGGATGTGCAGACATTGTTGGACCCTAGGCTGAAAGGGGATGCAAATTCTGAGGAGCTCACAAGAGCTTGTAAGGTTGCTTGTTGGTGCATCCAAGATGATGAAAGCACTAGACCCACAACGGGTCAGATCGTCCAAATCCTAGAGGGGTTTCTGGATGTGAATATGCCTCCCATTCCCAGGTCACTGAGAGCTCTTGGTGAAAGCCCTGATGTCATAAACTTCTTCTCAGATCTGTCTTCAAGCCAGACTTCCCAGACACAAAACAGCACAACAACTTCTCAGACACACAGTGCTACTTCAGGCAGTTCACATTTCCATAGTTCTTAA
>HvleckRLK12
GACACCATCAACTCCACCACACCCTTGTCCGGGTCACAGAAGATCTTGTCCCAGGGCAACAAGTTCACCGTGGGCTTCCACTCCCCATCGCAGAGTAACACCGCCTCTTCCACCTCCAGCAGTTACTACATAGCCATATGGTACAGCAACATACCACAGGTAACCACCGTGTGGAACACCGACAAGCCGGTGTCCGACCCGGCCACCGCCTCCTTGGAAATCGCCCGCGACGGCAACCTTGTCCTCCTTGATCAAGCCAAGAACCAGCTGCTATGGTCGACCAATGTAAGTATAGCCTCCAACTCCACCATGGCCACCATCAGGGACAGCGGTAGCCTCGAGCTCACCGATGCCTCCAATTCATCGATAGTTTATTGGCGAAGCATAGACCATCCCACAAACACCTGGCTTCCGGGGGGCAAGCTCGGGCTGAACAAGACCACGGGTCTGAGCCAGAGACTTCTTCCTTGGAAGAACAAAGAAAACCCATCTCCTGGGTTGTTCTCTCTGGAGCTAGACCCCAATGGCACAAAACAGTACTTCATCCAGTGGAATGAATCCATAAACTACTGGACCAGTGGCCCCTGGAACGGCAATATCTTCAGCCTCGTGCCAGAGATGACGGCCAATTTCAGATACGACTTCCAATTCGTCGACAATGCCACAGAAAGCTATTTCTACTACTCAATGAAGGATGATACAGTCATCTCGCGGTTCATCATGGACGTGACCGGACAGATCAAGCAGCTGACATGGGTGGAATACTCACAGCAGTGGATCTTGTTCTGGTCACAGCCACGGACGCAGTGTGAGGTGTATGCACTCTGTGGGGCATACGGCAGCTGCAGTGAGGCTGCGCTGCCGTACTGCAACTGCATCAAGGGGTTCAGCCAGAAGGTCCAGAGTGATTGGGATCTCGAGGATTACAGGGGTGGGTGCAAGAGGAACGTACCATTGCAGTGCCAGACCAACTCGACCTCCGGGCAGACCAAGCCTGATAAGTTCTATACCATGGCAGGCGTGAGGCTACCTGACAATGCTCAGAGGGCAGTGGGCGCCAGCTCGAAAGAATGTGAGCAGGCTTGTCTGAAAAGCTGTTCATGCGATGCTTACACTTACAATACCAGTGGCTGTTTTATTTGGTCTGGGGACCTGGTGAACCTCCAAGAACAGTACAGTGGAAATGGAGTTGGCAAACTCTTCCTCAGGCTTGCAGCGTCCGAGCTGCAAGACCCAAAAAGGAAGAAGGCAACAATCGTTGGTGGAGTTGTTGGTGGAGTTGCTGCAATTCTGATAATCCTTGCAATTGTGTTTTTCTTCGTATATCAGAAGTTCCGCCGAGAAAGGACTCTTCGAATATCAAAGACTGCTGGCGGCACATTGATTGCTTTCAGGTACAGTGATCTGCAGCATGTCACCAAAAACTTCTCAGAGAAGCTGGGGGGAGGTGCCTTCGGCTCGGTGTTCAAAGGGAAGCTCCCAGATTCAACTGCCATTGCTGTGAAGAGGCTCGATGGGTTTCATCAAGGGGAGAAGCAATTCCGTGCTGAGGTGAGCACGATTGGGACAACCCAGCATGTTAATTTGGTCCGCCTTCTTGGGTTCTGTTCTGAAGGATCAAGGAGGCTGCTTGTGTACGAGTACATGCAAAAAGGCTCCTTGGAAGTGCAACTCTTCCCTGGTGAGACAACTGCTTTGAGCTGGGCCGTAAGGTACCAAATTGCACTTGGAACAGCAAGAGGCCTAAACTATCTGCATGAAAAATGTAGGGATTGCATCATACACTGTGATGTCAAGCCAGATAACATTCTCTTGGATGATTCCTTTGTACCCAAAGTATCCGACTTTGGTCTAGCAAAGCTCTTAGGCCGGGACTTCAGCCGTGTTTTAACGACAATGAGAGGAACAAGGGGTTACCTTGCACCTGAATGGATCAGTGGCGTGCCCATAACGGCGAAGGCAGATGTATTCAGCTATGGCATGATGCTCCTTGAAATCATATCAGGCAGGAGGAATGCTGATCATGGAGAGGAGGGCAGGTCCACTTTCTTCCCAACCTTGGCTGCAAGCAAGCTCCATGAAGGGGATGTGCAGACCTTGTTGGACCCTAGGCTGAAAGGGGATGCAAATCCTGAGGAGCTCACAAGAGCTTGTAAGGTTGCTTGTTGGTGCATCCAAGATGATGAAAGCACTAGACCCACGACGGGTCAGATCATCCAAATCCTAGAGGGGTTTCTGGATGTGAATATGCCTCCCATTCCCAGGTCACTGAGAGCTCTTGGTGAAAGCCCTGATGTCATAAACTTCTTCTCAGATCTGTCTTCAAGCCAGACTTCCCAGACACAAAACAGCACAACAACTTCTCAGACACACAGTGCTACTTCAGGCAGTTCACATTTCCATAGTTCTTAA
>HvleckRLK13
ATGGCTCATGCCACCTCGGCAGCGCTCGCGCTGCTCATCTTCCTCCTTTGCCGGCACGTCCACGTCGATGCGGCGACGACGCTGTTGCAAGGGCAGTCGCTGGCGGGTGACGATAAGCTCCTGTCGGCCAACGGCGCCTTCTCGCTCTCCTTCTTCTCGCCTTCCGGCGGCGACGGCACGCGGTTGTACCTCGGCGTCATGTACGCCAAGGCCGCGGAGCCGACCGTGCCGTGGGTTGCCAACCGCGAAGCGCCGGTGAGCGCCGCGGCGTCGTCGTACGCCGCCACCGTCACCGACTCCGGAGACCTCCGGGTGCTGGAGGGGGAGCGCATCGTGTGGCAGACCAACACGACCTCGTCGGTGGGGAACTTCACGCTGACGATCCAAGACACGGGGAACCTCGTGCTGGCCGGCGGCAGCGGCGCGCAGGCGGTGCAGCTCTGGCAGAGCTTCGACTACCCGGCCGACACCTTCCTCCCCGGGATGAAAATCACGCTGGCCCGGCGCGACGGCGCCGTCGTCAGTCAGACGCTGTTCCGGTCGTGGAGGAGCCCCGACGACCCGGCCCCCGGCAACTTCACGCTCGGGCAGGACCCGCTGGGCTCGGCGCAGCTCTACATATGGCGCCGCAGCGAGGATGGCAAGAACGTCACGCACTGGAGGTCCGGGCAGTGGGCCAAGACCAGCTTCGTGGGCATCCCATGGCGGCCGCTGAATCTGTACGGCTTCCAGCTCTCCGGCGACCTGTCCCAGAGCAACGGCCAGTACTACACCTTCCACATCTTCAACTCCTCGCAGTACAGGTTCATGCTCCAGCCCAACGGCACGGAGACGTGCTACCAGCTCGTCGATGCCACCGGCGCCTGGGAGGTCGTCTGGTCGCAGCCGACGGTGCCATGCCAAGCCTACAACACGTGCGGCCCCAACGCCGAGTGCTCCGCCGACGACCACTGCAGCTGCCTTAAAGGTTTTGAGCCGAAATCCGAAGCGGAGTACGGCGACGGGGTGTGGGCGCAGGGGTGCGTGAGGAGCAGCCAGCTGACCTGCAGCGAGCGAAACGTGAGCATGAGCGGCGGCGACGCGTTCGCCGTCCTCGCCGGCGTGAAGCTGCCGGACCTGGCAGCGTGGGAGTCGGCGGTCAGCAGCGCGGACGCGTGCATGCAGTGGTGCCTGGCCAACTGCACGTGCAACGCGTACAGCTACAGCGGCGCCACCGGGTGCTTGACCTGGGCCCAGGAGTTGGTGGACGTCTACCACTTCCCCGACGGACAGTTCCCCAACGGACAAGGATATGACCTGCACATCAAGGTCCCCGCTTCGGTATTAGATTCAGGCTCCAAACGGAGGACAAGGGTTATTGTTAGCGTAGTGATCGTCCTGGCGGTTGTACTGGCCGCATGCGGCTTTGTCCTGTGGAAATGCAGAAGAACAATCAGAGAGAAACTCGGCGTCGGTGGCGGGAAAAAGAGGACGGGAGCCTCACTGATGCTGCGTCCTGCTGCGATGAAAGCCAAGCATGACTTCTCAGGGCCGAAGCAGCCCGACCAGGACGAAGCGGAGAACGGCGATGGCTGCGAGCTGCCGCTGTTCACTCTCGAGACCTTGGCGGCGGCTACCGGCGGCTTCAGCGAGGCCAACAAGCTCGGGGAGGGAGGGTTCGGGCACGTGTACAAGGGGAGCCTCCCCGGCGGCGATGAGGTGGCGGTGAAGCGGCTGTCGAGGAGCTCCGGGCAGGGTTGCGAGGAGTTCAAGAACGAGGTGATACTCATCTCCAAGCTGCAGCACCGCAACCTGGTGAGGATCCTGGGGTGCTGCATCCATGGCCACGAGAAGATGCTGGTGTACGAGTACATGCCCAACAAGAGCCTCGACGCCTTCCTCTTCGATCCGGCGAGGCGGGGGCTGCTGGACTGGAAGACGAGGCTCCACATCATCGAAGGGATCGCGCGGGGGCTGCTGTACCTCCACCGGGACTCGAGGCTCCGCGTGGTGCACCGGGACCTCAAGGCCAGCAACATCCTCCTGGACAATGACATGAACCCCAAGATATCCGACTTCGGCATGGCCAGGATCTTCGGCGGCGACAAGAACCAGGAGAACACCAACCGCGTCGTCGGCACACTAGGCTACATGTCGCCGGAGTACGCGATGGAGGGCCTGTTCTCGGTGAGGTCCGACGTGTACAGCTTCGGCATCCTGATCCTGGAGATCATCACCGGCCAGAAGAACAGCAGCTTCCACCACATGGAAGGCTCACTCAACATCGTAGGCTACGCGTGGCAGATGTGGAACTCGGACAAGGGGGAGCAGCTGATCGACCCGTCGATCCGGGCGTCGAGCTCGGCGTCGGCGTCGCGGGAGGCGCTACGGTGCGTCCACATGGCGCTGCTGTGCGTGCAGGACCACGCCGGAGACCGGCCGGACATACCGTATGTGGTGCTGGCGCTGGGCAGCGACAGCTCCGTGCTGCCGATGCCGAGGCCGCCTACGTTCACGCTGCAGTGCACGTCCTCGGACAGGGACGGGTTCAGAGGGAAGGCCGACGAGTCCTACTCCACCAGCGACCTCACCGTCACCATGCTCCAAGGGAGGTAG
>HvleckRLK14
CGAGCAAACCCAGCACCCACCCTACTACACAGCAGCTGCGGTCTCTGCAACTGCAAGCTACCCCTCTCCCTCGGTTGGTTCACCATGCCTCTCCTCCTCTTTGTCTTCACCGCACTCTTCGCCTTACACGCCGTCCCTGCGAATTCTGCCACGACGGACGCCATCTCCGCCGCACAACCGCTCGTCGGCGGTGACAAGATCGTCTCCCGGAATGGCAGGTACGCTCTCGGCTTCTTCGAGACCGGCGGCGACTCCAACTGGTACATGGGCATATGGTTCAACACAGTCCCAAAACTTACTCCGGTGTGGGTTGCAAATAGGGACGACCCAATCAAGAACATCACCTCACTGGAGCTCACAATCTCCGGGGATGGCAACCTTGTCATCTTGAACAGGTCTAGCAGCTCCATAATCTGGTCTTCTCAAGCAAGAGTCACAACCACTGACACCATTGCCGTTCTCCTGAACACTGGGAATCTCGTCCTGCAGGAGAGCTCTCCAAGCTCATCAGATGTTTTCTGGCAGAGCTTTGACTACCCCACGGACACGTTTTTGCCCGGGGCGAAGCTTGGGTATGACAAGGTCACCGGCCTTAATCGCCGCCTTGTTTCTTGGAAGAACTTGATCAACCCAGCCACTGGAGCATACCATGAGGAGTTAGACCCCAGCGGTCTCGACCAGTTCCTCCTTGCACCGCTGAACTCTTCCATACCGTATTGGTACAGCGGTGCCTGGAACGGCCAATACTTTGCCTTGATGCCAGAGATGTCAAACGGCTATTTTATAAATTTCACATTCGTCGACAATGACCAAGAGAAGTACTTCATGTATACCTTGCATGATGAAACCACCGTTATCCGTAATTATTTGGACCCCTTGGGTCAGGCAAAGACGAACCTTTGGCTAGAAAGCTCACAGAATTGGATGGTGATGTTTGCCCAACCCAAAGCTCAGTGTGATGTCTACGCAGTTTGTGGACCTTCCACCATTTGCGATGACAACGCGCTGCCATCTTGTAACTGTATGAAGGGCTTCGCTGTGAGATCACCGGAAGACTGGGGACCAGGTGATCGAACCAGTGGGTGCTTGAGAAACACTCCATTAGACTGTAGCAACAGAAGCACAAGTTCGACAGACAGGTTCTACCCCATGCCATGTGTTAGATTGCCCCAGAATGATCCTAGCAAGCGAGCTACTGCTGGTTCTGATGAGTGTGCACAGATCTGCCTGGGTAACTGTTCTTGTACTGCATACTCCTTTGTGAAGGGCGAATGCTCTGTTTGGCACGGCGAATTGCTTGACTTGAGACAGCATCAATGCAGTGGCACTTCCAGCACAAATGGAGAGACTCTTTACCTTCGCCTTGCCGCGAAAGAATTTCCCAGTCAGCAGGCTAGCAGAAGAGGAAAACCCAATGTAATACTTATCATCTGTGCAACTGTTGCTTCTTTAGGCTTGTTAGCAGCACTGGTCCTACTAATCATGATTTGGAGGAACAGAACAAAGTTATCTGATGGAACACTGAAAAATGCTCAAGGTGTCAATGGTATTACCGCGTTCCGGTATGCCGATTTGCAACGCGCAACTAAAAGTTTCTCTGAGAAGCTCGGAGGAGGCAGCTTTGGTAGTGTGTTCAAGGGGTCTCTGGGTGACTCGACAACCATAGCAGTGAAAAGGCTTGACCATGCTAACCAAGGAGAGAAGCAATTCAGGGCGGAGGTGAGCTCCATCGGGATCATTCACCATATCAATTTAGTCAGATTAATTGGTTTTTGCTGCGAAGGTAGTAGGAGGTTACTTGTTTATGAGCACATGCCAAATCGGTCCCTCGATCTCCATTTATTCCAGAGCAATGCCACAATGCCATGGCATGCCAGATACCAAATCGCCCTTGGAATTGCTAGAGGATTGGCCTACTTGCACGACAGCTGCCAAGACTGCATCATACACTGTGACATTAAACCAGAAAACATCCTCCTTGACGCTTCATTTGCTCCGAGGATAGCCGACTTCGGGATGGCCAAGCTTATGGGAAGGGATTTCAGCCGGGTTCTGACCACGGTGAGAGGAACTGCGGGGTACCTCGCGCCTGAATGGATCAGCGGCGTGGCGGTCACAACAAAAATCGATGTCTACAGCTACGGCATGGTGTTGCTGGAGATCATATCTGGGAGAAGAAATTCTTGGGCACCGTGTTCTTGCGGCGGCGAACATGGTGTTTATTTCCCTGTTAAAGTTGCACAAAAGCTTCTCGAAGGCAGCGACGTCGGTAGCTTGGTGGATCACATGTTGCATGGCGATGTCAATCTGGATGAGGCTGGAACAGCTTGCAAGGTTGCGTGCTGGTGCATCCAAGATGATGAGTTTGATCGACCGACAATGGGAGAAGTAGTTCAGATTCTCGAGGGTCTGGCTGAGATCAGTGTGCCCCCGATGCCAAGGTTACTTCAAGCTATGAGCGGCAGGGGAAGTTCACATTCGATATGTTCCTAA
>HvleckRLK15
CTCCCCGTCCTGCTCGCCCTGCTCTGCGCCCTACACGCTCCCGTCAGCTCCGCGTCCACGGTGACCTACTCCCTCTCGCCAGGCCAGTCGATCGCCGGCGACGACAAGCTCGTCTCCAGCGGCGGCAAGTTCGCGCTCGGCTTCATCCAGATCCCAGGCATCGACAGCAACCCCTCCGGCTCCGGCGGCAACAACAACACTCAGCTAGGCATATGGTTCAACCTTGTTCCCAAGCTGACACCGGTGTGGGTGGCCAACAGTGGAGGCAGCCCGGTGGCAGGCGCCCGCTCGCCGGAGCTCACGATCTCCGGCGACGGCAACCTCGTCATCGTGGACCGCGGCAATGTCGCTTGGTCCACCCGAGCCGACGTCACAGCCAGCAACAACAGGACGGTCTTCCTTCTCCTGGACACCGGGAACCTCGTCCTGCGCAGCGCCTCCAACGCCTCCGACGTGCTGTGGCAGAGCTTCGACCACCCCACGGACATTCTGCTCCCCGGCGCTACCATCGGGCTGGACAAGGTTACCGGCCGGAGCCGCCGTCTCGTCTCCCGGAAGAACCGGATTGACCAGGCTCCGGGCCTCTACTCCATGGAGCTGGGCCGCAGCGGCGTCGTCCGGATGCTGTGGGACTCGTCCGTGCCGTACTGGTCCAGCGGGGAGTGGAACGGCGAGTACTTCAGCTCGGTGCCGGGGATGACCGCCCGCCACCTGTTTGGCTTCACGTTCGTCAACGACGACCGGGAGGTTTCCTTTGCCTACCACCTGCTCGACGAAACGATCACCATGTATAGCTTCCTGGACGTGTCCGGGCAGAGGAAGGTGTTGGCCTGGCACCAGGCCACGCAGAACTGGGCGACAGTCTACACCCACCCCACCGCGCAGTGCGAGGTGCACGCCGCCTGCGGGCCATTCACGGTCTGCGGCGACTACGCGCCCCCGCCTTGCAGCTGCATGAAGGGATTCTCCGTGGATTCGCCCGATGATTGGGACCTTGATGATCGAAGCACGAGCGGATGCAGGAGGAACACTCCACTGAATTGTGCTAGCATTAGCAACAGCACTATGGTTGGCCTGGCTGACATCTTCTATGCCATGCCGGCCGTCAGATTGCCCTATAATCCCCACAGCGCCGTGGGACGTGTCACCAGCGCAGGCGAATGCGAGCAGCTTTGTCTGAGCAACTGCTCTTGCACTGCATATTCCTTTGGAACTGGTGGTTGTTCTATGTGGCATGGTGGATTGCTGAATGTAGAACAACACCAAATTGATGATGCTTCCAGCGGCGATGGAGAAATTCTTTACGTCCGCCTCGCAGCAAAGGAGTTCGGGACTCGGAAAAACAACACTGTGGTTATCATTTTAGGTGCCATTGCTGCAAGCCTCACCGCTTTGGGTATCTTGGTACTCACCGTAGTGCTACGCAGGACCAGGAGGAACAAATGGTACAGTCGAACATTAGACAACATCCATGGTGGTAGTGGGCTTGTTTCATTCAGATACAGCGATTTGCGGCGCGCAACTAGAAATTTCTCAGAAAAGATTGGGGCAGGTGGTTTTGGTTCTGTGTTCAAGGGGTCGTTAAACGATTCGACCACTATAGCGGTGAAAAGGCTTTATGGTTGTTATCAACAAGAGAAGCAATTCAGGGCTGAGGTGAGTTCAATTGGAATCCTCCACCATACAAATTTAGTGAAAATGGTTGGTTTTTGTTGTGAGGGTGACAAGAAGCTCCTTGTCTACGAACACATGCCAAATAGCTCCCTTGATGCTCATCTGTTCAGAAGCAGTGCCGAAACGCTGAATTGGAGAACCAGATACCAAATAGCTCTTGGAGTTGCCAGGGGGCTAGCATACTTGCACGAGAGCTGCCTGGACTACATCATACACTGCGATATAAAGCCGCAAAACATACTTCTTGACGCGTTGTTCGTTCCTAAGATCGCCGACTTTGGGATGGCAAAGCTTCTCACAAGGGATTTTAGCCGGGTTGTGACCACAACGAGGGGCACATTTGGGTACCTGGCCCCTGAATGGATCAGTGGGGTGGCTATCACGCCCAAAGTCGATGTGTATGGATATGGGATGGTGCTACTGGAGATCATATCCGGGAGGATGAACGCAAACGGAGAATGTGGCAGCAGTGGTGATGACATTGTTTATTTCCCCATCCAGGTGGCACGCAAGCTTCTCGAGGGAAATGTCATGAGTTTTGTGGATGATAGGTTAAACGGTGATGTCATCGTCGACGAGGTTGAAAGGGCTTGCAAGGTTGCCTGTTGGTGCATTCAGGACAGGGAGTTTGAACGGCCAACGATGGGCAAGGTAGTCCAGATTCTTGAGGGTCTTGTTCAAGTCGACACCCCTCCGATGCCTAAGCTACTCGAAGTTATCGCCGGAAGATCAAATTCAGCTTGCACCTAA
>HvleckRLK16
ATGGCATTCACATTCTTCTCCATGCCTCCCCTCTGCATATTATTACTCGGGCTTCTCCTCTTGCACACTACTCCCTGGTGCTCCTCCTCTGCAGCTGCAACCAATGACACTCTCATGGCAGGCCAAGAGCTGGCCTTCGGTGACAAGCTCGTCTCGAGAAACGGCAAGTTCGCGCTTGGCTTCTTCCAGTTCCATCCAGCAAGCACCATCAGTAAGTCATCCCACAACACCACATCTCCCAGCCCCAGCCCGTGGTACCTTGGCATATGGTTCAATAAGATCCCAGTTTTCACAACTGTATGGATTGCTAATAGGGATCAGCCCATCACCAACCCCCATGTCACCATAGCACAGCTCAAGATATCAAGAGATGGCAATCTTGTCATAGTAAACCATGCCGCCAACAATGAATCCATTGTTTGGTCCACTCACATTGTCAATAATAGGACACATAGCAGCATCAATGCCCCTAGTTCTGCCGTTCTCTTGAAGAGTGGAAACCTTGTCCTCAAAGAGAGCCGGTCATCTGACCTACTGGCATGGCAGAGCTTCGATTACCCAACAGATGTTGTGCTTGCTGGTGCCAAGTTAGGCCGAAACAAGGTCACCGGTTTCACTCGCCAACCCATCTCAAAGAAAAGCCTCATTGATCCGGGGCTTGGCTCATATAGCATTGACTTAGAAGACACCAGGGGGCTTGTCCTCAGTCGCCGCCACAACCCATCCGTAGTGTATTGGCAGTATGCATCCTCTACAACATCATCATTCAATCTTGTACGAGTACTCAATTCACTGCTTGATTCGAATTCTCTGACCAAAGGTTTATATAACCTAGTATATGTTGATAATGAACAAGAGGAGTACTACATGTACACTTCACATGGTGAATCGTCGCCTTCTGTATTTGTCTCACTAGACATGTCTGGTCAGATAAAGCTGAATCACTGGTCGCAAGCTACTCGGTCTTGGCAAATCATATATGCCCAACCTGACGATCCCTGCAACCCGCCTGCTGCCTGTGGACCTTTTACAGTGTGCAGAGGCAATCCAAATCCATCATGTGACTGCATGGAGAGCTTCTCTCAGAATTCGCCGCAGGATTGGAAGTTTCAAGATCGAACAGGAGGATGCATCAGAAATACACCTTTACATTGCACCAGTGACAAAAACATCACAAGTTCAACAGACATGTTCCAGCCCATTGCTCAAGTTACATTGCCCTACAACCCACAAATCATAGCCGTTGCTAGCACTCAGAGCGAATGCGAAGAAACTTGTCTCGGTTCCTGCTCCTGCACTGCTTATTCCTATAAGGATAGCAAATGCTCTGTCTGGAATGGGGAGTTGCTTAGTGTAACTCGTAATGATGGCATTGAATACATTTCTAAAGATGTTATTTATCTCCGTCTTGCTGCCAAAGATTTCATACCAGGTTTGAGGAAAAACAAAAGAAAACCGAACGTTGGAGTTGTTACCTCTGCAAGCATTATTGGTTTTGGGTTACTCATGCTCATGTTTCTGTTACTGATTTGGAGGAACAAATTTAAGTGGTGGTGGTGTTGTTTCCTTCCATTATACTATGACAATCAAGGCAGTGTTGGTGGGATTGTTGCCTTCAGATATACTGATTTAGTTCGTGCTACCAAAAACTTCTCTGAGAAGCTGGGTGGTGGAGGTTTTGGTTCTGTGTACAAGGGGGTGTTAAGTGACTCGAAGACTACTGTAGCAGTGAAAAGGCTTGATGGTGCCAGTCAAGGTGAGAAGCAGTTCAGGGCTGAGGTGAGCTCAATTGGACTGATCCAACATATCAACCTAGTAAAATTGGTTGGTTTCTGCTGCGAAGGTGATCACAGATTACTTGTGTACGAGCACATGTTAAATGGTTCTCTTGATCGTCATCTGTTTAAGAAGAGCAATAATGTTGATGTTGTTGTGCTAAACTGGAACACCAGATATCAGATATCCCTAGGAATTGCTAGAGGGTTGTCCTACTTGCATCAGAGTTGTCGTGAGTGCATTATACACTGTGATATTAAGCCAGAGAACATACTTGTGGATACATCATTTGTTCCTAAAGTTGCAGACTTTGGATTAGCAGCATTTGTGGGGAGGGATTTTAGCCGAATTCTGACTTCATTCAGAGGAACTATAGGTTATCTTGCCCCAGAGTGGCTTAGCGGAGTGGCGATCACACCGAAAGTCGACGTTTATGGCTTTGGCATGGTACTGTTGGAAATTATATCAGGAAGGAGGAATTCCTCACCTGAAATATCACATAACACTAAAAGCTGCAGCAACAGTTACCAACATCATGAATATTTCCCTGTGCAAGCCATCAGGAAGCTTCACGGGGGAGATGTGAAGAGTTTAGTGGATACACAATTGCATGGTGACTTCAATTTGGAAGAGGTTGAAAGGGTTTGCAAAGTTGCATCTTGGTGCATCCAAGATAATGAGTTTGATCGTCCGACGATGAGTGAAGTGGTCCATGTTCTCGAGGGTCTACAGGAGATTGATATGCCCCTGATGCCAAGACTCCTTGCAGCCATAGTGGAACAATCTCATGCTGCAACTTCAATGTAA
>HvleckRLK17
ATGCGATGGCCGTCCAATTTCAGTTTTACCTTCTATATCTGCAGCCGAATGGTTCTGAGGAGGAGACCACATGCCCCTCAACTAGTTCCTTGCTGCCGGGAGTTGAAGAAGATGGGCTTTAGGGGCAAGTCTTGCATTCCACTTTTGACCCTCCTATTGCTGAGTTCACTCTGCAAATCCGATGACCAGCTCACACACGCAAAGCCGCTCTCCGCCGGCGACACCATCGTCTCCAAGGGCGGGCACTTCGCGCTCGGCTTCTTCCCCTCAAACAGCCCCAACACGAGCCTGTACCTCGGCATATGGTACCACAGCATCCCTGGCCGTACCATCGTATGGACCGCCAACCGCGACAATCCAATCGCCGCCACTTCATCTCCGACGCTCGCCATCACCAACAGTTCCGGCCTGGTGTTGTCTGACTCCCAAGGCCGCACTCCTTGGGCAGTGAAGAACGACATCACGGGCACGGGAGTTGCTGCGGTGCTGCTTGACACGGGGAACTTTGTCCTCCTCTCTCCAAATGGCACACGCATATGGCAGAGCTTTGATCACCCGACAGACACCATTCTACCCGGTACTAGGATCTACCTGAGAGAGAAAAAAGACAAGGGTCTCGTTGCCAGGCGCCTAATTGCTTGGAAAGGCCCCATTGACCCATCCACTGGAGATTTTTCGTTGGGCCTTGACCCCAACAATTACATTCAGTTAGTCATTTGGCACGGGACTATGCCCTACTTCCGTCTCAATGTTCTTGATTATGCGTCGGTAGCTGGTGCCGTATACCAGAACACTGTCTTCTATGAAGCGTTTGGTGGAACAAGCACCGACGGGTTCTATTATGAATTCTCTGTTTCTGGTGGCTCACCGTATGCACGCCTTATGCTCGACTACATGGGTGTGATGAGGACTCTTAGCTGGAACAACCACTCATCTTGGACAACCGTCAACGCTTATCCCTCTAGCAGCTGCGAGCTCTATGCTTCATGTGGCCCGTTCGGGTATTGTGACAACACCGGGGCTGCCGCGACATGTCGTTGTCTCGATGGGTTTGAACCCGCTGGTCTTAACTTTTCGAGCGGATGTACAAGAACCAAGGAGCTGGAATGCGGCAAGCAAAGTCATTTCGTGACCTTGCCTAAGATGAAGTTACCTGACAAGTTTTTACATGTCCTCAACACAAGCTTTGACGAATGCACGGCCGAGTGCAACAACAATTGCTCGTGTAAAGCCTACGCCTACACCAACTTGAGCAATAACAGTGCTATGGCCCAACAGTCAAAGTGCTTGCTTTGGACAGGGGATCAGCTTGTCGATACAGGGAAGTATAGTAATATCGACGAGATCTTGTACCTCCGGCTTGCCAACTCTCCTGTTCAAAATGGCAAATTGGTAAAGATTATACTCCCAACCATGGCTTGCGTGTTCATACTCGCGTGCATAGCCCTTGGGATATACAAATGCAAAGGTAAAATAAAAAAAGGTCTCTATTGTCAAGATTGTACTTCATTTTTGTAA
>HvleckRLK18
ATGGGTGGCTCCATCCTCCATGCAGCCGCTTGGTGGAAGCTTCCTCCTTGGTGTGCAATATTGCCTTATATTATGGAGTACTCCTCGGTGGAAGCACATAAACGGTGCTGGCTAGCACATGGTTTTATGGCAATACTGCCTTGTATTATGCCTAGAGATGCCTCCAATGAGCGGTCAATTATCCAGTCCAAGTGGCAGCCCAAGTGGATGCGTAGTACTGCTGTCCTAGTCACCAATCTGGACTGCCCTGCTGCAAGCGATACTCTCACGTCGGGCCAGTCGCTCGCTGTCGGCGGCAGCAAGCTCGTCTCGAGGAACGGCAAGTTCGCACTCGGCTTCTTCCAGCCAGCAGCAGGCACCATCAGTAAGTCCCAGAACACCTCCGGCTCCAGCTGGTACCTTGGAATATGGTTCAACAAGATACCAGTTTTTACTGTCGTGTGGGTTGCCAATAGGGATCAGCCCATCACCGGCCCCAGCCTCAGCCGAACAAAGCTGCAGATATCAAACGATGGCAATCTTGTCATTGTACACAATGATTCCGTACTTTGGTCCACTCACATTGTCAATAATAGGACACAAGCCAGGGGCATAAACACCACTGCCAGTGCGGCTGTTCTCTTGAACAGTGGAAACCTTGCCCTTACAGTCACAGAGAGCCCATCATCATCGGACCTACTGTTGTGGCAGAGCTTCGATCACCCAATAGATATTGTGCTTCCTGGTGCCAAGTTTGGTCGAAACAAGATCACCGGTTTGAACCGTAAGGGCGTCTCAAAGAAGAGCCTCATTGATCAGGGTCTCGGCTCATACAGCGTTGAACTAGACACCAGCGGGCAGGTCGTCCTCAAGCGCATAAACCCCTCAGTCGTGTATTGGCATTGGGCATCCTCCAAAACATCATCATTGAAGCTTATACCAATACTCAAGTCCATTCTGGATATAGATCCACGGACCAAAGGTTTGATTAACCCAGCATATGTTGATAATGACCAAGAGGAGTACTACATGTACACCTCACCAGATGAATCATCTTCCACATTTGTCTCACTTGACATCTCTGGTCAGATAAATCTGAATGTTTGGTCGCAGGCCAGCCAGTCTTGGCAAACCATATATTCCCAGCCTGTCGATCCCTGCACTCCGGCTGCTACCTGCGGACCTTTCACAGTCTGCAATGGCACTGCACAGCCATTCTGTGACTGTATGGGGAGCTTCTCTCAGAAGTCACCACAGGATTGGGTGTTTAATGATCGAACAGGAGGGTGCATCAGAAATACACCGTTACAGTGCAACACTAGCAGTAACAACAAAAATATGACAAGTTCAACGGACATATTCAACCCCATTACTCAAGTTACGCTGCCCTACAACCCACATAGCATAGACGTTGCTACCACACAGAGCAAATGCGAAGAAGCTTGTCTCAGTTCCTGCTCCTGCACTGCTTATTCATATAACAACAGCAGATGCTCTGTCTGGCATGGGGAATTGCTTAGTGTAAATCGGAATGATGGCATCGATAATGTTTCTGAAGATGTTCTATACCTCCGCCTTGCCGCCAAAGATTTGCTGCCAAATTTGATGAAGAACAAAAGAAAACCAAACGTTGGAGCTGTTACCGCTGCAAGCATTATTGGTTTTGGGTTACTAATGCTCATGGTGTTGTTACTGATTTGGAGGAAGAGAGTTTGGTGGTGTGGTTTGCCTTTGTACAGCAATGAAGGTAGTTCTGCTGGGATCATAGCCTTCAGGTACACTGACTTAGTTCGTGCTACTAAAAACTTCTCAGAAAAGCTGGGAGGAGGTGGTTTTGGTTCTGTATACAAGGGAGTGTTAAGTGACTCGAAGACTACCGTAGCAGTTAAAAAGCTTGATGGTGTCAGTCAAGGAGAGAAGCAATTCAGGGCTGAGGTGAGCTCAATTGGACTGATCCAACATATAAACCTTGTCAAATTGATTGGTTTCTGCTGCGAAGGTCATCACAGATTACTTGTGTACGAGCACTTGTTCAATGGATCTCTTGATAGTCATCTATTTAAGAAGAGCAATAATGCTGATGTTGCTGTCCTAAACTGGAACACCAGATATCAGATAACCCTAGGAGTTGCCAGAGGGTTGTCCTACTTGCATCAGAGTTGCCGCGAATGCATCATACACTGTGATGTTAAGCCAGAAAACATACTTGTGGACGCAACCTTTGCTCCCAAAGTTGCAGACTTTGGATTGGCAGCGTTTGTGGGGAGGGATTTTAGCCGAATTCTGACCACATTCAGAGGAACTGCAGGTTATCTTGCCCCAGAGTGGCTTACTGGAGTTGCTATTACACCAAAAATCGATGTTTACGGCTTCGGCATGGTACTGATGGAAATCATATCCGGAAGCAGGAATTCACCTGAAACACACAACACTAGCAGCAGCACCAGTTACCACGCTGAGTTTTTCCCTGTGCAAGCCATTAACAAGCTTCATGGAGGAGATGTGAACAGTTTGGTGGATCCACGGTTGCATGGTGACTTCAATTTGGAAGAGGCTGAAAGGGTTTGCAAAGTTGCATGTTGGTGCATTCAAGATAATGAGTTTGATCGGCCGACGATGGGTGAAGTGGTCCGGGTTCTCGAGGGTCTGCAGGAAATTGATGTGCCCCCGATGCCAAGACTGCTTGCAGCTATAACGGTGCAACCTGGTGCTGCATATTCAGTGCAATTATAA
>HvleckRLK19
AGTCTAATGGATATGCACTACATTCTCATCTTCTTCCTCATATTTTTGAGCTCGTTCTGCAAGCCCAATGACCAGCTCACACATACAAACCTCCTCACCCATGGTGACATGCTCGTCTCCAAGAGCGGGGACTTTGCTCTCGGCCTCTTTTCCCCGACGAGTTCTAACAAGAGCTTTTACCTTGGCATATGGTACCACGGCCTCCCCGGACCACGGACCGTCGTGTGGGTCGCCAACCGAGACAACCCAATCATCAACCCTTCGTCTGCGATGCTCACCATCAACAACAATTCTTGCATGGTATTATCAGACTCCGAAGGCCGCAATATTTGGATGACATCAAACAATATCACTGTTGGAGCTTATGCAATACTACTCAACTCGGGGAACTTTGTCCTACGGTCATTGGACGACAAGGACATATGGCAGAGCTTCGATCATCCAACGGACACCATTCTTCCAAGCATGAAGGTTTTGGTGAGCTACAAGGGCCATGCTGTCGGGCGCCTTGTTGCTTGGAAGGGCCCGGATGATCCCTCATCTGGGGACTTCTCCTGCAGCGGCGACCCAAGCTCTCCAGACACTCAGTTAGTCACTTGGAACAAGACCAAGCCATATTGCCGCATCAAAGTGTGGAACGGCCTGTCGGTGTCCGGTGGCACGTATCTTGGCAATGGCAGCTCCATCTTGTACCAAACGGTTGTCTACTCCGGAGATGAGTTCTACTCCGTGTCAACAGTCTCCGACAACTCACCGTTCATGCGCATCACACTTGACTACACTGGCAAGATGAAGTCTCTAACCTGGGACAATCATTCATCATCTTGGGCACTCATGGATGAACGCCCTGCTGCCGCATGTGACCTCTATGCCTCATGTGGCCCCTTTAGTTATTGCGACTCCACTCAGATCATATCAGCTTGCCAATGTCTTGAAGGGTTTGAGCCCGTTGACAGTATTGACTTATCTAAAGGATGTCGAAGAAAGCAAGAGCTGAAATGTGGCAAGCAAAGCCGCTTTGTGCCCTTGCCTGGAATGATGGTTCCTGATAAGTTCTTGCGTATACATAATAGAAGCTTCGATGAGTGTGCGGCAGAGTGCGACCGCAATTGCTCATGCATGGCCTACGCTTATGCCAACTTGAGCAGGGCCGGTGTTATGGCAGACCCATCAAGGTGTTTGGTGTGGTCAGGGGAGCTTACCGACATTGGGAAGACAACCACCGGCGAGGACCTGTATATTCGACTTGTCGGTTCTTCTGTTGACAGGAAGATCAGTCTAATAAAGATTGGACTCCCTATTATGGCATGCATGCTACTAGTGACATGCCCAACCCTTGTCTGGATGTACAAATATAGAGGTAAATGGCAAAAGATGGTCAAGCAGAAGAAACTGATGAGAGGATACTTCAGCACATCGAACAGACTCGAAGGCGAAAATATAGAATTTCCATTTGTTAGCTATGAAGAGATCCTTTCAGCAACAAATTGTTTTGCTGATTCCAACTTGCTCGGCCGGGGGGGTTTTGGCAAAGTTTACAAGGTAACCAAAAGTAGTACTTACAATACAATGTAA
>HvleckRLK20
GCTGCGAGCTGCAAAGATATGATGTTCCTCAACTTTCGTGTCATGCTCATCTCCGTGCTCTTTGTTTCCCTAGGAACCACATCGCTTGCCGGTGTTTCATCTCCGCCGGACAAACTAAACGATGGCCGCCGCAACATCACCGACGGCGAGATGCTCGTCTCGGCCGGTGGCTCCTTCACCCTTGGGTTCTTCTCACCGGGCGCACCGAGCCGGAGGTACGTCGGGATATGGTTCTCCGCGTCCACGGACGCCGTGGTCTGGGTGGCCAACCGCGACAGCCCGCTCAACGACACCGCCGGCGTGCTGGCGATCGACGGAGCCGGCCGCCTTATCCTGCTCGACGGCTCCGGCCGGACCGCATGGTCCTCCTCGAACACTACGAACCGTGGCTCTACCTCTTCATTGTCCGCGGAGGCGCGGCTGCTCGAGTCCGGTAACCTAGTGGTGGTGCGCGACGAGAGCAGCGGCGCCGTGCTGTGGCAGTCGTTCGACCACCCGTCCAACACCCTGATCGCCGGCATGCGGCTGGGCAGGAACCCGCAGACCGGCGCCGAGTGGTCCCTCAGGTCCTGGCGCTCCCCGGACGACCCGGCGACGGGGGACTGCCGCCGCGCCATGGACACGAGGGGGCTGCCGGACTGCGTCTCCTGGCGGGGCGACGCCAAGAAGTACCGCACGGGGCCGTGGAATGGGCTGTGGTTCAGCGGCGTCCCCGAGATGGCGTCCTACTCCGACATGTTCACGAACCAGGTGGTGGTCCGGGCCGACGAGGTGGCCTACGTGTTCAACGCGACGGCGGCGGCGCCCTTCTCGCGGCTGGTGCTGAGCGAGGACGGCGTGATCCAGCGGCTGGCGTGGGACGGCGGAAGCCGGGTGTGGAACGTGTTCGCGCAGGCGCCGAGGGACGTGTGCGACGACTACGCCAAGTGCGGCGCCTTCGGGCTCTGCAACGTGAACACGGCGTCCACGCTCTTCTGCGGCTGCGTGCAGGGGTACGTGCCCGTGTCCCCCGCGCACTGGTCCATGAGGGAGGCCGCCGCCGGCTGCCGGAGGAACGCGCCGCTGGACTGCCGCGATGGGGGCGCCGCCACCACGGACGGCTTCGTGGTGGTGCCGGGCGTGAAGCTCCCTGACACTGACAACGCGACGGTGGACGTGGGCGCGACGCTGGAGGGGTGCAGGGCGAGGTGCCTGGCCAACTGCTCCTGCGTGGCCTACGCCGCAGCGGACATCAGAGGCGGCGGCGGAGGCAGTGGCTGCGTCATCTGGGTCGGTCACATCGTCGACGTCCGGTACGTCGACAAAGGCCAGGATCTCTACGTGCGGCTGGCAAAATCTGAACTAGCTGTTAATAAGAAGAGGGGGAGTATGTTGAAGATTTTGCTACCAGTCACAGCATGTCTGCTTGTACTGATGTGCATATTCCTTGTTTGGATATGCAAGTTCAGAGGCAACCGTCGAAACAAGGATGTCCAGGCAAAGTCGATCCTCGGAGTTTCTTCAAACCAACTAATTGGTGATGAAAATATCGAGCTTCCATTGGTTAGCTTTAGAGATATTGTTACCGCCACAAATGATTTCTCGAACGAGAACATGCTCGGACAAGGAGGTTTTGGGAAGGTTTACAAGGGAATGTTGGATGATGACAAAGAAGTTGCTATCAAAAGGCTCAGTAAGAGTTCTGGACAAGGAGCGGAAGAATTCAGAAATGAAGTTGTTCTAATTGCCAAGTTGCAGCATAGGAACCTTGTCAGACTTCTTGGTTATTGCGTTCATGAAGATGAGAGGTTGCTGATTTATGAGTACTTACCAAACAAAAGCTTGGATGTCTTCATTTTTGACACTGAAAGTAAGTATGTCCTTGACTGGCCAACAAGGTCTCAAATAATCAAAGGGGTAGCCAGAGGGCTTCTTTATCTCCACCAAGATTCAAGGTTGACAATAATTCATAGAGATCTTAAATCAAGCAACATCTTATTAGATGTGGATATGAGCCCAAAGATATCCGATTTTGGTATGGCAAGAATATTTGGTCGCGACCAGCAAGAAGCAAACACCAACCGAGTTGTTGGTACATATGGTTACATGTCTCCTGAATATGCGATGGATGGCGCCTTCTCTGTCAAGTCCGATACCTACAGCTTTGGTGTTCTGCTCTTGGAGATCATAAGTGGCCTGAAGATTAGCTTACCTCAGCTCTCAGACTTTCCAAATCTCTTAGCTTATGCATGGAACTTATGGAATGATGGGAAGCCAATGGATATGGTGGACTCTTCCATTATTGATAACTGTTCACCAACTGAAGTTCTACGGTGCATTCATATAGGGCTCTTATGTGTGCAAGATAATCCTTACAATAGGCCACTCATGTCATCCGTTGTATTCATGTTAGAGAACGAAACCACGTCACTTTCAACCCCACAACGACCTGTGTATTTTGCGTATAGGAACTCGGAAGCAAAAGAAACAGGAGAAAACACCAGCAGCTCAATGAATAACATGAGCGTCACGATGTTGGAAGGGCGGTAG
>HvleckRLK21
ATGGGCAAGACCCTTCCTGTCATTTTCACCCTCCTACTGTTGATTTGTTTATGCAAATCCGATGACCGCCTAACACCGGCGAAGCCACTCTTGCCGGGCGACAAGCTCGTCTCAAACAATGGCATTTTCGCTCTTGGCTTCTTCTCCTCGGACCCAGAGAACTCTAGGGCCGCAAACTCTTACTTAGGCATATGGTACCACGACATCCCGGAGAGGACATATGTGTGGGTGGCCAACCGCGACAACCCGATCGGCAGCGGTTTGTCGGGGAAGTTGGTTCTGACAAACACCTCTGATCTCGTCTTGTCAGACTCCAAAGGCCGTGTCCTCTGGAGGACGACGAACAACATCACCACCGGCGGTGACGGGGCCGTGGCGCTGCTGCTCGAGGCGGGGAACTTTGTCCTCCAATTGCGCAATTTCACACAGATATGGCAGAGCTATGATCACCCGACCGACACCATCCTCCCCAGCTTCAAGTTATGGGCCAACTACAAGGTACACACAGCAGTGCGCCTCGTCGCTTGGAAGGGTCCTCAGGACCCGTCCACCGGGATGTTCTTCCTCAGTCGTGATCCCGGCACGGGCCTCCAGGTCCTCACCTTGCGCGGGAGAAGCAAGTACTGGCGCAGCGGGCTGTGGAATGGTGCGGAAGCCTCAGACAAGAACGGGTTCATGTGGTCCCAGATTGTCGATGACGGGGAGACCATCTACTCGACGTACAACACGGGCAACAGCTCCGCCCGGAGGTCGCACTGGAAGCTGGACTACAATGGCGACTTGATGCTGAGGATCTGGAGCGGCCAGTCATGGATGCCTCTGTTCAAGCGCCCAGATTCTGGCTGCCGCCGCTACGGTTCATGTGGTCCGTTCGGGTACTGCGACATGTTCGACAAGATCTGCAGGTGCCTGGATGGGTTCCAGCCGGCAGATGGCTTCGGCGCTATCCCCTCCAGAGGATGCGTGAGAAAGGAGAACCTGACATGCCGTGGTGACCATTTCTTGACTTTGCCGGAGATGAAGGTGCCTGACAAGTTTGTGTATGTGAGGAACAGAAGCTTCGAGGAGTGCACCGCTGATTGTGAGCGTGACTGCTCCTGCACCGCGTATGCTTACACCAACCTGAGCAGTATCGTCGCAACCGGTGGCCCGTCAAGATGCTTGATCTGGACAGGGGAGCTTGTTGACTCTGAGAAGGCCGGTATGCTTGGTGGCAACCTGTACCTTCGGCTTGCTGGCTCTCAAGAACGCAGTCCTGCAGTAAACAACACGAAGAGCGGTGTCGGTGTGGTATTCAAGATCGCACTCCCAGTTATATTTGTCCTGCTGACACTCATATGCATATATCTCGTCTGCATATGGAAGCCAAAAGGGATACAAGTAAAAAATGAAACCCTGAAAAGACCGGCCCTGGAACACTTGGATCAAAATTTGGAATTCCGGTCTATTAGGTTCCAAGACATTGCCACTGCAACAAACAGTTTCCATGACACAAACGTACTTGGAAAAGGAGGTTTTGGCAAAGTCTATAAGGGAACACTAGAAGATGGAAAGGAAGTTGCTGTTAAAAGGCTTAGCAAGGGTTCTGATCAGGGGATAGAGCATTTTAGAAACGAAGTGGTTCTTATTGCCAAACTGCAGCACAAGAATCTAGTTAGACTTCTTGGTTGCTGTATTCATGAGGATGAGAAGTTGCTTATTTATGAATACCTGCCCAACAAAAGCCTGGACCAGTTTCTTTTTGATATTGCAAGGAAGTCTATGCTTGATTGGCCAAAAAGGTTCAACATAATCAAAGGGGTAGCTAGAGGACTTATGTATCTCCACCAAGATTCGAGAACGACTATAATCCATAGAGACCTCAAACCAAGCAACATCCTGCTAGACGTGCAGATGAATCCGAAAATATCAGATTTTGGAATGGCAAGGATCTTTGGAGGCAACGAGCAACAAGAAAGTACCAGACGAGTTGTTGGAACGTACGGGTACATGTCGCCTGAGTATGCGATGGAGGGCATTTTCTCCGTCAAGTCCGACACCTACAGCTTTGGTATTTTGCTACTAGAGATTGTAAGCGGATTAAAGATCAGCTCACCTCATCACCTTGTGATGGACTTTTCAAATCTCATATCATGTGCATGGAACTTGTGGGCAGATGGCAAAGTGAAGGATTTCGTGGACGCAGCCGTAATGGAGAGCTACTCGCTTGATGAAGTGTCCAAGTGCATCCATGTTGGGCTCTTGTGTGTCCAGGACAGCTCCAGTGCTCGGCCTCACATGTCATCCGTTGTGTCTATGCTCGACAGTGAAGCCACGCCTCGTGCAGCTCCCAAGCAACCTACGTATTTCGCGCAAATAAATTACGAAACTAGTGACGCGACAGAAGATTTGGAAAACTCTGCCAATGGTGTGAGCCTTACGGCACTAGAAGGACGATAA
>HvleckRLK22
ATGGTTGCGAGTCGACCTCGGCTCCTCGGTGTGTTTGATGAAGTCAACACATCCAAGTCTTTGAAATGGAGCATTTCTTGGTCCTTTAATTCCCCACATAGGCCAGCAGGCGGCAGCAGTTTCATATCTGCAAGCAAGCAAGCAAATACAGACCATTTCACTCATACCATCTCATTACCTTGCTCTTCACAAGCATATGTGAAAAAAGGCTTGATGGGCATCACTCCGCTCCCCCTTTTCATCCTCCTATTATTGATTTGCTTCTGCAAATCCGATGACCGCCTAACACCCACAAAGCCACTCTTGCCCGGCGACAAGCTCGTCTCCAACAATGGCATCTTTGCTCTTGGTTTCTTCTCCCCAGAAAACTCCGCAAACTCATATGTAGGCATATGGTACCACGGCATCCCGGAGCGGGCATATGTGTGGGTGGCCAACCGCGACAACCCAATCGGCAGCGGTTTGTCCGGGAATTTGGTTCTCACCAACAGCTCTGACCTTGTCTTGTCTGATTCCAAGGGCAGTATCCTTTGGAGGACGACGATCAACGTCACCGCCGGGGGTGATGGGGCTGTGGCGCTTCTGCTTGAGGCGGGGAACTTTGTGGTCCAGTTGCAGAATTTCACGCAGATATGGCAGAGCTATGATCACCCGACTGACACCATACTCCCCGGCTTCAAGTTATGGGCGAACTACAAGACCCATACAGCAGTGCGCATCATTGCTTGGAATGGTTCTCAAGACCCATCCACCGGGAAATTCGTCCTCAGTCGTGACCCCAGCACGGGCCTCCAGATCCTCACCTGGCGCGGGACAAGGAAGTATTGGCGCAGCGGAATGTGGAACGGTGCGGAAGCCTCGGACGAGAACGGATACATGTTGTCCGAGAACGTCGATGATGGAAAAATGATCTACTCGACGTTCAACACTGGCAACAGCTCCTCCCGTAGAACGCACTGGAAGCTGGACTACACGGGCGACTTGCTGCTCAGGACCTGGAGTGGCCAGTCATGGGTGGTTCTGTTCAAGCGCCCAGATGATGGCTGCCGTCACTACGGCTCTTGTGGTCCGTTTGGTTACTGTGACATGCCCACCGGGGAGTGCAGGTGCCTTGATGGGTTTGAGCCTGCGGACAGCTTCAGCGCCAACTTCTCCAGAGGATGCGTGAGAAAGGAGGCGCTGACATGTCGTGACTACCATTTCTTGGCCTTGCCTGGGATGAAGGTGCCTGATGAATTTGTGTATGTGAGGAGCAGAAGCTTCGAGGAGTGCACTGCTGAGTGTGAGCGTAACTGCTCCTGCACCGCGTACGCTTATGCCAACTTGAGCAGTATTGTCGCAACCGGTGGCCCATCAAGATGCTTGGTCTGGACAGGCGAGCTTGTTGACTTAGAGAAGACAGGCGAACTTGGTGGCAATCTGTACCTTCGGCTTGCTGGTTCTCCTGGACACAACGGGAAGGGTGATGTTGGTGTTGTATTAAAGATTGTGCTCCCAGTTATATCATTCCTGCTGATACTCTCGTGCATATATCTTGTCTGCATATGCAAGCGAAGAGGGAAACAAGTAAACAAAGAAAACCTGAAAAGACCGACCCTGGAACACTTGAGCACTTCGCAAGAAGTTTGGGATCAAAATTTGGAATTGCGTTCTATTAGTTTTGAAGAAATTGCTTCTGCAACAAACAGTTTCCATGACATGAACGTACTTGGAAAAGGAGGTTTCGGCAAAGTCTATAAGGGAACATTAGAAGATGGAAAGGAAGTTGCTGTTAAAAGGCTTAGCAAGGGTTCTGAGCAGGGTATAGAGCATTTTATAAATGAAGTGGTTCTTATTGCCAAATTGCAGCACAAGAATCTTGTTAGACTTCTTGGCTGTTGTATTCATGAGGATGAGAAATTGCTTATTTATGAATACTTGCCCAACAAAAGCCTAGACAATTTCCTTTTTGATAACGAAAGGAAATCCATGCTTGACTGGCCAAGACGGTTCAACATAATCAAAGGAGTAGCTAGAGGACTTCTATATCTCCACCAAGATTCGAGGACGACTATAATCCATAGAGACCTCAAACCAAGCAACATTCTCCTAGATATGGAGATGAACCCGAAAATATCAGATTTCGGAATGGCAAGGATCTTTGGAGGCAATGAGCAACAGGAAAGTACCAGACGAGTTGTTGGGACTTACGGCTACATGTCACCTGAGTATGCGATGGAGGGCATTTTTTCCGTCAAGTCTGACACCTACAGCTTTGGTATTTTGCTACTAGAGATTGTAAGTGGATTAAAGATCAGCTCACCTCATGATCTTGTGATGGACTTTTCAAACCTCATATCATGTGCATGGAACTTGTGGGCAGATGGAAGAGTGAGGGATTTCGTGGACGCAGCCGTCACGGAGAGCTATTCGCTCGACGAAGTGTCCAAGTGCATCCATGTTGGGCTCTTGTGTGTCCAGGACAGCTCCAGTGCTAGGCCGCACATGTCATCGGTCGTGTCCATGCTCGACAGTGAAGCCATGCCTCGCACAGCACCAGAGCAACCTGTGTATTTTGCACGGATAAACTACGAAACCAGCGAAGCGATGGAAGACACAGAGAACTCTGCCAATGGTATGAGCATTACGGCGGTAGAAGGACGATGA
>HvleckRLK23
AAGCCACTCTCCCCTGGTGACATGCTCGTCTCCAAGGACGGCATCTTCGCTCTCGGCTTCTTCTCCCCCGCCAACTCCAACAGGAGCTTATATGTTGGAATTTGGTTCTACAACATCCCGGAGAGCAGCCACGCCATCGTATGGGTCGCCAACCGCGACAACCCGGCCACCACCACTTCACCTGCGACACTCGCCATCAGCGTCAAATCCGACCTCGTGTTGTCGGATTCCGAAGGCCATACACTTTGGATGACAAAGAACAACGTCACAGCCGATGAAGACGCGAGAGCCTTTGCGGTGCTGCTCGACACGGGGAACTTGGTTCTCCGGTCCCCGAACGGCACAGTCATGTGGCAGAGCTTCGATCACCCGACGGACACCATCCTTCCCGGCATGAGGTTCCTGCTGAGCTACAAGGGCCATGTGGTGGGGCGCCTTGTCGCTTGGAAGGGCCCGGATGACCCTTCCTTAGGTGATTTTTCGTTCGGTCTTGACCCAGACTTGGACATTCAGATGGTGACTTGGCACGGAGCCAAGCTGTACTGCCGCATCAGCGTGTGGAATGGCGCATCGGTGTCCGGCGGCACATACCCAGGCAGCAACAGCTCCGTCGTGTACCAGACCATCGTCAACTCAGGGGAGAGGTTCTACCTAATGTACTCGGTCTCCGACGACTCACCGTACGCACGCATCATGCTCGACTACACCGGCACCATGAGGCTCCTCACCTGGAACAGCTACTCCTCATCGTGGATAGCCACATCGGAGCGCCCCTCCGGCAGTTATGGCGTCTATGACTCGTGTGGACCGTTTGGCTACTCCGACTTCACGGGTGCTGTTCCAACGTGCCAGTGCTTGGATGGGTTCGAGCCTGACCCAGTGAACTCCTCGAGAGGGTGCCGGAGAGTGGAAGCGCTGAAATGTGGCAGCAAAAACCATTTTCTGGCCTTGTCTGGAATGAAGGTGCCTGACAGGTTCAGGCACATCCGAAACAGAAGCTTTGACCAGTGTGCGGCCGAGTGCAGCCGCAACTGCTCGTGCACAGCCTATGCTTATGCCAACCTGAGAAGTGCTGGGGCTCTAGGGGATCAGACAAGGTGTTTGGTTTGGACAGGGGAGCTTGTCGACACGTGGAAGACCAGCAACTATGGCGAGAACCTGTACATCCGCCTTGGGGACGACTCTCCTGCTGCTGTTCACAAGAATAGCCATTTGGTGAAGATTGTACCGCCGGTTGTAGCATGCCTGCTGCTACTCACGTGCATAGCCATTGTCTGGAAATGTGAGTACAAAATGGTACAGCGAAAGAAGGAAATCAAGAAGAAACTGATGCTACGATACTTGAGTGCTTCTAGTGAGCTTGGAGGCAAAACTTTAGATTTTCCGTTTGTTAGTTTCAAAGATATCGTGGACGCAACGGATAATTTCTCCGACTCCAATATGCTTGGAATGGGAGGTTTCGGCAAAGTTTACAAGGGAATACTGGAAGGTGACAAGCAAGTTGCTATCAAAAGGCTTGGCAGTGGTTCTGGGCAAGGTATAGAAGAATTCAGAAATGAAGCGACTCTAATTGCCAAATTGCAGCACAGAAACCTAGTTAGACTTCTTAGTTGCTGCATTCATGATGATGAGAAGTTATTGATCTATGAATACATGCCTAACAAAAGCTTGGATTCCTTCCTTTTCGATAATACAAGAAAAGATGTCCTTGATTGGCTGACACGGTTCAAAATAATTAAAGGGGTGGCAAGAGGCCTTCTTTATCTCCACCAAGATTCAAGATTAACAGTAATTCATAGAGATCTTAAAGCAAGCAACATTTTGTTGGATAAAGAAATGACTCCTAAAATATCAGACTTTGGTATGGCAAAGATATTTGGTGGAAACCAGCAGCAAGGAAACACTATTAGAGTTGTTGGAACATACGGTTACATGTCCCCGGAATATGTGATGGGTGGTGCCTTTTCTGTTAAGTCAGACATCTACAGCTTCGGTGTTCTTCTCTTGGAGATTGTAAGTGGCTTGAAGATCAGCTCACCTCAGCTCATAATGAACTTTCCAAACCTTACAACTTATGCGTGGAGATTATGGGAAGATGGAAATGCAATGGAACTGGTGGACTCAACAATTGCTGGTAGTTGTCCAATTCATGATGTTGTACGGTGCATTCATGTAGGACTCTTGTGTGTTCAACACCATTCAAATGCTAGGCCAATCATGTCATCAGTTGTGTTTATGTTGGAGAATGAAACCGCTTTGCTTCCAGAGCCTGAGCAACCTGCATATTTTGCAACAAGAAATCAGGAAAATGGACATACCGGCGAAAACATGGATAATTCACCAAATACCATGAGTATCACAACACTAATAGGTCGGTAG
>HvleckRLK24
ATGAGTATGACTTCCCTCCCAGTGTTCCTCCTCCCAATTTTTGTGCTCCTGTCATTGATTTGTCTCTGCAAATCCGATGACCGCCTTTCTCCTGCAAAGCCGCTCTCCGCCGGCGACAAGCTCGTCTCGAGCAACGGTGTCTTCGCTCTTGGTTTCTTCTCCCCCACAAACTCGACTGCAGACTCATACATCGGCATATGGTACAACAACGTCACTAAGCGTACATATGTGTGGGTTGCTAACCGCGACAGCCCGATCACCAGCGGTTCTCCTGGGAAGCTGGTTGTGACCAACAACTCCAACCTCGTCGTGTCTGACTCCCAAGGCCGCACTCGTTGGACAACCATGAACAACTTCACATCCGGAACCACCGGAACTTCTGCTATCCTGCTCAACTCCGGAAACTTTGTCATCCGGTTGCCCAACGGCACGGACATATGGCAGAGCTTCCATCACCCAACCGACACCATCCTCCCCGGCATGCCCTTACCACTGAGCACAAATGACGATCTCTACACCCGCCTTGTTGCTTGGAGGGGCCCTGATGACCCAGCCACCAGCAACTACTCCATGGGCGGTGACTCTAGTTCAGACCTCCAAGTTGTTATCTGGAATGGGACGAGACCATATTGGCGCAGATCTCCGTGGAATGGTGAGTTGGTCACTGCCTCGTATCAAAGCAGCACTGGTTTCATCATGACCCTAAGAATTGTCTACAGAGGGGATGACTTGTACATGACATTCACCGTCTCCGACGACTCGCCAAGCATGCGCATGACGCTGCAGTACACGGGCATGTTTCAGTTTCTGGTGTGGAACAGAGAGTCGTCATCATGGGACGTTTTCACAGAGCAGCCAAGTCCTAGCTGTGACCAATACGCCTATTGCGGACCATTTGGCTACTGTGATGCCACTGAAGCAGTTCCGAAATGCAGCTGCCTCAGTGGGTTTGAACCTGACGGTGTTAACTTCTCCAGAGGGTGCCGGAGAAAGGAGGATCTGAGATGTGGCGGCGGCGATAATTTCCTGACCCTGAGAGGTATGAAGATACCTGATAAGTTCGTCTATGTCAGGAACAGAAGCTTTGACCAATGCAGAGCAGAGTGCAGCCGCAGTTGTGTTTGCACTGCATATGCTTATGCTAACCTGCAAAATGGCAGCACGTCTGATGACCTGTCAAGGTGCTTGATTTGGCTGGGGGAACTTGTCGACGCAGGAAAGTTTCGTGATGGCGAGAACCTGTACCTCCGTTTAGCCAGTTCAACAGTTGCCAAAGAGAGTAATGTCTTGAAGATTGTACTCCCAATAATTGCTGGTATTCTGATACTCACATGCGTCAGCCTTGTGTGGATATGCAAGTCAAGAGGTAAACGACGAATCAAGGAAACTAAGGACACATATACACGACAACCGTCAAAAAATCCCAAATCTAACGAACTTGAGAATGAAACTATAGAACTTCCATATATTTGTTTTGAAGATGTTGTTACTGCAACGGGCAATTTCTCAGACCACAACATGCTCGGGAAAGGTGGCTTTGGAAAAGTTTACAAGGGCTGGTTAGAAGGTGGCAATGAAGTTGCTGTCAAAAGGCTTAGTAAGAATTCTGGGCAAGGAGCCGGTGAGTTCAGAAATGAAGTGGTTCTGATTGCCAAATTGCAGCATAGAAACTTAGTTAGGCTTCTTGGTTACTGCACTCATGAAGATGAGAAGTTGTTGATATATGAATACTTACCTAACAAAAGCTTAGATGCCTTCCTTTTTGGTATGTTCTGCTCTTATGGTCAAGTCTCCCAAAACATTCTTAGAATCACTGAATTTGTGATGGTTGTTAATGCTTTGAATTTTGCACTTCTCTTGCAAGATGCCACAAGAAATTTTGTGCTTGATTGGCAGACCCGGTTTAAGGTAATTAAAGGGATAGCGAGAGGGCTTCTTTATCTCCATCAAGATTCAAGGTTAACAATAATCCATAGGGACCTCAAAGCAAGCAATGTCTTGTTAGATGCGGAAATGAATCCTAAAATATCAGATTTTGGTATGGCAAGGATCTTTGGAGGAAATGAGCAACAAGCGAACACTGTCCGCGTTGTTGGTACATACGGTTACATGTCTCCTGAATATGCAATGGAAGGTTCCTTTTCTGTCAAGTCTGACACATATAGCTTTGGTGTTCTACTGTTGGAGATTGTAAGCGGGATAAAGATCAGTTCATCCCATCTCATAATGGACTTTCCAAGCCTTATAGCTTATGCATGGAGCTTATGGAAAGATGGAAATGCAAGAGAATTGGTGGACTCGTCCATTACGGAGACCTGTCCACTTCATGAAGTTCTGCGGTGTATTCAGTTAGGCCTCTTGTGTGTTCAAGACGATCCAAGTGCTCGTCCACTCATGTCATCCGTCGTGTTCATGTTAGAAAATGAAACAGCCCCGCTTCCTACTCCGAAAGAGCCAGTATATTTTAGGCAACGGAAGTACGAAGTCGAAGACCAAAGGCATGACTATGACCAGGAAATATCTCTGAATGGCATGACTATGACAATGCAAGAGGGGCGTTAA
>HvleckRLK25
ATGTCTCCCCTCCCAGTTTTTGTGCTCCTTTCATTGATTTGTCTCTGCAGATCCGATGATCGCCTGACTCCTGCAAAGCCGCTCTCCGCCGGCGACAAGCTCGTCTCGAGCAACGGTGTCTTTGCCCTTGGCTTCTTCTCCCCCACAAACTCGACTGCGGCCTCATACGTCGGCATATGGTACAACAACATCCCCAAGCGGACGTATGTGTGGATTGCTAACCGCAACAAGCCGATCACCAACGGTTCTCCCGGGAAGCTGGTTGTGACCAATAACTCTGATCTTGTGTTGTCTGACTCCCAAGGCCGCGCTCTTTGGACAACCATGAACAACTTCACAACCGGAGCCACGGGAACTTCTGCTGTACTGCTTGACTCAGGAAACTTTGTCATCCGGTTGCCCAACAGCACGGACATATGGCAAAGCTTCCATTACCCAACCGACACCATCCTCCCTGACATGCAATTACCACTGAGCGCAGATGATGATCTCTACACTCGTCTCGTTGCTTGGAGGGACCCTGATGACCCAGCCACCAGCGACTACTCCATGGGCGGTGACTATAGTTCAGACCTCCAGGTTGTCATCTGGAATGGGACCACACCTTATTGGCGTAGAGCTGCGTGGGATGGCGCGCTGGTCACTGCCCTGTATCAAAGCAGCACTGGCTTCATCATGACCCAAACAACTGTCGACATAGGGGGTAAGTTCTACTTGACATTCACCGTCTCCAACGGCTCGCCAATCACGCGGATGATTCTGCACTACACGGGCATGTTTCAATTTTTGGCATGGAACAGCACCTCATCGTCATGGAAGGCTTTCATAGAGCGGCCTAATCCTATTTGTGACCGCTACGCCTATTGCGGACCATTTGGTTTCTGTGATTTCACTGAAACAGCTCCGAAATGCAACTGTCTCAGTGGGTTTGAGCCTGATGGTGTAAACTTCTCCCGAGGGTGCCGGAGAAAGGAGGAGCTTACATGTGGTGGTGGAGATAGTTTCTCAACCTTGAGTGGCATGAAGACACCCGATAAGTTTGTGTATGTCAGGAACAGAAGCTTTGACCAATGTGAAGCAGAGTGCAGAAACAACTGCTCTTGCACCGCATATGCTTTTTCTAATGTGAAAAATGGCAGCACGTCTAGTGACCAGGCCAGGTGCTTGATTTGGTTGGGGAAGCCTGTCGACACAGGAAAGTTTCGTGATGGTAGTGGCGAGAACCTGTACCTTCGTCTAGCCAGTTCAACAGTTGACAAAGAGAGTAATGTACTGAAGATTGTACTCCCAGTAATTGCTGGTATTCTGATACTCACATGCATCAGCCTTGTGTGGATATGCAAGTCAAGAGGCAAACGACGAATCAAGGAAAATAAGAACAAATATACAGGTCAACTGTCGAAATATTCCAAATCGGACGAACTTGAGAATGAAAGTATAGAACTTCCATATATTTGTTTTGAAGATGTTGTTACTGCAACGGACAATTTCTCAGACTGCAACCTACTCGGGAAAGGTGGCTTTGGAAAAGTTTACAAGGGACGGTTAGAAGGTGGCAATGAAGTTGCTGTCAAAAGGCTTAGTAAGAGTTCTGGGCAAGGGGCTGATGAGTTCAGAAATGAAGTGGTTCTGATTGCCAAATTGCAGCATAGAAACTTAGTTAGGCTTCTTGGTTACTGCACTCATGAAGATGAGAAGTTATTGCTATATGAATACTTACCTAACAAAAGCTTAGATGCCTTCCTTTTTGATACCACACGAAATTTTGTGCTTGATTGGCCAACCCGATTCAAGGTAATTAAAGGGATAGCTAGAGGGCTTCTTTATCTCCACCAAGATTCAAGGTTAAAAATAATCCATAGAGATCTCAAAGCAAGCAATGTCTTGTTAGATGCGGAAATGAACCCTAAAATATCAGATTTTGGTATGGCAAGGATCTTTGGAGGAAATGAACAACAAGCGAACACTATCCGTGTTGTTGGGACATACGGTTACATGTCTCCGGAATATGCAATGGAAGGTTCCTTTTCTGTCAAGTCTGACACATATAGTTTTGGCGTTCTAATGTTGGAGATTGTAAGCGGGTTAAAGATCAGTTCAACCCAACTCATCATGGATTTTCCCAGCCTTATAGCTTATGCATGGAGCTTATGGAAAGATGGAAATGCAAGAGAATTAGTGGACTCGTCCATTGTGGAGAACTGTCCACTTCATGGAGTTCTGCGTTGTGTTCAGTTAGGTCTGTTGTGTGTTCAAGATGATCCAAATGCTCGTCCACTCATGTCATCCACTGTGTTCATGCTAGAAAATGAAACAGCCCCACTTCCTACTCCGGAGGAGCCTGTATATTTTAGGAAACGCAAGTATGTAATTCAAGATCAGAGAGATAACCTGGAAATATCTCTTAATGGCATGACTATGACGATGCAAGAGGGGCGATAA
>HvleckRLK26
ATGAGTATGACTTCCCTCCCAGTGTTCCTCCTCCCAATTTTTGTGCTCCTGTCATTGATTTGTCTCTGCAAATCCGATGACCGCCTTTCTCCTGCAAAGCCGCTCTCCGCCGGCGACAAGCTCGTCTCGAGCAACGGTGTCTTCGCTCTTGGTTTCTTCTCCCCCACAAACTCGACTGCAGACTCATACATCGGCATATGGTACAACAACGTCACTAAGCGTACATATGTGTGGGTTGCTAACCGCGACAGCCCGATCACCAGCGGTTCTCCTGGGAAGCTGGTTGTGACCAACAACTCCAACCTCGTCGTGTCTGACTCCCAAGGCCGCACTCGTTGGACAACCATGAACAACTTCACATCCGGAACCACCGGAACTTCTGCTATCCTGCTCAACTCCGGAAACTTTGTCATCCGGTTGCCCAACGGCACGGACATATGGCAGAGCTTCCATCACCCAACCGACACCATCCTCCCCGGCATGCCCTTACCACTGAGCACAAATGACGATCTCTACACCCGCCTTGTTGCTTGGAGGGGCCCTGATGACCCAGCCACCAGCAACTACTCCATGGGCGGTGACTCTAGTTCAGACCTCCAAGTTGTTATCTGGAATGGGACGAGACCATATTGGCGCAGATCTCCGTGGAATGGTGAGTTGGTCACTGCCTCGTATCAAAGCAGCACTGGTTTCATCATGACCCTAAGAATTGTCTACAGAGGGGATGACTTGTACATGACATTCACCGTCTCCGACGACTCGCCAAGCATGCGCATGACGCTGCAGTACACGGGCATGTTTCAGTTTCTGGTGTGGAACAGAGAGTCGTCATCATGGGACGTTTTCACAGAGCAGCCAAGTCCTAGCTGTGACCAATACGCCTATTGCGGACCATTTGGCTACTGTGATGCCACTGAAGCAGTTCCGAAATGCAGCTGCCTCAGTGGGTTTGAACCTGACGGTGTTAACTTCTCCAGAGGGTGCCGGAGAAAGGAGGATCTGAGATGTGGCGGCGGCGATAATTTCCTGACCCTGAGAGGTATGAAGATACCTGATAAGTTCGTCTATGTCAGGAACAGAAGCTTTGACCAATGCAGAGCAGAGTGCAGCCGCAGTTGTGTTTGCACTGCATATGCTTATGCTAACCTGCAAAATGGCAGCACGTCTGATGACCTGTCAAGGTGCTTGATTTGGCTGGGGGAACTTGTCGACGCAGGAAAGTTTCGTGATGGCGAGAACCTGTACCTCCGTTTAGCCAGTTCAACAGTTGCCAAAGAGAGTAATGTCTTGAAGATTGTACTCCCAATAATTGCTGGTATTCTGATACTCACATGCGTCAGCCTTGTGTGGATATGCAAGTCAAGAGGTAAACGACGAATCAAGGAAACTAAGGACACATATACACGACAACCGTCAAAAAATCCCAAATCTAACGAACTTGAGAATGAAACTATAGAACTTCCATATATTTGTTTTGAAGATGTTGTTACTGCAACGGGCAATTTCTCAGACCACAACATGCTCGGGAAAGGTGGCTTTGGAAAAGTTTACAAGGGCTGGTTAGAAGGTGGCAATGAAGTTGCTGTCAAAAGGCTTAGTAAGAATTCTGGGCAAGGAGCCGGTGAGTTCAGAAATGAAGTGGTTCTGATTGCCAAATTGCAGCATAGAAACTTAGTTAGGCTTCTTGGTTACTGCACTCATGAAGATGAGAAGTTGTTGATATATGAATACTTACCTAACAAAAGCTTAGATGCCTTCCTTTTTGGTATGTTCTGCTCTTATGGTCAAGTCTCCCAAAACATTCTTAGAATCACTGAATTTGTGATGGTTGTTAATGCTTTGAATTTTGCACTTCTCTTGCAAGATGCCACAAGAAATTTTGTGCTTGATTGGCAGACCCGGTTTAAGGTAATTAAAGGGATAGCGAGAGGGCTTCTTTATCTCCATCAAGATTCAAGGTTAACAATAATCCATAGGGACCTCAAAGCAAGCAATGTCTTGTTAGATGCGGAAATGAATCCTAAAATATCAGATTTTGGTATGGCAAGGATCTTTGGAGGAAATGAGCAACAAGCGAACACTGTCCGCGTTGTTGGTACATACGGTTACATGTCTCCTGAATATGCAATGGAAGGTTCCTTTTCTGTCAAGTCTGACACATATAGCTTTGGTGTTCTACTGTTGGAGATTGTAAGCGGGATAAAGATCAGTTCATCCCATCTCATAATGGACTTTCCAAGCCTTATAGCTTATGCATGGAGCTTATGGAAAGATGGAAATGCAAGAGAATTGGTGGACTCGTCCATTACGGAGACCTGTCCACTTCATGAAGTTCTGCGGTGTATTCAGTTAGGCCTCTTGTGTGTTCAAGACGATCCAAGTGCTCGTCCACTCATGTCATCCGTCGTGTTCATGTTAGAAAATGAAACAGCCCCGCTTCCTACTCCGAAAGAGCCAGTATATTTTAGGCAACGGAAGTACGAAGTCGAAGACCAAAGGCATGACTATGACCAGGAAATATCTCTGAATGGCATGACTATGACAATGCAAGAGGGGCGTTAA
>HvleckRLK27
GCCGGGGGAGAGGGGATGAGGGCGCCGCCGCCCTCCCTTCTTCCTCTCCTGGTCGCCGCCGCCTTCCTGTCCCTCTCAATCGCCACAGACAAGATCGACCAGACAGCGTCCATCGCCGGCAACCAGACGCTCGAGTCGGCCGGCGGGGTGTTCAGGCTCGGCTTCTTCGTCCCGCCCGGCAGCTCCGACGGCAGAGCCTACGTCGGCATCTGGTACGCCGCCATCCCGGAGCAGACGGTCGTGTGGGTCGCCAATCGCCGGAACCCGGTCGTGAGACCTCCCGGCGTCCTCAGCCTCTCCGCCGATGGCCGGCTTGTCATCCTCGACGGTCGTAACGCCACCGTGTGGTCCTCCGACGACGCGGCCGGCTCGGGCGGCGTAGCCACCCGCGCCACCGCGCAGCTGCTCGACAACGGCAACCTGGTCGTGAGCCATGGCGGGGAAAGTCAAAGTGGCTCGACGGGTCGGACCGGCTTGGCGTGGGAGAGCTTCGACTACCCGACGGACACGCTGCTCCCCGGCATGAAGCTCGGGGTGGACGGCAGGAGCAGCATCTCCAGGAACATCACGTCGTGGCGCAGCCCGGCCGACCCCTCGCCGGGGGACTACACGTTCAAGCTCGTCAGCGGCGGCCTGCCGGAGTTCTTCCTCTTCCGGAACCTGTCCAAGACGTACGCGAGCGGGCCGTGGAACGGCGCGGCGCTCACCGGCGTGCCCAACCTCAAGTCCAGGGACTTCATATTCACGGTCCTGTCCAACCCCGACGAGACCTACTACACCTACTACGTCAGCGACCCGTCCGTGCTGTCGCGGTTCGTCCTCAACGGCACGACGGGGCAAGTGCAGCGCTTCTCGTGGCACCGTAGCGGCGGCGGCGGCGGCGGGTGGAGCAGCTTCTGGCACTTCCCGCTCGACCCGTGCGACAGCTACGCCAGGTGCGGGGCGTTCGGGTACTGCGACGTCGGCCAGTCCCCGTTGTGCAGCTGCCTGCCGGGGTTCCAGCCGCGGTGGCCGCAACGGTGGAGCCTCGGCGACGGCTCCGGCGGCTGCGTCAGAAGGACCAACCTGAGCTGCGGGGCCGGAGACGGGTTCTGGACAGTGAGCCGGATGAAGCTGCCGGAGGCGACCAGCGCGACGGTGCACGCCGGCATGACCTTGGACCGGTGCAGGCAGCTGTGCCTCGGCAACTGCAGCTGCGGGGCGTACGCCGCGGCGGACGTCAGCGGGGGCATCAACCGCGGGTGCGTCGTCTGGGCCGTGGATCTCATCGACATGCGGCAGTACCCGGAGGTCGTGCAGGATGTGTACATCCGCCTCGCGCAGTCCGAGGTCGATGCCTTGACCGCTGCAGCTTCTTCAGCTAACCGGCGACGAAGCCATGTCGTGCTTGTGATCGCCGTCGTCGCGAGTATCTCCGGCGTGCTTCTTCTTGGAGCCTTTGCCTTTTGCTGTCTCTGTTTCTGGAGAAACAGGGCGGCTGCTGAAACGGCGGCGGCCGGCGGCGCTCGGGACGACGACGTGCTTCGATTACGGGCCAAGAAACACCCACGAGATGATCGGCGGTTCTCCGATGAGAACAAGATGAGCGGCGAGGAAGATGATCTTGACCTCCGGTTGTTCGATCTGGCGGTGATCCTGGCGGCCACGGACAACTTCGCCGCCGACAGTAAGATTGGACAAGGTGGATTTGGCCCTGTCTATCTGGGAAGGCTTGAGAATGGGCAGGAAGTGGCTGTCAAGAGGCTGTCGAGGAAATCAGCACAGGGGGTGGAGGAATTCAAGAACGAGGTGAAGCTCATAGCCAAGCTCCAGCACCGGAATCTCGTGAGGCTGCTCGGCTGCTGCACCGACGGCGACGAGAGGATGCTCGTCTACGAATTCATGCACAACAACAGCCTCGACACCTTCATATTTGATGGAGAAAAACGCAAGTTACTAAGATGGAACACACGCTTCGAGATCATCACAGGAATTGCACGGGGCCTGCTCTACCTCCACGAGGATTCAAGGCTCAGGATCATCCATAGGGATATGAAGGCAAGCAACGTGCTATTGGACAGAAACATGATCCCTAAAATCTCAGACTTCGGCATCGCAAGGATGTTCGGTGGTGATCAGACAACCGCATACACCTTGAAAGTCATCGGGACATACGGCTACATGTCGCCGGAGTATGCCATGGATGGCGTGTTCTCCATGAAATCTGATATCTACAGCTTCGGTGTCATGGTGCTAGAGATCGTCACCGGCAAGAAGAACCGAGGCTTTTATGATGCCGAGCTTGATCTAAACCTCCTCGGTTACGCGTGGACGTTGTGGAAGGAAGGCAGAAGTACTGAACTGCTTGATGAGGCGATGATGGGCAGTAGCTGCGATCACAGCCAGGTGCGGAGATGCATACAAGTTGCTCTCTTGTGTGTTGACATGAATCCTAGGAATAGGCCACTCATGTCTTCAATTGCCATGATGTTGGCCACCGAGAATGCCACGCTGCCAGAGCCAAATGAGCCTGGAGGAAACATCGGAAAGAGCACGTCGGACGGAGAATTATCCCAAACTCAAAGTGAGTTGACCGTAACTGTAACGGATACTCGGTAG
>HvleckRLK28
CTTCTCATGGGAGCACACAAATCTGCATGCACCATCTCTTCTCCAGTTCAGGCCATGGTCGCCCTCTACATATTACTCGGCCTTCTCCTCTCACACGCTCCTCCAAGCTCCTCTGCAACCGACGCTCTCACGGCGGGTCAAGTGCTCATGGTCGGGGATAAGCTCGTCTCAAGCAACGGCAAGTTCGCGTTCGGCTTCTTCCAGTTTCAGCCAGCAGCAAGTACCATCATTAGTAAGTCTACAACCCCCGTATCCAACTGGTACCTCGGCATATGGTTCAACAAGATACCTGTTTTTACTACCGTGTGGGTTGCCAATAGGGAGGACCCAATCCCCAATAATCCCAGCTGGCTCAACCAAACGCACTTCCAAATCTCAAGCGATGGCAATCTTGTCATCATACACCAAGCCGCTGTAATATGGTCCACTCATATTGTAAGCAATAATAGGACACAAAACACTACTACTGGTGTACTCCTGGAGAACACAGGAAATCTAGCCCTCACCTCATCATCTGCCCAAGTGTTGTGGCAGAGCTTCGACTACCCGACAGATGTTTTGCTTCCCACCGGCAAGGTTGGCTGGAACAAAGTCACCGGTTTGAATCGCCGGGGCATCTCAAGGAAGAGCACCGTTGATCCGGGGCTTGGCTCGTATAGCATAGAGCTAGAAACCAATGGCAACGGGATAATCCTCAAGCGCCTACAACCCTCGGTAGTGTATCGGGTTTATGAACCCGAAACATCAACCATACTCAAACTTTTGCCAAGAATCAAGAAGATTCTACAGTTGGATCCACGGACACAAGGTGTGGTTGTCCCAGATTATGTCAATACCCCACAAGAGCAGTACTACACGTACACCTCACCAGATGAATCGTCTTCCTCATTTCTCTCACTAGACATCTCTGGACAGATCAAGCTCAATATTTGGTCACGGGCTAACCAGTCTTGGCAAACAGTACTTGCCGACCCTGTTGATGCCTGCACTCCAGCTGCAACATGTGGTCCTTTCACGGTATGCGACGGCACTACGCAAGCACCATGTGTCTGCATGAAGAACTTCACAAAGAAGTCCCCGCAACATTGGGAGTTTGGTGATCGAACACAAGGGTGCACCAGAAATACACCGCTTTATTGCACTAGTGACAATAAGACGACAAGTTCAACGGACATGTTCCACCCCATTGCTCATGTTACATTGCCCTATCACTCGCAAAGCATAGACCTTGCTACTACTCATAGCAAGTGTGAGGAAGCTTGTCTTAGCTCTTGCTCCTGCACTGCTTATTCCTATGACAATAGAAATTGCTCCGTCTGGCATGGAAAATTGCTTGGTGTCAGTCTTGATGATGGCATTGAAATTCATTCTGAAGATATTCTTTACCTTCGGCTCGCAGCCAAAGATCTGCCAACTTTGCCAAAGGACAAAAGAAAACCAAATGTTGGAGTTATCACTGCTGCAAGCATTAGTAGTTTTGGGTTTCTGATGCTCATGATGTTGCTAGCGATTTGGAGGAAAAAACTTAGGTGGTCTAGTTTGTCAGTATACGACAATCAAGGCCCCAGTGGGATTATCACATTTACATACACTGATTTAGCTCGTGCTACTAAAAACTTCTCTGAAAAGATAGGAACGGGAGGTTTTGGTTCTGTATACAAAGGAGTGTTAAGTGACTCAACTATTATAGCAGTGAAAAGGCTTGATGGTACCCGTCAGGGAGAGAAGCAATTCAGAGCCGAGGTGAGCACAATTGGACTGATCCAACATGTCAACCTAGTGAAATTGATTGGTTTCTGCTGCCAAGGAGATAACAGGTTGCTTGTATATGAACACATGTTAAACGGGTCTCTTGATAGTCATCTATTTCAGAGCGATGGCGTTGTCCTAAATTGGGAAACAAGGTACCAAATAGTCCTAGGAATGGCCAGAGGCTTGTCCTACTTGCATCGGAGTTGTCGCGAGTGCATCATACACTGTGATATTAAGCCAGAAAACATTCTTCTCGATGCATCATTTTTTCCAAAAATTGCAGACTTCGGGATGGCAACGTTTATTGGAAGGAATTTTAGCCGAGTCTTGACCACATTCAGAGGAACAATAGGTTATCTTGCCCCAGAGTGGCTTAGCGGAATTGCTATCACACCAAAAGTTGATGTTTACAGCTTTGGCATGGTACTGTTCGAGATCATATCTGGAAGGAGAAATTCAGCTGAAGAAAATAGCGGCATCAGTGATCTTGTTGAATATTTTCCTATCCAAGTAATCAGGAAGCTTCATGGGGAAGACATGCAAAGTTTGGTGGACCCAAGGTTAGAAGGCATGTTTGATTTGGAAAAGGCTGAAAGGGTATGCAAAGTAGCATTATGGTGCATCCAAGATAATGAGTCTCATCGTCCAACAATGAGTGAAGTGGTTCATGTTCTTGAGGGTCTCAACGAGATTGATCTGCTCCCGATGCCAAGACTACTTGCAGCTATAACTGAACGCCGCAATGGAACTGAAACTTCAGTGTAG
>HvleckRLK29
ATGGACATGGTTCCCCTCCACATATTGATCGGCCTTCTCCTCCTCTTGCACGCCACTACTCCATGCTCCTCGGCAAGTGGCGATACTCTCGCGGCGGGCCAGGTGCTCACCGTCGGGGACAAGCTCGTCTCAGCAAACGGCAGGTTCGCGCTCGGCTTCTTCCAGTTCCGGCCTCCAAGCAACACTACTCTTAGTGAGTCCATAGACACCACCTCCTCAAACCCCGACTGGTACCTCGGCATATGGTTCGACAAGATACCGGTTTTCACAACCGTGTGGGTCGCCAATAGGGAAGACCCAATCACCGACCCCAAGCCCAGCGTCACACAACTCAAAATCTCAACCGATGGCAACCTTGTCATCATACACCATACCGTTGCAATCTGGTCCACTCGTGTTGTAAACAAGAATAGGACACAAACCAACACCATAAACACCACGACTGCGGTCCTCATGGACAGTGGAAACCTAGCCCTTCAATCATCATCTGGCCAACCGTTGTGGGAAAGCTTCGATTACCCAACTGATGTTGTGCTCCCCGGCGCCAAATTTGGTTGGAACAAGGTCACCGGCTTGAACCGTCGGGCAATCTCGAGAAAGAGCATCCTTGATCCGGGGCTTGGCTCATATATCGTCGAGCTGGATACCAGTGGCAAGGGGATTGTCCTCCAGCGCCGCAATCCCTCTGTAGTGTATCGGGTTTATGCGCCTGAATCATCAGAGATACTGAAACTTTTGCCCAGAATCCAGAAGATTCTAGAACTGGATCCACGCACAAAAGGTTTGATTGTCCCAAATTATACCAATAACGAAGAAGAGGAGTACTATATTTACATCTCACCAGATAAATCAGCTTCTTCATTTCTCTCGCTAGACGTCTCTGGTCAGATCAAGCTGAATATCTGGTCCGAAGCCAGCAAAAGTTGGCAACCCGTATTTGCCGACCCTGTTGATGTCTGCACTCCACCTGTAACCTGCGGACCTTTCACGGTATGTGCCGGCAATGCGGAACCACCATGTGATTGCATGGAGAACTTCTCTAAGAAGTCACCGCAGCATTGGGCATTGGGTGATCGAACACAAGGGTGCATTAGAAATACACAGCTATATTGCACCAATGACAAGAACACGACAAGCTCAACAGACATGTTTCACCCCATTGCCCGAGTAACATTGCCCTACAACTCGCAAAGCTTAAACCTTGCCACCACTCGTAGTAAGTGTGAGGAAGCTTGTCTCGGCTCGTGCTCCTGCATGGCTTATTCCTATAGCAATAGCAATTGCTCTGTCTGGCATGGGGAACTGCTTGCTGTAAATCTCGATGATGGCATTGAAATTAGTTCTGAAGATACTCTTTACCTCCGCCTTGCCGCCAAAGATCTGCCAAGTTTGCCAAAAGACAAAAGAAAACCAAATGTTGGAGTTGTTACTGCTGCAAGCATTGGTAGTTTTGGGTTACTAATGCTTATATTGTTAGTGATTTGGAGGAAACAAATTGGTTGGTGTGGTGCCCCATTATACGGCAATCAAGGACCCAGTGGGATTATCGCATTTAGATACACTGATTTAGCTCATGCTACTAAAAATTTCTCTGAAAAACTGGGAACAGGTGGTTTTGGTTCTGTATATAAGGGAGCACTAAGTGACTCGACTGCTATAGCGGTAAAAAGGCTTGATGGTGCCCTTCAGGGTGAGAAGCAATTCAGAGCTGAGGTGAGCTCAATTGGATTGATTCAACATGTCAACCTAGTCAAATTGATCGGCTTCTGTTGCCAAGGTGATAACAGATTACTTGTGTATGAGCATATGTTAAATGGATCTCTTGACGGTCATCTATTTAAGAGCAATGCCTTTGTCCTGAGTTGGGACATTAGGTATCAGATAGTCCTAGGAATCGCTAGAGGACTATCCTACATGCATCAGAGTTGTCGGGAGTGCATCATACACTGCGATATTAAGCCAGAGAACATTCTTCTCGATGCATCATTTTTCCCTAAAATTGCAGACTTTGGGATGGCAGCTTTTGTGGGCAGAAATTTTAGCCGAGTCTTGACTACATTCAGAGGAACCGTAGGTTATCTTGCGCCAGAGTGGCTTAGTGGAGTTGCTATCACACCCAAAGTTGATGTTTACAGCTTTGGCATGGTACTGTTTGAGATCATATCAGGAAGGAGAAATTTACCTGAAGCTTGTACTGGCAGCGGTGCCGGTGATCGTGTTGAATATTTCCCTGTGCAAGTCATCAGCAAGCTTTGTGGGGGAGATATGCACAGTTTGGTTGATCCACAGCTACATGTTGACTTTGATTTGAAACAGGCTGAGAGGGTTTGCAAAGTGGCATTATGGTGCATCCAAGATGACGAGTCCGATCGGCCGACAATGGGTGAGGTGGTTCGGGTTCTTGAAGGTCTTCAGGAGATTGACATGTTTCCGATGCCAAAACTACTTGCAGCTATAACTGGACGCCCTAATGTAACTTCAGTGTAA
>HvleckRLK30
TCCGCCATGGCAGCGGCTCTTCTCCTCGTGCTCGTGTTCGCGGCCCTCTGTCTCTGTGTCGGCGGCGCCGGTTCCACGGACACCGTCTCGGCTGGCCGACCGCTCGCTGGCGGTGACGCCAGGCTCGTCTCCAACAACCGCAAGTTTGCGCTCGGCTTCTTCCAATCCCAGCAGGCCAGCGAGGAGTTCGGCGGCTCCAAGTGGTACCTCGGGATATGGTTCAGCGCTGTCCCCGACCTGACAACCGTATGGGTAGCCAACGGCGCCAACCCGATCTTGGACGGCGCCTCGCCGGAGCTCGCCATCTCCGCTGACGGCGACCTCGCCGTCTTCAACCGCGCCAACGCAACCATCACCTGGTCTACCAAATCAGCCAATGGAAGTGGAAGTACGGCCAACGACACGTCGGCCGTGCTGCTGAACAGCGGCAACCTCGTCCTGCTCGACGCCTCGAACCACTCCGGTCAACCCCGTATACTGTGGCAGAGCTTCGACCACCCCACCGACACTCTGCTCCCCAGCGCGAAGCTCGGCCGCGACAAGCTCACCGGCCTGAACCGCCGCCTCGTCTCAAACAAGACCCCGGCCGGCCCGCCGTCACCCGGAGCCTACTGCTACGAGGTGGACTCGGCCACTCCCCAGCTCGTCCTCAAGCTCTGCGACTCCTCCGCCACCTACTGGGCCACCGGCTCATGGAACGGCAAGTACTTCGCCGCCATCCCGGAGCTGTCGGGCAACGTCCCGACGTTTCAGCTCGCCTTCGTGGACAACGGCCGGGAGGAGTACCTCCAGTACAACGTGACGGATGAGGCCGTCGTGACGCGCAACATCATCGACGCAGCCGGCCAGAACAAGCACCAGGTCTGGCTCGACGCCTCGCGGGGCTGGCTCACGCTCTACGCCACGCCCAAGGGGCAGTGCGACGTGTACGGGGTCTGCGGGCCGAACACGGTCTGCGCCTACAGCCTGCGTCCGCTGTGCAGCTGCATGAAGGGCTTCTCCGTGTGGTCGCCGGAGGACTGGGCGCAAGGTGACCGGTCAGGCGGATGTGTCAGGACTTGGCAACAAGGAGAATCATTCTTAGAGGACGCGTCAGGATCCGGTGACAAGTTTTTCTCCATGACTGATGTTAGCTTGCCTGACAAAGCTCAGAGGATCCAAGCTGCTGAAAGCATGGCGGAATGCTCGGAGGCTTGTCTGTCCAACTGCTCTTGCTTTGCTTACGCATATGCCGGGCAGGGATGCCTTGTCTGGACAGACAGATTGCTCAACGCGAAATTGGGGCAGAGCAATGGTGGAACTACTGCTGCCTCTGATGGAGAAACTCTGTATCTTCGTCTTGCTGCCAGTGAGATGACGAGAAGTGCAAGAAGCAACCGAAGAAGAAGAGCGATCATTGGGGTCGCCATTGCTGCAGGCACTGCTGCTGCTGCAGCTGTGCTCGTCATGGTAGCACTGATGATGCGGAGGAGCAGAACCAACAACGTCGTTCAGGATGGTGGGCTTGTGGCGTTCAGATACAGAGATTTGCGCTCGGCGACCAAGAATTTCTCGGAAAAAATAGGCGAAGGCGGCTTCGGCTCCGTCTTCAAGGGACAACTGCGCGACACTGACATCGCCGTGAAGAGGCTCGACGGCAGCTTCCAAGGCGAGAAGCAGTTCAGGGCGGGGGTGAGCTCGATCGGGGTCGTCCGGCACGTCAACCTGGTGAAGCTGATCGGCTTCTGCTGCGACGGCGACGGCAGGTTCCTCGTCTACGAGCACATGCCGAACCGCTCCCTCAACATCCACCTGTTCGGCCAGAGCGACGGCGGCGGCGGCGTGTTCTTGGACTGGAGCACCCGGTACCAGATCGCCGTGGGAGTCGCCAGAGGCCTGGCGTATCTGCACGAGGGCTGCCGGGACCGCATCATCCACTGCGATGTGAAGCCGCAGAACATCCTCCTGGACGTGTCGCTCCGCCCCAAGATCGCCGACTTCGGCATGGCCAAGTTCGTCGGGAGGGACTTCAGCCGCGCCCTGACCACGATGAGGGGAACCATGGGGTACCTCGAGCCGGAGTGGATCAGCGGGACGCCCATCACGCCGAAGGTGGACGTGTACAGCTACGGCATGGTGCTGCTGGAGCTGGTCTCCGGGAGGAGGAACTCGAGCGGAGGGTCGTGGACGTGGACGACGCACGCCGACGACGACCAGGTGGTGGACTACTTCCCCGTGCGGGCGTCGAGGAAGCTCGCGGCGGGCGAAGTGAGGAGCTTGCTGGACGAGAGTCTGTGCGGCGAGGCGGAGCTGAAGGAGGTGGAGAGAGCCTGCAAGGTCGCTTGCTGGTGCATCCAGGAAGACGAGGCGGTCCGGCCGGCGATGGGGCAGGTGGTGCAGATCCTTGAGGGCGTGCTCGACCGCGAAATGCCCCCGTTGCCAAGGTTGCTCGAGGCCATCTTCGCCGGGAGGCCGCGCTCCGTCGACACGTCCATTTTCTGA
>HvleckRLK31
CTTTTCTACTCGCAGTCCAGATTGTCCAAAGTGTGGCCGCCACTGATTGTGGGACAAGGTGCTGCGCTCGCTCCTCTGGAAGTTATGCCCACCCATGGCGGCGGTGCAGCGCGTTCGCTCGGCCCTGGCAACTCCCCACCCATACCGGCGGCGCTGTTATTCCTGCTCCTCCACGGTTCCCTGTTGGCCGCGTCCGCCACCACGGACACCATCCGGGGCGGCAAGGGCATCTCCGGGAACGAGACCCTGGTCTCCAAGAGCGGCGGCTTCGAGCTGGGCTTCTTTCCGCCGGGCCCCGGCATCCACTACTTCCTGGGTGTCCGGTTCAGGAACATGGCGGGGAACAGTCCCGCCTTCTGGCTCGGGGACAGGGTCGTCATCACCGACCTGCCCGGCGCATCGCTGGAGATCTTCGGCGACAGCCTCTACATCAACGAGAATGGGGCCAGCCTCTGGTGGTCGCCGTCGCCCGGCGGCAATGTGTCGTCCGCCGCCGTGGCGGTCCTTCTCGACAACGGAAACCTGGTCGTGAGGGACCAGGGGAACTCCTCTCTGGTCCTGTGGCAGAGCTTCGACTACCCCGGCGACGCGATGCTCCCCGGCGCGAGGCTCGGGCTCGACAAGGACACCGGGAAGAACGTCTCCCTGACGTTCAAGAGCTTCTCGCACAATGGCAGCCTCGGCCTCGACGCAACCCGGACGAACGGGTTCGTGCTCACCACCGACGGGCACGCCAACCGCGGTACCTTCCCGGAGTGGATGGTGTCCTCCGAAGACAACGGCAGCTCGCTGCTGCTGAATCGCCCGGAAACCGCGAATGGTACCGAGTTCTTGCAGTTCAATCTGGGGCAAATCAGCCTGATGAGGTGGTCGGAGCCGGATCCCGCCGCAAACAGCACCGGTGGCTGGGTCGCTCGCTGGTCCTTCCCTTCCGATTGCAAATCCGGCGGGTTCTTCTGCGGTGACTTCGGCGCCTGCACGGACAGCGGGAAGTGCAGCTGCGTGGACGGGTTCACGCCGTCGTACCCGATTGAGTGGGGGCTTGGGTACTTCGTCACCGGCTGCTCGAGGTCTCTCCCGCTGAGTTGCGGTTCCGGCGGCCTGACGGAGCACGAAGACTCGTTCGCCCCGTTGGACAAGCTGCAAGGGCTTCCTTACAACGGCCAGGACGAGGTGGCCGGAACCGACGAAGACTGCAGAGCGGCTTGCCGGAGCAAATGCTACTGCGTCGCCTACTCGTATGGCCATGGATGCAAGCTCTGGTACCACAACCTGTACAATCTGAGCTCGGCTGCTAGGCCTCCCTACACCAAGATCTACCTACGTATGGGCTCCAAGCTCAGGAACAAGAAAGGTTTGCAAACAAGAGGAATAGTGTTGTTGGTAACTGGATTCATAGGCATTGTTTCTTTGGTACTGATATCGGTACTGCTATGGAGATTCAGGAGGAATTCATTTGGTGCCGGGAAGTTTGAAGTAGAAGGCCCTCTTGCGGTCTACTCTTATGCACAGATCAAGAAAGCCACGATGAATTTCTCTGATAAAATAGGCGAGGGAGGATTCGGAAGTGTTTTCAGGGGAACAATGCCAGGATCAACTGCCATCGCTGTGAAGAATCTCAAAGTCCTCGGGCAGGCAGAGAAGCAATTCAGGACAGAAGTTCAGACACTTGGGATGATCCAGCACAGCAATCTTGTTCATCTCTTGGGATTTTGCGTCAAAGGGAAAAGAAGGTTGCTGGTGTATGAGTGCATGCCAAATGGCTCTTTGGATGCTCATCTCTTTGCAGAGAAGTCTGGTCCGTTGAGTTGGGATGTTCGGTACCAAATTGCACTAGGCATCGCCAAGGGTCTCGCCTATCTACATGAAGAATGCGAGGACTGCATCATACACTGCGACATCAAACCTGAGAACATATTGCTTGATGCGGAATTCTGGCCCAAGATTGCTGATTTCGGCATGGCGAAGCTGCTTGGACGAGAATTCAACTCCGCGCTGACCACTGTGCGAGGAACAATGGGATATCTCGCCCCAGAGTGGATATCCGGGCTGCCGATCACTAAGAAGGCAGATGTGTACAGTTTCGGCATTGTGCTATTCGAGATTATCTCGGGAAGAAGGAGCACTGAGGTGGTGAGATTTGGGAACCATCGATATTTTCCGGTCTATGCCGCTACTCATGTGAGTGAAGGGGAGGTTTTGTGCCTGCTGGATGCTAGGCTGGAAGGAGATGCCAATGTTAAGGAGCTGGATGTCACCTGTAGGGTCGCCTGCTGGTGCATTCAGGACGAGGAGAATGACAGGCCGTCAATGGGACAAGTTGTTCGCATGTTGGAAGGTGTCCTATACACTGAGATGCCCCCTATTCCAGCTTCGTTTCAGAACCTTATGGAGGGTGATAACAGTGTTATATACTCTGATTTCTGA
>HvleckRLK32
ATGTTGGTCGAAATAAGCTACTTGAAGAAGTGCACAGTTGTTCTGCTGATTCCATCTGTGTTAGCAATAAGATGTTTCGCAGCTACCACGACAAGAGATAGCATCGCGCTCAATGAATCCATTTCTGATGGGCAGAGCCTTATTTCTAGTAACAGTAAATTTGTGCTTGAATTCTTTAGCCCTGGAGCTTCAAGCCACCGATATATTGGTATATGGTATTACAGTGTTCCAAGAGGAACGGCTGTATGGATAGCTAACAGGAATAACCCAGTACAGGATAAGTCGGGCGTACTTAAGTTTGATGATGTCGGTAATCTGATAGTCCAGAATGGCACAGGCAGCTCGTTTGTAGTTGCTTCTGGTTCTGGGGTGGGATTGAGGGACAGGGAGGCTGCAATACTGGATACTGGCAACTTTGTGCTAAGGAGCATGGCCAACCATTCAAATACCATATGGGAGAGCTTTGACTACCCTACTGATACATGGCTCCCTGGAATGAATATTACACTTGGAAATTTGCTGAAATCATGGAAGACCTATGATGATCCAGCAACGGGAGATTACACTTTTGGTTTTGGACCGAGCATAGTTAATGATTCAGCATCACAATTCGTTATTAACTGGAATCGGAATTCATTTTGGACAAGTGCACCCTGGAATGGTGACACGAATTCTCTCATTCCAGAACTGAAATCTATTGGTATCATCCCTGTTTCATTTCAGTGTGACAACCTTACATGCATGTACACTCCCAACCCTGCTGGCATAATGTCTAAGATTGTTTTGGGTCAAAGTGGTTCACTGAACATAACACAGTTCGATTTGGAAGGCAAATTGTGGACATTGTTATGGAGACAGCCGCCCAGTTGTGACGTGTCTAATTTATGTGGAGTTTATGGTGTATGCAACAACAGTGCGTTATCAGCACCTGTATCAGCACAAGTATCCCTTTGTCAGTGTCCAGAAGGATTTGCACAACAAGACCCATCAAATTCCAGGAAAGGGTGCACCAGACAAACCCCACTGCAGTGTAATGGTGATAGGTTTATTGATATGCTTAATATGACGCTTCCTGACTACAGACAGAAGCTGTCTGTTGTGGAAAAAAGTGAATGTGAATTTGCCTGTATGAAAGATTGCTCTTGTACGGCGTATGCTCATTCGCTACCCGATGGTTGCAGCTTATGGCATGGCAATCTAACAAACTTGCAGGATGGAGTTGAAATTCTTCATCTTCGCATAGCTGCATCAGAATTACATGGTCACAAAATGCTTTGGCTAGCGTATGTACTTCCATCAGTTGCATTCCTTGTCTTTTGTCTCATCTCTTATATTTGGATTAGGAGATGGAAAAATAAAGGGAAAGGAAAACAGTATGATCACCCCCTGGTCATGGCTTCAGATGTAATAAAACTTTGGGAGAGTGAAGACACAGGCTCTCACTTCATGATGCTTTCCTTTTCACAGATAGAAAATGCCACAGACAACTTCTCAACTGAAAACAAGCTTGGAGAAGGAGGGTTTGGACCTGTGTACAAGGGCAACTTACCAAATGGACAAGATGTTGCTGTTAAGAGGCTTGCAGCGAATTCAGGGCAAGGACTACCAGAGTTTAAGAATGAAATCTTATTAATAGCCAAGCTGCAACACAGCAATTTAGTTGGACTCTTAGGTTGCTGCATTGACGGGGAAGAAATGTTACTAATCTATGAGTATATGCCAAACAAAAGCTTGGATTTCTTCCTATTTGAACAATCGAGAAGGGTTTTTTTAGTCTGGGCAATGCGCCTTAACATAATTGAAGGGATTGCACAAGGTCTTATTTATCTCCACAAGCATTCTCGGCTGAGAATTATTCATAGGGACCTGAAGCCAAGCAACATTCTGCTGGATACTGATATGAACCCTAAGATTTCAGATTTTGGAATGGCAAGAATATTTGATCCTAAAGGAGGACTAGCTAACACGAAAAGAGTCGTCGGAACATATGGCTACATGGCTCCTGAGTATGCTATGGCAGGCATTTTCTCTGTGAAATCTGATGTATATAGCTACGGGGTATTGCTTCTGGAGATCATCAGTGGACTAAGAAATGCCGCAGCTCGTGGACATGGCAACTCCCTAAACCTCCTTGGTCATGCATGGGAGCTGTGGAAAGAAGGCAGATGGCGCGAGCTCATTGATAAATCGTTGCACGGTGCATGTCCTGAGAATATGGTGCTAAGATGCATTCACGTCGGCCTGTTGTGTGTTCAGGAGAATGCTGCTGATCGTCCCTCCATGGCCGAAGTCATTTCCATGATTACCAACGAAAACGCCACCTTACCGGCCCCAAAACAACCTGGCTTCCTCTCCATGTTGCTTCCGACTGAAGCTGATGTCCCTGAAGGAAGTTTCTCTCTGAATGATTTGTCAATTACTGCCCTGGATGGTAGGTAG
>HvleckRLK33
ATGTTGGTCGAAATTAGCTACTTGAAGAAGTGCACAGCTGTTGTTCTGCTGATTCCATCTTTATTAGCAATAAGATGTTTCTCAGCTACCACGACAAGAGATAGCATCGCGCTGAATGAATCCATATCTGATGGGCAAAACCTTGTTTCTAGTAAGAAGAAATTTGTGCTTGGATTCTTTAGCCCTGGAGCTTCAAGCCACCGATATATTGGTATATGGTATAACAATATTCCAAATGGAACGGCTGTATGGGTTGCTAATAGGAATGATCCAGTACATGATAAGTCCGGTGTGCTTAAGTTTGATGATGTCGGTAATCTGATACTACAAAATGGCACAGGCAGCTCGTTTATAGTTGCTTCTGGGGTGGGAGTGAGGGACAGGGAGGCAGCAATACTGGATACTGGTAACTTCGTGCTAAGGAGCATGACTGGCCGTCCAAATATCATATGGGAGAGCTTTGCCTCTCCTACTGATACATGGCTCCCTACAATGAATATTACAGTTAGAAATTCGCTGACGTCATGGAAGAGCTATGATGACCCAGCAATGGGAGATTACACTTTTGGTTTTGGACGGGGCATAGCTAACACATCGCAATTCATTATTAACTGGAATGGGCATTCATTTTGGACAAGTGCATCCTGGACTGGTGACATGAATTCTCTCATTCCAGATCTGACATCTATGAGTACCATCCCTGTTTCATTTCAGTGTGACAACTCCACATGCATATACAGGCCCAACCCTAATGAACAAATGACTAAGATTGTTTTGGATCAAAGTGGTTCATTGAACATAACACAGTTTGATTCAGATGCCAAATTATGGACATTGCGATGGAGACAGCCAGTCAGTTGTGATGTGTCCAACTTATGTGGGTTTTATGGTGTATGCAATAGCACGTTATCAGTATCCGTAAAAGCATCAGCATCAGCATCAGCATCAGAACCAGTATCTCTTTGTCAGTGTCCAAAAGGATTTGCACCACAAGAAAAATCAAATCCCTGGAAAGGGTGCACCAGACAAACCCCACTGCAATGTACTGGTGATAGGTTTATTGATATGCTTAACACGACACTTCCTCACGACAGATGGAAGCAGTCTTTTATGGAAGAAGATCAATGTGAAGTTGCCTGCATTGAAGATTGTTCTTGTACGGCATATGCTCATTCTATATCCGATGGCTGCAGTTTATGGCATGGCAATCTAACAAACTTGCAGTGGTACGGCAATCTAAAAAACTTGCAGGATGGAGTTGAAAGTCTTCATCTTCGTGTAGCTGCATCAGAACTGGAATCTAGCCATAGCTCAGGTCACAAAATGCTTTGGATAGCGTATGTACTTCCTTCAGTTGCATTTCTTGTTTTTTGTCTCGTCTCTTTTATTTGGTTTCGGAGATGGAAAAATAAAGGGAAAGGAAAACAGCATGACCACCCCCTTGTCATGGCTTCAGATGTAATGAAGCTTTGGGAGAGTGAAGACACGGGCTCTCACTTTATGACACTTTCCTTCTCACAAATAGAAAATGCCACAGACAACTTCTCAGCTGAAAACAAGCTTGGAGAAGGGGGCTTTGGCCCTGTGTACAAGGGCAACTTACAAAATGGACAAGATGTTGCTATTAAGAGACTAGCAGCGAATTCAGGGCAAGGTCTACCTGAGTTTAAGAATGAAATCTTATTAATAGCCAAGCTTCAACATACAAATCTAGTTGGACTCTTAGGTTGCTGCATTGATGGGGAAGAAATGTTACTAATCTACGAGTATATGTCAAACAAAAGCTTGGATTTCTTCCTATTTGAACAATCGAGAAGGACTATTTTAGTCTGGGAAATGCGTCTTAACATAATTGAAGGGATTGCACAAGGTCTTATCTATCTCCACAAGCATTCTCGGCTGAGAGTTATTCACAGGGACCTGAAGCCAAGCAACATTTTGTTAGACAATGATATGAACCCTAAGATCTCAGACTTTGGAATGGCAAGAATATTTGATCCTAAAGGAGGACTAGCTAACACGAAAAGAGTCGTTGGAACATATGGCTACATGGCTCCTGAGTATGCTATGGCAGGCATTTTCTCTGTGAAATCCGATGTATATAGCTACGGGGTATTACTTCTGGAGATCATCAGTGGACTAAGAAATGCCGCAGCTCGTGGACATGGCAACTCCCTAAACCTCCTTGGTCACGCATGGGAGCTGTGGAAAGAAGGCAAATGGCGCGAGCTCATTGATAAATATTTGCACGGTGCATGTCCTGAGAATATGGTGCTAAGATGCATTCACGTCGGCCTGTTGTGCGTTCAGGAGAATGCTGCTGATCGGCCCTCCATGGCCGAAGTCATTTCCATGATTACCAACGAAAACGCCACCTTACCGGCCCCAAAACAGCCTGGCTTCCTCTCCATGTTGCTTCCGTCTGAAGCTGATGTCCCTGAAGGAAGTTTCTCTCTGAATGATTTGTCAATTACTGCCCTGGATGGTAGGTAG
>HvleckRLK34
TGTCACGCTGATTTGAAGTTTATGGGTTGCCACTCACGCATCCATTCTCTCGCACGACACCCACCGCGCGCTCATGCAGAGTCTCAGGCCGTCCTCGAGTCACAAACTACGCTCGTAATCGGGCGCCCGATTCTAATGAGGGCGCGAGGAGAGAGGATGAGGGCGCGAGGAGAGAGGATGAGGGCGCCTGCGCGCGCTCTCCTCATCGTCTTCGCCGGCACCTTCCTCTCCATCTCCATCTCCATCGCCACCGACACCATCGGCCATGGCGCGTCCATCACCGGCAACCAGACGCTCGTCTCAGCCGGTGGGACCTTCAAGCTCGGCTTCTACAACCCGCCGGGAAGCTCCGATGCCAGAGCCTACCTCGGCATTTGGTACGCGGGCATCCCGGAACAGACCGTCGTGTGGGTCGCCAACCGCCAGAACCCGGTCGCCAGCTCCCCCGGCGTCCTCACGCTCTCCCCTGACGGCCGCCTCTTCATCGTCGACGGCCGGAACACCACCCTCTGGTCCTCCGCGGCGCCTGCCAGTGCCAGAGACATAACCACCAAGGCCACCGCCCAGCTTCTCGACAACGGCAACTTTGTGGTAAGGGGCTATGATGGCAGTGGGTCGAGTCAGAGCGTGGCGTGGCAGAGCTTCGACTACCCGACGGACACGCTGCTCCCCGGCATGAAGCTAGGGGTGGACCTCAAGAGCGGCATCGCCAGAAACATCACGTCGTGTACAAGCCCGACTGACCCCTCGCCGGGAGCCTACACGTTCAAGCTGGTCATGGGCGGGCTGCCAGAGTTCTTCCTTTTCCGTGGCCCGGAGAGGATCTACGCGAGCGGGCCGTGGAACGGCGTGGTGCTCACCGGCGTGCAAAACCTCCATACCGAGGGCTACACATTCACGGTGGTGTCCAACGCCGAGGAGACATACTACGCCTACTACGTCAGCGACCCGTCGGCCCTGTCGCGGCTGATCCTGGACGGCGCGACGGGGCAGCTGCAGAGCTACGTGTGGGGCAATGGCGCGTGGAGCAGCTACTGGTACCACCCAAACGACCCTTGCGACAGCTACTACAAGTGCGGTGCTTTCGGTTTTGGGGTATGCGAGGTTGGCCAGCCCCCCAAGTGTAGCTGCCTGCCGGGGTTCAAGCCGCGGTCACCGGAGCAATCGGACCACAGGAACGGGAAAGGGGGATGTGTAAGGGTAACCGACCTGAGCTGCGGCGCCGGAGACGGGTTCTGGCCGGTGAACCGGATGAAGCTGCCGGAGGCGACCAACGCGACGGTGTATGCCGACATGACGCTGGACCGGTGCAGGCATGTGTGCCTGGCTAACTGCAGCTGCAGAGCCTACTCCGCCGCGAACGTCAGCGGCGGGATCAACCGCGGGTGCGTCATTTGGGGCGTCGATCTGCTTGACATGAGGCAGTACCCGGTGGTCGTGCAGGATGTGTATATCCGGCTCGCGCGTTCAGAGATCGACGCCTTGAACACCGAAGCTAACCGTCGGCGTCCAAACAGGAGCGTGGTGATCCCTGTCGTCACAACTATTTTTGGCGTGCTTCTTGTGGTGGCAGTTGCCTGCTGCTATTACTTGAGAAACAATGCGAGCACAAAGCGTCGGACCGAAATGCCACCAAGTAGAAGGGGCGACGTGTTTCCCCTAGGGATCAGGAAACGTTCAGCCCTGAGGACGAAACAGGATCAACAACTCAATGGGAGCAGGATGAGCAGCGAAAAAGATCTTGAACTTCCATTCTTTGATTTAGAAGTGATTCTAGCTGCAACAGACAACTTCTCTGCTGATAGTAAGATAGGACAAGGTGGATTTGGCCCCGTTTATATGGCAAAACTTGAAGATGGACAAGAAGTAGCTGTAAAAAGGTTATCCAAGAAATCAGTACAGGGAGTTGTGGAATTCAAGAACGAGGTAAAACTGATAGCAAAGCTTCAGCACAGGAATCTCGTGAGGTTGCTGGGCTGCTGCATCGATGACCAAGAGAGAATGCTAGTGTACGAGTTCATGCACAACAACAGCCTAGACACATTCATATTTGATGAAGGAAAGCGCAAGTTACTAGGATGGAAGAACCGATTTGAGATCGTTCTGGGGATTGCACGGGGTTTGCTATATCTCCATGAGGATTCAAGGGTCAGGATCATCCATAGGGATCTAAAGGCAAGCAATGTGTTACTAGACAAAAATATGATTCCCAAAATCTCAGATTTTGGTATCGCAAGAATGTTTGGAGGTGATCAGACAACTGCATATACCACAAAGGTCATCGGTACATATGGCTATATGTCTCCAGAATATGCAATGGATGGCGTGTTCTCTATGAAATCTGATATCTATAGCTTCGGTGTACTGGTGCTAGAGATCATCACTGGCAAGAAGAATCGAGGCTTTTACGACGATGAGCTTGATCTGAGCCTCCTTGGTTATTCATGGAAGTTGTGGAAAGAAGGCCGGAGTGCGGATTTACTGGATGAAGCAATGGGTGGCTCCATTGACTACAGTGTGGTGCTCAGATGCATACAGGTTGCTCTGCTATGTGTTGAAGTGCATCCTAAGAACAGGCCACTGATGTCTTCAGTTGTCATGATGCTGAGCAGTGAGAATGCAACATTGCCAGATCCAAACGAACCTGGGGTAAATATTGGGAAGAGCACGGACACGGATTATTCTCAAACCCACACTGGGACCAGTTTTACAGGGGATGCAATGAATGGTAGGTAG
>HvleckRLK35
ATGGCGTCGTTTGCTCGTTACCTCCTCCTCATCCCCCTCGTCCTCGCGTCCACGGCATGCCATGCCAGGGACGCCGTCACGCCGGGCCGCCCGCTCTCCGCGAACCAGACGCTGCTCTCGGTCCCCGGCGGCAAATTCGTGCTCGGCTTCTTCACCCCGCCGGGCGCCAACAACACCTACGTCGGCGTCTGGTACGGCAAGGTCTCCGTCCGCACCGTGGTCTGGGTCGCCAACCGCGAGCACCCGATCCCCGGCGACGTTGCGAGCAACCACGGCGCCACGCTCTCCGTGTCCGCCACCGGCACGCTCGCCATTGCCACCGGCAACTCGACCGTCGTGTGGTCGGTGAAGCCGGCGTCAGCGCTGGCCAGCCCCGCGGCGCGGATCCTGGACAGCGGCAATCTGGTGCTGGCGGATGCAGGCGGCGGCGTGGCGTGGCAGGGGTTCGACTACCCGACCGACACGCTGCTCCCGGACATGAAGCTGGGGATCGACCTCGTGAAGGGGCGGAACCGGACGCTAACGGCGTGGAAGAGCCCGTCGGACCCCTCTCCGGGCCCCGTGGTCATGGCCATGGTCACGTCCGGCGACCCCCAGGTGTTCATCTGGAACGGCGACGACCTGGTCTGGCGCTCCGGCCCCTGGGACGGCGTCCAGTTCACCGGCGTGCCAGACACCGTCACCTACTCCGACTTCACCTTCAGCTTCATCAACAACGCCCAGGAGGTCACGTACAGCTTCCATGTGCACAACGAGTCTATCATATCGAGGCTGGGGCTGAACAGCACGGGGAACAACGGGCTGCTGCAGCGGTCGACGTGGGTGGAGGCGGCCGGGACGTGGAACCTCTACTGGTACGCGCCCAAGGACCAGTGCGACGCGGTGTCGCCGTGCGGGCCGAACGGCGTGTGCGACACCAACAACATGCCCGTCTGCTCCTGCCTGCGCGGCTTCGTCCCCAAGTCGCCGGCGGCCTGGGCGCTGCGGGACGGCCGCGACGGGTGCCTGCGGGCGACGCCGCTCGACTGCCGGAACGGCACCGACGGGTTCCTCACGCTCAGGCACGCCAAGGTGCCGGACACTGTGCGGAGCGCGGTGGACATGAGCCTCAGCCTGGAGCAATGCCGGCAGGCCTGCCTCCGGAACTGCTCCTGCACCGCCTACGCCAGCGGCAACGTCAGCGCCGACCGCCGCGCCGACGGCTCCGGCTGCGTCATGTGGAGCTCGGGGCTCACCGACCTGCGCGTCTACCCGGACTTCGGCCAGGAGCTCTTCGTCCGCCTCGCCGCCGCCGATCTAGGTGCAATAACAAGTAAATCCAAGAAGAACCACGTAATAATCGCGGTCGTCGCCTGCGTCTCCGTGCTGGCATTCCTTCTAGCACTCGCTGGTGTCTTCTTCTGGACAAGAGGGAAGAAGAAAGCAAGAAACACAGGATCGAGTAAGTGGAGCGGCGGTTCACGCAGTACTCCCCGCCAGTATGACGGAAGTAGTCACAACGATGACTTGGAACTGCCAATATTTGATTTGGGGACAATTGCAGCTGCCACTGATGGTTTCTCCATCGATAACAAGCTCGGCGAGGGTGGCTTTGGACCAGTATATAAGGGTAAGCTTGAGGATGGACAGGAAATAGCTGTTAAGACACTTTCAAAAACATCGGTGCAGGGTCTCGATGAGTTCAAGAATGAGGTTATGTTAATAGCTAAACTCCAGCACCGGAATCTTGTCCGGCTTCTTGGCTATAGCATCAGTGGTCATGAAAGGCTACTTGTCTATGAATACATGGAAAATAAGAGCCTGGACTACTTCCTATTTGGTAACCTCTCAACCTTTCGCTTTCTGACCCCAAATATTGGCTGA
>HvleckRLK36
ATGGCGACGCGCTTCTCCGCCGCCGCGCTGCCTTTGCTCCTAGGCTTCCTGCTCCTGCGAGGGGCCCCGTCCCGCGCCGCCGACCCCGACACCGTCGCCGTCAGCCGGCCGCTGTCCGGCGGACACAGGCTGGTGTCCAAGCGCGGCAAGTTCGCGCTCGGCTTCTTCCAGCCTGCAGGCTCCTCGCAGAGCTGGTACCTCGGCATTTGGTACAACCAAATCTCCAAGCACACCACGGTGTGGGTCGCCAACCGGGACGCGCCGGTCTCCGACCCAGCCTCCTCGCAACTCTCCATATCGAGCGACGGCAACATGGTGCTCCTCCACGGCGACCCTGTCAAGTCCCCGGTGCTCTGGTCCACGGACGTCGCCGGCATCGCCTCCCGCTCCACGGTCGGCGTCCTGCTTGACACGGGCAACCTCGTTCTGACGGACGCGTCCAACACCTCCGTCGTGCTCTGGCAGAGCTTCGACCACTTCGGCGACACGTGGCTGCCCGGCGGCAAGCTCGGCCGGAACAAGCGCACCGGCGAGGTCACGCGCCTGTTCGCGTGGAAGGGCTACGACGACCCGGCGCCCGGCGTGTTCGCCCTCGAGCTCGACCCGAACGGCACGAGCCAGTACCTGCTCAACTGGAACGGCAGCATGGAGTACTGGACCAGCGGCAACTGGACGGACGACGGGTTCACCGGCGTGCCTGAGTTGAAGGCCTATAGCAACGCCCCGAATTCCCAGTACAAATTCGGGTACGTCGACGGCGAGGACGAGAGCTACTTCTTGTACGACGTCAAGGACGAGGCCGTCGTGACGCGGTTCCTGGTGGACGTGACGGGTCAGATCAAGTTCCTGACGTGGGTTGAGTCAGCCGGCGAGTGGATCCTCTTCTGGACGCAGCCCAAGGTGCAGTGCGACGTCTACGCGCTCTGCGGGGCCTTCGCCGCGTGCGTCGAGAACGAGCTGCCATCGTGCCGCTGCCTACGCGGCTTCCGCGAGCGGCGGTCACTGGCATGGCTGCAGGGCGATCACGCCGAGGGCTGCGTCCGGGACACCGCGCTGCAGCAGTGCGGGCGCGGCGGCGGTGCCCAGGGCGCCACGCGGCAGACGAAGAACGACGACGGTTTCTATTCCATGCCCAACGTGAGGCTCCCGAGCGACGCGCGGGGTGTCGCGGCCGCGGCGACTGCTCGTGACTGCGAGGTAGCGTGCCTCGGTGACTGCTTCTGCACCGCCTACTCCTACAACGGTAGCTGCTGGCTCTGGCATGGAGGTCTCGTCAACCTCCAAAGCACGAGCAGCACTGGCACCGGAGGCGGCAGTGGCACCATCCTCATTCGGCTGGCCGCGTCCGAGCTCACTGGCACTGGGCGCACCAGGACACTGATCATCGCGCTCGCCGTCGTCGCGGCCGCCGTGGCCGCAGTCACCGTTGCCGTTCTCGTGTCAGTCTTCGTTCTGAGGAGGAGAAGGGTGAAGGCGCAAGGGAGAGTTGTGGAAGGTTCGCTGATGGCGTTCACGTACCGCGACATGCAGTCCGTGACCAACAACTTCTCGGACAAGCTCGGCGGCGGCTCCTTCGGGTCGGTGTTCAAAGGGTCGCTCCCGGACGCGACGGCGATGCTGGTGGCGGTGAAGAAGCTCGAGGGCGTGCGTCAGGGGGAGAAGCAGTTCCGCGCGGAGGTGAGCACGATCGGCACCATCCAGCACGTGAACCTCATCCGGCTGCTGGGGTTCTGCTCCGAGGGGAGACGGAGGCTGCTCGTCTACGAGCACATGCCCAACGGCTCCTTGGACAGGCACCTCTTCGGGCCCAGCCCCGGCCATGGCATCCTGAGCTGGGAGAAGAGGTACCAGATCGCTCTGGGCATCGCGAGGGGACTCGACTATCTGCACGAGAAATGCAGGGACTGCATCATACACTGCGACATCAAGCCGGAGAACATCCTCCTCGACGACGCGTTCGCCGTGAAGGTGGCGGACTTCGGCCTCGCGAAGCTCATGGGCCGGGACATCAGCCGCGTGCTGACCACGATGAGGGGCACGGTGGGGTACCTGGCGCCGGAGTGGATAACCGGCACGGCCATCACGGCCAAGGCCGACGTGTTCAGCTACGGCATGCTGCTGTTCGAGATCGTGTCCGGCAGGAGGAACGTGGAGCAGCGGCCGGATGGCACTGTGGACTTCTTCCCGTCGACGGCCGCGAGCCGGCTCCTGGACGGCGACGTGAAGAGCACGGTGGACAGGCAGCTCGACGGCGACGCTGACATTGCCGAGGTGGAGCGGGCGTGCAAGGTGGCGTGCTGGTGCGTACAGGACGAGGAGGGCGAGAGGCCGAGCATGGGCACGGTGGTGCAGGCACTCGAGGGGCTCGTCGATGTCAGCATGCCGCCTGTCCCGAGAATGCTCAAAGTGCTCGGGGATCCAGACAACTACGGCAAGTTCTTTTCAGGGTTGCCGTCGACGTGA
>HvleckRLK37
TATTTATCGGAACCAGGAGGATGCAGGCAAACCAATCATACACGGATCGTAGCAAAATCCTCCAATTTGCATGCCACCATGCTCCTCCTCCTGGTCCTCCTGCTCTTCTCCAGCCTACAGCTCTCCACGACTGCCATCGACACCCTCGCTCTAGGCCAAGCACTCCCATGGAACGAGACACTGGTGTCCAAGGGCGGCGACTTCGAGCTCGGCTTCTTCTCCCCCGGCAACTCCGGCAAGCACTACGTCGGCATCTGGTACAAGAAGATCTCCAAGCAAACGGTCGTCTGGGTGGCGAACCGAGAGCACCCGGTCGTCAAACCGTCGACCTCCCGCTTTATGCTCAGCATCCACGGCGAGCTGCTTCTCCTCACGACGCCGTCGGACACCTTGCTGTGGTCATCCAACGCGTCCTCCCGGTCACCCCCGAGCACCACCGTGGCCACGCTCCAGGACGACGGCAACCTCGTGGTGAGGCGGAGCAACACGACGTCGTCGTCTGCCTACGTGGTGTGGCAGAGCTTCGATCACCCCACCGACACCTGGCTCCCCGGAGCCAGGCTCGGCTACAACAGGGGTGCCGGCGTCCACAGCTTCCTCACGTCGTGGACGGATGCCGAGAACCCGGCGCCCGGCCCGTTCACGATGGAGATCGACGCGCGTGGGCAGCCCAAGTTCGACCTGTTTTCCGACGCCGGCGGCGGCGAGCACCGCCAGTACTGGACGACCGGCCTGTGGGACGGCGAGATCTTCGTGAACGTGCCGGAGATGCGATCGGGCTACTTCTCCGGCTTCCCCTACGCGCGCAACGGCACTATTAACTTCTTCAGCTACCACGACCGGATCCCGATGATGGGCGCCGGCAACTTCATGCTTGACGTCAACGGGCAGATGCGACGGCGCCAGTGGAGCGACATGGCAGGGAATTGGATCCTCTTCTGCTCGGAGCCGCACGACGCCTGCGACGTCCACGGTTCGTGCGGCCCTTTCGGGTTGTGTAGCAACGCCACCAGCCCCGCGTGCCAGTGTCCCGCCGGCTTCTTGCCGCGGTCGGAGCAAGAGTGGAAGCTTGGGAACACCGCCTCCGGATGCCAGAGGCGGACCTTACTGGACTGTACCAAAGACAGGTTCATGCAGCTTCCGAACCCCGTGCAGCTCCCGAATGGCTCGTCGGAGGCCGCCGGAGTTAGGGGTGACAGGGACTGCGAGCGCACTTGCTTGAAAGATTGCTCATGCACCGCCTACGTTTACGACGGAACCAAGTGCTCCATGTGGAAGGGCGATCTCGTCAACTTGAGGGCACTCTCGATTGACCAAAGTGGCGATCCTGGCCTCGCCGGAGCTGTTCTTCACCTCCGCGTCGCGCACTCGGAGGTGGCAGCGTCGTCATCGTCACCGACGCATTCTTGGAAGAAATCGATGGTGATCCTCGGGAGCGTAGTTGCGGCCGTGGTGGTGCTCCTGGCAAGCCTCGTGATCGGGGTGGTGGCGGCGGTGATGCTGCGGAGGCGGCGGGGGAAGGGGAAGGTGACGGCGGTGCAGGGGCAGGGCTCGCTGCTGCTGTTGGACTACCAGGCCGTGAGGACAGCGACGAGGAACTTCTCAGAGAAGCTCGGTGGCGGGAGCTTCGGCACGGTGTATAAGGGAGCGCTCCCGGACGCGACGCCGGTGGCTGTGAAGAAGTTGGATGGGCTCCGGCAGGGCGAGAAGCAGTTCCGAGCCGAGGTGGTCACCCTCGGCGTGGTCCAGCACGTCAACCTCGTACGCCTCCGGGGCTTCTGCTCCGAGGGGAACAAGAGGGCGCTCGTGTACGACTACATGGCCAACGGCTCGCTGGACTCGTACCTGTTCAAGAGCGGCGGGTCGGCGGCCAAGGTGCTGAGCTGGGGGCAGAGGTACGGCGTCGCGCTGGGCATGGCCAGGGGACTGGCCTACCTGCATGAGAAGTGCCGCGAGTGCATCATACACTGCGACATCAAGCCGGAGAACATCCTCCTCGACGACGAGCTGGGCGCCAAGCTCGCGGACTTCGGCATGGCCAAGCTCGTGGGCCACGACTTCAGCCGCGTCCTGACCACGATGCGCGGCACGCTCGGGTACCTCGCGCCGGAGTGGCTCGCCGGCTCGCCGGTCACCGCCAAGGCGGACGTGTACAGCTTCGGCCTCGTGCTGTTTGAGCTCGTCTCCGGCCGGCGCAACAACGGCCAGTCGGAAAAGGGAGGCTACGGGATGTACTTCCCAGTGCACGCCGCGGTCAGCCTGCATGAGGGCGACGTGGTCGGGCTGCTCGACGAGAGGCTGGACAAGGAGGCCGACGTGAAGGAGCTGGAGAGGATCTGCAGGATCGCCTGCTGGTGCATCCAGGACGAGGAGGCTGACCGGCCGGCCATGGGACTCGTCGTGCAGCAGCTTGAAGGAGTCGCCGACGTCGGGCTACCGCCGGTCCCATCCAGGCTTCACATGCTGGCAAAGGTGAACGCAGGCGCCATTGGAGGTGAACCGGATGAATTCGATTCAGAGAGCAGTAACAAATTAGCAACAGAGAAAGCGTAA
>HvleckRLK38
ATGCGCCGGTCGGTCGGTCCCATGGCGCTCCTCCTCCTCCTCCTCCCGATCGCGCTGCTCGCCGGCGGGCTGAGGGAGGCGGCGGCGCGCACGGTGCCGGTGGAGTTCCTCTACCCGCCCTACAACCTCACCTACATGCACTACATCGACACCAACGGCGTCTTCCTCCGCTCCCCCAACGCCACCTTCTCCGCCGCCGTCTTCAACTCCGGCTCCTCCGACTCCTCGGGCGCCGACGAGTCGCAGCTCACCATGTCCCGCTACTTCTTCTCCGTCCTCCACGACCGCTCCCGCACCCCCGTCTGGGCCGCCGCCGCCGGCGCCACCATCGTCCAGTCCATCATCCTCTCCCTCAACGCCTCCGGCCTCTACATCTCCGACCCCGCCGGCCTGTCCGGCCCCTCCTGGTCCACCCCCCGCCTCGCCGCCCCCGTCGCCGCGCTCCGCCTCCTCGACACCGGCCAGCTCGCGCTCATCGACGCCGACAACGCCACGCTCTGGTCCACCTTCGACGCGCCCACCGACACGCTGCTCCAGGGCCAGCTCCTCCCCGTCGCCGTCCCGCTCACCGCCACCGCCTCCGACCAGGACCTCTCCCCCGGCGCCTACCGCCTCCTCCTCACCCCCGCCGACGCGCTCCTCCAGTGGGCCTCTTCCGACGGCGGCGGCGACTTCGTCACGTACTGGGCGCTCTCCTCCGACCCGGCATCCGTCCAGGACTCCAACCGCGCCGTGCGATCCATGATGGTCAACGCGTCCGGCGTCTTCCTCCTCGCCGACGGCGGGGGCACCGTCTTCAGCCTCCGCTTCGCGTCGTTGACCCCCGCGCCGGCAACAAAGATGCTCCTCAAGGTCGACTCCTCCGGCCGCCTGCGCGCGCTCAGCACGGCCTACTCCCCCACGGCGGCGCGCGCCACGCTGCCCGCC
>HvleckRLK39
AGCATGCCTCCCCTCTACATACTACTAGGGCTTCTCCTCTTGCACACTCCTCTTTGGTGCTTCTCCGCAGCTGCATATGAAGACTCTCTCACGGCAGGCCAAGTGCTCGCCGTCGGTGAAAAGCTCGTCTCAAGAAATGGCAAGTTCGCTGTCGGCTTCTTCCAGCCAGCAGCAAGCATCATCAGTAAGTCGTACCACAGTGCCACTTCCCCCAGCTCCAGCTGGTACCTTGGCATATGGTTCAATAAGATCCCAGTTTTTACTACCGTGTGGGTTGCTAATAGGGATCAGCCCATCACAAACCATAGTGTCAACCTAACACAGCTCAAGATATCAAGCGATGGCAATCTTGTCATCGTAAACCATGCCGCCAAAACTGAATCCATTGTTTGGTCCACTCACATTCTCAATAGGAAAACCAGTAGCATAAACACCACCACATCTAGCTCCGTTGTTCTCTTGAACAGTGGAAACCTTGCCCTGCTCGCAAGTAGCCAAGAGATTTTGTGGCAGAGCTTCGACTATCCAACAGATATCGGGCTTCCTGGCGCCAAGTTGGGCCGGAACAAGGTCACTGGTTTCAGTCGCCAGTACATATCAAAAAAGAGCCTCATTGATCCAGGTCTTGGCTCATACAGCATAGAACTAAAAGATACCAGTGGGATTGTCCTCATGCGCCGCAACAACCCCTTGGTAAAGTACCTGACTTATGCAACCACGGGATCATCAACTTTGATTCCAATACTCAAGTCATTACTAGATTTGAAACCTCGGACCAAAGGTTTGATTAACCCAATATATGTTGATAACAACCAAGAGGAGTACTACACGTACACTTTACTTGATGAATCATCAACTTCCATGTTTGTCTTACTAGACATCTCTGGTCAGGTCAAGCTGAATATTTGGTCACAATCCAACCAGTCTTGGCAAACCATATATTCCGAGCCAGCAGATCCCTGCAGTCCGCCTGCTACGTGCGGACCTTTCACGGTCTGCAACGGCAATGCAAATCCATTATGTGACTGTATGGAGAGCTTCTCCCTTAAGTCACCGCAGGATTGGGAGTTTGAGGATCGAACAGGAGGGTGCATTAGAAACACACCGTTACATTGCAGCACTAGTGGCAACAATAGAAACATGACAAGTTCATCAGACATGTTCCACCCCATTGCTCAAGTTCAATTGCCCTACAACCCGCAAATAATAGATGTTGCTACCACTCAGAGCAAATGTGAAGAAGCATGTCTTGTTTCCTGCTCCTGCACTGCTTATTCCTATAACAATAGCAGATGCTTTGTCTGGCACAGGGAATTGCTTAGTGTAAATCTGAATGATGGCAATGATAATAATTCTGAAGATGTTCTTTACCTTCGCCTTGCCGCCAAAGATTTGCTCCCAGGTTCCAGAAAAAAAAAAAGTAAACCAAATGTGGGAGTTATTACTGCTGCAAGTATTATTGGTTTTGGGTTACTAATGTTCGTGCTGTTGTTACTGGTTTGGAGGAACAAATTCAAGTGGTGTGGTTTGCCTTTATACGGAAATCAAGGTAGTGCTGGTGGAATTATAGCCTTCAGATACACTGACTTAGTTAGTGCCACTAAAAACTTCTCACAAAAGCTTGGAGGTGGTGGTTTTGGTTCGGTATACAAGGGAATGTTAAGTGAGTCGACAATTACTATAGCAGTGAAAAAGCTTGATGGTGACCGCCAAGGAGAGAAGCAATTCAGGGCGGAGGTGAGCTCAATTGGACTGATCCAACACATAAACCTAGTCAAATTGATTGGTTTCTGCTGTGAAGGCAACCACAGATTACTTGTGTATGAACACATGTTTAATGGATCTCTTGATGGTCATCTATTTAAGAAGAGCAATGTTGATATTGCCGTCCTAAGTTGGAACACCAGATATCAGATAATCCTAGGAGTTGCTAGAGGATTATCATACTTGCATCAGAGTTGTCGTGAGTGCATCATACACTGTGATGTGAAGCCAGAGAACATACTTCTGGATGCATCATTTGTTCCTAAAGTTGCAGACTTTGGGCTGGCAGCGTTCGTGGGAAGGGATTTCAGCCGAATTCTGACTTCATTCAGAGGAACTGCAGGCTATCTTGCCCCTGAGTGGCTTACCGGTGTGGCAATCACATCGAAAGTCGATGTTTACGGCTTTGGCATGGTTCTGTTGGAAATCATATCTGGAAGGAGGAATTCCTCACCTGAAGAATCATATAACACTAGCAGCAACAGTAACCAGAATGTTATATATTTCCCTATTCAAGCCATCAGCAAACTTCACGGCGGAGATTTGAAGAGTTTGGTGGATCCACAGTTACATGGTGACTTCAACTTGGAAGAGGCTGAAAGGGTTTGCAAAGTTGCATGTTGGTGCATCCAAGATAATGAGTTGGATCGGCCAACAATGGGTGAAGTGGTCCGGGTTCTCGAGGGTCAACAAGAGATTGATGTGCCCCCAATGCCAAGATTTCTTGCAGCTATAACGGAACAATCTGGTGCTCCAACTTTAATGTAA
>HvleckRLK40
ATTCCTTCTGCAAAAATCGATGGAGTGGTCAGCTCTTGCCTGCTCCGTCACGGTCCTGATCCTTGCATTCCTNNNNNNNNNNNNNNNNNNNNNNNNNNNNNNNNNNNNNNNNNNNNNNNNNNNNNNNNNNNNNNNNNNNNNNNNNNNNNNNNNNCGCTCTTCCCCGGAGCCACCATCGTCTCCGACGGCGGTGACTTCGCCTTGGGCTTCTTTGCCCCATCCAGCTCAGCTCCGGCCAACCTGCACCTGGGCATCTGGTACAACGGCGTCCCTGAGCTCACCGTGGTGTGGGTCGCCAACCGGGAAATCCCAGTCACCAACAGCACTGCACCCAGGCTCTCCCTCACCAACACCTCCGACCTTGTGCTCTCCGACGGTAATGGCAGCGACACTGTCGTTTGGAGGACTAGCGTGGCTGCTGCTCCGAACTCCACTTTATCAGAGGCAGTGCTTCTCAACACCGGCAACCTCGTCGTCCGGTCGCCAGATGGCACCACGCTGTGGCAGAGCTTCGACTACCCGACCGACACGATGCTGCCGGGCATGAAGATGGTGATCAAGCACGGCACGCGTGCCGGTGAGCGCCTGGTGTCCTGGAAGGGCCCCGGCGACCCATTGCCGGGGAACTTCTCCTACGGCAGCGACCTGGCCACGTTCCCACAGATATTCCTCTGGGAAGGCACGCGCCCGGTGTACCGTAGCACGCCGTGGACGGGGTACAGGGTGAAGAGCGAGTACCAGTTCCAGACGACCAACACCAGCTCCATCATCATCTACCTTGCCGTCGTCAACGACGACGACGAGAGCTACACAGTCTACACCGTCTCCGACGGCGCCTGGCTCACCAGGTTCGTGCTGACCTACTCCGGCAAGCTCCAAATCCGGAGCTGGAACGCCAGCTCGTCAGCCTGGGCCGTCCTCGGGCAGTGGCCGCCTTACCGGTGCGACCTCTACGGCTATTGTGGCCCCAACGGGTACTGTGACGACACGGCGCTGCCCGTGCCGACATGCAGGTGCCTCAACGGTTTTGAGCCGGCAAGAACGGAGGACTGGACCAGCGGGACGTTCTCCGACGGGTGCCGTCGGGAGGAGGCGGTGAGTGGGTGCGGTGCCGGTTTCTTGGCGTTGCCGGGGATGAAACCGCCGGATGGTTTTGCGCTTGTAGCGAACAGGACGCCGGAGGGGTGCGCGGCGGAGTGCGGCCGCAACTGCTCCTGCGTCGCGTACGCTTACTCCAACTTGACCGGCGGCGCATCTACCGGAGACATGACGAGGTGCTTAGTTTGGGCCGGGGAGTTGGTCGACACCGGGAAGCCGGGCGCAAGCCCCGCCAGCGACACGCTCTATCTCCGGCTTGCAGGACTGGACGCTCCAGCTGGAAGAAGAATAAAGAGCAATGCAACGAGGATTATACTGACGGCCCTAGGAAGCAGTGTGGTGATAATCACGTGCACTTTCCTTGCATGGTTGAAATTCAAAGGCAAGAACATGAAGTGGGGAAAACAAAAGAAGCCGAAGTCGGATGGTTCTGGTGACCTTGAGGTTCCCTTTGTAAGATTTCATGAAATTTCACACGCAACACAAAATTTCTCCGAAACTTGTATGATTGGACAAGGAGGCTTTGGCAAAGTTTATAAGGGAACACTAGGCGGTCAACAAATTGCTGTAAAAAGGCTAAGTTGGGATTCTCAACAAGGGACAATCGAGTTCACAAATGAAGTAGCACTTATTGCCAAATTGCAGCACCGTAATTTGGTTCGACTACTTGGATGTTGTGTGGAAGGAGATGAAAAGTTGTTGATTTATGAGTACATGCCTAATAAAAGCTTAGATGACACACTTTTCGGTATAATTTAG
>HvleckRLK41
CAACATCCATCCATCCACCTAGACTTCTTCTCTTCTCCAACAGCTAACCTCACGCCGATCTCCATGCCTCATTTGCTCTACATATTACTCGGGCTTCTCTTCATGTCACACACAGTTCCTTGGTGCTCTTCTGCAAGGGACACTCTCATGGCAGGCCAAGCTCTAGCTGACGCCGGTGGCAGCAAGCTCGTCTCAAGAAACGGCAAGTTCGCGTTGGGCTTCTTCCAGCCAGCTAACACTGCATGCACCATCAGCGGTAGTAAGTTCCACCACAACACCAGCTCCAGTTGGTACCTTGGCATATGGTTCAATAAAATCCCAGTTTTTACTACTGTGTGGGTAGCTAATAGAGAGCAGCCCATCACCCATCCCCAACTCAACTCAACGCAGCTCAAGATCTCAAGTGATGGAAATATTGTCATTGTAGTAAATCATTCTGATGCCGGCAAGGAATCCGTTGTTTGGTCCACTCACATTGTCAATATGACACAAACCAACAACGAAAACTGTAGTTCCATTGTTCTCTTGAACAGCGGAAACCTTGCCCTACTCACAAATAGCCAAGAGATGTTGTGGCAGAGTTTCGACTACCCAACAGATGTTTTGCTTCCCGGCGCCAAGTTTGGTCGGAACAAGGTCACTGGCTTGAGTCGTTCAATCATTTCGAAGAAGAGCCTCACTGACCCAAGTCTCGGCTCATATAGTGTTGAACTAGAAGGCACCAGCGGGGTCGTCCTCAAGCGCCGCAACAACCCCTCCGTAGTGTATTGGCAGTATGCATCATCTAAGCAATCATCATTGATACTCAAGTCACTGGTAGATTTGGAACCTCTCGGGAAACGATTGATTAACCCAACATATGTTAATAACAACCAAGAGGAGTACTACATGTACACTTGTTTGGATGATTCATCTTCCACATATGTGTCACTAGACATCTCTGGTCAGATAAAACTGAACTATTGGTTGCAAGTCAAACAGTCTTGGGAAACCATACAAGCTCAACCTGACGATCCATGCACTACTCCTGCCACATGCGGACCTTTCACAGTCTGCAACAACAATGCATATCGATTATGTGATTGTATGGAGGGCTTCTCTAAGAAGTCACCGCTGGACTGGGAGTCTAATGATCGAACAGAAGGATGCATCAGAAATACACCACTACATTGCAGTACTAGTGACAAAAACATAACAAGTTCAACTGACGTGTTTCATCGCATTGCTCAAGTCAAATTGCCCTACAATCCCCAAATAATAGTCGTTTCTAGCAACCAAAGAAACTGCAAAGAAGCTTGCCTTAGTTCATGCTCCTGCACTGCTTATTCCTTTACCAATCAAGTATGCTCTATTTGGAACGGAGAATTGCTTAGTGTAAATCTGAATTATGGCACTGGTAATAGAGTTGAAGATGTTCTTTACCTTCGCCTTGCCGCAAATGATTTTCTACTAAGTTCGAGAGAAAATAAAACAAAACCAAACATTGGAGTCATTACTGCTGCAAGCGTTATTGGTTTTGGATTACTAATGCTCATAGTTTTGTTACTGATTTGGAGGAACAGATTCAAGCGGTTTTGTTTGCCTTTATATGACAATCAAGGCAGTTGTGGAGGGATTATGGTCTTTAGATACACTGATTTAGTCCATGCTACTAGAAACTTCTCAGAAAAGCTAGGAGGTGGTGGTTTTGGTTCTGTATACAAGGGAGTACTAAGTGACATGACTAGCATAGCAGTGAAAAGGCTTGATAATGCCTATCAAGGAGAGAAGCAATTTAGAGCAGAGGTGAGCTCAGTTGGCCTGATCCAACATATCAACATAGTCAAATTGATTGGTTTTTGCAGCGAAGGTGATAAAAGGCTACTTGTGTATGAACACATGTTAAACGGATCTCTTGATGGTCATCTATTTAAGAAGGACACTGCTAATGTTGTTGTCCTAAGTTGGAACACCAGATATCAAATAACCCTTGGAGTTGCAAGAGGATTGTCCTACTTGCATCATAATTGTCATGAATGCATCATACATTGTGATATTAAGCCAGAGAATATACTTGTAGATGCATCATTTGTTCCCAAAGTTGCAGATTTTGGGTTGGCAACATTAGTGGGAAGGGATTTTAGTCGAATCCTAACCACATTAAGAGGAACTGTAGGTTATATTGCCCCAGAGTGGCTTAGCGGAGTTGCTATTACATCGAAAATTGATGTTTATAGCTTTGGTGTGGTACTTCTGGAAATTTTATCTGGAAGTAGGAATTCACCAGAAACATACAACACTAGCAAGAGCTACTATATCAGATATTTTCCAATTCAAGCCATCAACAAGCTTCAGGGTGGTGACGTGCGAAGTTTGGTGGATCCGCAATTACATGGTGACTTCAACTTGGAAGAGGCTGAACGGATTTGCAAAGTTGCATTTTGGTGCATCCAAGATAATGAGTTTGCTCGTCCAACAATGGGTGAAGTGGTCAAGATTCTCGAAGGTCTGCGGGAGATTGATATGCCCCCGATGCCAAGACAACTTGCTGCTATGAAGGAACACTATGATACAACCTCTTCAATGTACATAGTAAACATGCATAGTCGATGTGACTAA
>HvleckRLK42
ATGCGGCCGTCATGGGGGGATCTCGCCGTCGTCTGGTGCTGCTTCTTGCTCCTCCTGCTCCTCCCTTTCCTGTCCCATGGCAAGGACATGCCCCTGGGCTCCACCCTCACGCCGGGCGGCAACTCGGCGGCGTGGGCCTCGCCCAACTCCACCTTCTCCCTCGCCTTCGCGCCGTCCCCGACCTCCCCGTCGCTCTTCGTCGCCGCGGTCACCTACGCCGGCGGCATCTCCATCTGGTCCGCGGGCGCCGGCGCGCCCGTCGACTCGGGGGGCTCGCTCCTCCTCTCCTCCACCGGCGACCTGCAGCTGGTCAACGGCTCCGGCGCCGTGCTCTGGTCGTCCGGCACCGCCGGCCGGGGCGTCTCCGCGGCCGCCCTCCAGGAGAGCGGCAGCCTCGTGCTCAAGAACTCCACGGGCGGCGCCGTGTGGCAGTCCTTCGACCACCCGACGGACACCGTGGTCATGTCCCAGAACTTCGCGTCCGGCATGAACCTCACCTCCGGCTCCTACGTCTTCGCCGTCGACCGGGCCACCGGCAACCTCACGCTCAAGTGGGCCAACGCCGGCTCCGCCACCGTCACCTACTTCAACAAGGGCTATAACTCCACCTTCACCGCCAACAGGACGCTCAGCTCCCCAACGCTCACGATGCAGACCAACGGCATCGTCTCCCTCACCGACGGCACGCTCAACGCACCCGTCGTCGTCGCCTACAGCAGCAACTACGGCGAGAGCGGCGACATGCTGCGCTTCGTGCGCCTCGACTCGGACGGCAACTTCCGCGCCTACAGCGCCGGGCGCGGCAGCGGCACGGCCACCGAGCAGTGGTCCGCGGTGGCGGACCAGTGCGAGGTGTTCGGCTACTGCGGCAACATGGGCGTGTGCGGCTACAACGGCACGTCGCCGGTGTGCGGGTGCCCGTCGCGGAACTTCCAGCTCAACGACGCCTCCAACCCCCGAAGCGGGTGCAGGCGCAAGGTCGAGCTCCAGAACTGCCCGGGCAACTCCACCATGCTCCAGCTCGACAACACGCAGTTCCTCACCTACACGCCGGAGATAACCACCGAGCAGTTCTTCGTCGGCATCACCGCGTGCCGCCTCAACTGCCTCTCCGGCAGCTCCTGCGTTGCCTCCACCGCGCTCTCCGACGGCTCCGGCCTCTGCTTCCTCAAGGTGTCCAACTTCGTCAGCGCGTACCAGTCGGCGTCGCTCCCCAGCACGTCCTTCGTGAAGGTCTGCTTCCCCGGCGATCCCAACCCGCCCGTCAGCGCCGGCAGCACGTCCTCCTCGCGGTCCTCCGGCCTCCGCGGGTGGGTCGTGGCCCTGGTCGTCCTCGGCGTGGTGTCCGGGCTGGTCCTCGCCGAGTGGGCGCTGTGGTGGGTGTTCTGCCGGAACAGCCCGAAGTACGGGCCGGCGTCGGCGCAGTACGCGCTGCTGGAGTACGCGTCCGGCGCGCCGGTGCAGTTCTCGTACCGCGAGCTGCAGAGATCAACCAAGGGGTTCAAGGAGAAGCTGGGCGCCGGCGGGTTCGGCGCCGTGTACCGCGGCGTGCTGGCGAACCGGACGGTGGTGGCCGTGAAGCAGCTGGAGGGGATCGAGCAGGGGGAGAAGCAGTTCCGGATGGAGGTGGCCACCATCAGCAGCACGCACCACCTCAACCTGGTCCGCCTCATCGGCTTCTGCTCCGAGGGCCGGCACCGGCTGCTCGTCTACGAGTTCATGAAGAACGGCTCGCTCGACTCCTTCCTCTTCGGCGCCGGCAGCAACAGTAACGACAGCGGCAAGGCGATGTCGTGGGCGACGCGGTTCGCGGTGGCGGTGGGCACGGCGCGAGGCATCACGTACCTGCACGAGGAGTGCCGGGACACCATCGTGCACTGCGACATCAAGCCGGAGAACATCCTCCTCGACGAGCAGCACAACGCCAAGGTGTCCGACTTCGGGCTCGCCAAGCTCATCAACCCCAAGGACCACCGGCACCGGACGCTCACCAGCGTGCGCGGCACCAGGGGGTACCTGGCGCCGGAGTGGCTGGCCAACCTGCCCATCACCGTCAAGTCGGACGTGTACAGCTACGGGATGGTCCTGCTGGAGACGGTGAGCGGGCACCGGAACTTCGACATCTCGGAGGAGACGAACCGGAAGAAGTTCTCGGTGTGGGCGTACGACGAGTACGAGAAGGGGAACATCCTGCCGATCGTGGACCGGCGGCTCGCCGGAGAGGAGGTGGACATGGCGCAGGTGGAGCGCGCGCTGCAGGTGAGCTTCTGGTGCATCCAGGAGCAGCCGTCGCAGCGGCCGAGCATGGGGAAGGTGGTGCAGATGCTGGAGGGGATCATGGAGCTGGAGCGGCCGCCGCCGCCCAAGTCGTCGGACAGCTTCATGACGGTGACCACGGCCACCACGGGCGGCTCCGCCAGCGGCGTCAGCAGCAGCGTGGCGTCCACGTTCGCCTCGTCGGTGGCGGCGCCGCCGGCGCCCGTGCCGTCGCCGAACGTCGAGCAGGAGATGTCCGTGGGGCGGTCGGCATCCGCCCGGACCCGCGAGATCGCGTCGCTGCCGCTGCGCTCGTCGGAGCCATACATGACAATGTAG
>HvleckRLK43
GGGAACGACGGCAACCTGCTCATCCAGCTCCCGGACGGCACGGTTGGGTGGCAGAGCTTCGACCACCCGACGGACACGTTCCTGCCGGGGATGAAGGTGCGGGTCAGCCACCGGACCGGGAAGGGCGACCGGATCGTGTCCTGGAGATCCCCCGATGACCCGGCGCCGGGGCGCTTCTCCTACGGCCTGGACCCCGGCACGTCGCTGCAGCTGCTCATGTGGAACGGCACGCGCCCCTACTGGCGCAGCCCCGTCTGGAAGGGGTACGCCGTCGCCACCATGTACGTCAGCGCCGGCACGGTGATCTACACGGCGATAGTCGACACGGACGAGGAGATCTCCTTGGCCTTCTCCGTCTCCGGCGGCGCCGCGCCCACGCGGTACGTGGTGACCAGCTCCGGCAAGTTCCAGCTGCTCATCTGGAACGGCACCAGGTCGGCCTGGGCCACGCTCCAGTCGTGGCCCTCCAGCGAATGCACCACGTACAGGCACTGCGGCGCGTACGCCTACTGCGACACCACGGCGGCGCCGGCGACGTGCAGGTGCCTCGACGGCTTCGAGCCTGCTAAACCGGCAGAGTGGACCTCCGGCAGGTTCGGGCAGGGTTGCCGACGGAAGGAGGCGCTGCCGCCGTGCGGCGGCGGAGGCGGCGGCAATGGGGTGGGTTTCATAGCCATGCCCAGCATGAAGGTGCCGGACAAGTTCTCGCTGGACGCTGGCAACCGGAGCGCGGAGGAGTGCGCGGCGAGGTGCGCCGGCAACTGCTCGTGCGTGGCGTACGCGTACGCCAACCTGCAGAGCAGCAGCGCCAAGGGGGACGTGAGCCGGTGCATCGTGTGGGCAGGGGAGCTCGTGGACGCGCAGATGATCGACCCGCGCTGGGGCGGCGAGACCCTCTACCTCCGCGTGCCCGCCGCTGCCGCTTCCACTTCCCCAGGTGGAAAGGCCAGCAGAAATGCAGTGAAAATAGCAGTGCCGGTGGTAGCATCTGCCCTGCTGCTCACATGCATTTTCTTTGTATGGTTCTGCAGATACAGAGACAAGAGAAGGAAAACCGAGAGCCAGAAGAAGCTAATGCCCGGGATCAGGACCGGGACCACAAACACGTCGAGCGAGATCGGAGAAGGAGATCGCACCGGAGACCTTGAGTTCCCCTCCATAGGATTCGGCGACATCGTCGCCGCCACGGACAACTTCTCCAAGACACTCATGATCGGCCGCGGAGGCTTCGGCAAGGTCTACAAGGGAACATTAGACGGTGGTCATGTGGTAGCAGTGAAGAGGCTGAGCAAGGATTCGGATCAGGGAGCAGAGGAGTTCAAGAACGAGGCGATCCTGATCGCCAAGCTGCAGCACCGGAACCTGGTGCGCCTCCTCGGCTGCTGCACCGAGGGGGGCGAGAAGCTGCTCATCTACGAGTACCTGCCCAACAAGGGCCTCGACGCCATCCTCTTCGACAGTGGGAGGAAGTCGGTGTTGGACTGGCCGACGCGGCTGGGGATCATCAAGGGGGTGGCCAGGGGGCTGCTCTACCTCCACCAGGACTCCAGGCTGACTGTGATACACAGGGACCTCAAGGCCAGCAACGTGCTGCTGGACGCCGAGATGCGGCCCAAGATCGCCGACTTTGGCATGGCCAAGATCTTTGGTGACAACCAGGTGAAAGCCAACACCCGGAAAGTCGTCGGAACATATGGCTACATTGCTCCCGAGTACTCGACGGAGGGCGTCTTCTCAGACAAGTCCGACGTGTACAGCTTCGGCGTGCTGCTCCTGGAGATCGTGAGCGGTATCAGGGTAAGCGCGACCGAGGGCATCATGGAGTTTCCAAGCCTGATATCCTATGCATGGCACCTGTGGAGAGAAGGGAAGGCAGGCAAGCTGGTGGATCCATCCATGGCAGGGAGCTGTTCACAGGATGAGGCTTCGCTGTGCATCCACGTCGGGCTCCTGTGCGTCGAGGACGACCCGAGCAGGAGGCCGCTCATGTCCTCCGTTGTGTCCATCTTGGAGAACGGGAGTGCGTCGGCGTTGTCCCTGCCGACGCCGGTGCAGCCTGCTTTTGTCGAAATGATGGGAGAGAAGAGCCAGAGAAGCGACCTCGAGAACACCAGGAACACAATGGCCATGACCGTTCTGCAAGGTCGGTAG
>HvleckRLK44
ATGGCTCCTCTCATGTTCTTTCTCCTGTTGGGCCAAATCCTGCTCTGCACAGGCGTCGACACCATCAACTCCGCCACACCGTTGTCCGGGTCACAGAAGATTGTGTCCCAGGGCAGCAAGTTCACCTTGGGCTTCTACTCCCCGCCCCAAACGCAAAGTAACACCATCTCTTTCACCTCTGGCAATTACTACCACATAGGCATATGGTACAGCACTGTACCACTGCTGACCCCCGTGTGGACGGCAACCGCCGACGTGCTGGTGTCTGACCCGACCACGGCGTCCTTGGAAATCGCCAAGGACGGCAACCTTGTCCTCCGTGATCATGCCAAGAACCGGCATCTATGGTCGACCAACGTGAGTATATCCTCCAACTCCACCATGGCCATCATCAGGGACAGTGGGAGCCTCGACCTCACCGATGCCTCCAATTCATCCATGGTTTATTGGCGAAGCGTAGACCATCCCACAGACACCTGGCTTCCGGGGGGCAAGCTCAGAATAAACAGGATCACTGGTGTGAGCAACAGGCTTGTTTCTTGGAAGAACAGCGGAGACCCATCGCCTGGGCTCTTCTCTGTGGAGCTAGACCCAAACGGCACTGCACAGTTTTTAATCCAGTGGAACGAATCCGTAAACTACTGGACCAGTGGCCTCTGGAACGGCAAGTACTTCAGCCATATGCCAGAGGGTACCAGTAATTTTTTTGACTTCCAGTTCGTCAACAACGCCACAGAAGCCTACCTCTTCTATTCGATGAAGGATGATTTACAAATCTGGCGGTTCGTCATTGACGAGAGCGGACAGATGAAGCACCTGACGTGGTTTGATTCCCTACAAGCATGGTTCGTGTTATGGGCCCAGCCACGGGCACCGTGCGACGTGTATGCGCTTTGTGGGGCATACGGCAGCTGCACCAACACCCTCAATGTCAGTGACACGTACTGCAACTGTTTTAAGGGGTTCAGCCAGAAGGTTCAGAGCGACTGGAACCTCCAAGATTACAGTGGTGGGTGCAAGAGGAACATACCATTGCAGTGTCAGACCAACTCGACTTCTGCACAGACTCAGTCTGATAAGTTCTATGTCATGGAAGATGTGAGGCTGCCTGATAATGCTCGGGGTGCAGTGGCTAAAAGCTCTCAACAATGTCAGGTGGCTTGTCTGAATAATTGCTCTTGCACTGCTTACGCTTACAGTTATGCCGGGTGCGTTGTTTGGCATGGGGACCTGATTAACCTCCAAAATCAAAACAGCGGAGAAGGACGAGGCACACTCCTCCTCAGGCTTGCAGCCTCCGAGCTGGGATACCCAAAGAAGAGAGAAACAGTGATCATTGCTTCAACTGTTGGTGGAGCTGCTGTGCTTTTGACAGCCCTTGCAATTGCGGTGTTCTTCCTATTTCAGAAACACCTCCGAGACCGAACTCCTCGGAAATCCAAGAATGCTGAGGTTGCACTGTCTGACTCCAGGTACAATGATCTGTTGGATGATATTCTAAGCATCGATTCACTTCTTCTTGATCTATCAACACTGAGGGTGGCAACAAATCACTTCGGCGAAGGAAATATGCTTGGTAAAGGAGGTTTTGGGATGGTTCATAAGGGAGTCCTACCCGACGGTAAACAAATAGCAGTAAAAAGACTATGTAAGAGTTCCAGACAAGGAATAGAGGAACTCAAAAGTGAACTTGTCTTGGTCGCTAAGCTTCGCCACAGGAACCTTGTGAGCCTCATTGGTGTTTGTTTGGAAGAACAAGAGAAAATACTTGTGTATGAGTTTATGCCCAACAGAAGCCTTGACACCATTCTTTTTGATTCTGAGAAACGCAAAGACCTAGACTGGGGAAGGAGATTCAAGATTATCAATGGGGTTGCTAGGGGACTGCAGTATCTCCATGAAGATTCTCAATTGAAGATAGTTCACCGTGACCTGAAAGCAAGCAATATTCTATTGGACTTTGATTACAACCCTAAGATTTCTGACTTTGGCTTAGCAAAGATATTTGGAGGGGATCAATCAGAAGATGTCACTCGGCGCATCGCTGGGACATACGGATACATGTCGCCTGAATATGCCATGCATGGTCAATATTCGGCAAGGTCTGACGCATTCAGCTTCGGTGTTTTGGTTTTGGAGATCGTCATGGGAAGAAGAAACAATGGCTCCTGCAACTCCGAGCAACATATCTATCTCGTAAATCTTGTATGGGAGCACTGGACCAGGGGAAATGTCATCGAGTTGATTGATCCATGCCTTAGCGACCATCCTTCTTTTCACGCTGACCAGGTCATGAAGTGCATCCAAATCGGGTTGCTGTGTGTGCAGAACAGGCATGAAGATAGGCCGGCCATGTCCTCGGTGAATGTCATGCTTAGCAGCCAGGGTGCTCGCCTCCCTTCTGTTTCCATGCCAGCCTTCTCTGACGGATTGCATGGACGCGGTGATAATAATTCAAAAGCGGCGTCCTCAAATGGAATGACCATCACAAAGATCGAGCCAAGATGA
>HvleckRLK45
GGCGAGCACGCGACATCATATAGCTGCGTGCAAACGCGACAGCAACCGCGTGTCACTCGCTCTCCGTCGCCATCTCTCCTCCTGATCGAGAATTCAATACACCTGAAGGATAACATGTCGCCGACGGTCGCCGCTTTCGCACTCGTTGCGCTATGCTTCGCTCATTCTTGCCCGGCAGCAGCGGCGGCGGAGTTGGACGCCGTCTCGGCGCGGCGGCCGCTGCGGGGCAACGACACGGTGGTCTCGCCGCAGGGCAAGTTCGAGGCCGGGCTCTTTAGCCCCGGCAGCTCCGGCCGGTTCTACCTCGGCGTATGGTACAAGAACATCCCCGTCCAGACCGTCATCTGGGTTGCCAACCGCGCGAGCCCCCTGTCCAGCGCTGACTCCGCCGAGCTCCGGGTGTCCGCCGACGATGGCAGCCTCGAGCTCGTCAGCCCCAGCGAGGGCGTCGTGTGGTCGTCGTCGAGATCGAACCTGTCGGAGGAGTCGAACAACAACAACAACACTGCGGTGATCCGCGACGACGGCAACCTGGTTCTCCTCGGCGGCGGCAACTCCTCCACCGTGCTCTGGCAGAGCTTCGACCACCCGACGGACACGCTGGTGCCCGGGGCGTGGCTCGGCGAGAACAAGCTCACCGGCGAGTACCAGAGGCTCACGTCGTGGCGGAACGCCGAGGACCCGGCGCCGGGCATGTTCAGCAACACCGTAGACCGCAACGGCACCAGCGAGTTCTTCTACTTCTGGAACCGGACACGCGTGTACTGGCGGAGCGGCGTGTGGACGGGCCGCGTCTTCGCGCTGGTGCCGGAGGCGGTCAACAACGTGCTCTTCAACCAGACCTACGTCGAGACGCCGGCGTACCGGCGGCTCAGCTGGGCGCTCTACGACAACGCGACGATCACGCGCCAGGTGTTCGAGGGCACGGGGCAGGCGAAGCAGTACATCTGGGTGCCCGCTAGCCAGCGCTGGCAGTTCTTCTGGGCCGCGCCCACCGTGCAGTGCGACGCTTACGCCGTCTGCGGCGCCTTCGGCGTCTGCGACCAGAGGAGCCAGCCGTCGTGCCGGTGCCCGCCCGGGTTCGTGCCGGCGTCGGAGCAGGACTGGGCGCTCAGCGACTGGACCGGCGGGTGCCGCCGGAACTCGTCGCTCGCGTGCGCGCGCAACGGCAAGGGATCGTCGTCTACGTCGACAGACGGGTTCCTGGCGCTGCCCAACGTTAAGCTCCCCGACGACTCGCTCGCCGTCGGCGGCGCCCAGAGCAAAACAGAGTACGAGTCGGCTTGCCTCGAGAACTGCTCTTGCCAGGCCTACACCTTCTCCGGCGGCGGCCAGTGCGCCGTCTGGCACGGCGAGTTCCGCAACCTTCAGCAGCTTTACGCCGACTCTGGGGCCTCGGGGTCGTCGGACGACCTGTATCTCCGGCTTTCAGAATCAGGGCTGCAAGATTTGAGCAGAGCAAACAAAAAGAAAGAGGGGCCGGCACTGCAGCTTGTCGTTGGAATCGTGTTGGCATGTGTGGCAGCAGCTTTGGTCGCGTCCGCGCTGCTAGCCTGGTTCCTTCTTTCCAGGAGGAGGCGGCGGCGGCGGCTGGACAGCATGGCGAACGAGGTATCCTCCTCCTTGGCCGTGTACAGCTACGGCGACCTACGCGCCGCCACCAAGAACTTCTCGGACCGGCTCGGCGGCGGAGGCTTCGGCTCCGTGTACCGCGGCGTCCTGAAGAGCGGGGACACCGGCACCGATGTGGCGGTCAAGAAGCTGGAGGGTCTCCGGCAGGGCGATAAGCAGTTCCGGACGGAGGTGAACACGCTCGGGCGCATCCAGCACGTCAACCTCGTCCGGCTCCTCGGCTTCTGCTCGTCGGCCGACGAGAAGCTGCTCGTGTACGAGTACATGCCCAACGGCTCCCTTGAGAGCTACCTTTTCAAGGGCAGCGGCGGCTCATGCCCGAGCTGGCGCGACCGGTACGGCATCATGCTCGGCGTCGCCAGGGGGCTGGCGTACCTGCACGACGGCTGCCGCGAGCGCATCATACACTGCGACGTGAAGCCGGAGAACATACTGCTGGACAAGGACCTGTGCGTGAAGCTCGCCGACTTCGGCATGGCGAAGCTGGTGGGGAGGGACTTCAGCCGCGCCCTGACGACGATGCGGGGCACCATCGGGTACCTGGCGCCGGAGTGGATCTCCGGGCTGCCCATCAGCGCCAAGGCGGACGTGTACAGTTTCGGGATGGTGCTCTTCGAGCTCATCTCGGGCCGACGCAACGCCGACAGCTCTGCCGACGGCGGCGGCGATGATGCCAGCGATTCCATGGAGGTGGAGGAAGGGCGGCGCGCGTCGTCGACGTTCTTCCCGGTGTGGGCCGTGGGGAAGGTGGCGGCCGGGGAAGCTGGCGCCGTGGCCGACCCGCGGCTGCGCGGCGACGTGAGGGGGGAGGAGCTGGAGCGGGCGTGCAGGGTGGCGTGCTGGTGCATTCAGGACGAGGAGGCGCACCGGCCGGCCATGGCGCAGGTCGTGCAGGCGCTGGAGGGCGTCGTGCACGTCGACATGCCGCCAATGCCGCGGATGCTGCAGAACCTGACGCTGGCATAA
>HvleckRLK46
ATGGGGAGACCCTCGCCGATCCGCCCACTCCTCCTCCTCGCCGTCCTTGGCGCCCTCGCCAGGCTCTGGCGTGCCGACGCCGGCACGGTCCGGACGGAGCTCGTCGCGCCGGACTTCGAGGCGTCGTACCTCCTCTTCATCGACACCCTCGGCGTGTTCCTCCGGTCCAGCAGCGGCGCCTTCGAGGCCGCGGTGCACAGCCCGGCGGGGCAGCAGGACCACTACTACCTCGCCGTGCTGCACGCGCCGTCCGGGACCTGCGTCTGGGCCGCCAACCGCGCCGCGCCCATCACCAACCGCGCGGCCCCGTTCCGCCTCTCGTCGGCCGGTGTCTCCGCCGAGGACGCCAACGGGACCGTCGTCTGGTCTACGCCGCCCTTCGCGTCCCCCGTCGCCGCGCTCCGCCTGGCCGACTCTGGCAACCTCGCGCTTCTCGACGGGCGGAATGGCACGCTCTGGCAGTCCTTCGACCGCCCCACGGACTCGCTCGTGTCGTCCCAGCGGCTCCCCGTCGGCGGGTTCCTGTCGTCCGCCGTGTCGGCCTCGGACCTGGCCGAGGGGGACTACCGCCTCAACGTCACCGCGGCCGACGCCGTGCTCGCGTGGATGGGGTCCTTGTACTGGCGGCTGTCGGGCGAAGCCATCGCCGTCAAGGATCGCGACGGCACGGTCGCGTACATGGCCGTGAACGGCACGGGGATATACCTTCTCGCGGCGGACGACACCGTCGTCGTCCAGGCCGCGATGCCGCCTGCCGGGCTGCGCATCGTTCAGCTGGGCGTCGACGGGAAGCTGCAAATCTCGAGCTTCGCGTCGGCGAACTCGTCGTCGTCGCCCATGGACGGCGGGATCGTGGCGCCGAGCAGGGGATGCGCCCTCCCGCTCTCATGTGGCGCGCTCGGCCTCTGCACGCCCAACGGCAACGTTTCCACCTGCACGTGCCCGCCGCCGTTCCCCACGGCGCATGACAACGGCTGCGCGCCGTCCGTTGGCTCCACATTGCTGCCCGAGGGGGGCTACTGCGGCGGCGGCGCTGGCGGCGGCTCGATGATCTCGTATCTCAGCCTTGGGAGTGGCATTGCGTACTATGCCAACAAGTTCTCGCCGCCGGCCACGGCCGGCTCCAACGCGTCGTCGTGCCAGGCACTCTGCACCAGCAACTGCTCCTGCCTCGGCTACTTCTACGACTCCTCCTCCTTGTCCTGCTACTTGGCGCAAAACCAGCTCGCTTCGTTCATAAACACCAACTCGAGCAACGGCGCCGGCATGTCCGGCTACATCAAGGTGCAAAGCTCGCAACGGTCGTCGTCGGACAGTTCGTCTTCCAACAAGACACTCATCGCCATCCTGCTCCCAACCATCATCGCATTTGTGCTCGTCGTCGTCGTCGGCGCTATCGTCATCGCGTCACGGCGCAATAAGGACGAACAGCGCGTGGGGAGGCGCGCTTCGCGGTCCAGGGACGTGCAGCTCCGGCGCCAGCGCTCGCCGGGGTCAGCCTCGGCGCACCTTGTGCGCGATCTGGACAACGAAGACGATGGCGATGACGACATTGTCATCCCCGGCCTCCCCACCCGGTTCACGCACGACGAGATCGAGGACATGACCAACAGCTACCGCACCAAGATCGGCGCCGGCGGGTTCGGGGCCGTGTACAAGGGTGAGCTCCCGGACGGCTCGCTTGTGGCCGTGAAGAAGATCGAAGGCGTCGGGATGCAGGGGAAGCGCGAGTTCATGACGGAGATCGCCGTCATCGGCAACATCCACCACGTCAACCTCGTCCGGCTCCGGGGGTTCTGCACCGAGGGCCACCGCCGCCTCCTGGTGTACGAGTACATGAACCGCGGCTCCCTCGACCGGCCCCTGTTCCGGCCGGCGGGGCCTCTTCTCGAGTGGAAGGAGCGGGTGGACATCGCCATCGGCGCGGCGAGAGGGCTCGCCTACCTCCACTTCGGGTGCAACCAGAGGATCATCCACTGCGACGTGAAGCCGGAGAACATCCTGCTCGCCGACGGCGGGCAGGTGAAGATCGCCGACTTCGGGCTCGCCAAGTTCCTGACGCCGGAGCAGTCCGGGCTGTTCACGACGATGCGGGGCACGCGCGGGTACCTGGCGCCGGAGTGGCTGACCAACACGGCCATCACCGATCGCACGGACGTGTACGGCTTCGGCATGGTGCTCCTGGAGCTGGTGCACGGCCGCAAGAACCGCAGCGAGCACGTGAGCGACGGCGGCGGCGGCGGCGAGGACTCCAACTCCTCGAATGGCACGGCGGGAAGCTCGTCGCGCAGCGGGAGGAACGACTACTTCCCGCTGGTGGCGCTGGAGGGGCACGAAGCCGGGCGGTACGCGGAGCTGGCGGACCCGCGGCTGGAGGGGCGGGTGGTGGGCAAGGAGGTGGAGAGGATGGTGAAGGTGGCGCTGTGCTGCCTGCACGAGGACCCGCACACGCGGCCGAGCATGGCGGTGGTGGCCGGCATGCTCGAGGGCACCATGGAGCTGGGCGAGCCGCGCGCGCAGGCGCTCGGGTTCCTCCGCCTGTACGGCCGGGGGTTCGCCGGGCCCTCCGACGGCAACGTCATGAAGCAGGCGATGGTGGATGATCGCGCCCGGTCGGAGACGACGATGACGACGATGAGCGGGTGGCCGTCGTACATGTCCTCGTCGCAGCTGTCCGGCGCGAGATAG
>HvleckRLK47
ATGGATCCCCTTCCCCTACACACAATCATCTGGCTTGTTTGTTGGTCATTTTGGTTATTCCCGTTCTGTGCATCATCCGGCAGCCGCCTTCTTCCCGACAAGCCGCTTTCTGCTGGAANNNNNNNNNNNNNNNNNNNNNNNACTTTTGCCCTGGGATTCTTCTCCCTGTCCAGCTCCAGCACAAAACATTACTACGTCGGCATATGGTACAAGAACATACCCGAAGACAACTGTGTGTGGGTTGCCAACCGTGCCATGCCCATAACTGATCCTTCTTCTGCAACACTCGCGTTCACAAGCGAATCCGATCTTGCGTTGTCAGACACCAACGGACAGCTTCTCTGGACGACAAACATCAGCGCTGCAGGAAATTCATCGTCAGAGGCAACTGGTGGAATAGCCACGCTTGAGAACAATGGGAATTTTATCCTTCAGTCATCACATGGCATCATCTTATGGCAAAGCTTCGATTACCCGACCGACACTCTCCTTCCACATATGAACCTCCTTCCAGGTATGAACCTCAGACTCACCCACAAGACACATGCACTACAACGGCTCATCTCTTGGAGAAGTCCCCAAGACCCGTCCCCAGGCAACTTCTTATATGGTGCAGACCCTGATGAGTTTCGACAACGTTTTATATGGAATGGCTCAACCCCATACATGCGAGGTTCTATATGGAATAAAAATTTGGTAGTCGGACAGTATGTCGAGAGTATCAAGTCCACAATTTACTATGAACTGCGTACTATTGATGATGAGATCTATGCTTCCTTTGGACTGCCGGTACCAGGTGTTTCATTACTGCAAATGAAGATTGACTACTCAGGCAAGATAAAAACACGAGTCTGGAATAGCAGCAGGTCCAAATGGACTGACCTGTGGTCAGGACCTAACCAGGAATGCAACAAATTTGGTTATTGTGGTCCATTTGGTTACTGCGACAACACACAGCCTATTGTGACATGCAAGTGTCTTGATGGCTTTGAGCCAAACAACAAACAAGACTGGACGGCCAGCAGGTTTTCGCAGGGATGCCACCGAATGGAAGCACTAAGATGTGGTCAAGGGGATGGCTTCTTAAATATGTTAACCATGAAGGTTCCCAGCCAGTTCTTGTATGTCAAGAATAGAAGCTTAGATGAATGCATAGCAGAATGCACCAGCAACTGCTCCTGCACGGCGTTTACTTACACCAATATGAGCATTGATGCTATAAATGGGGATGAAACTAGATGCCTATTATGGATCGGAGATTTGATCGACATGGAAAAGCTTATTGGACAAGGGGAAACTCTCTATATCCGGGTTAATGGACTGAGTGATAAAAAGGGGAAGAGCATTGTTTTAAAAATTACACTGCCAGTTGTGTCAAGTTTGCTCATGATCATATGTGTGTGGCTTGTTTGGATCTGCAACTTGGGAGGCAAACAAAGAAACAAGAAAATTTGGAAGAAGCTGATGTCAGGAACTTTGAGCACCTCTGTTGAACTTCGCGATGGAAACATGAAGTATCCTTTTATTAGCTTCAAAGAAATAATACTTGCAACGAACAATTTCTCTAGCTCCAACATGCTTGGACATGGAGGTTTTGGCAATGTTTACAAGGGAACATTAGAAGATAGTACAGAAATTGCCGTGAAAAGGCTAAGTAAGGGTTCTGGTCAGGGGGTAATGGAGTTCAGAAATGAAGTAATACTCATTGCAAAGTTGCAGCACCAAAACTTGGTTAGACTTCTAGGTTTCTGTATCCATGGAGATGAGAAACTTTTGATATATGAATACTTATCAAACAAAAGTCTACACGCCATGCTTTTCGATGCCACAAGAAAATCAATGCTAGATTGGCCGATAAGATTCGAGATAATCAAAGGGGTAGCTAGAGGACTTCTTTATCTTCATCAAGATTCAAGGCTGAAGATAATTCACAGGGATCTCAAAGCAAGCAACATATTGTTAGATGCCGAAATGTGTCCTAAGATATCTGATTTTGGTATGGCAAGGATATTTGGTGGCAATCAGCAGCAAGAAAATACTAACCGTGTTGTTGGCACATACGGTTACATGTCACCTGAATATGTTTTGAAAGGAGTGTTTTCTGTGAAGTCTGATGTATATAGCTTTGGAGTTTTACTACTGGAGATTGTGAGTGGCTCAAAGATCAGCTCTGTGCTCCTAAAAGCAGACTTCAGCAGCATTATAGCCTATGCATGGAGCTTATGGAAGGATGGGAACACAAAGGATTTTGTTGACTCACCAATTGTGGGGGGCTGCTCACTGGATGAAACTTTACGGTGCATCCATATCGGACTCTTATGTGTTCAAGGCAGCCCAAATGCGCGGCCACTCATGTCATCAATTGTGTCCTTTCTGGAGAATGGAGATATATCACTTCCAACTCCAAAAGAGCCTATGTATTTTGTAGAAAATAACTATTGTGCCGATGGAGCA
>HvleckRLK48
ATGGATCCCCTTCCCATACACATAATCATCTGCCTTGTTTGTTGGTCATTTTGCTTATTGCCATTTTATGCATCATCCAGCAGCCGCCTTCTTCCCGACAAGCCGCTTTCCGCTGGTAGCACCATCACCTCCGACGACGGCACTTTTTCCCTGGGATTCTTCTCTCTGTCCAGCTCCAGCACAAAATATTACTACATCGGCATATGGTACAGGAACATACCCGAAGATAACATTGTGTGGGTTGCCAACCGTGCTATGCCCATAACTGATCCTTCTTCTGCAACACTTGCCTTCACAAGCGGATTCGATCTCGCCTTGTCAGACACCAGTGGCCAGCTTCTCTGGACGACAAACATCAGCGCTGCAAGGAATTCATCGTCAGAGGCAACTGGTGGAGAAGCCACTCTTGATAGCAATGGGAATTTTATTCTTCGGTCATCACATGGAACTATCTTATGGCAAAGCTTCGATTACCCGACCGACACTCTCCTTCCAGGTATGAACCTCAGGATCACCCACAATACGCATGCACTACAACGGCTCATCTCTTGGACAAACCCCCAAGACCCATCCCCGGGCAACTTCTCATATGGTGCAGACCCTGATGAGTTTCGGCAGCGTATTACATGGAATGGCTCAACACTATACCGGCGAAGTCTGGTATGGAATAATAATTTGGTAGTTGGGAAGTATGTTGAGAGTATCAAGTCCACAATTTACTATACACAGCAAATTATTGGTGATGAGGTCTACGCTTCCTTTGGACTACCAATACCTAGTGTCTCAGTAGTGCTAATGAAGATTGACTACTCAGGCAAGATGAAGACACAAATCTGGAATAGCAACAACTCCAAATGGACTGACCTGTATTCAGGACCTAACCAGGAATGCAACAAATTTGGTTACTGTGGTCCATTTGGTTACTGTGACAACACGCAGCCTATTGTGACATGCAAGTGTTTTGATGGCTTTGAGCCAAACAACAAACAAGACTGGATGGCCCGCAGGTTTTCACAGGGATGCCACCGTATGGAAGCACTAAGATGTGGTCAAGGGGATGGCTTCTTAAATATGTCAACTATGAAGATTCCCGACCAGTTCTTGTATGTCAAGAATAGAAGCTTAGATGAATGCGTAGCAGAATGCACCAGCAACTGCTCGTGCACGGCGTATGCTTACACCACTATGAGAACTAATGCTATCGATGAGGATGATACTAGGTGCCTGTTATGGATCGGAGATTTGATTGACACGGAGAAATTCATTGGACAAGGGGAAAACCTCTATATCCGATTTAATGGATTGAGTGATAAAAAGCAGAAGGGCAATGTTTTAAAAATTACACTGCCAGTCGTTTCAAGTTTGCTCATAATCATATGTGTGTGCCTCGTTCGGATCTGCAGCTTTGGAGGCAAACAAAGAAACAAGAAAATTTGGAACAAGCTGATGTCAGGAACTTCAAGCACTTCTATTGAACTTCATGATGGAAACTTAAAGTATCCTTTTATTAACTTCAAAGAAATTGTACTTGCAACAAACAATTTCTCTAACTCCAACATGCTTGGACATGGAGGTTTTGGCAATGTTTACAAGGCGACATTAGAAGATGGTACAGAACTTGCTGTGAAAAGGCTTAGTAAGGGTTCTGGACAGGGCGCACTGGAGTTCAGAAATGAAGTAGTACTCATTGCGAAGTTGCAGCACAAAAACTTGGTTAGACTTCTCGGTTTCTGCATCCACGGAGATGAGAAACTATTGATATATGAATACTTACCTAACAAAAGTCTGGACGCAATGCTCTTTGGAGATGCCATAAGAAAATCAATGCTTGATTGGCCAATAAGATTCGAGATAACCAAAGGGGTAGCCAGAGGACTTCTTTATCTTCATCAAGATTCAAGACTGAAGATAATTCACAGGGATCTCAAAGCAAGCAACATATTATTAGATGCCGAAATGAGCCCTAAGATATCTGATTTTGGTATGGCAAGGATATTTGGCGGAAATCAGCAGCAAGAAAATACCAACCGCGTTGTTGGCACATACGGTTACATGCCGCCGGAATATGTTTTGAAAGGAGTGTTTTCTGTCAAGTCTGATGTATATAGCTTTGGAGTTTTACTACTGGAGATTGTGAGTGGCTCAAAGATCAGTTCTGTGCACCTAAAAGCAGACTTCCCCAGCATTATAGCCTATGCATGGAGCTTATGGAAGGACGGGAACACAAAGGATTTTGTTGACTCATCAATTGTTGACAGCTGTTCACTTAATGAAATTATACGGTGCGTGCATATCGGTCTCCTGTGTGTTCAAGGAAGCCCAAATGCACGGCCACTCGCGTCGTCAATCATGTCCTTTCTGGAGAATGGAGACATATCACTTCCATCTCCAAAAGAGCCGGTGTATTTTGCGGAAGATAACTATGGTACTGATGGAGCA
>HvleckRLK49
ATGGATCCCCTTCCCATACACACAATCATCTGCCTTGTTTGTTGGTCATTTTGGTTATTCCCATTCTGTGCATCATCCGGCAGCCGTCTTCTTCCCGACAAGCCGCTTTCTGCTGGAAGCACCATCACCTCCAACGGCGGAACTTTTGCCCTGGGATTCTTCTCCCTGCCCAACTCCGGCACAAAACAATACTATGTCGGCATATGGTACAAGAATATACCCGAAGACAACATTGTGTGGGTGGCCAACCGTGCTATGCCGATAGCTGATCCTTCTTCTGCAACACTGGCCTTCACAAACGGATCCGATATCGCCTTGTCAGGCACCAACGGCCAGCTTCTGTGGACAACAAACATCAGCGCCACAAGAAATTCATCGTCAGAGGCGACTGGTGGAGAAGCCACGCTTGAAAACAATGGGAATTTTATCCTTCGGTCATCACAGGGCAACATCTTATGGCAAAGCTTCGATTACCCGACCGACACTCTTCTTCCAGGCATGAACCTCAGAGTCACCCACAAGACGCATGCACTACAACGGCTCATCTCTTGGAGAAACTCCCAAGACCCATTCCCGGGCAACTTCTCATATGGTGCAGACCCTAATGAGTTTCTGGTTCGTTATGTATGGAAAGGCTCAAAACCATACTGGCGAAGTGCAGTATGGAATAACTATTTGGTAGTCGGGCAGTATATCAAGAGTATCAAGTCCACATTTTACTTAACAATGCAAACCATAGATGATGAGGTCTACATTTCCTTTGGATTACCAGTACCAAGTGTATCCTCAGTTGTGCTAGTGAAGATGGACAGTTCAGGCAAGATAAAGACACGAGTTTGGAATAGCAACATGTCCAAATGGACTGACCTGGGGTCAGAACCTAACCAGGACTGCAACAAATTTGGATACTGTGGTCCATTTGGTTACTGCGACAACACACAGCCTATTGTGGCATGCAAGTGTCTTGATGGCTTTGAGCCAAACAACAAACAAGACTGGACGGCCCACAGGTTTTCACAGGGATGCCACCGGACGGAATCACTAAGATGTGGTCAAGAGGATGGCTTCTTAAATATGCCAACCATGAAGGTTCCCAACCAGTTCTTGCATGTCAAGAATAGAAGCTTAGATGAATGCATAGCAGAATGCACCAGCAACTGCTCCTGCACGGCGTATGCTTACACCAATATGAGCACCAATGCTATCAATGGGGATGGAATTAGGTGCCTATTATGGATTGGAGATTTGATTGACACCGAGAAGCTCCATGCACAAGGAGAAAACCTCTACATTCGGATTAATGGATTGAAGGATAAAAAGCGGAAGAGCACTGTTTTAAAAATCACACTGCCAATTGCGTCAAGTTTGCTCATAACCATATGTGTGTGCCTTGTTTGGATATGCAACTTGGGAGGCAAACAAAGAAACAAGAAAATTTGGAAGAACCTGATGTCAGGAACTTCAAGCACTTCTGTTGAACTTCATGATGGAAACTTAAAATATCCTTTTATTAGCTTCAAAGAAATTGTACTTGCAACAAACAACTTCTCTAACTCCAACATGCTTGGACATGGAGGTTTTGGCAATGTTTACAAGGGGACATTAGAAGATGGTACAGAAATTGCTGTGAAAAGGCTTAGTAAGGGTTCTGGCCAAGGGGTACTGGAGTTCACAAATGAAGTAATACTCATTGCGAAGTTGCAGCACAAAAACTTGGTTAGACTTCTCGGTTTCTGCATCCATGGAGATGAGAAACTATTGATATACGAATACTTACCTAAGAAAAGTCTGGACGCCATGCTTTTTGATGCCACACTAAAACAGTTGCTTGATTGGCCAATAAGATTCGAGATAATCAAAGGGGTAGCTAGAGGACTTCTTTATCTCCATCAAGATTCAAGGTTGAAGATAATCCACAGGGATCTCAAAGCAAGCAACATATTATTAGATGCTGAAATGAGCCCTAAGATATCTGATTTTGGTATGGCAAGGATATTTGGCGGAAATCAGCAGCAAGAAAATACCAACCGCGTTGTTGGCACATACGGTTACATGTCACCTGAATATGCTTTGAAAGGAGTGTTTTCTGTCAAGTCTGATGTATACAGCTTTGGGGTTTTACTTCTAGAGATTGTGAGTGGCTCAAAGATCAGCTCTGTGCACCTAAAAGCAGACTTCTCCAGCATTATAGCCTATGCATGGAGCTTATGGAAGGATGGGGACACGAAGGATTTTGTTGACTCGTCAATTGTGGGGAGCTGTTCATTTAATGAAACTATACGGTGCATCCATATCGGACTCTTGTGTGTTCAAGACAGCCCAAATGCGCGGCCACTCGTGTCATCAATCATGTCCTTTCTGGAGAATGGAGACATTTTACTTCCACCTCCAAAAGAGCCTATGTATTTTGCAGAAAATAACTATGGTGCTGATGGAGAAGCAGAAAATACTGTGAATTCTGCAAATACCATGAGCATTACAGCACTAAAGGGACGCTAG
>HvleckRLK50
ATGGATTGGTCATCTCTCACCTGTTCAGCAATCGTCCTGATCATTCTGTTCCTGCCGTTCGGTGCCTCTGACGACCGGCTTGTCCCTGGCAAGCCACTCACCCCCGGCACAACCATTGTCTCGGATGGCGGTGACTTCGCCTTGGGCCTCTTCTCATCTGGCTCGATGCAGTCCAACCTGTACCTCGGCATCTGGTACAACGGCATCCCCGAGCTCACCATGGTGTGGGTCGCCAACCGGGAAACCCCACTCACGAACAGCACTTCCTCCGCGCCGACGCTCTCCCTCACCAGCACATCCAATCTTGTTCTCTCTGATGGTGATGGCAGTCGTGTTGTTTGGACAACTGACGTGGCTTCCTCGAGCTCGTCTTCACCAGAGGCGGTGCTTCTGAATACTGGTAACCTCGTCATCCAGTCACCTAATGGCAGCAGGGTTTGGCAGAGTTTTGACCACCCGACCGACACGTTCCTACCTGGCATGAAGATGCGGATCAGGTACAGGACACGCGCCGGTGAGCGCCTGGTGTCCTGGAAAGAAGCCGGAGACCCTTCTCCTGGGAGCTTCTCCTACGGCTGCGATCCGGCCACGTCCATCCAGATGTTCCTCTGGGATGGGTCGCGCCCGGTGTACCGCAGCACCCCGTGGACCGGGTTCCAGGTGAAGAGCGAGGGCGAGCACCTGATAACCAACACCAGCGCCATCGTCATATCCCTGGCCTTCGTCAACACTGACGAGGAGAGCTACACGATGTTTAGTGTCTCTGAGGGTGCGTGGCACACCAGGTTCGTGCTGACCTACTCCGGCAAGCTCCAGTTCCAAAGCTGGAATAGTAGCTCTTCCGCATGGGTAGTCTTTGGGCAGTGGCCACGCCACAAATGCAACCACTACGGCTACTGCGGCCTGAATGGCTACTGTGACGAGACAGTGTCACCTATTCCGACATGCAAGTGCCTTGACGGTTTCAAGCCGACGAGCACTGAGGAGTGGGATAACAACAAGTTCTGGAAAGGGTGCCAACGGAGAGAGGCGCTGCAGTGTGGCGATGGTTTTGTGCCCTTGTCGGGGATGAAGCCACCGGATAAGTTCATGCTCGTCGGTAACACATCGTTGAAGGAGTGTGCTGCGGCATGCAGCCGCAACTGCTCCTGCATGGCCTACGCTTACGCCAACCTGAGCAGCAGCATTGCCAGCGGAGACATGACAAGGTGCTTGGTGTGGGTGGGGGAGTTGGTTGACATCGGGAGGCTAGGCTCAAGCACCGCCAGCGACACGCTCTATCTGCGGCTTGCAGGCTTAGGTGCAGCATCTGGTAAAAGGACAAGGAGCAATGCCGTGAAAGTTGTGTTACCGGTTTTAGGAAGTATTGTTCTGATACTCGTGTGCATTTCCATTGCATGGTTGAAATTCGAAGGCAAGGACAACCAGGAAAAACACAAGAAGTTGCCATCTGATGGTTCAAGTGGTCTTGAATTTCCATTTGTAAGATTTGAGGAAATTGCCCTTGCAACACACGAGTTCTCCGAAACATGTATGATTGGACTTGGAGGCTTTGGCAAAGTTTACAAGGGAACACTAGGTGGTCAAGAAGTTGCTATCAAAAGGCTAAGTATGGATTCTCAACAAGGAGTAAATGAATTCAAAAATGAAGTAATTCTTATTTCCAAATTGCAACACAAAAATTTGGTTCGACTTCTTGGATGTTGTGAGAAGGGAGATGAAAAGTTATTGATCTATGAGTATTTGCCTAATAAAAGCTTAGATGCCACCCTTTTTGATGATTCAAGAAAACATTTGCTTGATTGGGGTACACGGTTAACCATAATTAAAGGTGTCGCAAAGGGGCTTCTCTATCTTCATGAAGATTCAAGACTGACCATAATTCACAGAGATCTCAAAGCCGGGAACGTTTTGCTAGATGCAGAGATGAAACCTAAAATAGCAGATTTTGGTATGGCGAGGATCTTCGGTGATAACCAGGAAAATGCAAACACCCAACGCGTTGTCGGAACATTTGGTTACATGGCCCCTGAGTATGCAATGCAAGGTATCATCTCTACCAAATCCGACATCTATAGTTTTGGCGTGTTACTACTGGAGATCGTAACTGGTATGAAGAGAAGCTCCACTAGTCATGCAAGGGGCTTTCCGAGCCTCATAATCTATTCGTGGAATATGTGGAAAGATGGGAAGGCAGAGGAATTGGCTGACTCATCTATTATAGATACATGCCTACTAGATGAGGTGTTGCTTTGCATTCATGTAGCACTCTTGTGTGTCCAAGAAAACCCAAAAGACAGACCACACATGTCATCGGTTGTGTTCACCCTAGAGAATGGAAGCACTACACTCCCAATTCCCAGTCGGCCTGCATACTTTCTGGGACAGAGCACTGAATTGGAGCAACTCAGAAACAATATTCAGAATTCCGTGAATACTTTAACTCTTACTGGTATAGAGGGTCGATGA
>HvleckRLK51
ATGTTTGTAGAGGCTTTGAAGAAACCAACGGCAAGTAGCTTGATCAGAAACCGCTCCCACCTCAGTCAGAGGACGTCAATGACTGGATGGTTTCTGAAGATTGCCGCCAACTGGAAGGGCTCACCTTCCATACACATGAATGCACGGCGCGAATGTCACGGCTCTCCATTATGCTTCATTATGCTGTGGATGCTTGTGTTACCCAACCTCTGGATAATATGCAGCGGCAGCATTCAGAAATACGTTCTCCTGCCAGGGTTCAGTGGCTCGGAAATGGATTACATTGATAACAATGGAATATTTCTGCTCTCTAATGGATCGGTGTTTGGCTTTGGTTTTGCCAGCACCAGTGCGTCAGAGAGCACATCCTACCTTCTTCAAGTGGTCCACCTGGGCACCAATACTGTCATCTGGACTGCGAATGCTAACTCTCCTGTTTTGCATTCGGATAGCTTTGAGTTTGACAAGGATGGCAAGGCCTATCTGCAGTCTGCAGGCTCCAGTGTCTGGACTGCCAATATCTCTGGCAAAGCCACCTCTATTCAGCTGCTGGACTCTGGCAATCTTGTAGTGCTCGGAGAAGATAGCTCTTCTCCTCTGTGGCAGAGCTTCAGCTATCCAACAAACACACTTCTGTCTGGCCAAAGCTTCAATGATGGTATGACCCTTGTGAGCCATTCCACCCGACAGAACATGACACATACACTTCAAATCAAATCTGGGGACATGATGTTGTATGCAGGCTTCCAGAAGCCCCAACCATACTGGTCCGCACTTCAGGATAATAGGCTGATCGTTAACAAGGATGGCGCCATTTACTCTGCGAGTCTCAATGCAACTTCTTGGTACTTCTATGATAAATCAGGGTCTCTTTTATCACAGCTCCTCATAGCGCAGCAGGGTGATACCAACACCACGCTTGCCGCTGTCCTCGGTGAAGACGGGTCGATTGCCTTCTATATGCTGCAGAGTGCGAATGGCAAGACTAATCTGCCAACCCCAATCCCACAGGACTCGTGTGACACGCCAACCCACTGCAATCGATACTCTATTTGCAACAGTGGGACAGGATGTCAATGCCCTTCAGCCCTCGGCTCCCCTCCAAACTGTGACCCTGGTCTCATATCACCTTGTAAGTCAAAAGAGGCGTTTCAGCTGGCTCAACTGGACAGTGGAGTTGGATATATCGGTACGAGCTTCTCCTCACCTGTGCCTAAGACAAACATCACAGGTTGCAAGAATACTTGCATGGGAAATTGCTTATGTATCGCCGTGTTCTTTGACCAAAAAACAGGCGATTGCTTCCTTTTTGACCAGATTGGTAGCTTGCAGCATAAAGATGCAGGTAAAACTAATTTTTCATCTTTCATCAAGGTACCTAGCAGTGGTTCAGGGCAAGCTGGGAGTGGCAGCGGCAATGGAAACCACAACATCATTATTGTTGTCATTATAGTTGGAACTTTGGCTGTCATCGGTGGCCTCATTTATGTCGGTTTCTTCATTTATAAGAGGAAGAGGTATCCTCCGTCCTCACAAGAAGGGGCTGGTTCATCGGAAGACGATGGATATCTGCAGACGATATCTGGAGCACCAGTGCGGTTCACTTACAGGGAGCTCCAGGATGCAACAAACAACTTCATTAATAAGCTTGGCCAAGGAGGATTTGGATCTGTATATCTGGGAGCACTCCCAGATGGCAGTCGCATTGCTGTAAAAAAGCTGGAGGGAATAGGCCAAGGGAGGAAAGAGTTTCGCTCCGAGGTGACGATAATTGGCAGCATCCACCACATTCATCTAGTTAAACTCCGAGGCTTCTGTGCTGAGGATTCACACAGGCTTCTTGCATATGAATACATGGCGAAAGGGTCACTGGAAAGGTGGATTTTCTGTACTAAGGAGGATGATCCCCTTCTGGACTGGGATACAAGGTTTAACATTGCACTTGGAGCAGCAAAGGGACTGGCATACCTCCATCAGGACTGTGAATCGAAGATCATTCATTGTGACATCAAGCCTGAGAATTTTCTGCTTGACGACAACTTCGTTGTGAAAGTATCTGACTTCGGCCTTGCCAAGTTGATGAGCAGGGAGCAGAGCCATGTTTTCACGACGATGAGAGGCACACGGGGCTATCTCGCGCCCGAGTGGATCACCAACTACGCCATCTCAGAGAAGAGCGACGTATACAGCTACGGCATGGTTCTGCTCGAGATAATCAGCGGGAGGAAAAACTTTGATCCCGTGGAAGGCTCGGAAAAGGCCCATTTCCCGTCCTTCGCTTTCAAGAAGCTGGAGGAGGGCGATATTCGTGAGATCTTTGACGCCAAGCTGAAGTACAACGACAAGGACGAGCGGTTGGAGATTGCGATCAAGGTTGCTCTGTGGTGCATCCAGGAGGATTTCTACCAGAGACCTTCCATGTCGAAGGTGGTCCAGATGCTCGAATGCGTCTGCGACGTGCCCCAGCCACCGGTATCCTCGCAGATCGGATACAGGCTCTACGCGAACGCCTTCAAATCGAGCAGTGAGGAGGGCATGTCGTCGGGGATGTCGGATTACAACAGTGAGGCTCTACTTTCAGCGGTGCGGCTCTCTGGTCCTAGATGA
>HvleckRLK52
ATGTATCCTCCAAAGATCTTGACTCTCCTATTTTTCCTCCCTTTAACTTATTCTTCTTCCAGACTTACCATGAACAAATCCTTTGCTTTGAATGCTGAGCTTGGCACCATATGGCGGAATAATCCCTCCCTCCTCCACAACATTTCTCCAGACGACAACTTCTCCTTGCGCATCATCCTTCCTAAGGAGGCCTTCATGACTTCTGTTAACAGCTATTATAATAGCATACCTTCATTTGCCTGCGGCTTCTTCTGTGCAGGGGCTGTGTCTACCTGTGATGACTACATCTTTTCCGTCTTGTTTGTCAGTGTTTACAGTTTTCATGCTGAAGTGTACTTTCATTCGCCGGAGGTGGTCTGGTCTGCCAACCGTGATCACCCAGTCAAAGAGAATGCTAGTGTCCAACTTACTGAACTTGGCGACTTGGTGCTCTATGACGCTGACGGAACACAGGTTTGGTCTACCAATACCACAGAAATGTCAGTTGTTGCCATGAATCTTACTAGAACAGGCAATCTGGTGCTGTTAAATCATGTGAATACGGAGATCTGGAGGTCTTTTGATCACCCAACTGACACACTTGTCACTGGGCAGGTTCTACAAGTGGGGCAGAAGCTCATGGCAAGCACCTCGATGGAAAATCGGGCCAGTGGAATTTTTTATCTTACTGTCCTCCCTGATGGCATGTATGCATTTGCAGGAACTGATACTCCTCTTGCATACTATCAGAGCCCCACTGGTGGAACTGTCATGACAAACAAGTCAGCATATGTTGCACTCAAGGATGGCAGTCTCGAGGTGTTCACTTGTTTCCGGGATACAGAGGCACCGGATTACCAGATCCAGCTGCCCAGGGATAACGATGGGCCGGTGTTTGTGAGGCTAGAGTTCGATGGGCACCTGAGGTTATATCAGATGCCAAACAACAGTTGGGCGAGTTCAGATGTTTTTGATATAACCGATCCTTGTGATTATCCTCTAGCTTGTGGTGGATATGGTATTTGTTCGAATGGACAGTGCAGCTGCCCTGATGCTGCCATTGGGCAATCCGGATTATTTGAACTAATTGATCAAAGGGAGCTTAATCGTGGCTGCTCGCCAATAGTTTCACTATCCTGTGATTCAGCACAGAAGCCTAGGCTTCTTTCGCTTCCCAACATCACTCGCTTCAGCGGTGTCTACAATTGGACAACAAGCGAAGAGCAGTGCAAATTATCATGCTTGAATGCTTGTTCGTGTAAGGCTTCATTCTTCCAGCAGTATGACACCTCTACTGGTTTCTGTTTTGTTGCATCTGACATGTTCTCCATGATAAGTGTAAATGCCCAAAGCTATTCAAGTAACTTTAGTTCTCTTGCATTTGTTAAGGTTGGGGCTAGACACAAATCGGTGCTATCTAAAGGAAAAACAGCCATTGTCACAGTTGTTGCTTCTTCGCTTATTGCTTCAGTTATTGGTGCAGTGCTCGTAGTTTTGAGAAGAAAAAGAGGGGGACCTTTAGAATATGAAGACATCATCAATCAGTTGCCAGGGCTACCAACAAGATTCTCTTTTCTGAAGTTGAAATCAGCAACTGGAGATTTCTCGACCAAGATCGGGTCAGGAGGATCTGGTTCTGTTTTTGAAGGGCAGATTGGGGATATGCATGTTGCTGTGAAGAGATTGGATGGCATGAGTCAGGGGGAAATGGAATTTTTAGCCGAGGTTCAGACCATCGGAACCATCAACCATGTACATTTGGTGAGGCTAATTGGATTTTGTGCTGAAAAATCACACAGACTTCTCGTCTATGAATACATGCCAAATGGATCTTTGGATAGGTGGATTTTTGAAAAGCACCAAGAAGCCCCACTTGATTGGAAGACCAGATTGAGGATCATAGCTGATGTAGCAAAGGGCTTAGCTTATCTTCATAGTGACTGCCGGCAAACAATAGCTCATCTGGACATCAAACCACAAAATATCCTTTTGGATGAGCAGTTCACTGCTAAGGTATCTGACTTTGGACTTGCCAAGCTAATAGATCGCGAGCAGAGCAGTGTCATGACTCGGTTGAGAGGCACGCCAGGTTACTTAGCTCCAGAGTGGCTGACGTCTGTTATCAACGAAAAGGTTGATGTTTATAGCTTTGGCATTGTCATCACGGAAATTATTTGCGGCCGAAGGAATTTGGATTACTCACAGCCTGAAGAACGTCTTCATCTCGTCAGCGTGCTGCAGGACAAGGCCAAAAATGACCAGCTGCTGGACCTAATCGACCCGCGATCCACTGATATGCAATATCATCTGGATGAAGTGTCACGCATGATGAACCTGGCAATGTGGTGCCTGCAGGTTGACAGCCGTCGGCGGCCTTCCATGACCGAGGCCGTCAAAATCCTGGATGGCACAATGGATGTTGAAACCGAGCTTGATCTGGACCTGGTAAATCTA
>HvleckRLK53
ATGGCTACTCTCCACATGTTCCTCAGCCTCCTCCTCCTCATCCCCGTGCACACCATTCCTCCTACCACAGCCACAAAAGACGATACTCTCTCGCCAGGCCAGGCATTGGCCGTCGGCGACAAGCTCGTTTCCAGCAACGGCAAGTTCGCGCTTGGCTTCTTCCAGCCCGGCACCGGCAACATCAGTAGTAAGTCATCTTCTACCTCTCCCGGTTGGTACCTTGCCATATGGTTCAACAAGATCAATGTCATCACCCCCGTCTGGGTCGCCAACCGAGAGAGGCCGATCGCTGGACCCGATCTAAGAGCAACACAGCTCCAAATCTCAGAAGATGGCAACCTTGTCGTCTTAAACAACGCCTCCCAATCCGTTGTCTGGTCCACTCACATCACCAGCAGTAACAGAACCAACACCACCTCCACCAGCAGCAGCAGGAGAGCCATCCTCTTGGGCAGTGGAAACCTCGTCATAGAAAGCCCGTCCAGTGAAGTGCTGTGGCAGAGCTTCGACGACCCAACCGACGTCGCGCTCCCCGGCGCCAAGATCGGCTGGAACAAGGTCACCGGCCTGAACCGCGTCGGCATCTCGTGGAAGAGCCGGATCGACCCGGGCCTCGGCTCCTTCAGCGTGGGGCTGGAGACCAATGGCACCAGGATGGTGATGGTGGGGCACCGAGGCTACCCTTCCCAAGTGTACTGGTCGTGGTCGCCCGACGAGTCGCCGATGCAGATGCCAGCGCTCCGGGCGCTGCTGCAGATGAATCCACAGACCAGAGGGTTGGTTGTCCCGGAGTACGTCGACAACAGCGAGGAGGAGTACTACATGTACACCTCGCCAGACGAGGCCTCTTCCACGTTCCTCTCCCTCGACACGTCTGGTCAGACCAAGCTGAACGTGTGGTCGCAGGCCAACCAGGCTTGGCAGACCATCTACGTCCAGCCCATTGATCTCTGCCGCCCATACGCCACATGTGGACCGTTCACCGTCTGCACCGGCAGCTCGCAGCCGCCCTGCGAGTGCATGGAGAGCTTCTTCAGGACGTCGCCTCAGGATTGGGAGCTCGGTGATCGGACAGGAGGGTGCTCCAGACGCACTCCGCTGGACTGCAATGGCAACAGGAGTTCGACGGACGTGTTCCACCCCGTAGCTCGTGTCACATTGCCCTACGGCCCCCGGAGCTCACAGGGTGCTCCGGCAACTCGGGGCGAATGCGAATCGGTCTGTCTCAGCAACTGCTCCTGCACCGCTTACTCGTACCAAGGCAGCAAATGCTCTGTTTGGCTTGGGGAGTTGTTCAGTGTAAACAAGGATGATGGCATCGAGATCCGCTCTGAATATACTCTGTATATTCGCCTTGCCGCTGGAGATTTCCCGAGCTCCACAAGAGATAAAAGAAAACCAGCACTAGCTGGAGTTGTTATTGCTGCAACCGCAAGCGTTATCGGTTTTGGGTTGCTGATGCTCATGCTGCTACTTGTGATCTTAAGGAACAGATTCAACTGGTGTGGAATGTCATCACAGGCCAGTAATAAAGATAGTGTTGGAGTTGTTGCCTTTAGATATGCCGATTTGGGCCGTGCTACAAAGAATTTTTCAGTGAAGCTAGGAGCAGGAGGTTTTGGGACTGTATTTAAGGGAGTTTTAAGTGACCTGACTAGTGTAGCAGTGAAAAGGCTTGAAGCCGCGAGCCAGGGAGAGAAGCAATTCAGGGCAGAGGTAAGTGCACTTGGACTGATCCAGCACATCAACCTGGTCAAATTGGTTGGTTTCTGCTGTCATGGTGATAAGAGGCTACTTGTATATGAACACATGTGTAATGGTTCTCTTGATTCCCATCTGTTCCAGAGCAATGGTACCGTCCTTGACTGGAGCACCAGATATCAGATAGCCATCGGAGTTGCTAGAGGATTGTCCTACTTGCATCAGAGTTGCCACGAATGCATCATACACTGTGATATCAAGCCAGAAAATGTACTTCTCAACGAATCGTTTGTCCCTAAAATTGCAGACTTTGGGTTGGCATCGGTCATTGGAAGGGATTTTAGTCGGGTTCTAACTACATTCAGAGGAACTATGGGGTATCTAGCCCCAGAGTGGCTTACTGGGGTTGCTATTACATCAAAAGTCGATGTTTACAGTTTTGGCATGGTACTGATGGAAATCATATCAGGAAGAAGGAATGCATCTGTGGTACACACTAGCGGCAGCGACCATGTCGCTTATTTCCCTGTGCAAGCCATAAACAAGCTTCATGAGGGGGATGTTCAGAGCTTGGTGGATCCACAATTATATGGTGACTTCAGCTTCGATGAGGTTAAAAGAGTTTGCAATGTAGCATGTTGGTGCATCCAGGATAATGAGTTGGACCGGCCAACTATGGGTGAAGTAGTCCGAGTTCTTGAGGGTGTAAAGGAGCTCGATATGCCCCCGATGCCAAGACTGCTTGCGGCTATAACTACAGAATGCTCTTATGTCGATTCCATGTAA
>HvleckRLK54
CTGAGTACCCAGTCTACATTTGCAGCCCTTGCACGACAAGTTTCTGCACGCCCTCACCGTCAGTTCACCATGCCACTCCACCTCATTTTTTTCACCCTGCTCTTGTACCTACACATCCCAGCAAGTTCTGCAGCGACGGACACCATCTTAGCCGGCCAGACACTTGGCGTCAACGACAAGCTCATCTCCAGCAATGGCAGGTACGCGCTTGGCTTCTTCGAAACAAGCAGAAAATCCTCCGGAAGCACTCCCAACTGGTACCTTGGCATATGGTTCAATACAGTTCCCAAATTTACTTCAGCGTGGGTTGCAAATAGGGATAAGCCAATCAAGAATAGCACCTCACTGGAGCTCGCAATTTCCCACGATGGCAACCTTGCCATCTTAAACCGGTCCAGCAAGTCCATAATGTGGTCTACACAAGCATCCATCACAAGAAATAGCACCACAGCAGTGCTGTTGAGTAGTGGAAATTTCATCCTGGCAAACTCTTTGAACTTATCAGAAGTTTTCTGGCAGAGCTTTGATCATCCCACAGATACATTTTTTCCTGGGGCAAAGCTTGGATGGGATAAGGTTACCGGCATAAATCGCCGCCTTGTTTCTTCAAAAAACTCGATCAGCCCGGCTAGTGGCATCTACTGTACTGAGATAGACCCCAGTGGCATTAACCAGTTCTGGCTTGCACCATTGAACTCCTTGGTACCATATTGGTCTAGCGGTGTATGGAACGGCAAATACTTTGCCTCAATTCCAGAGATGGCAGCCCATTCTATCTTCAGTTCGATATTTGTCAGCAATGACCAAGAGAAGTATTACACATATAACTTAGAAGATGAAACAATGGTTACTCGCCAAGTACATGATGTTTCAGGTCGATCAAAGTTGTTCATCTGGTTAAAGGGTTCACAGGACTGGGTAATGATATATGCCCAACCAAAAGCTCAATGTGATGTCTATGCAATTTGTGGACCATTCACGATTTGCAATGATAATGCACTCCAGTATTGTGATTGCATGGAGGGCTTCACCATAACATCCCCTGAGGATTGGGAACTAGAAGATCGAACCGGTGGGTGCTCAAGAAATACTCCTTTAGACTGCAATATTAGCAACAAAAGTACGACACATACCACGGACAAGTTTTACCCTGTGCCATGTGTTAAGCCGCCGCATAATGCCCGAAAAGTAGAAGAAGCTGCAAGCACGAGTAAGTGTGCACAAGCTTGCCTCAATAATTGCTCTTGCACCGCGTATTCCTTTAGCAACAGCGGATGTTCTATCTGGAATAATGAATTGCTCAACATGAGACAGTTACAATGTGGTGGCGCTACCAATTCAAATGAAGAAACTATTTACCTTCGCCTATCTGCTAAAGATATCAAAAGTTTAAAAAACAACAGAGGAGGGTTTGTTATTAGAATTGCAATTGGTACAGGCTTTTCTGCACTAGGCCTATTTTCACTTTTCCTATTACTGATGATTTGGAGAAATAAAAGGAAGAGCTCTGATCTCATACTTAATGGTGCTCAAGGTTCTAATGGAATCATTGCATTTAGATACACTGTTTTACAGGGTGCCACAAAAAAGTTTACAGATCAGTTGGGGGCAGGCAGTTTTGGTTCTGTATACAAGGGGTTTATAAATGACTCGATAGCTGTAGCAGTGAAGAGGCTTGACGGTGCTTATCAAGGGGAGAAACAATTCAGAGCTGAAGTGAGCTCAATTGGAGCTGTCCAGCACATCAATTTAGTTAAGCTCATCGGTTTCAGTTGTGAGGGTTCTAAGAGGTTGCTTGTTTATGAATACATGTCAAATCGCTCTCTTGATATCCATTTATTCCGAAACAATTCAACAATATTAAGTTGGACTGGTAGATATCAGATAGCCCTGGGGGTTGCTAGAGGGTTAGCCTACTTACATGAGAGCTGTCGAGACTGCATCATACACTGTGATATTAAGCCAGAAAACATACTTATTGATGCTTCATTCACTCCAAAAATTGCAGACTTCGGCATGGCAAAGCTTTTGGAAAGGGATTTTAGCCGAGTACTAACTACAATGAGAGGAACTGCAGGGTACCTTGCACCTGAATGGATTAGCGGCGTGGCTATTACACCGAAAGTCGACGTTTACAGCTACGGGATGGTGTTGCTGGAAATAATATCTGGAAGAAGGAACTCTTGCACATCATGTCCTGGTGGTGGCAACGCTGATGTTTATTTCCCTGTGCATGCCGCACATAAGATTCTTGAAGGAGACGTTGGGTGTTTGGTAGATCACATTTTACATGGTGATGTCAATCTGGATGAGGCTGAACTAGCTTGCAAGGTTGCGTGTTGGTGCATTCAAGATGATGAGCTTGATCGGCCAACAATGGGACAGGTGGTTCAGATTCTCGAAGGGCTTGTTGAGACTACGATGCCCCCGATACCAAGACTGCTCCAAGCTATGGCTGGAAGCTCGCATTCGACGCGCTCCTAA
>HvleckRLK55
ATGCATCTCCTTGCATATTTCGCCTTGCTCCTCTTCCTATGCATCCAAGCAAGTTCTGCTGCTACGAACACTATCTTGGCTGGCCAAGCACTTGTTGTCAATGACAAGCTCGTCTCCAAGAATAACAGGTACGCGCTTGGCTTCTTCCAAACAAGTAGCAGCAAATCATCCCAAGACACCAACTGGTACCTGGGCATATGGTTCAATACAGTCCCTACAGTAACTTCTGCATGGGTTGCGAATAGAGATAAACCAATCAAGAACATTGCCTCAATGGAGCTCACAGTCTCCCAGGATGGCAACCTTGTGATCTTGAACCGGTCCACCAAGTCCATAATCTGGTCGACAAAGGTAAACATCACGAGAAATAGCACCACAGCAGTGCTGTTGAGTAATGGAAATCTCATCTTGACAAACTCTTCAAACTCATCCGAAGTTTTTTGGCAGAGCTTTGACCACCCAACCGATACAATTTTCCCTGGGGCAAAGCTTGGGTGGGACAAGGTTATCGGCCTGAATCGCCGTCTTGTTTCTTCGAAAAACTCGATCAGCCCAGCTAGCGGTGCGTACTGTACTGAGTTAGACCCCACTGGTGCCAGCCAGTTCTGGCTTGCACCAGTGAACTCCACAGTACCATATTGGTCTAGTGGTGCATGGAACGGCATATACTTCACATCAATTCCAGAGATGGCTGCCAAATCTACTTTCAGTTCAAGATTCGTCAGCAATAACCAGGAGACATATTACTCATATAACTTAGAAGATGAAGATATGATTGCCCGCATAGTACTTGATGTCTCAGGTAGATCAAAGGTGTTCATTTGGTTGGAGGGCTCACAGGAATGGACAATGGTCTACGCACAACCAAAAGCTCAGTGTGATGTCAATGCAATTTGTGGACCTTTCACAATTTGCGATGATAACGCGCTTCAGTATTGCAATTGCATGGAGGGCTTCACCATAACATCCGCTGAGGACTGGGAGCTAGAAGATCGAACCGGTGGTTGCTCAAGAAATACTCCGTTAGATTGCATTAGCAACAAAAGCACAACACGTACCACAGACAAGTTTTACTCTGTCCAATGTGTTAAGTTTCCGCAGAGTGCCACAAAAGTAGAAGCTGCTGCAAGCACAGGTGAGTGCGCACGAGGTTGCCTGAATAATTGCTCTTGCATCGCGTATTCCTTCCACGACGGTGGATGTTCTATCTGGCATAATGAATTGCTCAACATAAGACAACTACAATGTGGTGGCACCACCAATTCAAATGAAGAAACTCTTTACCTTCGCCTTTCTGCTAAAGATTTCCAGCGATTAGAAGACAACAAAAAAAGGATTGTTATTGGAGTTGCAGTTGGCGCAGGCATTTCTGCCCTAGCATTATTTGCACTCATTCTCCTGCTACTGTTTTGGAGAAACAAAAGGAAGAACTCTGGCCGTAGACTGCATGGTGTTCAAGGTTGTAATGGAATCATCGCATTTAGATACAATGATTTAAAATGTGCAACAAATAAATTCAAGGATAGGTTGGGGGGAGGCAGTTTTGGTTCTGTATTCAAGGGGTTAATAGATGACTCAACTGCCATAGCAGTGAAGAGGCTTGACGGTGCATATCAAGGAGAGAAGGAATTCAGAGCAGAAGTGAGCTCGATTGGAGCTATCCAGCACATCAATTTAGTTAAGCTTGTTGGTTTCTGTTGTGACGGTTCTAAGAGGTTGCTTGTTTATGAACACATGCCAAATCGCTCACTGGATGTCCATCTATTTCGAAACAATTCAACGATATTGAGTTGGACTATTAGATATCAGATAGCCCTGGGAGTTGCCAGAGGGTTAGCCTACTTGCATGAGAGTTGTCGGGACTGCATCATACACTGTGATATTAAGCCAGAAAACATACTTCTCGATACTTTATTCGTTCCCAAAATTGCAGACTTTGGGATGGCAAAGCTTTTCAGAAGGGATTATAGCCGAGTACTGACTACGATAAGAGGAACTATAGGGTACCTTGCACCTGAATGGATTACTGGAGTTGCCATTACACCAAAAGTTGATGTGTATAGCTATGGGATGATGGTGCTGGAAATAATATCTGGAAAGAGGAACTCATGCGCACCATGTTCTAGTGGTGGCAACCTTGATATTTTTTTTCCTGTGCATGCCGCACATAAGCTTCTTGAAGGAGACGTCGGGAGTTTGGTAGATCACATGCTACATGGTGATGTCAATCTGGATGAGGCCGAACTGGCTTGCAAGGTTGCATGTTGGTGCATCCAAGACAATGAGCTTGATCGACCAACAATGGGACATGTAGTTCAGATCCTCGAAGGGCTGGTTGAGATCGGGATGCCCCCATTACCAAGTCTGCTCGAATCTATGACTGGAAGCTCGCACTCAGCTCGATCCTAA
>HvleckRLK56
ATGCATCTCCTCCCCATTGTTTTCACCTTGCTCTTTTTCCTACGTGCCCCAGCAAGTTCTGTCACGACGGACACCATATTGGCCGGCCAAGCACTTGCTGTCAACGACAAGCTCGTCTCCAAGAATGGCAGGTACGCGCTTGGCTTCTTCAACACAAGCAGCAGCAAACCCTCCCAAGACACCACCAACTGGTACCTTGGCATATCGTTCAATACAGTCCCCAAATTTACCTCTGCGTGGGTCGCAAATAGGGATAAACCAATCAAGAACACCACCACACCAGAGCTCACAATCTCCCATGATGGCAACCTTGTCATCATAAACCAGTCCACCAAGTCCATAATCTGGAGTACACAAGCAAACATCACAAGAAATAGCACCACTGCTATGCTCTTGAGTAGTGGAAATCTGATCTTAACAGACTCTTCCAACTCATCAGAGGTTCTGTGGCAGAGCTTTGATCACCCCACAGATACACTTTTCCCTGGTGCGAAGCTTGGATGGGACAAGCTCACTGGTCTAAACCGCCGTCTAGTTTCTTGGAAGAACTTGAACGACCCAACTACTGGTCTTTACTGTGATGGGTTAGACCCGAGCGGTCTCAATCAGTTCTTGCTTACAGCATTGAACTCCTCCATACCATATTGGTCGACCGGTGTATGGAATGGCAAATACTTTGCCTCACTTCCGGAGATGAAAGCCAGCAACCCAGTTTTCACCGCAACATTTGTCAGCAATAACCGAGAGAAGTATTCGACCGTTAATGTAGTCGATGAATCTATGGTTACTCGTAATGTAATTGACGTCTCAGGTCAAAGAAAAACGTTTATTTGGTTGGAGGGCTCACAGGATTGGACAATGATTTATGCCCAACCGAAACTTCAGTGTGATGTCTATGCAATCTGTGGACCTTTCACAATTTGCAATAATAATGCCCTTCCACATTGCAAGTGCATGGAGGGCTTCACCATAACATCCCCCAAGGATTGGGAGCTAGAAGATCAAACCAGTGGGTGCTCAAGAAATACTCCGTTGGACTGCATTAGCAACAAAAGCACAACTCATAGCACAGACAAGTTCTACTCTGTGCCATGTGTTGAGTTGCCCCAGAATACCCTAAAAGTAGAAGCTGCTGCAAGCACGAATGAGTGCGCACGAATTTGCCTGAGAAACTGCTCTTGCACTGCATATTCGTTCACCGATGAAAGATGTTCTATCTGGCATACTGAATTGCTCAACATAAGAGCACTACAATGTAGTGGCACTACTAATTCAACTGGGGAAACTCTTTACCTTCGTGTTTCAGCTAATGATTTCCACAGACTGAAAAACAACAGAAAGGGGATTGTCATTGGAGTTGCAACTGCTACAGGCATTTCTGTTCTGTGTTTATTTGCACTCATTCTCCTGGTAATGATACGGAGAAACAAAAGTAAGAGCTCTAGCCGTATACTGGATGGTGTTCAAGGTTGTAACAGAATCATTGCATTTAGATACACTGATTTACAGCGTGCCACAACGAAATTCACAGATAAGTTAGGGGCAGGCAGTTTTGGTTCTGTATTCAAGGGTTTTTTAAATGAGTCAACTGCCATAGCCGTGAAAAGGCTAGACGGTGCTTATCAAGGAGAGAAGCAATTCAGAGCTGAAGTGAGCTCGATTGGAGCTATCCAACACATCAATTTAGTTAAGCTTCTTGGTTTCTGTTGTGAGGGTTCTAAGAGGCTGCTTGTTTATGAACACATGCCAAATCGCTCACTTGATGTGCATCTATTTGGAAACAACTCTACAACGTTGAATTGGACTGTTAGGTACCACATAGCCCTGGGAGTCGCGAGAGGATTAGCTTACTTGCATGAGAGCTGTCGAGACTGCATCATACACTGTGATATTAAGCCAGAAAACATACTTCTTGATGATTCACTCATTTCCAAAGTTGCGGACTTTGGGATGGCAAAGCTTTTGGGAAGGGAATTTAGCCGAGTACTGACTACAATTAGAGGAACAATGGGTACCTTGCACCTGAATGGATCAGTGGTGTTGCCATTACACCAAAAGTTGATGTGTATAGCTACGGGATGA
>HvleckRLK57
ATGTCAATTCAACTAGGTTGGCAGCTTTGTTTGACTGTTGAAACCGCGGTTATTTACTGCTCCATGACCAGACCATTGAGCAACCATCCTGTGCTTGCGGCCTCTGCGTCCGCAACCTCGCGCGATCCGCTTCAGTTCATCATGCATATCCTCATAGATACCGCCTTGCTCCTCTTCCTGTACATCTCAGCATGTTCTGCCGCGACATCGGACACCATCCTGTCCGGCCAAGCACTCGCCGTCAACGACAAACTCGTCTCCAACAACGGCAGGTACGCGCTTGGCTTCTTCGAAACAAACAGCAGCAAGTCCTCCCAAGGCACCACCAACTGGTACCTCGGCATGTGGTTCAACACGGTCCCCAAATTCACTTCTGCATGGGTCGCAAATAGGGATAAGCCAATCAAGAACATCACCTCATCGGAGCTCACAATCTCCCAGGATGGCAACCTTGTCATCTTGAACCGGTCCACCAAGTCCATCATCTGGAGCACACAAGCAAACATCAAAAGAAATAGCACCACTGCTATGCTGTTGAATAATGGGAATCTCATCCTAACAGACTCATCAAACTCATCAGAAGTTTTGTGGCAGAGCTTTGATCACCCCACAGATACATTTTTCCCAGAGGCAAAACTTGGATGGGACAAGCTCACAGGCCTGAACCGTCGTATTGTTTCTTGGAAGAACTCAATCAACCCAGCTACTGGTGTGTATCGTTACGAGTTAGACCATAGTGGTGCCAACCAGTTATTTGTTGGACCGCTGAGCAGCTCTGCACCATATTGGTACAGTGGTGCATGGAACGGCAAGTACTTTGAATTGATGCCAGAGATGGCAGAAAACAAGATCTGGAGATCAAAATTTGTCGACACCCGCCATGAGAAGTACTACACATATAGCTTAGCTCAAGCAAAGAGGATTACTCATCATGTAATTGACGTCTCGGGCCAAGTAAAAGTGTTCGTTTGGAACGAGCGCTCACAATATTGGCAGAATGTCTTCGCCCAACCAAGAAGTCCATGTGATGTCTATTCAATTTGTGGACCTTACACAATTTGCAATGATAATGCGGCTCTAAACTGCGACTGTATGAAGGGCTTCACCATCACATCCCCCAAGGATTGGGAGTTAGGAGATCGAACTGGTGGGTGCTCGAGAAAGACTTTGTTAGACTGCATTAGCAACAAAAACACAACACATACCACAGACAACTTCCACTCCGTGCCATGCGTTGGGTTGCCCCAGAATGCCGCAAATGTAGAAGCTGCCAAAAGCGCGAATGAGTGTGCACAATTTTGCCTGAATAATTGCTCTTGCACCGCGTATTCCTTCAGCAATAGTGGATGTTCTATCTGGCATAATGAACTACTCAACATAAGACAACTAGAATGTAGTGGCATTCTGGGGCAGCTTCGCCTTTCTGCTAAAGATATCCAAAGTTTGGAAACTCTTCACCTTCGCCTTTCTGCTAAAGATATCCAAAGTTTGGAAAATAACAGAAAAAGGATTGCCATTGGAGTCGCAACTGGTATAGGCGTTTGTGCTCTAGGTTTATTCGGACTCAGCATCCTAGTAATTATTTGGAGAAACAAAAGGAAGAGCTCTGGCCGCATACTGAATGACGGTTGTAATGGAATCATTGCATTTAGATACACTGATTTACTCCGTGCAACGAAAAAATTCACAGAGAAGTTGGGGAGAGGCAGCTTTGGTTCTGTATTTAAGGGGCTTATAAATGACTCAGTTTCCATAGCAGTGAAGAGGCTTGATGGTGCTTATCAAGGAGAGAAGCACTTTAGAGCTGAAGTGAGCTCGATTGGAGCTGTTCAGCACATCAATTTAGTTAAGCTTGTTGGTTTCTGTTGTGAGGGTTCTAGGAGATTACTTGTTTATGAATACATGCCAAACCTCTCCCTTGACGTCCATCTATTTCAAAACAATTCCACTGTGTTGAGTTGGACTGCTCGTTATCAGATAGCCCTGGGAGTTGCCCGAGGGTTAGCCTACTTGCATGAGAGCTGCCGAGACTGCATCATACACTGTGATATTAAGCCAGAAAACATACTGCTTGATGCTTCATTCCTTCCAAAAATTGCAGACTTTGGGATGGCAAAGCTTCTAGGAAGGGGTCATAGCCGAGTTTTGACTACAGTCAGAGGAACTGCAGGGTACCTTGCACCTGAATGGATTACTGGTGTTGCTATTACACCAAAAGTTGATGTTTATAGTTACGGGATGGTGTTGCTGGAAATAATATCTGGAAGGAGGAACTCATGTGGACCATGTACGACTGATGGCGATCTTGATGTTTATTTCCCTGTGCATGCCACACATAAGCTTCTTGAAGGAGACATCGAGAGTTTGTTAGATCAGAAGTTAGATGGTAATGTCAATCTTGATGAGGCTGAGCTGGTTTGCAAGGTTGCATGTTGGTGCATCCAAGATAAGGAGGTTGCTCGACCAACAATGGGAGAGGTGGTTCAGATTCTTGAGGGTCTAGTTGATATCAGAATGCCCCCAATACCAAGACTTCTTCAAGCTATTGGTGGAAGCTCGCATTCAACATGA
>HvleckRLK58
ATGTCACTGATGACCATGGCCACTTTGATGGCCCTTGCCTGCTTGTGCTTGGCCCCTGCAGTGGGTGCACCGGCGACGGTCTCGGCGCGGCGTCCGCTGCGGGACAACGACACGCTAGTCTCGGCGCAGGGCAAGTTCGAGCTCGGCCTTTTCACCCCCGCTGGCAGCTCCGACGGCAGGTTCTACCTCGGGATCTGGTACAAGAACATCCCCGGCCAGACCGTCGTCTGGGTCGGCAACCGGGCGAGTCCATTGTCTGGCGTGGCCTCCGCCGAGCTCCGGGTCTCTGCCGAGGACGGTAACCTCGAGCTCGTCGGCCCCACCGCTGCCTCCGCCTCGCCGGTCCCAGTGTGGTCGTCGAACCTGTCGTCGTCGTCGTCGACACCGGGCTCGAACAACACGGCGGAGATCCGCGACAACGGCAACCTGGTCCTTCTTGACGGCGGCAACACCTCCAAGGTGTTGTGGCAGAGCTTCGACCATCCGACGGACACGCTGATTCCCGGCGCGTGGCTCGGGGAGAACAAGCTCACCGGCGAGTACCAGGTGCTGACGTCGTGGCGGAGTGCCCAAGACCCTGCACCGGGGATGTTCACCGACACGGTGGATCCCAACGGGACTAGCGAGTTCTTCTACATGTGGAACCAGTCACGCACGTACTGGCGGAGCGGCGTTTGGACGGGGCGATTCTTCGCGACCATGCCGGAGGCGACGAGGAACATCCTCTTCAACCAGACGTACGTGGAGACGCCGACATACCGGCGCGTCAGTAACGCGCTCTACAACAACGCGACCATCACGCGCCTGGTGCTCGAGCTCACCGGCCAGACGAAGCAGTACACCTGGGTGCCAGCGAGCCAGAACTGGCAACTTTTCTGGGCCGCGCCCACCGTGCAGTGCGACGTGTACGCGCTCTGCGGCGCGTTCGGCGTCTGCGACCTGAGTAGCCAGCCGTCGTGCAGGTGCCCACCCGGGTTCGCTCCGGCGTCGGAGGGGGACTGGACGCTCAGCGACTGGAGCGGTGGGTGCCGCCGTAGTGTGCCGCTATGGTGCCCGCACAACGGCTCCACGACGGACGGATTCCTGACGCTGCCCAACGTGAAGCTCCCCAACGACAGCGACTTGCTCGCCGTGGGCGCTGCCCAGAGCAAAGCAGAGTGCGAGTCCGCCTGCCAAAACAGCTGCTCTTGCGAGGCCTATACCTTCTCCGCCGGGAGGTGCGCGGTCTGGCACGGAGAGCTCCGCAACCTTCAGCAGCTCTACGCGGACTCCGGCGTCTCCCGGTCGTCAGATCTTTATCTCCGGCTCTCGGCAATAGGATTGCGAGACCTCCACAGCTCAGGCAGGAAAGGGGGGAGATCATCATGGCTTGTTCGTGGCATGACATTGCTAGGTGTTGTTGCACTGTGCGCATCGGTGATACTGGCCTGGAGGATTCTCGTTGCCCGGAGGAGGCGACGACTGGTGCACATGGCAAACGAGAAGGACAAGGGGTCCTCCTTAACCGTGTATAGCTACGGTGAGCTCCAGGCCGCCACCAATAACTTCTCGGAGCGGCTGGGCGGCGGCGGCTTCGGCTCCGTGTACCGCGGCGTCCTGAAGCAGCAAAAGGGAGGCAACACGACCCAAGTCCAAGTGGCAGTCAAGAAGCTCGAAAGTCTTGGGCGGCAAGGCGACAAGCAGTTCCGGACGGAGGTGAGCACGCTGGGGCTCATCCAGCACGTGAACCTCGTCCGGCTCCTCGGCTTTTGCTCGTCGTCGAACGAGAAGATGCTCGTCTACGAATACATGCCCAGAGGCTCCCTCGATCGCTACCTCTTTCGCGCCGGCGCGTGCCCGAGCTGGCGCGATCGCTACTGCATCATGATCGGCGTGGCGAGAGGGCTGGCCTACCTGCACCACGGCTGTCGTGAGTGCATCATACACTGCGACATCAAGCCGGAGAATATATTGCTAGACGAGGACATGTCCCCAAGGATAGCTGATTTCGGGATGGCGAAGCTGGTGGGGAGGGACTTCAGCCGTGCACTGACGACGATGCGGGGCACCATCGGGTACCTCGCGCCGGAGTGGATATCGGGGCAACCCATTAGTGCCAAGGCCGACGTGTACAGCTTCGGGATGGTGCTCTTCGAGCTCATCTCGGGACGGCGCAACTCCGAGAGGTGCAGCGAGGTGGACGATGTGGCGGGGACTGGGCGGTGCGGGTCGTCAGCCTTCTTCCCCGTCTGGGCCGCCGGGAAGGTCTTGGAAGGGGAGGTGGGCACCGTGGCCGACCCGCGGTTGCGCAACGACGTGGTGCCGGAGGAGCTGGAGCGGGCGTGCAGGGTGGCATGCTGGTGCATCCAGGACGAGGAGGCGCATCGCATGACAATGGCGCAAGTTGTGCATGCGCTGGAGGGCACTATCCATGTCCACACACCACCGGTGCCGCGGGCGCTGCAGAACCTCGTCAAACTCACGTAA
>HvleckRLK59
ATGTCGCTCATGATCATGGCCACGGTTGTAGCCCTTGCTCTGTGCTTCGCCCCTGCAATGGGTGCAGCGGCGACAGTCTCGGCGCGGCGTCCGCTGCGGGGCAACGACACGCTGGTCTCGGCACAGGGCAGGTTCGAGCTCGGCCTGTTCAGCCCCGCTGGCAGCTCCGGCGACAGGTTCTACCTCGGGATCTGGTACAAGAACATCCCCGGCCAGACCGTCATATGGGTCGGCAACCGGGCAAGTCCTCTGTCTGGCCTCGCCTCCGCTGAGCTCCGGGTGTCCGCCGACGACGGCAACCTCGAGCTCGTCGGTCCCACCGGCGCCTCAGCCTCGCCGGTCGTCGTGTGGTCTTCGAACCGGTCATCGTCTTCTTCTCTGTCGTCATCACCGGGGTCGAACACGGCCGAGATCCGCAACGACGGCAACCTGGTCCTTGTCGACGGCGGGAACTATTCCAACGTGTTGTGGCAAAGCTTCGACCACCCGACGGACACGCATGTGCCGGGGGCGTGGATCGGCGAGAACAAGCTCACCGGCGAGTACCAGACGCTGACGTCGTGGCGGAACGCCCAAGACCCTGCGCCAGGGATGTTCACAGACATCATAGACCCCAACGGCACGAGCGAGTTCTTCTACATGTGGAACAGATCCCGCGCGTACTGGCGGAGTGGCGTCTGGACGGGGCAAATCTTCGAGAGGCTGCCGGATGCGACGGAGAGCATCACGTCGTACGAGGAGACGCCTGCGTACCGGCGTCTCACCAATGTCATCACAGACAACGCAACCATCACACGACTGGTGCTCGACCTCACCGGGCAAGCGAAGCTGTACATCTGGGTGCCCGCAACACAGAGCTGGCAATTGTTCTGGAGCGCGCCCACCATGCAGTGCGAGGTGTACGCGCTCTGCGGCGCGTTCGGCGTCTGTGAGCACAGGAGTCAGCTCCCATGCCGGTGCCCGCCCGGGTTCGCTCCAGTGTCGGAGGAGGACTGGACGCTCAGTGACTGGAGTGGTGGCTGCCGTCGGAGCTCACCGCTGACTTGCGCGCACAATGTGTCGATGATGGACGGGTTCCTAGCGCTGCCGGACATGAAGCTCCCCGACGGCTCGCTCGCCGTGGGCGCCGCCCAGAGCAAAGCAGAATGCGAATCGACTTGCCAAAATAGCTGCTCTTGCCAGGCTTACGCCTTCTCCTCCGGTGGCGGGGGGTGCACCGTGTGGCATGGAGAGATCCGCAACCTTGAGCAGCTCTATGCGGATTCCGGCGTCTCCGGGTCAGAACTCCATCTCCGGCTTTCACAAGAAGGATTGGATATTCTACATGGCGCAGATAGCAAGAAACGGGAGAGAACATTATGGTTTGTTCTTGGCATCCCATTTGCCGGAGTTGCAACATTGGGCGCATCGGTGATACTCGCCTGGAGGTTTCTCCTTGCCCGGCGGAGACGACTGGCCAGCATGGAATACGAGAAGGGATCCTCCTTGACCGTATATAGTTACGAGGACCTCCGTGCCACCACGAAGAACTTCTCGGAGCGTCTGGGCGGCGGCAGTTTTGGCTCAGTGTACCGCGGTGTCTTGAAGCGGCATGAGGGCGACAATGCAATCCAAGTCCAAGTGGCAGTGAAGAAGCTTGAAGGTCTTGGTGGGCAGCAGGGCGACAAGCAGTTCCGAGCCGAGGTGAGCACGTTGGGGCTCATCCAACACGTGAACCTTGTACGGCTCCTCGGGTTCTGCTCCTCCGGCGACGAGAAGATGCTGGTGTACGAGTACATACCCAGAGGCTCCCTCGACCGCTATCTCTTTGACGACGGCGGCATGAACCTTAGCTGGCGCGAACGATACCGCATCATGATCGGCGTGGCAAAAGGGCTGGCCTACCTGCACCACGGTTGTCATGAGTGCATCATACACTGCGACATCAAGCCGGAGAACATCCTCCTGGACGAGGACATGTCCCCGAGGATCGCCGACTTTGGGATGGCAAAGCTGGTGAGAAGGGACTTCAGCCATGCTCTGACGACGATGCGGGGCACCATCGGGTACCTAGCGCCGGAGTGGATCTCCGGGCAGCCCATCAACGCCAAGGCAGATGTGTACAGCTTTGGAATGGTGCTATTCGAGCTCATCTCGGGACGACGAAACTCTAAAGGATACAGCGAGGTGGAGGCCATAGGGAGTGAGAGCAGTGATTCATGGACCTTCTTCCCCGTGTGGGTTGCGGGAAAGGTCATGGAAGGGGAGGTGAGCGCCGTGATAGACTCGCGACTACGCGGCAACGTGACACCTGAGGAGCTGGAGCGAGCGTGCTGGGTTGCTTGTTGGTGCATCCAGGACGAAGAGGCGCGACGGCCGAGCATGGCGCAGGTCGTGCAGGCGCTGGAAGGCGTCGTTCAGGTCCATGCGCCGCCGGTACCTCCGGCGTTGCAGCACCTCGTCACGCTCACGTGA
>HvleckRLK60
ATGCCGTTGATCATCGCCACTTTGGCATCCCTTGCTTTGTGCTTCGCCCCTGCTCCGGGTGCGGCGGCGACGGTCTCGGCGCGGCGTCCGCTGCGGGGCAATGATACGCTGGTCTCGGCACAAGGCAAATTTGAGCTCGGCCTGTTCAGCCCTGCTGGCAGCTCCGGCGGCAGGCTCTACCTCGGGATCTGGTACAAGAACGTCCCCGTCCAGACCGTCGTCTGGGTCGGCAACCGCGCTGCCCCCCTGTCTGCCGTCGCCTCCACCGAGCTTCGTGTGTCTACCGAAGATGGTAACCTCGAGCTCGTCGGCCCCACCAGCGCCTCTGCCTCGCCGGTCGTCGTGTGGTCTTCCAACCTGTCGCCTTCGTTGCCGGGCTCAAACACGGCGGAGATCCGCGACGACGGCAACCTGGTACTTCTTGCCGGCGGCAACACCTCCAACGTGCTGTGGCAGAGCTTCGACCATCCGACGGACACGCTGGTGCCCGACGCGTGGGTCGGGGAGAACAAGCTCACCGGCGAGTACCAGACGCTGACGTCGTGGCGCAACGCCCAAGACCCCGCGCCTGGGATGTTCACCGACACGGTGGACCCCAACGGCACCAGTGAGTTCTTCTACATGTGGAACCACTCCCGTACGTACTGGCGTACCGGCATGTGGACGGGCCGCACCTTCGCGACCATGCCGGAGGTGAGGAACAATGTCCTCGTCAACACGACGTACGTCGAGACGCCGGCGTTCCGGCGAGTCAGCGACATACTCTACGACAATGCCACCATCGCGCGCTTGGTGCTCGATCTCACCGGACAGGCGAAGCGGTACATCTGGATGCCCGGGAGTCAGAGCTGGCAACTCTACTGGGCGGCGCCCACCTTGCAGTGCGATGTGTACGCGCTCTGCGGCGTGTTCGGCGTGTGCGACCAGAGGAGCCAGCTGCCGTGCCGGTGCCTGCCCGGGTTTGCTCCGGCGTCGGAGGTGGACTGGACGCTCAACGACTGGAGCGGTGGCTGCCGCCGGAGCTCGTCGCTCACGTGCGCGAACAACGGGTCGACGACCGACGGTTTCCTACCTCTGCCGGACGTGAAGCTTCCCGACGGCGACTCGCTCGCCGTCGGCGCCGCCCAGAGCAAAGCAGAGTGCGAATCGACATGCCAAAGCAACTGCTCTTGCCAGGCCTATGCCTTCTCCGCCGGGGCCAAGGGGTGCACCGTCTGGCACGAAGAGATCCGCAACCTTGAGCAGCTCTACGCGGATTCCGGCGTCTCCGGGTCAGACCTCCATCTCCGGCTTTCACAAGAAGGACTGGATATTCTACATGGCGCAGATAGCAAGAAACGGGGGAGAAGGTTAGGGCTTGTTGTTGGCATCCCATTGGCCGGTCTTGCAGCATTAGGCGCGTCGGTGATACTGGCCTGGAGGATTCTCCTTGCTGGGAGGAGACGACTGGCCAGCATGGAAAACGAGAAGGGGTCCTCCTTGGTCGTGTACAGTTACAGCGACCTCCGTGCCGCCACGAAGAACTTCTCGGAGCGGCTGGGCGGCGGCAGCTTCGGCTCGGTGTACCACGGTGTCCTAAAGGGAGGGCATAAGGGTGACAATGCAATTCAACACCAAGTGGCAGTGAAGAAGCTCGAAAGTCTTGGACGGCAAGGCGACAAGCAGTTCCGGACGGAGGTGAGCACGTTGGGGCTTATCCAGCACGTGAACCTCGTCCGGCTCCTTGGCTTCTGCTCGGCGGGCGATGAGAAGATGCTCGTGTATGAGTACATGCCTAGAGGCTCCCTCGACCGTTATCTTTTCGGCGGCGGCGCGAGCCTGAGCTGGCGAGAACGACATTGTATCATGGTCGGCGTGGCCAGAGGGCTGGCTTACTTGCACCATGGGTGTCACGAGTGCATCATACACTGTGACATCAAGCCGGAGAACATCCTGTTGGACGAGGACATGTCCCCGAGGATCGCCGACTTCGGGATGGCGAAGCTGGTAGGAAGGGACTTCAGCCGCGCGCTGACAACGATGCGAGGCACCATCGGATACCTAGCGCCGGAGTGGATCTCCGGTCAGCCTATCAGCGCCAAGGCGGACGTCTACAGCTTCGGGATGGTGCTCTTTGAGCTCATCTCCGGACGACGAAACTCTGATGGGTATAGCATGGTGGAGGTCGCAGGGAGTGGGAACAGTGATTCGTGGACATTCTTCCCCTTGTGGGCTGCTGGAAAGGTGGTGGAAGGAGAGGTGAGCGCCGTGGCAGACCCGCGGCTGCGCGGCAACATGAGACCGGAAGAGCTGAAGCGGGCGTGCTGGATTGCATGCTGGTGCATCCAGGACGAGGAGGCGCAACGGCCGACCATGGCGCAGGTCGTGCAGGCGTTGGAGGGCGCCATCCAGGTCCACGCACCGCCGGTGCCGCGGGCTCTGAAACACCTCGTCACGCTCACGTAA
>HvleckRLK61
ATGGCACGGGTCGCTGCCACTTTCATGGCCCTCGCCTGCTTGTGCTTGGCCCCTGCAGTGGGTGCACCGGCGACGGTCTCGGCGCGGCGACCGCTGCGGGGCAACGACACGCTGGTCTCGGCACAGGGCAACTTCGAGCTCGGCCTTTTCAGCCCTGCCGGCAGCTCCGGCGACAGGTTCTACCTCGGGATCTGGTACAAGAGCATCCCCGGCCAGACCGTCGCCTGGGTCGGCAACCGCGCGACTCCCCTGTCTGGCCTCGCCTCGGCTGAGCTCCGGGTGTCCGCCGACGACGGCAACCTCGAGCTCGTCGGTCCCACCAGCGCCTCCAGCTTACCCGTCGTCGTGTGGTCTTCAAACCTCTCGTCTTCGTCTCTGTCGTCGACGCCGGGCTCGAACAACACGGCGGAGATCCGCGACGACGGCAACCTGGTCCTTGTCGACGGCGCCAACTCCTCCAACGTGCTGTGGCAGAGCTTCGACCACCCCACGGACACGTACCTGCCGGGGGCGTGGCTCGGGGAGAACAAGCGCACCGGCGAGTACCAGGCGCTGTCGTCCTGGCGGAACGCCCAGGACCCTGCGCCGGGAATGTTCTACGACACGGTCGACCCCAACGGCACCGCCGAATTCTTCATGCTGTGGAACCGGTCCCGCGTGTACTGGCGGGGCGGCGTCTGGACCGGGGGGCGATGGAGCGGCGACGTTGGAGCGGCGACTGGACGCGGCACCAACCTTTACAACACGACGTACGTCGACACGCCGGCGTTCCGGGGCACCACCACCGTGCTCTCCGACAACGCGACCATCACGCGCCTGGTGCTCGATCTCAACGGCCAGAAGAAGCAGTTCGTCTGGGTGCCAGCGAGCCGGAGCTGGCAATTGTTCTGGGCGGCGCCCACCGCGCAGTGCGACGCGTACGCGCTCTGCGGCAACTTCGGCGTCTGCAACCAGAGGAGCCAGCTGCCGTGCCGATGCCCGCCGGGGTTCGCTCCGGTGTCGGAGCGGGACTGGACGCTCAGCGACTGGAGCGGTGGCTGCCGCCGGAGCTCGCCGCTAACAACCTGCGCGCACAACGGGTCGACCACCGATGGGTTCCTAGCGCTGCCGGACGTGAAGCTCCCCGACGAACCGCTCGCCGTGGGCACCGCCAGAAGCAAAGCAGAGTGTGAATCAACTTGCCAAAACAACTGTTCGTGCCAGGCCTACGCCTTCTCCGCCGGTTGCACCGTCTGGCACGGAGACATCCGCAACCTCGAGCAGCTCTTCGCCGACTCCAGCAGCCCCGGGTCAGACTTTTATCTCCGGCTTTCACAAAGAGCATTACAAGATCTGCATAACGTACACAAGAAGAAAGAAGGGACAAAGTTATGGCTTGTCGTTGGCATCACGCTGACCGGTGTAGCAGCATTGGGCGCGTCGGTCATACTAGCCTGGAGGATTCTTCTTGCGCGGAGAAGACTGGCTGTGTCCATGGAGAACGAGAATGGATCCTCCTTGGCTGTGTACAGCTACGGCGACCTCCGTGCCGCCACCAACAACTTCTCGGAGCGGCTGGGCGGCGGCGGCTTCGGCTCCGTGTATCGCGGCGTCTTGAAGCAGCAAAAGGGAGGCAACACGACTCAACTGCAAGTGGCGGTGAAGAAGCTTGAAGGCTTTGCACGACAGGGTGACAAGCAGTTCCGGGCCGAGGTGAGCACGTTGGGGCTGATCCAGCACGTGAACCTCGTCCGGCTCCTCGGGTTCTGCTCGTCGGGCGACGAGAAGATGCTCGTGTACGAGTACATGCCCAGAGGCTCCCTCAACGGCTCCTTTTTCGACGGCGGCGCGTGCCCGAGCTGGCGCGACCGGTACCGTGTCATGATCGGCGTGGCGAGAGGTCTGGCCTACCTGCACGACGGCTGCCGCGAGCGCATCATACACTGCGACATCAAGCCGGAGAACATCCTGCTGGACGAGGACATGTCCCCGAGGATCGCCGACTTCGGGATGGCGAAGCTGGTGGGCAGGGATTTCAGCCGCGCACTCACGACGATGCGAGGCACCATAGGGTACCTCGCCCCAGAGTGGATCTCCGGGCAGCCCATCAGCGCCAAGGCCGACGTGTACAGCTTCGGCATGGTGCTCTTCGAGCTCATCTCTGGACGGCGTAACTCCGAGAGGTTCGGCGAGCTGGAGGCAGCAGGGACCTTCTTCCCTGTGTGGGCCGCGGAAAAGGTCGTCGAAGGAGAGGTAGGCGCCGTGGCCGACCCGCGGCTGCACGGCGACGTGATGCCGGAGGAGCTGGAGCGGGCGTGCAGGGTGGCGTGCTGGTGCATCCAGGANNNNNNNNNNNNNNNNNNNNNNNNNNNNNNNNNNNNNNNNGCGTTGGAGGGCGCCGTCGTGGTCCATGCGGCGCCGGTGCCGCGGGCGCTGCAGCGCCTCGCCACGTGA
>HvleckRLK62
ATGGCCTGCATCCCCATTTTGATTCTACTATCCTTGAGTTCATTCTGCAAATCCGATGACCAGCTCACATATGCAAAGCCACTCGCATCAGGAGAGACTCTCGTCTCCAAGGGCGGCGATTTTGCGCTTGGCTTCTTCTCCCCGACCAACTCCAACAGTAGCCTCTACCTTGGCATATGGTACCACAGCATCCCCAACCACACAGTTGTGTGGATTGCAAACCGCAACAAACCGATCACCTCCTCTGTTTCTCCAAAGCTTGCCATCACCAACACTTCTGGCCTGATCTTGTCTGACTCCCAAGGCCAAACTGTTTGGGCAACCAACAACAAAATCACTGCTGGAGTTACCGGAGTTGCTGCAGTGATCCTCGACACGGGGAACTTGGTCCTCCGGTCATCCAACGGCACAGTCATATGGCAAAGCTTTGATCACCCAACGGACACCCTCCTTCCCGGCATGAGGTTCGTGCTAAGTTATAAAAATCGTGTGGTTGGGCGTCTTGTTGCTTGGAAGGGCCCTGACGACCCTTCCAATGGAGATTTTTCATTTGGCCTTGACCCCAGTTCAAACCTTCAGCTTGTAATTTGGCATGGAACTAAGTTGTACTACCGCACCATGGTTCGGAACAGTATAACTGTAGGTGGAGGAACCTATCGGAGCAACACCACCTCCATCTTTTACCAAACAGCCGCTGACGTTGGAGACGAGTACTGCTATGTGTATACAGTCTCCGATGGCTCACCATATGTGCGTGCGATGCTTGACTACACTGGAAAAATGAAGACATTGAGTTGGAGTAACTCCTTGTCTTCATGGACAGTCATCGGCGAGGTCCCCACTGCCTGCGACTTCTACTCCTCGTGTGGCTCATTCAGCTATTGTGATTTCACTGCAACTGTCCACACATGCCAGTGCCTTGATGGGTACGAAATTGATGGTCTTGACTTCTCCAGAGGATGTCAGAGAATGGAACCTCTGAAATGTGGAAAGCCAAATCATTTTGTGGCTTTGCCTGTGATGAAGGTCCCGGCCAACTTCTTGCACATCAAGAACAGAAGTTTCGACCAGTGCACGGCTGAGTGCAGCAGCAATTGCTCGTGTACTGCATATGCATATGCCAACTTGAGCAGTGACGGCACCTTTGAAGACCCGTCAAGGTGCTTAGTCTGGACAGGGGAGCTTGTTGACACATGGAAGTTCAGCAACAATGGCGAGAATCTGTACCTCCGGCTTGCTGACTCTCCAGATCAAAAGAACAATTTGGTAAAGGTTGTACCCCCGATTATTGCAAGTCTGGCGATACTGACATGCACAGCCTTTGTAACAGTATGCATATACAGAGGCAAGTGGCGAAACAAGGAAATCGAACAGAGACAGATGTTAAGATATGTCAGCTCTTCTAATGAAATTGGAGGCGAATATGTGGGGTTTCCCTTTGTTAGCTTCCAAGACATTGCTACAGCAACAGATAATTTCTCTGACTCCAACCAAATTGGAAGGGGAGGTTTCGGCAAAGTTTACAAGGGGTTGCTGGAAGGTGGCAAGGAAGTTGCTGTTAAAAGGCTTAGTGAGGGTTCTAGGCAAGGTATTGCGGAGTTTAAGAATGAAATAGTTCTATTTGCTAAATTGCAGCATAAAAACTTAGTCAGACTTCTTGGCTGCTCCATTCACGGAGATGAGAGACTACTGATCTACGAATACTTGCCCAACAAAAGTTTGGATGTTTTCCTTTTTGGTGCTGCAAGACAATCTGTGCTTGATTGGCCCACACGATTTAAGATAATTAAAGGTGTAGCAAGAGGGCTTCTTTATCTCCACCAAGATTCACGATTAACTATCATTCATAGAGATCTCAAAGCAAGTAATGTTTTGTTGGATACAAAAATGAATGCCAAAATATCAGATTTCGGCATGGCAAGGATCTTTGGTGAAAACCAGCAGCATGCCAAGACTACGCGAGTTGTTGGTACATATGGTTACATGTCACCAGAATATGTGATGGGAGGTGCCTTTTCTGTAAAATCAGACACCTATAGCTTTGGTGTACTTCTCTTGGAGATTGTAAGTGGTTTCAAGATCAGCTCATCAGAACTCATGACCAACTTCTCCAACCTTATAGCTTATGCATGGAGACTATGGGAAGACGGAAAGGCCGCTGAATTGGTGGAATGTTCAGTCAGAGAGAGGTGTCCTCTAGAAGAAGCTTTACGGTGCATTCATGTAGGACTCTTGTGTGTTCAAAACTATCCTGATGATCGCCCCCTAATGTCTTCCGTTATATTTATGTTGGAGAACGGAAGTGCACTGGTTCCAGCACCAAAGAAACCCGCATATTATGCTCTAGGTAATCGAGAAGTCGCAGAAACTACAGAACAGATGGAAAATTCTGCGAACGGGATAAGCATCACAACTCTAGATGGCCGTTAA
>HvleckRLK63
GGAATTAATGGCGAGCAGTCAAGACGGCGGGCCCACCCGCTCCCTTCTCCCTCTTCTCGTTTCACATCCATMCCCCGTGAGAACAGAGCAGAGCAGAAAGAAACGCTGCCACTAGCGAGGGTAGGAGGAGGGGAGACCGACCACCGGAGCAAGAAGCAGAGGGAGGGGCCGGCCATGGCCATGCCCCTCACCGTCGCCGTCGCCGTCGCCCTCGCCGCGCTGCTCCTCTCCGCCGCCGCCGCGCCGGCGCTGGCTCATACCTCGTCATGCCCCGACGGTTGGCAAATCGGTCCTGACCGGCTTAAGTGCTTCATGCACATCTCAAGCTCCCTTTCCTGGGATGGATCCGAAGCCCTCTGCCGCAACTTCAGTGCCCATCTGGCTGCATTATCATCAGTTCAAGAGCTGAATTTCGCAAGGTCTCTCTGTGGAGCTGCCTCCTCCGGGTGCTGGGTTGGAGGGCGTCGCCGCAACACCAGTAGCGGTGTTGTTGGCTGGAAATGGTCTGACAATTCGTCTTCTTGGAACGAGACCGCCTTTCCCGGTGAGCCGCTGCATCCCAATTGCACCGGTGCTCGCTGCGGTCTAGCCACCAGTGACGATATGTGCACCTTGGTGACCAGTAAGCACACTGCACTTACTGGAAAGAAGTGCGCTGAGTCACATGGACTGATTTGCATGATGAATCATGAAGATAGATGCTACCATGATCACTGCCACAAGGAGTATTTCATCGTCCTCATCGTTGTAAGCGGCTTGATTCTCTCGACCACTTTAGCTGTTGTGGTTTGGCTGCTCGTCTATAAGCGAAGCAAGAAAAGAAAAAGATCACGCGAAGCTTCCGGTACTTCAGCTACCGCATTAGTGCCACCACTATGGAAAGTGTTCAACAGTGAAGAACTTAGATCGATAACCAAGAACTTCAGTGAGGGAAACCGGCTGCCCGGAAATGCCAAGACAGGTGGTACCTATAGTGGAACCTTGCCAGATGGATCCAAATTAGCAATTAAGAGATTGAAGAGATCCAGCCTACAAAGGAAGAAGGATTTCTACTCCGAGATCAGTAGAGTCGCAAAGCTTTATCACCCTAATTTAGTGGCTGTAAAAGGATGTTGTTATGATCATGGCGACCGCTTTATTGTCTATGAGTTTGTCGCCAATGGGCCGTTGGATGTGTGGCTGCATCATATTCCAAGAGGAGGGCGGAGCCTTGATTGGGCAACGAGAATGAGAGTTGCCACAACTCTTGCACAGGGGATTGCATTTTTGCATGACAAGGTGAAGCCCCAGGTAGTCCACCGTGATATCCGTGCGAGCAACGTCCTTCTTGATGAGGAATTTGGTTCCCATCTGATGGGGGTTGGGCTGTCCAAGTTTGTGCCATGGGAAGTAATGCACGAGAGGACCGTCAAGGCGGCAACATACGGATACCTTGCCCCCGAGTTCATATACAGGAACGAGCTGACAACAAAGAGCGATGTCTACAGCTTCGGCGTGCTGCTTCTAGAAATCATCAGTGGCCGTCGCCCAGCGCAGTCCGTTGAATCCGCTGGCTGGCAAACTATATTCGAGTGGGCGACGCCTCTGGTCCAATCGCACCGGCATCTGGAGCTGCTGGACCCGCTCATCAACGACTTGCCGGAGATAGGAGTGATCCAAAAGGTCGTGGACCTCGTCTACGCCTGCACCCAGCATGTCCCCTCGGTGCGGCCAAGGATGTCCCACGTCGTCCATCAGCTGCAGCAGCTTGAGCTCAAGTCAGCAGCGTCTGAGCAGCTGAGGAGCGGGACCAGCACCAGCGCGACTTCTCCGATGCTGCCATTGGAGGTCCGGACACCTCGCTGA
