# Supplementary material for: Genome-Wide Comprehensive Identification and In Silico Characterization of Lectin Receptor-Like Kinase Gene Family in Barley (Hordeum vulgare L.)
Source: Genet Res (Camb). 2024 Feb 27;2024:2924953. doi: 10.1155/2024/2924953 (PMC10914435; doi:10.1155/2024/2924953)
Supplement: Supplementary Materials — S1 Data: protein sequences of HvlecRLKs (txt). S2 Data: CDS sequences of HvlecRLKs (txt). S3 Data: genomic sequences of HvlecRLKs (txt). Supplementary Table 1: miRNA targeted HvlecRLKs (Doc). [file 2924953.f1.zip › S3 Data. Genomic sequences of HvlecRLKs.txt]

>HvleckRLK64
CCGAACAACATTCGGTAACCAACCATATAACTCAAATACGCATAAAACAACGTCGAACCTTAAGTGTGCAGACCCTGCGGGTTCGAGAACTATGTAGACATGACCTGAGAGACTCCTCGGTCAATATCCAATAGCGGGACCTGGATGCCCATATTGGATCCTACATATTCTACGAAGATCTTATCGTTTGAACCTCAGNNNNNNNNNNNNNNNNNNNNNNNNNNNNNNNNNNNNNNNNNNNNNNNNNNNNNNNNNNNNNNNNNNNNNNNNNNNNNNNNNNNNNNNNNNNNNNNNNNNNCAACAACGCCACCGCGTCCTTCGCCGCCAGATTCTCCTTCGTCGTCGCCAACCAGAACGCCGGCTCCACGGGCGGCGACGGCATCGCCTTCTTCATCTCCTCCGACCGCGCCACGCTCGGCGCCACCGGCGGCTACCTCGGCCTCTTCAACTCCTCGCTCGCCGACGCTGCCGTTCCGAATGACGACGACGCCGACGCCGTCGGCCCCGCCATCATCGCTGTGGAGTTCGACACCATGGTCAACTCCGAGCTCGGCGACCCGAGCGACAACCACGTCGGGCTGGACCTCGGCTCGCCGGTGTCCGTCAGCGCCGTCGACCTCGTTGACTCCGGGATCGTCCTCAAGAGCGGCAACCTCACCACCGCGTGGATCGATTACCGCGGGGCCGAACACCTCCTCGAGGTGTCGCTGAGCTACTCCGGTGTCAAGCCGAAGCGGGCCGTCTTCTCCGTGGCCGTCGACCTCTCGCCGTACCTCAGGGAGGCCATGTACGTCGGCTTCTCGGCCTCCACGGAGGGGAGCACCCAGCAGCACACCATCAAGGAATGGACCTTTCAGACCTTCGGGTTGCCGCCGGCGACCAACGCCTCCACCTTTACCAACGCCACGAGCAATGTCTCGGAGCCAGCAGTGCCCGGCGTGGCCGCCGCGAGCGGCGGCGCCACCAGCAAGAAAAGGTTTGGGCGCGCCATCACCATCCTCGGCCCCGTCGCGCTCGCCGTCGCGTTCGTGTTCTTCGCATGTGTCTCCGTCAAGAAGCTGGCAGAGCTCACCTCGAGGAAGGACGCCATCTTCCTGCCGGGGCTGCTCAAGGGGCCAAGGAAGTTCAGCCACAAGGAGCTGAGCGTGGCGACCAGAGGATTCCACGCGAGCAGAGTCATCGGCAGAGGCGCGTTCGGCACGGTGTACAAGGCGGCCATGCCGGGCGCGGCCACCACCTACGCAGTGAAGCGGTCGACGCAGGCGCACCAGAGCCGGAGCGAGTTCGTCGCCGAGCTCTCCGTCATCGCCTGCCTCCGCCACAAGAACCTGGTACAGCTGGAGGGCTGGTGCGACGAGAAGGGCGAGCTGCTGCTCGTCTACGAGTACATGCCCAACGGCAGCCTGGACAAGGCGCTGTACGGCGACCCCTGCACGCTCTCCTGGCCGGAGCGCCACAACGTGGCCGCCGGTATCGCGTCCGTGCTGTCCTACCTCCACCAGGAGTGCGAGCAGCGCGTGATCCACAGGGACATCAAGACGGGCAACATCCTGCTCGACGGTAACCTCAGCCCCCGGCTGGGCGACTTCGGGCTCGCCCGGCTCATGGACCACAACAAGAGCCCGGTGTCCACGCTCACCGCCGGCACCATGGGGTACCTCGCGCCGGAGTACCTGCAGTCCGGCAAGGCCACCGACCAGACCGACGTGTTCAGCTACGGCGTGGTGGTGCTGGAGGTGTGCTGCGGGAGGCGGCCGATCGACAGGGAGGAGACCGACAAGGATAGCAAGAACGTAAACCTGGTGGACTGGGTGTGGCGCCTGCACGGCGAGGACCGGCTCATCGAGGCCGCCGATGCGCGGCTGAACGGCGAGTTTGACAGGGAGGGGATGCTGCGGCTGCTGCTTGTCGGGCTAAGCTGCGCCAACCCCAACTGCGAGGAGCGGCCGGCGATGCGGCGGGTGGTGCAGATACTGAACCGCGAGGCCGACCCGGTGCCCGTGCCGCGGAAGAAGCCGCTCCTCGTGTTCAGCTCCAGCGCGTCCATCAAGCTGCAGGAGATGGCCTTCTCCTGTGGCGACGACGTCAGAGGAGGCTACCCGGCCGCCGCCACCACCACCGCTAACCCGGCGTCCCCGAGATCGGAGGGAGCCGGCATAGAAAGGTGA
>HvleckRLK65
GTTTGAAATGTCGATGAGCTATGATTCGCCAAAAAATGAAAATGTCGATGAGCTATGCAATTATCTCTTCCCCCTATTTTATAATGCTCTCCTCAAGCTAGATTCCTCATTGTCAAGCTTCCAGGCAAGCACCGTACCAAGGGCAAGCCATGGGCTCCCGCCGTCTTCCTACTCCTACCACCTTAGTCCTGCTGCTGCTGCTACACCTCTACTACGCGCCGCGCTGGGCCTTCTCGCTCTCCTTCAGCCTCAACTTCTCCGACCCCAGTGCCGGCTCATGGGTCGACCTGGACGGCGACGCATCCATCACTCCGCCGAGGCTCGAGCTGACGGGAAACGTCCAGAGCAGCGTCGGCCGGGCGTCGTACCGACACAAAGTGCCGCTGTGGAACAGCGACACGGGCGAGATGGCTAGCTTCACCACCAACTTCTCCTTCCGAATCACGCCGGAGAAGACCGGCGTGACAGGCGACGGGATGGCCTTCTTCCTCGGGCATTTCCCTTCGGAGATCCCGCCTACCAGCAAAGGCGGCGGCCTCGGCCTCCTCCCGGCCTTCACCGACGGGACGGGCAGCACCCGGATCGTGGCCGTGGAATTCGACACTCTCCGCAACTCGCACTATGCCGACATCAACGGCAACCATGTCGGCATCGACGTCAGCTCCGTCACCTCCGTGGCGTCCACGGACACGACGACCAGGCCGGGCAAGAACCTCACGTCCTCCTACGTTATGGAGGCCACTGTGAGGTACTATAACGTGTCCAGGATGTTGGCCGTTGATCTCCTCATCGACGATGCCTTGTACAAGGTCAATGCAACCGTCGATCTGAGCAGATGCTTACCGGAGGAGGTTGCTGTCGGCTTCTCCGCGGCCACCGGCGACTTCTCCGAGCAGCACCAGATACTGTCATGGTCGTTCAGTTCCACTCTACCTCCTCTTCCGAAGAGGAAGAACCGCAAAAAGTTAGTGATGATCCTACTATCCGTACTAGTCCCGTTGCTCCTTTTATTATTAGTGTGTTCGGCCGTGGTGCTATGGCGGCGACACAAGAAAATGGGACAAAATATGGACAGCCAAGAACGGTGTGCCAACAGAACCGACCTCGAGAGAGGTGTGGCCGCCGGCGGTCCCAGACGGTACACCTACAACGAGCTGGCTGCCGCAACCAGACACTTCGCGGAGGAGGAGAAGCTCGGGCGAGGCGGCTTCGGTAGCGTTTACCGGGGCCACCTTACGCTCACATCCGCAGCCGCCGACCATCGTGCGGTGGCGGTAAAAATGTTGTCGGCGGAGTCATCGGCGCAGGGGAGGAAGGAGTTCGAGGCCGAGGTGAGGATCATCAGCAGGCTGAAGCATCGGAACCTTGTGCAACTGCTGGGTTGGTGCGACAGCCGCAAGGGGCTCCTGCTCGTCTACGAGCTGGTCAGAGAGGGCAGCCTAGACAGGCACCTCTACAGCAAGGACGGCAGGCATCTGACATGGCAACAGAGGTACAAGATAATCCTCGGCTTGGGGTCAGCGCTGCACTACCTCCATGGAGAGTGGGAGCAGTGCATCGTGCATGGCGACATTAAGCCCAGCAACATCATGCTGGACTCGTCGATGAGCACCAAGCTCGGGGACTTCGGGTTAGCCCGGCTAGTGGACCACGACACGGGGTTGCTGCAGACCACCAAGGCCGTGCTCGGCACCGTCGGCTACATCGACCCGGAGTTCGTCAACACGCGCCGGCCGTGCACCGAGTCGGACGTGTACAGCTTCGGTGTCGTCCTCCTGGAGATCGTCTCCGGCCGGCGGCCGGTGGTGGAGACCGCGGGGAAATCCTTCACACTGCTCAGGTGGGTGTGGAGCCTGTATGGAAGGAATGTGATCCTCGACGCGGCGGACGAACGGCTGAGGGGTGATGAGGCCGAAGAGCGGTGGATGGTGAGGGTGCTTGTCGTCGGGCTCTGGTGCGCGCACCCGGACCGGAGCGAGCGGCCGTCTGTCGCCCAGGCCATGCATGTCCTGCAGTCCGACGAGGTGAGGCTGCCGGTGCTCGCGCTACAGATGTACAGGACTATGCAATACCCCAGGTCGTCCTCCGGCCCGTATGAGGCCTTCTCCATTGACAGCTCCACCTCTAGTTCCGGTTGTGTGCGTTCTTCCTTCGTCAGCACTGGCGACGACAGTCTTTCTTCTGGATCGTCCTCAACTGCATTGCTACGTCATTCCAAGGATCTAGCTAACTGATTCATCCAAATTTGTAAGTGTGGTGGCCATTATATGTAAGCATCACACTAAACTTAACATTAGGAGCAGCAAACATATTTTTCACATGTGAACCTTGTGGCAATTTTTGGGTAGGAGCCCCCTACCTCTACATCATTGTGATGCACACACAATTGTTTCAATTTACG
>HvleckRLK66
CACGGTGGCCCCGTCCACCTGCACATCGCCCTCACTATCCGTAAGCTCATCCCCGCCCCCTGAGCCACCCGGACCCTCGGTCCAATCCGGCAACTCGGTCCGATCCGGCCAGGTCTCCCATCCGGGCTTCTCCACATCGAGTGAAGCCTCCGGAACCATAGTCTCGTGGGCCGAATGCACCTCGACCCGAGGCTGCTCCTGGACCGGAGTCTCATGGGACAAATGCCCGTCAACACCAGGCTCCTGGAACGGAGTCCCCGTAGCCTCCTCCGCAAATGGGTCGACCATAGTAGTCCTATGCTCGGGTGAATGAGCTGGTGGTGGTGGCAAGGACGGCTCAACAGTCCTCCTGGATCTTCCGCGGCCACCATCTCTCCCTGTACCCTTCCCCTTCTTCCCTACCCGACCAGCACCTCTCCCAGTGGGCAATGCCGCCGACGAAGAATAACCCGCGGGTGGTGTCGACAGAATGTCTGCCAAGGCTCTACGGAGAGATAGGGGTGGAAGGGAAGTACCACCCCTCGTGCGGGGCGCCTGGGAAGAACCCGTCGAGCGATCTGGACCAGTGTCCACCATCTTTCCACACTTGGTGACCTGTCATGATAAAGATTAAAAGAAATTAGTACAACATAAAAAATTGAATAACTGACATGAATAATAATATGTACATGAATAATAAAGATTAAAATATATATAATTTAAGTTATGAATCTTACAAACTAATAATCATCATCAATAAATGCATCATCATCATCACTATCACGCATGTCTTCATGAATGATGTGCTCGTCGGGTTCAACGGCGTGAAGTTGTGAAAGGCCTTCCTTTAATCATTGAAGCATTGACAGGTCATCCGCATCAGTAACCTCTACGAGTTCCAGGTCTTCTGGTTCCGGCTCAGGGCTGGAGTCGGATTCATTGTCGCTGTCTACTTCCATGTTCTTGGGTGAAGCACGGCGGTTCTTGAAACGTTTCTTGGAAAGACGTGTTTCTTGGAAAAATTCTCCATCATATGTGTCTGGGTTAATGTGAGGTTCATAATCATGTTCATTTGGGACATGTGGTCTGACATGTGGCGCCACTTCATAAACAACATACCAACCTTCCAGATTCTTATCCGTTTGGCATGCCCACGGTAGATAGAAAACTTGGGTCGCCTGTTGAGCCGTAATATAGACATCGGAAACATCTAAATGGGTGTTTGGATTGATTTCGACTAGTTCTATATGTTCATGAGTCCTTCTAGTCTTCTTCGGCTGGAACCAATAACATTTGAAGACTAGGACGTTCGGTGGGTTTTCACCATAGAATTGAAGTTCATAAATTGCTTCAACTCTTCCATAATACTCGATAACACCTTCGCCGATAGCAGAGACACCACAATTTGTAGATTTCCGGTCGGGCATAGATAGCTCTTTGCCAAAGGTACGAAAGAGATACCCGTTGATGTTGTATTTCTCAAATGAACGGACCTTATAGTCAAAACCATTAGCGACTTGTCTCAATTCGACGTCCATAGACTCTGAATTAGCCTACAAGTTTAATACGAAACGATTATTGCATTAGCCGCAAGTTAGACCAAGAAATGAAATGGTACATTATTGATAATTACCGTTTGTTTGAACCAAGAGATGAAACCGGGATAGCCGCCTCCTGTCTTTGACAGAAGCTCATACTCTTCGACGGAATCATTTTCGATCACCGCTCCATCCGAGAATTTGGCGACGTAACGGCTGTTTGAAATATCCGGGAATAAAAGAAGTTCAAATGAATTAGAAGTTACGGGAAAATGTGCCGAGAACTCACTTGATGTACGGCCGCACTTCTGTTAGGTTGTTGAAGATATCCAACGAAATGTTCCGCCATTCTTCGACATCCAACGTTATTGGTTTCGAAGCACCGGCTGGTGCGAGCTTCCCTTTGAATAGGGTGAGGTTGGACCCACCTTTTTTAGGGTCTGCATCATTGTGCCGAGGCTTTGGATTATGCAAATTATGATTTTTGGCTTCGTAGTGTGCTGTCACAAAGTTTGCCACCTCCTCAGTAATGAATGCCTCAGCCATCGATTCTTCAATTCTACGCTTATTTTTACATTTAGCTCGAAGGGTCTTCTGCATCCTCTCAGTTGCATAGCACCAACGATCTTGCACGGGCCCACCCAATCTTGCCTCGGTCGGTAGATGTAAAATCAAATACTGCATTGGATTAAAAAAACTCGGTGGAAAGATCTTCTCTAACTTGCACAACAACTCCGGTGCAAACTCCTCCATGTCTTCTACCACGCCAGGCGACAATTCTTTCGCACAAAGAACACGGAAGAAATAGCTCAGCTCCGCCAGTACTAGCCATTCATCCTCAGGAATAAAGCCACGTAACATCACTGGCATTACCCGCTCTTGAGACCAAAGATTTTTAATTTTTCAAGACTCGCTCCCCTCTTTAGATTCGCTGCATACCCATCGGGGAACATCAAGTGCATTTTGACCCACAAGATAATTTCCCTCATAGCTGGCCTTCCAAGATTGAACCAGGCCTTTGGCTTCGACCACTTCTGCTTTCCTTTGCCTTCTCGCATGTTTTGTAACGGTCTATGACATAGTGTCTCTTGATCGACTCTAGCCTTAGTATTATCCTTTGTCTTCCCATCTATGTCGAACAATGTACCAAAAATAGCCTCTCCGATATTCTTTTCAGTGTGCATCATGTCGATATTGTGTGGAAGAAGGAGGTCTTTGAAGTAAGGCAGATCCCAGAAGTATGGCTTGTGAGTCCAGGCATGTTTTGAATTATACCCCTTGAAATACCCTGGACGCTCTGGATCAGGCTCGAGGGCGTTTAACTGATCCAGGATCTGTTGGCCTGTGAACGCAGGTGGTGCCAAGTTTTTGACAACTTTACCTTTGGTAAGTTCTTGTCTCTCCTGAACTGATGGTCAGGATCCAGGAACTGTCTATGCAAGTCAAAGCAAGAATACTTCCGACCCTCCCGCAACCAATGAAACTGAAGAGCTGCCTTGAATTGGGGGAACGGGAACCTTCCATGCACACACCATCCGGAGAATAGCGCATACGCTGGCAAGTCATGCATAGAGTACATGTACCACACATGCATTTTGAAGTTTTCTTTTCTAGCGGCATTGTCTGTCTTGACCCCATTATCCAAGCTTCTTCCATTCCATCCTTAAGCGGTTGCAGGTACACATTCATATTCTTCCCCGGGTAATTGGGCCCTGGAATTATCAACGTCAGAAATATGTTCTTTCTTTGCATAATCTGCCGGGGGGAGATTGAGTGGAATGACAAATACAGGCCAACAACTGTATTGGGTTGCCATCATTCCGAAGGGATTAAAACCATCCGTGGCGGCGCAGACTCGAGGATTCCTTGGATCTGCCGCTTTATCCTGATGCAATCCATCGAAATGTTTCCACGCTTCCCCATCTGATGTGTGTAGCATCATCTTATTCCCATCTGCATCTAGTTTGGTTCTTTTGCCCAATTTGTGCCATGTCATCTGTCTGGCTGTCTCTTCGACCATGAAAATACGTTGAAGTCTTGGTACGATTGGCATATACCGAAGAACACTAACTGCGATTTTGGTCTGCCTCTTCTCACCCATACCGTTGTCTACCACAAGATACCTGCAAGACTCGCAATTGGGACAATATTCCAAGTGTGCATACTCCTTCCTAAATAAGACACATCATTTCTCACATGCATCTATCTTCTCATAGGGAATCTTAAGTACACGAAGTATTTTGTCCGACTGGTACAGGTTTGCAGGCATGACATGGCCTTTGGGTACGAAGCGTCCAAATAGTGTCATCATCGCGTCGTAGCATTCTCTTCCCAAGTTGAATTGAGCCTTCAGAGCCATTACTTGTGCAATTGCATCCAGCTGACAGAGCTCAATGTTTTGAAGACTCCAACATTTCATAAAAGGCCTTTCCAGATTCCTCCATCTCATCTTCCGAATCCCAAGCATCATCAAAGTCTTGCACCATGTCTTCGATCCCGGTACCATGCTCGTCCGTGCGACGACGGACCACCTCAGCTCTTGTGTGCTGTATAGACTCATCATGAAATGTCCACACCGTATAATTAGGCTAAAAACCCCTCCTCTACAGGTGTTTAATCATTACAGCCTCTGTCGTCTTTTTATAGTTGTCGCATCCAGGACAGGGGCAATAGTTTTTTTCCTGGCCACTTGCGAATGCGGCTTTCACAAATTCCTTTGTTTTTACAAACCATTCTTTCGTCATCTCTTTTTGACTAGGGTGACCGGTATACATCCACGCACGATCACTCATCTTGCGTAGCTACTAAAGACAGAAGAAATATATTTATATATTATTTAGCATTTATATTCATCGGTTAATCAGGTTCGCCATTTTTATTACGTCCAGACAACCTACACGCTAATAGGTAAAGATAGGTCATATTCCCACCCGAGTATGTGTAGATTGGGTTTATTTTCCCATGCTCAGCTCCGGATCCAACGCAAAATTTCGACAGCACCTCCCCGTTGTTCTCCTGATACACGTCTCTGCAATAAACAGAGAGGATGTGCACCCGGAGAACAACAGGGAGGCACTGACGAAATTCCGCATCGGATCCAGAGCATAGCATACGGGAAAACGAACCCAATCTACACATACTCGGGTTGTCCATGGATTATGTTGGACAATTCGAAAGGATGACGGTTATAAATATGCAAAGATATGCATATTTATAGATGTCGCCCTTTCGAACGGGAGACGCATACTGGTCACGCATACTGATAAATTAATTTAATTACCTAAATCTAGAAAGTTTCATCCGGAAACCGAGCCACAATAAATGAAGGGGAGGGAGTAGATGAAATTTGTACTGACCCACGAATGCAGGGGCGAAGCTCGTACAACGCACGGGCAGGTCTTCGCACAACAGACCTCAAAGCGACGAGACAACTATCACATGTAAATCCACCCGATCAACACAAATATTCTAATTATGTCATTTTAGAGGAAAACAAGTTAAGAATATAATATTCATGAGCTAACCAAGCTTTTTATGCCATTTTGTAGTTAAATGGGCTAATTATCTCATTGTTGGGGAAAATAAGGCCAGGAGAATAAGATAGAGGATAAGAAAGAGGAGGAGGNNNNNNNNNNNNNNNNNNNNNNNNNNNNNNNNNNNNNNNNNNNNNNNNNNNNNNNNNNNNNNNNNNNNNNNNNNNNNNNNNNNNNNNNNNNNNNNNNNNNNNNNNNNNNNNNNNNNNNNNNNNNNNNNNNNNNNNNNNNNNNNNNNNNNNNNNATGTCTTTTTGGAGCTATATGGACTAATTATGTCATTTTAGAGGAAAACAAGCTAAGAATATAATATTCATGAGCTAACCAAGGTTCTTATGCCATTTTGGACTTATTATGGCATTTTGGAGCTAATTGGGCTAATTATGTCTTCTTCTGTTCTTCTCTTCTTCTCCTTCTTGTTTTTTTCTTCTCCTCTTCTTCTTNNNNNNNNNNNNNNNNNNNNNNNNNNNNNNNNNNNNNNNNNNNNNNNNNNNNNNNNNNNNNNNNNNNNNNNNNNNNNNNNNNNNNNNNNNNNACAGCAAAAAAATAACAAAAACATAATCTACCACTAAGTAACTAAAAAAGAATCTAGCTAGCACCAACTAACAAAACAGAATCTATCACTAAACTACCTACTAAATCTACTAATTAACTAACTAAATCTACTAACTAACTAAACTACCAACTAACTAAAGATAATCTACCAACTAACTAAACTACCACTAAATCTACTAATTAACTAACCTATCAACTAAACTATATATACCACTAAATCTATTAATTAGCAAAAAAACAAAAAAATCACCTTGGTTAGTAGTGGGCAGCCGGGGTGGTGACGGTCGGGGCGGTGGGTGACCTGGCCGGAGTTGGTGGAGGAGGGGGTCGCGGGGAGGAGAGGGAACCAGGGCGAGGGGTGGCGCAATGGTGGATGAGAGGGGTCGCGGGGAGGAGGGCACCAGGGCGGTGGTGGAGCAGGGCACGGAGAGGAGGGGGCGGTGGTGGAGCAGGGGCACGGTGGTGGAGGAGAGGTCGCAGGGAGGAGGGGGCAAGCTCTGGCGGCGGGTCACGGGGATAAGGGCGAGCTCCGGCGGTAGGTCACGGGGAGGAGGAGGGGGCGAGCTCCAGCGGCGGCGCGGGGAGAGAGTAGGGGGCTGTGGTGAACCGTTATGGGGGAGAGAGAGGGGGTGGGGTGGGGGTTGACGACGTTAGATCTAGTTGCCTCTTTGTCGTCTGCCCCCGACGGCAAAGTGGTAATAGGCTGACGGCAAAGTGTTGGACCGTTATGGGTTAGAGGGCGGTGTGGGGTGGGTTCTTTGGCGTCTGCCTGCATGTGCTTTGCCGTCAGCTGGCAGACGGCAAAGAGTACACTTATGGCAAAGAGGATGTTTTCCATCAGCCTGCTCTTTGTCGTCTGGTTTTGGGTAGCTGATGGCAAAGAGTGTCTTTGCCATCAGCCAGCAGACGTCAAAGAAGCAGCAAATGGCAAATTCTCTGATTCCAGTAGTGATGTTATTTTATAATTATTCATATATGCTTGTCGTATCGCTGTATTGATGTTTTTAGAAATTGTCGTATCCCGTATCGTCGTACCCGTGTTGCCGTATCGGTATCGCCGTATCGGTGCCTCCGAGGTCATAACCAAGGAGCACATAGCCGACAAGGCAGAGGAGCCGTTGGAGGACACCGACATGAAAGAGAGGGTGAAGGCCATGAAGAAGAATGTGCACTAGAGCATTTAGGAAGGCGGCTTGTCGCACGAAAACTTTGAAGCTTTTGCGAAGGCCATGAAGAATGCGGCACCACAGGAAGGGAGCGCTCAGGAAGGGGATGTGGATTTTTCCTAACGCTTTGCGCGCGCAACGCGAATCCCTGCCGCTCATCATACATGATGTCCAATCCATATGGCCCACCATTCTGTCAGCCATGCAACCTATGGTACAATATTTTATATTCTTTGTCAGGAGTTGCCGCATTCATCACGACTGTGTATACAAAGTTCTTCTAATTCTTTTGACAAAGTTCGAACACCATATTAACAAAGTTCTTCGGTTCCACAAAAAATTCTGGTAAAGATCTTTCATATCTCTAACAAAGTATACACCTAATATTCAAAAAGTTCTTTACTGTTTCAAAAAAATGTGTTTCAAATGTATCCAAGATTGATTTTGTTCTAAAGGGCTCGGCTTGAGTAGTTCAAATATGTAAAAACTTTCAAAAATGGAATTTTGGTCTTAAACATATGAGCCATCTAAATTGTTCCAAGAAAATGAAAAGTGATTGATTTAGAGGAGACACGGTAGATAAAATAAGCATGCATGCATCAGAGTGCACAGGAAGAGAGAGAAGCACGTGCAAGAAACACGCATCCCCATACAGCAGCAACGGCATGGATTGGGGTTACGCGCATAACCAGTTAGGCATAGACATATTCGTCAGGAGGGGGGCGCCTCACCCGGAAACTTCCATTTTCTAGCGGAGGGTATGAGGGCATGATCATCTGCTCCTTGAGTGTACGTGTGGTAGTGTGTGCAATTTTGCATTCCCATAGAAAATTAAAAGGATATATTTGCTGCTTTTTTGTTTGTGAGTTATTTTCGAAAATACTCCCTCCATCCCAAATTACTTGTCGTAGAAATGGATAGAAATGGATCTACCCATTTTCGCGACAAGTAATTCCGGACGAAGAAAGTATAAGACGTTTTTTTTACACTGCCGACTCTAAGCACATCTTACAAAAAGTGACAGAGATAGTACCTGAGAATTTTGGATGCGTCCATAGATAACATGATGAAGAGCATATTCGCAAAAGGAAAAAGAAAAAAGTCCAAAAGAGACCTTGACTTTATAAACGAAAGCTAAGTCAAACCCTAAACTTCAAATCCCTGAAATTGGTACACCGAGCTCTCTAATACCGGCCTATTTAAAACCTTCACAACGTTCCCAAACAGCGATTGTCGACATGACAGGTTGAATCCCGGTACCATTGACTGCAGACGTGACTGGGCCGGCCCAACAGGTGTGAAGCGTGATTTTTTTTTTCCTTTTTCATTTTTATGAGTGTTTTTTTCTTTTTCGTAATATATTTAACGCGAAAATACCAAGAAATAGAGTTTTTTTTCCATGACTGGGCCGGTTAACCATGCACTAGAGTTTTTTTTTCTTTTTCATAAGGAGCCACGTAACTAAAAATACAAAAGAAAGTAGACAATTCAGATGAATCGAACTTGAGACCAGTTGTTGCCAACTAATGGTTGGTAATGCTTGATTGAGAGGCCCGAAATTATTGACCACATATGGAAATTCGAGATTCAAAAACATTTTTAAGGGTAAACAAATATGGAAAACATAGAAAGTTTGTGATATCTCGAAAAAATTAAAGTGTGAATACTCTTTGAAAATTATGAAGACTTATTAATAAATGAAACACTTTTTGAAAACATAAACATTATTTAAAAAATGGGAACAAATTCTGTAACCTGAAAAAAGTTAAAGTGTGAAACTTCTTTTTAAATGGAAGCCACTTTTGAGACCTGAACAAATGCATGAGGAAAACGTTGAATACTAAAAAAATGAAAAGCTTATTGTAAACAGAATCAATTTTTAATGTGAACACTTTTTGAAACATAAACATTTTTTAAAAAAGAAAGCGAACAAGTTTTGAAATCTGAACAAAATTTCAAAGTCTAAATAGTTTTTTATTTTTTTTAAATGGGAGCAACTATTGGAACCCGAACAAATGTGTGAGAAAAAATGTAAATACTTTAAGAAAAAACTGAACAGCATTTTGAAAATAGAATCAGTTTTAGAAAAAGTGAACAATTTTTAAAGAATGTTGAAAATATGTATTTACAAAAATTTTACATAATGTATTTGAAAGTATTTAAATTGTATCAACAAATGTATCATGCGCATGTTAGAAATATACTTTGTCTACTGAGACAAATTAGAGATGCGTACAAAGAAACAAAAACCAAAAAAATCAATAACGATCAGAAAAGAGCGAGCACCCGACAGAACGACTGCTCTTATGGGCCGGATTTGATTTGTCATCTCAGTAAATACCAGCAAAATACTCTCAAGGTTTAAAATAGACCGGGATCGAAGAATTTGGTATGCTAATTTCAAGAATTAAAAGTTCAGGGTTTGATTTAGCTTTCTTCTACAAGTTTAAAATTTGTTTTGGACTTTTTCCAAGGAAAAAACGATGAAGAGCAGCAGCGTAGCCCCAAGGCCGAGACAGGGAGGCTGCTGCGCGGCCTTGCCAGGAATTAGTAGGAGGCAGGATGTCAGCCACTTCCTATTCAACACTTAAAGCGCTAGTTATACACAGCACACACACACCATCTAATCGATTATGTAGTGAGCCGGCCCATGTGGAAATTTTTTCCGCTGGTTTTTGGAAGGTTTCCCCAGGATTTCGGTGCGGTTTTTTCTGTGGTTTATTTTAGAACGGCTTTTAGTTGATTTTCTTTTTCTTTTTCTTCTGTAAATTCATGATTATTATTTTCAAATTCATGAACTTTTGTATATCCTCAAATTATTGTCAAATTCATCAACTTTTTTTTAAATCACAGCTCCTTTCCAAATCTATGAATAATTTTTAAATCCGCAAACTTCTTTCGAATGAATGAACTTATTAAAATCCGCAACTCTTTTCCAAAACCGTGGTTTTTTTCAGTAGTGAACTACTAAAACAGTAAAGGTACGACAAACTAGCCATGTTGAAATCAATGTGATGAAGTGGCAGTGCATTAAATAAGCAGGTCTATTTTCGATCAAGATTCCTTTTCTCACAAGATTGCTTTTCGCACAAGAATTTGATTGGAAGGGGAAGAAAGGAGGGGAGGGCATACCTCTGCTGGGACATCGTCTATGACCTGCAGCTCGTCAGGAAAGGGTCAGAGATGCTCCTGCTCCTGCTCCTACAAGCTTCCGGTCCTCTATAGGGAGGCCGGGGCACCGCATCGAGTGCCGGCAATAGGGCGCAGGTGGAGCCCATGATCGCCCTCGCGGGTACAAACAAGAAATTGAGTTACATCAGTTTTAAGCAACCAGAAGAATAGCTATTGATCAGCCGCCTCCACCGGATGAACACAGGAAATCGGAGCAGAGATCACCCTGGAAGAACATTTACCAATATGTAAGGCAGTAGTACGCAGCTAGCCATTGTTACACTTACATCTATGAGTCGAGTAGAAAAAAAGTAAAAGATCATAAGCTGCATTTGTACAGCCACCCTACATAGACGTACTGCATTTGTAAGAGATCATAAAAGTCGAGTAGAATAACATCTCACCCCCACATATATAATAGACAAATCGGATTCAACCAATTAAGTAGTGTTGCCACACTAACAATGACTAATACCCAACATAGACGACTGAGTTATGACTTCGAGAAGCCATGGTTGGCATATGTATACGACTGACTTGTGCAAGTCAAAGATTATGTCACAACTTGAGAACTTGGCCACATGCACCACACTCGCAGCAAGGTAATTTCCACCAGTCACAACTAGATAAGAAAAATATATCTGCTCATCAACTAGTCAAAGATTATGGCAACACAACTTGTGAAGAACTTGGCCACACTTGCAGCGAGGTAATTTTCACCAACCACAACTAGAGAAATATCTGCACACCGACATCACAACTAGCTTTCATTGACCTTGACTTTGCAATGTAAAACTGATTCCCTTCTAGCTCAGTCCACACGTGCTTGATAGAAGCCAGCAAAAGTATGATCCAAAGAAACAATATTTTGCAGTGCACAATACAATCAATACTGCAGGAGTTGGTCAGGGGATGCTTTTCCAGAGAATCTGACCAACTGCAGCAAAATACAGTCAAATAGTACAGGGCAAGCTTGCTTATGTGATTATGTTTATCCATCTTTCTTCACTTCGCTTAGTAACTTCTTCTGGTCATCAGGAGACATGGATAGCATTAAGCGTCTCTCCTTGCTCCAACATCTCCTCTTCTTCTTCTTCCTCGTCCTTGATCTTTCAGAGCTTGCTGTCGGGAAACAAGACCAATTCGTCTACTACGGTTTCGCTGGTGCCACCCTCGCCCTCGACGGTGTGGCCACCATCACACCAGACGGCCTTCTTGAGCTGACCAACGGCACCTTCCGGCTCAGAGGTCATGCTTTCCACCCGACTCCATTTTACTTCGGCAAGACGCCCAACGGGACAGCAGTTCAGGCGCCTCAGTCCTTCGCTGTCTCCTATGTGTTTGCCATCTACTGCGTCCAGGCCCAGACCTGCGGCCACGGCATGGCCTCCGTCGTCGCCGCAAGCAGCAACTTCTCCGACACCATGCCCACACAGTACCTGGGGCTCATCAACGACCACAACAACGGCGACCCAGCCAACCGCTTCTTCGCTGTCGAGCTCGACACCAACTGGAATGACGAGTTCAAGGACATCAACAACAACCATGTCGGGATCGACATCAACGACCTCGTCTCCGTCAACTCCAGCAGCGCCGGCTATTACGACGACAGCAACGAGGGTAACTTCCAAAACCTGACGCTCGCGAGCTATGAAATGATGCAGGTGTGGGTGGAGTATGATGGAGGACGCAGGCAGATCAGTGTGAGCTTGGCTCCCATAAACATGGCCAAACCCACAAAACCACTGCTCTCCACCAGCTACAACCTCTCAACGGTGCTCCCAGATATGGTTTATGTCGGCTTCTCTGCCTCAACGGGCTCATTCGACTCGCGCCAGTATGTGCTTGGTTGGAGCTTCGGCATCAACAGGCCTGCTCCAGCAATTGACATCACCAAGCTGCCCAAGCTGCCTCGTCAAGGCCCCAAGCCTAGATCCAAGGTACTGGAAATCGTACTGCCAATAGTTTCCGCAGCATTTGTTCTTGCTGTGGGCGCCACTGTCATTCTCCTTGTCCGAAGGCGACTACGATATGCCGAGCTTAGAGAAGATTGGGAAACTGAATTTGGGCCCCATAGGTTTTCATACAAGGACTTGTTTCANTGATGGAGGACGCAGGCAGATCAGTGTGAGCTTGGCTCCCATAAACATGGCCAAACCCACAAAACCACTGCTCTCCACCAGCTACAACCTCTCAACGGTGCTCCCAGATATGGTTTATGTCGGCTTCTCTGCCTCAACGGGCTCATTCGACTCGCGCCAGTATGTGCTTGGTTGGAGCTTCGGCATCAACAGGCCTGCTCCAGCAATTGACATCACCAAGCTGCCCAAGCTGCCTCGTCAAGGCCCCAAGCCTAGATCCAAGGTACTGGAAATCGTACTGCCAATAGTTTCCGCAGCATTTGTTCTTGCTGTGGGCGCCACTGTCATTCTCCTTGTCCGAAGGCGACTACGTTATGCCGAGCTTAGAGAAGATTGGGAAACTGAATTTGGGCCCCATAGGTTTTCATACAAGGACTTGTTTCACGCCACCAAGGGATTTAAGAACAAGAATCTACTGGGATTTGGAGGATTTGGAAAGGTGTACAAGGGTGTGCTTCCAATGTCTAAAGTGGAGATCGCTGTGAAAAGGATCTCCCATGACTCTAAGCAGGGGATGAAGGAATTTGTCGCTGAGGTTGCGAGCATCGGCCGCCTCCAACACCGCAATATTGTGCAGTTGCATGGTTATTGCCGTCGCAAGGCTGAGCTCCTTTTGGTGTATGAATACATGTCCAATGGAAGCCTTGACAAGTACCTGTATGATCAGGAGAAGAGGCCTACTTTAACTTGGGCCCAGAGATACAAAATCATCAAAGACATTGCGTCTGCCTTGCTTTACCTTCACCAGGAATGGGAGAAAGTTGTATTGCATCGAGACATCAAGCCAAGCAATGTGCTCCTCGATGATGGACTGAATGGGCGACTAGGTGATTTCGGCTTAGCAAGGTTATATGACCACGAGACTGGCCCTCAAACTACACATGTTGTTGGCACCATTGGATACCTAGCTCCTGAGCTAGCACACACCAACAAAGCAACCCCACTTAGTGATGTGTTTTCCTTTGGCATGTTTGTTCTCGAAGTCACCTGTGGACGGAAGCCCATCGAGACAACATCACAAGGCAACCAACTCACCTTGGTCAACTGGGTGATTGACCATTGGCACCAAGGATTTCTCACAGATGCAGTGGATACCAAGCTCCAAGGTGCGTACAATGTTGATGAGGCATGCCTAGCTCTCAAGTTAGGATTGCTGTGCTCACACCCACTAATCAGTTTAAGGCCCAACATGAGGCAGGTTATGCAGTATCTCAATGGTGATATGTCACCCCCAGATCTGAATCTGACACACATGACCTTCAACATTTCATCCTTGATGCAGAATGAAGTTTCAATAGACGACGTGCGTGCAGCCTTGATGGTGTAAATTCCACTTTCTTCTTATTCCAATTTAGATGCACATTTTTTCCAAACTCTACCATTGAATCAATATATGATGTGCAATAAATTCATACATGTGGAAGACGTATAATAATTTTCCCGACCCCACCTAGTGTGGAAGCTTCTACAACTGGGTTTGTCCTTTTTCTTACGGTTGAGTTTGTCTTTGTTTGGACTGTGTGCATCTTGTTCTGTAGAGACAGTGTGTGAACTCAATGCAGTCGCATCGTCTCGATGCAACATTGGAGTCAATAAAGCTCCCATTGCTGAAAGAAGGGTAGTCCTTTGACAATTCATGACAATGACAATGCGGCATGCTACACTGCTAGACGTCTGCCTTTATCAAGCCAAGCACGTGTGGCCATGGAAAAGCTACATGGACGACTGACTTGTGAGGCCATGTGTAGTAGTCAATATGGAAAGCTATGTATAGACGCAGATGAAGACCATGAAATAAATTATGAAGGCATGCGTGGCTACAAATAAACTACAGCCGTGCAGCAAAGATCTTCCCACAACTTTTGCCTAAGCATCTATCCTGAAAGTCATTCCCCCCAAAAAAAAATCTATACTGAAAGTCATATTCCTTCCTTCGTACGTAATCTTTACACATGACTATTAAGTCAGTCTCTTGAAAAAATTACTGGAGCTATGTGTCTAGCAGATATTAAGTTGATTCCTCACCTTTATCTAGTAATGATAAATAGCTACCATAAGTAAAACATAATTAAATTGAAATTTTATTCTGATTTATGCTCCAGACTGTGTAAATTTGGGTTTCAGTTCTTTTCAGCAAACAGTGAAATATTTATTGCTTAATATACAAATCAGAAAAAACATGGTGCAGTCATCATGCATCAAGATAGCCTGGGAAAAATAGTGGAACTCTCGTGCTTACCATGTTATAATATTTCTAAGAGTTCCCAAGACATGAATGTGAATAGGATGTGAACCAAACTGTATAAAGAAAGCCTGGGAAACAAATAAAACATCTTGATATTGTGCGAGAAACAGAGTCTACATAGTGCACTGAAAAAACAAAGAATTCAGAATTATCTACTACTCAAAGTATAAGATAATAAAAAATGTGAAGAACTAAGATTTAAAACACTTAGAAAACTGCCCTAACAAGAAAGAAAAAACTTAAAACTGTTTTTCGGGTACAATTTAAATTATTTTTTGAATATATATTAACTAAACATGGATATCCAAATAGGGCTATCCAGATATTATCAGAATTATCTGACACCAACTAAAATCTGAGACGAATTATTTGACTTTGATATTTGAATAAGAAACTAACCAGCACCAGATTGGATCGCAATTAATTTGATCGGTCGGATGGTCAGAAATAACCATTCCATTTACACTCTGGTTGTTGGATTCAGTAGCTGGCGGCCTGGCATGGGCAAAGTTGGTCAAAAAATATACAGTAATGCTCCTATATTTCTCATGATGCGCTTGCCGATGCGCAGGTCTTCTCTTGATATGGCCTTATGAACCATAAAGAATAACTTGATAGTTGTTCATAAAGCGAGAACGATTGCAGGAAAAAGAAAGGGCTAGATGGCACATCATATAGTAAACAAAGCACATCCAATGACCAATGTGGAAAGTTACATAGACGACTGACTTTTCAAGTCATGCATGCATGTGTAGCCATGGAAAGCTACATAGACTTATATATGAAGCCGTGTGTAGTGGAGAATATGAAAAAGTAAGGACGACTGACTTTTGCACTGAAGTCATGAGATGAGTGGCCAAGAATTCCCTTCCCTGCAAATAAATTACAACCACAAGGGTAAGATTGTGCACTGAAGTCATGTATAGCTTGTTTTTCCAAAACGTGTTTTAGGTATAAAGTACCAGCATTGTCAATATCGGACGAAAATGCCTGTGGAAAAAAGAGGGCAGGATAGCAACTCGACCACATCTCACATCACGTTAAATAGAATTGCAGTCTGCTCCAGCAAGCACAGAAAAGCACCCACCTCACATGAAGTTCTTCCTCCTCTGTTTCCTCCTCTGCTTTGGCCTCGAGCTTGCGTTTTTCACTGCAGCAAGTGATGACCAACTCTTGTACCATGGCTTCACAGCCGGTACTAACCTCACCATCGACGAGGCTGCTTCAGTCACGTCGAACGGACTCCTTGAGCTAACCAATGGCTCACTTGGTTGCAAAGGCCATGCGTTCTACCCAACTCCGTTGCACTTCCGCAAATCGCATGATGATGCCGTGCAGTCTTTCTCAGTCGCCTTTGTGTTTGCCATCCACTCCAGCTACCCCATCATGAGCCGACAAGGCTTGGCTTTCGTCGTCGCCCCAAGCATGAACTTCTCAAGTGCATTGGCGAATCAATACTTGGGCCTCATGAACTCCCAGAACAACGGCAACTTGAGCAACCACATCTTCGCCATCGAGCTAGACACCGTCCTAAATATCGAGTTCAAAGACAATAACACCAACCATGTAGGTATCGACATCAACAGCCTCCAGTCTATAGAGTCCTACCCTGCAGGATACTATGATGATAGGAACGGTACCTTCCAAGACATGGTCCTAGCTAGCGGTGATGCAATGCAAGTGTGGGTGGACTACAATGGTGACGCCAAGAAAATCAGCGTGACCATGGCTCCCCTTCAAATGGAGAAACCTACAAGGCCACTCATCTCGGCAGATTATGACCTCTCAAGTGTGTTGCAGGATCCATCCTACATCGGCTTCTCATCTTCAGGTGGAGAGGTCGACTCACGACATTATGTGCTTGGTTGGAGTTTTGGGATGAACAAACCAGCCCCACTGATCAATATTGCAAAGCTGCCAAAGCTACCTCGTCCAAAGCATCAATCAAAGCTGCTGAAAATCATCCTACCTATAGCGAGCGCAATTTTCGTATTTGCTGTAGGTTCTATGGTCATTTTACTTGTGAGGAGAAAGTTGAGGTATGCTGAGCTAAAAGAAGATTGGGAGATCGAGTTCGGGCCACATCGGTTCTCATACAAGGATTTGTACCATGCCACAGAAGGATTTAAGAACAAACACCTACTTGGTGCAGGAGGGTTTGGGAAGGTATATAAAGGGACCCTTCCATCAACTAAACTAGAGGTTGCTGTGAAGAGGGTATCCCATGACTCCAGACAGGGTCTAAAGGAATTTGTTGCTGAGGTTGTCAGTATTGGCCGCATCCGACATCGTAACCTTGTTCAGTTGCTTGGCTATTGTAGGAGAAAAGATGAACTCCTTTTGGTGTACGACTGCATGTCGAATGGTAGCCTTGATAAGTATTTGTATTGTGATGATCAAATGCTTATACTAAACTGGGCTCAGAGGTTTCGGATAATAAAGGATATTGCATCAGGCTTGCTCTACCTCCATGAGAAATGGGAGAAAGTGGTCATCCACCGTGACATCAAAGCAAGCAACGTACTCCTCGATAGTGAAATGAATGGGAGACTAGGGGACTTTGGCCTTGCAAGACTTTATGATCATGGAGCTGATATGCAGACCACACATGTGGTTGGTACCATTGGGTACCTAGCCCCAGAACTGATATGCACAGGTAAGGCAACTCCTCTCACCGATGTGTTTGCCTTTGGGATTTTCCTTCTTGAGGTTGTCTGTGGGCAAAGGCCAGTTAACATCAATGCACGAGGAAATCAACCTTTGTTAGTTGATTGGGTTCTTGAGCATTGGAATAAGGGATCACTGACTGAGGCAGTAGATACGAGGCTACAGAATGACTATAATGTTGACGAGGCATGCCTAGTGCTAAAGCTAGGACTACTATGTGCACACCCATTTACCAATGCAAGGCCCAACATGCAGAGTATCATGCGGTACCTTGATGGCGATTTGCAACTCCCAGACTTGACAGATACAGACATGAGCTTCAGCCTGCTCTCACGAATGCAGGGTGAAGGGTTTGACCGTTACGCATTGTCATGCCTTTCATTAAACACGAGCATTGGCACAATATCTGGTCTTTCAGGAGGAAGATGAATCAATGTTGGTTGATGTTATCATATATGTGAGCTTGCATGATGCCACATACCCCTATTTAGTACCAAGTCATGCAACATTGCGGCTAGGTTAGACTTCTCAGAGGCTTTTCTTATTGTGAGAGTAGTGTATAATTGCTTTTCGAATGCTGTTTACAGCTCATAATTTTAATATGTAAACGAAGAAGCTACCTTTGTACCTATGGGTTGATTTACATATGCATCATTCAGTTGCTTATTACGTGGTGTTTCACAGCCCACAGACAAATACTATCTTTATATTGATGGGTTGATTTACATGTATTATTCAGTTTCTTATTGTATGGTGTTTTACAGCCCACAAATGTATATATATACGACATAGAAATTTTGGGAAGTGTATCTACCTCCCTGGAGGAGGTCGCGTTTGTACAGTAATTAGTTACAAACAGAGTATATGTAGGATTGCGGCCATGTCCACCATTAGACATGACGCACAACGATGCGGCGGTGGTTCTGCAGCATATCTTCCCTTCTCCAACACCGAAAAGATGACGACGCCCCATCGCAAGCTGCCCCCATCACGCCTCCTCCCCTCCCCTGACCACCCCAGGAGCCCCATGATGCCATTCCTCTGTTGGCACCGAGTGTTACCACCCTGCGAGCTCGCCACCGAGCCCATTATTCTTTCCAGCCTGACTAGATGAAATTAATCTTCCAACCCCACCCACATCTAACTCCAACAGCAGGCAACTTTAAAACAAAATGAGAAGTTTCTACAATACTTTATTTAGCTTATTAAGTCGCAACTTAGCAAGAACTGAAAATACAGATTGGCTGGCTTCACAGGAATGTTATACTATAACCACTAGGTCAGACCAGTACGCAGAGATGGCAATACATATCAGTGTGCCAGACTAGAGCAAAAGCCAAAATGATTTCCATGAAATGTAAACCAAGACTAGAATAATTACCAGCTGATCTTGTCGGAGGTCATTTGACTCATCTCCCTTTCTGAAAATTATCTTGGATGCTTCCCCATTCGCCGTCTTAAATGTAAGACGCGGTGGATTTTAAGGCACTCTTGAATACAGATGACTCTTACGTGAAACACTAGCAAAAGGATGAGTGTAGCTGCTAATGGTGAAGGAATTGGCTGAAACGAAATTACCAAATTAAATCAATTAAAGAAACTAAGACAAGTTAATCCATGTATATATGATCCATGTTTTCTAGCATTCAACAGTAAACAGTGAGAAAGTTATGATGTAACACGTTTTACCTCATCAAAGTTAGTATGCTCACTAACAACTACTGACAACACTTATCCCAATTTCTCGACTATCAAAGTTAGTATGAAACTAGGAATTTCAATATTTAATAAAGCTGAAATAGACAATAGATCGTAACATGTGAGTTTATATGCAGTAGTTAAGTAAAATATTAAGTTGCTGATCATGAGAACCAAATGCTGACAGAGTCATCATCACATCAATTGGTTCACACTTTCCATTTTCAATCAATACAGCAGCTTCTTTAGCTTCCCACGCATTATCACAATACTAAACATTGCAAATTATATCAAGATAAATGTGTATTCGACAGCTAGACATTATATAACAGGCTGCCTGGTCTTCTAGAAATTAGATCAAGGAATGTGAAATAGACACGCAGAAGTTATCACATAGATTCCTTTCAACACAGATAAAGTTTGAACTGGTAAAAAAAAGTGGCACTTCTTTTCTTTTTTTTTGAACCTAAAAAAAAGTGACATTAGAAACCCAATTCCAGTGTCCTTTGCATTGATCACTGGACATGACCATATTATATATTAATGAAGTCTTGGACTCGTACGGTCCAACATGCCTAGAAAGCAAATTTCCTCTGATGCACATACGAAATACGACAGTACTAAACATAAGTCTTGGACTCTCATATGGATAATTGGATGTTTTAACTAACTTGGATTTCGCTCACTTCCACTGAACAAATATTAGGTTACTCATCAACATTTTCAAGAGCATAATTCCTCCTACATTCAATACAGCTATCTCTTGTAATCTGATTTTTCGGGGGCTTGCCCCCTTTTTGGGTAATAAATTCAGGTGGTCGAGGGGCTTCCCCTCCTCTCCTGGTGAAAATTCAAAAAAGAAATGTGTATAGCATTAATGCTGGACGGCAATCAACCACACTACATTCGCGGTATGATATGTTTATTCTCCCGGACATGTTAGGAAACTCGAAACATGAAGAGTGAAGAGAAGACACATACAACTCTGATGGTAAATCAGTTTCAACCTGGAAGACAAGTCTGGGTTGTGGGTTGGAAGCTGCAGAATTCACCAACTAGGTCAGGACAGGGGAGCAAATGTTCCAGCATCTCCCAATCCTCCTTAAATCTGTCCACAGCGCTGAAGGCAATCCACTTGGATGTTAACGAGCAACTCACCTCGCTCCTAGTCCTTAGGAAAAGTGAAGAGGGAGGTCAGAAGAGAGTGGAGATCTGCGGGCAGGAACATGAGGGGAGGGGAGGAACAAGTGATNCCACGGCCATGGACGGACGGCCGGCCGGCCGGCTAGTCTGCCAGCGTGGGGTGGTGATGAGTCCGGGAGACTCGTTGTGCCGTCGGCAGCAGCCGCCGTCGAGAAGGAGTCCGGCTGGCTGTACAGGGGTTGGCGCGCGCGGTGGCGGTGGTGATCCGGCCGGCCTGGCTGCCTCGTCGTCGCCACTCTGCAGAGAGACAGAGATGCAAACCGGCAGGTGTAGCTGGGCTGGGC
>HvleckRLK67
GCCGCCGCCGTGACGGCTACAGCAGACCGGTGGGTGGCGCGGCAGTCGGCGTCGTCGCACCCGCACCTGGACCGCATCGCACGAGGAAAAACGCCACGGCCGTAAAAGCTCGCAACAGAGTAACAGACCGCTCCTCGTCCTGAGCACACTAGTAGTACGATCCAAATCATCTAAGAACAAAAGGTAAACTATTTACGCCCTCCCCTTTGCACCCACTGATCTGATCTGCAGTGTCCCCTTTGCACTCACTGATCCAAAATGGCATGCAACGTAGTCCAAATAGAAAGCAGAAGCTCCAAAGTAAAGCATGATAAGTACTCTCTTCGTTTCTAAATATAAGTTTTTTAAAAGTTTTCACTAAAATACTATATACGGGTGTATAAACATACTTTAGAGTGTAGATACACTTATTTTGCTCCGTATGTAGTCCCCTAATGAAATCTCTAAAAGGACTTATATTGAGGAACTGAGGAAGTAGAACCAAAGTCTGCTGCTAATTCTTGTTAGTTCCAAAGTAAAGCACTAAGTAGAACAAAAGTTTGCTGCCAATTCTTGTTTGTTGTGTAAAATGAAGCGGATAAATATGTTCTTCTAAAGATTCTTTATGCTTTGGTTTGCTTCTGAACTTCCATGTTAGCCTGTTAGTTTTTATTCCCTTGATTTTTAAAATTTTGCTGGTAGATTGGCTAGCAGAAGAAACAGTCAGTATTTTTTTTAAATCTTGGACTGTATGACAAAGCTATTTGACTAAGTGGTAAAACTGTAACAAGAATCTCTCTTCTTTGTATGCTAATGTATTATTGAGGATCTAGCGGTGAAGCCATAGGGTAAAATAGCACAGGAATTCATGGAGTTTTTTGAACTAGATTATTTAACATGATTTCATGCATATATTTATTTACCTGTTCATGTACTCCCTTCGTCCGAAATTATTATTATAGGTCACCGCTAATCTAGATACATCCATTCTTATGATAAGTATTTTCAGACGGAGGGAGTTATTATTAAAGGTCACCACTTATGTATTCCTATTCCTGTTAGGTTGGTATAGAAAATTTTCTGACTGGGGATCAAGGCTTTAATGTTACTACTGGAGCAGTTTGTACATTTTTTGACCTTCTTTACTGGACATAAGGGGGAATAGGGAGGCCATCCTAGTAGATGACTATACATGTGGGTGTTTGCGTGTACCATCATTGTATTTAGGGTTTGAGGCGCTAATCTAGATGTTTTTTTAAATGTAATCTAGATGTTCGTTACCTTGATGTTCGATGGAGAATAAATTGTTATTTCTGGAGCGGCGGTCAATAAACAGAGCCCTTCAGTGTTTACTTGGTGCATGAGAAGTTGTATTTTCTTCGGAGTTGTCATGCCGGCATAACCTCAGTTGAACCAAGAGCTGTGGCATGCGTGCTTCAGCGGGTTGATTGATAAACTCGAGCCAACAAGGGAGCGGATGTTTCATCGCCGCCTCTGATGGTAAGCATGATCATTTCTATCTCGGTACTGGTGTCACAGGAGCAGGCCTGTGCATTAACAAGTATGCTTTGTTAAAAATGTAAACCTGCCTGTTGCGATATCCGAGAGAGTTCTGCTGCCAATTTTTGTACTGTACGTACTACGTTGTGGTTTTGTGCATATACTTGCGTCGACTCGTCACCTGTGGTAAGTTGTAAATTGGTCTTGTCTAAGCAGTGCCCGCTCCTGTCATCAAGCAGTACATGAGTGCCCTCCGTTCCTAGTGATGCATGGAGATCGGTACTGATGAGCAATTATCACCCTCACTAAAGCTGTGGCGACAGCAGGCGTCAGTGCGGACTTGCACCGTGAGTACTTTCCACGAGTCAAGGTAAAAAGATCCACAGGCTAAAACAACAATATGGCATACAGGATAGAGATGAGAGGCGAAGGCAAGCCGAGCAATGCGTCCGCATCGCTGCGCATGATCCTACTGCACTACTGCTGTGCTGCTTGTTGGTGCTGAATGGTGTTGGTTTCGGCCTCAGCTGCTCACGCGCGCGCTCCCCCCACCACTCTGACTCCGCCACCCGCGGCCACCGCACCGCTCTCCTCCTCCACCCTACCGTTGCCTCGCCACAACGCCACGGCCACCCAGGTCGCGCGCACGTGTCCCCGCCTCATCTCCCACCTCACCTACTCTCTCCCGGTCGGCCTCAGCTCAGCTCACTCCCCCCCGCGCTCCAGCCCATGTAAATGTCTCGCAATCCCCACGCCACCTCCAATGCCGCCCGCAATGGCCACGCTCACCACGACCGCCCCTCCTCCGCCCCTCATCCTGCTCACCACCCTCCTCCTCCTCCTCCTCGCTGACGCCGCCGCGGTGCGTTTCGACTACGCGACCCTCACCCTCGCCACGCTCGAGCTGCTCGGCGACGCGCACCTCAACAACAACACCATCCGCCTCACGCGGGACCTGCCGGTGCCCACCTCGGCATCGGGCCGCGCGCTCTACGCGGCCCCCGTGCGCCTCCTCGCGGGATTCTCCACCAGCTTCGCATTCACCGTCACCACGCTCAACCGGGGCTCCGTCGGCGGCGGGCTGGCCTTCGTCGTCGCCCCCGACGCCGCCTCCGTCGGCGACGCCGGGGCGTTCATCGGGCTCGACCCCGCCGCCGACGTCGCCGTCGAGTTCGACACGCTCATGGACCTCGAGTTCGGCGACGTCAACGGGAACCACGTCGGCGTCGATCTCGGCAGCATGGTCTCCGCCGCCGCCGCCGATCTGGGCTTGGCCGGGGTCGAGCTCACCAGCGGGCGGACCGTGTACGCCTGGATTGAATACTCGCCGGGGAAGGCCATGGATGTCTTCGTGTCCTACTCGGCCAAGCGGCCCGCGGCGCCGGTTCTGTCCACGCCCGTCGATCTGGCGGGCTATGTCAAGGAGCAGGCTTTCGTCGGGTTCTCCGCGTCCACGCAGGGGAGCACGGAGATCCACGCCATCGAGTGGTGGAGCTTCTCTACCCCGTCGCCGCCTTCCCCGGCGCCGTCCAAGCCGCCGCCGGTAGCGCCCCCTCCGGCGAGCCCCATCAACCCGACGCTTCCATCCACTCCGCAGCTCCCGGGCATCACGCCGCCGGCGACACCAGCGACGGTTTCGGCACCGCCGACCAGCTCAGTTACTGCCGCGAGCGCCCCGGCCAATTCGGTTTTTCGGAAGAATGCCAAGACGCCGCACCCGCCTGNCGTCGTTCGCGGGCTTCGCGCTCTGGGCGCTCGCGCGCCGCGCCAAGGCCAGGAAGCGGGACGCCGTGGCGGTGGCCACGAAGCGCGACAACGTGGCGTCGGCGGCGGCCATGGCGCGCTCCCCGCGGGAGTTCTCCTACAAGGAGCTCAGCGCCGCGACGCGGGGCTTCGACTCGTCCCGCGTCATCGGCAACGGCGCGTTCGGCGTCGTGTACAAGGGCATCGTCCCGGACACGGGCGCCATGGTGGCCGTGAAGCGGTGCACCAACGCCAGCGCCGACGGCGCGCAGGCGCGGGCCGAGTTCCTCTCGGAGCTCTCCATCATCGCCGGCCTCCGCCACCGCAACCTCCTCCGGCTCCAGGGCTGGTGCTACGAGAAAGGCGAGATCCTGCTGGTCTACGACTACATGCGCAACGGCAGCCTGGACCGGACCCTCTTCGACGCCGCGTCCCCGGCCCTGCCGTGGCGCCACCGCCACGAGATCCTCGCCGGCGTCGCCTCGGCGCTGGCCTACCTCCACCACGAGTGCGAGCGCCGCGTCATCCACCGGGACGTCAAGTCGAGCAACGTGATGCTGGACGAGTCGTACCGCGCGCGGCTCGGCGACTTCGGGCTGGCGCGGCAGGCGGAGCACGGCGCGTCCCCGGACGCCACGGCGGCCGCCGGCACGATGGGATACCTGGCGCCGGAGTACATGCTGACGGGCCGCGCCACGGAGGCCACCGACGTGTTCAGCTTCGGCGCGCTGGTGCTGGAGGTGGCGTCCGGGCGGCGGCCCATCGGCACCGAGGGCCGGTGCAACAACCTGGTGGAGTGGGTGTGGACCCTGCACGGCGAGGCGCGCGTGCTCGACGCCGTCGACCCGCGGCTCGGCGGCGAGTACGACGAGGGGGAGATGCGGCGGGTGCTGCTGGTCGGCCTCGCGTGCTCCAGCCCGGACCCGAACCGCCGGCCGGGGATGCGCTCCGTGGTGCAGATGCTGAGCGGCGAGGCCGACCCGCCGTTCGTGCCGGCGGCGAGGCCGTCCATGAGCTTCAGCGCCAACCACCAGCTGCTGCTCAGTCTCCAGGACAGCGTGTCCGACTACAACGCGCTGGGCCTGAACCTGTCGGACGACTCCTCGTCCGACTCGCTGAGCTCGTCGTCGCTCACCAGCACCCTTCGCAAGGGCGGCCACGACATCGGGTTCAGCAGCACCGGCGGCGACCCCCGGTGACCCCTCTTGAAATGCAAACGAGATTAGTTGAGAACTTCAAATGTATGTATTGATTGATGAGAGGGTACATTTAGATTAGCATTGGGCTGTGATAACCGTCCTAAAATATCTCTTTGTGATAATAATTCAGGTTTCAGATG
>HvleckRLK68
AGGATGAAAAAATAATAACATCGAGGAGAAGTCGCGATCTAACTAGCAGACAGAATGATGATAATTTGATTAAGATTAGTACTCTGGTAGTTAGTAATGATAACTTTGCTGATCAAGGCTTCGGAACATGATCCTTTCTTGTTCTTTCTTCTTTGTGGTGTGTCATCTTGATCTCACTCGGTTGACTTTATCTTTGTGTCTTCCTCTTGTGTCGTGTCAAAGAGGGAACAAAAACCAAAGTGTTAGTTACTTCCATCTTAAAGGTCTGCTTGGATGCTTGGTTGGCTTGATCGCACTTTCCAAAAATCGTGTAGGAGACACAGAATTGACTCCAGATGCGGCTCAAGCCTGTATCCGTCGTCTCCTTCCTCGTGTTGCTCCTCTTCCACTTCCTCGCGCGCGGTGACGGGCAGTTCATCTACAACGGCTTCGCTGGTGCGCAGCTCGACCTCGACGGCATGGCCGTGGTCGAGCCTGACGGCAAACTCGCGCTCACCAACATCACGTCCCAGCTCAAAGGCAGCGCCTTCCACCCGACGCCCCTCCGCTTCCACGAGCCGGCAACCAACGGCACCGTCGCACGGTCCTTCTCGGCCACCTTTGTGTTCGCCATTGTCACTGACTTGGTCACGGTGGGCGGGAACGGCCTCGCCTTCTTCCTCGCGCCGACCAAGAACCTGTCCATGGCGTCGCCGAGCCAGTTCCTCGGCCTCTTCAACCCCGAGAACAACGGCAACGCGAGCAACCACGTCTTCGCCGTGGAGCTTGACACCATCCTCAACCCGGAGTTTCGGGACATCAACAGTAACCACGTCGGCGTCGACGTGAACGGCCTGGCATCGGTCGTGGCCGAACCTGCAGGCTACTACGACGACGGCACCGGCGATTTCAAGAACCTGACTCTCATCGGCGGCGATGCCATGCAAGTGTGGGTGGACTACGACGGCCGATCGAAGGTGCTCAACGTGACCCTCGCGCCCGTCGAGGCGCCCAGGCCCAAAAAGCCCCTCATCTCCATCACCATCGACCTCTCGCCGGTGCTGAACGGCACGGCGTATGTCGGCCTCTCGTCGTCGACGGGGCCGTTCCGCACGCGCCACTACGTGCTGGGCTGGAGCTTCGCGCTGGACGGGGCAGCGCCGCTGCTCGACTACTCAAACCTCCCCAAGCCGGCCCGCATCGGCGACAGCAAGCGAAGGTCCAAGGCGCGCGACGTCATCCTTCCGGTGGCCACTCCGATCCTCGCGCTCGTGGTGGTCGCCGGCGTCTCCCTGCTCGTGTGGCGGCGGTTACGGTACGCGGAGCTGAGGGAGGAGTGGGAGGTGGAGTTCGGACCGCATCGGTTCGCGTACAAGGATCTCTACCGCGCCACCGGCGGTTTCGACGGCGAGCAACTTCTCGGTGTGGGCGGGTTCGGGAGGGTGTACAAGGGCGTGCTCCGGGTGTCCAAGAAGGAAGTGGCCGTGAAGATCCTCATGTCGCACGACGGCGCGAAGCAGGGGATGAAGCAGTTCGTAGCCGAGGTTGTCAGCCTCGGCCGCCTCCGGCACCGCAACATCGTGCAGCTGCTCGGCTACTGCCGGCGCAAAGGAGAGCTTCTCCTGGTTTACGAATACATGCCCAACGGCAGCCTGGACAATTGGCTGTACGACCGGAACGCGCCGCCGCTGAGCTGGGCGCAGAGGCTCAGCGCCATTAGAGGCGTTGCGTCCGGCTTGCTCTACCTCCACGAGGATTGGGAGAAAGTGGTGGTGCACCGGGACATCAAGGCGAGCAACGTGCTCCTGGACGGCGACATGAACGCGCGGCTCGGCGACTTCGGCCTGGCCAAGCTGTACGACCGAGGCACCGATCCGCAGACTACGAGCGTGGTGGGCACCATGGGTTACCTCGCGCCGGAGCTGGCGTGCACGCGGCGGGTAACGCCGGCCACGGACGTGTTTGCGTTCGGTTCGTTCGTGCTGGAGGTGGCCTGCGGCCGGCGACCCATCGAGCACGGCACGGTCGACGACAACCGGCTGGTGCTCGCGGACTGGGTGCTCGAGCGCTGGCACAACGGAGACGTCACGGACACGGCGGACCCGCGGCTCTGCGGCACCTACGATGTCGAGGAGGCCGCGGCGGTGCTCAGGCTGGGCCTGGTGTGCTCCCACCCGACGCCCGCCGCGAGGCCGTCGATACGGCAGGTGGTGCAGTACCTCGACGGCGACATGCCGATGCCCGAGCCAGCGCCGACGTATCGGAGCTTCACCGCGAGGGCCTCGATGCACAACGCCGAGGGCAACGAGTCCTACGTTGCTTCATACCCGTTGTCTTCGGCGACTAGCGTCGGCGCATCCTCTGTCCTCTCCGGGAGGTGACGAAGGGCCACACATCACGTCTCCTGATAATTGAGATAGTAAAGTGCTCATACAAACGCATTGCACGGTTCCATCCAACCCGTCTGGTCATAGTGGAGTAACTAAGATAGTATTACGTATTTGGTACTAGTAAACATGCTGATATGACACACAATTAAAAAAGAAAAATGATTAGAGTAACATAGATAGATACCATAACATGTTAAATGTTATGCTACTATGTGTCAATGCATGTCAATAAATAAGATCATCTATGATACTTCTACTACATTAGGCTCGTTATAGTGCAGAGTATCATATAGTAGCATCATGAATATGATACTATTGTACGATACTACCTTCATAATGCATAATATCATAAACTAGTATCATAGATGACATCATTTATTAACATGCATGACACATAGTACCAAAGAATTTAACATGTTATGGTATCTACCTGTGTTACTCTAACCATCTCTTTCTTCTTTAATTATCTGTCACATCAGCATGTTTGCTAGTCTCAAGTATATGATATCACCTAAGTTATTCCCACTTTGGCCAACCTTATGATACTATGCACTATGAAGGTAGTATCATACAATAGTATCATATGCATGATACTATTATATGATACTCCCCACTATGACCAGCCTAAGTCGAAGGGCCGACAGTACCCAAGATAGACAGCATGATTGCTAACGGATTTTAGAGTTAATTGCATGAGTTAAACATCATAATGAATTGGTATCAGTTGTCAATTTTTACGTATCAATACCAATTCTAAGTCTAATGTTAGAGTTGTGTCGAATATTGTGTACAAGGTAGGTTACAATTGGACTTGTAGTTGTATTGTGTTTAGATAGGATATGTAGTCGTGTCCAAGCAGGACACTTGTATCCTAGGCCTCTCATATATAGCGGAGCTAGACACACGATGTAACATATGCAAACATAATAGCACAGGTGTGCAGGGCGAGCCGACGGCGTGTGCCGGGGCCCAAGGCGGCGAGGGTGCGGTATTGTGACGGTGTCACGGGAAGGAAAGCCCGTAGTCATGCCCCGGGGATGTAGCCATATCGGTGAACTTCGTTAACAAATCTCGGTGTCGGGACCCCGATCCTAAGCCATATGAATCCAGTCTGTAACACATCGCATCTCTTTGCGGTCTCACGCACGGTTATCCCCATGGTTGTAGCCTTACCTTAGCCGGAACCGTTTGCGCCTTTTGACTCGCGTATGCAAATGTGTCG
>HvleckRLK69
AAATTTATTTTGCGGGAGGACTTGTATCATATTCAGGCGATCGTCAAACAACAAATGTAACAGAGTGGCATATTGCACTGTTTTCCGTCACGATGGACTCGTCAGGTAGGAAGGACCGCGTCGCTTAGACCTCAGTTGATTATTTCCAGTCCGAAAATTTCAGAAGGAAAAATTTGACGAAATTTAGTGCGAAATAGATGTGCATCAGCATCACATTGCAGTCACGTACTCACACCCACTTGCCAGCCAAGTCGCCATGGCTCGCAGGTCGCTCTCATGGTGTCCATCCTTCCCTGCTAGCTAGGTACAGTACAAATGGTAAGTTCCTTGTAGCCTACAGTAACCAAGGTTAAACTAAACTTTATGCAACATCGAGTATTAATAAGTACACCTAATCCTTGTGTGTGTGTGTGTGTGTGTGTGTGTGTTTGAAGATTCCTAATCCTTGTGTTGCTTCTGAGTTGTGACTTGTGTACAAGTGTGCGGTGAAGGTTGAGGTGACCACTGACCAGGCGGCAAGCGTGCAGCGCGAGGGCACCATGCTTCCCAGGAAGTTGTTGTTGTTGCTGCTTGTGGCAGTGGGTGTCGAGGCCGGCGTCGAGTTCGCCTACGAGGGCTTCCCCGGCGCTGGGCTGGCGCTCGATGGCATAGCAAGCGTCACGCCGGACGGGCTGCTGCTGCTCACCAACGACACCGACTTGAACGTAGCCCACGCCTTCCACCCGGCCCCGGTCAGGTTCCACCGGACGTCCTCCTTCTCGACCACTTTCGTGTTTGCCATCGTGTCGGAGCTCGTCGACCTGAGCACCAGCGGGTTCGCGTTCCTGGTCGCGCCGAGCAGCAGGGACCTGTCTTCGACGATGGCGGCGCAGTACCTGGGACTGTTCAACGCCAGCGACAACGGCGACCCGAGGAACCGCGTCTTGGCCGTCGAGCTGGACACCGTGCGCAACCCGGAGTTCGCGGACATGAACGACAACCACGTCGGCGTCGACGTCAACAGCCTCAACTCCTCGGCGGCTGCCATGGCAGGCTACTACGACGACGCCACCGGCGCATTCCGGAACCTTAGCCTGGCAAGCCGGGAGCCCATGCAGGTGTGGGTGGACTACGACGCTGCCGCGACGGAGATCACCGTGGCCTTGGCTCCGGCGCGGTCTCCCCGGCCCAGGAGGCCGCTCCTGACCACAAGGATAGACCTCTCAACGGTCGTCGCCGACACGGCGTACGTCGGCTTCTCGTCGGGGTCCAGCATCGTGCTGTGCAAGCACTACGTGCTCGGCTGGAGCTTCAGCCTGGACGGCGCAGCTCCAGCGCTCGACCACGCCAAGCTGCCGACCCTACCCCGCATTGGCCCCAAGCCCCAGTCGAAGACGCTCGCCATCGCGCTGCCGATCGTCACCACGGCGGCCGTCCTCGCGGCGGTCGGCGTCGGCCTCTTGTTGCTCCGCCGGCGGCTCAGGTACGCGGAGCTGCGCGAAGATTGGGAGGTGGAGTTCGGGCCGCAGCGGTTCGCGTTAAAGGACCTGTACGACGCCACCGCCGGGTTCAAGGACAAGCGGCTGCTCGGCGCCGGAGGGTTCGGGAGCGTGTACAGGGGCGTGCTCCCGGGGTCACGGGCCGAGGTGGCCGTGAAGAGGGTGTCACACGAGTCGAGGCAGGGGATGAGGGAGTTCATCGCGGAGGTGGTAAGCATCGGCCGGCTCCGGCACCGCAACCTCGTACAGCTGCTCGGCTACTGCCGGCGCAGAGGGGAGCTGTTACTGGTATACGATTACATGCCAAATAGCAGCCTCGACAAACACCTGCACGGGCAAGGGCAAGGGCACGGCCACGCTCTGGGCTGGGCGCAGAGGCTCCGGATCATCAGAGGCGTCGCATCAGGGCTGGTGTACATGCACGAGGACTGGGAGCAGGTCGTCATCCACCGGGACATCAAGGCCAGCAACGTGCTCCTGGACGGCGAGATGAACGGGCGGCTCGGCGACTTCGGCCTCGCGAGATTGTACGATCATGGCGCGGACCCGCAGACCACGCATGTGGTGGGCACCATGGGGTACCTAGCGCCGGAGCTGGTGCGCACCGGCAAGGCGACGACCCTCTCCGACGTGTTCGCCTTCGGGGCGTTCCTCCTGGAGGTCGCCTGCGGTAGGAGGCCCATCGAGATCGAGGAGGGGAAGGAGGACGTCGACGGCTTCGTGCTGGCGGACTGGGTACTGGGGCACTGGCGGAATGGCGCCATTACCCGCGCGGTGGACGCGAAGCTAGGCACAGGGTATGACGCCGGAGAGGCGGACACCGTGCTGCGGCTGGGGCTGACGTGCCTGCACCCGTCGCCCGCGGCGCGCCCGAGCATGAAACAGGTGACGCAGTACCTCGACGGCAGCGCGCCGTTGCCAGAGCTTCCCCCGACGTACGTGACGGTCAACATGCTTGCCGCCATGGAGGCGCACCAGGGCGTCCTTGGCACGTGGGCGGTCTGGCGGTCGGCGTCGAGCGTCGCCACCATGTCTGACATTGGCCTCTCCGGCCGATGACAGAGGCAAGCTGATCAACACGTTACTAGGAAGACTGGTCTGATGAATGTATGTTTGGATCGCTGTGATGCTTAGATCTGAATTGACAACTGGACATATATGAGATTTCTACAGTTTTAGTTAACATATGAAGTATAGGATTTTCCTGGAATAGTAGAGGGGTTAAAACTTAAAAGAAGAATCATGAGTTCACTCTCACTCAGGATGTCAACTTTGTCAAGATTGGAGTTTGGATTTCTTTACACGAGAGCAGTCTGAAATCTCAACTTGGACCTTTCAGCTTTCACACTTTTCGTAGCATCGTTCTGTACATGGGAGCTCCGCGAGCCAGGACATGGCGCTCCCAGTCGGACACCACGCCAAATGGGTTCTCCATCCGGCAATTGCCGCTGTCGTCGCTGTCCACCACGAGCTGGCCCTTGCCGTGCGAGATGAACTGCTCTTTCATTCCAAGCAGGACAGACTCCACGTCAGACTGTAAATAGATCTGCAACAGCAAGTTTATGGTTCAGTAACAGCTTCTTCTTTTCCTTTTTCTTCCCCAAACTACAACCAAGTGTTCTCCATCTGACNTCTGACTGAGCTTGATGCCATAATTACACAAACACACGTGCATGCGAGATGCTATTGAGGTGTCCTGCTAGATTGGTTGCTGTCCTGTGTTGGTTATCATATCCATACTGTGTTCTACTAGTTCTGAATAACTAGATTGGCTACCATCTGCTTACATGCTACGGCAGATGTGTAACCATGCTCAACATCTGAAATGGGGAAGTGGGGGCCACAGANNNNNNNNNNNNNNNNNNNNNNNNNNNNNNNNNNNNNNNNNNNNNNNNNNNNNNNNNNNNNNNNNNNNNNNNNNNNNNNNNNNNNNNNNNNNNNNNNNNNNNNNNNNNNNNNNNNNNNNNNNNNNNNNNNNNNNNNNNNNNNNNNNNNNNNNNNNNNNNNNNNNNNNNNNNNNNNNNNNNNNNNNNNNNNNNNNNNNNNNNNNNNNNNNNNNNNNNNNNNNNNNNNNNNNNNNNNNNNNNNNNNNNNNNNNNNNNNNNNNNNNNNNNNNNNNNNNNNNNNNNNNNNNNNNNNNNNNNNNNNNNNNNNNNNNNNNNNNNNNNNNNNNNNNNNNNNNNNNNNGGAAGTGGGGGCCACAGAGTATACCTTTCCATTGACCTGAAGAAGGTCGGCAACAGCTTCAACAAGCATTCTTCTTACCATTCTCCACCTATTTTGCTCTTTGTTGAAGTCAGGATTTGGGCACTGCAAAAAGAGACCACGACTTAAACAAGGCAGGTCATCCACTAGGTAGTGTAGCATCCATTGAGATACACACACACACAAAAAACAGTATGATGAAGCACTAGAGAGTTAACAATACCTGTATTGCGACAAGTGTCAACTGTCCAGGATAACTTGAAACTATCGAGCGAAATGTGGAAGTTGCATTTGTTGATAGAAAATATCTGCCCCCCCCTNNNNNNNNNNNNNNNNNNNNNNNNNNNNNNNNNNNNNNNNNNNNNNNNNNNNNNNNNNNNNNNNNNNNNNNNNNNNNNNNNNNNNNNNNNNNNNNNNNNNNNNNNNNNNNNNNNNNNNNNNNNNNNNNNNNNNNNNNNNNNNNNNNNNNNNNNNNNNNNNNNNNNNNNNNNNNNNNNNNNNNNNNNNNNNNNNNNNNNNNNNNNNNNNNNNNNNNNNNNNNNNNNNNNNNNNNNNNNNNNNNNNNNNNNNNNNNNNNNNNNNNNNNNNNNNNNNNNNNNNNNNNNNNNNNNNNNNNNNNNNNNNNNNNNNNNNNNNNNNNNNCCCCCCCCCCCCCCAAAAAAAAAAAAATGCCATCACTAATGATGAAATAGGAGCCAAAAATAAAGAGGAAAAAGAGCTACACGAATAAAAAAAATTCATAAAATGGTTGGAATAGTTAAAACAGTTATTAGAAGAACTTCCATGTGAGGACTGAGGACTACTAAATGACAAGCAAAAGCATATCCTTGTTGATTACTAGGCGTGACAACTGAACTTGAATACTCAATACAGCAACAATTTTCCCTAAAATTTAACAGTAGTTCTCACGACATTTTTAACGTGGATTATGTAATCCACCATCTGTTGTGAAATCTGGATCTTTGTTCTGGCATACAACAAAGCAAGACATGTTGTATGAAAAAATCTAGCTCCAATGAATGTATGTTTAGATCCTAGAATAAAATGAGATTTCTGAAACATTGTTTAAGGTTAAGCCGATTTCACTGTCATCTCATCAAATAAAATGTCCAATGGGTCATTAGTTCCCTAAGAATAGATAACTGCTCTGGTTCCCAGTCAGATTATCACACTTGGAAAAATTCACCATCTTACATGAATTGACAAGTTTAAGTCCAATCTGCATGCATTGACAAGTTTAGTCAAACTAGTTATCCAGAATACCCACATTAGAAAAAAGAATGATTCAAGTCAAGGTGGACAGAGTCGCACAAACAAGGTTACTTTGTTCTTTGTTGGAGTAATTTTATGAGCAAACTAGTTATTGGAAGTGACATCACTGGCATGAACAAGAAAGGGTGAGGCAAAGGAAAAGAATAAGTAGTAATATAAAGTAGATGTACAGGCTGCTTACAAGTTTCTTTTCCCAGCTGATGCTACATCCTTAAGGCACCTAACAACAAGCTACAGCTAAAACAAGTTACAAAAAGGTTGAAGCACTAAATTCAATAAATGATACAGGCAGTTTTTACCTTTTCATTCATCTCAAGCCCAAGAAAATTGGAGCCTTCCCAGTTTCTAGCCATTTGGAATAGAAACAAACCATTTCCTGCACTAAGAAATATACATACTTGAGAAGGCCTCAGAATTCGAGAAAATACACAAACTATGAAGAAATTAAGAAATGTTCTATATCTTGGTAGTTTACGTGAGCATACATTTGCGAACATGCACTTTGACGAAGCACAAAGCAAACTAATAATAATTAAATTGAATGAACTAGTTTTTTGTGATGACTACAGAAGAGAAACTGACAATCAAATCTTCTGAAGAAAGCCATATATGCACAAGAAACAGCAATGGCGGTATGTGACCTGTAAAGATTGCAATACTTCAATGTACTAGACAGTTTCACAGATGGAACCAGTAAGAGCAGCCACGTTAAGGTTTCTTATCACAAAGCTGCTTTGATGTTGGCAGCCATAAACTAGTGTGACGAACCACAGCTATAGAAAAAGGATCGGTCGTCTCCATCTGTGTCCATCATGCAACAAAAAATGATTTGAGATTAAATATTCTAGGAGGGAGGCCTACCACTTCCTATATCAACAAACAATGGTTGTTCGGTGTCAGAGAAGACGTCATCCCATGGAATCTGATAGGGATAGCTCTGCAAAGGAGAAAAAAATGAAAAAAAAAAATTGTAGACCACTAGAGAAAGGTAACTTTACAGTGTTCCAGTTTAAAAAACTATAGCGTCGGTAGTAGTTAAGAAATGTTGACCTTCATTTGACTGAAGCATTCAATAAGGACAACAGAATTACCATGCAAACTTAGGTGCATGTCAATATGCCATCAAATGCAACAAAAATCGAATAGAAGAGAATGCCTCTGACACTGACAGATCTCATCCATATACGAACAGAATACATCAATGGGCGATGATTATTTCTGCTACCAAATATATTTATCAACACATTTGTTAAAATTGTTGCAACAATGAGCTAGTTAAATGATGCTAAGAAGCGATAAGCATGTGCTACTACATAGTAAGGTCCATGTTACAAGTCCTTGAGCTGCTAAAAATTCTCAAGCGAAAATCCCCAGTTACTTATTTTCCCCACAGATCCCTATTTCTTAGGTGAATATTCATCATTTCTTATACAACTATATGTTGTTCAATTTTTTTAAAAGGAATAAATAAGATTTTGATTTTTAATCCCTTTCTATAATGTACTACTCCATCTGTACCACAATACTTGTTGGAGAGAACTAGTCTAGTTTTCCCCAAAACAAGTATTTAGGAACAGAGGGAGTATTAAAGAGTAAAGTGGTCTAGAAGTTTACAAGATCAAGACTTAGCTTTACATAACAGAAAAATGACCATGTAAATTGTCAAACATTGGAATGTGCTCTTAACTAATTTCGAAACAGGGAACGCTCTCAATTTTTTCATAGATGTAACTTGAAGATACTGTTATATTTACAACGTTAAATCCAGAAAAATGACCATGTAAATTGTCAATCATTGGAATGTGCTCTTGACTAATTTCGAAACAGGGAACTCTCTCAATTTTTTCATAGATGTAACTTGAAGATACTGTTACATTTACAACGTTAAATCCAAAGAAGAACCACTTCAAAATGAGGCTTAATTGTATAGGTATGCACATATATGTTGGTATGCTGGGGCGTCAGGATATCAGGCTACACTTTTTGTTTTAAAATATTGAGGACTTGAGGCAAGAGTTGTTTCATGCATGATGCATTGATTGTATAGGCACAATCATGTGTGCTCGCGATGAGAATCATGCTACAACTTTTTATCTTGATAAAATTTTGAGTGCACTCATGGACAGAGTAACAGAAATAGTAATTCTAGAGCATGACTTACTTTATCCAATGCTGCAATACCAGGCAATATTCTTCCTTTGAGAAATTCCCATACAACAGATTCATTTTCAAATGCTGTATATTGTGATGAAGAATCTGATATTCCTTTTACTGCCTTGCATGCTGCACTCCCTACTATAATAACGTCACAGCTATTATGACTTGCTTTGTTCAGTATCTGACCCAACTGCGTTGCCCCGACAGAAAATTCTTCTGTCAAGTCATAGCTTGTAGTAGTACCGATCCATAGGATCTTCTGTAAGATATAAATAAAAGAATGTGAGAACTTGCCGGGATAAAAGGATTTCCCTAAGAATTAAGGCATAAGTTGATAACCGAAAAAACAGAACTCTGATCATATGTCATATTACTATCTGTAATGCGTTATTCTTGTGACCTGTCAGATTTTCAAGCCAACTTTGTGGAGCTCTGGGATATGTTTTGCGGCTTGATTCTTGTCAAGATGGTGCTCATGGCATAGCCAATCACCTGCTATTTTTGTGCTCGTCATGCACAAAAGCGCCCAACAAAGAAGGGGGGGGGAGTCCAACAGGCCATGGCCCGCCCAACCCAGCAGAAAACAGTGAAAAATGAGACTAAAGCTAGGCCTTAAGAACAAAATTTATGTGCTATTCTTTGGGCTAACCCACCCTGGCCCGCCCAACAATCTTGCTAAAGCTTTGCCGCTAGGGGGGATGTCAGGTAGTGTTTTTGTTGTTGCAATTTTCCAAACTAAAATAGTGCATTCCTATAACAGAAAAATGAAAAACTGCAATACATTTTTCGAGAAAACGCAGAGATGTGCGTTTCTTTGTATTGAAAAGAGGGGAAGTCAGTCTCTGAGGAGACGATTACAGCGGGTTACAAGTAGTTCAATGGACATCCCAGGATGGGAAAAACTGCAATACATGCTAAAAATAATGTAAGACGTTTTAAACATTTCAGTTAAAAATATTTCTATGCACTACACAGAGCCTCATCACATTCATACCAACGTCGTTTCTAACCTTGCATGATAATAGTAAAGAAGAAATTCTCTCCAATGTTGATGGCCCTATATCAACTGGTGTCCAGCCCAAAGATATTAAGCCTGGAAGATACATGGACATCAGAAAGCTATATTATTGTTTCAACCATCTACTGGATACCGAAGTCACCCTTTCAAGCAATTTTGAGAAATAACTACAGCGCGGCAAAAAATGCTAGAAATTAACAAATACTTCCTCCGTCCCAAAATTCTTGTCTTAGGTTTGTCTAGAAATGGATGTATCAAAATATTAAAACGTGACTAGATACATTCATATCTACACAAATCTAAGACAAGAATTTTGGGACGGAGGGAGTAAGATATAACAAGCAATAATAGACGACGGAACCATGAGCATGCATCATCATCTATCAAATCAGGTGAAGTGTCAACTGTGTAGCTTTACAGGTTTGTAAATGCAGGGTAATTTCAGCGGCTGATTTGTTTTTTGACCAGGAAATTGTTAGTGAGGCCTTGACGGTAAATTTTAATAATAAGGACACAACTGTACAAGTATTTACAGGAGAAAAGAAGAGGGTGCGGGGAGGGGGAGGGGGGGGGTAAGGGATGGAATTTAGCCAAGAGAGAAAAGGACCAGCTCGTTCAGTGGAGAATCTTAAGGTGAGGGAGGTACATCCTTTCATAAAAAAAAGCCAGAAACTAATGCAAGGGTTCCCATTTCTTTGCTTCCAAAATGCATCAGGCAGCCATGATGAAGACATCCCTGAAGAAAGGCTTGGCAAAAGCAGTTCTTGCAGAAGTGAGGACTGCAGTCATACCACAGCTGATGCTAGGGCGAATACAAATTCTGGCTAACAGTTTGTAGTGAAAGGGCAGGTTAAGAAGAGGTAACCTCGAGTTTCAAGAGGCCCATTTGCAGAGGATACATCAGTAGCCTCATCCATGTAAATAATTCTCTAAGAAAAATATCCATTGTGTTAACTCTGTGTTTGCAGTCCTCCCCGTGCATTTGGACTCGACGAGTGCGAAGGGCAAGAAAGCTAGCCGAGCCTAGGAGGATCCTCTTAGGTAGCTGGAACGTAGGGTCTCTGACAGATAAGCTTCGGGAGGTAGCTGATACAACGGTGAGGAGAGGTGTTGATATCCTTTGCGTCCAAGAGACCAAATGGAGGGGACAGAATGCGAAGGAGCTGGAGGGTACCGGCTTCAATCTATGGTACACGGGGACGGCTGCAAACAGAAATGGAGTAGGCATCTTGATCAACAAGAGCCTCAAGTATGGAGTGGTAGACGTCAAGAGACGTGGGGACCAGATTATCCTGGTCAAGCTAGTAGTTGGAGATTTAGTTCTCAACATTATCAACACGTATGCCCCGCAAGTAGGCCATAGTGAGGACACCAAGAGGGAATTCTAGGAAGGCCTGGAGGATATAGTTAGGAGAGTACCCACTGGTGAGAGGCTCTTCATAGGAGGAGATCTCAATGGCCACGTGAGCACATCTAACACAGGTTTTGAAGGGGTGCATGGGGGCTTTGGATATGGCATCAAGAACCAAGGAGAAGATGCCTTAAGCTTTGCGCTAGCCTACGGCATGATCGTAGCTAACACCCTCTTTAAGAAGATAGAATCACATCTAGTGACTTTTAGTAGTGTTCAACACTCTAGCCAGATTGGTTTCATCCTCTCGAGAAGACAAGACAGGCGTGCGTGCTTAGATTATAAGGTGATGTCTGGAGAGAGTGTTGTCCCTCAGCATAAGCTTGTGGTTGTTGACTTCAACTTTCGCATTCGTGTCCGGCGGGACAACCATGCCAAAGTCGCTAGAACAAAGTGGTGGAAGCTCAAGAGGGAGGTAACTCAGGTGTTCAAGGAGAGGGTTATTAAGGAGGGGCCTTGGGAGAAAGGAGGGGATGCAAACAACATGTGGATGAAGATGGCGACTTGCATTCGTAAGGTGGCTTAGAGGAGTTTGGAGCGTCCAGCGGAAGTAAAGATACCTGGTGGTGGAACGATGATGTCCATAAGGCAATTAAGGAGAAGAAAGATTGTATCAGACGCCTATCCCTAGATAGGAGCGTGGTCAACATGGAGAAGTACAAGATGGCAAACAAGGCCGCAAAGCAAGCTGTGAGTGAAGCAAGGGGTCGGGCGTATGAGGACCTCTACCAACGGTTAGACACGAAGGAAGGTGAAAGGGACATTTATAAGTTGGCCAAGATCCAAGAGAGGAAGACGAGGGATGTTGACCAAATTAAATGCATCAAGGACGGGGCAGATCAGCTCCTGGTGAAGAACGAGGAGATTAAGCATAGATGACGGGAGCGCTTTGACAAGTTGTTCACTAGGGAGAGTGAGAGCTCTACCACTGAACTGAACGACTCCTTTGATGACACTAGCAGGCGTTTTGTGCGGCGAATCCAGGAGTCGGAGGTCAAGGAGGCTTTAAAAAGGATGAAAGGAGGCAAGGCAATGGGCCCTGATTGTATCCCCATTGAGGTGTGGAGAGGCCTCGGGGATATAGCGATAGTATGGCTAACCAAGCTTTTCAACCCCATTTTCCGAGCAAACAAGATGCGAGAAGAGTTGAGATGGAGTGTATTAGTACCAATCTTCAAGAACAAGGGGGATGTTCAGAGTTGTACTAATTACCGTGGAATTAAGCTGATGAGCCATACAATGAAGTTATGGGAGAGAGTCATTGAGCACCGCTTAAGAATAATGACAAGCGTGACCAAAAATCAGTTTGCTTTCATGCCTGGGAGGTCGACCATGGAAGCCATTTTCTTGGTATGACAACTCATGGAGAGATACAGGGAGCAAAAGAAGGACCTGCATATGGTGTTCATTGACTTGGAGAAGGCCTATGATAAGATACCACGGTATGTTATGTGGTGGGTCTTGGAGAAACACAAAGTCCCAACAAAGTACATTACCGTCATCAAGGACATATATGATAATGTTGTGGCAAGTGGTCGAATAAGTGATGGCGACACTGATGACTTCCTGATTAAAATAGGACTGCATCAGGGGTCAGCTTTAAGCCTTTATCCTTTTGTCTTGGTGATGGATAAGGTCACAAGGGATATACAAGGAGATATCCCAGGAGACGGAGGTCAAGGAGGCTTTAAAAAGGATGAAAGGAGGCAAGGCAATGGGCCCTGATTGTATCCCCATTGAGGTGTGGAGAGGCCTACAGGATATAGCGATAGTATGGCTAACCAAGCTTTTCAACCTCATTTTTCGAGCAAACAAGATGCGAGAAGAATTGAGACGGAGTATATTAGTATCAATCTTCAAGAACAAGGGGATGTTCAGAGTTGTACTAATTACCGTGGAATTAAGCTGATGAGCCATACAATGAAGTTATGGGAGAGAGTCATTAAGCACCGCTTAAGAATAATGACAAGCGTAACCAAAAATCAGTTTGGTTTCATGCCTGGGAGGTCAAGCATGAAAGCCATTTTCTACAGGGAGCAAAAGGACATGCATATTGTGTTCATTGACTTGGAGAAGGCCTATGATAAGATACCGCGGTATGTCATGTGGTGGGTCTTGGAGAACCACAAAGTCCCAAAAAAGTACATTATCGTTGTATAGGAGACGGTACTACCTCTTATGAGCGCTAGTACCGCTCCTGGCAGCGGTAGTACCGCTCCGGCCGTACTACTGGCCCCTGCCTTCCTCTTTGGTTGCTGCCCTCTGCCCCAGCGGTAGTACCGCTCCTCTCTGGAGCGGTACTACCTCTTATCATCGGTAGTATCGCTCCCTGGAGCGGTAGTACCGCTCTGATACGGGCTGAGCAAGTGGGTAACGGTTGGATTCGTTCCCCCACTATATAAAGGGGTTCTTCTTCCCTGAGAACTTCACTTTTTCCAACCCTAAGCTCCATTGTTGCTCCAAGCTCCATTTTCGCCCAATCTCTCTCCCTAGCCCACAAAACTTGTTGATTCTCTAGGGTTTGCTTGAGAGGGCCTTGATCTACATTTCCACCAAGAGAAATTTGATTCCCCCCACCAATCCCTCACAGATCTTGTTACTCTTGGATGTTTGAGCACCCTAGACGGTTAAGGTCACCTCGAAGCCATATTCCATTGTGGTGAAGCTTCGTGCTCTCGTTGGGAGCCTCCAATTCAGTTGTGGAGATTGCCCCAACCTTGTTTGTAAGATTCGGTCGCCGCCTTCAAGGGCACCACTAGTGGAATCACGACACCTTGCATTATGTGAGGGCGTGAGGAGAATACGGTGGCCTTAGTGGCATCTCGGGGAGCATTGTGCCTCCAGACCTCTCCAACGGAACGTACTTCCCCTCCAAGGGAAGGAACTTCGGAAACACATCCTCGCCTTCATCGGTTCCACTTGTGGTTACTTCTTACCTTTACTTGTATTTGCTACTTACTTGTTATTATTGTGGCTAGCATCATATAGGTTGCTCACTTAGTTGCATATCTAGACAACNCAGGATTTTGGTGTTTCTGTCACTACACCGACTCTGCTCTTATCTGACAGTACAGGTGCTATTAGCATTGCGCGCGACCCTGTGAAGCATGAGCTCACCAAGCATATTGGCGTTGATGCTTTCTATGTGAGCGGTGCTGTGCATGATCAGGTTATTGCTCTTCAGTATGTGCCTTCTGAGTTACAGTTGGCGGATTTCCTGACGAAGGCCCAGACTAGAGCACAACATGGCTTTTATCTCTCCGTTGTCAGTGCGCAACACGCGCAGTTTGCGGCCGCTCTCCGCCTCCACAGCAACCTGCGCACGCCTGATGGCGTCCGGCGCCTCTCCCTTACTGCCGAGGACCATCACCCACATGTAGTGAGAGAGGTCGTCGACGAGCAGCAGGAAGTAGCGTCGACCTCCTGGTGTGGCTGGCGTCACCGGGCCGCATAGATCTCCGTGCACGAGCTCCAGCCTCTCCTTGGCCCGAAAACTCGCCTGCTGGGGAAAGGGGAGTCGTTTCTGCTTCGTCAGCACACAAATGTCGCAGAACTGCTCCACATGGTCGAGGCATGGTAGGCCTCGCACCATCTCCTTGGCACTTAGACGCTTCAGGGCCTCAAAATGAAGGTGCCCAAAGCGCTCATGCCATTGCCACGCCTCGTCGTCCCGACGGACAGCGAGACAGACCGGTTGTGCCACCTGCACATCACGGACATAGAGTCGATTTCCGCCTCTGGGTACCTTGGCGAGAAGGCGACGCTGGCGATCCCAGATGCGTAGGACCCCATGCTCAATCAGCACGCGTGAGCCATTCTCATCCAGCTGTCCCAAGCTGATGATGGAGTTCCTTAGCGCGGGGATGTAGTAGACACCGGTGAGCAGCCGGTGCTCTCCCGTCTTGGTGGTGAAGATGACGGAGCCGACGCCCTTAATTTCCACAGCTGAGGCATCCCCAAACTTGACGGAGCCTCGCGCGTCGGAGTCGAGCTCGGCGAAGAATTCCCTTCGACCGGTCATGTGGTGGATGGCGCCGGTATCGAGGCACCACCCCGCAGTCTTGTCCTTCCCGGAGCCATCGCCGAGAAGAGCGTGTGCTTTTGGCTCGTCGAGGTGGAGGGGAGCCTTTGCGACTGGTGTCGCTGAAGGTAGCTCGATGCTTGCATGCGCCATGAACAGAGCCGTCTCCTCCTCCACCGCCTGTGCGACGTGAGCCTGGCCTTGTCGTGGTTGGCGACACTCATTGGCCCAATGGCCAAGCCGGCCACAGTTGTGGCAGCTGTTGTCCTGTGCCGGCTTGGGCTTGCCAGCGACGCCGTCCTTGGCGCCTCCGCGGGCGTCACCTTCGGCACGTCCTTGTGCCTTGCCGCCCCTTCGCGCCTTGCGCTGCTTGCCGCGCTTGCGGCCGCCCGTCGTGGAAGAAGGCTCCCCCTTCTTCTTGTCACCAAGGCTGGCATCCCACTGCTCCCGAGTTAGGAGCAGCTTCCCGCCGGTGGTGATGGGCCCCGAGGGAGGCTGTGGCTCGTCGGTGTCGACGACCTTGAGGCGACCTATCGCCTCCTCGATCGTCATCGTGGAGAGGTCCAGCAAAGACTCGATCGAGCGAGCCATCTGCTTGTACTTCTCGGGAATGCACCGGAAAAGCGGAAAAGCTTCTCGACAGCTCTCTCCTCGGTGTAGGTGGCATCGCCGAACTTCACCATCTTCTGCAGTAGAGTGTTGAGACGGAGAGCAAAGTGATCAACGTCCTCACCTGGCTTGAAAGCCAGGCTCTCCCACTCCTTACGAAGTGCCTGCAGTGTGGACTTGCGAGCACGGTCGCTGCCGATGCGTGCCGCGGCGATGGCGTCCCAAGCCTCCTTGGCAGTCCGCTTGTTGGAAAGCGAGAACTGCATCTCGGGCGGGACTGCGGCAATGAGGGCGTCCAGCGCCCGTCGATCTTCTTGGTGGTCGACGTTGCTGTCCTAGACTGCCTCCCACAGCCGCCGCACCTGGAGCCTGATCTTCATGATCGCGGCCCACTCGACGTAGTTGGTTTTAGTGAGGGTAGGCCACCCAACACTGGGACCAACATCCCTGACCACAGTCCGGACCTCGTAGAGGCCGTGGTCCTGGTCGTTGCAGCCGCCGTCGCCGTGCGCACCTCCACCTGGAGCGCGGGCGTGCTCGGCTGCCCACTGCGCTGTCCGCTCTTGCACCACTTTGGCACGGTCTGCGTCGGCACCGTCGTCCGCAGGCGCGGAGCCGTTGGAGCTGCCGGAGCCGACGCGGAGTGCCTTGGCACCCGCTGTAGCCTCACGTGCTGCCTCCGCTGCTGCTGCTGCTTCTACCTCCGCCCTGGCTGCTTCTACCTCCGCTCTGGCTGCTGCCAGCTCCGCTGCAGCCAGCCTTGACACCCTTGCTGCCGCAGCAGCTGCTGCTACAGCTGCTCGCTCACGCTCCTCTGCCACGGCGCGCTCGGCCTCCTGCCGGCGCCGTATGCTCGAGGTAGCCATGTGCTGAGAGCGACCTGTAGACATGGCTCGCTGCAGGGGGGCTGTTGCGTGAAGAGGATGCTGTTGCTGACGAGCTGCTGCTCAACAGTCCGGAGGGAGGGAGGTAACCAGGGGCAGTCGGAGCAGCTGCTGCTACCGGCTTAGGCTGCTCAGCTCCCGGTGAGAGAGGTGAGCAGGAAATGCTCAGGGTACAAGATAACCTGGCTCTGATACCACTTGTTAGACCTTTCAGCCTGAGCATTGATAGTTGTGGATGACACTAGGAGAGTTGGGACAATTTTCGTTGGTTTATTTCTCACACAATGCCATGCCAACCTGAGGGGTTGGGGATACATATTTATAGGCTGCTAGCCAGCCAAGCATATGCTAAGATGCTAGTCTAAGATGCTAGTCTAAGATGCTGCTAAGATGCTAGTCCAAGATGCTATCCTAACTGCCAGTCCTTGATGGTCAAGGATTCTATCCTACCAGCCACAAGGACCATGTGCTGCAGCCCCACAAAGGACCATGTGCTGCAGCCCCACAAAGACCTTAGTACAGAGACATCCATCATTCTCCCCCTAAATCTTGTGCGTCGTCTTGTGGGAGAGTCGAATCATCCATATCCTGGAGCAGAGTTCGAGGAACTTGATCCTCCCAAGAGGATTGGTGAGCAGGTCTGCGAGCTGGTCCGTGGTGTTGATGTAGCTCGCCTCGATGCTCTCTTCATCCAAACAACTTCGGATGAAGTGATGCCTCAATGGGATGTGCTTGCTCCGTTCGTGGAAAACAGGGTTCTTTGGCAGGGCCAGCGCGGACTTGCTGTCCACCAGGAGCTGCACCGTTCTGGTGTCTCGGACGAGGAGATCACCAAGCAGTCGAGCGAGCCAGAGCGCCTGAGTGCAGGCGGTGGAGGCCTCCATGTACTCGGCCTCGCAACTGGACAGGGCCACCACCTGTTGCTTGACCGACTGCCAGCTCACGAGACACTTGCTGAGGAAGAAGAGGATCCCGCTTGTGCTCTTACTGGTGTCGATGTCGCCGGCGTGGTCGCTGGCGCTGTACCCGACGAAGTGTGCCACCTCCGAACAACTAGGGTAGTGGAGGCCGTGGTCGAGGGTCCCTACCACGTAGCAGATGATCCTCTTCACTGTTTGCTGGTGCTCCGTCGTCGGTTGCTCCATGAACCGACTAATGTAGCCGACGGAGAATGCCAAGTCCGGCCGTGTGTGGGCGAGGTAGCGAAGGCTCCCCACAAGGCGCCGGTACTGTGTAGCGTCCCCTTCCTCCGTCGTGATGTCGCGGCTCAGTTTCAGCCTCTCCTCCATCGGAGTGAGAGCTGGGTGGCAGTCGGTGAGCCCAGCTAGCTCAACGATGCGCTTGGCGTAGGCGGACTGTCAAAGCGCGATCCCGGAGTGATCCCGGTGCACCTCGATCCCTAGATAGAAGGAGAGGAGCCCCAGATCACTCATCTGGAAGGTGGCCTTGATTTCTTCCTTGAACGCCGCCACCTTTGCATCCTTGATGCCGCTGATCACCAAGTCGTCAACATAGACACCCACCAGCAGGGCATTTCCTCCACTGCCCCGTCGGTAGACGGACACCTCATGCGGGCTTTGCTCGAAGCCCATCTTCTTTAGCGTGGACTCCAGCTTGGCGTTCCACGCCCTACGTGCCTGCCGTAGGCCATAGAGAGCCTTACGCAGGCGGAGTACCTTGCTCTCCTGGCCGGGGATCGCACATCCCGGCGGCTGATGCACGTAGACTTCCTCCTTCAAGTCGCCGTTGAGGAACGCAGACTTGACATCCATGTGATGGACACGCCAGCCCTCCTGGGCAGCTAGCGCAAGGACAAGCCGCACGGACTCCATCCGTGCCACCGGAGCGAAAGCGTCGTCGAAGTCGACTCCTTCCTGCTGCAAGAAGCCTCGGGCCACCAAGCGAGCCTTATGCTTGACGATGGCGCCGGCTTCATCCCTCTTCAACTTGAACACCCACTTAAGGGTGATCGCGCGGTGACCATGAGGGAGGTCAGCGAGCTCCCAGGTGCGATTCTGCTCGACCGCATCCGTCTCCAACTGCATTACGGCACGCCATGCCGTGTTTCTCTCGACCTCTGCAAAGGACCGAGGTTCGCCGTCGTCACACGCAAGTTGTAGTTGTGCCTCCAGGTCGCGTGGCACCAGTCCCGGCACCTGCTGGTAGCCGAGTAGGTTTTCCATCGTACGATACCGCAGCGGTTCGCCGCCATGATATGCGTCGATGCGCTCCTCGTCGTGAGGTAGCGGGAAGGCGAACTCCACCAGGCTGTGCTCGACGTGAGCTGGTGTTGATGAAGACGAGCCCGGAGGGGTGACTGTCGGTGCTGGAATACGTGGCGTCACCGCTTGTGGTGCCATCGGCGTAGCACGGACCAGGGTCGATGAAGTTTTGGGAACTGAGGTAGACGTGCTCGGTGAAGAGGAGTTGCTTGCTCCCCCCGCTTCCTTGAAGTGGACGTACTCGACAATGAAGTCGTCATACGTCGGCGTCGAGCCGTCGTCCACCGCCTTGTCCCATGCCCACCCTCGCCCTTCGTTGAACACGACGTCTCGCGTCGTGCGCACACACCGTGTCTTTGGGTCGAGGATGCGGTAGGCCTTCGAGCCCTCCGCGTTGCCGATGAAAACTCCCGGAGTGCTCCTGTCATCGAGCTTGCCGATGTGGCCGAGCTCCTTGGCGAACGCAAGGCAGCCAAAGATCCGCAAGTGGGAGACCGCCGGCTTCGGCCCATGCCAGGCCTCGTATGGCGTCCTGCCGTCGAGTGCCTTAGTAGGCGAGCGGTTGAGGATGTAGACGGTCGTCAGCACCCCTCTCCCCAGAAAACAGCCGGCATCCCTCTCCACTTGAGGAGAGCCCGAGCCATCCCCACAACTGTCTGGTTTCTCCGCTCGACGACGCCGTTCTGCTGCGGGCTGTACGGCGCGAAGTAGTAGTGTTGGATGCCCTCATCAGTGCAGTACGACGCGAATTCAGCCGCCGTTGTCGGTGTGCAGCACACGTAGTTTGTGGACGCTCTCCGCCTCTGCAGCAACCTACGCGCGCCTGATGGCGTCCGCCGCCTCTCCCTTGCTGCAAGGACCATCACCCACATGTAGCGAGTGAAGTCGTCGACGAGCAGCAAGAAGTAGCGTCAAACTCCTAGTGTGGCTGGCGTCACCAGGCCGCACAGGTCCCCGTGCACGAGCTCAAGCCTCTCCTTGGCCCGGAAACTCGCCTGCTGGGAAAAGGGGAGTGGCCTCTGCTTCGTCAACACGCAGATGTCGCAGAACTGCTCCACATGGTCGAAGCATGGCAGGCCTCGCACCATCTCCTTGGCACTTAGACGCTTCAGGGCCTCGAAATGAAGGTGCCCAAAGCGCTCATGCCATTGCCACGCCTCGTCGTCCCGACGGGGAGTGAGACAGACGGGTTGTGCCACCTGCACGTCAAGGACGTAGAATCGATTTTCACCTCTGGGTACCTTGGCGAGAAGGCGACACTGGCGACCCAGATGCATAGAAAACCATGCTCAATCAGCACGCGTGAACCGTTCTCATCCAGCTGTCCCAAGCCGATGATGGAATTCCTTAGCGCGGGGATGTAGTAGACACCGGTGAGCAGCCGGTGCTCTCCCGTCATGGTGGTGAAGATGGCGGAGTCGACGCCCTTGATTTCCACGACAGAGGCATCCCCAAACTTGACGGAGCCTCGCCGTCGGAGTCGAGCTCGGCGAAGAATTCCCTTCGACCGGTCATGTGGTGGGTGGCGCCGGTATCGAGGCACCACCCCGTAGTCTTGTCCTTCTCGGAGCCATCGCCAAGAAGAGCGTGCGCTTTTGGCTCGTCGAGGTGGAGGAGAGCCTTTGCGGCTAGTGTCGCTGAAGGTAGCTCGATGCTTGCATGCGCCACGAACAGAGCTGTCGGCGCCGTCGTCCGCAGGCGCGGAGCCGTTGGAGCTGCCGGCATCCGCCGTAGCCTCACGTGTTGCCTCCGTTGCTGTTGTTGCTTCTACCTCCGTATTGGCTGCTTCTACCTCCGCTCTGGCTGCTGCCAGCTCCGCCGCAGCCAGTCTCAACGCCTCCTGCCGACGCCGTGTGCTGAGAGCGGCCTGCAGACATGGCTCGCCGCTGGGAGGCTGTTACGTGGAGAAGAAGTTGCTTCTGACGAGCTGCTGCTCGACAGAAGGGAGGGAGGTAACCAGGGGTAGTCGGAGCAACTGCTGCTACCGGCTGGGGCTGCTCAGATACTGGGGAGAGAGGTGAGCAGAAAATGCTCAGGCTACAAGAAACACTGGCTCTAATACCACTTGTTAGCCGTTTCAGCCTAAGCATTGATAGTTGTGGATGACACTAGGAGAGTTGGGGCGATTTTCGTTGGTTTATTTCTCACAGAATGCCATGCCAACCTGAGGGGTTGGGGATACATATTTATAGGCTGCTAGCCAGCCAAGCATATGCTAAGATGCTAGTCTAAGATGTTGCTAAGATGCTAGTCTAAGATGCTATCCTAACTGTCAGTCCTTGGTGGTCAAGGATGCTATCCTAACAGCCACAACGACACAAGGACCATGTGCTGCAGCCCCACAAAGNNNNNNNNNNNNNNNNNNNNNNNNNNNNNNNNNNNNNNNNNNNNNNNNNNNNNNNNNNNNNNNNNNNNNNNNNNNNNNNNNNNNNNNNNNNNNNNNNNNNNNNNNNNNNNNNNNNNNNNNNNNNNNNNNNNNNNNNNNNNNNNNNNNNNNNNNNNNNNNNNNNNNNNNNNNNNNNNNNNNNNNNNNNNNNNNNNNNNNNNNNNNNNNNNNNNNNNNNNNNNNNNNNNNNNNNNNNNNNNNNNNNNNNNNNNNNNNNNNNNNNNNNNNNNNNNNNNNNNNNNNNNNNNNNNNNNNNNNNNNNNNNNNNNNNNNNNNNNNNNNNNNNNNNNNNNNNNNNNNNNNNNNNNNNNNNNAGACCTTAGTACAGAGACTTATCGATCACGGTTCAGCCACTGCATATTATTAACCTCGGTCCTCCTCCTAAGCTTGTTAAGAATGATTTTGCAAACTAGATTTTTCGTATCAAGGCTCATTTGAATCACAGCTCAACACAACTTTGGAGAATCATTGAGCAAGGCTACTACCCATATGATCCAAGAAACCTCACTCCAAGAGAAGAGGTCGGCAATCAGCTCAATCACTCCGCCTTGTTCATCCTTCAAGCAGCAGTTCCCATTGAAGATCTTGCTCATTTGCATCCCTTCACTCATGCCAAAGATTATTGGGAACACATCATTTCCATGTACAAGGGAAGCTCAAGTATTCAACGGTCTAACTATGAAGTGATACTTGATGAGGCCGATGAATTTGTTATGATTGAGGATGAGGACCCTCGTGAGCTCTACCGAAAAGTGACCATCGAAGAGTGACAACGCTTGTCGTTGCTCTTCAAGATCATGGAAGCAAGGATGTGGATGACAATTGGATCAAGCGTAAGTTTCTCAAGGCTATCATGCCTTTCAACAAGTCCATGTCCTCCATCATCCGTCAAAGGGCAGACTTTCACTCCATGTCCTCAAGCGATGTGTTGGATGAGTTCATTGCCATGAACATATTGAACAAGACCGCTGACAATGCTCTAGCTTCTGTCCAACGGTCAAGAAAAGACTCACCAAACCTTGCTTTGAAGGCCAAGGCTGCTGTGGAGGAAGATGAAGAAGAAGAGGAAATGTGCCCCAAAGACACCAAGTATGCTTATCACGAGCACATGGCTCTTGCGTCAAGGCGGTTTTGGGGCAACAAGAGAAACTCAAAGCCCAATTTCTCCAAGAACAACTCAAGTGGGTCCAAAGGCAAGCAATGCGTGAGAACTTGCTACAACTGTGGCAATGTGAGTCACTTTGTGACAGACTGCCCTTATGAGAAGAGGGAAGAAAATGGTGGCAAGCTTATTCGCAAAGACAAGGTCAAACCCTTTGCCAACAAGAACAACTTCTCCAAGAAGATGCCCCAAAAGGCGTTGGTGGCTCAAGAAGAATATCTCTCCGATGAGGCTGATGACGATGATGCAAGTGGTGAAGTAATGGGAATGGCCACGGTGGCCACTGCATCCTCTTCCCCAAGCAAGGTGTCCCTCTTCAACGCCCCCAACGAGAACCGTATTGCCAAGTGCCTCATGGCCAAGGCATCCAACAAGGTAACCTCCAATATCAAAACTATCATTTCCACTACCCCTTCTCCTATGGTTAGTGGAGATGAACGAGAGGAGGTAAATGATGAAGAAAATTCCTTTGATAGATTCATGAGAAAAGTCAAGGGTAAAACCAAGAAGCATTTTGTTGCTCTCCTGGAACAATTAGGGGAGGCTAATGACCTCACTGAAACTCATGAAGAAACTATCTCTACGTTACAAGGACATAGTCGTGACTATGCCGATGAGATAGTGGATCTTTTCATTGCTCTTTGAGGAAGAGCAAGGGCTTTGTTTGGCTCTTGAGGAGTCACACAACGATGACCTTGCTAAATTACAGAAAGATCATGATCATGCTCTTGTTCTTACTCGTGTGCTTAAAAATCCGAAAAGGTTGCACTTGGGGTTGACCATGCTAGACTCGAGGAAGAGCTTGCCATACTTGACAAGGCTCACAAGGCTTTGAAGAGTGCTCATGCTTCTTTGAAAGAGTCCCATGCTCAACTCCAAGTAAAACTCACTAAGGAAATAGCCACATGTTCTCTGTTTGTTTTCATTGATAATGCCCATGCTACTAATCCATGTTGTGAGCATGTCCATCTTATGGAAGAGAATGCCAAATTAAAGGAGCAGCTTGAGAAAGGCCTTGTGACATGCATTCAAGGCGAAAATAATCTCAATAACCTTCTGAGCAATCAAAAGGAAGTGGTTGCAAAGGAAGGAGTTGGGTTTGCACCCAAGGCCAAGAAGAACAAGAAGATCAAGACCAAGCAACCTCCCCTGCTTAAGGAAACCGTTGTCAAGGCTGGGGAGTGTACTCACAAAAAGAAGAAGGGCAAAGCTAAAGGTGGTAATGCCAAGAAGGGCAAAACCCACCTTCCCAACAATGCCGGTGACTTTAACCCATCTTATGTTTTATGTCGTGCTAGTGATGGAAATGTATTTGCTAAATTTGTTGGTTCCCCTTATGAGTACATTGAATGGTCTATTGGGGTTCCTAAGATCCTTCTTACTAACGTGAGAGGACCCATTAAAAAATGGGTACTTAAATCCAAACATTGATCTTATGCAGGAGTTTGCTTTCGGTGGAGTGTCATGGTTGCTTGATAGTGGAGCGACAAATCATATGACCGGAAGCAAGGACTGGTGCTGGGCTTTCATCCCGACCCATCCATGGCCACCCAAGTCTCCTTTGGTGATGATGTGATTTCAAAGGTATTGGGTCTCGGCAAGGTGGTAATTTCTCCGGAACTTACCATTGAAAAGATCATGCTTTGAGACCCTCGCATACAATTTACTTTCCGTTCATCAACTTGCACTCATGGGTTTTAGTACGTTCTTTGGTATTGACTCTGTGGCCCTTTTGTGGAGCAAGACTCTTAAAGTAGCTTTTGTTGGGCATGTCAAGAACGGTCTCTATGTGATAACTTTTTGGAGCGACCACTACAACGACTTGCCTAATGGCTAATGTTGATGTGGGATGGCTTTGGCATCGCCGGCTAGCCCATGTCAATATGAGATCTTTGCAAAGTCTCCTCAAAGGGGATCATGTTCTTGGACTAACAAATGTGAGTTTTGCCAAAGATCGTGCTTGAAGTGCGTGCATTGAAGGAAAGCTACATGAGACAGCTCACCACCCCACGCCCTTAGAGCTCCTCCACATGGATCTCTTTGGTCCTCCATCTTTCAATAGTCTTGGGGGAAGAAAGTATTGCTTGGTGATAGTGGATGATTACTCAAGATATACTTGGGTGTACTTCTTCAAGAGGAAGAGTGAGACCCAACAAACTGTCATCGACTTTGCCAATGAAGTTCAACGTCAACATGAGGCAAAGATATTGATGATTAGAAGTGACAATGGCACCGAGTTCAAGAATTACACCTTAAATGAATTTCTGAGTGACAAGGGAATCAAGCATCAATACTCCGCACCATATACCCCTCAACAAAATGTTGTAGAGGAAATGAAGAACCGGACATTGATGGACGTGGCAAGAACCATGATGGCGGAGTTTAAATCTCCATATAACTTTTGGGCCGAAGCCATCAACACCGCATGTCATGCATCTAGTCGGTTCTACCTCCGCAAAGGGTTGAACAAGACTCCTTATGAAATTCTTACCGGTAACAAGCCCAACCTCGAGTACTTCCGGGAGTTCAGTTGTAAGTGTTTCATTCTTAAGAAAGGTGCTCGTTTGTCTAAATTTGAACCTAGAGCTCAAGAGGGCATATTTGTTGGTTATGCTAGAAACTCTCGTGCTTACTGTGTCCTCAACAAGTCCAATGGACTCATTGAGGAGACGTGTAACGTGGAGTTTGATGAGAATAACGGCTCCCAAGTGGAGCAAAGTGGTCTTTTGTGATGTAGGTGATGAAATTCCTCCCCAAGCCGTAAGAAGAATGGGTGTGGGACACTTCCTACCCGTTGAGGAACCCCTTGTGGCAGAAGGAGAAGGACAATGTTCCACTCAAGTGGAACCATCACCGACACAAGAAGCACACGCTTCCGAAGAACAATGTGAAGGCCCTCAACCTTGTGATCAAGATCAAGGAGAAGATCAACCACATGATGGTGCTTCATCAAGTGATGTCCTTGATCAAGCTCACACCTCCGAGCAAGCTCAAGATCAAGAGCATGCTCAAGATCAAAACCAAGCTCATGATCAAGACCAAATTCAAGATCAAGAGCAAGCTCGCAAAGGCGGTAAAGGTCACAAAAAGTTTCCTCATCAACTTACCCCTGAGGAGATTCGAGAAAGATGTGCCGCCAGGGATGCTGCCAAGCTCATAAAGAATTCACATGTGTTAGAGAATGTCTACGGCAGCTTGATGAGAGGGGTAACCACTCGCCGTCAATTAACAAACTCTAGTGCCCATCATGCGTTTGTTTCTTGCATTTAACCTCTAAAGGTACAAGAAACGCTCGAAGACGTGGACCGGGTTGAAGCCATGCATGATGAACTCAACAACTTCGAGCACAACAAAGTGTGGCGATTGGTGCCAAGACCGAAGGAGAACCACAATGTCATTGGAACCAAGTGGATCTTTAAGAACAAGCAAGATGCAAACGGTGTCGTCATTCGTAACAAGGCAAGATTGGTAGCACAATGCTACTCCCAAGTCGAGGGCATCGACTACGGTGAAACCTTTGCTCCCGTTGCTCGCCTTGAATCTATTCGCATGTTGTTTGCATTTGCTTCGCATCATAACTTCAAATTATATAAAATGGATGTGAAGAGTGCATTTCTTAAGGGTCCCCTTAAGGAGTTGGTTTATGTCAAGCAACCCCTGGGGTTCGAGGATCCCAAGTTCCCCAATCATGTTTACGTTCTTGATAAGACACTCTATGAGTGTGGTATGACCACCTTACTGAGATGTTACATGATCGTGGGTTTGAAATTGGGAAAATTGACCGCACTCTTTTTACTAAGGTCAAAGGGAGTTTGTTCATATGCCAACTATATGTTGATGATATTATCTTTGGTTCTCCTAACAAAGCTTTTAATGAAGAGTTTGCCACATAATGACCAAAGAATTTGAGATGTCTATGATGGAGGAGTTGAAGTTTTTCCTTGGATTCAAAGTCAAGCAAAGAAGTCAAGGGACCTTCATCAATCAAGGTAAATATACCCAAGACATGCTCAAGAGGTTCAAGATGGACGATCTCAAACCAGCCAAGGCAAACACTCCCATGCCTCTCAACTGCCATCTTGACCTCCATCCCAATGGTAAAGCTGTGGATCAAAAGGTATATCGCTCTATGATTGGCTTTTGCTTTACCTTTGTGCATCTAGACCAGACATTATGTTGAGTTTGGGAATTTGTGCACGATTTTAATCCGCACCTAAGGAAAGTCACTATGTGGCGGTCAAGCAAATCTTTCGATATTTGGCTCATACCCCAAACTTTGGCTTATGGTATCCCAAAGGTGCTTCATTTGATCTCATAGGATACTCGGATCTGGATTGGGCGGGATACCGTGTGGAGGGGAAGTCAACTTCCGGAGGTTGCCAACTTCTTGGTCGCTCTCTCGTAAGTTGGTCTTCCAAGAAACAAAATTGTGTTTCTCTCTCGTCCACCGAGACCGAGTATGTCGCTGCTGCAAGTTGCTGTGCTCGGTTGCTTTGGATGAGGCAAACTTTAGAGGATTACGGTGTCACTTGTGACAAAGTGCCTCTTTATTGTGATAATGTAAGTGCAATCTCGATCTCCAACAATCCGGTTCAACACTGCAAGACGAAGCACATTAGTATTCGTCACCATTTCATCCGGGATCATATCATGCGTGGGGAAATTGATCTCATTTACCTTAACACTAATGATCAACTTGCAGACATTTTACCGAAAAAGGCTTTCGCCCCGCTTTACACATAAAGCAAACCACCATACCAAGAGTACAAGCATAAGATCAAATCCAGACACACACATACACACACCCAAGGTAGCACGACGCCAAGTACGGGGGTTCTGCTGAGGGCACATCTCAACAAGCCCTAAAAAACAAAATAAGGCGGAGGGACCGCAATAGAAGCGACTAATCTGGCTCTGGAGGTGGCAGCGGCGCCAAGCGGAAGGCCATCATCCGAAGATCTGCGATGATTGAGTTGATGGCGTCCTGATCCTGGAGGCGGCTAAGCGGCCGCCAAAGCTGATATAACCACACATTCTGAACATTGCGTCAGTCCCACGTGTGAGAGGAACTCATTGAATTACAAGCTTATTTCGTACCGTCTATAGCGTCCAAGCAAGGACCGCAATGGTCAGACAACGAATGTGACGGCCCGAAAAGGGGCAATGGTCAGACAACGAATGTGACGGCCCGAAAGGGGGAAGCCAGGATCTCGGCGTAAAGATCGGGAAGGTTAGTGTTACACCAACACCCCCCAATGGTCTCGCGAAGGCAAGTCCAAAGGAACTGAGCGGACACGCAACGAGAAGAAAATGTGATTCGAGTCTTCCGCCGTTCCACATAGGGGGCACAACCCGTCTACCGAGCCATTACGCTTAAGCGCCTCCATGCCAGATGGGACCCGGCCGCGGATCCACTGCCACATGAAGATCCTAATCTTTAGGGGTAGCCTGATCTTCCAGATCAGCTGAAAGGGCTCCGGGGCGGGAGTGGCAGCGATGGCCCGATAAAGAGACTTGTGGAGAACATGCCCGAAGTCTCTAGGTGCCACGAGGTGCGATCGACGCTCTGGTGAACATCCGGTTCGTTGAGGGCAACAGTCGCCAGGAGCTCGAGCCAAGCAAGAGTTTCCGAGGGCCCAAATGGCCGCCGGAAAGCCAGGCGCCCAAAGTCAATAAGGGTCGCCTCGACAGAGATCCTCGGATCCACTGTGATGGCAAAAAGGTCCGGGAAGCGAGCAGCTAGGGGGGACGTTCCCACCCAGCGGTCGAACCAGAACAAGGTGGATTTCCCTGAGCCCACCTCGATGGAGGTCCCAATGCGCAGCACGGGGAGCAGCTGAATGACCAACTGTCAAAACTGCGAGCCACCGGATCTCTGACAGAAAGCCAACGGCTAGCCACGTAGGTATTTTCTCCGGATGATACGGAGCCAAAGACCTCGCCAACGGGTCAAGAGGGCAATGTTCATGCGCCTGGAGGACATGATCCCAAGGCCGCCCTGGTCGCGAGGTAAGCATATATCGGGCCAGCGCACCATATGGTATTTCTGCTTACCACCATCACCGGCCCAAAAGAACCTTGCCTGGATGGTGCCGATCTCGTGATGAAGCGTCTCTGGCAGGCTTTAGAAGCTCATAATGAATAGGAGCAGGCTGGACAAGGAGGAGTTAACAGGGATCGTCCGTGCCGCCTTAGACAGCCAACGGCCCTGCCACGGCTCGATACGGTGTTGGAGCTTGAGCACGGCCGGTCGAAGGTCCCCCACGGAGAGGCGCGAGTCACTAATGGGGATCCCCAGGTAAGAAGTGGGGAAAGTCCCCAGCTGGCAGTTAAGCCTGTCAGCAATGCCCTGACTTTCAGAGGGGGAGTAACCCATAACCATCACTTCGCTCTTGTCGAAGTTAATCTTAAGGCCAGACATCTCCTGGAAGCAGAGTAGGAGGAACTTCAAGTTCGAGATATCGGCCGTGGAGCCTTCCACCATGATGATGGTGCCGCCAGCGTACTGCAGCAGTGAGACCCCGCAGTCATCGACAAGGTGGGGGACCACGCCCTGGATATGTCCCGCGGCCTTCGCCTTATCCAGGATGGAGGCCAACGCGTCAGCCACCATGTTAAACAGGAATGGAGAGAACGGGTCGGCCTACCTAACCCCACAAAGTGTGAGGACGTAGGGGCCGATCTCTCCATTAATATTAACCACGGTCCGCCCGGAAGAGACAAGTTGCATGACACGGGTAACCCAATGGTCGTCGAACCCCTTCCGAAGTAGCACTTCCCAAAGGAAGGGCCAGCTAGTCGTGTCATAAGCTTTGTGGAAGTCGATCTTCGGGAATACCACTTTGAGGTGTTTAGTACGGACCTCATGTAAGACCTCATGGAACACCAGAATCCCGTCCAGGATATACCGGCCACGGATGAATGCCGACTGGTCGAGGTGGGTAATACGGTCGGCCAAAAGGGTCACCCTATTGGTGTACCCCTTTGCCAGGATGCGGAAGATCACATTGATCACCGTTATAGGGCGGAACTGGCGAATATTCGAGGCGCCAGTTACCTTCGGTATCAAGGTAATGATCCCATAGTTGAGGCGGTGGAGGTCTATGGAGCCTACGTAGAACTCCTCAAACAGGGCCATCACCTCATGCTTAGCGACATCCCAGAAGGTTTGGAAGAACTTGACCGGCAGGCCATCGGGGTCTGGGGCGGACGATGGGTTCATCCCTTGGATGGCCGCCCAAACCTCCTCCTCAGAGAACGGGGCCGTCAGCGCCGCGTTCTCCTCCACCGAGACAGATCGGTGGCCGGTCCAGAAATCAGCTGCCAAAGCGAGTCCACTTCTAGGAGAGGAGGAGAAGAGGGCCTTATAGAAGCCATCGACATGCTCGCGAATAGCAGCCGGGTTCTGGAGGAGGGTCTCGCCATCCCAGAGCAAGGTGATGGAATTCCGGCGCCTACGACCGTTGGCGATGGCCTGGAAATATGTCATGTTGGCGTCACCCTGGAGAGCCCATTTCTGGGTACCTCGAAGTCTCCAGTACGCCTTCTCATCAGTATATATGGTTGCTAGCTTATTCTCGAGGTCGTAGCGTAGCAACGACTCGTCGGGGGAAATGCCTACTGAGTCAGCCCGAAGGTCCAGCGCCTGAATGGCGACAAGGATGGACCGCTTGCGCTCCCGCAAGTCCCGACCGAGATTTGCACCCCATCCCTTCATGAACTGCCGTGCGCGCTTGGCACAGAAGTGCCAATGGTCGACCGCGGAAGAGGACCGATGGGGGGGCCAACCGGGCCTCAGTCCAGCGAGCACTAACAGCCGCAACGAAACCGTTCTGGTTAAGCCAAAAGGTTTCGAAGCGGAAACAAGGAAAGGAGGGGGGCGGTCGTCATCCGAAGAAAGGAGCAACGGGACATGGTCCGAGCCAATCCGGGTGATAGCCCGAAGGGAAGCCAGGGGACAACGGAGTTTCCAGTCCGGAGATACCAGGACCCAATCCAGGACGGAGCGGGTCGGGGTCGCCTGATGGTTGGTCCAGATGAACCTAGGACCAACCCTATCTAGTTCCCGGAGGCCGAGTTCAGCAATGCAGTCATTGAACATCTGCATCCTCGGGAAGTTAACTAAGTCGTTGCTCTTATCGCAAAGCGGAGGAGGTTGAAGTCGCCGCCCACCACCACCGGAAGGGTAGCGGCGGAGACCTTCCTGCTGAGCTCTGCGAGGAAGGTTGCGGATCGGCTGTAGACGGCCGGGCCATAAACAACAATGATCTCCCATTTGAAGTTGATGGACCGTTCGAAGATCTCCATACTGACAAAGAATTCGCCTCGGTCCATGCTGCCCACCTCGAAGGTGGCATACATTTTCACGTAGCCATTAAATGAAGCAAGATTTCGCGAGTTAAGGCATAAGGTAAATATCATAGATTTGAGCAATGTGAATTGAAATTAGGCACACCCCACCACTCTCGTCATACTATCTTGTTTAGATGTAGGCATGGATTTAGGGGGAGTGTTATTCTCTCAATGATCTCTCCCTCCCCCTATTATGCATAAATCGATCAAGTCTTTCACATTAGTCATTTTAGATGACACTTGTGCTTCAAAGTCGAGTTTTGGTCATGGGCCCAAGGTTAACATCTTCGTTGTGCCATACTGTTGAGTATCGTGGTTGTTTAGGAAACATAGATAGACTAGGATTTGTTTCCTGCCTTGATTTGTACTCCATTGATTTCTACTCCAAGATGATCATGTACTCCTATATATATATATGCCCACAAGGCTCAAGAAATACAACAACTATTCCACCAAGCTCTCTCTCCCTTCTAACATGGTATCTGCCGCAAGTTCCTAGACCTAGCCGTCGCCCACCGCTTCCGCCCCGCGCGTCGCCCCTGGGGCGGTCTGACTCCATGACGGCCGCCGGGGGCCGCGCCGCCCATACCTAGGGTTCGTCCGCCGGTCGTGTTGACCGGCTGCCCTAGAGAGTCTTTTCCCGATCTCTTGATCCGGGTTTTCTCTCTTTCGCCGGTCACTTTGATCGGCGTTTTCTTTTTGATTTTCCGATCTAAAGATCGGTTTGCGTCGCCCACCGCCGCCGTCGACTGTCGCGCCTCTACTCCGATATCGGCGCGCCACGGCCACTTCACCGACCAGGCGGCCTCGCGCGAAGCGGCGGCCCACACGGTTGTCGATTGCGTGTCTGCTTGCCTGTAGCCCTGCATCAACCGTTGCGCCCTTCTCGGACCGGGACTGCTTCATCATCACCCGCCTCCACCGACGCCTCGGGCCGGCTGTGACGGGCCGGCTCCGGCCGACGTCGGCTGCCTCGGGCCGGCTGCAGGTTCCGGCCGGCGTCGGCTGCCTTGGGCCGGCTGCCGGTTCCGGCCCCGTCGGCCTCGCCACCTGCCTTGGGCCGGCTGCTGGCTGGCGGCCGTGTCGGCCTCGCCGGCTACCTCGCCGGCCTCCTCAAGCAGGTTGCCTTCTCCGGTTGCGACCGTCATCGGACGCATCGGGGCGGCTGCCACGGGCCAGCTGCCGGCTCCGACACGTGACCGTCGGCGGCGGCCTCAACTCGGACGCCGTCACCCCGCCTCCACCAAGCGACGTCCTCGACATCGCGCCCGATCAGACTGATCACCCGCCCGTCCGCGATCCACCTCATCTATGTCGTGCGACCGACCTGTCCCGTCGGTCGCGCACGCCTTCGCAGGTCCCGTGAAGACTGTCCCGTGTAAAGCGCGCCCCTCCACCGATCGAGCATCCGGCTGCCGCTGCCTCGCCCTGTCGGGCCGCAGCGCCGCCGCCCCGTGGTTCTCCTCGTGGCTGCACCAACCCACGACCTGCCACTACCCCGCCCCTTCGGGCTGTAGCGCGGCGGCACGCGGTCCGCACCGCCGCCCGAGGCCGTCCCCGTGGCTGCACCGACCCGCGCATCGCCGCTACGCCGCCCCGTCGGGCCGTCACATCGCGGCACGCGATCTTCGCCGCCGCCCCGAGGTCTTCCCACCGTCGCCCTGACCCGCGCGCTGCCGCTTTGTCGCCCCTTCGGACCGTAGCGCCGCGGCACGCGGTCCACTCCGCCATCCCCGCGCGTCGACTTCATGTGGTATGCGCCGCGCCGTCTCCTTCGGTGCGGGAACGCCATCGTTCGCGCCGATCTTCGTCACGCTGTCAGGTTCTTCCTCGCCTACTTCGAGCATCCCCGTCAAGCTCCTAACCAGCCGCCGCTGCTCCTCTTCTTCGACGCTGCTGTAGCTCGCTCACCCGAGCAGCGCCGTCCGTCCACCCCCTTCATCTTTCGTCCAACATCAGCTCATCGCCAGCGTCGCCGTTGTCTACCGCGACCACTTCGTCTACTCTGACCACCGCGGGCAACATCGCCCACCACCCCCCCCCCCGATTTGCGNNNNNNNNNNNNNNNNNNNNNNNNNNNNNNNNNNNNNNNNNNNNNNNNNNNNNNNNNNNNNNNNNNNNNNNNNNNNNNNNNNNNNNNNNNNNNNNNNNNNNNNNNNNNNNNNNNNNNNNNNNNNNNNNNNNNNNNNNNNNNNNNNNNNNNNNNNNNNNNNNNNNNNNNNNNNNNNNNNNNNNNNNNNNNNNNNNNNNNNNNNNNNNNNNNNNNNNNNNNNNNNNNNNNNNNNNNNNNNNNNNNNNNNNNNNNNNNNNNNNNNNNNNNNNNNNNNNNNNNNNNNNNNNNNNNNNNNNNNNNNNNNNNNNNNNNNNNNNNNNNNNNNNNNNNNNNCCCCCCCCCGATTTGCGCCGCAATTGTCGTAGAGTCCTCTGCTAGCCTCCTCGACATGGCGTACAAGTTGTGTGCAAGTACCCGTCTACGCATGCCCGGTGCTGGCAACACCAACGCGTGCCTTAGCCCCGGTGTGTTCCCAGGCCTGGGAAGCCTGGAGAGACGCATCATCAACACCGACTTCGTCCGTCTACGCATGCGTGGTGCTGGCAACACTGATGCGTGCCTTCGTCCACGACGTGTCCCCGTGCTTAGCAACCCCGACGCAATGCTGAAAACACAATTGCTCCCTAAGGTGGTTTTGATAATTGATCACAACATACGCATCATTGGACTAATGAGTTTATCTAAGTATATTTGAGAAAAGTTCAAAGATGCCTTTGGCTAAACGATTGTGAGGAGAAACCGCTTTGAGGAAGGAAGGAATAGGATTGGCTCAAGCTTCAAGCAAGAAGACTCTACATTTTACATTTGTGAAAAATCACTTTGAGTCCATAGGAAAGCCAATACTATTAAAAGGGGGTGAGGTATTATAATGAATTGGTTGCTCAAGTGCTTACAGATAGCCACCAAAAATATTCAGCCATTCTCCCACATGATATCTTTGTCCAAAGCTAAACCAGCAAATCGGTGCCACCAATATTTTCCACTCGGTCCTACTGATTTTCCACCAGAGAGATCCTTTGCAAACCCTAATCTCTCGGTACCACCAACTTTCATATCGCTACCACCGAGATTCAGTGACCAACTTTCTGTTGAGAAAATTCCAAGAATCTGAATTTCCGAGATTGGAATCGGTCTCACCGAGATTTGGAAAGTTGTCTAGGTCATCGTATCGGTAGCACCTGATGGATAAGTCTATGTACTATGGTCNNNNNNNNNNNNNNNNNNNNNNNNNNNNNNNNNNNNACTCGAACGGGAAACTGCAATCTGTTTCTTCGTCTTCCAGGCAATGAGAGAACCACCAAGAAAAACACAGTAAGCAGAAAGTGAACGGCGATCTGAAGGATCACTAGCCCACGTAGCATCCGAATAGGCCTGAAGCTGTAAAGAACTGGAGCGAGGAAAGTATAGACGGTGAGAGATCGTGCCCCGAAGATATCGGAGAACACGGAGGAGATGACTATAGTGAACCGAGGTGGGAGCAGAGACGAACTGACTCAGAATATGAACTGGATAAGAGATATCCGGACGAGTGATAGCTAGGTAAACAAGACTGCCAACAAGATGACGATAACGCGTCGGGTCAGGCAGGGGATCACCATCAGTAGCACAGAGGTGAACATTGAGCTCCATAGGAGTCTCAACAATGCGCTCATCAGTAAGAGCAGCACGAGCAAGAAGATCCTGGATATACTTTTCCTGGGATATAAAGAAGCCATCAGAGGTAGAAGAAACTTCAATCCCAAGAAAGTAGCGAAGAGGTCCAAGATCAGACATAAGGAACTGCTCACTAAGATCGGCCTTAACAAAGGCAATATACTCGGGGTCATCCCCAGTGATGACCATGTCATCAACATAGAGAAGAAGAAGAGTCCGACCAAGAGGAGAAAGGTGAATGAACAATGCTGGATCATGAACACTGGGTGGAAAACCAGCGGGAGTCACCACAGAGGCAAAACGGTCAAACCAGCCGCGGGGGGCTTGTTTTAAGGCCATAGAGAGAGCGACGAAGACGACATACCATGCCATCAGGAACAGAATACCCAGGTGTTGGCTGCATGTACACCTCCTCACGCAGCTCACCATTAAGAAAAGCATTCTTAACATCAAGCTGAGAGATAGACCAGTGGCGTGTAGAGGCCACGGCAAGAAGTGTACGAACAGTGGTCATATGAGCCACAGGAGCAAAAGTCTCGTCATAATCACGACATGCTCCTGCTGAAAACCACGAGCCACAAGACGAGCTTTGTGACGCTCAAGAGAACCATCGGAGCGAGTCTTAACCTTGTAGACCCACTTACAAGTGATGGGATGGACTCCGGGAGGAAGGGAAACAAGATCCCACGTACCAGTGCGTTCAAGAGCAGCAATCTCCTTTGCCATCGCAAACTGCCATTCAGGATGAACAACAGCCTGATGATAAGTAGTCGGCTCAAGAACAGCAGCACCAGCGGTGGAAAATCCAAAGCGATCAACAGGCGGACGAGGACGAGAACGCAAGCCATAAGTAGGCTGAGACGAGGATGACGACACATCCACAGAGGCATCCACAGAACGTGAACGACGAGTGTAACACTGAGGAAACGATGGAACAATGGAAGGAGGAATCACCAAGGTAGAATCGGGGAGTGGCAATGAAGAAGTCACCAGAGATGAAGGTGTAGAATCAGGTGACATGCTAGACGAGGAGACCGTGGAAGATGGTGGCGACAAATCGACTGGAGGTGGAGAAGCAGAGGGAGCGGAACGAATAGGCGAAGGCTCGACTGGTGTGATAGGTGTGTCAGGAAAAGTGAGGAAAGAGATATCCTCCACTGAAAAGGTCGAGGAAGATGGGCGTGGGTAGAAGGGACGAGACTCATCAAAAGTCACATCCCGAGAGATACGCATCCGACGACCGATAGGATCCCAACAACGATAGCCCTTATGCTCATCACTATAGCCTAAGAAGACACTCAACAGACTGAGCGGTCAGTTTGGTGCGTTCACGGGGGGCAAGAAGAACATAGCAAACACAATCAAACAAGCGAAGCATCGAATAATCGGGAGAACGATCAAAAAGACGCTTGAAAGGAACACCACCCCGTAGAGCAGCGGAAGGCTGGAAATTGATGAGATAGGTGGAGGTGGAGACGGCCTCAGCCCAAAAATGAGGCGGGAGAGAGGCAACAATCATCAATGCACGAGCCGTCTCAAGAAGATGACGATGCTTGCGCTCAGCCATGCCATTCTGAGCGTGAGCACCAGGACGAGAATTGAGAGAGAGTCCCTTGCTCAGCAAGAACACCACGCAACATCTTAGAGATATACTCGCTAGCGGAGTCAGCACGGAACACACGAATGGGAGAAGAGAACTGAGTATGAACCATGGCAGCAAAACGCTTATAAATGGACAACACCTCACTACGAGAAGTCATGAAATAAAGCCATGTGTAACGAGAGAAGTCATCTATGAAAATAATATAGTATTTATGACCCCCTTTCGAAGCGAAGGGAGCCGGACCCCATACATCGGAATGAACTAAATCAAAAGGACGCTTAGACACTGACTCACTATGTGGATATGGTAACTGAATCTGCTTGCCAAGACGACAACCCTGACACTCTAAAAAGGCATCTCCTGAGACAAACCCCAGAAGACCTTGACGAACTAACAACGACAAAGGAGAACCACACAGATGACCAAGTCAATGATGCCACTGCTGGAAGGAACCAGTAGCCGAGGTGACCAAAGCGGAAGAACTGGCGATAGAGTGGGCAGCGAAAGGAACATGAAGCCAGTCCAACTCCCAAAGACCCTCAGAATCAAGGCGGCAAGGACCAGCCCCAACAAGAGTGTGCGTGCGACGGTCCTGGACAGAACAAGAGTCAAGGACAAGGATGACACGACAACCAGAATCAGCAAGTTGACCAGCGGAAAACAGATTCATGGTAAGTCGAGGAACATGAGCAACATCAGGAACAAAATAAAGAGTGGTAAGATTGCCTCTACTAACGACAGAAAGGGGAGTACCATCAGCGGTGACGACATGAACGGGAGAATCAAGCGATCAAAGAGAGGACAGAGTGGAAGAATTAGAAGTCATATGAAAGGAAGTTCCAGAGTCCAGAACCCATGGGGATGTACCTGACTGTGTAGAAGGTGGTTGCTCAGTGCGGGAAGCCTCAGTCACAGAACCAGCAGTACCCGTCGAGGAAGAACCTGAAGCAGCGAGCAGACGCTTAAGTCTCAGAATATCCTGCTCAGTCAAAGCGATGGCTGAAGCTGTCGAGGTAGATGACAAAGTCGCTGGAGATGATGATCGCGCCTTGCACAAGTGTTTCTTCTTCGTGTAGTAGTGGGACTCAATATGACCATCATTGTTGCAGTAGTCACAATGTGGACGGGGGCGACCTGAGCCTCCAGAAGGAGTGGGCAAGAGCGGCGAAGCACTCGAGCGAGAAGGGGTCGGTGCAGCAGGTGGCGTAGAAAAAGTCCGAGCAGCGAGCATCGAGGGAACCTCCAGCAAACCAGCACCACGTAAGCGAGTCTCCTCAGCACGAATCTCAGAAAGCGCCTCCATGAGAGAAATACGGCCACTAGCAAACAACTGAGCACGCCGGGGCTCAAACTCCTTACGGAGCCGAGACAGGAACTCGTAGACGCGATGAAACTCCAAGTCGGCCTAGACAGCCTGGTAACAGGGGCAAGTACGACTACCAGCACTGCGGAGAGAATCAAGCTGGCGCCAGATAGCAGAACTCTGTGCATAGAAGTCATCAACAGTAGAGTCACCCTGCTGAAGAGCATGCTCCTGACGAACCATAGAGAGGTATAAGGCATCACAGAGGGCTCATAGCGCTGACGAAGGCGAGTCCACATCTCAAACACAGTAGGAAGGCCCAGAAACTCAGAGGCAAACTGAGGCAGAACGCTAGCAGTGAGAACAGCTGCAGCACGAGCATCATCACCAAGCCACTGGGTGTAAGCAGACAGGGCAGCATGATACGTCTGAAGAGCCTCCTCATAAGCCAAAACCTTCTCATCATAAGGACGGATAGCGGCCTCATCAGCAAGCTTAGCCACATCCTTTGCGGCCTGAGGAGCATCCGCAGGAAGAGCCGATGGGGTCGGCGGAGTGGGAGCCACGGGAGGAACCGGACATGGCGGACAGCAGACCTCGCCAGAAAGAAAACCCCATAGGCGGATGCCACGCATGTGAATGCACATGAAGCCAATGAACTCGGTGTAGTTAGTGCCATCAAAGATCACCGGACAACGAGGAACAGCAACGTAGCCGGATGCAGCGGACATTTTTTTTTAGGAATCGCAGTCAACGAAACGCAGTTGCGTCTGAAAACGTATCTGCTTCGTCAGGAGCCGCGTCGATCTGGATCCACTTCGAGCTGGATCCGAGGCAAGGCGGCGGTTGATCTGGAGCCGCCCTCGATCTGGATCCGCGGAAGCGAGATGGGGTGGCGGCGGCTGGCAGCGGTGGCGGCGGCTGCGGAAGGAACCCGGCAGCGACCAGGAGCCGCACCAGATCGGGAGCGGGAGCAGCCCGGCAGCAACCAGGAACCGCACCAGATCGGGAGGGTGGAGCAGTCTCGGGATCGGGAGCTGGCTCGTTCCAGCGATGGAACAGCAGCAGGAGGAGAACGGCTGCAGCTTGCACGACGCAGGAGGAGACGTCGGCGAGAGAGGCTGCAGCGAGAGCTCGGGAAGGAGGAGAAAGCACGAGTTGCGCATGCGAAAAAAGAACCTAGGGCTCTAATACCATGTTAGGAAAGCAACTTGTATTCCCATTAGGCCATAGGCCGGTATATATACATGTACAGGTGGTGGACTATATGCAGGAAACCCCTTATATATTAGGATAAATACAAAAGGGTACATGACTTATATTATAACTCTAACAGAATAGATTCCGACCCCTTCCTCTTGCCATGGATGCCGGTATTGCCCCCGTTCTTTTCTTTGTTTGTGTTAGGAAGTATTAGTATTAGTCTAGCAGTCCTTATTAGTCTACTAGTATTAGTCTAGGAGTCCTTATTAGTCTATGTTTACTTTCCTTGCACCTCAAGTCATGTGTAATATATATATGCCCCTTGGGCCTTCAATATAGATAAGTTGCTTTCCTAACATGGTATTAGAGCCCTAGGTTCTTTTTTCGCACGCGCAACTCGTGCTTTTTCCTCTAACCCGACGCTCTCGCTACAGCCTCTCTCGCCGACGCTTCCTCTCGCGTCGTGCTCGTGCTGCAGCCGCGTCTCCAGCCTGCCCCACCCCGCCGCCGTCTGTCCAACGCCGCTGGATCTCGCTCCCGATCCGTTTTCTCCCTGGCTGCAGGATATCTCGTCCTCGCCGCTGCCTCGATCTGGAGGCCGACTCCACCTGTCTCGACCCTGAAGGAACGAAGGCGGAGAGCCCAGCAGGGGATCGATCTGGACGCCGCCGCCCCTTCCCGCTGCTGTACGCCGCCAGCAGCTTTGGTCTCCCATCCCGCTTCGCCCGGTTCTGCTTCAAGGTAGCCAGCAGCTTTGGTCGCTCCAGCTCGAGGCTGTCTACAACTAGTAGCCGCTATAGCTCGCATCTGGCAGAGGGATTGAGTCTGCTACAACCAGTCTGGCAGAGGGATCGAGTCCAATAGAGCCAGATCGAGTCCGCTGCAGCCAGATCTGACGCTACATCTCGCCAGATCGAGTCCGCTGCTGTCATACGCGGACGCGGTTTGCTGACTGAGTTCTAAAAAAAACAAAAATTAAAAACAAAGAAAAGAAAAAAAGAAGAAGATGTCTACTGCATCGGGCTATGTTGCTGTCCCTCGTTGTTCGGTGATCTTCGATGGTAGTAACTACACTGAGTTCATTGGCTTTATGCGCATTCACATGCGTAGCAACCGTCTATGGGGTGTTCTTTCTGGCGAGGTCTGCTGTCCGCCATGTCCGGTTCCTCCCGTGGCTCCCACTCCGCCGACCCCACCGGCTCTTCCTACGGATGCTTCTCAGACCGCAAAGGATTTGGCTAAACTTGCTGATGAGGCCGCTGTGAGTGCTTATGATGAGAAGGTCTTGGCTTATGAGGAGGCTCTTCAGGTGTATCGTGGTGCTCTGACCGTTTACACCCAGTGGCTTGATGATGATGCCCGTGCTGCAGCTGTTCTCACTGCTAGTGTTCTGCCTCAGTTTGCCTTTGAGTTTTTGGGCCTTCCTACTGCCTTTGAGATGTGGACTCGCCTTCGTCAGCGCTATGCGCCCTCTGGTGATGCCTTATACCTCTTCGTGGTTCGTCAGGAGCATGCTCTTCAGCAAGGTGACTCTACTGTTGATGACTTCTATGCACAGAGTTCTGCTATCTGGCGCCAGCTCGATTCTCTCCGCACTGCTGGTTGTCGTACTTGCCCCTGTTGCCAGGCTGTCCAGACCAACTTGGAGTTTCATCGCGTCTACGAATTCCTGTCTCGGCTCCGTAAGGAGTTTGAGCCTCGGCGTGCTCAGTTGTTTGCTCGTGGCCGTATTTCTCTCATGGAGGCGCTTTCTGAGATTCGTGCTGAGGAGACTCGCTTACGTGGTGCTGGTTTGCTGGAGGTTCCCTCGGTGCTCACTGCTCGGGCTACTTCTACGCCCCCTGTTGCACCGACCCCTTCTCACTCGAGTGCTCCGTCGCTCTTACCCACTCCTTCTGGAGGCTCAGGTCGCCCCCATCCACATTGTGGCTACTGCAACAATGATGGTCATATTGAGTCCCACTGCTACACGAAGAACCACTTGCGCCAGGCGCAATCATCATCTATAGAGACTTCGTCATCTACCTCGACAACTTCAGCCATCGCTTTGACTGAGCAGGATATTCTGCGACTTAAGCGTCTGCTCGCTGCTTCAGGTTCTTTCTCGACGGGTACTGCTGGTATTCTGACTCAGGCTTCCCGCACTGAGCAACCACCTCCTACACAGTCAGGACCGTCTCACGCACACTCTGGTTGGAATTGGCCTTCGCCGCCATGATCTTATTTTTTCTCTTCCGCTGCTATCATCTCTAATCTAGTGTGTGTTTTCTAGTTTTCTTTGTTTTCCGCTGCGTCCACCAAATCCGTTGATATTTTGTGTTTTCTCATGCCATGCGAGTCCACCATACCTTAGTCCGTCAGCCTTTCTTTGGTCCTGATCCTTTCTATGCAACTTTTGTGGCCTACTTGCCCTTGTTGTTTTCTATAGGATTTTCTGGACTTCTTTTGCACTGTCGATCTACGTCCATCGTGCCTTATCCACCGAGCTTTTTTTTGCCGACGGTTGTCGTGGACTATGATTTTCCGCCCAATGCTTTATTCTCTTGATGTGCCATCTTCTTTTGGCAACCCATCTTCTCTTGATACTTATCTTGTATCTTCAAGTGATGCGGTGTCTACCTTTGATGTGCCATCTCTTCGTTATCCCCTTCGGCGACTCGACAAGTTTTGAAGACTCTTCATGCTACGACGACACTCTCAAGACACAGATTTGGATTATCATTTTTTTTTGTATTACACTTCTTCAAATGCAATGCTATTGCATACGCTTTGCATTTGAGGGGGGGTGTTAGGAAGTATTAGTATTAGTCTAGGAGTCCTTATTAGTCTACTAATATTAGTCTAGGAGTCCTTATTAGTCTATGTTTACTTTCCTTGCACCTCAAGTCATGTGTAATATATATATGCCCCTTGGGCCTTCAATATAGATAAGTTGCTTTCCTAACAGTTTGGTCTATTTTTCAGATCTAGGTTATGGGCAATATGGGTTGTATTCCTCGTTTTTTAGTCCCGATTTGCGGCATGAGTAGGGTGTGGAAGGTGGCTCGGGAGTAGACTTGATGTTCTTGTAGGAATTTGGTGCTCGTGGCATCCCCGGTAGTACCGGATCTGACCAGTAGTGGTTTTCACCCCACGGTCTCTGCCCTGAGCGGTACTACCACTCTTCCGGGTGGTACTACCGCCCATAAGAGGTAGTACCGCTCCTGGCAGCGGTACTACCGCTCTGGGATGGCATATGCACTTCATTCCTATTTTTCATCACCTATTTCTCCCATTTATTGGTTTCTTGTTGACTCTTGCACATCGTTTACTCTCATGTTTTCCTCTGGTTATGTTTTGGATCTCAGGAGGTGGCAGCTCTGCTCATTAGGAGCGTAGGACGAACCCCAGCCGTGGAAGCACGAAGCGTTACCGTACATGTGAGGCACACAACTCAAGTCAACCGCAGGGGTCTGTTCCTAAGGAAAGTGCTAGCCAGGCTGCTTCCAAGTCTAAGGGGAAGCACCCTGCTGTCAGGCCCTTGAAGTCTCAATCCATGGCCACTCTGAATGCTAAGGACTTCTGGATGTCCCGCAAGGCCTATCCCTATAGAGAACCCCAGGAACCATCAATGCTCAACCGTCCCTTGTGGAACAGGAAGCAACTGTCAGTCTATAATGGCATTCTGAAGAAAAGGGAGAACCTCTATGTTCCACATGTCAAATCCATTGACGTTGAATATTTGCAGTTGAATGTCAGGTACTTCGGGACTGCTCTTTCTCTGTGTGAAAAGCTGGGCATTCTCAACATTATGCAGTTCAACAAAGACTTTAATGCCGAGATTATTGTTGTCTTCTTTGGCACGGTGCATCTGGGAACTGATGAGGACAGGACTTTGACTTGGATGACAAACGTCAGGTTACTTTCTGCTCCCTGAAGGCCTTTATGAATCTGCTTAACATTGAGGACAAGAGACTCGAGAACCCTCTTGGTTTCCGTCTCAGCCTTCGTCAGGAAATCCATGTTGCGCTCTAGTCTGGGCCTTCGTCAGGAAATCCGCCAACTGTAACTCGGAAGGCACATACTGAAGAGCCATAACCTGATCCTGCACACCGGCACGCACATAAAAAGCATCAACATCAATATGCTTGATGAGCTCATGCTTCACAGGATCGCGCGCAATGCTAATAGCACATGTACTGTCAGATAAGAGCAGAGTCGGTGTAGTGATAGAAACACCAAAATCCTGAAGTAACCACCGTAACCAAGTCACCTCTGCCGTCAAAAGAGCCATCGCTCGCAACTCAGCCTCTGCACTCGAACGGGAAACTGCGGTCTGTTTCTTCGTCTTCCAGGCAATGAGAGAACCACCAAGAAAAACACAGTAAGCAGAAAGTGAACGGCGATATGAAGGATCACTAGCCCACGTAGCATCCGAATAGGCCTGAAGCTGTAAAGAACTGGAGCGAGGAAAGAATAGACGGTGAGAGATCGTGCCCCGAAGATATCAGAGAACACGAAGGAGGTGACCATAGTGAACCGAGGTACGAGCAGAGACGAACTGACTGAGAATATGAACCGGATAAGAGATATCCGGACGAGTGACAGCTAGATAGACAAGACTGCCAACAAGATGACGATAACGCGTCGGATCAGGCAGGGGATCACCATCAGTATCACGAAGGTGAACACTAAGCTCCATGGGAGTCTTAATAATGCGCTCGTCGGTAAGAGCAGCACGAGCAAGAAGATCCTGGATATACTTTTCCTGCGATATAAAAAAGTCATCAGAGGTAGAAGAGACTTCAATCCAAAAAAAGTAACGAAGAAGTCCAAGATCAGACATAAGAAACTGCTCACTAAGACGGGCGTTTAGAAAGGCAATATACTCGGGGTCATCACCAGTGATGATCATGTCATCAACATAGAGAAGAAGAGTCCAACCACGAGGAGAAAGATGGACAAACAATGTTGGATCATGAGCACTTGATGAAAAACCGGCGACAGTCACCACAGAGGCAAAACGCTCAAACCAGGCGCGGGGGGCTTGCTTAAGGCCATAGAGAGAGGGACGAAGACGACATGCCATGCCATCAGGAACAAAATACCCAGGTGGTGGCTGCAAGTACACCTCCTCACGCAGCTCACCATTAAGAAAGGCATTCTTAACATCAAGCTGAGATACAGACCAGTGGCGTACAGAGGCCACGGCAAGAAGTGTACGAATAGTGGTCATATGGGCCACAGGAGCAAAAGTCTCATCGTAATCACGACCATGCTCCTGCTGAAAACCACGAGCCACAAGACGAGCTTTATAACGCTCAAGAGAACCATCGGAGCGAGTCTTAACCTTGTAGACCCACTTACATGTGATGGGACGGACACCGGGAGGAAGGGAAACAAGATCCCATGTACCAGTGCGTTCAAGAGCAGTAATCTCCTCTGCCATCGCAAACTGCCATTCAGGATGAACAACAGCCTGACGATAGGAAGTCGGCTCAAGAACAGCAGCACCAGCGGTGGGAAATCCAAGGCGATCAGCAGGCGGACGAGGGCGAGAATGCAAGCCATAGGGAGGCTGAGACGAGGATGACGACACATCCGCAGAGTCATCCACATGACGTGAACGACGAGTGTAACACTGAGGAAAATATGGAACAATGCAAGGAGGGGTCGCCAAGGGAGAATCGGGGGATGAAGACAAAGAAGTCACCGGAGATGAAGGTGCAGAATCTGGTGACATGCGAGGGGAGGAGACCGTGGGAGATGGTGGTGGCAAATCGACAAGAGGTGGAGAAGCAGAGGGAGCGGAACGAATAGGCAAAGGCTCGATGGGGTGAGAGGTGTATCAGGAAAAGTGAGGAAAGAGATATCCTCCACTGAAAAGGTCAAGGAAGATGGGCGTGGGTAGAAGGGACGAGACTCACCAAAAGTCACATCCCGAGAGATACGCATCCGACTACCGATAGGATCCCAACAACGATAGCCCTTATGCTCATCACTGTAGCCTAAGAAGACACATTCAACAGACTGAGCGGTCAGTTTGGTGCGTTCGCGAGGGGCAAGAAGAACATAGCAAACACAACAAAACATGCGAAGCATCGAATAATCGGGAGAACGATCAAAAAGACGCTCAAAAGGAACACCGCCCTGTAGAGCAGCGGAAGGTTGTAGATTGATGAGATAGATGGAGGTGGAGACGGCCTCAGCCCAGAAATGAGGCGGGAGAGAGGCAGCAATCATCATCGCACGAGCCGTCTCAAGAAGGTGACAATGCTTGCGCTCAGCCACACCATTCTGAGCATGAGCACCAGGACAAGAGAACTGAGCAAGTGTACCCTGCTCAGCGAGAAATCCACGCAACATCTTGGAGATATACTCTCCAGCAGAGTCAGCACGGAACACACGAATAGGCGTAGAGAACTGAGTGTGAACCATGGCAGCAAAACGCTTATAGATAGATAATACCTCACTGCGAGAAGACATAAAATAGATCCACGTGTATTGAGAGAAATCATCTATAAAGATAATATAGTAGCGATGGCCTCCCTTCGAGGCAAAGGGAGCTGGACCCCAAACATCCGAGTGAACAAGGTCAAAAGGACGTTGACACACAGTCTCGCTATGAGGATAAGGTAACTGAACCTGTTTACCAAGCCGGCAGCGTTGACAGTCTAAAGACACACCACCGGAGACAGATCCAAGAAGACCACGTCGAACTAAGGATGAGAGATGGGAGCCACATAAATGACCCGGACGATGATGCCACTGTAGAAAAGAGTTGGTAGACAGGGCAACAGAGGAGGAGAGACTGGCTGCGGTGGCAGCAGATGGAAGGTGAAGCCAGTCAAGCTCCCAGAGACCCTGAGAGTCACGGCGCCGAGGGCCAGCACCAAGAAGAGCACCAGTGTGACGGTCCAGAACTGAACATGAGTCAAAGTCAAGAATGACCCGACAACCAGAGTCAACAATCTGGCCACCAGAAAGGAGCTGCATGGTAAGCCGAGGAACATGAGCAACATCGGGAACATGAAAAGATGAAGTGCTAAGAGTGCCTCGGCCAGTAACCGGGAGAGAAGTACCATCAACAGTAAGAACATGAACAGGAGAATCAAGAGGTCGATTAGATGACACAGTGGATGAATCATGAGTCATATGAAAAGATGCTCCAGTATCAAGAACCCACGGAGATGTACCTGCGTGTGTAGAAGGTCGTCTCACAATGCCAGAAGAGTCCGTAGCAGAACCAACAGAACCTGTCGATGAAGAAACAAAAGATGGGGCTAGCAGACATCGAAATCGTCCAATCTCTTGCTCAGTCAGGGGCGCAACTGAAGATGTCGATGTAGACACACCCGACAATGGAGAGTCGGAGGCAAGCAGCAGGGCGCGAAGTCGGCAATCTCGTCCTCGGTGAAGTACACAGCTGAAGTAGGCGGCGTAATGGCACGAGGAGAGAAGCGACCACCACTACCTGTGGAAGCCGCTAAATATGGCGCTGTAGCATGTCCAGTATCGTCGGCAAAGACCGGTGGAGAAGACGAGGCCGTGTGCAGACAAGCACCAAGCGCCAAGGGAAGACGCGTGGACGAAGAGCAGTCCATGGAGTCATGGGCACCAGGACAACCGGTGAAAGTCGCGAGAGGTGTCGGGGAAGAGCGACATGCACCGATGAAAGTCAAGAGAGGAGTCGGTGTAGAGCGACAATCACTATATGTAGAGCTCGCAGGAGTAGCAGAAGAACTACCAGCACAATCGTCAGGAGTCACGGGAAGCAAGGGACTGCAACATTGCGTGCTGGTGTAGACCATTTGGGGGGGGGGGCCAGGGAACAGACGATCCAATCTGGAGAAGTAGACGGCGGCGCGACCTAGAGAGCCTCGGGCCGATCCAATCAGTAGAAGCACACCATGGCGTGACGAGCCTGCCTCGATCTAGAGAGCCTTGGGCCAATCCGGTGCGGATGGAGTCGGGGGCGGCGGTGCAATACCAGGGGCGGCGCGACGGCGGTTGGCGGCGGGAGCAGGAGGAGCTGTAGCAGCGACCTCGAGCGGGAGCAGGGCCGGCGGGAGCAGATGCCTCCTGCTTCGAGTGGGAGCAGATACCTCCTGCTTCGAGCGGGAGCAGAGAACTCGAGCGGGAGAAGAGCCGGCGGGAGCAGAGAACTCGAGCGGGAGCAGAGCCGGCGGGAGCAGAGGCCTCCTGCTTCGATCCGGTTCGATCTAGCGAGAACGAGCGTGACAGCTAGATCTGAGATTGAGGACGGGAACAGGAGATCGAGGCGGAGACTTCGATTGGGAGAGACGGATCAATCGCACGAGTTGCAGCGTGCAAAAAATTGACCTAGCTCTAATCATGTTAGGAATATGCAACTTAGTATTCCCATGAGGCCATAGGCCGATATATATACATGTACAGGTTTGGACTATATGCAGAAAACCACTTATACAACGGGATAAATACAAAGGGTTACATGGCTATATTATATATACTCTAACAGACCCAAGCGGTAGGCCGACGGTAGTACCGCTCCAGGGCGGAAGTGGCCTAGCTAGTTCCGCTGGCTAGTGTTGCTGCCCGTGGGTCTCGACACTTTTCGTGTCGGACTGAGCGGTTTTAGGAGCAGTAGTGCAGGGCGGTAGTACCGCCCAGCGGGCGATAGTATCGCTTGTTACTACTGCGCCAGAAACCCTCGGCACTTCTGGGCTAGGTCCGCAGCATATCCTAAGCGGATATAGGAGGCGGTACTACCTCTTATGAGCGGCAATACCATTCCTGGCAGTGGTAGTACCGCTCAGGCCGTACTACCGGCCCCTGCCTTCCTCTCTGGTTGTTGCCCTCTGCCCCAGCAGTAGTACCGCTCCTCGCAGTGGTAGTACCGCTCCGGCCGCACTACCGGACCCTGCCTTCCTCTCTGGTTGCTGCCCTCGGCCCCAGCAGTAGTACCGCTCCTAGTACCGCTCCCTGGAGCGGTAGTACCGCTCTGATACGGGCTGTGCAAGTGGGTAACGGTTGGATTCATTCCTCCACTATATAAAGGGGTTCTTCTTCCCTGAGAACTTCACCTTTTCCAACCCTAAGCTCCATTGTTGCTCCAAGCTCCATTTTCGCCCAATCTCTCTCTGTAGCCCACAAAACTTGTTGATTCTCTAGGGTTTGCTTGAGAGGGCCTTGATCTACACTTCCACCAAGAGAAATTTGATTCCCCCCACCAATCCCTCGCGGATCTTGTTACTCTTGGATGTTTGAGCACCCTAGACGGTTGAGGTCACCTCGAAGCCATTCCATTATGGTGAAGCTTCGTGGTATCATTGTGAGCCTCCAATTCAGTTGTGGAGATTGCCCAACCTTGTTTGTAAAGGTTCGGTCGCCGCCTTCAAGGGCACCACTAGTGGAATCATGGCACCTTGCATTGTGTGAGGGCATGAGGAGAATACGGTAGCCTTAGTGGCATCTTGGGGAGCATTGTGCCTCCACACCGCTCCAACGGAGACGTACTTCCCCTCAGAGGGAAGGAACTTCGGAAACACATCCTCGTCTCCATCAATTCCACTTGTGGTTACTTCTTACCTTTACTTGTATTTGTTACTTACTTGTTATTATTGTGGCTAGCATCATATAGGTTGCTCACTTTGTTGCATATCTAGACAACCTATTTGTTGCTAAACTTAATTTGTTAAAGAAAAGCTTAAAATTTTGTTAGTTGCCTATTCACACACACACCCTCTAGTCAACCATATCGATCCTTTCAACCGTCATCAAGGACATGTACGATAATGTTGTGACAAGTGGTCAAACAAGTGATGGCGACACTGATGACTTCCCAATTAAAATAGGACTGCATCAGGGGTCAACTTTGAGCCCTTGTCTTTTTGTCTTGCTGATGGATGAGGTCACAAGGGATATACAAGGAGATATCCCATGGTGTATGCTCTTTGCGGACAATGTGGTGCTAGTCAATGATAGTCGGACAGGGTCAACAGGAAGTTAGAGCTGTTAAGCTTCATGCACTAGCCAACACAACCAAAAGTCCGAACTGATGGAAAGGGCTAGGCAATCCGCATATACACTTCAACACCCCCTCTCACGTGAGACGCGGAGAGTCAACACGTGGACAGACTCAGCGGTATGGCTCAAGAGGCCTATACGTGGACAAAGGGGGGCATCAACAATTTTTTAGATAAACTGCGAAAGCCACGACTTGAACTCAAGACCTTAGGCCTTGATACTATGTTAAGCTTTATGCACTAGCCAACACAATCAAAAGTCCGAACTGATGGAAAGGTCTAGGCAATCCACATATACACTTCAACAAGAGCTATGAAGACAAACCTTGGAATCGAAAAGTTTTAGACTTAGTAGAACTAAAACCGAGTACATGAGGTGCGATTTCAGTACTACTGGGCACGAGGAGGAGGAGGAGGTTAGCCTTGATGGGCAGGTGGTGCCTCAGAAGGACACATTTCAATATTTGGGATCAATGTTGCAGAAGGATGAGGATATCGATGAAGATGTCAACCATCGAATTAAAGCCAAATGGATGAAGTGGCCAAGTTTCTAGCATTCTCTGTGACAAAAGAGTGCCACAAAAGCTAAAAAGCAAGCTCTATAGGAGGGCGGTTCGACCCGCAATGTTGTATGGCGCTAAGTGTTGGCCGACTAAAAGACGACATGTGAAATAGTTGGGTGTAGCGGAAATGCACATGTTGAGATGGATGTGTGGCCACACAAGGAAGGACCAAGTCTGGAATGATGATATACGAGATAGAGTCGGGTACCGTCGATTGAAGAGAAGCTTGTCCAACATCGTCTGAGATGGTTCGGTCATATTCAGTGCAGGCCTCCAGAAGCTCCAGTGCATAGTGGACGGCTAAAGCGTGCTGATAATGTCAAAAGTGGCCGGGGTAGACCGAACTTGACATGGGATGAGTCCGTAAAGAGATATTTGAAGGATTGGAGTATCACCAAAGAACGAGCCATGTACAGGAGTGCGTGGAAGCTTGATATCCATGTGCCAGAACCATGAGTTGGTCGCAATATCTTATGGGTTTCACCTCTAGCCTACCCCAACTTGTTTGGGACTAAAGACTTTGTTGTTGTTGTTATTGTTGTTGTTGTTGTTGTTGTTGTTAACTCTGTGGTTGAAAATAAGCCAAGCAAGTAAGAGGCATTTTGAAGACCAGATCCATTTTATTGGAGTAAGACAAGTAAGATGAGCAACTGATATCAGTATAAATCATTTGCATTTTCTCATGTACGCAAACTATGTTATGGGAATAGTCCCGTGGGTAGCAGCCATGTAGCAAGCCAGTAGCAGCTTTGACAACAAGGAGGGGTAAGTAGCCTTGCCACTCATGTTCATTCACTTTGACTGTTTATAGTCTCATGCATTGGTGTGGATGTTTGCTAGAACTTATAACCTGACACTAAGTTGCTCAAAAAAAAGAATTAGAGTCGTATTCCAAACAGGATGTTAATTCTAAAGAATGTTAGTGTTGCCATTGCCAATAAATATAACACGAGTAACAGGACCACGTGAACAAAAATATATATAGATAAATAAATAAATAAAGCCCAGTAATACTCACCAGACAATAGTTCAGCTGAGTCAAATATTTCCAGTTGTTCATTATTGTTGCTATTCAAACACCACAGGTCTGTTGGATAATAGATAGGGATGTTCCTATTATGAGCTATTTCAATGAGTTGTACCACTTCCTTGGTTGCATTTTTTTCTATCAAACAGGAAGGCACTGGAATTCCAAGACCATTCATTATTTGAAATGATAATTTTCCAACAAGAAACAACCCATCGCATTGAGAGGCTAACAGATGCAGTGCAGGTGCCTTTCTCAAGAAGTTACTGCCTCCAATCTGCAATAACCAGAACAATATCAGCAAGAAATCGATATGGCTAAACAGAAATTAAGATCCTCATTAAATAGTTCCTAATAGGAAGTACTAATCCTGCTTGCAGATAGTTAACAGAATACACTTGCTAGGAACAAGGATCATTTCTGCACAATTACCAATTGTGATTAATTATTAAACATCATGAGTGCAATATTCTCGACCACCAACTGAAGTGATCACGTTAGAAAACCCTTTAAACTTACCCGTTATCTACCATGAACATAACAGGACAATACATAGAGCAAATAGTCCTATAAAACTCGAGAAATAGCTTGTACCATCCAGATTTTGACATAGCACCAAACTTTTTGCTCCATTATGGTATAAAACAAGACCAGAAGTACAGATCTAATCACCCACTGTTGGATAGACAAGCTAAACTACATGTTTATACAAGCAGATGCGGGCCAAAATAATTCCAACTTCGCAGTCTGATCATTATAAAGAATAGTAAAAACAGAAGTGGTTGGTGTGTGTGTGTTTAACAAGTCATGGCATCAAAAGAATGATTAGCTTTGTTTTTCAACGTGGATAACAAGAGCAGCTAGATTCAACATTTTTTCCTCGAACACACATCAAAATTCAAAATACATGTCGCTTCGTAGAATCAATATATAATCATTATATAGATGTACCCTTTTTCTGACAGAACCAAAACTAAACCACACATTTACTTGACAATAAAAACAATGGTCAAATCGAGACTGAACACGTTAATTTGCTAGAGCTAATGCTAGTAAATAGGAATTGAACAAGCCCATTTTTCAGGTCTTAACATTGTAAATAGTTTCAGTAGGTATGTATAAACTATGAACTGAAAATAAAACAAGGAGCAGCGATTACTATTGCAATATATGGGCGCCTTGTGGTGTCATTGATCTTTAGCAATTGCATAAGCTCCTCCTCAAAATGGAAACCAGCAAGAGACGCGTAGCAGAAACGAGTGATGCCAACCACTGATGCGCGAATCTTATGAGACAATGAGAAAGAATCATTGACAAAGATTGCTGCACCTGAAGCTAGCTTCTGAGAAAAATCATTGCAGTTTGCATTTTCTCCCCTGAAGTTCAAAAGATTTTCAAACAAGATAATATCATTCTGCACCCATTCTTCCTTCTTACATGATGTTAAACCAGGGACACCATTCACTGGAATGACCTTTACTTGAAGAAGCGATGACATGTAGTCTGATGATCAGCATTTATTACAGATTATTTTCAGTTATCAAGAATGAACAAAAGAAGCTATTCTGAATAAGTAGCTGTATCTGAAATATGTGATTCTGAATACATGACAAAATTAAACATGAGAAAAGATACAAGGGAGAAATGCAGTTGTCCAGACATTTAATACATGGGTGCTAAATATAGCATCATTACTCGGTTTCTCTAATAATACAAATACTTTTGGTTTATAAATAAATAAATAAATTACAGGTTTGGGTTCAAACGTGTAATCTTTGTCAGATGCCCTGGCTTACTGACGTCAGAATCATTATGATGCAAACTGAACAATTGTTTTTGGGTTCTAGAGTGCAACAATATCTAACAACTTATCAGTATAAAGTTTGGCATAAGCATATTAGAATATGAATTTCAAATAACCTGCAAAAGATTCAGTTGACTCGAGCACAGGATTAACAGATTGGAGGACTGGATCCCAACTGGTAACTAGAAGAACTTTCCCTCCTGCTTTGTACAGGTATTTGATAGTTGACAGTGTCCTTTTCAGTGACAAACTACATAACCCAAGAGGATCCAATAGAAGTACAGAATCAAGTCGCACCAAGACCACCTCTCCATAAAGTTTTTCAACTGGGAAATTCCTAAGAGTTTGCACGTGCAGATAAGAAGTTGACCTATCAACACAAGAATATTTGTCCTGAAACAGATATATAAAAGAAAATGTTAGTAGTCCATACTATCAGTGGGTTAACATGTTATGCCTAACACTTATGAGAAGATTCGGAAAGTAAATACTGCTTGACAGGACTACATCATAGAAAATAAACACTTTGTTTTTATCCTTCGATTCAGAAAGGTTCATTCATCCATAGCGTTCAACATGACATAAAACATAGGACATACAAATGCAACATTTCACTATTTTTTTTCCATAATTAACCAAAAATCAAACACGACAGTGATTGATATTCAACTATATTTAGCATTCAGTGCATTCTGGAGTACCTCCTTCTGAAGATGAGCTACATTTCCAGTAGAACGTGGCACCTGACAGCATTGTACTCTACATAACGGTCTTTGACTCCCTACAATAAGAAACTTAAGATTCAGCACAATTAGCCTGGAACTGGGGCAGGGTATTGCACCCACAAATCCTTGAGGAGTCGAGGCTAATCACAAAGATATGAAAAACGAGATAACGCAAAGCATGGTGGGACATCGGGCTCACCAGAGATGCAACAGCTATTTCCAGTACACTCGTAGGATCCACCAAATGGCGGCCATGATTCTCGCCAGCGAGATGTTGCAGAGCTCAACTGAACGCCACAAACCTGCATGAAGCCTTCCTTCTGAAATCTCAACTAGTACTTGGTGCGCCGATG
>HvleckRLK70
CCTCCCCTCCCCTCCGCTTCTCCCTTCCCTTCCCTCCTCTCCTCCCCAAATCCCACCGCCGACGCAGCCAATGCGGGCACGGAGAATCTAGCCGCGTGTCGCCATGCCGCCGCCCTGCCCATCCACCGCCTTCTTCCTCCTCCCCCTCCTCCTCGCCGTCCACCTCCCGCCCGCCGCGGCCGCCGACAGCCGCCACGCGTCCACCACCGCCGCCCCCTCCTACCGCCGCATCTCGTGGGCGAGCAACCTCACGCTCCTGGGCTCCGCCTCGGTCCTCCCGGGCGCGGTCGCCGTCGCGCTCACCACCAACTCCAGCGACGGCATCGGCGCCGGCCGCGCCCTCTTCTCGGAGCCCGTGCGCCTCCTCCTCCCGCAGCCCGACCCGCGCGCCGCCCCGGTGCAGGCCTCCTTCTCCACCCGCTTCACCTTCCGCATCACCCCGTCGCCCTCCTACGGCGACGGGATCGCGTTCGTCCTCACCTCCTCGCGCACCTTCCTCGGGGCCTCCAACGGCTTCCTCGGCCTCTTCCCCTCCGCCTCCGCCTCCGACGACGGCGAGCTCGCCGGCGTCTACACCGTCGCCGTCGAGCTCGACACGCACCGCGATGTGGCGCTGCGCGACCCTGATGGCAACCACGTCGCGCTCGACGCGGGCTCCATCTTCTCCGTCGCCTCCGCGAGCCCAGGCGTCGACCTCAAGGCCGGCGTGCCCATCACCGCCTGGATCGAGTACCGCGCGCCGCGCCGCCGCCTCCGCGCTTGGCTCTCCTACTCGTCGTCCCGCCGACCCGACAAGGTCGCGCTCTCGGTCGACGTCGACCTCTCCGGCCTCCTCCTCACGTACATGTACGCCGGCTTCTCGGCGTCCAATGGCGAAGGGACCGCGGTTCACGTCGTCGAGAGCTGGACCTTTCGCACCTTCGGCTTCCCCAACACCACGCACGCCTCGGCTTCCCCGATTCCTTCGCCACCGCCCAATCCCAAGGACCAGGCGTCGCTCAAGAGCCCACTGCCGCTTCCAAAAAACAACCACCACCACCATAACCTATTCTACACGGTGCTGGGCGGAGCCCTCGGTGGCGTGGTCTTGCTGGTTCTTGTGGTCAGCAGCTCTATTCTATGGATTCGCCATTCAAAGCGCCGCACAGGTGAAAAAACTGCTGTGCTGTTCGACGACAAGAACTTCCGTGGGATGCTGTCCATGGAGGTGGTACGCGCAGCAACAAAGGATTTCGGCAGTGAAAATGTGATCGGCATTGGTGGCTCTGGCGCGATTGTGTTTGAGGGGGTTCTCCCTTCTGGGTCAAGGGTTGCTGTCAAACGGTTCCAAGCTATGTTACCGTGCTCAAAGGCGTTTTTGAGTGAGCTTCGTGCCATGCTTGATTGCCCACACCACCCCAATCTTGTGCCACTCCTTGGATGGTGCTCCAGTGAGCATGACCTGGTTCTTGTTTACGAGTTCATGCCCAATGGTAATCTTGACAGTGCACTACACACAAAGGGTGGAGCAACACTTCCCTGGGAGGCACGGTTTAGGGCGGTGCTTGGCGTTGCATCCGCACTTACATTTCTGCATGATGAATGTGAGCACCGCATTCTTCATCGTGATGTCAAGTCATCAAATGTGCTGCTCGATGGAGACTTCAATGCTCGGTTAGGAGATTTTGGTCTTGCTCGTGTGGTGAGCCATGGCGGGGTGCCCTTGGCAACACAGCCAGCGGGCACACTGGGATACCTCGCACCTGAGTATGTGCATTCAGGTGTGGCATCAGAGCGGTCGGATGTTTACAGCTTCGGAGTGGTTGCTTTGGAGGTGGCCACTGGCCGGAGACCAACGGAGAAGGGAACCGCAGTTGTTGACTGGGTGTGGAGTCTCTGGGGTCGTCGTAGGCTGGTTGATGCAGCAGACCAGCGGCTTCAGGGACGATTTGTCGCGGAGGAGATGCGGCGGGTGCTGCTTGTGGGCCTCTGCTGTGTGCATCCGGACTGTAGGAAGCGGCCTGGTATGCGAAGGGTAGTCAGGATGCTTGATGGTAGTGCACCCATGACACTGGTTCCAGATAAGAAGCCACCAGTTGTACTGAAGTCACCACTAAATCAAACATCGTCAGTGAACACCATGGATACTATCAATACTGCATTTTACAGCTGTCGCTAGACACATATACAAGGTAGGCTTGTAAAGAAGAACTTTCTTATCCATATGTAGTGGTGCTCTATCTGCTGCTAGTTTTGATGTATATGTGATGGTAATGTTTTGTGAATTCTTAGCATTGCACCAGCTATAGGTTGAACATTAGATATGTGTTGAATGTTGCATACTGTTGTTTGGGAAGGTTACTACTGGTGCACTGCCAATGACATCGACATCTTAGGAATTAGGGAAGCTATTGAAAGTGTTGTTTTCTGGTGCAAATTGCAGCGAGATATTTCATAGTTATCTTGGCTGAGATTCAGGTGTCATATATATGAAGATAGTTTTCGTAAATGTTTTCATATCTTACATATTGCCCTGGAAAATTCGAACTGTCATTATCACATATTCATATGGTATTTGGACGTTGCTCCTATTGTAAGCAGTTGTGTTGGAACGATAGCTGGTTTTGTTTTCGCAGGGCACAGTAGCTGTATTCTTGATATAGATATAACATAATTGTCTCGCTGCATTTATTTTAAACTTATGGTATCCGCTGTACACTGTCTACATCTATTGATTCATGGAAGACAAAAGACACAATCCCTTTCCTGTTCTTGTTTTCCTTTTCTTTGAATGATGGTCCATACATTTCCTACTTGACTTGACCCAGCAAGTAGTAACCAGAGTTTTTACCATAATCTGGATTATACACAATGTGGCCTGCTGCCCCATGATTACCTAGACAGTTTTATCCATAATCTGGATTATACGCAAGTCTAAAATTGTCCTCTTTATTGGAAAGTGTTAACCATCACTCCTGGGTTGTAACCTTAGCTGTGTTTCAATGCTGAAAGACTAAAGTATTAGCTGCATAGCAGTAGTACTTACCCTAGCCTGATTGTTGGTTTGAGCTTCCATGCGTAGTTTAAAATTCTGAAATTTCCAGGGATCAATTAGATCAGATTGTTCTTCTTCAGCATTTCACCATTTTTTTTATTCTAGCTGAATCCTTGTGGTCATGTGAAAACAATCTGTGAACTGTGGGGTTGCTATATTACCCGACGCTAGAACGTTGTGCTGCTGCACATGGATGTCCATACTTCACTGTTCCTTTTTTATCATTGTTTTGACCTTTCTGTTGCAACAAGTAAAGCTAGATTTGAGAGTAATGTGGGCCTGTGGCTACACCAGCATGAAGTTTTGATTCCCTGAGCCATCTAATTATTTGTTGAAGCATATTCGCCGTTTGTGCAGGCAACTGTGAGCATAGTGCTCTGTACCACCTAATTATTTGTTGAAAGTTGAAACACATTGGCAGTTTGTGCTGGAAACTTTGAACATAGTGAGTATATCTATAAAACTGTGCTCAGATTGTTTATTCGACGTTGCCCTGCAGTTTTTGGATAAGTTGATAGATTCTGCAGCATGAGCATATGATCTGATAGACTTGAAATTTGTTCCACTGGGCACACTGATTTGTAACCCGAAAAGCAGTATAGATGTCCAGCATTCCCTTCTGCACTAATCCGAGAAAAATACCCCGCCTTTGTACTGAACCAGAATACTTTCGTTCTATTTTCTTAATGTTCTGATCTTTCCCGTGTTCCAAAATTAGAAGAGTCACGTTTGTTATTTTTGCGTTCAGCACTCCAGTATTCATGATGTGGAGTGTATTGACTGATTTCTTGGTTGCATGCTAAGCCTAGATCCCATTTGATTTCGACTTTTGAACTGCAAAAACGTCTTACATTTAGGAACAGAGTTAGTAGTATCTTGGAGTGCCAGTATGCAGCGGTAGTTCTGTGAAGAGAATTAACTGTGGCTGGTTGAGATCTACGGGGTAGTTAAAATCAACTGGCTTTGTGGTGATGAAACTAAAGTGCACGACGACATGTCAATCAGTGTTACTGTTCTCGCTTTGCAGGTACCATGCTTAAAACAAGAGCTTCACACGTGAACCCATATCATCGTCGGCATGGCATGTGGTGAC
>HvleckRLK71
AGTTGTGTACCAATCAAATGGCCTCACTTTTCTCCGGTAGGACCCACCATATTGACCGAAAACCAAACGTGTAATAGACTCTGGTACTATTTGTTCTTAATTTCTTTGGCACTTGCCTTGATTATTCATATTTCATAACCCACCCGGCCATCCCTGAGAGAAAGGCGCCTCCACCATGCTGCCTCGCTACCTATTACTCTGCCTCATCTTCCTCATCCCAGCCTCCGCCTCCTACACCAACGACGGCTTCACCTACGATGGTTTCTCTAGTGGCATGCTCCGGTTTGATGGTGTAGCTTCAATCTCAAGCAGAGCTCTCATGCTAACCGATGGTGTTGCCCAGAGTGTAGGACGCGCTTTCTTCGGAGGCCGGTTTGACTCTATTTCCTCATTCTCAACAACCTTCGTGTTCGTCATCAGTCCTCCTTACTCTGATTTAGGCGGGCATGGGCTTGCCTTTACGGTTTCTGCCACGACGGACTCTTTATTGGGCGCCTCCCCGTCTCAGTACATGGGCATCTTCAACCCTGAAAACAACGGCAATGTGACAAATCAACTCTTTGCCGTCGAGCTTGATACCATCCAAAATCCCGAATTCAGGGATATTAATAGTAACCATGTTGGAATCGATGTAAACACCTTGGTGTCTATCAATTCCCATCCTGCTGGATACTATACCCCAGATGGCAATTTCACTGATTTGCTACTTATTAGTGGAAAACCGATGCAAGTATGGGTGGATTATGATGACAGTTCACACCAAGTGAATGTCAGTTTAGCACCTTACCTAGAGCAGAAGCCTCAGCGCCCACTGCTATCCAATACTATCAATCTTACATCGGTTTTGCCAAGATCAGTATATGTTGGCTTTGCCTCTGCAACCAGCACCGTAAGATCCATACACCGCATTATCGGCTGGAGTTTCAATCCAAATGGGGAGGCTAAACCACTTAACTACTCAGTGTTGTCTGAAATTATACAAGATGTTCGACGCGATGCTCAAAGTCGCTCCCATGTCCCTAAGGGTGTTCTTATACCAGTTATTATTGTGTCGGTGTTCATCACAACTGTTGTTATTGTCGCTATTTATGTTTATATGAAGAAAGCAAGGCAAAGTGGTGATTGGGAAATTGATTGTGGGTCAGCATCCTTCACATATAAAGATCTTGCTGCTGCAACTAACAGTTTCAGTGACAAGATGCTTCTTGGGAAAGGAGGATTTGGGAAAGTGTACAAAGGGCTGCTGCAAACCTCGAAGCAAAATGTTGCCATCAAGCGGGTTTCACCAGAGTCAAAGCAGGGGATGAAGGAATTCATAGCTGAGATAACCATCCTAGGCCATCTCCACCATCGCAACCTTGTGCAATTGCTCGGTTATTGTCGCAACAAGAGCGAGCTCCTTCTGGTTTACGATTACATGCCAAATGGTAGTCTGGACAGAGTTTTGCATGGTCGAGATAAGCAGACTGTAGGCTGGGTTCACAGATTCAACATTATAAAAGGCATTGCAGCTGGTCTTTGCTACCTCCACGAGGATTGGGAGAAGGTAGTCATCCATCGAGACATCAAAGCAAGCAACGTGCTCCTCGACAATGAAATGAACGGTAGATTGGGTGATTTTGGTCTGGCAAGATTACACAACCATGGTACAGATGCCCACACCACACATTTGGCTGGCACCTGGGGGTACATTGCTCCGGAGCTGTCTAGGCTAGGAAGGGCAACCAAGGCAACTGACGTCTTTGCATTCGGTGTCTTCATGTTGGAGGTTGTTTGTGGGAGGCGTCCAATACAAGTGAATGATTCTGATGGTGAGCCAGTGCTGCTGACAGACTGGGTGGTTGATGCATGGGAGAGTGGTTCAATCCTCAATACGGTAGACCCGAAATTAGAAGATTATCTCAGTGAGGAAGCAGAGTTAGTACTAAAGCTTGGCTTGCTCTGCTCACACTCAGCACAAAGTGCTAGGCCATGCATGCGCCTAGTTATGCAATACCTTTCAAAGGATGTGCTACTCCCTGATTACCAGCCAAGTTTTTTGAGCCTTACTAGCAGGGATGAAGAATTTGGGCAGCATATCCTGTCATGCCCATCTGTGGCGGCGACCATGACAGGACTTTCTGGAGGAAGATGATGCATATTTAGTTCTATGGTTTTTGCAATAACCTATGTTTACAGATATACTCTGTTGTCGAACTTTCATCTGAAGGATTAGTTACACCTGAAAACCAAGTATAGCGTTTTATAAACTAAGGGTACAGATAAAGGTTTCTTTTCTGGATGCCTCTCATTTGATATTATTTTGTGGATGAGGCTATGTGTTAAACTTTTTTTATTATACTTTTGTGGATGCAGTTATGTGTTAAACTTTTTTTATTATACTTTTGTGGATGCAGTTACGTGTTAAACTTTTGCTCCCTGGTGTAGTCCCCTAAACTATTTTCTTTAATTTTCAGTGCAAGATCAATAGATATGATGCCCTTTTGGTTACTGTTTGTTGAATGCATAAAGCAATGTTCCCTCTGCGTCGTCTATTTGATGGATGCTGCTAC
>HvleckRLK72
CAGAATTCTCATCACCACAGCTCAAAAGGGTTCTCCTGAGTCCTGACCGAACTACCGTTCAGCCTTACAGACACCCCACCCCAAGTACCTTAGCGAAGGATAGGATACGAGAGCCATGTTTCTCAAGCCTTCCCACATGGTCGCTCCGCTGGTCCTGCTCCTCATGGCCGCCGGTCACTGCTGCCTCGAGGCCACCGGCGGCTATGATGGTTGGCAGTTCGTCCTCAACGGCTTCGCCGGCGCGAACCTGACGCTCGGTGGCACGAGCATGGTCCTGCCGAACGGCCTCCTCATGCTGACCAACGGTGCCACCAGGAAGATGAAAGGCCATGCCTTCCACCCGTCCCCGCTGCCGTTCGGCTCCGGGTCCAACGGCGCCGGCCCCCTGCGGTCCTTCTCGACCACCTTCGTCTTGGCCATCTTCGGCCACGGCCGGCACGCCGACCTTAGCGTCCGCGGCCTGTCCTTTCTCATCTCTGCGTCCTGGGAGGTGCTCTCCACTGCGTTGTCCGGTCAGCCCTTGGGCCTCAGCAACGGCAACCAGAACGCCAGCATCTTTGCCATGGAGTTCGACACGCTCTATAATGCCCAGTTCAGTGACACGAAGAACAAGTACGTCGGCGTCGACGGTGATAGCCTGGTGTCCCTCAATTCCGCCAACATCGGGAACTACGATGACGGCACCGGGCGGTTGCTAAACCTATCTGTGATAAGCTGGAAAGCCATCCAAGTGTGGGTGGACTACGACAGCAAGGCAACGGTGATCACTATGACCATGGCTCCCCTGGGCGTGGTCAGGCCCAAGCAGCCTATGCTGCAGACCACCATCGACCTCTCTGGTGTGGTGCAGAGCACGGCGTACGTCGGATTCTCGTCGGCGATGTGCAATATCACCTCCGGACACTTCATCCTCGGCTGGAGCTTCGCGCTGCACGGCCCGGCCCCGATACTGGACATCTCGGTGATGCCGGCCTTGCCATCGGCATGGACCAACAACAACCAATCCATCCCGCCACCGTCCATGTCCATGTCACTGAAGCTCATGCTGGCCTTAGCATCGGTGACACTGGTTTCGGTTGGCATCGGAATCTACGTCTCTGCAAGACGGCGTATCAATTTCTCCAAGGTGCAAGAGGACTGGGAGGTTTCGTTAGGCCCCAACCGATTCTCTTACAAAGACTTGTTTCATGCGACAGAGGGGTTCAGTGAGAAGAACCTACTTGGGAGGGGAGGTTTCGGAAGTGTCTATAAGGGCGTGCTTGGCAAGCCTGACATGGAGGTCGCAGTTAAGAGAATGTCACATAATTCAAGGCAAGGGGTTAAGGAGTTCATCGCCGAGGTGGTGAGCATTGGTCGTCTTCGACATCGAAATATCACACGATTGTTGGGCTACTGCAGGCGTAAGGGTGAACTTCTCCTGGTTTATGACTACATGGAAAATGGTAGTCTTGACAAGTACCTACACACAAGAAATGGCCCAACTCTATGTTGGTCCCAGAGGTATTCAATCATCAAAGGTGTGGCTTCAAGCTTATTGTATCTACATGAGGAATGGGAGCAGGTCATCATCCACCGAGATATAAAGGCAAGTAATGTACTCTTGGACAACAAGATGAATGGACGGTTGGGTGATTTTGGTCTTGCAAGGATATATGACCACGAAACTGCCGCTGAAACCACCCATGTGGCTGGCACCATGGGATATCTTGCGCCAGAACTCTCGCGCACCGGGAGGCCAACACCATTCTCTGATGTATATGCATTTGGCGTGTTTCTCCTAGAGGTCACATGTGGACGAAGGCCGATCTTCATTGATGAGCAAAACAACCGGGTATTGTTGGTTGAGAGGGTGCTTCAGCACCACCTCAACAACTCAATGCTCGACACGGTGGATCCACGACTCGGAGTGGAATTCAACATGGAGGAAGTCACCATGGTGCTCAAATTGGGTTTGCTATGCACTTACCCGTTGCCCAACGCGCGGCCTATCATGCGGAAGGTCATGCAATACCTCGACCATGATCAATCGCCTCCCGATTTATCACCGGCCTACATAAGCTACCTCATGATGGTACAAATGCAAAATGAAGGGTTTGATTCAGACAACATGCCACGTTCTCGACCCACAGCGAGTGTTGCCACATTATCAGGAGAGTCTTCGGCGACAATTTTGCGAGAGGGAAGATGAAGCATGTATGTAGTTCTCCCCCCCTCTCTCTCTCTCTCTCTCTCTCTCTCTCCTCTCTCTCTCCCTCTCTCTCTCTCTCTCTCTCTCTCTCTCTCCCTCCCTCCCTCCCTCCCTCTCCCTCTCTCTCTGATTTCACTAGTTTTTTCCATTACATAAGTGTTGGTTAATCACTATATCGTATAAGTTCAAGTGGTTAAGAAAATTTCATGCACATAGCTTGGAATGTTGGAGTATACAAGTACTCTCACGAGTTGTTGGCTCGTTGATTAGTCCAACAACCCGTAATTGTGTCCACCAAATGAATCGGACTATAACAACATATTGCGTCTTCATGAACAACTTGATTGAAGGCCAAAAGAGTACATTCACATAATTCCATTGGCTGTGCTCGTGAGTGTAAGTCCCTGACTGAGTACTCGGGAGTCAGGACACATGGCTGGGGCCTACGGCCTACCTGATCTTTTACTGGTGGCATTTTACTACCAGGTACCGCTGTCTTCGATCAACGTCTCGGGGGTGGATCCGCTTTGTACATGGCAAGATCCCTGTCAATCTCCTCCGCATACAGCTGAGGAAAGTGGAATGTTTTTTTTTTTTGTGATTATTTGTAAAGAGATAAAACCATTGAAAGGGGCGGTGGGAGGTGACACGAGAAAAAACCAGATGAAAACACCGGGTATGGGGCTACTAACTCCCTTCTTAGGAGTAGATATTACTCCTATGCAATGACCACCAATCTCTCCCTAATAATAAAGTGCTGACTGCTCCTATTGTCCGTTGTGCCATTTTTACAAAAAAGCCCCTGACATTTCCTGAAATCAACCCATAATCCGGATTTAAGTCAGAAAATGAATCTTTTTTTACATTTTACATAAATTCCCTATATTTAATCGAAACTAACCCGCAGTCCCAGTCCGGTGCAGTCCAAAATATAAGTTGGTTTCAAATTGGGCCTAAAGTTAACTAAAATTACCCACCAATGCCACACAGAAAACGTTTCAAACACAAAAATCTGCAGACTGGGTCGGCCCGTGTAGGCACCTCCTATATTACGCTCTAGGCGTTGGAAAAAGATGCAACACACCTGTTTGGGCCGGCCCATGCTTNNNNNNNNNNNNNNNNNNNNNNNNNNNNNNNNNNNNNNNNNNNNNNNNNNNNNNNNNNNNNNNNNNNNNNNNNNNNNNNNNNNNNNNNNNNNNNNNNNNNNNNNNNCTTTTCAGTTCCATTTTCTTTTTTACTTTAAATAATTTAAACTTTAAATATTTTTTCTCAATTTTAAAAAACTCAGAATTTCGAAATAAAATATTCAAAAAATAATATATTTTTTTAGAATTCAAAAACAACTTAGGAGTTTTGAAAAAGTTTGCATCTATAANNNNNNNNNNNNNNNNNNNNNNNNNNNNNNNNNNNNNNNNNNNNNNNNNNNNNNNNNNNNNNNNNNNNNNNNNNNNNNNNNNNNNNNNNNNNNNNNNNNNNNNNNNNNNNNNNNNNNNNNNNNNNNNNNNNNNNNNNNNNNNNNNNNNNNNNNNNNNNNNNNNNNNNNNNNNNNNNNNNNNNNNNNNNNNNNNNNNNNNNNNNNNNNNNNNNNNNNNNNNNNNNNNNNNNGAACTTTGAAAAACTTTTGCAATTTATAAAATTGAGATTTTTTAAATAAAAGTTTGAAGAAGACATAAAATGTTTGTGAATTTCAAAAATGCTCGGGATTTTTGTAAAAATATTCGCATATTCAGAAAAATGTTCATAATTTTGAGAACAATGTTGGTCAAAACAATAAAAGTCCATGATTTTAAAAAACAATTGTGTATTATTTTTTGAGTGCAACTAAAAAAATGTTTGCTAATTCGAAAAATGTTCATGCATTTCAAGAAATGTCCTAAAATTTTAAAGACATAATATGATCAGCACTATTAAAGATTTTAATTGTTTTTCTTCCGTTGCAACGTACGGGCCCTTTTGCTAGTAGAGAATTAAAGATACAGAAGGAATCAGGTTTGCATCATCTGAACTTAGAATACTTGGACAAAAATCACCAACCATGATTACCCTATAAATAAACACCAAAGATAAACCCCGCGACTAAAAAAGACTAAAAAGATTCAGGCAACTAGTAAGGTGGAATCATCACTCCTCCCTAGAGCCGCTCCGGCAACCGGATGTGGGAACCCTAGCTTGCCGCCTCTCCTCATCCCCTCCGGCCCCCCTCCCTCGCTGACGTAGGGCGAAGCCTGCCCGGCGGTGGCGGTGTCGAGTCTGCTTCTTCCCCACTGTGTATGTTCCATGGTCGGCCGCAGGACGATTGTCCACCGGAGGCGTCGGGCTAAGGCAGGGCTTAGCGGGGCGGGTTCAGGTGTGCATGGTGGTGGCAAGGCATCCCCATGGTGCTTGAAAATGGCGCATTGGTTGCTCGTGCTTGTCTCGGGTGGATCAAGGTGGCTAGATCTGGCATGGGGGCTGATGGAGGTGATGTGTGCGTGCCTCGCTTGGGTCAGGCCTCTTCAGTTGCGACCTGGTCAACGGTGGGCATCACAGGAGGGTATCTATGGGGCTCCTCCTCGGGGCTAGTGGCAGCTACTCCGGCTCTCCACTCGGTAGGCGAGTGGCAGTTAGTGGTCTCGTGTTGATCCGAGATGGTGGCCATGATGGGGCGACACATGGGGTGTCCGGTCAGGGGGGGCTCGTCAGGAGGTATGGGGGCTAGTGGAGGCCCTCCATCGCCGGCACGGGTGTTGGTCGTGGACTCGATCCACTCCAACTCCTCTCCATGTCCCCGTCCTAATGCTACTTGGTCTCCGACCTGGCGTTATTCTGGACAAGGCGGTTGCTGGCGGCTCCGTCAGTGGTTGGGGTGTGAGTATGCCCAAAGCCCATGCCTTAGTTGGTTGTGGGGATGTTGGATTTTAGCGTGGCGGCCCTAACTGTGGGAGGCGCGATGTTGGTGGGCGTTGTCGAAATCGGGGCTCCGCAGACCCAAAGAGGTTCGAAGTATGGGGTGCGCTCGCTCTCGAGCCCTGTTTCGACCTCTCACCTTCACGGCAACTCTCCGGTGGCTCGAGCTAAGGGAAGCAAACTAGAGCACGCATGCAGTTTACCCAGGTTCGTACCAGCTTGTGGTGTAAAACCCTACTCCTGCTTGTATAGATTGCTAGGGGTGGAATATGAGTACAAAGGTGGGTTCTTGCTCTAGTCTCAAAACAATGAGGAGCCCGTCCTTGCTACAGAGGTCGGGCCTCTCTTTTATACTAGCCTTGTTCCTCTTCCTCGAAAACACAATTGGCGGGAAGGGTTGCCACAATGGCCATTTTGAAAGGGGACAGGACCGCGGCCCGCCCTAACAAAGGTGGTCTTCGCCTCCAAAAGCCCTCTTCATGATGCGCTGGTGGGCTCGTGGGTGACCTCTGTCCCGCCGAGCCCCCAGCTCTGGACCCCTTGCACCGGTCAGAAAATCTTTGGGGGTTTCTTTGGGAACCCACAGGTTGACTCGGCTCCCTTAACACCAAAGAGGAAAGCTTCTCTGTTTGTGCCTGTTGGCACCAACCCTGGCACCGTGTAGCGTGGTTCATGTCACCCACGTGAGGGGGTCGGACCGTGCGATCCCAGCAAGCCACCCTTGGTAAGTCTGCCCCTTGGGGGAGGAACCTCAGGAGGCGCCTCCTTCCTGCAAGCCCCGCAGGAAATGCCCTAGGAGACCCCGATGACCAGCGCTTCACGAGGCGAGGCCCACAACACGCACTGGACCCAGGGTCGCACGTAAGCAGGCTTGGGTACCCTCGGGCTGGTCCCGCCGTTCTCCAACTTCTTCTACGCCATACTTTCCCATGTGGTCAACTCCATTTGCTATGTATTTTATTGTAGTTTATTATTTGTTACGTTATTTAGATGAGAACAACATAAATTTCACAACTTAATCTGGTCTTGTTAAATATATACATTACATAAGGATAATTAACAATAAAAAATATAATTTACTCTTAAATCTAGACTAAGAACATCATCGGTGTGAAGACGGCCATGAGAAAAAATGATACCATCGATCCGGCTGGGAGAAAAAGGCCAAGCATGCAAACGGTTAAAGTGCATAACGAAGCATCTTGAATTTCTTGATTTGGCCTTCCATCACATCATTCTTGAGTTGCATCTCATCTATCTGTTGTATCAGTGGTCCAATGGTGTAGTCGAGCAACTCGCTCACATACTTTTGGACGAGATCAACCCATATCCACGCGAAGCAATATTTTTTCCACTGTTTCCTATGGATCACAATATATATACACATATTGATGTGAGCAAAACTAGGGGAGTTGAATAGTGCAAATTATCTCAAAATAGATTAAGATGTATTTTTGGTCATATATGCACCTTTCCACGGTTGGCGCAGATGTAGAACTCTCGCTCTGGATTCTATTTCATGTGTGGCATATGCTTATCAATAGGGCGTGGGCAGCCGCAAAGCAGCACGGGGCCGGTATCTTCGTCGCCGGTGGCGTGGCTGCCGAAATAAATAGAAGCCGCGTTGTTGCAGTGGAATGATGCGCCGAATAGGGCCTGCTGCATTGGTGGTGGGGAGCTAATGGCATAGCCAACAGGTCTAGACGGGAGCTCGGTGAGGGCGGGGTAGTCCCGAACTTTCGAAACACTTCGCCGACCTAGGGTCCATAACTAAGAGGACCTATAATTAGTTAGGAAGAAGAATTGGAAGTAAATGTAATATGAGAACCCATGGACACTAGTTTATATATGCAAAATTTAGTGCTCGCGTTCATAACTAACAAACGACAACACTATATAATACTCCCACCGTCCCAAAATAAATGACTCAATTTTGTACTAACTTTAGTACAAAGTAGAGTCACTTTTGTGTCACTTATTTTGGGATGCAGGGAGTATATATGTGGTGTCACCGCACATCCGATGTCAGCAATATATTCGGACTGATCAACTAAGCAGGGCCCACATTTCGGTGGCATTCCTCTCCGAGTTGACACCAGCACTAACTGCACAAAGCTGGCGAACCAATTCGTCCAACACCATCTCTATTTGAAAAAATTAATGTTGCCGTCGCGTTAAATTCGGGATCCACCAACGTAAGTTGTGACCAGGCCTTTCTCCACTAGTGTGGACGTGTCGGCTTCCTGGTCGTGACGACGGGACGCGACAATGGCGGAGCAGACAATGTCCTCCTTGTCATCGCTCTTACGAAACACCTCGTCCGCTCCCTCGTCAATCTCCCTATATGTGGCATGTAACTTTGTGTGACAGAGGCGGTATCGCCAACGGTCATGACGGTTCTTGCGGGCAGAGTGGTAGGAATCAAGCAACGCCTCCTGCTCTGCTGCGTCCACGTCCCGCGCAGTGGTGAGTTGCTCCTCCGTGCGTCGGTGCTCATCGAGGAGATGGAGGTTGTAGGCCTAATGGGCCTGCGCCGGCCAAAACTTGGCCTCTTGGTCCTCCCGCAGCAAGTTCGTGTAGTGGGCACAAGCATCACCAACGATCATACCGGCATGCAACGACGGGGAGGGTGATGCTGGCTCGTCCTCGGCCATGCCCTCCGTTGGGAGGTCGTTGGCTTCCGTCTGCCTGTTGGCCTGCCAGCCAACAATAAAGGTAGCCATCTCCCTCTTCTGCTCAAACGAGAGTCTGTTCGAAAGGGCTTTGGAGACCGAGGAGGCCATGGCGAGCGTGGTGTGGAGAGCGGAAATGGATCGGAGGAGGATGACTGCGGCTATCACTACAAGAAATATGTCAACTAACGACCTTCAATATTGGTCACTAAATGGTCATTGATTTCCATTTGTGACCTTTTTATGACCAAAAACAGAAGGTCTAAAGCTGAGGGTCTGTAGTGAACTATAACGACCTTTTTTCTGGATTGGTCATAAGATTTTATGACCAAACAGAAGGTCGTAGGTTTAACGACCAAATGATTTGGTCACTAGCAATCTGCCCGTCAGATCCACCGTGGCAGCCTGACATGGCAGAATTATGACCAAATGAAAAGGTCGTAAATAAGATTCAGCCCGGTCCATTCCGATCGTCTACATGGGATGGGCCCAATAATTTGGCCTTTTATTTTCTGGGATAGAATCTTTTACTGAGCAGGTTTTTTATTAGTCCACTTTTCTTTTGGGCCTTGGCCTACTCTTTTTTAGGCCCAAGCCTTCTTAGTCTATTTCTTGTTTGGGCCTCGACCTTTTTGCTGGCCAAACTAACTTTAGTGCCCAAACAAAATGGTCCAAAACAAAACTTAAATAATTGACAACTTCACAGGTGCACAACTTCACAAAATAGAGCAAGACATTGTTTGATCACCAGAATGACCGATCAAGTGGGCTAACTTCATCGGGTTCTTGAGAAGTTAGCCCACTTCACTGTTTCTAGGACAAGTTCTATGACAGGTTCAACTTCTACAATGCTTTAGCGCCGAAGAGAGGCATCAAGTGGGCTACCTTCTCTTCCTGTTCCTGAGACTTCTTGCGCAGCAGCTCAAGTTCCTTGTCGCGTGCAGCTTCATATTCTTCCGCCTTTAGCTTGATTGCTGCCATTTCTTCTTGCATCACTTCAGCTTGAAGCTCTGACCTCTCCAGCTTCTGCTGAAGATCACGAACATGAGCAGCCACAACAGAGTTCCTTTACCAGAGTTCTTACTAGATGACTTGAGACCAACATTCCTGAGGAATGTGCTTTGGTTGACTTCGGTCTTGAGCACTTCTTCAACAATCTCAGCATCAGACTTTGGTTCTTCACCTTCTGGTATCGGCGCGTCCTTCATTTTTTCCATCTCAAGCTAGCATATGGAGGAAAATGATAGACATTAGTGGCAGATCTATTTCACATTCTGCAAGAGAAACCAAACAAGAATGCCACCAAACCAGACCAAGAAATGTATTATTCGAAGTAATCAAACCAGCACACAAAATATATATGTAGATATTTTACTCAAACTCAAACAGAAGTAGATGATAACTACTAAACTTAAAGCATTATTTGAATCTGGCTACAACAAGTGTACACACTTATGTGATCTAGAGACATGCAATCGGAACAATATGGTGGTTCTATATAACATGGCTTCTTTGTTTAGAACTAACATTCAGATAAATTTTCATCATATCATAAAAATGCAACAAATAGCTACAGCAAATTCTGATATCTTTGTTGTGGACTGTACAACAAATTCCGGTATCTTTGTTGAGATATCAAACCTATATTAGGCTCTATCAAACTGCATAAAATCATGGAACATAGTGTGTGTTCTTGCTGGCTGTGAATCAAACAGGGCTGAGGTCTATAGACAAAAGTTTGAACTAGCTGGACAAAAGCATGGAGTGACTTACTATAGCAATCTTGACTGGCTCCAAAAACCCGTGCTTCTTGCTGTTGTGGGTGGCCTTGAACAAGTCAATCGCACACAACTCCTCACCCTTACGCTCTTCTTTCCGAAATGTTTTTCAACAAAAATCAAAATGTTATTCAGCAAGAATAAGAAATGATATTCAACGAGGATCAAACGGTAAGGTCTTTAGAAAAAGGTACTCACAGTGGCAAAAATGTGTGCGGTGTAGTGCTTGGAACCAATTCTCTGTTGGTACACGACCTTTTCTCGATTAATCTTGTTCGACACACAGGTTTCCTACAAAAACGCATAATGTTATTTGCCAAGTTGAAAGAAAGTGGAATAGGCAGTAGTATAGTAGGACAATGCGAGTCTGAGCATATTTGATTTGGAAATATTTCAGCTATCCTGCACTAGCACAAGTACATGAACAACTAGTACTATATAAGAGTTAGTGTATTACATATGGTGTTGATTTTGAAAGTTGATGCTCTCTATTCTTCCTACTCTGATCAGAAACATGGAAGAGGAAGAAGGGGACCATGGCCCATTCCCATCCTGATGTGCAGGACATAAATCAGCAAACAAAGCATATACATACCTTGTGTCTTGGGGTAGACCACATCTGCACCAGAGCTTGCCATTCACCGTCCGTCAGATCTGGCACCGGAGACTTGGTGCTCACTTTGTTTGCTGCTACGGTGTCAAAATACTTCTTCTTGATATTATGGCGTCGATTCTTTGAACTTTTCAGCAGAACATCTTTGCACGCGTACTTGATGGTCTCCGAGTCTGTGTTTATCTCAAAATTTTCCTACCAAGACAGCAAACAAGGAAGGAACAACTTTAGTGATCATTAACTACATAACAGAAAATAGAGTAGCACATTAACTATAAAACAAGTAGCTTAC
>HvleckRLK73
CTCAAATTCTATATCCCGTCCATGCATTTCTATTTCAGTCGGTACACGTCCAACTCGCGACATGGTTCAAAGAATTTTGCTCGCTCCAACTCGGAAGCACCGGTAAAGGGGGAAAGCTCGCTTCATCGCCCTACCTACCGTTCACAAATTCCAAGCACCATAGCCAATAGCCAAGGACAAAGAGACCGGCGAGCTAGCGGTCCTTCTTCGCCGCTGGTGATACGAGAGCCATGCTTCTTCTCGGGCCTTACCACTTGGTCGCCCTGCTCCTGCTCCTCGTCGCTGCGGGCCGCTGCCTCGCGGCCACCGGCCGCGGCGATGATGGCCGGCGGTTCGTCTACAACGGCTTCATCGGCGTGGACTTGACGCTCGACGGTGCGGCCCAGGTCATGCCGAACGGTCTCCTCATGCTGACCAACGGAAGCCTTGGAGTGACAGGCCATGCCTTCCACCCGTTCCTGCTGCCGTTCCGCAACGCCACCGGCGCCATGCGGTCCTTCTCGACCATCTTCGCGTTCGCCATCTTCGGTCAGTACGACGACCTGAGCAGCGACGGCATGGCCTTCTTCGTCTCCGCATCCAAGGAGACGCTTTCCGGTGCGCAGTCAGGCCGGTACTTGGGCCTCCTCAACCAAACCAGTAATGGCAACCAGAGCACCCGCATCTTCGCCGTGGAGCTAGACACGTCAAAGGACGCCGAGTTCCTAGACATCAACAACAACCACGTTGGTGTCGACGTCGATAGCCTGTGGTCGCTCCATGCCACCCCCTCCGGGTACAACGATGATGGCACCGGTTTGTTTCAGAATCTAAGCCTGATAAACCGGAAGTCCATACAGGTGTGGGTTGACTACGACGCCACGGCCAAGGAGATCACCGTGACCATAGCTCCACTGGGGGTGGCCAGGCCCAAGAAGCCCCTGCTGCAGACCATCATCGACCTCTCCGATGTGGTGCAGAGCACGGCGTACGTTGGGTTCTCGTCCGCAAGTGGAAGTATTGTCACTGCAAAACACTTCGTCCTCGGCTGGAGCTTCGCTCTGGACGAGCCTGCCCCTGCACTCAACATCTCGATTCTGCCGGCCCTTCCACCGGCCAGCCCCGTGCGGTACCCCTACAGCACCAGGTTAGCGATATTACCCAGCGGGATTACTCTGCTGGTCTTAGCAGTAATGCTGGCTTTGGCTATAGGCATCGGAATCTACATATGCGTAAGACAGAAGCGTCTCAAGTACTCTGAGGTGCGTGAGGACTGGGAGGTCCCGTTTGGCTCCAACCGATTTTCATACAAGGACTTGTTTCATGCGACCAAGGGTTTCAGTGACAAGAACTTGCTTGGGCGGGGAGGCTTCGGAACCGTCTACAAGGGTGTGCTTCGAGAGCCGGAGATGGAGGTTGCCGTGAAGAGGATGTCACACGATTCAAGGCAAGGGGTAAAGGAGTTCATCGCCGAGGTGGTGAGCGTTGGTCGTCTACGTCACCGTAACCTCGTGCAATTGTTGGGCTACTGCAGGCGGAAAGATGAACTTCTCCTGGTTTATGAGTACATGAAAAATGGTAGCCTTGACAAATACCTACATGGTAGAAATGACCAAGTCCTATGTTGGTCTCAGAGGTATTCAATCATCAAAGGTGTGGCATCAAGTTTGTTGTATCTACATGAGGACTGGGAGCAGGTCGTCATCCACAGAGATATAAAGGCAAGCAATGTGCTCCTGGATAGTAAGATGAATGGAAGGTTGGGCGATTTTGGTCTTGCAAGAATCTATGACCACGAAAACGCTGCTGAAACCACCCATGTGGCTGGTACCATGGGATATCTTGCGCCAGAACTCTCGCGCGCTGGGAGGCCAACACCCTTCTCCGATGTTTACGCATTTGGTGTGTTTCTCCTAGAGGTCACATGTGGACGCAAGCCAATCTTCATTGATGATCAAAGCAATCGGGTGTTGCTGGTCGAGTGGGTGCTTGAGCACCACCACAATGGCTCAATGCTCGACACGGTGGATCCACGACTCGGAGGGGAATTCAACACAGAGGAGGTAACCATTGTGCTCAAATTGGGTTTGCTATGCACGTACCCGTCGCCCAACGCACGGCCTATCATGCGAAAGGTAATGCAGTACCTCGACCGTGATCAATTGCCTCCTGATTTATCACCGGCCTACATAAGCTACATCATGATGGCACAAATGCAAAATGAGAGGTTTGATTCGCACGACATGGCATGTTCTCAGCCCGCGATGAGTGTCGCCACTTTGTCGGGTGAGTCAGTGACAATTTTGCGAGAGGGAAGGTGAAGCATATATGCAATTGAGTCCCTCCCTCCCCCTCTATGTTGATTTGATAAAGGAAGTAAGGGGTTGTATTAAGAAGCTATGCTCTGTTGTTGGACTGCTCCGTCCGGCGTGTCTGAACTTGCCGATTTTCATTATTTAAATGTTGGCTAATCAATGTATGTATAAGCGATTAAGAAATAAAAAATGCTAGACATACAAAGAGTTACATAAGGTTACACGCTGACTAGGATTCTTTCTTTCTAACTAACCACTCCCCCCTGATTTTCAAAGGGGATGGGGCCCTCATTCCCCTTAATCTCCAATCAAAATCCACATCTTTATAAAATCCATGTAAACTTATGTATGTGTAGCATTACTCTTAAAAAATATTTCATGCATAACTTTGAATGTTGGACTATAAAACTACTCTCACAAATCATTGATCAGCTTCATGACATGTAACTGTGTCCACCAAATGAATCGGTAACAACAAATTGCGTGCTCAGGAAAACTATATTCGTTCTCAACGGGCTACCAATAGTCCGTTGAGAATGGTAACTATGGCTCGATAGAAGAACTCCTTCAATAAAAGGACAAAAGTCAATCACGAAAACTATAACCGTTCTTCACCAATCCTTTGACCTTTTACCGAAAGTTAAGTTGGATCTGACCCGGCTGCAATTTTTTTTTGGATCTGACCATTTTGCTTTCGCCAGAGCCCTTGGCGGTAGGGTATAACAACCTATCGCCGAGGCCTCTGGCTGTAGGATTGCACGTTTATCGTAAAAAAAACTGTAAGTTGCGGACATAGTGCGCGCGTGTGCCTATCGCCGGACCCCTTGACGGCAGGATCACATGCGTTACCGACAGCCTCTCCGACGGTAGGTCATTTTCCTACCACCAGGGACCTCGTCGGTAGGTTTTTATACCCTATCACCAAGGGCTCTGGCGGTAGCAAAAGGGTGATATCCGATTTTTTTCTCAACCGGGGTTAGATCCGGCTTAACTTGTGATAAAAGGTTAAAACAGTGAATTTTGCCGATCAAGCTCTGTCAGGTTGAGTCAGTGGGCACATCTGATGCGTGGACGCGCGGTTGTGTGTCATTTGAGCATCGATCGAGCACCTGCGGGTGCGGCAAATTCATGGAGCAGGCTCAGCTTGTGCACAAGGTCGCCACCGAAGGTAACGACCTGCCCGAGGCCGCGCCGCCATGGACGGCTCCGTCAGCTCGGAGACCTCGCCCGGTGTGTTGCTCCTGTCCTTGGTTTTCTGTACGCGCGTGCTACTGTCTGAAACTACATTAGCTCTTCTTGACTAATTTCAGGCTCGCCGCGGAGGCGTTCCACGGCGTGCACGACCAGGCCACGTCTTTGTCCACACTGGCACGCGGCCTCACGCTGCGCGCGCGGCGGCTTGAGGCGGAACTGCCGCTCGATCGGGGACGAACGTCTGCGCCGTCGTCAGAGTGAACAGCCTTGCTTCCTTCACCCACGAAGCCGCCGCCGTTGCTAATTCCAGCTTTGGTACGTGCCTAGCTATGCCTGCACATATCCAGTTTTGTCATCAGACATTCCGATGCACATATACGTACATACGTACTTATTCTGTCAGCAATTTTACGTCGCAATGCAGGCCAACCCGTGCAGCTAAGAACAACCCATTGCAAGCTATCAGAAGACTGAAAAGATTCAGGCAAGTAGCCAGCTGAATGCATGCAGGAGAGGATGTTCACGCTGCTGATATCACCAATGGAGATACTAATGGAGAGCTGTTTTACTCGATAAGGAGCCTGAAGAAAAAAAAGGTCACCAAGAAACACTAAGAAAAGACCCTGTCCATGATGGCTTTTGATCCCTTAGATCAAATCATCTGGGAGGATGTTACGTGCAAGCTAGCAACCAAGCAGGCAAGCTGTTGGACGGTTAACAGTACACGCGTATCTATCCCTTGGCTGGCTAGCTTCAACCGGCCGACGTCCAGCGATTGGATCGATTTACTTTGGCGACAGCGATGAAACCTCACGACGGAACGGAAAAACTGATCGATGGCCAAAGCCTCGTATTGAGCCTTGTATTATTTCATATTGCTTCTCTGATGTTACAAGCAACATTTCTAGGGTGCCTTTTATACACGTTCACAAAGGGACTATGAAAATAGATTAGGACTAGGTATCCTGATACTACTAGACTCGGTTTGGCTTTCTTTCCTAATCCTACGTGTACAAGAGCAACATGATTAACTTCTACATTCACCTCCTTAATCTTGTCTCTTGACTTCACTTCTTGCACTTCGACTTTCTTCCTCATCTCGATGAAGTTCTGTCGACCGAGGGACTTGGTGAGAATATCGGCAAGCTGATCTTTCGTGTTCACATGTTGAACCTCGATCAACCCCTCCTCAGTGCACTCCCGGATGTGATAGAACCGGGTATCTATCACTAGTGGGGACGAGGTCTATAGCCCCGGTTCACCAACCGGGACTAAAGGCTTAACCTTTAGTCCCGGCCCTGTTATAATCCGGGACTAAAGGTGCTTCACATGGGCGCCTCGTAGCGCCCCAGGGGCAGGCCCTTTAGTCCCGGTTCGTTACACGGACCGGGACTAAAGATTTTCAAATTTTGCTGGTTTTTGGGTTTTTTTTGAAAGAAATTATTTTTGGGTTTTTGGGTTTTAGGGTTTAGGTGTCCGGAAGATTAACGTGATGCCTCGTTTGGTGTTCGGGAATTAGTTTTCATATAATTTAAATAGAAATAATTATGCATATANNNNNNNNNNNNNNNNNNNNNNNNNNNNNNNNNNNNNNNNNNNNNNNNNNNNNNNNNNNNNNNNNNNNNNNNNNNNNNNNNNNNNNNNNNNNNNNNNNNNNNNNNNNNNNNNNNNNNNNNNNNNNNNNNTATATATAAGATTAACTTATCTTACAAGCGAGCATATATATACAATTATATGGAGATCTGAATTATCGGGACTAGAGCCCGTCTATTCGATTACATGGACGAACATCAGTAATGGCCCTTAGCTACACTAAATCGTCCTTTGTCATCTATAGCTTCCGTCCTCAGAAATCCCGCAAGCTCCTCTGCAACAGCAATCGCGCGTTGCTCTGGTAGGACCTTCGTCCTCATGGCCGTGTGCTATATAAGAAGAGGAGATGAATATAAATATCAATCATGATAACAAAGAATGACGGGTAAAAATAGAGGTGGGAATGTTCATTGCTTACGTCGAATCTGTGATCCTTGACATCAGAGGTAAACGTGCGAATGGTCTCGCAAACATAGTATCCGCATAGATGCGTTCCTCGTGGCTGCAGGTCGCACTTTACGAGAATAGAATATATATAATCAAAATAATAATCTAGCATCATAAATATATTGAAAATTAATAGAAGTATATCATACTACTACTTACCTGAGCCGCTTTAAAGGTCAGCTTCTCAGAAAAGTTACCGGGAGTCACGCACTTGAACCGCTTCCAAACCCTGCCCGACAAGGATAATGATTTGCTAAGTTTTTCATTAATTGATATATCAGAAAATCATCGAAAGAGACCGATAGAGCGCAAGAATGATTAAAATTATCCTTGGAGCATGTCCTGCAGGCTTTCGAACTGTTCCAAGGGTCTCGATAATGGGTCGAAGGCATCAACTCTTCCCTTATCAATTTGAATGTCCAACAGAATCCAATGGAAGCTTATCAATTACACTTATAAGTGAATGGACACAACAGAGTAAAGACCCTTACCTGAAGTTGTATGGAAACAGTATGTGGTCACAGAAATTTTGATCTATTAGAAACCTTAGAAGGTTTTCCTCCGTCTCCTTGGGTTTATCAGTTAGCGTCGCTATATGTATTTTATCTGGGTCAATAAACCCAATATTTAGGATGGTCTTACTTTTACAATCCAGAATCTTTATTCTGCATAATAGAGTACAAGTTATATATAGACAATGAATTGAAATAACTAAACAAGTTATATGTAGACAACGAATTGAAAAACTTACACACAATAGCAACTCATAAGCGATTTGTCGAGGGCGTTGCCATTGTACATCTGGAAGAGTTCATCAAAGTCGATATGGATTTCTTCGGAGCGGCCGTAATACTCCCGTGGGACACTCAGCACGATCATCGTTCTCCCATTATTTGATTCACTTAAGTACCATTGATGCAAGTAACGCATATTTGTTGGTAGATCATCTTTGCTGACCAAAGGCTCTTCCATGACAAACTATGGCTTAGGGGCTACCACAGCCTTGGGTATCCTGTCGTCTTGGGAAGCCAGCAAATCTTCAACCGAGATACCGCATTCAGCCGCCAACTCCTTTGCTCTTTCAAAAGCTTGCCCCTGCACCGGAGGGGGAACATTCTCGGTTAACACCTTGAGGGGTGGGCTCGACTGTTTGGCCTGTTGTCCAAGCTGAGGAACGTCTGATTTTTTCTTGCTTGTAGTTGAACTTGATTTGCTCCCACTTGCACTTGCACGTGAGCTGCTCTTTTTCACTTCCTTCTGCAATGTGTGTGTATAGTCATCAGGCTTATAGTGTAAGTCATACTGTGATGTAAGGGTTATGAAGTCTTTTGCCCATGCTATTTGCTTCTCGGTGTATTCCGGGCGGGGCTCGGGTTCCTTCTTTTTCATCTGCGCATCATGTTGTTCCTTTGCTATCCTGAAGTTTTCCTCGGGGGTACGATCATAAGGTCTGATAGGAAGATTAGCATGAGGTACCTTTGGGAGGGGCGACCGTTTGCGCTTTGGGGGGCTCCGCCGCTTAGGAATCGTTGGTGGAGCGTTCTTGGTGGCACGCTTCCGCTTAGTATCCTGTGCGGGCGGCGGCGGAGACGGACGACCCAAGTCCGGCGGCGGTGATCGAGATGGACTCGTGTTGTGCTGGCCGACGTCATGTGGAGGGCTTGGAGGTAATGGAGGTGTAGGTGACCTGCGACGACTCGGAGGCGGTGTTGTCCTTGGGGCCGAGCCTGGAAGCTTGATGTAGTTCTTGTCCCATAGGATGACTCCACCCAGTACTTCTCCGAGTGTCCTCTCATCTTCAGGTCCAGCTATGTCGAGCTCCATATCATGAAACCCCGTCATGATTTCATCCACCCCGACTTTAGCAAAGCCAGCTGGAATCTCACGGCCATGCCAGCGTGCATCAGGGCTAGAAGGTAAAGCTTGTCCGACGGCCACCTTCATGGATATGTTCTTGAATTTCTGATGGACTTCACATGATGTTGACTCCTTGATTCCATCCACGGGGTAGCCGGGACCGCCCTCTATCATTCTTCATGCATCGTCGGGCGGGGCCTCAGATTTAGCCACGCTACTTTTACGCTTAGATGGGGCGCCGGTAATATCAAGTGCCGGATCTTCCTGGCGCGCTACTCCTCTAAGCTCATCAATCTGCTTCTGTTGCTCGTTAATCTTGGCAAGCAACTGGTTGAACTTGTCATTCTCCTCATCCTGCTGCCGCTTCTTTGCTCTCTCTCGGCTTCTGTAAGTGTCTTGGTCTCTGGCAAACCCAAGCCACCACGGGTAAGAAGGACCGAAGCCTCGCGTTCGTCCTCCATGTTTGTCATTGCCGAGGACCAGTGTGAGCAAATCTTTATCTCTATCTGCAGTGAACTTTCTTTTTCCCTCCTTAATTTCTTTCACTATCCTTTTCCAATTCTCCCTGGGTATCCTAAGACCGTCATTGCAGATGAGGTCCCCTGTTTTTCCGTCGTACGACCCACGATGCGCAAGGAACGAATTTCTTGCTCTCATTTCCCACTCATCACGGAGTGTTTCAGGTACGATGCCTTTACCTAGCAGATCTTGCTCTTTCTTATCCCACTTTGGGATGGCAGTCTCATAGCCCCCTGGCCTCAGCTTGTGGTGATATTTCTTCTTGTCGGCATTTATCTTGTTCTTTTCTGATAATGCCTGGGCATCTTCTGACTCCTTGTACTCTTGAAATGCCTTCCAGTGATTCGCCTGCTTGGCTAGATACCCCTCGAATACTGGCACTTTCTTTGTCTTCAGATAGTTTTTCCATAGTTTCTTCTTCCAGCTACGGAGCAGTTCGGCCATCTTCTTTAGAGTCCACTGCTTGACTTTGGCCCTCAGTTTGTCTGCGACGTCTTCATTCTCACATTCTGGCAGGTTGAAATGTGACATGAGATCATTCCAAAGATTATCTTTGTACCTTTCGGCGACATAGTCACTATCGGCTGCCCCTTTGCGCTTGTTCCACTCCCGAACGCTGGTCGGGACGTGATCCCTAACGAGAACTCCGCATTGCTTCTTGAATGTGTCAGCAACACTCTTAGGAAGCTTGGGTTCGCCCGTAGGAAATATCACCTCAAAGGTGTAATGCATCCGTGCATCCAACTTTCTAGTCGGGCCTCGTTTCGTAGTTTTGCTCGATGTGGAGGCCTAAGAGGGAGAAACAATCGTCAAATGAATGTATATGTATACAATATAGAGCTATCTCCAATATTTTTCACATATTACAAGTGATTGTCGAACTTCATATGTATACCTCACCGGACTTTATTATTTCTTCACCGGCTTCTCCATCAGTGGAGCTATCACCTTCTCCGTCATTGGACCTATCTCCTGCCCCATCGGCTTCATCTTCGTGTCGCTCGACCTCCATTCCAACGTCGTGGTTTAGATATGATGACGGAGATTCAGCTGGTTCAACGTCGGGGTCGTCTTTGATTATATCTTCGAGAAGTTCTTCCTCTTCGAGGTTCCTGATATGTGGATCCATAGTTCTGCAAAAACCGGATTCTGTTAACCTTTGTACCAAAAAAGAATTATTCTATCAGGAACTCCGTTCCAAAACAACATTGGTCCCGGGTCATGGCTCCACCCGGGACTCCTAGATTTCTGCATAGTATTCAAAGTAGGAGTACTTTTCGAATTTGAGCATTCAATAAGTAAAACCAAATCGTAAAATAAAGTAGTATTCAAATTAGCATGCATTCAATTATAAGCTAATACATCATCTCTTTTGTCCGTACATCGTCGAATATTATCACTAATACTCCTCGAATACTATCATACATATAGCATCACTGATACATCTAGAACCGTAGCGCCCGACGGGTATCGGCGCGGGCCGTGGACACCCAAAGAGAAGGAACCATCACATCATCATAGCTCTAGTGAGATCCCCGAAGAACCTGCCAGGTATGCTCGAACCTGCCCTCCAACGCAACCATGTAGCGACGGACGTGCTCATCCTCCTCGCTGACACGGGGATGTACCACCTCTGCGGTGTCCGGAAGCCTCGGCACCCTCACTGGCCCACGCGACCGCCACCAAACAAGGATCGGGTCAACGACGGGCTGGCTCCTCACCAACCTACGCCCCCCGGAAGGTAGCACCTCCCAATACCAGCCGGGCGGAGCCCAGTCCCGGACAGGGCCCCTCTAATCAAGCAGGTGTCCTCCGCCGAGTCGACGACGAGGATGCGGGATAGGCATCGTACAATGAACTAAAAAAATAAACTAGTTCTATTAATTTTATTGCTAAAAATAAACTATTAACACTTAAGCATATACAATAGCAAAATTAAACTATTAACACTTAAGCATATACAATAGCAAAATTAAGCAATAATCTAAGAAACACTATTAACACTTAAGCATATACACTATACAATAGCAAAATTAAATGATAAAAAAATATATTTCTTCTTCTTGTAACTAAATGTGAGAATGGTTGGGCACCTGAACCATACCTCAACCAAACCCACAAGAGCTAGCTTCAAACCTAAACTAAACCAAACCCACCTGAGCTAACTTGAAACCCAACCAAAACCAAACCAGCTATTTTTCTTACCCAAACTGAACTAAACCAAGCCTCCAACCATGGGTTGGAAATGTTTACAAAAATGGGTTAAGAACTATTCGATCAATGGTTGACATACACTCAACCAAGTACTAAAATTCAGCAAAATTCAGTCATAACGTAAATAGGACAAGATGCAACTGTAGACTCACTATGCATGCCATCACTCGTGCTATTACTACTGCTTCCAGTCCATTGACTGTAAATTTGTGCAGGTAATCCTGGTTAGATTCAAGATCCATCCATAATTTAATTACTTACAATCAGAAGCAACTTCACATGATTCGATTCGATCCATCAGGATTTACTGCTTGCTTGCTTCCGTCATTCACAAGTGAGATGCGACGCACGGACCTGAGCGAGCTGAGCTTCACCGGGGTCTGCCGCTAGAAGGAGGACCTGCAGTTGTTCATGAGGCCCTCGGCGGCCACCAGGAAACCCTCCACGTAGTCGAACCGGCGGCCGCCGCCGTACTGCGACTGGGTGATGAGCCGCTCCTGGTCGGGGCGGCTGGCGGGGAGGAGGCGTGAGTGTGTCGGCCGGCGGAGAGGAGGCGTGCATGCGGCGGCTGGCAGGAGGTCATATGGGCGTGCGATGGACGGCGAAGAGAAAGCCTGCGTGCGGCGGCTGGCGTGCCGGCGGCCGAGCCAGGAGACGCCCTTTTCGTTGGTTTGTGCTTGGTAGGTGAGGAACTAGGGCAATAACCAGGTTGTAACCATAATTTCTAGCCCAAAATGGACCAAATGGTTTAGGCCCATAACCACCCGTACCCAAACTGCTCTCTGTATAAACCAAAACCAAACCAAACTTAAAATCCGTAAGCCCAATATAACCTAAACCAGACAAAGCCGAGTATAAAAACTAAACCATTTAACCCAGTTTTTCTAAAACCATTCTCAGATTTACTTGTAACCCTAAACTAATTTTTCCTCTTCTTCTATTTCTCCTCTTCTTCTACTTCTTCTTCTACTTCTACTTCTCCTCTTCTTGTAGTACTTCTCCTCTTCTCTTCTTCTACTTCTCCTCTCCTCCTCTTCTAATTTTTTCTCTTCTTCTACTTCTCCTCTTCTTCTATTTTTCCTCTTCTTCTCCTATCCTCCTCTTCTTATTCTCCTTTTTCTTCTTTTCTTCTCATCCTCTTCTTATTTTCATTTTTCCTAATCTTATTTTCTTATTTTTGTTCATATTTCTTCTTCTTGTAACCCTAACCTAATTCTAAATATTACTAACCCTAATAATCTAGCACAAACCTAATAACAATAGGAATTAAATGACAAAAAAAATCTTTTTCTTTTTCTTCTTTTCTTCTCCTTTTTCTTCCTTTCTTCTCCCTTTTCTTCCTTTCTTCTCCTTTTTCTTCCTTTCTTCCCTTTTTCTTCTTTTCTTCTCCTTTTTCTTCTTTTCTTCTCCTTTTTCTTCTTCTCTTCTCCTTTTTCTTCTTTTCTTCTCCTTCCCTTTTTCTTCTTTTCTTCTCCTCCTCTTCTTATTCTCTTCTTCTACTTCTCCTCTTCTTCTATTTTTCCTCTTCTTCTCCTCTCCTCCTCTTCTTTTCTTCTCCTTTTCTTCTCCTTTTTCTTCTTTTCTTCTCCTTTTTCTTCTTTTCTTCTACTGGCCAGAGTGTTGGGGAGGAGGGGGCGGGGGGCTTACCGGCCGAAGGTGTCGACGGCGCGCGGCGAGGAGGACGGCGGCGGCGAGGAGGACGATGGCGACGGCGAGGAGGACGGCAGGCGGCGGCGAGCAGGACGACAGGCAGCCTGACGGCGTCGTCGAGTTCTTCGCTGTGCCGCGCCAGGCAGGAGAACGAGAGGAAGAAGAAGAGAAATGGACGATTTGGGTTGGAATTTTTCGAAGTCCCGCTTATATAGGTGGATCTCTAGTCCCGGTGCATGGCTTGAACCGGGACTAAAGACCCCCTTTAGTCCCGGGTGGAGCCACGGCCCGGGACTAAAGCCCCTCGTTTCCCGCCTCCTCGCCTGCCGAAAAGGGGTCTTTAGTCCCGGGGCGTGGCTCCAACCAGGACTAAAGGGGGTCTTTAGTCCAGGGGCGTGGCTCCACCCGGGACTAAAGCCCCTCCTCGGCTGCACGATAAGTTTAGTCCCACCTTGCCCAACGAGGGGGACTAACACTTGTTTATAAGCCCCGTTGCAGCTTCTCCATCGAGCTCCTCTCTAAAGCAGGCTTACGGGCCTAAACTCGAAATTATAGAGAAAATTCAATCTAAATTCAAAGTGAATTTAGATTGAATTTTCTCTATGATTTCGAATATAGTTTCAATTTTTTTTCTATTTTCATAATTAATAATTTTGACTATCCAAACTATTATCTATTTTGTTATTTTCAATTTAAAACTATGTTTATTAAAAATTCTTTTTGCATATTTGAGAATTTGACAAAACTATGATAATGAAAAGTGTTTGAAATTGAATAAATAATGCAAAAATATTTTCTATTTTCAAAAGTAATTATTTTGACTATCCAAACTATTATCTATTTTGTTATTTTCAATTAAAAACTATGTTTATTACAAATTCTTTTTGCATATTTGAGAATTTGACAAAACTATGATAATGAAAAGTGTTTGAAATTGAATAAATAATGCAAAACTATTTTCATTTGACCTAGTTGACCCTGAAATTGAAAAGGACTACAAATGAACTATGAAAATGTTGAAAGTTGGCATGCTATCATCATTTCACCCACATAGCATGTGTTAAAAAGTTGAGAGGGCTATGACNNNNNNNNNNNNNNNNNNNNNNNNNNNNNNNNNNNNNNNNNNNNNNNNNNNNNNNNNNNNNNNNNNNNNNNNNNNNNNNNNNNNNNNNNNNNNNNNNNNNNNNNNNNNNNNNNNNNNNNNNNNNNNNNNNNNNNNNNNNNNNNNNNNNNNNNNNNNNNNNNNNNNNNNNNNNNNNNNNNNNNNNNNNNNNNNNNNNNNNNNNNNNNNNNNNNNNNNNNNNNNNNNNNNNNNNNNNNNNNNNNNNNNNNNNNNNNNNNNNNNNNNNNNNNNNNNNNNNNNNNNNNNNNNNNNNNNNNNNNNNNNNNNNNNNNNNNNNNNNNNNNNNNNNNNNNNNNNNNNNNNNNNNNNNNNNNNNNNNNNNNNNNNNNNNNNNNNNNNNNNNNNNNNNNNNNNNNNNNNNNNNNNNNNNNNNNNNNNNNNNNNNNNNNNNNNNNNNNNNNNNNNNNNNNNNNNNNNNNNNNNNNNNNNNNNNNNNNNNNNNNNNNNNNNNNNNNNNNNNNNNNNNNNNNNNNNNNNNNNNNNNNNNNNNNNNNNNNNNNNNNNNNNNNNNNNNNNNNNNNNNNNNNNNNNNNNNNNNNNNNNNNNNNNNNNNNNNNNNNNNNNNNNNNNNNNNNNNNNNNNNNNNNNNNNNNNNNNNNNNNNNNNNNNNNNNNNNNNNNNNNNNNNNNNNNNNNNNNNNNNNNNNNNNNNNNNNNNNNNNNNNNNNNNNNNNNNNNNNNNNNNNNNNNNNNNNNNNNNNNNNNNNNNNNNNNNNNNNNNNNNNNNNNNNNNNNNNNNNNNNNNNNNNNNNNNNNNNNNNNNNNNNNNNNNNNNNNNNNNNNNNNNNNNNNNNNNNNNNNNNNNNNNNNNNNNNNNNNNNNNNNNNNNNNNNNNNNNNNNNNNNNNNNNNNNNNNNNNNNNNNNNNNNNNNNNNNNNNNNNNNNNNNNNNNNNNNNNNNNNNNNNNNNNNNNNNNNNNNNNNNNNNNNNNNNNNNNNNNNNNNNNNNNNNNNNNNNNNNNNNNNNNNNNNNNNNNNNNNNNNNNNNNNNNNNNNNNNNNNNNNNNNNNNNNNNNNNNNNNNNNNNNNNNNNNNNNNNNNNNNNNNNNNNNNNNNNNNNNNNNNNNNNNNNNNNNNNNNNNNNNNNNNNNNNNNNNNNNNNNNNNNNNNNNNNNNNNNNNNNNNNNNNNNNNNNNNNNNNNNNNNNNNNNNNNNNNNNNNNNNNNNNNNNNNNNNNNNNNNNNNNNNNNNNNNNNNNNNNNNNNNNNNNNNNNNNNNNNNNNNNNNNNNNNNNNNNNNNNNNNNNNNNNNNNNNNNNGGTTTCGAACGAGAACTCATCTCTTACAAAGGGATTTCATTTTTTTGAACTTATTTGAACTCCATACTTTTTGTGTGTTCAAAATGCACCATTCTAAGGCACATCACAATATTTCAACAATTTCTGACTTCATTTGGTATTATTCGTGCATTTACTTATTTTTTTTAGCTAGTTGACCCTGAAATTGAAAAGCACTACAAATGAACTCTAAAAATGTTGAAAGTTGGCATGCTATCATCATTTCACCCACATAGCATGTGTTAAAAAGTTGAGAGGGCTACGACAAAAACTGGCACGTCGTGTACAAAACGGACAATCTCTATCGAAGTATCAGGGTTTCGAACGAGAACTCATCTATTGCAACAAAACGGACAATCTCTCACGAAGTATGAGGGTTTCAAACGAGAACTCATCTCTTACAAAGGGATTTCATTTTTTTGAACATATTTGAACTCCATACTTTTTGTGTGTTCAAAATGCACCATTCTAAGGCAGATCACAAAATTCAACAATTTCTGACTTCATTTGGTATTCTTCGTGCATTTACTTTTTTTTTGACCTAGTTGACCCTGAAGTTAAAAAGCACTACAAATGAACTATGAAAATGTTGAAAGTTGGCATGCTATCATCATTTCACCCACATAGCATGTGTTAAAAAGTTGAGAGGGCTTCGACCAAAACTGGATGCACTTCGTGTACAAAACGGACAATCTCTCTCGAAGTATGAGGGTTTCGAATGAGAACTCATCTCTTACAAAGGGATTTCATATTTTTGAACTTATTTGAACTCCATACTTTTTGTGTGTTCAAAATGCACCGNNNNNNNNNNNNNNNNNNNNNNNNNNNNNNNNNNNNNNNNNNNNNNNNNNNNNNNNNNNNNNNNNNNNNNNNNNNNNNNNNNNNNNNNNNNNNNNNNNNNNNNNNNNNNNNNNNNNNNNNNNNNNNNNNNNNNNNNNNNNNNNNNNNNNNNNNNNNNNNNNNNNNNNNNNNNNNNNNNNNNNNNNNNNNNNNNNNNNNNNNNNNNNNNNNNNNNNNNNNNNNNNNNNNNNNNNNNNNNNNNNNNNNNNNNNNNNNNNNNNNNNNNNNNNNNNNNNNNNNNNNNNNNNNNNNNNNNNNNNNNNNNNNNNNNNNNNNNNNNNNNNNNNNNNNNNNNNNNNNNNNNNNNNNNNNNNNNNNNNNNNNNNNNNNNNNTTCGAACGAGAACTCATCTCTTACAAAGGGATTTCATTTTTTTGAACTTATTTGAACTCCATACTTTTTGTGTGTTCAAAATGCACCATTCTAAGGCACATCACAAAATTTCAACAATTTCGAACTTTATTTGGTATTCTTCGTGCATTTACTTATTTTTATTGAGCTAGTTGACCCTGAAATTGAAAAGTACTACAAATGAACTCTCGAAATGTTGAAAGTTGGCATGCTATCATCATTTCACCCGCATAGCATGTGTTAAAAAGTTGAGAGGGCTACGACAAAAACTGGATGCACTTCGTGTACAAAACGGACAATCTCTCTCGAAGTATCAGGGTTTCGAACGAGAACTCAACTCTTACAAAGGGATTTCATTTTTTTGAACTTATTCGAACTCTATACTTTTGGTTTCGAACGAGAACTCATCTCTTACAAAGGGATTTCATTTTTTTGAACTTATTTGAACTCCATACTTTTTGTGTGTTCAAAATGCACCATTCTAAGGCACATCACAAAATTTCAACAATTTCTGACTTCATTTGGTATTCTTCGTGCATTTACTTATTTTTTTGACCTAGTTGACCCTGAAATTAAAAAGCACTACAAATGAACTATGAAAATGTTGAAAGTTGGCATGCTATAATCATTTCACCCACATAGCATGTGTTAAAAAGTTGAGAGGGCTTCGACCAAAACTGGATGCACTTCGTGTACAAAACGGACAATCTCTCTCGAAGTGTGAGGGTTTCGAACAAGAACTCATCTCTTACAAAGGGATTTCATATTTTTGAACTTATTTGAACTCCATACTTTCGAACGAGAACTCATCTCTTACAAAGGGATTTCATTTTTTTGAACTTATTTGAACTCCATACTTTTTGTGTGTTCAAAATGCACCATTCTAAGGCACATCACAAAATTTCAACAATTTCTGACTTCATTTGGAATTCTTCGTGCATTTACTTATTTTTTTTGAGCTAGTTGACCCTGAAATTGAAAAGCATTACAAATGAACTCTGGAAATGTTGAAAGTTGGCATGCTATCATCATTTCACCCAAATAGCATGTGTTAAAAAGTTGAGAGGGCTACGACAAAAACTGGCACGTCGTGTACAAAACGGACAATCTCTATCGAAGTATCAGGGTTTCGAACGAGAACTCATCTATTGGAAAGGGATTTCATTTTTTTGAACTTATTTGAACTCCATACTTTTTGTGTGTTCGAAATGCACCATTCTAAGGCACATCACAAAATTTCAAAAATTTCTGACTTAATTTGGTATTCTTCGTGCATTTACTTATTTTTTTGACCTAGTTGACCCTGAAATTAAAAAGCACTACAAATGAACTATGAAAATGTTGAAAGTTGGCATGCTATCATCATTTCACCCACATAGCATGTGTTAAAAAGTTGAGAGGGCTTCGACCAAAACTGGATGCACTTCGTGTACAAAACGGACAATCTCTCTCGAAGTGTGAGGGTTTCGAACAAGAACTCATCTCTTACAAAGGGATTTCATTTTTTGAACTTATTTGAACTCCATACTTTTTGTGTGTTCAAAATGCACCATTCTAAGGCACATCACAAAATTTCAACAATTTCTGACTTCATTTGGTATTCTTCGTGCATTTACTTATTTTCATTTGACCTAGTTGACCCTGAACTTGAAAAGCACTACGAATGAACTCTGAAAATGTTGAAAGTTGGCATGCTATCATCATTTCACCCACATAGCATGTGTGAAAAAGTTGACAGGGCTACGACAAAAACTGGATGCACTTCGTGTACAAAACGGACAATCTCTCTCGAAGTATCAGGGTTTCGAACGAGAACTCAACTCTTACAAAGGGATTTCATTTTTTTGAACTTATTCGAACTCTATACTTTTTGTGTTTTCAAAATGCACCATTCAAAGGCACATCACAAAATTTCAACAATTTCTGACTTCATTTGGTATTATTCGTGCATTTACTTATTTTTTTTAGCTAGTTGACCCTGAAATTGAAAAGCACTACAAATGAACTCTAAAAATGTTGAAAGTTGGCATANNNNNNNNNNNNNNNNNNNNNNNNCCCTAATGCATAACAAATATCTAGCACAAGGAGAAGAAGGAAAAGCGACCCCCACAACAAAAGTGGTTCCGTGGCACGCCACGTGGTTCCACTGCACGCCACGTGGTTCCGTTGCACGTCACGTGGGACTAATGGTCTTTCATTTTTAAATGACTGTTTTAATCAAAAACAGATCTGTTACAAAAGGGATTTCATTTTTTGAACTTATTTGAACTGAAGACCTTTTGTATATATATGTGGTCAAAATGCATGATACCATGAAGTTAGAAAGGGCTAAACCATTCAAAAGTAGCAAATGAAGTTAGAAAGGGCTAAACCATTCAAATTTGGAAACTATAATGGCACAAACAGAAACTAGACATATATAAATTGGTCCAAGCAGTACATGATACTAGTCCAAACAGTACATAATAATAGCTACCATAGATATATATACAAGTGTTCGACGTTCAGAACACTACTCGTCTGAATCGTTTGAATCAGAATGTCCACCTTCCTCGAGGTGACGCTGGCCATAGTTGACGACTCGAATCTTGCGGTACAACTCGTATGAAACGTATGCATCTTTTGCTGCATACTCAATGTTGATAGGATCAAGTGGGGCCTTCTCCCAAAGTTTGTGCTGAGACTTTGGGAAACTGGTCTTCATATCACCATATTCCTCGTCGATCAAGGCAACTGCCATATGAGCCATCGAAGTCCTGTCATGTCGAAGCCTGAATATCGTTTGGAGATCAACGAGGCAACCAGTTGGTATCTCAATACCGAAGCTGTACCTCATCTTAAGCTTGTCGTTCCTTATGTCAACGGTAGCAAAAGTGATGCCGCTGCGAAGGAAGTCCATGAGTTCTGGACAATGCTTGTCACTCCTGCAACAGAAACAAATTAAAATGGAACAAATGTTACATACTGCTGCAATAAGGAAACATGTTTCACTACAACTAAAGAGAAAATTATCTTTAGGATTCAAATAGAACATATGCAATGGAACCTAGAGAGATCACTATAGCTATCCAATGGAACCTAGAGAGATCACTAGCTATATGCAATTTTCATGACTATGACATATCATATTGCTATCCAATGGAACCTAGAGAGACCACTAGCTATATGCAATTTTCATAACCTTGGATCAAAGAACACCGCATAAAATTGTATCACTACAACTATGATTTGAATGGAACATATTGAACCAATCAGATTTTTCAGATTGTGGAACACTATTCCAATGAGATTGTGTTCCCTTCAACTAATCAAAATTGTTTCACTACAACTATTTGAAACGAACCAACTATGATTCCAATGGAACATATTAAACACTAGTTGATTCTAATACGATTTTTCAGATTATGGAACACTATTCCAATCTGATTGTGTTCCCCTTCAACTAATCAAAATTGTTTCACTACAACTATTTGAAGGGAACCAACTATGATTCCAATAGAACATATTAAACACTAGTTGATTCTAATACGATTTTTCAGATTATGGGACACTATTCCAATTAGATTGTGTTCCCCTTCAACTAATTAAAATTGTTTCACTACAACTATTTGAAGGGAACCAACTATGATTGAAACAAATAAACTTATAATGTCATTATCTTGGATCAAAGAAAGCCTCAAAACTTACCTCGCCCATTGGAAGATCAAGACATGGCGTGCGAAGCATAGCTGGATGACGGCAACACCGCGTTGATCGGCCGTATACTCTAGATCAAGCCCCAAGAACTTCTCATGATCCATTGCGTCGTCAAGCCATTTTTCCTTCAACTGTTCAAGAAAAAAGGCACCTCCCTGCTCTCGTTCGTGTACACGACATCGAGCATGGTCGTGCCATGTGCGAGCACCTTATGAAAGCGAGTTGGCATGGTGAAAGAAGAGAAGGGAAGAAGAGAGGAGAAGAACAGAGAGGGAGAGCGAGAGAGAAGAAGAAACAGAGAAATGGCGACTGTGCTTCGGTTCGTGCTTTTCATCGCCCGAAACGATGCGGGATGCAAACCGTTTGGGTCTTTAGTCCCGGATTGAGCCACCAACCGGGACTAAAGAGTTATACCAACGGTTGCCACCACTACGGCAGGCCACGTGTTAGTCCTTTAGTCTCGGGTTGAGCCACCAACCGGGATTAAAGGGGGATACAAACGGTTGCCACCACCACTGCCCGCCGCGTAGCCCTTTAGTCCCGGTTTGGGACACGAACCGGGACTAAAGGCTCCTTACGGGCCGGGACTAAAGCCTCGAGGGAGGCATTGAGAATTGGGGCGACGTGGCCGGGCCTTTAGTCCCGGCCCAGAGGCAGGCCGGGACTAAAGGGTCCCGGCCAAAGGCCCGTTTTCCACTAGTGTATGTGCTTGCTCCTTTCGTGATGAACCGGATTTTTGCACAATGAGATTGCAGCTTGGTTGTCAATCTTCAATGACACCTTCTGCACCTCCCGCTTTGGAAAAATAGCTAGGAGTTTTCTCAGCCACACTGCTTGACAAGCTGTTGTGCTAGCCGCTATGTATTCTGCCCCGCATGAAGACAGTGCCACCACCTTCTGTTTCTGGGAATTTCAGCTAATAGGATTCGGACCAAGGTAGAATACCATGCCTGTTGTGCTTTTCCGGTCATCCACGTCACCTGTCATGTCACTATCTGAATATTCAAGAAGGATCAATCCTTCCTTTTCTTTTCTGTGCGTGCAATCAAGATTAATTGTGCCTTTCGTAGAACGTAGGATTTGATTGACCACGTTCGTATACCCCGTATACCCCTAACGATCGAAACACGTACGTGCAAGCTAGACAAGCAAGCAACGAGCAAGCAACTAAGCAAGCAGACACATAGATGGATCGGTTGCTGTTGGACACTCACGCACGAGTAGCTAGCTTAATCAGCTAAGCTAGCGATCATCTCGCCGGCGCTTAATTCAATCACAACAGAACATACACGCGAGCACTCGAGGTGATGGCGAACATGGCCGTGTCGGTCCTGTGTTTTGTATTACTTTTCGTTTTTCTAAGCAACATCCCTAGGGTGTCTTTGATACACATCCACAAGGGACTATGAAAATAGATTAGGACTAGGTGTCGTAATACTATTAGGACTTGATTTGGCTTTCTTTCCTAATCCTACGTGTGCAAGAGCAATATGATTAACTTCTACAGTCCACAATCCGAACGAGAATTGTGGTTGTTTGTGCATCGGAACAGCTAAGAAAAATACCTCCTCTGTCAGTGATACGCCCTGAACACTCTCTTCCTATAAATGTAGTAACAAGGTATATTCAGACTATTGTGATAGAATTGTGACCATTTTGCACAGGGCTGGTCACACTCGTCAGGTAACAAGACAAGTTCAGCTACGTTTCCCATTCGAGCGAAACAAATCAGTCATGAATTTCTGATTGTTCATCGTAAAATCAGGCTCACATATACGGATGACGAGAAAACTATAGCGATGATTGATACCTTGGAGTGACAGCAAGGTAGAAGACGCTAGCATGAGACTCACCAATAATTTGACGATCAAATGAGTAATGACAAGAACTTTTCCCTCGAGTGAGCCCGGTCGTCACAAGTGGTCAAACATGTCATATACGCGTTACATACACTCACTCAGCTCAACAATAGCGCGTTTCCAGGACTCAAGAATGACAGCAGGTTGCCGACGACTGCCGGTCTACTCACGTCTCAAGAACGACGACTTGATACTTCACAGTGCAGTCTCAAGACTTTATAATAAGACAGCAGAGCAGAGAGCACAATTTCTGGACAACATCGATTTCGTCAGCCGGTAGCCAGAGACCAGCCTGCGGTCCTTCGCGCCACACTGCTACCATGCTTCTCGAGCCTTACCCGCTTGGGCTGTGTATGTAACTGATTTCTCCAAATCAACTCATGACCTCAACTAGATCATTTTCATTGTCACCATATCCATGTGATCCAAAATTAGCCCGCGGAGCTCTAGTACTATTGTACGAATTCAACCTTTCATAGTGGGCTGGATTATGAGCTATATTGTTTGAGTTATATTACACTGTTTAAGCACTCCCTCGTAGATTTGACTCCTGAGCTCAGCTGCATCCGCGTCGACGAACAAAATCAAAACAAATAGTAGAAACATTAAAAAAATTCCAGATATTTTTTGTGTGGTAGATAACTTGATGCGCGAGGTCCGCTTTAAATTTCAATTTATTTAGACATGTGAGCAGCTCTCAGCAAAAAAGATAAATCGGGTTTGTAAAAAAGGTTAGGTGTTCACAAACTGTTCTGATTCAATTTTTCTTTTTTGCCGAGAGCTGCTCAGATGTTCAAATAAATTAAAATTTGAAGCGGACCTCACACATCAAAATATCTACCACATACAAAAAATTTGTATTTTTCTGATTTTTTTAATATTTGTTTTGATTTTTTTCTGACCGGAAGCAGATGAGCCCGGGAGCAGGCTTGAATTTTCACTCCCTCGTCTTACTTTTCCTTGATAAAATGTCTATATATCTCATATGTTTAGTTCTATGATGTCTGACTGGATTATTCACTATATTGATGGTAGCTTAATTTTTCACAGTAAAACTAGAGTAGTTCTGTTAATAAAAAAATCATCCACAACAACTCACATAATCCTAATGCAATTGACCTAAAGTCATCTTCTATCATGAAACTTGCAACGACACTTTGCATCTTCTATCATGTAATCTTTTTTTTTTCAAGTCAAAAAAAGAAAGATTACCACCAAAAAATACACAATAACCAGATTTGGACCATCTATCATCTAAGTTACTAGCCCGAGTCAGCAACAGCATATCTCTCTATTATCAAATTTCCATAAAAAAAATCTCTTCTCCACGACAGCCCTTAAGATATTGGAGGGTTCTGTTTACCTCATATGAATGGCTGAATCCAGGAACAACCTGTGCAAGCAAGAACTCTCACAATAAAGTTACCTCTGAAGAAGTGGCTGATCTAGAGGAGGTTGCATTGGATTGTATTAACATTAAAGAAAAATACCGCCGCTACTGCCCCTTCCTCTGACCCAGTTGCTATCTGCCAATGAACATAAGGATATGGGCTTGCATTATCTCAAATAAAAATACTTGAACAAAAATCACCATGATAGATCGTGCAGCTAATAACAATTGACAACTTCGCAAGCTGTCAGAAAACACAAGACTGAAAAGATTCAAGCAAGTAGTCAACTGAAAAGATCCAGACAAGTTCATGCTGATATCATCCATGGAGATGGGGCATGCAGAGATATCATTTTTTCCTTTTCTTCATAAGGAGCCTGAAGATGCTTTTTTTTAGTAAAGAGCGTGAAGATACTGTTGAGTAAATAGGCAATTTTCCGAGTATATTAATCCACGAGATAATCACTAGCATGGCATTGGCTAGAGTAATGATATACTGATCTTGAGCTAACCTAGCACATACTACGCATATAGTGGATACATCTATGCAGACAAGCAGTACTGCTAGGATAAATACGAACATGAGGATAAACGAGTCATACGCTCCAATCGGCCAGTTGGCCGTAGCAGCAGCGGCAGCGGCGGCAGTATCCTCTGCCGCCTTCTTCTCGGCTTCGGCCTTCTCGCGGAGACGGTCAGCTTCGCTTGGTGAAGACATGGCGATGACGAGGGCGACGCGGATGTAGACGAAGCAGACGGATGGAGGCGAGCANNNNNNNNNNNNNNNNNNNNNNNNNNNNNNNNNNNNNNNNNNNNNNNNNNNNNNNNNNNNNNNNNNNNNNNNNNNNNNNNNNNNNNNNNNNNNNNNNNNNTATCTCTCCGTCACACGGAGTGACAAATCCCGGTCTCGATTCGTACCAACCCAACAGACACATTCAGAGATACCCGTAGTGCACCTTTATATTCACCCAGTTATGTTGTGACGTTTGATACACCCAAAGCACTCCTACGGTATCCGGGAGTTGCACAATCTAACGGTCCAAAGCACTCCTACGGTATCCGGGAGTTGCACAATCTCATGGTCGAAGGAAAAGATACTTGACATTAGAAAAGCATTAGCATACGAACAATACGATCTAGTGCTAGGCTTAGGATTGGGTCTTGTCCACCACATCATTCTCCCAATGATGTGATCCCGTTATCAATGACATCCAATGTCCATGATCAGGAAACCATGATCATCTATTGACTAACGAGCTAGCCAACTAGAGGCTTGCTAGGGACACATTGTGATCTATTCATTCACACATGTATTACTGTTTCCTGTTAATACAATTATAGCATGAACAATAGACGATTATCATGAACAAGGAAATATGATAATAACATTTTATTATTGCCTCTAGGGCATATTTCCAACAGGAACCTCATAGAACCGAGTCTCTCTCGTCACCTCCATGACGCCCAACAGTCTCCACTTGCACTAGAGTCAATAATCTAGTTACATTGTGATGTATTGAACGCCCATAGCATTATGGTGCTGATCATGTTTTGCTCGTGGAAGTGGTTTAGTCAACGGGTCTGCAATATTCAGATCCGTGTGTACTTTACAAATATCTATCACTCTGGCGTGCTCCAGGGTTGGGTCCCGGAGACTCTGACTGGGCTTGACCGGGGTCAAGCCGGGTCTGCTACTCGTTGGCAATGTCAAGCAGATCCTTGACCCACTTCTCCTAGAAGGCGTGCTCCTCGCCCTTCAAGCTTGGCATTTCTGCCATGGCCGCCTGTGCCGCCCGCAATTGGCTGCAGGAGTCTCGTAGAACCACTCCAAGGTCGGTGATGAGCTCCTTCATCCAAATTCCTTCATGAGCTGCTTCTGAAGCAGCTACGTACTCCGCTTCACATGTAGATGCTGCCACGACTTCTTGCTTGCTGCTGCACCAGCTCACTGCCCCACCATTCAACACATATACATATCCGGTTTGTGACTTACGTATGCGGAGTTATACTCGGGCTGCGTGGCCTCCATCTGGCGCTTCGCCGAAGCGATGGTGATGCCCTCCTCCAAGATCTGCGTGCGAGCCTCCTCTAGCGAGGCTCATGCGTCGTTAGGGTTTGTGAAGGCGGCGATGGGCGTCTTCAGGCCGGTAAGCGCAGCTTGAAGAGTGTGAGCAGTGACAGCAGCAGGATCAGCAGCGTCTGCTGACGCTTTGCCCAGAGCCGTGCTGGTGCTGGCGCCGATGACCATCACCTCCACGACGTTGGAGACGGTGGCGACATGGTATGGGGTGAAGAACCCCACCGACGGTGGAGGGCCATCGAAGACGAGTACGTTGTTGGGGTACACGTCGTGCGTAGGCGTCTCAGCGATATAGAGCCTACTGAAGCTGGCGCACAACGCCTCGACATCGAAGTCCGCACCAAAGTAGCGAGGACCGTCGTTGAGGCGCAGGTCGCTAAAGAGAACGCTGAGGTTCTCCATAGCATCGACGACGATGCTGGGGGGCGCCTCGTCATCGGTCTCCTCATCCGAATCCGCATGGCGGACCGGGACGTCGATCATCATCGGTGTTGCCTCATCGAAGGCGGGCTCCACGGGCATGCAGATCGGTTCGGACGCGATCCCGCGATCGGCCCCATGGTGGGCGCCAAATGTCGGTGAATACTCACAACATATGCCATGGGTAGGCTAAAGAAGGTTGGAACCAAAGTGGCAACGGAGGGTGCTGGGGGCGAGGTTGGTACAAGCATGGAACACACGATGTACCCAGGTTCAGGGCTCTCCGTAGAGATAATACCCCTAGTCCTGCCGGAGTGTATGATATGTATGGATGGGATTACAGGGTTGCTCCTGGAGTTGTATTGCGGAGGAGGAAGAAGGAGCAGCTGGCTCATCTCTGCCTCTCCTATGTGGTTGGTGAGTGTATGTGTGATCAGTTGACTGACCCTCTGCATGGAGGGGGTCGGGGGGTTTTATAGACGAACCCACCGGCCTACAATATGGATAAAGGGTACAAGAGTGGGACCCGGCTGGCACCCTCGCCGGCTGGCCAGGGGGCCCACGAGGGTCTTGTCTTGTCGCTTGAGGGGCCCGTCGGATGCGAGGTCCCATCTGGCTGTTGGACCCGCCGACTAGCCAATGAGGCTCTCGCATAAGGTTGACGCAGGACACCCGTGGTACGTCCGCCGTCGTCCAGCGAGATTCATCATGGGCAGACGGTACGACCGCCTCCACTATTCCCACGCCGAGTGCAGAGCGAGATGCATCATGGGCAGACGGTACGACCGCCTCCACTATTCCCACGCCGAGTGCAGTAATGGAGTGGGAGTTTGACGGTCGACACTGTGTTGGGTGATGGATCAAAGCCGGGGGAGGTCAGCGGCATGTCCGCCGATGTTGGTACCCGTCGTGCACTCCGATCCAGTATTTGCTGATGCGTAGCCACCTTTAATCGTAGGGTATCGTCATGACCTATGATCTGATGTGACTTGAGATCTCCTGCCGGCTCACCTGTGTGGCTAGCCGGCCTGGGTACGGCCGCCTCGTCCCTAGTCGACTGGCCTAGCCTAGGCGATCAGGGAGAGGTCGCCGTCTTGCTTCTAGCCGGCAGGGGATGCGTGGCCGGCCAGAGAGTTGGCCGTCTCACCCCCTCGCCGGTAGGTGTAGCCTAGCCGGCCAGAGGAATTGGGCCTTGTAGAATGGTTCTTGGTCATTCCTTTGGGGCCGGAGATAAAGGAGCAGGCTCGTTGAGCCTACCCCGGGGTTATCCNNNNNNNNNNNNNNNNNNNNNNNNNNNNNNNNNNNNNNNNNNNNNNNNNNNNNNTCCCCTCGACAGTAGTCCCCGAAGCAGTAGAGGCCCGCCGCCTTCTTGCGGGTGGTCTCACAAGCTTGATTTTTTGTCATTGTATTCCCGCCGCCACCTGCTGTAGGGGTCGCCGGCTGGCTTCGAAGCAACGCCTCGCCTTCGCCGTAGGCTGCGCAAATCGCGCCACGTGTCAGGCCCGGCCTGACGTGCTGACGGTTTTTACTAGTGAGGGGACCGTGCCTGGGCCCTGGGTCCCGCCACGACGCCCCGTCGACCGCGCCGCGGAGGATCCTTTGCGGATTTACTCCGCGGTGGTTGGGTTTCGGGAAGCGCTACCGCCCGTAATACACGGGATTAGTGGGGCTCCGCACGCACTGGATCCCCTCCCCATGATCGTTCATGGGGTTTAAATGGGATGCGGGGGTATCCAGGAGGACATTCTCCCCCTTCTCGCCCCGCATCGAAGCCCTCTTCCTCCCTGAGCCCAGAGAGAAAGAACCTGTCCATCTTCGTCTTCTTCCTCTCAGTCGCTGTCNNNNNNNNNNNNNNNNNNNNNNNNNNNNNNNNNNNNNNNNNNNNNNNNNNNNNNNNNNNNNNNNNNNNNNNNNNNNNNNNNNNNNNNNNNNNNNNNNNNNAGTTTTGGACAAGGACACATCTCAACTACTATGCCTCTGTGTTGTGTGGAAGAAACAAGATTTTCCAGCACAGGCATATTCCTCATGTTGAGCTTGAAGAAATACCATGCTTTGCTCCAATCCTCAACGTTCTTTTAGAAGTTGGACTCCTCCCAATGTGCTCGGATATCTGTGATTGGAATAGTGAGCTCATTCTTCAATTCTATGCAATTCTTCACATCTCAGGAGATCCAACAGACATCAGCACATGGGTGCTAGATTGAATGACGCAAGCCACACACTTCAAGGCTCCTGCCAATGAGCTACTGCGTGAACTACCGGTATCAATTCCTTAGAGCAGGCCGTGAAGCTATATGATGAACGTGAGCTGGCTAACAAGCTGATGGATGTCCTCATGAAGGCTTTGGCTAAGGGGCAACCACCAAGAACAACCTTCCTGGTCCTTGAGCTGAAATATGAACCGAGGACGGTTTACAGAATCCTATGCAGCGTTCTTGCGCCAATCAAAGGTCATGATGATGAAGAAGATGTCGTAGGCATCGTGAAGAATATCGTCTTGAACATCACACATGGTATTCCCATCAACATTCATGATTTCTTCTTGAGGAATTTGGCCGAAAATGCTATGGCTCCTTTTGACCACAAGATATATGCTCCATGGATCATGAGATTCATCAGAACAAGATTAGGCATCAATTATCACGCTGATTTCAACAACCATGTCGGTTATATGCCTCCTATAAGGGTCAACAAGAAGACTTTCGAGCCTGTTGAAGGAAAAGGCAAGTGCGTCATTGATGAAGGCAGTCGGCCCCTTGATGGTCAGTGCAGAGAGCCCAAAGCTTATTCTTCATGGGATGACACTGAGACCCATCCTCCNNNNNNNNNNNNNNNNNNNNNNNNNNNNNNNNNNNCACTGAGACCCATCCTCCATGTCTTGTTACTCCTAGGGTGATGAATACCAGAGAGCTTCTTCTAAGTCTTCACCAGAAGGTGGATCGGAATCACAAGTGGGTCCAACGCCAGTTCGGCGCTATTGTGAAAACCCTCAATGAAACGCAGAATGCTGTGAAGCTTAACCATTATTATCTTCATGAGGTTTTTGATCGCACCTGGGCTACACTAGCTCACTTGAAGACTCCACCAGAACTNNNNNNNNNNNNNNNNNNNNNNNNNNNNNNNNNNNNNNNNNNNNNNNNNNNNNNNNNNNNNNNNNNNNNNNNNNNNNNNNNNNNNNNNNNNNNNNNNNNNAAGATTTCAAGGCTATCAATGAGGCTAGAAAAACTAGCCTGTCTACTAGAATTTCATTGTCATAGGTTATCCTAGAGGTTTGCCATTTACTACCAGGGGTTTGGACAACCAATGGGATTGGCATATCACAAAATGACATGTTATGCAACTGTGCATAACTTTCTGAAATGAAGGAATGAGAAGACCCAGTGTCAAAAAGAACGGACGCTGGGTGATGATTAACAAGAAGCGTACCCAGCATGACGTCGGGATCCTCCGCAGCTTCTTCTGCTGACACATAGTTCACACGGCCACGTGCAGGAGTTGGCTTCACGTAAAAAGCTTTGCCCGACTTGGCCTGCCCGACGGACTTTCCGGGTTGCTTGACACCCACATTCTGAGGACACTCACGGGAATAATGCCCTGGTTCTCCACACTTGTAGCATATCACCTGGTTGGCACGTGGTGCAGCATTGCTAGCTGGAACACCATAAGCTTTTGCTGGAGGGTTGGCCTGATTCGTCTGAGGCGCCATGTAGGATGGCCTCGGAGTGTATCTTGGCGGCAGAGAACTGTTTGGAACCCACAGCCTGCGTTTTGGAAACGAGGAACCAGAAGATGAGCCAAAGTCACGGGAGTGCTTCCTTGTGGCTTCGAAGTCAGTATGACCAGTCTCCGCACTGATCTCCTTGTTGACTAGGGCTTGAAAACTTGCACACTCATGGAGGCTCAGGTCACGACGGAGCTTAGGGCTCAGACCCTTACGAAACCTTGCTTGCTTCTTGGCGTCAGTAGACACCTCCTCTGTTGCATAGCGGGCGAGGTTACCAAAGTCGCGGCTATAGGCATCCACAGACAACTTGCGCTGAGTGAAGGCACAGAACTCCTCTCTCTTTCTGTCCATCAGGCCCTCTGGAATATGGTGCAGACGAAAAGCTGCACTGAAGTTTTCCCACGTGGCCACTGGTTCAGCGGGACGCATAGCTTCAAAATTCTCCCACCACAGATTGGCGGGTCCCTCCAGGAAATACGCCGCAAAGGTCACCTTGTCGGCCTCAGACACATTCGCTGAGCGAATCTTGCGTGAGATGCTGCACAGCCAGTCATCAGCGTCGAGGGGATCGACAGAATGATGAAACTTTGGAGGATTCAGCTTCACAAAGTCATTGAGGGACACTGCAGCATTCCTAGGCTGTCGATCCGTATTCTGCTCAATACGCTCTAGCAGTCGGTTGGTCTCCCTTTTTGTTTCTTTCTGCCTCAAGCATCACTTCTACCAGAGAAGGTGGGTGAGGCAGGTCTTCCTGCGACGCTTGACTACCCTCACCTTGCTCATGAGCAGGGGCACGGTTAAACCTGGTGAACACCATCCTGACAAACAAACTCATAGCTTAGACCAATATCATATCAATACTAGCTATGGATTAAGAATGTACTGAACACACGGAATGCGCAAATGAATATCCGAACAGCATGGTAACAAGCAACCGCTATATATACACCATGGTTCATACACACCCTTACATAGTTCAGTACACCCTTAACCGAAGAGCAAACTACTGAAATTGTGAAACTACTCATCAGAGGCTTACAAGCTGCCTATACTGAAACTCCTCATCAGAGGCTTACAAGCTTCCTATACATTATTTATCTAGGCCTCCGGAATTCATTTCACATTACAACCATACTTCACAAGTCACACAGGACTGTGAACGTACGACTACTACTATACTATCCTTTCGCTCACAGCTCAGGCATCCGCATAGAACATCTCATAGAGATTACCTCCATGACCTGGAAGCTCAACCTGCGGATCAGGAAACACTCTAGCCTGAGATCCCTGGGATCCATAAGGACACGGATGTGTCCTTGGTCCCCTGACTGATGGTAAGAGGGGTCCCCGAAGAGGTGTGACTCCTCCTATAGCTGGCCAGTCAACGTGGGCCGGAAGATGGGTTCTAACAGGATTCAGCATCTCCATCTCTCCATACCCTGTCTGCACTACCGGTGCCAGCTGCGTCAAAGCTGTCCACAGACGGGCACGGGTAGCATAAAGCTCCATGCGGAGAGCACGAGCATCCCTGTCTCTGTTCTCTAGCATCTCAACAGTGGACTGCAGAAGTGGATCCTCCATAGAAGAATCAAAATAGACTCCACTGAGGTATCCCTCTTCACCAGACTGAGAGGCTGGAACATAGCAGAACTCTGAATTCTACAGCAGTGCATGTCTTGCTCTCATAATAGTCAGCATTGAATAGGCAGCATCCTGAACTGCCATGTCAACGGTGACCCCCAACCCATAGGACCAATGGATTGGCTTCTCAGCTCCAGGGTAGTCTGGAAATACCCTAACAGTGCAGATGTACTGGCTCTGGTTGAAGTCTCGGTACTGTTCCTCCACTGTGTACTCGGGGTACCAGCGGTAACCGCACACCGACATCACCCTGACCAGCATGGCCGTATGACCCGGTACATCAATGCACCTGGTCAGACGTACCACCTGACGAGAAGGACGGCCAGGCATCTATAAATAGAGAGTAATGCAAAAGCATTAGAGCTCTGAATGCAAAATTGGGCAGCATAACGGCTGTAATTGCTCAAAACAAATTTTGAGACGACCCAAAAATGGAATAGCGTAACCACTCAACTATCAAGTTCAACTCTCTGATCATCANNNNNNNNNNNNNNNNNNNNNNNNNNNNNNNNNNNNNNNNNNNNNNNNNNNNNNNNNNNNNNNNNNNNNNNNNNNNNNNNNNNNNNNNNNNNNNNNNNNNGCGACTTTGGAATAATGATGGTATGTTGTGTGGAATCATCTTGGCAATTGATAACAAGATCGGTAATCATTCTTGCAATTTTATATGAGGGAGAGGCATGAGCTAACATAGTTTTCGTGCTTGGGTCATATGAACTTATGACTGCATCTCTAGCAACTATCCGCCACTACTAGAAATCATTAAGGTAAAACAAACCATAGCATTAAACATCAGGTCCCGTTTACTCCCATACGTAAACAACCCCATTACTCGGGTGTAAGCTTCTGTCACTCTAGCCACCCACTATAAGTGTATCATGAACAAATTGCAACACCCTCCAGTGTGAATCCCTCACATGTGCGCCTCATGGAAGGCACCTTAGGACAATACAAAAATAAAACGTACAATCAAACCAATCAAGATCATCAATCAACCCAAAGGACAACATAGACCTATTCAAACATCATAGGATGGCAACACATCATTCATTAATAATATTTGCATGAAACACCATGTTCAAGTAGGGTATTACAATGGTGTGCGTAAGAGTGGACCAATGAAAAGATATGAGGAAGGTGATTAAGACGGTAATGATGATGAAGATGATCACCGCAGCAATGGCTCCCTTGGCAGCACTTCGGTGCCGCCGGAAGAGAGGGGGAGAGAGTCTCCCCCCTTAAGCATTCTCCTCCATGGCNNNNNNNNNNNNNNNNNNNNNNNNNNNNNNNNNNNNNNNNNNNNNNNNNNNNNNNNNNNNNNNNNNNNNNNNNNNNNNNNNNNNNNNNNNNNNNNNNNNNNNNNNNNNNNNNNNNNNNNNNNNNNNNNNNNNNNNNNNNNNNNNTTTTTTGCTGCTATTTTGTGGCCCTTCACCGTTTCTTAAATATCCGGGGATCTGTAAATCCGATTGGGCTGAAATTTTGAAGGGATTTTTATTAGGAAAAAATATTTCCTGCGGTGAAAGAAGGGCCCCAACCTACTTAAGGGGTGGCCACAAGACATCAGCGCGTGACCACCCCCCTAGTCGCGCCATGTTGGCTTNNNNNNNNNNNNNNNNNNNNNNNNNNNNNNNNNNNNNNNNNNNNNNNNNNNNNNNNNNNNNNNNNNNNNNNNNNNNNNNNNNNNNNNNNNNNNNNNNNNNTGAGAGGAGAGGGAGGCATCCAATAAAAAAGTTCTTGGCGGCGCCACCCCCTCTCTCTCTAGTCGTTTTCTCCTCCATTGCTTCGTGGCAACGCTTGGCAAAGCCTTACCGAGATCGCACCACCACCACTGTCACCACGCCGTCGTACAGCCAGATAACTCAATCTACTATTTCGCTGATGCTCGCTGGATCGAGGTGGTGAAGACGTCATCAAGCTGTACGTGTGGTGAACGTGAAGGCATCGTCCGTTCAACGCTTGATCGGGTTGGATCGTGATTGGATCGTAGGACAGATCGTGATAGGATTGCAGAGACGTTCAACGACATCAACCACACTTTTAACGCTTCCGCTTAGCGATCTACGAGGGTATGTAGATGCCTGCCCCTCTCGTAGTTGATGATCTCCATAGATAGATCTTGGGTGCGCGTATGATTTTTTCGCATGCAACGTTCACCAACAGCGGCATATGATCTAGGTCGATGCATACATAACATGCACGAGTAGAACACAAAGTGTTTGTGGGTGTTGATATTCATATTGCTTACTTCCTTAGTCTGATCTTGATTCGGCGGTATTGTGTGATGAAGCGGACTGAACCAACCTTACTCGTCCACATAGGAGAGACTGGTTCCATCGACTGACATGCAACTTGTTGCATAAATATGGCTGGCACGTGTTTGTCTCTCCCACTTTAGTTGAATCGGATTCGATAGAGGCGGTCCTTGCGGCATGTTAAATTGAAAGTTGAATATCACTGTTGTGGCTTTGCGTAGGTAAGAACGGTTCTTGCTAGTTCCCCATAGGAGTCACGTAAAACATGCAATAACAAAGTATAGGATGTCTAACTTGTTTTTGCAAGGCTTGTTGTGATGTGATATGGCCACAGACATGATGATGTGATATATGTGATGTATGTGATGATCATGTTTTGTATAGATTATCACGACTTGCATTTCGATGAGTACGGTAACTGGAAGGAGCCATAGGGTTGTCTTTAATTTATTTGTCCCTTTTTTCTTTACTTTATTTCTATGAGTTAGTAACGGTTGTAGAAGGAATAGTTGGTGCGACAACCACATGACGACAAGATGATGGAGATCATGGTCTCATGCCGGTGATTATGGAGATCATGTCGGTGCTTTGGAGATGGAGATCAAAAGCACAAGATGATGATGGCAATATCATGTCACTTATATGATTTGCATGTGGTGTTAATCCTTTTATGGATCTTCTTTTTCTTAGGATGAAGGTAGCATTATAAGATGACCCCTCACTAAAATTTTAAGTTCAAATTGTGTTATCCCTAATTGTGCACCACTTCAAAGGTTTGTCGTTTCGAAGCACCATGTGATGATCGGGTATGATAGACTCTATGTGTTGGAAATATGCCCTAGAGGCAATAATAAGTTAGTTATTATTATATTTCTTTGTTCATGATAATCGTTTATTATCAATGCTATAATTGTATTTATTGGAAATGCAAATACATGTGTGGATACATAGAAAAACACAGTCCCTAGTAAGTCTCTAGTTGACTNNNNNNNNNNNNNNNNNNNNNNNNNNNNNNNNNNNNNNNNNNNNNNNNNNNNNNNNNNNNNNNNNNNNNNNNNNNNNNNNNNNNNNNNNNNNNNNNNNNNCGAGAAGAAAGGGAGAAAAAGAAATAAACTAGCATGGATGATAAAGTGACAAGGTGTGAACACCAACTAACAAAGTGAAAGCGTGAGCAAGAATATAAAGTCGGTAAGAAACACGTACTCCCTCAAGCTTAGGCTTTTGGCCTAAGTTTGTTTACTTCCATGGTGGGAAGTAACCGTCTCTCGGGTACTCCGGAGTGTACTGAGGGTGCCACTGCTGGGTGAGCTCCTCTGGTTCCCATTGATAAAATGGCGTTTGGTACTCGACTGGTAGCTCGGGCACGGGCGCCTGTGGTGGCGCTATGCCCCAATATGCGTAGATGTCCGAGGGCATAATAATGTACCTGCCTAGATGAAGATTGAACAAAGAAGGAGCAGGCAAAGTAATAGTCTCATGAGTACCCTGACTGAATACCAGGTTATAAATCATCGTCTTATTTATATCTTTATCAGGAAAGTCATGGCGAACCATGCTATCATAATCTAGATATCTCTCAGAAAGAAGCATCTCTTCTTCCTTGTGCAGTCTAATAGGTATCTCAAAATGTCTAGCAAGACGGGTAGCATGGATACCTCCATAAACAGTGCCTTTAGTACGGTTTGTGTTCTACCGTTGAGCCACTATAGCGCCTAAGCTATAAGTTTTATCANNNNNNNNNNNNNNNNNNNNNNNNNNNNNNNNNNNNNNNNNNNNNNNATAAGTTTTATCATTATAAAGATCTTCGCGCAAGACCTTAAGATCTGGGGAGCTAAGGGCTCCAGCTTTCCCACCGCCAATCAAATATTTTCCCACGAATAATGAGAAGTACCAAAGCACGGGTGAATGTATGCTAGCAACTCTAGTGCAAGACACTCCTCTCTCCTCTCCTACAGCAATAGTATCAATGAAAACCTCCAAGTCCCGTGGACGAGCTTCATGAATATACCTCACATAAGGTAATTTGCAAACATTGCAAAAATCGTGAAGTGACATGCGCTGGGGGATATCATATAACTTGAACTCAACCATAGGAGGACTCTTCCTTGGATAGAAGTTAAAGCTTTGCACGAAAATATTAGTGAGGAGGAGGTACTGTGGACACTTATCTTCGATGAATGCGGTAAGTCCTGCGTTCTCCACCAAGTAATAAAAATCCTCATAAAGACCGGCGGCACGTAAGAACACNNNNNNNNNNNNNNNNNNNNNNNNNNNNNNNNNNNNNNNNNNNNNNNNNNNNNNNNNNNNNNNNNNNNNNNNNNNNNNNNNNNNNNNNNNNNNNNNNNNNGAGGAATACCTTGTGTGTATCAAACATCACAACGTAACTGGGTGGCCATAAAGGTGCTCTATAGGTATCTTTGAAGGTGTCTGTTGGGTTGGCATGGATCAAGACTGGGATTTGTCACTCTGTGTGACGGAGAGGTATCTCAGGGCCCACTCGGTAATACAACATCACAACAAGCCTTGCAAGCAATGTGACTAAGGAGTTAGTCACGGGATCTTGTATTATGGAATGATTAAAGATACNNNNNNNNNNNNNNNNNNNNNNNNNNNNNNNNNNNNNNNNNNNNNNNNNNNNNNNNNNNNNNNNNNNNNNNNNNNNNNNNNNNNNNNNNNNNNNNNNNNNNNNNNNNNNNNNNNNNNNNNNNNNNNNNNNNNNNNNNNNNNNNNNNNNNNNNNNNNNNNNNNNNNNNNNNNNNNNNNNNNNNNNNNNNNNNNNNNNNNNNNNNNNNAGGAACCAATATGCGCATCCAGGTCCCGCTATTGGTTATTGAACGTAGAAGTGTCTCGGTGATGTCCGCATAGTTCTCAAACCCTGAGTGTCTGCACACTTAACGTTCGGTGATGCTAGAGTAGTATTGGGATATGTACGTTGGTGACCAAATGTTGTTCGGAGTCCCGGATGAGATCCTGGATGTCACGAGGAGCTCCGGAATGGTCCAGATGTAAAGATTTTTATATGGGAAGTCCTATTTTGGCTATCGGAAAAGTTCTGGGTTTTATCGATATTGTACCGGGAAGCTTCTGGAAGGTTCGGGAAGGTTCCCTCCAGACCCTAGGACGTGCAANNNNNNNNNNNNNNNNNNNNNNNNNNNNNNNNNNNNNNNNNNNNNNNNNNNNNNNNGCTATAAGGTGGCGTCCAAGCCTTGTTGGGTGATGACCCACAAATATAGGGGATCAATCATAGTCCTTTTGATAAGTAAGAGTGTCGAACCCAACGAGGAGCAGAAGGATCTGACAAGTGGTTTTCAGCAAGGTAAAATCTGCACGCACTGAAATTATCGGTAACAACTCATTGTGTGGTGAGATGATTCGTAGCAAGCAACAAGTAACAAAAGTAACAACGGTGCAGCAAAGTGGCACAATCCCTTTTGTNNNNNNNNNNNNNNNNNNNNNNNNNNNNNNNNNNNNNNNNNNNNNNNNNNNNNNNNNNNNNNAAGGGACAAGCCTGGACAAAGTCTTATAGGAGGAAAAACGCTCCCGAGGACACACGGGAATTTGTGTCATCCTAGTTGTCATCATGTTCATATGATTCGCGTTCGTTACTTTGATAGTTTGATATGTGGGTGGACCGGCGCTTGGGTACTGCCCTTACTTGGACAAGAATCCAACTTATGATTATCCCCTCTCGCAAGCATCCGCAACTACGAAAGAAGAATTAAGACAAAGTCTAACCATAGCATTAAACTAGTGGGTCCAAATCAGCCCCTTACGAAGCAACGCATAAAGTAGGGTTTAAGCTTCTGTCACTCTAGCAACCCATCATCTACTTACTACTTCCCAATGCCTTCCTCTAGGCCCAAATAATGGTGAAGTGTTATGTAGTCGACGTTCACATAACACCACTAGAGGAAAAACAACATACAACACATCAAATTACCGAACGAATACCAAATTCACATGTCTACTATTAGCATGACTTATCCCATGTCCTCAGGAACAAAAGTAACTACTCACAAAGCATAATCATAATCATGATCATAGGTGTAATGAATAGCATCAAGGATCTGAACATAAACTCTTCCACCAAGTAATCCAACTAGCATCAACTACAAAGAGTAATCAACAATACTAGCAACCTTACAAGTACCAATCGGAGTCGCGAGACGGAGATTGGTTACAAGTGAGGAACTAGGGTTTGGAGATGAGATGGTGCTGATGAAGATGTTGATGGTGACGAGTCCCCTCCGATGAGAGGAGTGNNNNNNNNNNNNNNNNNNNNNNNNNNNNNNNNNNNNNNNNNNNNNNNNNNNNNNNNNNNNNNNNNNNNNNNNNNNNNNNNNNNNNNNNNNNNNNNNNNNNAGGATGAGGAGGAGGAAGAGGCGAAGGAGGAGGAGAAGAAGAAGAAGAAGCAAATAAGAAGAGAAAAAAAGGAGAAGAAGAAGGAGAAGAAGATGGAGAAGAAGGAGAAGGAGAAGGACACCTTCTCCTTCTTCTCCTCCTTCTCCTTCTTCTTCTCCTTCTTCTTCTTTTATTCTTCTCTTCTTTTTCTTCTTCTTCCTTCTTTTAATTTTTTCTATTTGTTCTTCNNNNNNNNNNNNNNNNNNNNNNNNNNNNNNNNNNNNNNNNNNNNNNNNNNNNNNNNNNNNNNNNNNNNNNNNNNNNNNNNNNNNNNNNNNNNNNNNNNNNNNNNNNNNNNNNNNNNNNNNNNNNNNNNNNNNNNNNNNNNNNNNNNNNNNNNNNNNNNNNNNNNNNNNNNNNNNNNNNNTTTGAGCTAAATTAGCTAATTATGTCATTGTTGGGGAAAATAAGCTAAGGATAAGATGGAAGAGGAGAAGAAAGAGGAGGAGAAGGAGAATAAGAAGAAGGAGGAGGAGGAAAAGGAGGAGAAGAAGAAGGAGAGGAAAAGGATATGTCATTTAGGAGGAAAATCTTAGTATGTCATTTAGGAGGAAGATACGCTAAGTTACGAGCTAACAAAGGTTCTTTTGATATTTTTACCTAAGAAAGCTAATTATGTCATTTTTGGACCTAAAGTAGCAAATTATGTCATTTTGGAGGATAATTAGCTAATTATGTCTTTGTTGGGAAAATAAGCTGAGGAGAAGAAGAAAGGGGAGAAATTAGCTAATTACATCATTTTGGAGCTAAATTAGCTAATTATGTCATAAATGAACTAGAGAAAACTTACCTTCGTCGTCATCTAGGAGAAGCACCAGGGCTGCTCGGGNNNNNNNNNNNNNNNNNNNNNNNNNNNNNNNNNNNNNNNNNNNNNNNNNNNNNNNNNNNNNNNCAGGGCTGCTCGGGTCTGTTGCGTTTGGAGAAGGTTACCTGGAGAAGGGTCGTGTGATGCCGCTCGGGAATTATTCTGTAGAAAAGATATTTTGCAATTTCTCTTTAGCATGACGACACTCAAATGTTAATAGTAGTTTATAATGACCATTGAAATGAAACTCACTATGCCAATCGCAGAAAAGACAACCATCGATGGAGGGGGCTGACCGGTCTTCTCGCACAAAGACTTCACATTTGTTTTTGAAGAGTCGGTCATATTACTTACTAATGAAACCGACATTACACGCATGATTTGGGTAATGTGAAATAGGAACTTAACACAATAAGCTCGTACATGGCGAGGTGACCTGCCTCATTCCGGGCCCTCTCCTCCTCCAACAATCGAGTTGTGTTCCGGTCCCTCTCCTCAAGAGCATCCTGAAGAGAAGCCTCGTTGCAACTCTCTCTTTATCAAGAGCATCCTGGTTTGAAGCTCTCTCTTTTTGAAGAGCAACCTGCAACACCATTCCTCATTACCACTATAATAATCAATGGCCACACACACAATGAAATGGATGAAAGTTCTGTGAGTCCGTACAACTGACCTCGATGGCGAGATCGACCGTCCGTGGATGAGGTGTTATCGCAGGACAGGAGCTTGACTAGCGCTCCTTGATCTCCGTGAGAGTGAGTGGACAACATATTATCACATATCCAATGCATATAGAGCCATGGGGCCTCCCGCCGCCAGATATCATCACCAGCTCTCGATCCAAAGGTTCCTGGCTTGGGTTAAAGTCCTCCCCTTTCCTAGCCTTCCCCACGTCCCTGTATTTCATGAGCTTGTGGTGGGAGGAGATGTTGGTGACCATCTCTGGAGGATCCAGGTCAGACTCAGAGAATGCCTTAGCCTTCTTGTAGGAGGCAGTATGGGCCATACCATGAAGGTCATACAACTCAGGCACCTACGTCTTATTGTGATGCGCCTAAAAGAGAGGAACAAAGTATTAGTAAGGCCTCAAGCTAGCATGAAGAACTAATTGCATGAATAAGGAAGCAAACCGCATACCCAGTTCCGTCTGAACTAAATTAAGTTGGCGCTGCCTTGATGATGTGGCACACCAACCATTTGGGCACGCCTCTCCTTTGCTTTGTCGTGCACAGCTCGCCAGTTGCGTGTGCACCACTCATCCACCAACTCCTCCCAACAATCCATCTTATTGGCACACCATCTCAGGGCTCCTATAAGTTAGTAAAAAGAATTTTGAACGCTACGCCTACAAATCAAATAAAGAAAGCTACGTACAAGGCCTTAAGAATAGGAAATTACCTACATGTACTGCTCTTCTTCAGATACTTTCCGCGGAAGTCGTTCTTCTCCTTCTTAACACCACGCGTGGCATAGTAGTCTCGAATAGCGTGTGGCCGAGCCTCATGGCGCAAGTTCTGTAATAGCCGCCCGCACTCGGCCTCGAGAACATTAGCCGCCGCCNNNNNNNNNNNNNNNNNNNNNNNNNNNNNNNNNNNNNNNNNNNNNNNNNNNNNNNNNNNNNNNNNNNNNNNNNNNNNNNNNNNNNNNNNNNNNNNNNNNNGCCCATCGTCGTGGGGTAAGGGTTCCCTTTCCTTCTTTTTACTTTGTCTTGTGTGAAGTCTTTTTCCTCAAAGCATCGCTTGGCAGGGAGACGGAGGATGTGGAGGAACACACCGCCTCCACCGCCGAGCGAGCCGGCTGGGCAGCGGCTGACGCTTCCCAGAAGGAGCTCGAGGAGCAATCCGCCNNNNNNNNNNNNNNNNNNNNNNNNNNNNNNNNNNNNNNNNNNNNNCCGCCCGCCGCTGGGATTGGGCCGTGGAGAAGAGGGCCGAGGGCCAGTCCCGGCCGAGCCGGGCCGAGAAGCCTGCGGAGAGGCGCATGAAGGCTAGACATGACCCCTTCACGCGTGCTCGCGTGGAGGAGCGAGCTAGCGAGGCGGCCCCGAGGCGCGCCCCGAGGACCAAGGAGGCCCAACCGTCCAAGCCGGATGTCTATGCGCCCGTGGATCTTGAGGTGATCCCTGATTCACCTGAGGCCGAGGCGGCGGCCGACGCGCCGGAACTGAACCTGGACGCGCCAGACGTGGCCCTGGATGCGCCAGAGGTGAACATGGATGCACCGAACGCGGCCCATCCACCTCCTGCTGAGGAGACGGCGCCGGCTGGGGTGTCGGCGGAGCCGGCCGCCATGCCAGGAGGAGACGGCGCGGGCTGGGGTGTCGGCGGAGCCGGCCGCCATGCCAGCGCCTGGAGACGGAGCCATCGTTGTCTCCAACCATGGCCCGGCTGCTCAAGGAGCTGGCCCTAGAGCCGGGAGCCGGCCCATGAAGGCTTGGCATGCGGCCAATCTTGAGCGCCAGAAGCTGCCCGTAGGCACCATGCTCCAAGGTGTCCAGGAGCTGGTATCGTTGTTTGCCAGCAGTCGATACAATGTGGACCACGTGGCCCGCGTGGTGGGCAGCAATCTGGAGCGTTTGGAGGAGCGCACTAGGGTAAGTGTCTTGTCTTTGTCTTCAATTTTTTCTTCTTCTTCTTGAAACAGTGGGGGCACGCCAACGCACCCACTAGGTGTAGCCCCCAAGAGTCGGGTCGGCCGATCATCGGCCGGGCCAAATCTCTTTGAGCTTCATCTCTTGCTTTGCTTTTTTACTGGGGGCATGCTAGCGNNNNNNNNNNNNNNNNNNNNNNNNNNNNNNNNNNNTACTGGGGGCATGCTAGCGCACCCACTGGGTCTAGCCCCCGAGAATCGGGCTGGTTCTAATTTAACCAGGCCGAATCTTACTTTTGCTTCCTCTTTCCTTGTAGGATCTTTATGATGCCCAGGTGCAAGCCTACAACACGCTACGGGCTCAGAACCAGGCTGCTGATGGCCAGATCTCCGAACATGAGGCCCGGCTGGGCGAGGATGCCATGGAGCGGGATACCCTGCGCGAGGTAGACGGGCGGCTCCAACAGTAGCTAACTCTTCTCCAGGCGGATAAGAAGGAGCTCGAGGCGGCCCGCCAGGCCGAGCAGGAGCAGCTGCGCGCCTCCCTGCAGGAGAAGGACGCCTCTCATGTTGCCGACGTGGAGCGTCTTGAGACTGTTCATCTCGATGAGATGAAGCTCAAGGACTCTACCTTGAAAGAGAAGGAGGAAGCCCTGATCCAGAAGCAGGCACAGCTGGCCAAGGCCCTGGACACGGCGGTGGCCCTCCCGGAAGGAGTGACCCGCATCACCCAAGCGAGCAAGGTGCGGGAGATTGAGGCCCTGGAGGGCGCTCACGAGACTGATAGCCACTTCGACCGTGAGTCTTCTTTGTTTTGTCTTGAATTTTCTTCTTTGCTGCCACCTCTTCTTATTCTTNNNNNNNNNNNNNNNNNNNNNNNNNNNNNNNNNNNNNNNNNNNNNNNNNNNNNNNNNNNNNNNNNNNNNNNNNNNNNNNNNNNNNNNNNNNNNNNNNNNNTTCTTGCCAAACCACAGTTCATACGGTATCGTCTCAACGGATTTAGACGGTGCCCTATTTAAAGTGAATTCTGCAGTTTCTAATGCGTATCCCCAAAATGATAGCGGTAAGTCGGTGAGAGACATCATAGATCGTACCATATCTAATAAAGTAATAAAGTGCGATTACGATGTTCAAACACTCCGTTGCATTGCGGTGTGCCAGGCGGCATCAGTTGTGAAACGATTCCACACTTCCTTAGGTGTGTGCCAAACTCGTGACTCAAATATTCTCCTCCACGATCAGATCGTAGACATTTAATTTTTCTGTCACGTTGATTCTCAACCTCACTCTGAAATTCCTTGAACTTTTCAAACGTCTCAGACTTGTGCTTCATCAAGTAGATATACCCATACCTACTCAAATCATCGGTGAGAGTGAGAACATAACGATAACCACCGCGAGCTTCAACGTTCATTGGACCACACACATAAGTATGTATTATTTCCAATAAGTCGGTGGCTCTCTCCATTATTCCTGAGAATGGAGTCTTAGTCATCTTGCCCATGAGGCACAGTTCGCATGTGTCAAATGATTCAAAGTCAAGAGGCTCTAATAGTCCATCAGTATGGAGCTTCTTCATGCGCTTAACGCCGATATGACCAAGGCGGCAGTGCCACAAGTATGTGGGACTATCATTATCAACTTTACATCTTTTGGTACTCACACTATGAATATGTGTAACATCAGGATCGAGATTCATCAAGAATAAACCATTCACCAGCGGAGCATGACCATAAAACATATCACTCATATAAATAGAACAACCATTATTCTCTGACTTAAATAAGTAGCCGTCTCGCATTAAGCAAGACCCTGATACAATGTTCATGCTTAAAGCTGGTAGGTAGCGTGCCGACGGCGATCACATCGACCTTTGAACCATTCCCGACGCGCATCGTCACCTCGTCCTTGGCCAGTCTCCGCTTATTCCTCAGTTCCTGCTTTGAGTTGCAAATGTGAGCAACAACACCGGTATCAAATACCCAGGAGCTACTACGAGCGCTGGTAAGGTACACATCAATAACATGTATATCACATATACCTTTAACGTTGCCGGCCTTCTTGTCCGCTAAGTATTTGGGGCTGTTCCGCTTCCAGTGACCCTTTCCCTTGCAATAGAAGCACTCAGTCTTAGGCTTGGGTCCTTTCTTTTTCTTCTTCCCGGCATCTGGCTTACCGGGTGCGACAACAGCTTTGCCATCTTTCTTGAAGTTCTTCTTANNNNNNNNNNNNNNNNNNNNNCATCTTTCTTGAAGTTCTTCTTACCCTTGCCCTTCTTGAAACTAGTGGTCTTGTTTACCATCAACACTTGATGCTCTTTCTTGATTTCTACTTCTGCAGACTTGAGCATTGAGTACAACTCGGGAATGGCCTTCTCCATCCCTTGCATGTTGTAGTTAAGCACAAAACCTTTGTAGCTTGGTGGGAGAGACTGGAGGATTCTGTCAATTATAGCATCATCCAGAAGTTCGACCCCAAGTGAAGTCAGACAACCNNNNNNNNNNNNNNNNNNNNNNNNNNNNNNNNNNNNNNNNNNNNNNNNNNNNNNNNNNNNNNNNNNNNNNNNNNNNNNNNNNNNNNNNNNNNNNNNNNNNNNNNNNNNNNNNNNNNNNNTGTTGGAGACTTCATATCTCTCGACACGGGTATGAGCTTGAAAAACTAGCTTCAGCTCTTGGAACATCTCATATGCTCCGTGTTGCTCAAAACGCCTTTGGAGCCCCGTTTCTAAACTGCATAACATGCCACACCTAACCAGAGAGTAGTCATCACTTCGCGTTTGCCAGACGTTCAGAATGTCCTGGGATTTTGTGGGAGCGGGAGGGTCACCTAGCGGCGCATCAAGGACATAAGCCTTTTTAGCTGCTTCAAGGATGAGCTTCCAGTTGCGAACCGAGTCCNNNNNNNNNNNNNNNNNNNNNNNNNNNNNNNNNNNNNNNNNNNNNNNNNNNNNNNNNNNNNNNNNNNNNNNNNNNNNNNNNNNNNNNNNNNNNNNNNNNNAGAACTAATTCCTCAGGCCAGATGAAATCCTCAACCAGCTCATCCGCGGATTGCTAATGATGTGGAACTTGACAAAATCCTCAATGACATGAACGCGCCAGGTCCTTTCACTCGCTCAAAAGCTTCACACTTAGTTAACTTTTCTGTGCATTTATCCTTTGTATTAACGCGCCAGGTCCTCTCACTCGCTCAAAAGCTTCACACTTAGTTAACTTTTGTGGGCATTTTTCCTTTGTATCCATCACAGAACCCTCAAAAGTTGCTGAGGCTTTTCTGGAACCGGAGTGGATCCAAGCTATGCAAGACGAACTTCTTCAACTCAAGCTGAATGACGTATGGGAGCTTGTCAAATGACCAGATCCTCGCAAGCACAATATCATCGGAACCAAGTGGATTTTCCGAAACAAGCAAGATGAGGATGGTCAAGTGGTGAGGAATAAGGCATGACTTGTAGCCCAAGGCTACACACAGGTTGAAGGAATAGATTTCGATGAAACTTTTGCACCTGTTGCTAGACTTGAAGCTATTCGAATACTACTTGCGTACGCGAATCATCATAACATCATCTTATATCAAATGGATGTGAAAAGTGCATTCCTCAATGGTAAGCTTGAGGAAGAAGTATATGTTGCTCAGCCCCCAGGTTTTGAGGATCCAAAGAATCCAGACAAAGTCTTCAGACTCGAAAAGGCGCTCTATGGTCTCGAGCAAGCCCCTCGGGAATGGTATGATACATTGATGGAATTCCTCATGAAGAAAGGCTTCAAACCTGGTTAACTCGATCCAACTCTTTTCACTAAATCCTATGATAATGAGCTATTCGTGTGCGAGATATAAGTCGACAGTGATGAATTTGCTTACATGATGAGTGAAGAATATCAGATGTCTATGATGGGGGAGCTGATATTCTTCTTAGGTCTTCAAATTCGTCAACAACACAATGGAATCTTCATATCACAGGAGAAATACCTCAAGGATGTTCTGAGGAAATTCGACATGCATGACTCCAATGCCTACCAACGGCCACCTGTGCACTGACGCAAATGGTAAAGAATTCGATCAGCAGGTATATCGCTTTATGATTGGCTCTTTACTGTATTTATGTGCATCTAGGCCAGATATAATGCTTAGTGTTTGCATGTGTGCACGTTTTCAAGCAAAACCGAAGGAATCACACCATAAGGCTGTGAAACATATTCTTCGATACTTAGCTCACACACCAACACTAGGATTATGGTATCCCAAGGGCTCAAATCTTCATCTGGTAGGGTATTCTGATTCTGACTATGCTGGTGACCGTGTGGATCGCAAGTCAACCTCTGGCACATGTCATTTCCTCGGAAGACCAGTAGTCTGCTGGTCCTCAAAGAAGCAAAACTGCATTTCTCTCTCCACTGTTATGGATGAAGCAAACCCTCAAGGACTACGGCATCAACATGAAGAATGTGCCTCTCTACTGCGACAATGAGAGTGCAATCAAGATTGCATACAACCAGTACAGCACTCAAAGACCAAGCACATCGAGATTCGTCATCATTTTCTTCGGGACCATGTCCTCAAGGGCAATATCCTCATCGACCATGTGAAGACTGATGATCAACTGGCAGATATCTTCACTAAGCCCTTGGATGAGAAAAGGTTTTGCAAGTTGCGGTGTGAGCTAAATATCTTAGAATCTTCAAATGTTTTGTAAAAACATGCACACATCCTAACACTTATGCAAAGTTGATGACTTAGATGTGCAACACATGAATGCCCAGATCCTAACACTTATGCAAAATTGATGACTTAGATGTGCAACACACGATGAATCGATTTTCTTCAACCAATGAAGAATATCACTCTTAGTGTGAGGAAATCAATGAAGAAATTGATTCTCAGGGCCCTACGACAATTGTACACGGCATCTGTAATCAACATTCTCATATGGTGGGTCACGCCACCACCCAACTTGAAATTCCTCCAGTTAAATTTCTTCAAAGCTGAATTTCATCAAAANNNNNNNNNNNNNNNNNNNNNNNNNNNNNNNNNNNNNNNNNNNNNNNNNNNNNNNNNNNNNNNNNNNNNNNNNNNNNNNNNNNNNNNNNNNNNNNNNNNNGCCGGACGAGGACTGGGGGGCGACGTCTGATCACCCGCCGGACGTTGTGGACTGGGGGGCGTCGGCTGACGTGACGGAGGTGTAGGTGAACCGCCACCACCACCACCACCACCACCACCGCCACCGCCACCACCACCACCGTAGGGGGGTGGACTTGTTGTCCTTGGCGCCTCGCCTGGAAACTTGATAAACTTCTTTTGCCATAGAATGAAATGGCGCTTGACATCTCCAAGTCTTTTCTCCCCTTCAGGTGTAGCAATGTCAATCTCCAGGTCCTCAAACCCTTGGACTATGTCCTCCACCGTGACACGAGCATAGCCATCTTGAATGGGGTTGTTGTGGTGGAGTGCTCCAGGTAAACATGGTAAAGCACTGCCGATGGCTACCTTCATGGACATGTTCCCGATAGGATAATACAGATGACATTCTTTCATCTCCTTTATATCGTCCACGGGGTAGCGAGGAGGCTCCGGTGCAGTAATTTCGACCACCAGAGGCTCCGGTGCAGTAATTTCGACCACCAGAGGCTCCGGTGCATTAATTTCGATCGTCGGTGCATCTGCACCAGCCGGTGGGGCCTCCGTGGAAGCCACGCTGCTTCTCCGCTGCTGGCTTCCGAGATCCGCTGGATGATCTTCATGCTGCACCCGAGCTGCATCTCTTTCGGCTACTAGTACACTCATGGTTTTCTTCATCACATCCATTTCCGATGCCAACCGCGCCACAACATCTGCTTCCCGATCCATCTTTCTCTTACGGCTTCTGTAACCATACGGGTCATCGTTCTGGGGGAACCCTATTTTCCACGGAATGTGCCCCATGCCTCGTACACGTCCTCCGTGTTCAGGATTCCCGAGGGCTTTTGTCAGCGCGTCGTTCTCTCTGTTGAACTTGATCTTCCCCTCTTGAGCATCCCTCATTGCGTCAATAAGGGCTTGGGTGGGTTTAATTAATTTGCCCCGGTAAACACACTCCCCTGTCTCCGGGTTCAGCGTTCCCCCATGCCCGTACCACCAGCTTTTGGCCCTTGGGTCCCATCCCTCCGTACCTGGACGGATTCCTCGCGCCCTCAGCTCGTTCTCCATCTTCTCCAACCTAGGCAACAAAATGCGATACCCTCCTGGCCCCATAATATGATTGTACTCCTTCTTAGCCGCATTTTCCTTATTTTTTTTCGATATTTGAATGAACTGCTCCGATTTCTTTTGCTTCACAAATTCTGGCCAATCATGTTTCAGTTTCTCATATTGTCCTTTGAAATCCGGAGTCTTGTTCTGCTTGACAAAGTCATGGGCTAGATTTTGCTTGAATTTCCGGAATGCGTCGGCCATCTTATGAAGAGCGAACTGTTTGACTAGCCTCCTCCTCTCCTTGTTTTCCTCAATCTTGTTACCCTCCTCATCGAATTTGTTGTATTCCGGAGGTAGAACGAAATGTTCCATAAGCTTCTTGAAGCAATCTTTTTTTGTTCTCTTATCGACAAAAGTGAAACCTGCAGCAATTCGTGCCTTCTTTGGCTCATTCCACTCCTGGACGGTGATCGAGACGTTGTCTCTAACAACGGCTCCGCATTGGCTGACAAACTTGGTGGCGTTCTTGCGGGGCTCCAGCGGCCTGCCGGTTGCACTGTCGACAACCTCGATGGTGCATGTTTCTCCTTGTTTCATCGTCTTGGTTGCGCCACGCTTTGACGACGTACTCGATTGTTTCGACGATCCGGCCGAGGGCTAAAATAAGAAAGAGAGTCGCGCGCGTTAGTACACACATATTTATTCAAATCAGTTAGTTTGTATCACCAGAGGCTCAATGTATATATATACCTCGGCGCCGGAGGTGGTTGCTACTTCCATTTGAAGATCGTCGTTTATCGACGTTTGTTCGGCATCATCTTGCTGACGGCGCCCTTCATCTTCACCGTCAAGGTTCAGATAAGAAGAGATATCATCTTCTTCTTCTCCGGTCGGCACATATAGAATATCGCCGTTTATGATGCCGAACATATGTGCTTCACCGTCCGGATCATAGTTGTCCATAATCGGGTCAGCTCTATCGTCCGCCATTATGTCAGTCCTGAAAACATGTAGTAAAAACAAATTAATTAAGTGAAGAAGGGGGGCGGTGGCGGTGGCGGTGGCGAAAGGGCGGTGGCAAAAGGAGGGGGCGAGGAAGGGGTGGGAGAGGGTGTCGCGGTAGAGTGCGAGACGGGGCGGCAGACGACGGCGTCACGGAGAGTTTTAACTAGAGTTTTTGACCGTGAACCTGCTGCTTCAGCTTTGCACTGGCCGACCGCCGATTCGCTGGTTCATTTGCTAGTTTTTTTCAATTTAGATTGATTAATTATTTAAATTGATGATTTTTTAACTCGATGATCTTTTTTATATTCGATGAAACTTTTTCATATTTGATAGTCTCTGTTCTTTTTCATATTCGATGAAACTTTTTATATTCGATGAAACTTTTAAATAGATAGTCTCTGTTCTTTTTCTTCCAAGACGTTCTTTCAAGACGTTCTTTTTCTTCCAAGACGTTCTTCCAAGACGTTCTTTTTCTTCCAAGACGTTCTTCCAAGACGTTCTTCCAAGACGTTCTTCCAAGACGTTCTTCCAAGACGTTCTTCCAAGACGTTCTTCCAAGACGTTCTTCCAAGACGTTCTTCCAAGACGTTCTTCCAAGACGTTCTTCCAAGACGTTCTTCCAAGACGTTCTTCCAAGACGTTCTTCCAAGACGTTCTTCCAAGACGTTCTTCCAAGACGTTCTTCCAAGACGTTCTTCCAAGACGTTCTTCCAAGACGTTCTTCCAAGACGTTCTTCCAAGACGTTCTTCCAAGACGTTCTTCCAAGACGTTCTTCCAAGACGTTCTTCCAAGACGTTCTTCCAAGACGTTCTTCCAAGACGTTCTTCCAAGACGTTCTTCCAAGACGTTCTTCCAAGACGTTCTTCCAAGACGTTCTTCCAAGACGTTCTTCCAAGACGTTCTTCCAAGACGTTCTTCCAAGACGTTCTTCCAAGACGTTCTTCCAAGACGTTCTTCCAAGACGTTCTTCCAAGACGTTCTTCCAAGACGTTCTTCCAAGACGTTCTTCCAAGACGTTCTTCCAAGACGTTCTTCCAAGACGTTCTTCCAAGACGTTCTTCCAAGACGTTCTTCCAAGACGTTCTTCCAAGACGTTCTTCCAAGACGTTCTTCCAAGACGTTCTTCCAAGACGTTCTTCCAAGACGTTCTTCCAAGACGTTCTTCCAAGACGTTCTTCCAAGACGTTCTTCCAAGACGTTCTTCCAAGACGTTCTTCCAAGACGTTCTTCCAAGACGTTCTTCCAAGACGTTCTTCCAAGACGTTCTTCCAAGACGTTCTTCCAAGACGTTCTTCCAAGACGTTCTTCCAAGACGTTCTTCCAAGACGTTCTTCCAAGACGTTCTTCCAAGACGTTCTTCCAAGACGTTCTTCCAAGACGTTCTTCCAAGACGTTCTTCCAAGACGTTCTTCCAAGACGTTCTTCCAAGACGTTCTTCCAAGACGTTCTTCCAAGACGTTCTTCCAAGACGTTCTTCCAAGACGTTCTTCCAAGACGTTCTTCCAAGACGTTCTTCCAAGACGTTCTTCCAAGACGTTCTTCCAAGACGTTCTTCCAAGACGTTCTTCCAAGACGTTCTTCCAAGACGTTCTTCCAAGACGTTCTTCCAAGACGTTCTTCCAAGACGTTCTTCCAAGACGTTCTTCCAAGACGTTCTTCCAAGACGTTCTTCCAAGACGTTCTTCCAAGACGTTCTTCCAAGACGTTCTTCCAAGACGTTCTTCCAAGACGTTCTTCCAAGACGTTCTTCCAAGACGTTCTTCCAAGACGTTCTTCCAAGACGTTCTTCCAAGACGTTCTTCCAAGACGTTCTTCCAAGACGTTCTTCCAAGACGTTCTTCCAAGACGTTCTTCCAAGACGTTCTTCCAAGACGTTCTTCCAAGACGTTCTTCCAAGACGTTCTTCCAAGACGTTCTTCCAAGACGTTCTTCCAAGACGTTCTTCCAAGACGTTCTTCCAAGACGTTCTTCCAAGACGTTCTTCCAAGACGTTCTTCCAAGACGTTCTTCCAAGACGTTCTTCCAAGACGTTCTTCCAAGACGTTCTTCCAAGACGTTCTTCCAAGACGTTCTTCCAAGACGTTCTTCCAAGACGTTCTTCCAAGACGTTCTTCCAAGACGTTCTTCCAAGACGTTCTTCCAAGACGTTCTTCCAAGACGTTCTTCCAAGACGTTCTTCCAAGACGTTCTTCCAAGACGTTCTTCCAAGACGTTCTTCCAAGACGTTCTTCCAAGACGTTCTTCCAAGACGTTCTTCCAAGACGTTCTTCCAAGACGTTCTTCCAAGACGTTCTTCCAAGACGTTCTTCCAAGACGTTCTTCCAAGACGTTCTTCCAAGACGTTCTTCCAAGACGTTCTTCCAAGACGTTCTTCCAAGACGTTCTTCCAAGACGTTCTTCCAAGACGTTCTTCCAAGACGTTCTTCCAAGACGTTCTTCCAAGACGTTCTTCCAAGACGTTCTTCCAAGACGTTCTTCCAAGACGTTCTTCCAAGACGTTCTTCCAAGACGTTCTTCCAAGACGTTCTTCCAAGACGTTCTTCCAAGACGTTCTTCCAAGACGTTCTTCCAAGACGTTCTTCCAAGACGTTCTTCCAAGACGTTCTTCCAAGACGTTCTTCCAAGACGTTCTTCCAAGACGTTCTTCCAAGACGTTCTTCCAAGACGTTCTTCCAAGACGTTCTTCCAAGACGTTCTTCCAAGACGTTCTTCCAAGACGTTCTTCCAAGACGTTCTTCCAAGACGTTCTTCCAAGACGTTCTTCCAAGACGTTCTTCCAAGACGTTCTTCCAAGACGTTCTTCCAAGACGTTCTTCCAAGACGTTCTTCCAAGACGTTCTTCCAAGACGTTCTTCCAAGACGTTCTTCCAAGACGTTCTTCCAAGACGTTCTTCCAAGACGTTCTTCCAAGACGTTCTTCCAAGACGTTCTTCCAAGACGTTCTTCCAAGACGTTCTTCCAAGACGTTCTTCCAAGACGTTCTTCCAAGACGTTCTTCCAAGACGTTCTTCCAAGACGTTCTTCCAAGACGTTCTTCCAAGACGTTCTTCCAAGACGTTCTTCCAAGACGTTCTTCCAAGACGTTCTTCCAAGACGTTCTTCCAAGACGTTCTTCCAAGACGTTCTTCCAAGACGTTCTTCCAAGACGTTCTTCCAAGACGTTCTTCCAAGACGTTCTTCCAAGACGTTCTTCCAAGACGTTCTTCCAAGACGTTCTTCCAAGACGTTCTTCCAAGACGTTCTTCCAAGACGTTCTTCCAAGACGTTCTTCCAAGACGTTCTTCCAAGACGTTCTTCCAAGACGTTCTTCCAAGACGTTCTTCCAAGACGTTCTTCCAAGACGTTCTTCCAAGACGTTCTTCCAAGACGTTCTTCCAAGACGTTCTTCCAAGACGTTCTTCCAAGACGTTCTTCCAAGACGTTCTTCCAAGACGTTCTTCCAAGACGTTCTTCCAAGACGTTCTTCCAAGACGTTCTTCCAAGACGTTCTTCCAAGACGTTCTTCCAAGACGTTCTTCCAAGACGTTCTTCCAAGACGTTCTTCCAAGACGTTCTTCCAAGACGTTCTTCCAAGACGTTCTTCCAAGACGTTCTTCCAAGACGTTCTTCCAAGACGTTCTTCCAAGACGTTCTTCCAAGACGTTCTTCCAAGACGTTCTTCCAAGACGTTCTTCCAAGACGTTCTTCCAAGACGTTCTTCCAAGACGTTCTTCCAAGACGTTCTTCCAAGACGTTCTTCCAAGACGTTCTTCCAAGACGTTCTTCCAAGACGTTCTTCCAAGACGTTCTTCCAAGACGTTCTTCCAAGACGTTCTTCCAAGACGTTCTTCCAAGACGTTCTTCCAAGACGTTCTTCCAAGACGTTCTTCCAAGACGTTCTTCCAAGACGTTCTTCCAAGACGTTCTTCCAAGACGTTCTTCCAAGACGTTCTTCCAAGACGTTCTTCCAAGACGTTCTTCCAAGACGTTCTTCCAAGACGTTCTTCCAAGACGTTCTTCCAAGACGTTCTTCCAAGACGTTCTTCCAAGACGTTCTTCCAAGACGTTCTTCCAAGACGTTCTTCCAAGACGTTCTTCCAAGACGTTCTTCCAAGACGTTCTTCCAAGACGTTCTTCCAAGACGTTCTTCCAAGACGTTCTTCCAAGACGTTCTTCCAAGACGTTCTTCCAAGACGTTCTTCCAAGACGTTCTTCCAAGACGTTCTTCCAAGACGTTCTTCCAAGACGTTCTTCCAAGACGTTCTTCCAAGACGTTCTTCCAAGACGTTCTTCCAAGACGTTCTTCCAAGACGTTCTTCCAAGACGTTCTTCCAAGACGTTCTTCCAAGACGTTCTTCCAAGACGTTCTTCCAAGACGTTCTTCCAAGACGTTCTTCCAAGACGTTCTTCCAAGACGTTCTTCCAAGACGTTCTTCCAAGACGTTCTTCCAAGACGTTCTTCCAAGACGTTCTTCCAAGACGTTCTTCCAAGACGTTCTTCCAAGACGTTCTTCCAAGACGTTCTTCCAAGACGTTCTTCCAAGACGTTCTTCCAAGACGTTCTTCCAAGACGTTCTTCCAAGACGTTCTTCCAAGACGTTCTTCCAAGACGTTCTTCCAAGACGTTCTTCCAAGACGTTCTTCCAAGACGTTCTTCCAAGACGTTCTTCCAAGACGTTCTTCCAAGACGTTCTTCCAAGACGTTCTTCCAAGACGTTCTTCCAAGACGTTCTTCCAAGACGTTCTTCCAAGACGTTCTTCCAAGACGTTCTTCCAAGACGTTCTTCCAAGACGTTCTTCCAAGACGTTCTTCCAAGACGTTCTTCCAAGACGTTCTTCCAAGACGTTCTTCCAAGACGTTCTTCCAAGACGTTCTTCCAAGACGTTCTTCCAAGACGTTCTTCCAAGACGTTCTTCCAAGACGTTCTTCCAAGACGTTCTTCCAAGACGTTCTTCCAAGACGTTCTTCCAAGACGTTCTTCCAAGACGTTCTTCCAAGACGTTCTTCCAAGACGTTCTTCCAAGACGTTCTTCCAAGACGTTCTTCCAAGACGTTCTTCCAAGACGTTCTTCCAAGACGTTCTTCCAAGACGTTCTTCCAAGACGTTCTTCCAAGACGTTCTTCCAAGACGTTCTTCCAAGACGTTCTTCCAAGACGTTCTTCCAAGACGTTCTTCCAAGACGTTCTTCCAAGACGTTCTTCCAAGACGTTCTTCCAAGACGTTCTTCCAAGACGTTCTTCCAAGACGTTCTTCCAAGACGTTCTTCCAAGACGTTCTTCCAAGACGTTCTTCCAAGACGTTCTTCCAAGACGTTCTTCCAAGACGTTCTTCCAAGACGTTCTTCCAAGACGTTCTTTTTCCAAGACGTTCGTTCTTCCAAGACGTTCTTCCAAGGAAGCGAGGAAGGCGGGCGCGGCACGGGAAAGATGAAAGGAACCAACCGCGACGGCGAGGGCGGCGACGGCGGCGACAACGGCGAGGGCGACGACGACGGCGAGGGCGACGGCGGGCGGCGTCGACGAGGGCGAGGGCGACGGCGGCGGCAGGCCTTCGGCGCGCGCGCGACGGTTGGAATCGGAGAAGACGAGAGAGATGGAGAAGACGGCGGCAGGGGAGGCGACCCGCACTGTATTTATAGCCCCCCCCTTTAGTCGCGGTTGGGGACGAGACCCGCGACTAAAGGGTAACCTTTAGTCGCGGTTTGCCAGACCAACCGCGACTAAAGGCCCCCCCCAAATCTTCTTTTATTTTCAGAACCTTTTATCTTTTTCTTTTCAGAAAAATCATCATTGCTTTTATAGAAACTTCAAACATTTTATTTTCTGTTTTCTAAGCATATTTTCGTAGGAAAAATATGCATAGAGACAATACATTGAATCTGCCTAAAACGGGACAGAAAAAAGAGAATCCATTTAAAGGGAACATTGGCCACAGCCTCTCTCCCCCCCGGCCTGGGCCGGCCTTCGGCCTCGACCCATCTTGCTCACGCCTGCCTGGTGCNNNNNNNNNNNNNNNNNNNNNNNNNNNNNNNNNNNNNNNNNNNNNNNNNNNNNNNNNNNNNNNNNNNNNNNNNNNNNNNNNNNNNNNNNNNNNNNNNNNNTGCATTTGTTAAACTAACTAGCTACAAACAATATAAATTAAACAATGAAGTACACACATGCATATTTTATCAATGACACATCAAAGGTTCATCAAGTTGCTAACCGCGATCGAGGAGTGTGGCTCCAACACTTCATGTCATGTTTGTTTCATGCTCTTGGGGCATTTCATCAAACACCTTATGTGCATAAGAGGAACCAAAAGCAAACCTAAACCCTAAGTGTGAAGAGAATGGCTCTAAATGGCTAAGTGTTGGCTGCTGGATGGGTATATATAGGGGAGGGGCTTTAGTTGCGGTTGGCCTGGCAAACCGTGACTAAAGGTGCCCGAAGGCCTTTAGTCGCGGTTGTCCTGGCCAACCGCGACTAAAGCCCCTCACGTGCACCAGCTGACCACCGAGCGCCCTGGGCCCAGGCCTTTGGTCGCGGTTCACCTCCAGAACCGCGACTAAAGGTCCCATTAGTCACGGTTCCTACAGCTTCGCGACTTATGGGGCTGGACGGAAGCCTGTTTTTCCACCAGTGTACACTTCCCTTTATTTGTCAGCTGGTCGACGTGTTATTTTCATAATTGGAGACAAAGTGGGCGGCAAGGAAGCATGCATGGTCGCAATGCAAAATTGGAGACCGGTGCAATGCCGCTCCACGTTCATCAAGTCTGACGCAGCTTCAGAATGGGTCCGCAACGACTCGGACCTAGGGCCAGTTCTTTTCACTCAATTATGAACAATCGCAGCCTTAGAATCAAAATTGTAAAAAAAATCGTTTCTTCCTAGGAATCATCTAAGGATTATCAGAATGAGTAGTGTATTTGAGAATCATGGAAACTTGACAATTCTAGCCAACCCCTCAAAAGAAAAACCTTTCTTTTTGAACTATTACCCCTGTTAAAAACACAATTTACGGCCGGAATGACACTGGGCCATCCCGAATTCCCGATCGAGCGAGGCCCCAAAGGGCGCGGTTTTTTTCCTGCGCGTTCCATGCACAGCGGCAATCCAGTCCGCTGGTCCGCTCGTGGGGATATGGGCTGCATGCAGGAAGGTACAGCCAGTGCCCCACTACTGTCGGTCTTTGTCCTCGTATTAACCTGTATATCGTTTTTTCACTGCGTCCCTGCCCGCCGGTATTCCATGTTTACTCTACGGCCCCACTTCTCATCGCCAGACGTGTCCTCCCCTCCCCCCCACCACCACCCATTATCACCCTCTATCTCGTTTTTCTCTATCCGGTCACAAGAGGAACACCACCTAGAGCAGCTCGTAATCCCCATTCTTTCGATCCAGATCCACTCCGGAGAAGCAACTTAGTGCATCGGCCCCGCGATGAAGACGCGGAGCACCCCGTCGGATTACCCGCTGCCGGCGAGTCTTAGCTGCTACACAGGAGAAGGAGGGAGCTCAATCATGGATCTGGATCTGGCCGATGAAAGCATTGAATCAGCCCCATCTCTCCAGGTTTTGAACTCCACACACACACTTCATCCCGATCCCCTTTTTTTGACCTGTTGTGTTCCGTATTATCCCGTCCCTCCTAATTGATTGACAACATGTACGCAGCCTGTTCGGTTTTTGGATGTTGAGCTTGGTGGGGCTGATATTCCAGACGAATTCCTGGATCCAGATTTCTGTGGTATAGACACTTCCTCTGACCACAGATGCCATCACGGACTTAATCCGGCAAGAAAGGTTGCTTACGCTAGCGCAACCACTGGGAGGAGGTTTCTCGGATGCCCTCAACATGTGAGCTTTTGTCTACTGCTGTTTCATTTGGTTTGTTATTTTATCAGCTTCGCTAGATTCTGAAATCATTAATATCTGAAGAAAAAATTAAATTCTCAGGGGAACGAGAGATGCAACTGGTTGAAGTGGATTGACGAACCATGGGGGCCTGTTCTTACACGCTCAATAATGCACCTATGGGGTAAATTTGCTATGTACCGCGATAAATCAGATGAGTTGGATGCCAAGAAGAAGGAAATGAACCAGGTTTACCTAGAGCTCTGGACTGAGAGAAGCAAGATGGAGTCTGAGCACAATCAGGTTGTCATCAATCTCAAGAACATTATAGTGGACAATGAAATTAAGATGGCCAGGAGGTTGGATTTCCACACTAAGCTGTGTGTGGCCTCTATTTCTTCAGTTGTTACTCTAGCAGCAGTCCTAGCTTATGTGTTGTCTCCCTAGTAAGGTCGTGTTTTTAGGGATCGTTTAGCTGATGCACTAAGCTGCTTCTCCAGATTGTATTATGATTATATGTTCCTCCTTTACCTCATTATAATACAGTATGGTATGTTGGAGTTCACCGTATCAAATTCGAGTTGATTTCGCATATCAATTATTCATTATGACATTTTTTGATGCATGTTGTTCTCTGCCCATTATCACTTATTTTACAGCTCCATCCTTGATTCAGATTCAGATTCCAGTATATATATTACAAACATTTGCTTTGTATGAAATGTTTCAAAAAATCGTGTGTTAACTTGACCGGTGTATCATTTGCAATTTGTTATCATGATATATACACATATTACATACACCTGTATTCAGACCGATCTTGGAACAAAAACATTTATGCAGTACCAATTTTTATTTACCCCCTCATGTTGCTTATCATCGTTTTCCCATTTGTTGTCTGTGTTGTTCAAGTCTGTTAATGCGGCCGATATTGTGTTATCATTTTAGAACGGAATGGTTCATTTTTTATTATCCAACCAGGTTGTGCCAGGTCCAGCCAATCGTATATATCGTTTTGCCTATGACTCTGGTGTAAGATTTAATCGACGACCTGGCAGAAGTTTGCAAGGTATTTTCTAATATTCCCCATGTTATATATTCCGTGAATATCAAATGTTAGTTTCCCGTCATCACCATGTGATCCTGTTTTTTTTCTTTTAGTTGTCTGACAGTATTA
>HvleckRLK74
GTCCAACTCGCGACATGGTTCAAAGAATTTTGCTCGCTCCAACCCGGAAGCACTGGTAAAGGGGGAAAGCTCGCTTCATCGCCCTACTTACCGTTCACAAATCCCAAGCACCATAGCCAAGGACAAAGAGACCGGCGAGCGGTCCTTCTCCGCCGCTGGTGATACGAGAGCCATGCTTCTTCTCGGGCTTTACCACTTGGTCGCCCTGCTCCTGCTCCTCGTTGCTGCGGGCCGCTGCCTCGCGGCCACCGGCGGCGGCGATGATGGCCGGCAGTTCGTCTACAACGGCTTCTCCGGCGCGAACTTGACGCTCGACGGTGCGGCCGGGGTCATGCCTAACGGCCTCCTCATGCTGACCGATGGCAGAAAGGTGAAAGGCCATGCCGTCCAGCCGTTCCCGCTGCCGTTCCGTACCGCATCGAACGCCGCCGGCTCCATGCGGTCCTTCTCGACCACCTTCGTCTTCGCCATCTTCGGTCCATACGAAGACCTCAGCAGCGACGGCATCGCCTTCTTCGTGGCCGCGTCCAAGGAGGTGCTCTCCGCTGCGTCGCCAGGCCAGTTCCTGGGACTACTAAACGAAGACAATATTGGCAACCGGAGCGCCCGCATCTTTGCCGTGGAGCTAGACACGTTCAAAGATGCCGAGCTCCGCGACCTCAACGACAACCATGTCGGGGTCGACGTTGATAGCCTGGTGTCAATCGATTCCGCCGACGCCGGATGGTACTATGATGACGGCACCGGGATGTTCCAGAACCTAAGTCTGATAAGCCGGAAGCCCATGCAGGTGTGGGTGGACTACGACAGCAGGGCCACGGATATCACGGTGACCATGGCTCCGTTGGGCGTGGCCAGGCCCAAGAGGCCCCTCCTGCAGACCAACGTCAACCTCTCCGGTGTAGTGCCGAACATGGCGTACGTCGGGTTCTCTTCGGCAACGAACTTCTTTTCCACACGACACTTCATCCTCGGCTGGAGCTTTGCCCTGGATAGACCAGCCCCTGCACTAGACATCTCGAAGCTGCCACAGTTACCATCGGCCTGGAGCAACTCACGGTCCATGCCAATCTCAATAAAGATCGTTCTAGCCTTAGCATCGGTGACGATGGTTTCGCTGGGCATCGGAATCTACATCTTTGTAAGAAGGCTGCGTCTCAAGTACTCTGAGGTGCGTGAGGACTGGGAGGTCCCGTTTGGCTCCAACCGATTTTCATACAAGGACTTGTTTCATGCGACCAAGGGTTTCAGTGACAAGAACTTGCTTGGGAGGGGAGGCTTCGGAAGCGTCTACAAGGGTGTGCTTCGAGAGCCTGAGATGGAGGTTGCCGTCAAGAGAATGTCACACAATTCAAGGCAAGGGGTAAAGGAGTTCATCGCCGAGGTGGTGAGCGTTGGTCGTCTTCGACACCGTAACCTCACGCAATTGCTGGGCTACTGTAGGCGGAAAGATGAACTTCTCCTGGTTTATGACTTCATGGAAAATGTTAGCCTTGACAAATACCTACATGGTAGAAACGACCAATTGCTATGTTGGTACCAGAGGTATTCAATCATCAAAGGTGTGGCATCAAGTTTGTTATATCTACATGAGGAATGGGAGCAGGTCATCATCCACAGAGATATAAAGGCAAGCAATGTACTCTTGGATAGTAAGATGAATGGAAGGTTGGGCGATTTTGGTCTTGCAAGGATCTATGACCACGAAACCGCCGCTGAAACCACCCATGTGGCTGGCACCATGGGATATCTTGCGCCAGAACTCTCGCGCGCTGGGAGGCCAACACCCTTCTCTGATGTGTACGCATTTGGTGTGTTTCTCCTAGAGGTCACGTGTGGACGCAAGCCAATCTTCATTGATGAGCAAAACAACCGGGTGTTGCTGGTCGAGTGGGTGCTTGAGCACCACCACAACGGCTCAATGCTCGACACGGTGGATCCACGACTCAGAGGGGAATTCAACACAGAGGAGGTAACCATTGTGCTCAAATTGGGTTTGCTATGCACGTACCCGTCGCCCAACGCGCGGCCAATCATGCGAAAGGTCATGCAGTACCTCGACCATGATCAATTGCCTCCTGATTTATCACCGGCCTACATAAGCTACATCATGATGGCACAAATGCAAAATGGAGGATTTGATTCGCACGACATGGCATGTTCTCAGCCTGCGATGAGTGTCGCCACTTTGTCGGGTGAGTCTTCAGTGACAATTTTACGAGAGGGAAGGTGAAGCATGTATGCAATTGCCCCCCCCCCCCTCTTCCTCCTCTCTGTTGATTTGATAAAGGATGTAAGGGGTTGTATTAAGAAGCTATGCTCTGTTGTTGGACTGCTCCGCCCCGCGTGTCTGAACTGGCCGATTTTCATTATTTGAATGTTGGGTAATCAATGTATGTATAAGTGATTAAGAAATATTTCAAGCAAAGCTTTGAAGGTTGGACCGTACAACTGCTCTGACAAATCATTGACCAGCTTGATGACATGTAACTTGAATCGGTAACAACAGATTGTGTTGAAATTTGG
>HvleckRLK75
GTTTATCTCAGTCTGCTCAAAAGAAAACGAGAGAGCAAACTTTGGCGAGAAACCATGCCAGCTCTTCTTCTGCTCCTGTCATTGAGCCTGAACGTAGCGTTAGCCTCCTCGGCCGACGCCGGCCAGTTCACCTACCAGGGCTTCGCGACGGCGAATCTTACCCTAGATGGTCTCGCCGTCGTCATGCCCAACGGCCTCCTCGCTCTCACAAACTTCACTTCCCAGGAGAAAGGCCACGCCTTCCACCCAGCCCCACTCCGCTTCCTCAACGCGACGGCGAGCTCCACGGCCGTGGCGCGGTCCTTCTCCGCGTCCTTCGTGTTCGCCATCGTGTCTGTCTTCGACAGCCTGAGCGATCAGGGCCTCGCCTTCGTGCTCGCCCCGACCTCTAACCTCTCATCGGCCAACGGCGGACAGTACCTAGGCCTCCTCAACGCGACCAACGGCACCGCGAGCGACCACATCTTGGCCGTCGAGCTAGACACCATCCGGAACCCCGAGCTGAGCGACATCAACAGCAACCACGTCGGCATCAACGTCAACAGCCTCATCTCGCAGCAGGCCAAGCCCGCCGGCTACTACGGCGACGACGACGACATGGCCTTCCGAGACCTGATGCTGATTAGCCGCAAGCCAATGCAGGTGTGGGTGGACTACGACGGCCACGGCAGGAGACTCAATGTGACATTATCTCCCGTGCAAGTTCCCAAGCCCAAGAATCCTTTGCTCTCTGAAACCATTGACCTCTCCACTATCGTGGCGGACACGATGTATGCTGGCTTCTCATCATCGTCGGGCGTGGTGTCCACGCACCACTACGTCCTCGGATGGAGCTTCAGCTTCGACGGACCTCCTCCGCCGCTCGACTTCTCTAAGCTGCCCAGCCTACCGCGTGTGGGTCCCGAACCTCCGTCCAAGACCCTGTACATCGCTCTACCATTAGCAATCATATTGCTCATCGCTGCAGTCTTGGCTGTTGCGTTCATCGTGCGGCGTCGGCGTCGGTTCGCTGAGGTGCGCGAAGACTGGGAGGAAGATTTCGGCCCACACCGATTCGCATACAAGGACTTGTTCCATGCCACAGACGGGTTCAAGAACAGAAATGTGCTCGGTGTTGGAGGGTTTGGAAAAGTATACAAAGGGGTCCTTCCGGTGTCTAATTTGGAGATCGCCGTCAAGAGAGTGTCGCATGACTCAAGGCAAGGAATACGTGAATTCATTGCCGAGGTGGTGAGCATTGGTCGTCTCCGGCACCGGAATCTCGCGCAGCTGCTAGGCTATTGCCGGCGCAACGGTGAACTTCTGTTAGTGTATGACTACATGGCAAATGGCAGCCTTGACAAGTACTTGTACAATAAGAATGGGCCACCTCTATGTTGGCCTCAAAGGTACTGGATTATCAAAGGCATCGCGTCAAGCTTATTGTATCTCCACGAGGATTGGGAGCAAGTCGTCATCCACCGAGATATAAAAGCAAGCAATGTGCTACTGGATAGGCAGATGAATGGACGGCTCGGTGACTTTGGTCTTGCAAGGTTATACGACCATGGCACGGATGCTCAAACAACACATGTCGTTGGTACCATGGGATACCTTGCGCCAGAACTCATGCGCACGGGGAAGGCAACACCCTCAACCGATGTATTCGCATTTGGTGTGTTTCTCCTAGAGGTCGTCTGTGGGCGCAGGCCAATCGGGAGTGATGAGCATAACAATCCGGTGGTGCTGGTCGACTGGGTGCTTGAGCACCACCGCAATGGCTCAATCATCGATACTGTGGATTCCCGGCTCGAGGGAAATTTTAACAAGGAAGAAGTAAGTATCGTGCTCAAACTAGGTTTGTTGTGCGCGCACCCATTGCCAACCGCAAGGCCTAGCATGCGAAAGGTCATGCAGTACCTCGACGGTGACCAAGCTGCCCCTCATTTGACTCCGACCTACATGAGCTACAACGAGATGGCCTTGATTCAGAGCGAAGGGTTCGATTCATACATCACACCATGCCCTTCACCGGCGATGGGCATTTGCAGCGGATCTGGTGAGTCTTTGGTGACAGTTCTGTTCAGTGGAAGATGAAGCGTTTCTCGTAATTTACAGCTATTTATGTTTTCTCTTGCTCCCTCTTTGAAGGATTAGTTATCTTATGCTCTACGATCGCTCTTTTTGTTTGCACGTCCCGTCGTCCGAAAGGTCCTTCAGTCGGAGGAGATCTTTTTTGTAATCTATAAACCCGTGTTATCATAATGGAAAATTACCGTCCCATGTATTGATTTCAGTAGTATTGGTAGATGGATAGCTAGGACCAATGCACACTTCTTATAGAGTACACCTAGTAGGTAAATTTGTTTGAAAAAGGTTTTAGAATATTTT
>HvleckRLK76
CAATCTTACACAAAAACTGAGGGTTCGCTGTAGTATGCAGTTAGAAATTTGACGAACCTGGCTATAACCAAAGAACCAAAGAGAGCGTGTCTCACTGTTTCCTGCGCCACAGACTACAGCACACTGGCTCATCCGGCCATGTTTCTCCAGCCTCACCACTTGGTCACTCTGCTCCTGCTCCTGGTGGGCGCCGATCTCTGGCACCCGGCCACCGGTGGTGGAAGCAGCAGCGGCGATGACGGTCGGCAGTTCGCCTACAACGGGTTCGTGGGTGCCAACCTGACGCTCAATGGCGGCGCCACCGTCACGCCGAAGGGCCTCCTCATGCTGACCGATGGCACCCTTCAGATGAAAGGCCAGGCCTTCCACCCGTCCCCGCTGCCGTTCCACGCCGAGGCTAACGGCACCGGCGTTATGCGGTCCTTCTCGACCACTTTCGTCTTCGCCATCTTCGGGCCGTACGCCAACCTGAGCAGCCACGGACTGACCTTCTTCGCCTCAGCGTCCAGGGATGTGCTCTCCACTGCGCTTCCAGGCCAGTTCTTGGGCCTCCTCAACGGCACCAACGGCAACCAGACCGCCCCTATCTTCGCCGTGGAGCTCGACACTCTCCTCAACGCCGATTTCCGTGACATTAGCAGCAACCATGTCGGCGTCGACATCAATAGTCTGATATCCATCGATTCCGCTGACGCCGGATACTACGATGATAGCACAGGTAGGTTCCAGAACCTAAGCCTGATCAGCCGGAAGGCAATGCAAGTGTGGGTGGACTACGATGGCGTGGCCACGGAGATCACCGTGACCATGGCTCCCCTGGGCGTGCCCAGGCCCAGGAAGCCGCTCCTGCGGACCGCCGTCGACCTCTCGGGTGTGGTGCAGAGCACGGCGTACGTTGGATTCTCGTCGGCGACGGGCGTCATGTCCACGCGCCACTTCGTCGTCGGCTGGAGCTTCGCACTGGACGTGCCAGCCCCGGCACTGGACATCTCGGCGCTGCCGGTCTTGCCGCGCGCCTGGCCCAAGCCGCGGTCGAGGATCCTAGAGATTGTGCTGCCTATAGTGTCAGTGATGCTGGTTTTTGCAGTAGGCATCGGAGTGTGCTTCTTTGTACGACGGCGCCACAAGTACTCCGAGCTGCGTGAGGACTGGGAGGACGCGTTCGGCCCCCACCGATTCTCTTACAAAGAATTATTTCATGCGACCAAGGGGTTCAGCAACAAGAACCTGCTCGGAGTAGGAGGCTTTGGAAGTGTGTACAGGGGTAAACTCCGCAAGCCTGACAAGGAGATCGCCGTAAAGAGGGTCTCCCATGAGTCGAGGCAGGGGATGAAGGAGTTCGTTGCCGAGGTTGCAAGCATCGGACGACTGCGGCACCGGAACCTCGTGCCGCTGCTTGGTTACTGCCGCCGCAAGGCGGAGCTTCTCCTGGTTTACGATTACATGCCAAACGGAAGCCTTGACAAATACTTGTATGATGCGTCAGTGGGTACACTGGATTGGCGTCAAAGATTTCACACAATCAGAGGGGTGGCTTCTGGGTTATTGTACCTCCATGAGGATTGGGAGCAAGTTGTCATCCACCGAGATGTGAAAGCAAGCAATGTTCTCCTAGACAGCGAGATGAATGGGCGGTTAGGGGATTTCGGCCTTGCAAGGTTGTACGATCATGGAGCAGACGCCCATACAACACATGTGGTTGGCACCATGGGCTACCTAGCTCCCGAGCTAGGACACACCGGCAAGGCAACCCCGTCTACCGATGTGTTCGCTTTCGGTGCATTCCTTCTGGAAATCATCTGTGCACGGAGGCCAATTGAGCAAAACGACCGCAACAGCCGCATCGTGCTCGTGGATTGGGTGATCGAGCAATGGCGCAACGGTTCGATTATTGATGTGGCAGATACAAGAATTCCAGATGGGTTTAATCCGGACAAGGTCTCACTGGTACTGAAACTAGCACTGCTCTGCTCGCACCCTCTGCCCACCGCGAGGCCAACCATGCGGCAAGTCATGCAGTACCTCGACGGTGACATGCTCCTCCCAGACCTGTCACCGGCGTACCTCAGCTTCAGCATGCTGGAGCGGATGTACAACGGGGAGTTCAACCAGAACGTGATGCCATACACTTCATCAACGAGCGTAGGTGCCATTTCTGATCTCTCGGGAGGAAGGTGATGAGGTTCTTGCACTGAGTAAAAAAAGTGCAATTCTGTAATTGACAATAGGAGCTCCGATGTATCTATGGTATACCAATATTGTGGCTTATCTTTCTTATGACTGAAATTCAGGATTATATAATAAACACACGACACAATGTTGTCAAACAAGTGATATCTATTTTTCAG
>HvleckRLK77
ATGAGATCGAGAGCCACGGGAACTTGCTTCATGGCTCTCCAGTTCGTCCTATTCTTCACTTTCAATATTGCCGGCGTCAGTCCTCTGTCCTTCAAGCTGAATTTCACCGAATCCAACTATACTGCGTCCACCGCAATCAAGTTCCAGGAGGACGCCTTCTACAACAAGGGGATCAAGCTCACCAAGGACCAGCTCAAAGACCAGATCACTAACAGTGTAGGCCGAGCAGTCTACACCGATCCAGTGCTTCTCTGGGATACCGCCACTGGCCAGTTAGCCGACTTCTCAACCCGTTTCACCTTCAGGATCACTGCCACAAACACAAGCGCAACCGACGATCCATACGGTGAGGGCCTAGCCTTCTTCCTCTCACCATACCCTTCTGTGGTTCCCAATAGGTCCACTGGTGGTTTTCTTGGCCTTTTCAGCAATGGGAGTGATCAGAATGACCCATCTAATGAGCTCGTGGCTGTTGAGTTCGACAGCCACGATGACACATGGGATCCAAAAGGCAACCATGTGGGCATTGACATCCATTCAATTGTATCCGTAGCCCACGTGGTGTGGAATAGTAGCATTAATGATGGTCGCATAGCCAATGCGTGGGTAAGTTACAAGGCCAGCTCCTTGACCTTGAGCGTCTTCTTGACGTACCTGGGGGATCCACAATTCAGTGGCAACTCCAGCTTATCTTATTCAGTTGATCTCAGAAAATACCTCCCAGGCAAAGTGGCCATTGGCTTCGCAGCTGCCACGGGTAGATTCGTTGAGCTCCATGAGATACTTTTCTGGGAATTCAATTCTACGGATTTGCAGCTGATGAAGACTGAGAAGATGAGAAGTGTACTGGTCATAAGCTTGGCTACTACCATAAGTGTCGTGGTCTGTTCTATGTGCTTGGTTTGGTGCCTTCTGCATTTTAGGACTAGAAGATCAAGAAATGAGAAACAAAAGAAGCTAGGGTATCATGAGTCCATTGATGGTGAATTTGAAAAAGGGAGCGGCCCAAGAAGATTTCGGTACAATGAACTTGTGGCTGCCACAAGGAACTTTGCTTTGGAGAGAAAGCTTGGAGAAGGAGGATTTGGCGCAGTCTATCAGGGCCTTTTGAAGGATCAAAACCTAGATGTTGCCATAAAGCGAGTGGCAAAAGGGTCTACACAGGGAAGGAAGGAGTACATATCTGAGGTCAAGATCATCAGCCGGCTGAGGCATCGCAACCTTGTGCAGCTTGAGGGCTGGTGTCATGAGCATGGAGAGTTTTTGCTTGTCTACGAGTTCATGCCAAACAGGAGCTTGGACACACACCTCTATGATAACAGTAACTTGCTAACATGGCCATTGAGGTTCAAGGTCACCGCAGGTGTTGCATCTGCCCTCCTGTACCTCCACGAGGAATGGGAACAATGTGTCATTCACCGTGATATCAAACCGAGCAATGTCATGCTTGATTCGGTATTCAATGCCAAGCTTGGTGATTTTGGGCTCGCGCGGCTCATTGACCACGACCGAGCCTCGCAAACTACAGTGTTAGCTGGGACAATGGGTTACATGGCTCCAGAGTGTGTCACCACTGGCAAGGCAAGCAAAGAATCTGATGTCTACAGCTTCGGAATTCTTGCACTGGAGATTGCATGCGGAAGGCGACCGGTTGTGCTAAAGGAAGACGATGACAAGGTTATATTGGTTCAGTGGGTATGGGATCTTTATGGAAGAAACAAGATTCTTAATGCAGTTGACAGCAGGCTTGACGGTGCATTTGAAGATAGAGATGCAGCATGCTTGATGGTTGTCGGACTGTGGTGTGCACATCCAGATTACAATCTTCGACCTTCGATTCGTCAGGTCATAAGTGTACTGAAGTTTGAAGCACCATTGCCAATCCTTCCCCCGAAGATGCCAGTGGCAATGTACTTTGCACCGCCAATTTCTCTGTGCAGGTTTTCATACACCTCATCTGATGGAACACTCAAGCAGCAGGAGCTGGAGAGGTCCAATGGTTATGGAAAAACAAGCTCATCCACTACAACCAATGCATCCAGTTCACCTCCTTCTGTGCGGTTGCCAGAGGTGGGCTACTAA
>HvleckRLK78
CCGGAATCGTTGACGCAGCGACCCTGTTGACCTATCAGGATGAACGGGTAGCGGACAAGGACAAAGCCAAGAGCTCGAGAGACATCACGGCTCCGGGAAGACGCGTCCATCCACACATGTGCGGTCGCTCTCACACGGGCCCAGGATTAGGCGGGACCGAAGATTAGATTTTGCCTTGCTCCTCTCACTCTCAGAGCCTCACCATCCCACCAGGATCTGTGCTCATCTCCACGTTTACATCCGGTCAACTTCACACTACTTTTGGGTTAAGTCTTAAGCCACCCACCCACACGCACACAAGAGTAGCAGTGACGCTATAGAGCCCAGCCACGCCGCTCGGCGTTCGCTTCAATCCACCCGCTGTGTCTGCGGAGGGCGGACGGCAGAGATCCAGAGACCATGCCGCCTCCCGACCGAGCCATGCCGCTCCTTCTCCTGCTCCTCTTCCTCGGCCTCGGCCCGGCGGCGGCGGCGGACGAGCAGTTCGTCTTCGACGGGTTCACCGGCGCGAACCTCACCATGGACGGCATGGCCACGGTGACCGCGAACGGGCTGCTCCAGCTGAGCAACGCCACTAGCCAGCTCAAGGGCCACGCCTTCTTCCCGACGCCGCTGCAGTTCCACCGGGCGCCCAACAGCACGGCCATGCAGTCCTTCTCCACGGCCTTCGTCATCGGCATCATCGGCGCCTACGACACGCTCAGCAGCCACGGCATGGCCTTCGTCGTCGCCAAGAGCCGCAACTTCACCTCCGCGCTGCCGGGCCAGTTCCTGGGCCTCGTCGGCTCCGCCAACAACGGCAACGCCACCAACCACCTCTTCGCCGTGGAGTTCGACACCATCCTCAACTCCGAGTTCAACGACATGAGCGGCAACCACGTCGGCATCGACGTCAACGGGCTCAACTCCGTCGACGCCGACAACGCCGGCTACTACGACGACGGCACCGGCGCCTTCAGGAACATCAGCCTGGTGGACCGCAAGCCGATGCAGGTGTGGGTGGACTTCGACGGCCAGACCATGCAGGTCAACGTCACCATGGCGCCCCTGCAGGTGGCGAGGCCCAAGAGGCCCCTGCTCTCCACCACCGTCAACCTCTCCTCCGTCATCGACGACACCGCCTACGTCGGCTTCTCGTCGTCCAGCGGCATCCTCTTCTGCCGCCACTACGTGCTCGGGTGGAGCTTCAAGATGAACGGCGCCGCCCCGGCGCTCAACATCTCCTCGCTGCCGTCGATGCCGGTCACGTTCCCCAAGCCGCGGTCCAAGACCCTGGAGATCGTGCTGCCGATAGCGTCGGCGCTGCTCGTCTTCGCGGTGGCAGCCGCCGTCTTCGTGTACATGCGGAGGCGGCGCATGTTCGCGGAGCTCAAGGAGGAGTGGGAGGTCACCTTCGGGCCGCACAGGTTCTCGTACAAGGACCTCTACCACGCCACCGACGGGTTCAGCGACGAGCGGCTGCTCGGCATCGGCGGGTTCGGGAGGGTGTACCGCGGCTCGCTCCCCAAGTCCAAGTCGGCGGAGATCGCGGTGAAGAAGGTGGCGCACGGGTCGAGGCAGGGGATGAGGGAGTTCGTGGCGGAGGTGGTGACCATCGGCCGGCTCCGGCACCGCAACCTGGTGCAGCTGCTGGGCTACTGCCGGCGCAAGGGCGAGCTGCTGCTGGTGTACGACTACATGCCCAACGGCAGCCTGGACAAGCACCTGTACGGCGACCAGAAGGAGAAGGCAGCCCTGGGGTGGGGGCAGAGGTTCGGGATCATCAAGGGCGTCGCGTCCGGGCTGCTGTACCTCCACGAGGACTGGGAGCAGGTGGTGGTGCACCGCGACATCAAGGCCAGCAACGTGCTGCTGGACGCCGACATGAACGGCCGGCTCGGCGACTTCGGGCTGGCGCGGCTCTACGACCACGGCACGGACCCGCACACCACGCACGTCGTGGGCACCATGGGGTACCTGGCGCCGGAGCTCGGGCACACGGGCAAGGCCTCCAAGGCGTCCGACGTGTTCGCCTTCGGGGCCTTCATGCTGGAGGTGGCGTGCGGCCGGAAGCCGGTGGTGCTGGACGCGCGCGACAACCACCTCGTGCTCGTGGACTGGGTACTCGACCAGTGGCGCGCCGGCACCGTCACCGGAGCCGTCGACCCGCGCCTGGGCGGCGACGTCGTGGAGCACGAGGCGGGCCTGGTGCTGAGGCTGGGCCTGCTGTGCTCGCACCCGCTGCCCGCCGCGCGCCCGACCACGCGGCAGGTGGCGCAGTACCTCGACGGCGACCTCAAGCTGCCGGAGCTATCGCCCACGTACCAGAGCTTCAACATGCTGGCGCTTATGCAGGACCAGGGCTTTGATCCCTACGTCATGTCCTACCCGATGACCTCCATCACCGCCGGTACCATGTCCCAGATGTCCGACCTCTCCGGAGGAAGATGATCCCCTATAGCTCTCGTCGTCGTGAAACTAGAACTACCCGTCTTTATTAAAAGTCTATATATGTTTTGTCTATGTTCAGAACCGGGTGCGTTTTTTCTGTTTGGTATATGGATCATAACCTGAATGTTAAGAACCGGGTGCATTTTTTCTGTGTGGTATATGGATCATAACCTGAATGCGAAGTGTTGTGCAATCATGCTCAGCATTGTTTCATGTTCAGATGATATATTACCGACCGAAAAAGGGAGATTTGGGTGTTTGATCTCCCACTGTGCTCTTACCAGCTTTGTCAACTAATGTAGTGCTAGGAGTTTCTGAATGTAAACCATGATGCTGATCCCCTCCAAATCTGAATATTTATGCTAGGAGCAGTAGTGATCCTGATGTTCCCAATCACCCATGGCACAAGATGACGAGTTCCAAGCGTGTTGAACATATTTTTATTCAGATCCATTGAACATTTTTTTTATGTAAATATGGTTTACTCTCTTTCTTAACACATAAAGTTTTGTATTTTGATGAAAAAATTACTGATCAGTAAAAGTGGTTTGAATTACCCCAAAAAAGACATTGGTCTGGGCATCTAGAAGACGGCAACCAGG
>HvleckRLK79
CGGCTGTATCTGAAGAGTCCCATTGACTCTGTCTCCAAGTATTTGTCAACTCCTCCCCTCCTCTGTATTGAAAAGCAAATCACCCGGATCATATGAGCTGGCATATTCCTCTTTCTTGAGATGGTTGCAGGAAGCCATCGGAACCATTTAGCCATGCCAATACCCAATACCAACAACATCTTGAGCTTTTCCTGTATAGCGTCTGCAGCTGTTGTCATCCTAGGCAGAACTTGTAGCTGCTTGCAGTTCACTTACCCCAGCTTCAACGCAAGCAACAGGGATGATTTCAGCTTCAGCCCAGGCTCAGCAATCTCAAACAAGTCGCTGCAGATCACGCCCAACACCGGGAACATGAGCCACCGGTCGGGAAGAGTGGCCTATGCAAGGGACACCCTCAAGCTGTGGAACAGCAAGCGGACGGAGCTCACGTCGTTCAGGACAGAGTTCGTGCTCAACATCCTGCCACAGAACGGGACTGGAGAAGGTATGGCCTTCATGCTCACAAATAATCCATCTTTGCCCAGCAACAGCAGCGGCCAGTGGCTGGGCGTGTGCAACAACCGCACAGACGGCGCGAAGACGAACCGGTTAGTAGCCGTGGAATTCGACACGCGGAAGAGCTACAAGGATGACCTTGATGGCAACCATGTTGGCCTCGACTTGAACAGCATCAAATCTGTTGAGCAATACCCACTGAGCAATCAGTCCATCGTCCTCTCAAGTGGGTCTGATGTATTGGTCGGGATCAATTACGATGGTGCATCACTGCTGTTTCGAGTAACTCTCGTCCAATACAGCACAAGTGGGCAGCAGCATGTTTCCCTGTTAAGTCGGTACATTAACCTGTCAGTAGTTTTACTGGACGACATATATCTGGTGTTTGCAGGTTCCACGGGCAATTTCACCCAACTGAACCAGATAAAGTCGTGGAACTTCACCACAATAGATGACGATGCCACAGTTAGAAGAGAGCATTATTGGAGAAGAAAGTTGCTTTTGGCTCTCGTTACATTGCTTGTGCTTTCTATATGTGTGTTTGTCGGGCTGTTCATGTGGAGAAGGTTGACGCGGCGGAGAAGGCTTGCCTACCATAACCTGGAGAAGATGATCGACGCACACGGTCCTGTCAAATTTAAGCTCAGGGAGCTCAGGCGTGCGACTGCCAACTTCAGTCCTACCCGCAAGCTCGGCAGAGGGGGCTTTGGCACTGTTTACCTTGGATACGTGGATAGGATGAACTTGGAGGTGGCCGTCAAGCGGGTGTCGACGGACAAGAAGGCCGACACCAACCGCGGCGAGAAGGAGTTCGTGGCGGAGGTGAACACGATCAGCAAGCTGTCGCACCGGAACCTCGTGAAGCTAATCGGCTGGTGCCACGAGAAGGGCGAGCTGCTGCTCGTCTATGAGTACTTCCCCATGGGCAGCCTGGACAAGCTCCTCTACGCCAGAGAAAGGACCATGGCGTCATCGTCGGCATCCAGATCCAGGGACACCCCGGAGCCGGAGCTTACCTGGGAGCGGCGGTACAAGATCATCTGCGGCGTAGCATCGGCGCTGGACTACCTGCACCACGGGAGCAGCAAGCGGATCCTCCACAGGGACGTCAAGGCCAGCAACGTGATGCTTGACGCGGAGTACAACGCGCGGCTGGGGGACTTCGGCCTCGCCCGCGTCATCCAGCACGACGGCGTCACGCACCACTCCACGCAGGTCGTGGCGGGGACCCGCGGCTACATGGCGTACGAGAGCTTCTTCACCGGCCGCGCCAGCCTCGACACGGACGTGTACGCGTTCGGGGTCTTCATCATGGAGGTGGTCAGCGGGAGGAGCCCCAGCAACGCCGTGCAGCAGCAGCACATGCACAACAGCGACCACCATGGCGAGGAGGATTACTCGAGCAGCGGGGGAGCGCGGCACCCCATGCCGGTGCACATCGTGGACTGGATATGGAGGCTCTACGGCGAGGGGAAGGCGTTGCATGCCGCCGACCCATTGCTCGGCGGCGAGTTCGAGCAGGCGCAGGTGGACTGTGCGGTGAGGCTGGCGTTGGCGTGCTGCCACCCGAACCCGAGGGAGAGGCCGTCCATGAGGACGGCGGTGCAGGTGTTGATCGACGGTGCCCCGGCACCGGAGCCGCCGGTTAATAAGCCAGCGTTCGTTTGGCCTCCGGGCGGCAATCAGCGGGAGATGGAGCTGCCGGACGTCGGGTTGCTGTTCACGGGAGGGGCCAGGCAGCACAGCAGTTTCTGCTCCATGACCTCCACTTCCCTCGCGGGGAGGTGAGCTCCATTGATAGTTGTACGCTTGCCTTGTAAAATTGTACGTTATGTTCGTCGCTTCTCTCCGCTGCACGAGTGTGCTGTTCGAAACGAGCTAGGAACAAAGTTTGTAATCTACTCTACTGACAGATATCTGAGTGAGGATATTTTTTCTAAATGGAGCACTTGTGTTCAATTTAAGACACACAATACGGGCGATGGTAAACATGGACCA
>HvleckRLK80
GGAAAGCATTGGCGGCTGGGATCGTGGTGGTGCCTCGTGGCTATAGGAAAGTGGGCTGGAAAAGTCTCATCGATCTTCGTCTCGTCTCACCCTCGTTCCTTGTTCCCTAATCATTTGATATTTAGATCTATGTGATTAAGGATGACAGGGCGACGGGCTGCTGTTCTAGTTGCCTTCATCGTCTCCTCTTTTAAATTTTAGATTTGTTCACCTCGTCTCTTCAGATTAATCGGTGGCTAACTCTAATCTCTCGGTACTCAGTGAGTCCTTTTTTTTATTAAATCTACTAGTTTTCTCATTTCATAATTGCTCGTTGAATTTGGATAATATATTTACACACATCTGAATATATTCTAGATCTTTCAATTTTTGTAAGATAGGGCCTCAGGGTCCCGAATTTTGCCGGCCCGAACCTGGCAACATACATATATTAGGTACTAAACAACGTCCCTCTTACGGCAGTCTTTATTGCAGTCTACGTACTACTCCAGGAGTTTGGTGTAATCTGCAACCTATAAATCGCCAACCACGCTGCAAGCATGCAACTGCAGAACCACAGTGCGCCGTATGCAAAATACAAATCCCTTTTCTCTGAACTTTTCTGCAAAATACAAGCCCACAAAGCTATGAGTAGCACAAAGGTTATTGTGTCTTTCCTCCTGCTTCTGCTCATAAGCCTTTACCTCTTAGACTTCAGTACTGCCAGTGGCAGCTACCCTGAGCAATTCATCTACACCGGCTTCACCGGCGCCAACCTCACCCTAGACGGCTCAGCCAAAGTCATATCCAGCGGCCTTCTCGCCCTGAGCAGAGATAAATTAAGGAAGAACGGGCACGCATTCCACCCAGCTCCTATGCGCTTCCGCCATTCTCCGAATGGCACGGTGCAATCCTTCTCTGTCTCCTTCGTGTTCAGCATCCTCTCATCGTTCGGTGACATGAGGGGCCATGGCTTCGCTTTTTTCATCGCCCCGACCATGGACTTATCCGGCGCTTTCCCAATCCAGTTCTTGGGCCTTTTCAATGGCACCAACAACGGTAGCCTGAGCAACCACCTCTTTGCGGTCGAGCTCGACACCATACAGAACACCGAGGTTGGGGACATTGACAACAACCATGTTGGCATCGATGTCAACAGCCTCAACTCGGTGAAATCTTTCACTGCTGGCTTCCACAATGATAGTAAGAGTGATTTGTTCACAAGTTTGCCCCTAATTGGAGGTGGACCAATGCAAATTTGGGTGGATTACGATGCAAAATCCACACAAATTAATGTAACCTTAGCTCCTCTTGGCATGTCAAAACCTGTGAGGCCACTGCTCTCAACAACCTATGACCTCTCAGCCGTTCTAACACAACAAGCATATCTCGGCTTCTCATGCGTACCAGGGTCCAGCACAGGGCATCACTATGTGCTTGGTTGGAGCTTTGCCATGAATAGCGTGGCTCCAATCATAGACCCAACCAAACTACCCGAGCTACCCCAACTACCTCAACTTGGTCCAAGATCTCAGTCAAAACTCCTAGAGACTATTCTACCAATAGCTTCTGTCGTTTTAATCTTAGCTATTGGCATTGTGGGTTTTCTAAAGGTGAGGAAAACATACATGCATAAGGAGGTGCGTGAAGCTTGGGAGGTTGAATATGGTCCACACCGGTTTGCTTACAAGGATTTGTTTGGTGCCACCAAAGGATTTAAGGACAAACATTTGATAGGCGCAGGTGGGTTTGGTCGGGTATACAAGGGGGTCATTCCAACATCTAAACTAGAAGTCGCTATAAAGAGGGTAGCATATGACTCGGAGCAGGCCATAAAGGAATTCGTTGCTGAAGTTGTAAGCTTAGGCCATCTTCAACACCGTAATCTTGTGAGATTGCTTGGATATTGTCGGCGAAAGGGTGAACTTCTTTTGGTGTATGACTACATGGAAAATGGAAGCCTTGACAATCAATTGTATGGTCAAAGCAGTAAACCCGGTTTAGATTGGGGGCAGCGGTTTCGGATTATAAAAGACATTGCATCAGGCTTGCTCTACCTTCACGATGAATGGGATAAAGTCGTCATTCATCGGGATGTTAAAGCAAGCAATGTGCTACTTGATGAAGAGTTGAATGGACGGCTTGGAGATTTTGGCCTCGCAAGACTCTATGACCATGGCAATAACCCACAAACCACAAATGTTGTTGGCACGGTAGGATACATAGCTCCAGAGGTACTACACACAGGCAAGGCGACCACCCTTACAGATGTATTTGGCTTCGGCGTCTTTGTTCTCGAGGTTGTTTGTGGACAAAAGCCTATAAAACAAGATTCAGAAGGCAACCAGCTCGTCTTGGTCGACTGGGTGCTTCAGAACTGGCACAAGAAAACAGTCCTGGATACTGTTGATATCAAGCTCCAAGGAAACTATGATAACAAGGAGGCGTGTCTTGCACTAACGCTGGGATTGTTATGCTCGCACCCATTTCCTGACTCAAGGCCAAACATGAGACAAGTTATGCAATATCTCGATGGTGATATGCCACTTCCAGAGCTACATCCCTCATACTTCAACTTTCACATGTTGGCCTTGATGGAGAATGAAGGATTCAATTCATACATAGTGCCCCCGCATGCATAAGATGGAGAATAGGGGTGCATGGTTTGGTTGCCTCTAATGTACTTACTTATGACATTCAATGTATAGTCTTGTTTAAATATGGAATGCCCTCAGAATATACACTTTTTGTTTAAGTTATGTTGTAAGAAAATTCTATCGGGGCAATATATATAGATGGTCGTGTATTAAAGTTTCATTGAGAATGCAATGGTTGTGATGTGTCATGTTACTGGTCTGTGAGTGAAAGTAAATTCATTATCTCTATTTCTATTGTTTTGGGCAATATTACAAAGTGAATAGAACCCATACGTTGAGCAGGTATTGTACCTCAGATCCGTCTATAATAAAAGTTGATGAATTTGAAAAAAGCTCAACCATTCAGAAAAGGTTCATGAATTTAAGAAAATGTTCATGGATTTTAAAAAGTTCTAAATTTAAGCAAATGGAAAAGAAAAGACAAAGAGAAAAAGAAAAAATGCATAAAACGAAGAAAACCAGACAGAGAAGACGTAAAACAAGAAGAAAAAAGAAAGTAACTAGGTACAACACGCTTTCTTTCCCAGCTGCTTAGTGGCCTAGAAATACACCAGGAGGATGAGAGTTCAAACCCCACAACACGGCATTTGAGGGGAAAATGTCAAAGATGTAGCTTTCTTATCTTCCCTATCGATGTATCTTTCATATCCTCCTTATCATTTAGGCGCCGGTCCAAACACGCAAAGAAAAACATCACTTTGACGAGAAGCCCAAACACCTAGAGAAATTTCCGGGCCAGGTTATCATCATATTATGTTCTCTATTCCAGTGTGGACATAAGGAAATTGTATTCTGACGATTGACTTGTACATATATGCAGCAAGTCTACCCGCCTTGTTTCAATAAATTGAGGACTGTACTTGAGTGCCAAGCGCTTAGTAATACTTTTGTCCTAGACTAGAAATTTCGGGGCCAGGTTATCATCATATTATGTTCTCTATTCCGGTACTACATGCTCTATAATATTACACAACGTAAGGAGGACTATGTGGCCTCGGTACTACAATCGGTACCTCTTAACATGCAGTTCAGGCGAGCTCTAGTGGGAGCACGCTGGAATGCATGGCTGCATCTGGTAAGGAGACTTATGCAGGTACAGTTAACGGACCAGACAGATAGTGTTTGTTGGATATTGGCTGCTAATGGGGTATTCTTAGTAAAGTCCATGTATGTGGATCTCATAAACACCGGACCTTTATCCAGATCATTGCATATTTGGAATATCAAAGTGTCGCTCAGGATTAAAAAGAATTATGTAGTTTATACACAAAAATGTGGTATTAACCAAAGATAACTTAAAAAAACAAAGATGGAGAGACAGGTCGAATTGTTGCTATTGTGAGCAGAATGAAACAATAAGACACCTCTTTCTTGATTGCTCACTTGCAAAACTACTATGGCGCATCATTCAAATCGCTTTTAACATTACCCCACCTACATGTATTAACTCCCTATTTACAACTTGGCTCAATGGAGTGGAGGTTGAAATAGCGAAACTTATCAGGATTGGGATTTGCGCGTTATTTTGGACTATATGAAACACCAGGAATGACATGATTTTTAATGGCAAGAACTTCAACAATTTTTTGCAGGTTATCTTCCGAGCGACGTCTTGGATCCGTACGTGGTCATTACTCAGTCATGCGGCCTCCAGGGAGCTTATGGATATTGGGTGCAACCGATGGAAGATGGTCGCACGGGTTATCTTCAACCGATTTGGATGGCATGCTACTAATAGGATAGGTGTATAGGCATCATAGTCTGCTTTTAGCTATGCCGGATGTGGCTTTTTTTGCATATCATATTTGTTTTCATTTTTACTTCAAGCTGCAGAGCTTGGTGGACCTGAAACACTATTTTGAACTATTTTAAATAATATGGTTGCATGCATCGATTGATGCAGAGGCCGGGGGCTCGTTTCCTCCTTCTCTAAAAAAGATGTTCTCTATTCCGGTGTAGACGTAAGAAAATTGTATTCTGACGACTGACTTGTATATATATGCAGCAAGTCTACCCTTGTTTCAATAAATTGGGGACTGTATGTACTTGAGTGCCAAAGATGTGGCTCTCAAATCTTCCCTATCATTTAGACGCCGGTCCAAACAGGCAAAGAAAAACATCACGTTGCAATTCAAACCCCACAACACATATTTGAGGGGGAAATGCCAAAGATGTGGCTTTCGTATCCTCCCTATCATTTAGGCGCCGGTCCAAACACGCAAAGTAAAACATCACGTCGACAAGAAGTCGTGACAAATGGGAAACACGCTCAGTAATACTTTTCTGCCTGACAACCATCGATGGTGAAGCGCGCTCAGTAATACTCCCTCCGTCCGGAAATATTTGTCCTAAAAATGAATATAATGAATGTGTCTATAACTAAAATAAGTCTAGATATTTAGGACAAGTATTTCTGAACGGAGGGAGTACTTTTCTTCAGGACTAGAAATGTTGCCACAATATTACGTTCTCTATTCCAGTGTGGAGTGGACATAAGGAAATTGTATTCTGACGACTGACTTGTACATATATGCAGCGAGTCTACCCTTATTTCAGTAAACTGGGGACTGTGTACTTGAGTGATACCACAATTCACCTCTACAGTTACACTCATCTTTTTAGACTGCATACATAGTCTAAGAAGGCACTTCAGTTCCACACACCTTCATTGAGTTAGTTGTAAGTTATGGAGCATCTAGCCTTCTGCTTAACCTTCCTCCTCTCGGTAACCATATTCCTTGCATCCTCTGCCACCGCTAGTGAAGATGACCAGTTCATCTATTCCGGCTTCTTTGGCAGCAACCTTACCCTCAATGGTGCAGCCATGGTTACAAAAGATGGGGTCCTTGAGCTCACCAATGGGAAGCCTGACTATATGGGCTATGCATTCTACCCATCTTCATGGAAGCTCCGCGGACTGCCTGATCGGGAGGTGCAGTCCTTCTCGGTATCCTTTGTCTTTGGCATAGCCTCTGTCGACTTTAATGGTTGTCCCAACAGCATGAACTTTTCTATCCATCAAGGTCTCACAAATAAGAGCATGCTTGCAATCGTGCTTGAAGCTTGCCACCAAGATAACAACTTCCAGGAAAACAACGACAACGATGTCAGCATCTCCATCGGAGGTAAAAGCTCGGCAAAATCTCCTGCTGGTTTCTATGATGGCAAGAGTGGCATTTTCAACAACTTGCCCCTCCTTAGTCACAACATGATGCAAATGTCGGTGGAGTATGATTTGGCGGCCACACAGATCAACGTGACCTTGTCCCCCCTCGAGATGGTTAAACCGTTGAGGCCATTGCTATCCCTTTCCCTCAACCTCTCAACAGTGCTGGAGGATCCATCATATATTGGTTTCTCGGCTTCAACTCGTATAATCAGCTTGAGATATAGTGTGCTTGGCTGGAGCTTTGGTATGAACCGTCCTGCTCCAACCATAGACATTGCCAAGTTGCCACAGTTACCTCGGGTCGTTGACCCAAAACGTCAATCCAAACTGTTGAAGATCATACTGCCGATAGCCATGGCCACACTTGTCCTACTTGTGGGCACAACGGTCATTCTATTTGTGCGGGGGAGAATGAGGTACGCTGAACTATATGAAGATTGGGAGCATGAGTTTGGGCCACACCGCTTCTCCTACAAGGATCTTTTCCAGGCTACAGAAGGATTTCATAATAAGAATCTGCTTGGCCGTGGAGGATTCGGGAAGGTGTATAAAAGTGTGCTTCCAGTCTCTAAGCTGCAGGTTGCTGTGAAGAGGGTGTCCCATGAGTCAAAGCAAGGAATCAAGGAGTTCATCGCCGAGGTTGTCAGTATAGGCCGCCTCCGACACCGCAACCTTGTCCAGTTACTTGGTTATTGCAGGAGGAAAGGTGAACTCTTATTGGTGTATGAATATATGCCAAACGGTAGTCTTGAAAAGTATTTGTATGTTGAAGCAGACAAGACCACACTCGACTGGGCTCAGAGGCTTCAGATCATCAAAGGTGTTGCATCTGCCATATTCTACCTCCATGAGAAATGGGAGAAAGTTGTCATCCACCGAGACATCAAAGCAAGCAATGTTCTTCTTGACAATGAGATGAATGGACATCTAGGTGACTTTGGCCTTGCAAGATTGTATGACCGTGGCACCAACCTACAAACAACACGTGTGGCTGGTACCTTGGGATATATAGCCCCAGAGCTAGCACGCACCGGTAAAGCATCCCCTCTAACAGATGTGTACGCATTTGGCATTTTCATTCTTGAGGTAACCTGTGGGAAAAGGCCGATCAACAACTGTTCACAGGATGGTCCAAAGATGCTAGTCGACTGGGTTGTCGAGCATTGGCAGGGAGGATCACTGACAGACACACTGGACAGGAGGATACAAGGAGAGTATGATGCTGATGAGGTAAATCTCGTGTTACGGCTAGGACTCTTGTGTGCACATCCATTTTGCAGCACGAGGCCTAGTATGCGGCAGGTTATGCAATACCTTGACGGTGACATGCCGCTCCCCGAGCTTCCACCCATAAACTTAAGTTATAGCATGTTAGCCCTAACGCAGAACGAAGGTTTCGATCAATACACGTCATTGCCTTGCACAGTTAGCAGCAATGGCATGACGTTTAGCCTCTTCAGTGGAAGATGATCCACTTAGATGAGTGGGACTCATAGAGGTAGAACCAAACCAAGCTTGGGCCGTATCTTGTTCTTGTTTCGGGAGTAGTCTCCAAGCTGTGTAACGTGTTTCTCTGTTTTCTTTAAAATCAATGTGTTTGTACCAAATTGCTTTCTTCTGAGTGAACAAGTAGAGCTCCTCCCGGTTTCTCGAAAAAAGGGCCAAGCCAGACAAGCATTTTATATTTAATAGGGCTTGGTAACCTGATTTACTGAAGTCCGCTGCACTTTTTAGTTTATACTCCCGCCGTTCCTAAATATAAGTCTTTTTAGAGGTTCCACTAGAGGACTACATATGAATGTATATATACATACTTTAGAGTGTAGGTTCACTCATTTTGTTCCGTATGTAGTTCCCTTTTGGAATCTCTAAAAAGACTTGTATTTAGGAACGGAGGGAGTACTACACAAATATGTACTTCTATGCAATATAACTCTTGTATCATTAATAAGATGTGTGAACTCTTGTATCATTAGTTTGATGTGTGAAACCTCTGTTTCTTCTCAGTTTTATATAGAGTACTTTTTATCAAAGAGTTCTGTTGTTAGATCTTGCAGACAGCTGTAAAGTTTCTTTTTATATGAAATTCAGGGATCACCAGATATTAACTTTGTAATGTTGGGGTTCAGATTACTGCACAACATTCAGTGCGTTGCCTCGGCACTACAAGGTACATTAAACGCTAGTGGAGCTAATTGTACAGTAACAAAGGATAGCCTATTAGCCCAACCATTAAGGGAGTATTACACCTGGATTCTTTGATCCTCTAGCCGGGGAATGCATGCCTTATCCACTGTACTTGATTGCACTCAAAAGGCAGAACAGATGAGCATTCAGATGCTGCCACCAAAGAGAATTGATCAGCTTTTGCTTTAACAAAAGAAAAATAAGCAGTTTAATTTATAATACTAGAGCAGTTACCTGGGTCATAAGGTGAACTTAATTCATTCCATTCTTCCAAGAGANNNNNNNNNNNNNNNNNNNNNNNNNNNNNNNNNNNNNNNNNNNNNNNNNNNNNNNNNNNNNNNNNNNNNNNNNNNNNNNNNNNNNNNNNNNNNNNNNNNNNNNNNNNNNNNNNNNNNNNNNNNNNNNNNNNNNNNNNNNNNNNNNNNNNNNNNNNNNNNNNNNNNNNNNNNNNNNNNNNNNNNNNNNNNNNNNNNNNNNNNNNNNNNNNNNNNNNNNNNNNNNNNNNNNNNNNNNNNNNNNNNNNNNNNNNNNNNNNNNNNNNNNNNNNNNNNNNNNNNNNNNNNNNNNNNNNNNNNNNNNNNNNNNNNNNNNNNNNNNNNNNNNNNNNNNNNNNNNNNNNNNNNNNNNNNNNNNNNNNNNNNNNNNNNNNNNNNNNNNNNNNNNNNNNNNNNNNNNNNNNNNNNNNNNNNNNNNNNNNNNNNNNNNNNNNNNNNNNNNNNNNNNNNNNNNNNNNNNNNNNNNNNNNNNNNNNNNNNNNNNNNNNNNNNNNNNNNNNNNNNNNNNNNNNNNNNNNNNNNNNNNNNNNNNNNNNNNNNNNNNNNNNNNNNNNNNNNNNNNNNNNNNNNNNNNNNNNNNNNNNNNNNNNNNNNNNNNNNNNNNNNNNNNNNNNNNNNNNNNNNNNNNNNNNNNNNNNNNNNNNNNNNNNNNNNNNNNNNNNNNNNNNNNNNNNNNNNNNNNNNNNNNNNNNNNNNNNNNNNNNNNNNNNNNNNNNNNNNNNNNNNNNNNNNNNNNNNNNNNNNNNNNNNNNNNNNNNNNNNNNNNNNNNNNNNNNNNNNNNNNNNNNNNNNNNNNNNNNNNNNNNNNNNNNNNNNNNNNNNNNNNNNNNNNNNNNNNNNNNNNNNNNNNNNNNNNNNNNNNNNNNNNNNNNNNNNNNNNNNNNNNNNNNNNNNNNNNNNNNNNNNNNNNNNNNNNNNNNNNNNNNNNNNNNNNNNNNNNNNNNNNNNNNNNNNNNNNNNNNNNNNNNNNNNNNNNNNNNNNNNNNNNNNNNNNNNNNNNNNNNNNNNNNNNNNNNNNNNNNNNNNNNNNNNNNNNNNNNNNNNNNNNNNNNNNNNNNNNNNNNNNNNNNNNNNNNNNNNNNNNNNNNNNNNNNNNNNNNNNNNNNNNNNNNNNNNNNNNNNNNNNNNNNNNNNNNNNNNNNNNNNNNNNNNNNNNNNNNNNNNNNNNNNNNNNNNNNNNNNNNNNNNNNNNNNNNNNNNNNNNNNNNNNNNNNNNNNNNNNNNNNNNNNNNNNNNNNNNNNNNNNNNNNNNNNNNNNNNNNNNNNNNNNNNNNNNNNNNNNNNNNNNNNNNNNNNNNNNNNNNNNNNNNNNNNNNNNNNNNNNNNNNNNNNNNNNNNNNNNNNNNNNNNNNNNNNNNNNNNNNNNNNNNNNNNNNNNNNNNNNNNNNNNNNNNNNNNNNNNNNNNNNNNNNNNNNNNNNNNNNNNNNNNNNNNNNNNNNNNNNNNNNNNNNNNNNNNNNNNNNNNNNNNNNNNNNNNNNNNNNNNNNNNNNNNNNNNNNNNNNNNNNNNNNNNNNNNNNNNNNNNNNNNNNNNNNNNNNNNNNNNNNNNNNNNNNNNNNNNNNNNNNNNNNNNNNNNNNNTTGTGTTGTGTTGTGTTCAGTTTACATCAGACGGCAATGACTGGCCTGCTGGCTAGTTAGCCTTTCAATTTTTAATGCCCCATTCGCGCCCTGCTAGTCTAGCCAAAGGAGGCACGGCAGCTGTGTCGTGCCTCACAGCACGTCAGAGGAGCTGAATCCAGGTTTATCCAGAATAGTGCTTTAGACCTACCTCTGTGTGACGAATAAATAATATTACCTCCGTCTTAAATTATTTGTCTTAGATTTATCTAGGTACGGATGTATCTAACACTACAGCATGTCTAGATACATTTCTATCTAAACAATTCTAAGACAAGTAATTCGGGACGGAGGGATACCTGTCAAGAGGCAAGTTTGATGTATCTGTTTCAGTCTGGCAAACTTCTCTCTCCATTTTTATAAGAGACAAGAGACAAGATTGCATTGTCTCAAACTTGTCTCTCCTTTTCTATAAGCAGACTCAAGGAATTGCCAGCTGAGACCAAAAGCCTTGCTAAAAAAACAATGAGGTAACATTAAAAAAATGCTAGGATTGGCCAAGACAACAGTCACAAACAGAATAAAGCAAAGCTTACACAACGTTCTATATACAGAAAAAAATGCAGGTGTTTCTTGGAGCCACTGACTCCAATCATTGCAGAAATAGTAAAGAGAAAGTGGAAAGCGAGATTTCAGGAGGGAAAACCCGAAAACAGAACTGAAAAATGCTCAAACAAACTGAGACAGGGGATAGCAGATTTTACTGCTCCACACGGCGACCAGTCTTCAGATTAGCACCTCACATAAAGTTCTTAAATTTTAATGTAATCAATACATATGACAAACAATATTTTTCGCAACATGAAGAGAAACTAAAAATCTAACCACAGGGAGAGCCCTGCTGCTAAATCAAACAAAGCTAGTGACACCTGAAGCGGAAGCAAGGACCAAGGAAGAAACCGTAAACTGAGAATAGGAAACAACATATGAAGTAAAGAACATCTGCACACAACCGCGTCTGACTTTCTTTAAGGATGAACATTATACTCCCATTTTCTTCTGAGCTTGTTCACCTTCACCACTGTTATGATATAAATCATATCAAAGAACCTATCAATCGTCAGAAAATACGCAACCCTCCAAACCCTTATGAAGAACAGTACATTCCAGACGATCAAAAGCCCAAAAGCGAATCCCACTTCCACGGTGATGTATGTCATCGCAGGCATTGCAGTATCCGCACCACGATGCTGCTCATTTCTTGTTTCCACAAATGGAGCCTCTTCGGTGCAGGAGTCATTCCAAAGATGGTAGAGTGCAGAATTGCCCACAAAATCCTCATTCGCAAATGTGGAAAATTGCCCCCCTGTTGGTATATCTCCAGCCAAGTTGTTGTAAGAAACATCAAACTTGGGCAGAAATGTCAACTTTGTTAGAGATGCTGGTATGCTCCCACTGAGATCATTGTGGGACAAATTTAGCGCTTCCAGGCTCGACATGTTTGACAGCTCGTCGGGAATGCCCCCTGAGAAGTTGTTCCAGCTCAAGTCCAGTACATGAAGATTCACAAGATGGCCAAGGACTGGCAGGACTGGCCCTACAAGCAAGTTATTGGAGAGGATCAGTGATGGCGGGAAGCTGCTGACATGATTGACTGCAAACCTTTGTCAGCTGAATTCTTCTTGAATAATGGGAAGCCCTCTATTGATGCATGCTCATTTGAGTAATTACTTGAAAGTAAACTCTTTAGCTGTGTAAAGCTCTCAGGAAGCTCCCCACTAAACGAGTTGTTTGACAGGTCGACATAGAAGAGATTATTCAGATTGCCCAACCAGAGCGGGATCGTTCCGTTCAACTTGTTCCATGAAAGGTCCAGCACTCTGAGGCTCTCCAAGTTCTGCAGCCAAGGTGGAATCCTGCCAGAGAGCGCACAGTGTGCCAAGACAAGCACCTGCAGGCTCTTGAACCCACTAATGCCATCCATCGGCAGGGTCTCAACACCACGTAAATTCTTAGTGAGCACCAAGCTAGTCAGTTTGGGCAGGTGCTGCAAGACTCGTAATGCCAATGACAAGTTGGTGAAGCCATTGTGAACAAGCGAGAGGTGCGGCAGGGATCGTAAATTCTTAAAACTCTCTGGTATCTCCCCCTCAAGCTTGTTCCTTCCAAAGTTCAGCGTCTTCAACTCGGTACACCACATGAGACTGGGAGGTATAGCACCACTCAGCATGTTGCTCCCTGCATCCAGAACGTTTAGCCTTGGCAGTAAGTTGAAGTCTAGGGCAATATCACCTGAAAGCGAGTTGTTCCTTAGGTTGATAATCCTCAGCATTGGGCAGCTAGACAGGGAAGCAGGCAATGTGCCACTGAATGAGTTTGAGGCCAAGTTTAGGATGTTAGGTTGATCTCTCACCGCGTGGGCCCTGTTAGGAATAAGCAACTTGTATTCCCATGAGGCCATAGGCCGATATATATACATGTACAGGTTATGGACTATATGCAGGAAAACCCCTTATATATTGGGATAAATACAAAAGGGTACATGAGTTGTATTATAACTCTAACACCCCCCCTCAAACTCATGGTGGATGAACAACACTGAGTTTGGAGAGATAAAAACCATGTTGTGCTCTAGTCTGAGCCTTCGTCAGGAAATCCGCCAACTGTAACTCGGAGGGCACATACTGAAGAGCAACAACCTGATCCTGCACAGCAGCGCGCACATAGAAAGCATCAACACCAATATGCTTGGTGAGCTCATGCTTCACAGGATCGCGCGCAATGCTAATAGCTCCTGTACTATCAGATAAGAGCAGAGTCGGTGTAGTGACAGAAACACCAAAATCCTGAAGTAACCACCGTAACCAAGTCACCTCTGCCGTCAAAAGAGCCATCGCTCGCAACTCAGCCTCTGCACTCGAACGGGAAACTGCAATCTGTTTCTTCGTCTTCCAGGCAATGAGAGAACCACCAAGAAAAACACAGTAAGCAGAAAGTGAACGACGATCGGAAGGATCACTAGCCCACGTAGCATCCGAATAGGCCTGAAGCTGTAAAGAACTGGAGCGAGGAAAGAATAAACGGTGAGAGATTGTGCCCCGAAGATATCGGAGAACACGGAGGAGATGACTATAGTGAACCGATGTGGGAGTACAGACAAACTGACTCAGAATATGAACCGGATAAGAAATATCCGGACGAGTGACAGCTAGATAAACAAGACTGCCAACAAGATGACGATAGCGCGTCGGGTCAGGCAGGGGATCACCATCAGTAGCAGAGAGGTGAACATTGAGCTCCATAGGAGTCTCAATAATGCGCTCATCAGTAAGAGCAGCACGAGCAAGAAGATCCTGGATATACTTTTCCTGGGATATAAAAAAGCCATCAGAGGTAGAAGAGACTTCAATCCCAAGAAAGTAGCGAAGAGGTCCAAGATCAGACATAAGGAACTGCTCACTAAGACGAGCCTTGACAAAGGCAATATACTCAGGGTCATCCCCAGTGATGACCATGTCATCAACATAAAGAAGAAAAAGAGTCCGACCACGAGGAGAAAGGTGAATAAACAATGCTGGATCATGAACACTGGGTGAAAAACCAGCGGCAGTCACCACAGAGGCAAAACGCTCAAACCAGGCTCGGGGGGCTTGCTTAAGGCCATAGAGAGAGCGACGAAGACGGCATACCATGCCATCAGGAACAGAATACCCAGGTGGAGGCTGCATGTACACCTCCTCACGCAGCTCACCATTAAGAAAAGCATTCTTAACATCAAGATGAGAGATAGACCAGTGGCGTGTAGAGGCCACGGCAAGAAGTGTACGAACAGTGGTCATATGAGCCACAGGAGCAAAAGTCTCGTCATAATCACGACCATGCTCCTGCTGAAAACCACGAGCCACAAGACGAGCTTTGTGACGCTCAAGAGAACCATCGGAGCGAGTCTTTACCTTGTAGACCCACTTACAAGTGATGGGACGGACTCCAGGAGGAAGGGAAACAAGATCCCACGTACATGTGCGTTCAAGAGCAGCAATCTCCTCAGCCATCGCAAACTGCCATTCAGGATGAACAACAGCCTGATGATAAGTAGTCGGCTCAAGAACAGCAGCTCCAGCAGTGGAAAATCCTAAGCGATCAACAGGCGGACGAGGACGAGAACGCAAGCCATAAGTAGGCTGAGACGAGGATGACGGCACATCCAGAGAGGCATCCACAGAACGTGAACGACGAGTGTAACACTGAGGAAAAGATGGAACAATGGAAGGAGGAATCGCTAAAGTAGAATTGGAGAGTGGCGACGAAGAAGTCACCGGAGATGAAGGTGTAGAATCCGGTGACATGCTAGACGAGGAGACCGTGGAAGATGGTGGCGACAAATCGACTGGAGGTGGAGAAGCAGAGGGAGCGGAATGAGTAGGCAAAGGCTCGACGAGTGTGATGGGTGTGTCAGGAAAAGTGAGAAAAGAGATATCCTCCACTGAAAAAGTCGAGGAAGATGGGCGTGGGTAGAAAGGACGAGACTCATCAAAAGTCACATCCCGAGAGATACGTATCCGACGACCGATAGGATCCCAACAACGATAGCCCTTATGCTCATCACTATAGCCTAAGAAGACACACTCAACAGACTGAGCGGTCAGTTTGGTGCGTTCGCGGGGGGCAAGAAGAACATAGCAAACACAACCAAACAAGCGAAGCGTCGAATAATCGGGAGACTGATCAAAAAGACGCTCGAAGGGAACACCACCCTGTAGAGCAGCGGAAGGCTGGAAATTGATGAGATAGGTGGAGGTGGAGACGGCCTCAGCCCAAAAATGAGGCGGGAGAGAGGCAGCAATCATCAATGCACGAGCCGTCTCAAGAAGATGACGATGCTTGCGCTCAGCCACGCCATTCTGAGCATGAGCACCAGGACAAGAGAATTGAGAGAGAGTCCCTTGCTCAGCAAGAACACCACGCAACATCTTAGAGATATACTCGCCAGCGGAGTCAGCACGAAACACACGAATGGGAGAAGAGAACTGAGTATGAACCATGGCAGCAAAACGCTTATAAATGGACAACACCTCACTACGAGAAGTCATGAAATAAAGCCATGTGTAACGAGAGAAGTCATCGATGAAAATAATATAGTATTTATGACCCCCTTTCGAAGCGAAGGGAGCCGGACCCCATACATCAGAATGGACTAAATCAAAAGGACGCTTAGACACTGACTCACTATGTGGATATGGTAACTGAATCTGCTTGCCAAGACGACAACCCTGACACTCTAAGGAGGCATCTCCTGAGACAGACCCCAGAAGACCTCGACGAACTAACGACGACAAACGAGAACCACACAGATGACCAAGTCGATGATGCCACTGCTGGAAAGAACCAGTAGCCGAGGCGACCAAAGCGGAAGAACTGGCGATAGAATGGGCAGCGGAAGGAACATGAAGCCAGTCCAACTCCCAAAGACCCTCAGAATCACAGCGGCGAGGACCAGCCCCAACCAGAGTGTGCGTGCGACGGTCCTGGACAGAACAAGAGTCAAGATCAAGGATGACACGACAACCAGAATCAGCAAGTTGACCAGCGGAAAACAAATTCATGGTAAGTCGAGGAACATGAGCAACATTGGGAACAGAATAAGGAGTGGTAAGAGTGCCTCTACTAACGACAGGAAGGGGAGTACCATCAGCAGTGAGGACATGAACAGGAGAATCAAGCGAACGAAGAGAGGACAGAGTGGAAGAATTAGAAGTCATATGAAAGGAAGCTCCAGAGTCCAGAACCCATGGGGATGTACCTGACTGTGTAGAAGGTGGTTGCGCAGTGCGGGAAGCCTCAGTCACAGAACCAGCAGTACCCGTTGAGGAAGAACCTGAAGCAGCGAGCAGACGCTTAAGTCTCAGAATATCCTGCTCAGTGAAAGCGATGGCTGAAGCTGTCGAGGTAGGTGACGAAGTCGCTGTAGATGATGACCGCGCCTTGCGCAAGTGTTTCTTCTTCGTGTAGCAGTGGGGCTCAATGTGACCATCATTGTTGCAGTAGTTACAATGTGGACGGGGGCGACCTGAGCCGCCAGAAGGAGTGGGCAGGAGCGGCGGAGCAGTCGAGCGAGAAGGGGTCGGTGCAGCAGGTGGCGTAGAAAAAGTCCGAGCAGCGAGCACCGAGGGAACCTCCAGCAAACCAGCACCACGTAAGCGAGTCTCCTCAGCACGAATCTCAGAAAGCGCCTCCATGAGAGAAATACGGCCACGAGCAAACAACTGAGCACGCCGGGGCTCAAACTCCTTACGGAGCCGAGACAGGAACTCGTAGACGCGATGAAACTCCAAGTCGGCCTGTACAGCCTGGCAACAGGGGCAAGTACGACAACCAGCACCGCGGAGAGAATCAAGCTGGCGCCAGATAGCAGAACTCTGTGCATAGAAGTCATCAACAGTAGAGTCACCCTGATGAAGAGCATGCTCCTGACGGACCACAGAGAGGTATAAGGCATCACCAGAGGGCTCATAGCGCTGACGAAGGCGGGTCCACATCTCAAAGACAGTAGGAAGGCCCAGAAACTCAGAAGCAAACTGAGGCAGAACACTAGCAGTGAGAACAGCGGCAGCACGAGCATCATCATCAAGCCACTGGGTGTAAACGGACAGAGCATCACGATACACCTGAAGAGCCTCCTCATAAGCCAAGACCTTCTCATCATAAGCACTCACAGCGGCCTCATCAGCAAGCTGAGTCGTATCCTTTGCGGCCTGAGAAGCATCCGCAGGAAGAGCCGGTGGGATCGGCGGGGTGGGAGCCACGGGAGGAACCGGACATGGCGGACAAGAGACCTCGCCGGAAAGAAAACCCCATAGGCGGATGCCACGCATGTGAATGCGCATGAAGCCAATGAACTCGGTGTAGTTAGTGCCATCAAAGATCACTGGACAACGAGGAACAGCAACGTAGCCGGATGCAGCAGACATTTTTTTTTCTTTTTTTTTTAGTCAACGAAACGCGTCAGACAGCAGGACTCGATTTGGCGATGGGGGAGCCGCCTCGATCTGGGAGAGCCTGAGATGCGATCTGGTGCGGATGGAGTCGAGGGCCAGGGGCGGCGCGATCTGAGGAGCCGCGTCCACTGGTGGAAACCGCCTGGGCTGATGGGACGCGGGCGCCTCTGCTGATGGAGATGGGACGCGGGCGCCTCTGCTGATGGAAAGCAGCGTCCGCGGGCTCAAGGGAACCGCCTCTGCTGGTGGAAACCGCCTCTGCCGATGCCGATGGGAACGCGGCGCGGGAGGGCCTCGATCTGACGAGGAGCTGGCGACTGGTGGGANNNNNNNNNNNNNNNNNNNNNNNNNNNNNNNNNNNNNNNNNNNNNNNNNNNNNNNNNNNNNNNNNNNNNNNNNNNNNNNNNNNNNNNNNNNNNNNNNNNNGGACCTGGATGCCCATATTGGATCCTACATATTCTACGAAGATCTTATCGTTTGAACCTCAGTGCCAAGGATTCATATAATCCCGTATGTCATTCCCTTTGTCCTTCGGTATGTTACTTGCCTGAGATTCGATCGTCAGTATCCGCATACCTATTTCAATCTCGTTTACCCGCAAGTCTCTTTACTCGTTCCGTAATACCATATCCCGCAACTTACACTAAGTCACATTGCTTGCAAGGCTTGTGTGTGATGTTGTATTACCGAGTGGGCCCCGAGATACCTCTCCGTCATACGGAGTGACAAATCGCAGTCTTGATCCATACTAACTCAACGAACACCTTCGGAGATACCTGTAGAGCATCTTTATAGTCACCCAGTTACGTTGCGACGTTTGATACAGACAAAGCATTCCTCCGGTGTCAGTGAGTTATATGATCTCATGGTCATAGGAACAAATACTTGACACGCAGAAAACAGTAGCAAAAAATGACACGATCAACATGCTACGTCTATTAGTTTGGGTCTAGTCCATCACATGATTCTCGTAATGATGTGATCCCGTTATCAAGTGACAACACTTCCCTATGGTCAGGAAACCTTGACCATCTTTGATCAACGAGCTAGTCAACTAGAGGCTTACTAGGGATAGTGTTTTGTCTATGTATCCACACATGGACTGTGTTTCCAATCAATACAATTATAGCATGGATAATAAACGATTATCATGAACAAAGAAATATAATAATAACTAATTTATTATTGCCTCTAGGGAATATTTCCAACATTTTTTCGTCGTTTCGCCGCCGCCACGAGGCGGAACTTGAGTAGATCCAATCTAGAGCTCCGGCAGGATGATCCTCCGGGGAAACTTCCCTCTCGGAGGGGGGAATCGTCGCCATCGTCATCACCAACACTCCTCTCGTCGGAGGGGAGGCATCTTCATCAACATCTTCATCAGGACCATCTCCTCTCCAATCCCTAGTTCATCTCTTGTAACCAATCTTCGTCTCGCGACTCCGATTGGTACTTGTAAGGTTGCTAGTAGCATTGATTACTCTTTGTAGTTGATGCTTGATGGATTACTTGGTGGAAGAGTTTATGTTCAGATCCTTGATGCTATTCATTACACCTCTGGTCATGATTATGATTATGTCTTGTGAGTTGTTACTTTTGTTCCTGAGGACATGGGATAAGTCATGCTGATAATAGTCATGTGAATTTGATATCCGTTCGGTATTTTGATATGATGTATGTTGTTTTTCCTCTAGTGGTGTTATGTGAATGCCGACTACATAACACTTCACCACATTTGGGCCTAGAGGAAGGCATTGGGAAGTAGTAAGTAGATGATGGGTTGCTGGAGTGACAGAAGCTTAAACCCCAGTCTATGCGTTGCTTCGTGAGGGGCTGATTTGGATCCACTAGTTTAATGCTATGGTTAGACTTTGTCTTAATTCTTCTTTTGTAGTTGCGGATGCTTGCGAGAGAGGTTAATCATAAGTGGGATGCTTGTCCAAGTAAGGGCAGTACCCAAGCGCCGGTCCACCCACATATCAAACTATCAAAGTAACGAACGCGAATCATATGAACATGATGAAACTAGCATGACAGAAATTCCCGTGTGTCCTCGGGAGCGTTTTTCCTCCTATAAGACTTTGTTCAGGCTTGTCCCTTGCTACAAAAGGGATTGGGCCACTTGCTGCACCGTTGCTATTATTTGTTACTTGTTACTCTTTGCTTGCTATGTTTCACCTCTCTACACAATCACTTGTTACCGCTACTTTCAGTGCTTGCAGTTATTACCTTGCTGAAATCCGTTTATCACAGCCTTCTGCTCCTCGTTGGGTTCGACACTCTTACTTATCGAAAGGACTACGATTGATCCCCTATACTTGTGGGTCATCAAGACACTTTTCTGGCACCGTTGCCGGGGAGTGAAGCGCCTTTGGTAAGTGGAAATTGGTAAGGAAACATTTATATACTGTGCTGAAATTTATTGTCACTTGTCACTATGGAAACTGTTCCTTTGAGGAATTTGTTCGGGGTATCTTCACCACGAACGGAAGCATGAGGAGTTGCTCCTCAACCTGAGGTACCTACTGGAAATATCTTTTATGAAATTCCTTCGGGTATGCTTGAGAAATTGTTCGCTAATCCTTTCACACGGGATGGATCTTCACATGCAGACTTGCATCTGATCTTTGTAGATGAAGTTTGTAGTTTATTTAAGCTTGCAGGTTTGCCCGAGGATGAGGTAAAGAATAAAGTCTTTTCTTTATCTTTGAAGGATAAGGCGTTGACATGGTATAGGCTATGTGATGATACTGGATCATGGGGCTACAATCGGTTGAAATTGGAATTTCATCAAAAGTTCTATCCTATGCATTTAGTACATCGTGATCGGAACTTTATTGATAACTTTTGGCCTCGTGACAGGGAAAGCATAGCTCAAGCTTTGGGGAGGCTTAAATCAATGCTATATTCATGCCCCAATCATGAGCTCTCGAGAGAAATCATCACTCAAAACTTTTATGCTCGGCTTTCTCATGAAGATCGTACCATGCTTGACACTTCTTGTGTCGATTCTTTTATGAAGAAGGATATTGATCACAAGTGGAATTTATTGGAGAGAATCAAACGCAACTCTGAAGATTAGGAGCTGGAGGAAGGTAAGGAGTCAGGTATGAATTTCCAGTTTGATTGCGTTAAATCTTTTGTTGAGACAAACACTTCTAGAGATTTTAGCGCTAAGTATGGACTTGACTCTGAGATAGTAGCTTCTCTATGTGAATCTTTTGCTGCTCATGTTGATCTTCCCAAAGAGAAGTGGTTTAAATATCATCCTCCTGTAGAAAGCAACATAGCCAAAACCAATCTAGTTGAGGAGAAAATCATAGCTTTTAGTGATCCTGTTGTTCCTTGTGCTTACACTGAGAAACCACCATACCCTGCTAGGATAAAGGATTATTCTAAAGCTCCCCCAACTATGATACGTAGGGGTTACAGTAGACCACTTGCACCCCCTGAAGAGATTAGAGCTGAACCTAGTGTTTCTATTATCAAAGATCTCTTAGCCAAAGACATAGATGGGCATGTTATCAAATTCTGTGAGGACTCCGCTAGAATTGCTAAACCTCACGCGAAAGACAAACACGGACCTGTAGTTGGCCTACCCGTTGTTTCTGTTAAGATAGGAGATCACTGTTACCATGGTTTATGTGATATGGGAGCTAGTGTTAGTGCAATACCCCATTCTCTATATGATGAAATCAAAGATGAGATTGCACCTGCTGAGTTAGAACCCATTGATGTCACTATTAAGCTAGCTAATAGAGACACTATCTGCCCTCTGGTAATTGTGAGAGACATAGAAGTCCTGTGTGGTAAGACGAAGTATCCTACTGATTTCCTCGTCCTTGGTACTGCACAAGATAACTTTTGTCCCATCATATTCGGTAGACCCTTTCTCAACACTGTCAATGCTCACATTGATTGCATTAAGCAGACCATCACAGTTAGTTTCGAGGGTGTGTCTCATGAATTTAACTTCTCCAAGTTTGGAAGACAACCCTGTCGTGGGTATAAGCCTGAAAGTAGATGTGTAGGGTACGAAAAGGATGGGCAGTGTCCTAGCTACGGCGAGGTTGTATGAGTTCAGGCCCCTCTGCGGTGGAGGTAATAGCCCTACGTCTCAGTGCTCTGGGAGCTTGTTGTCGAGTGGAATATGGAATACAATGATTTGCTAACCCCTGCACCAGTGGGGGAGGGTGGCTTATATAGAGTGCGCTGCCCTCCACAACGGTTCCGGTACGGGGGTGGAGTAGTGGCGATTGAATGCCTACGTTACAGGTAACGTACGTCCTAAATGCTAATAAATGCACCTAGAAACGTACGACCGTTTCCCTCCAGGGGGGTTACGATGTACCGAGTGGAGTCCAGTCGGTTAGTTTGATATTCTCCGAATGCTAGTCCCCGACTGGATNNNNNNNNNNNNNNNNNNNNNNNNNNNNNNNNNNNNNNNNNNNNNNNNNNNNNNNNNNNNNNNNNNNNNNNNNNNNNNNNNNNNNNNNNNNNNNNNNNNNGTACAAAAATATATGTATTTCACAAATATAATAAAAACTATGGTCTAACTTGTAATTTTTTCATGTAACTCACTTTGAAAAATCTTATATAAACATAATAAAAATGATAAATTAATATACATACTACCGCATGATAGTATATGGAACATGTGGGTAACTACCCCTGGGTGGTAGGATGTATTTTTTCTATATATATATTAGCGAATCTGCTCTTTTAGCCCTCCGGATCGAGCAAATCTTCTACGAGTAGGGTGATGTCTACTACGCAACCTTCTCCTTGTAGACGTTGTTGGGCCTCCAAGTGCAGAGGTTTGTAGGACAGTAGCAATTTTCCCTCAAGTGGGTGACCTAAGGTTTATCAATCCGCGGGAGGCGTAAGATGAAGATGGTCTCTCTCAAGAAACCCTGCAACCAAATAACAAAGAGTCTCTTGTGTCCCCAACACACCCAATGCAATGGTAAGTTGTATAGGTGCACTAGTTTGGCAAAGAGATGGTGAAACAAGTGCAATATGGATGGTAGATATAGGTTTTTGTAATCTGAAATTACAAAAACAGCAAGGTAACAAATGGTAAAAGTGAGCACGAACGGTATTGCAATGCGTGGAAACAAGGCCTAGGGTTCATACTTTCACTAGTGAAGTTCTCTCAACAATGATAACATAATTGGATCATATAACTAGCCCTCAACAAGCAACAAAGAGTCACTCCAAAGTCACTAATAGCGGAGAACAAACGAAGATATTATTGTCGGGTACGAAACCACCACAAAGTTATTCTTTCTGATCAATCTATTCAAGAGTCCGTAGTAAAATAACACGAAGCTATTCTTTCCGTTCGATCCATCATAGAGTTCGTACTAGAATAACACCTTAAGATACATATCAACCAAGACCCTAATGTCANNNNNNNNNNNNNNNNNNNNNNNNNNNNNNNNNNNNNNNNNNNNNNNNNNNNNNNNNNNNNNNNNNNNNNNNNNNNNNNNNNNNNNNNNNNNNNNNNNNNTACATCACATTGACGAATGGGAGCTAGCCACATATCTCTCCGTGTTATAGTTGTTGCATGATGAATATTATCCAAACAAATCACCGACCCATTGCCTACGAGTTTGTCCTACTGTTGTTACTTCTCTTGCTCTGCTGCTGCTGCTACTACTCTTGCTACTGCTGTTACTTGTTTTGCACTGCTGCTACTGTTGCTACTACTGTCGCTTGCTACTGTTGCTACTTGCTACTGCAGTCACTACTGTTGTTCCTTGCCACTGCTATTGCTCGTTACACTGCTACTACCTGCTACATTGTTGGTTCGCCAGACCGTTGACGGGAATTGACAACTTCCGTCAACGCGGCAATGGAAGCGCCATTGATACAATCGTTAGGAATAGTCTGTTGTCAACAGATCGTTTCTGACACCGTTGTTATCATATTACTTTGTTGTTACTACTGTGCTTGCAGATACTAATCTTTCAGGTGTGGTTGAATCTGACAAATACAGCTGCAAATACTCGAGAGTATCATCTCACCTCCTTTAGGCGATCTACAAATTTGGGTTGAATACTCTACCCTTGAAAATTGCTGCGAACCCACGCGCTGGTGGGCCATCAACAACATTCTTCCAGTCTCATTGCCGGGGAGTGATATCAGCATTCTTCTGGTGCCGTTGCAGGAGAAGGTTTGTTGTTATAAGCATTCATCTAGCTAACGCCAGAGATTGCAGGATCAGCCCTTTTCTGGAGCCATTGCTAGGGAAGCACAGCTGACGTCGCTCATTTTTTATTAAATAGGTCATTTTGGAGCTAACTAAGCTAATTATGTCCTTTTGTAGGATAATTAGCCAATTTAGTCTTTCTTCGATGAGTCTAAGCTACGTAGAAGAAGAGGAAGAGAAGAAGAAGTAAAAGAAGGAGGAGGAGGAGGAAGGCAGCCAGGAGGGCAGTGTGGAGAGCGGCGAGTATGTCTCCGATAGTGGGGAGACGGAGGAGGAGTCTGGTGAAGNCTTCTCCTTCTTTGTGACAGCCCGATGCCGACGTTCCAGAAGATTCCCCTTCTATTCCGTTTTCGTCGTGTGTCTATTTTCTTTTGTCGCATCATCATCGCATCATGCGCATCATCTGCATTGCATCGGCATCTCCGTTGCTGCTAGTTTTCAAACTTGCATCCGTTGTTAGTTGCCGGTTCTCGTCGTTGTCCGTTCTGAGCCCGACGACACACGCACGCGTCGGCGGCATCATCAAATCCCTGTTTTTAAAAGTGTGCGTAAAATTTTCTTTGGTCGGGGTGAAACTTGGTATGCGGTCATAATTAGTTATAGCTAGGCCGCCTGTCAAGTTTCGTCGGAATCGGAGTCCGTCTAGTACCCGAANNNNNNNNNNNNNNNNNNNNNNNNNNNNNNNNNNNNNNNNNNNNNNNNNNNNNNNNNNNNNNNNNNNNNNNNNNNNNNNNNNNNNNNNNNNNNNNNNNNNGGTCGAGGACCTGTTACCGACTGGACGATGGGGACTCCTTAGTTCAGTCGGAACTGACTAAGGGCCTTGTTCCTTATGAGGGGTAGTCCTTGGGTAGGACCTACAGGGCAGGCCTATGACCCTACCCTAGGACTATAACCCCATCATTAGTCCCCGAATGGATTGGGGTTGGAACGACGAAGCGATGCTTGAAGTTTGGATCCGACTAGAATGGATGCGACTTCGGCGTTGCTTGCCTCGATCCATTTTATCTTTTCTGACCAACAATCCGAGTGGAAATCTTTGTGGAACAAACTGTCGGAAACCGAGTGCTTCCAGGGTATCTCTTGACGTGACCAGTCAACTGACAGCGGCGGATTTTCCGGGATCCTCAAATTTCGGTTACCGCGCGCTCAGCGGGGATGACGCCATCGCGCTCGAGTAGCGCCTGACACCTCGATTCTCACGCCTTCATCTTCTCCACTGATATCGCCGCGGTTGGTCGAGGGATAAGGCTTTGGGGCCACCTGCCAGTGACGCAGTCGGAACCTTACTTAAACCTCAGCGGCGAGGGTTTTCTCGTTACGCTCGCCGAATCTCTTGCCTTTGCTTGCTCCGCTCCTCTCGCCTTCCTCTGCACACCCAAGCTTCCTCCTTTTTCTTCTCCTTCGCGGACCCGCAGCTTCCGCCATGACCAAGGGACAGACCAGCAAGCTGGAGGCGAAGAAGAAGAGGGGGAAGGCGGCGGCTCCTGCGCGGAGGCAGCGAACGCTACCGGCGGGGTGGATCCAGGGAGACTTCCTCCCCTCCACGGTGACAGAGGAGGACTTGCTGAAGCTGGTGGAGCACGGGATGATCGCGCACAAGTCCTGGAGGTTGCCGGAGGAGGGCGAGACCGAGCCGGCGCCCCGGGAGGGGGAGCGCGTCCTGCTGCTAAGCCACGTGCATCGAGGTTTCTCTCTGCCCCCTCACCCTTTCTTCAAAGGCATCATGAACCACTTTGGGGCGCAGCTCCACCACTTTCCCCCGAATGCCATCGCCCATCTCTCTGCTTTCATAGTCCTGTGCGAGTGCTTCATCGGCTGTCCTCCCCATTGGGGGCTGTTCAAACATATTTTCTCTGCTAGATCCCAAACTATCAAACGACTTCACCAGTTGGATGATAAGACACACCTTCTCCAGCTCTGCGGAGGCTTAGGTTTCCAGAAGAAGAATAGGAGTAGTTATCCTGCCCTTCAGCTGAGTGAGTCGGTTAGGAACTGGCAGTCGACGTGGTTCTACTACCAGGGTGTTGCCTACCCGAATGCCACGACAGGGTTGCCTCCCTTTAGCTTAGATCGTCCCGCTCCGCCCAAGCAGCTTGCGCTCACAAAGGCGGAGAAGGTCGACATCCAGCCTCTGGTCGACACACTCGTAGATGTCGTCAGAAGGGGAGTCACCGGCATAGACTTGCTGGAGATTTTCCTCGGTCGGCGCATACAACCACTGCAGGCTCGCGACCACGCCATGTGGCACTACACGGGGCCCGAAGACTCCACTCGGACCAACGTCTTGGGCGTGACCGAGGAGAAGGTGGCGTCGTGGGTGCTCTAGATCACAGGCGCCTGTGAGAACCCCAGAGGGTCTCGGCGAGTGAGGGCTTTCAGCGCGGACAATCCTCCTCCGAACCAGGTGAGTACCATTTGTTGAGTGCACGTATCTGTCTTAGTTTTATCGCTTTCTTAAATCTCTACATGCCGTCTGATGTCGCCGACTGTATTTTATGCAGAAGTGGACCAACTGGTTTTCTCCTGTCTCGAACGGGAACCCGGCCGAGGAGGAGGAGGAAGGCAGCCAGGAGGGCAGTGTGGAGAGCGGCGAGTATGTCTCCGATAGTGGGGAGACGGAGGAGGAGTCTGGTGAAGAAGAGGAGGAAGACAAAGAGCAGGACTCGCCGCCTCCGCCGCCAGAGCACCGGACCAAGCGCCGACATGAACCTGCAGCTCCCTCGGCCCCTCCAGCAGCCTCAAGTGCCCCGCCAACTGCTCCAGTGGTCCCGATTGCTCAGAGCGCCAAGAGGACCAGGGACACTGCTGCTGAACCAGCAGGTCAGCCTTCCAAGGTGGCCAAACCGAGCGGATCTAAACCTTGGAAGGCTTTGCCGCGGATGAGGGTCGTCGTTCCCGTCACCTCGACGTAAGTGCACTGTTCTTCTAACTTCTTCTGATATTCGATTGAACTCCTGTTTGATGGTCAAATGAATTTCACTCGACAGGGTTGCCACCTCTGCCACCTCTCCGGCGCGCCAGGAGGATGATCCCATGGACGCGGACAACGTCGTCTCGGCCCAGCCAGGTGCGTTGTAGCGATTTCGAGAATTTTATATTATAACATCGCGAATTCTGTCTTCGGTCTTGCCCTTTTCTTTTTCTGAGATCTTGCGCCATTCGGTCTGGCAGGGGCGATTTATGTGGATGAGGGTGACCAGGAGAGACCTGAGCCAGCTGCAGAGCCTGTCCTTGAGGCTGTCCCGCCAGTTACTGCTCTCGTCGCGGACGTGCCGCCGACTGAGGCGATGCCGCCGACTGAGGAGGTGCTGGTGGCTGCTGAACCGACTGGTGCGGGCCTTGGGATGCCTAGGGAGCTTCCAACGATGCCAGGCCCGTCAAATGTCAAGTTCAACATCCAGCACCTCTCGGAGGATCAGGTGGGAGCGGCCAAGGGGGCCATGGTGCAGGCAGAGCTGATGGCGGGAGAAACCAAGAAGGCGTACGAGTTCATCGCCTCCTTGTACCAGCGGAGCTTGGAGCTGCGGGACGATATCCGAGTAAGTGGGCTAGTAAGTATTTACTTTTCTCTTGTAACCCACTGGGTGTGCTCGGATACCGTATGATGTTTGCAATGGGTTCACTCTGAGTGAACCCAGTGGGTGTAGTCCCCGAGACTTCTGTCGAGTGCTTGCACCGATAGTTGTCTTTATGCATATTGTCTTTGACTTGTTCGTATTCGTAAATAATATGGTCGACTACTAACAGTTGGGGCACTCGGAGTACACCTACTGTAAGAGTCCTCGAGAGTAATTTTACTCAGGTCGGGTAGTATTAGCCTCACAGGCTTAGGTGTTGTCATGTAGCTCAATAGGGCTGACCTATTTGAGTTTCATGCCAGTGGGGTCACTCTTAGTGAACCCACTGGGTGTAGTCCTCGAGTCCGCTGTCGACTGCTTGCGTCGGCAGGGGTCTGAAGAACTTGGACTTGTTATTGTTTGATTTGTCTGATCGTCTCTTGGCGCTGACTGGCAGAAAACTTGCGAGATGGGGACAACATATGAGACTCTTAGGGCGGAAAAGGTTCAGTTTGCCGATTAGCTGGATGCGGCACTGATTGCAATGGCTGGAATGAAGGAGGTTCTAGCGGAACGAGAGAAGTCGCTGGATCAGGCTCGTGAAGTGAACAAGGCACTGACTGCTGAAGTTGAGAAGATGGGGAAGCAAAGGTCCACGCTGATGGGACAAATGGATGTGCTGAACAAACGGTGTATAGCGTAGGAGAAATACGTAAGTGACTGGGCTCGGCACATGATGACGCGTCTGGGTGGTAAGTCCTGTTTTTCCGAGTGCTTGTGGTACGTGTGTTACACTCGGCGCTTATTGTTTGCTTGCCCTGTGTTTGCAGATTTTTGCATGGACGCTGAAGCTGAAGCAGCTGACGTGGAGCGGTCGATTCGCGAGAACATTCCACTCGGCGAGGAAGCCAACCGAGACCTGCTCGCAGCGCACATTCGCGTGGGCCAAGTTGGTCCTTTCATCAGTCGACTGAGAGAAGTCGTCGGCCGAATCGACAAGGAGCTTTGGCCTGAAGATGAGTCGCGGCAGGAGATGGAAAACTTGATGAGTCGACTGGAGGAGGTCCCCAACCGAGTGCAGTCATGGAAGAAATCTGCGGCTCGCTGTGGTGCAGACGTTGCTCTGTCCCTGGTCCGAGTGCATTGCAAGGAGGTGCGCAAGGAGAAGCTGAAAGCGTTGAAGGTCGCCAACACGAAGAAACTTCAATTCGAAGACTTCATGGAAACCTTCCTTCAAAGTGCCACCCGCATCGCCGACGGAATCGACCTAGACACCTTCGTGGAGCCCTCCAGTCCTGGCGCCAATCCAGATGACGCATAAGAAAACTTTATCCTCGATATGCCGAGTGTTGATTTGTAAGAAACTTTGGCCACTGCTGTTGGCCGTCACATTCTTGTTTCGGTGCGGGTAAGCTTGATCCGCACTGAGTGAACTATCTTTAGGTGAACTTCAAATTTGAATCAAATCGTTTGCTCTTCTGTTGCAATTTTGACTCGAGTTTTTGTTTGGCGTTTCTTGGTGAAGCCAAAGGCAAACATTCGGAACACGTCAGTTGTCTTGACATCTGCATGAGCCTCATTGAGGGTCTGCGGAATTTCCGATTGGATCTGTATGATCACCGAGTGGATCGGTAGGATCACCGAGTGGATCGGAAGGACGTACTCGAAGGTCAAAGAGTACTTGGGCGATACGGGATCGCAGCTAGGTTGTCGAGTGCGACAATCAGGTTGCACTCGGGGCGAGTTGGTACTGATGTAGTTGTCAGTTGTTTTGACATCCACATGAGCCTCAATGAGGGTCTGCTACTCATGTAGTTGTCAGTTGTTTTGACCTCCACATGAGCCTCAATGAGGGTCTGCAACTCATGTAGTTGTCAGTTGGTTTGACATCCACATGAGCCTCAATGAGGGTCTGCTACTCATGTAGTTGTCGGTTGTTTTGACATCCACATGAGCCTTAATGAGGGTCTGTTGAGTCTCCGAGTGTACCTGTAGGATACAGTCGAAGGCATCTGGGTGCTTAGGCGATTCTGCATCGCAGCTAAGTCCCCGAGTGTGGTGTTAAGTGCACACTCGGAGAAAGTTAATACTTAGGCGATTCTGGATCACAGCTAAGTCCCCGAGTGTGACGTTAAGTGCACACTCGGAGAAAGTTAATACTTAGGCGATTCTGGATCGCAGCTAAGTTTTTTTTTTTGAGACCGGAGTCTGCGACCGCGGAAGAACTTTGAACCTGCAAAAAACTCAATCTGCTTTATATTATTTCACCAATACTTGTTCTTTACATTGCTTCAGTCGACGGTCACGTGTAGAAGCGCTTCAGGAGATCTCCGTTCCATGCTCGCGGCTCGTCTGTCTCCGTGTCGATGTTGTAGAGTCTGTATGCTCCATTGTTCAGCACCTTGGAGATGATGAAGGGTCCTTCCCAGGCAGGAGCCAACTTGTGAGGTCTTTGCTGATCCACTCGGAGCACCAGGTCGCCTGCTTGGAACGTACGACTCATGATGTGTCGCGCGTGAAAACGCCGCAGATCTTGTTGATAAATGGTTGAGCGAGTCAGTGCCATCTCGCGCTCCTCCTCTAGAAGGTCCACTCCGTCTTGCCTTGCTTGTTCTGCCTCAGCTTCGGAGAAGAGTTCGACTCGTGGAGCATTGTGAAGCAAGTCACTCGGAAGGACTGCTTCTGCTCCGTAGACGAGGAAGAACGGTGATCGCCCTGTAGATCTGTTCGGGGTTGTGCGAAGACCCCAAAGCACTGAAGGTAGCTCGGTGACCCTTGCGCCAGCGGCATGTCCCACCTCTCACAGGAGTCGGGGCTCCAAACCTTGCAGAATAAGTCCATTCGCCCGCTCTGCTTGTCCATTGGACTGAGGATGCGCCACGGATGCAAAATCCACTAGGATACCTTGGCTTGTACAGAAACCTTTGAACCTGTCCGAGTCAAAGTTTGTCCCGTTGTTCGTGATTATGCTGTGAGGCACACCGAATCTGGAGATGATGTCCCTGACAAACTTGATGGTTGTTAATGCGTCGAGCTTCTTAATGGGCTTGGCTTCAATCCATTTTGTGAACTTGTCGACTGCCACCAACAGATGTGTGTATCCCCCTTGGCCTGTTCTGAAGGGACCGACTGTATCTAATCCCATACTGCGAACGGCCAGACAAGAGGGATTGTCTTCAACGCAGATGTTGGCTTGTGTGACTTGTTGGAGTAGAACTGACAGCCTTCACATCGATCGACCATATCTTTAGCCATCTCGTTCGCCTGCAGCCAGAAGAAGCCAGCTCTGAATGCTTTGGCAACAATTGCTCTTGAAGAAGCGTGATGACCACAGGTTCCCGAGTGAATTTCTTCCAGGATCAACTGTCCCTCTTCAGGGGAGATGCATCGTTGAAGGACGCCTGAAATGCTTTCCTTGTACAACTGGCCGTCAATGACAGTGAAGGACTTTGACCTGCGGACGATCTGCCTGGCTTGGACTTCGTCTTCTGGTAATTCTTGCCTCAGGATGTATGCAATGAATGGCACAGTCCACTCGGGGATGATAGCAAGAACTTCCATGATCAAATCCACCACTGCTGGGACTTCGACTTCAGTCGGATCTGCGGAACTCTTTGGTTGTACTGGTTCCTCTGTGAAGGGATCTTCTTTGACTGAGGGAAGGTGGAGGTGCTCGAGGCAGACGTCACTCGGGACGGGTCTCCGAGTGGATCCGAGTTTTGCCAACTCATGAGTTGCTTGGTTTTTCAGTCGCGGAACGTGATGAAGTTCCAAACCTTCAAACCTTTTCTCGAGCTTCCTCATCGCATTGCAGTATGTAGTCATGGTGGGGTTCCTGACCTCCCACTCCTTCATCACCTGATTGACCACCAAATCTGAATCGCCGTAGACCATTAGGCGACGGACGCCGAGTGAGATGGCCATGCGCAATCCGTAAAGGAGAGCTTCATACTCTGCCTCGTTGTTGGAGGAATCAAAGTGTATCTGCAGTACATACTTGAGTTTGTCGCCTTTCGGCGATATGATCACAACGTCAGCGTCGGAGCCATTCAACATCTTGGACCCATCGAAGAACATTGTCCAATGAGCAGAGTAGATGTGGGTCAGTTGCTGTTGTTCTACCCATTCTGCTATGAAGTCAGCCATAGCTTGAGACTTAATAGCTTTCTTGGCCTCGAACTTGATATCGCAGTACAACATCTCCATTGCCCACTTCGCCACTCGGCCTGATGCGTCCCGATTGTGGAGGATTTCCGACAACGGAGCATCAGAAACGACAGACACCGAGTGGTCTTGGAAATAATGGGCCACCTTCTTCGCAGTCATGTAAATCCCGTAGATAAGTTTTTTATAGTGGGGATACCTCTGCTTGGAAGGGGTAAGGACTTCGGAGACGTAATACACTGGCCGCTGAACTTTGTATGCTTTGCCTTCTTCTTCTCGTTCGACTGTAAGAACAGTGCTGACGACTTGACTCGTAGCCGCGATATACAAAAGAAGGGTCTCTTTACTGAGCGGAGCAGTAAGAATCGGCTGGGTGGAAAGTAGGACTTTGAGGTCGTCAAATGCGACTTGGGCTTTGTCTGTCCACTCGAAAGTATCTAATTTCTTCATGAGTCGGTACAAAGGAAGCGCCTTCTCGCCGAGTCGACTGATAAACCTGCTCAAAGCTGCTAGGCAACCTGTGAGCCGTTGAACATCGTGTATTCTGACCGACCTCTCCATTCGGACGATGATTCCGATCTTTTTGGGGTTGACATCGATCCCTCGTTCGAAAACGAAGAAATCGGGTAACTTTCCGCTGGGAATGCCGAATGAACACTTGGCGGGGTTGAGCTTGATATCGTACCTACGAAGGTTGCCGAATGTTTCTGTGAAGTCAGTCAGCAGGTCGGAACCTTTGCGTGACTTGACTACGATATCATCCATATACGCATCCACATTCCGACCGATCTTGTCGAGGAGGCATTTTTGGATCATGCGCATGAAGGTAGCTCCTGCATTCTTCAAACCGAATGGCATAGTGATGTAGCAGAAGCACCCGAATGGGGTGATGAAGGCTGTTTTTAATTCATCGGGGCCATAAAGACGAATCTGATGATAGCCCGAGTAGGCATCAAGAAATGACAAACGCTCGCAGCCCGCAGTCGAATCGACAATTTGATCGATGCGGGGGAGCGGAAAATGGTCTTTCGGGCAGACCTTATTGAGGTGCTTGAAGTCGATGCACATTCGGAGCGACTTGTCTTTCTTGCGAACCATGACAACATTGGCGAGCCACTCGGAGTGGTGAACCTCGCGAATGAAGTTGGCTGCCAAAAGCTTGGCTACCTCTTCTCCGATTGCCTTCCTCTTGTGCGCGGCAGAACGTCGCAGGCGTTCTCGGACAGGCCGAGCGGTGGGATCCACATGCAGTCGGTGCTCAGCCAACTCCCTGGGTACACCTGGCATGTCAGAGGGTTTCCATGTGAAGATGTCCCAGTTCTCACGGAGGAATTGGGTGAGCTCGGCTTCCTATTTAGGATCGAGGGTGGTGGAGATGTTCGTCGGGGCAGCAGTGTCATCCGTCGGGTGGATGTTGACCTTCTTCGTCTCTCCCGCCGACTGGAATGCAGACTCCGAAGCTGGCTTCTTCAAGCACATCAAGTCAGCGGGGTCGACTGTTTTCTTGTACTCGTCGAGCTCGAGGACAGCCATCTGCTGGTCGGCGATTCTTGATCCTTGCTGCAGACACTCTTCGGCCCGTTGTCGATTGCCCGTGATGGTGATCACACCTTTCGAGCCTGGCATCTTCAGCTTCAGGTATACGTAACACGGACGAGCCATGAAACGCGCATACGCTGGGCGGCCCAGAATTGCGTGGTAAGCGCTCTGGAAGTCCACCACTTCGAACGTCAGCTTTTCCTTGCGGAAGTTCTTGTCGGAGCCGAAAGCGACGTCCAACGCGATCTGGACGAGTGACTTGGCCTTCCGTCCAGGGACGACTCCATGGAACTGCATGCTGCTCTCGCTGAGTTTGGACATCGGAATGCCCATCCCCTTGAGAGTGTCGGCGTACATGATGTTCAGGCCGCTGCCGCCGTCCATGAGGACTTTGCGCAGTCGGACTCCTTCCACCACCGTGTCGACGACTAGAGCCTGTCTCCCTGGGGTGGGTAAGTGTGCTGGATGATCCGACTAGTCAAAGGTGATCGCAGTCTGAGACCATTTGAGGAACTTGGGGTTGGCAGGGGTGGCCATGTTCACCTCCCTGTTCACCAGCTTCAGTCAACTCTTGCTCTCAACGTCAGCAAAAATCATCGGTGTTGCATGGACTTGGGGGAATGGATCCTCCTTATCTTCTTCATCCTGTTCATTGTCCTTCTCACTCGGTTGCCCTTCGCCGAATCCCTGGATCGGGAGGCGACACTGTCGAGTGGTATGCTTCGGATAAATGGGGTTGCCCTCTTCATCCATCTTAGTATGAACCGGACGTGGTTGGTCCAGGATGGGATTATTGAACTGCTTCTTCTTGGGGGTGAACTGAGCCTTCCCTTTGCCTTTGAACTTGGCATTGGTTACAGCTGCAGCTTCTACCTGCGTAGTGGTCGGAGCTTTCTGCTTCTGCTTCCGAGTGTTATTCCCATCTCCGTCGGCGACTGTCTTGTGCTTACCGCTTCGGATGCGGTCTTCTTCTTCGCCATTTGCATAGCGAGCCGCTATCTCCATCATCTTGCTCATGGAGATGTCGCCTGTTCGGCCGAACTTCAGGTACAGATCCCTGTACCGCACGCCTGCCTTTAACGCGCAGACTGCTTGATGCTCTGTGACGTTCTCCACCGTGTGGTAGAGAGTTGTCCAACGCTGAATGAAATCACGCAGGGGCTCATTCTGCTTCTGGACGCAATGCTGGAGCTCCACGAGGCCCGCAGGGCGCTTGCACGTCCCTTCAAAGGTCCTGATGAACACTCGGGCCAGATCTGCCCAACTGTAGATGCTTGAGGGGGCCAACTGGTTCAGCCACGCTCGCGCCGAGCCGTCGAGCATCAGAGGGAGGTGCTTCATGGCGACATGGTCGTCTCCTCCTCCGATCTGGACTGCCACTCGGTAATCATCCAGCCACGTTTCTGGCTTGGACTCTCGTGTAAACTTGCTAATTCCCGTCGCCAATCGGAAGTTGGGAGGGATGTCAGCCGAACGGATGGCTCGACTGAAACACTCGGGGCCAGTAACGATGGTCCTGCTTGCTCTCGGACGGTCAATATCGCGACCATCGCGGTGGGCTCGGCCCCTGTCGACCCTCCGCTGGGCGATATGCCCTCTCGCGTCGGTCCTTGGGTCGTAAGTGTCACCGACTGAACGCCGATCATCATGATGTCGGGACCCGTAGGGCCCACCCCGCGGAGGGGTGCGTGAACGGCGATGATCTTCGGGGTTTATGGAACGGATGCCACCCCTGTGTCGCTGATGAGAACCAGGGCTGTGAACTGACCGATGCGTATTCGCATGAACAGAACTATTGTGGATCATGTTGTGCGACTGGGAGACAGTCGAATTCTGTTGCTGCGCCGTGTGCAGCAGGGCGCGGATTTGCTCGATTCCCCTGCCAGCCTCTGAATCAGTCGGCTGAAGGGAATCGGCTATCTTGGCAGCCGCAGCCAAGTTGAGGAGGGGTGTGCAGAACAACTCCACGTTGCTCCGTCGAGTGTGCCGACTGGTAGAACGGCGAGGCGGACGACGCGCGCCGGACGTTTCGCCGATCTCGTGCTCGTTCCGGCCAGCTTGACGGGGATCTTCATGGGAGTTGGCCATGTGTACTTCTGCTGCAGGCCCGCGACCCGCGTACTCGGAAGGAAACTCAGTCGGAACCGAGTCCGAGCGCTGGGACGGCGGGGCAACCACAACCGACTCTAGGACCGCCACTTGTGAAGATGCGTTCTGGCGCGCCTGGGCGTGTTGCACCCAACGCTGGAGCCGCTGACGGTGGGACCGCTTGTTGTGGCGCGTGACGGCGGTGTAGGCCGACACCGGAGCCGACTGCTGGAGAAGAAGAATGCCGCGGGCGCCGGCATGGAAGTGTGTAGCCCCGTGGCGGGGAAGCGCCTCAACGTCGAGAGGGGCGTCCCGAAGCCATGCCGAATCGTCGACGATGAAGGAGAGAGCACCGAAGAAGATCTCGCGACTCATGCTCGAATCTCCACCGGATGACATGACGAAATGATGTAGTCGCAAACTCGCCGGAAGTCGCTTAGACGCCTGCCCCACGGTGGGTGCCAACTGTCGTGGGTATAAGCCTGACAGTAGATGTGTAGGGTACGAAAAGGATGGGCAGTGTCCTAGCTACGGCGAGGTTGTATGAGTTCAGGCCCCTCTGTGGTGGAGGTAATAGCCCTACGTCTCAGTGCTCTGGGAGCTTGGTGTCGAGTGGAATATGGAATACAATGATTTGCTCACCCCTGCACCAGTGGGGGAGGGTGGCTTATATAGAGTGCGCTGCCCTCCACAACGGTTCCGGTACGGGGGTGGAGTAGTGGCGATTGAATGCCTACGTTACAGGTAATGTACGTCCTAAATGCTAATAAATGCACCTGGAAACGTACGACCGTTTCCCTCCAGGGGGGTTACGATGTACCGAGTGGAGTCCAGTCGGTTAGTTTGATATTCTCCGAATGCTAGTCTCCGACTGGATGGTCGAGGACCTGTTACCGACTGGACGATGGGGACTCCTTAGTTCAGTCGGAACTGACTAAGGGCCTTGTCCCTTATGAGGGGTAGTCCTTGGGTAGGACCTACAGGGCAGGCCTATGACTCTACCCTAGGACTATAACCCCATCAAACCCCATGAAAGAGAGTCGTCTGGTAGGGATGAAATCATTGCTCTTGCCTCTATTGCCGTACCTCCTACGGATCATTTAGAGCAATATCTGCTTGAGCATGAAAATGATATGCATATGGAGGAGAGAGATGAGATAGATAGAATTGTTTTAGAACAATATCCTATTCTCAAGAATAATCTGCATGTTGAACTGCTTGGGGATCCTCCCCCACCAAAGGGTGATCCTGTGTTCGAGCTTAAATAGTTGCCTGATACTCTTAAGTATGCCTATCTTAATGAGAAGGAGATATATCCTGTCATTATTAGTGCTCTCCTCTCAGAGCGCGAAGAGAATAATTTACCAAAAACTCTGAGGAAGCACCGCGCTGCTATTGGATATACTCTTGATGATCTTAAGGGTATTAGTCCTACTCTATGTCAGCACAAGATTAAAACAGATCCTAACTTTAAACCAGTTGCTGATCATCAAAGGAGATTAAATCCTAAGATGAAAGAGGTTGTTAGAAAATAAATATTAAAGCTTCTCGAAGCAGGAATCATTTATCCTGTTGCTCATAGTGATTGGGCAAGTCCAGTACATTGCGTACCTAAGAAGGGAGGTATCACCGTCGTTCCTAATGATAAGGATGAACTAATCCCACAAAAGATTATTACCGGCTATAGAATGGTGATAGACTTCCGGAAACTGAACAAGGCAACCAGGAAAGATCATTATCCTTTGTCGTTCATCGACCAAATGCTAGAAAGGCTATCAAAGCACACACACTTCTGCTTTCTTGACGGTTATTCAGGTTTCTCGCAGATACCTGTTGCACAATCTGATCAAGAGAAAACCACTTTCACCTGCCCTTTTGGTACCTTTGCCTATAGACGTATGCCTTTTGGCTTATGTAATGCACCTGCCACCTTCCAAAGATGTATGATGGCTATATTCTCTGACTTTTGTGAAAAGATTGTCGAGGTTTTCATGGATGACTTCTCCGTTTACGGGTCTTCCTTTGATGATTGCCTCAGCAACCTTGATCGAGTCTTACAGAGATGCGAAGAAACCAACCTCGTCTTGAATTGGGAGAAGTGCCACTTTATGGTTAATGAAGGTATTGTCTTAGGACACAAAATTTCTAAGAGAGGCATTGAAGTTGATAAGGCTAAGGTTGATGCAATTGAGAAAATGCCTTGCCCCACAGATATTAGAGGTATACGAAGTTTCCTAGATCATGCTGGTTTCTATAGAAGGTTCATTAAAGACTTCTCTAAGATTTCTAGGCCTCTTACCAGCCTCTTGAAGAAGGATGTTCCTTTTGTTTTTGATGAGGATTGTGAGGAAGCCTTCGAAATACTTAAGAAGGCTTTGATAAACGCACCTATTGTTCAACCACCTGACTGGAACTTGCCCTTTGAAATCATGTGTGACACTAGTGATTACACTGTTGGTGCTGTTCTAGGACAGAGAATTGACAAGAAGTTGAATGTCATTCACTACGCTAGTAAAACTCTAGACAGTCCCCAAAGAAACTATGCCACTACGGAAAATGAATTTTTAGCAGTCGTGTTTGCATGTGAAAAGTTCAGATCTTACATAGTTGACTCCAAAGTCACTATTCACTCTGATCATGCTGCTATTAAGTACCTCATGGAGAAGAAGGACGCTAAGCCTAGGCTGATCAGATTGGTTCTCCTGCTACAGGAATTTGATTTGCACGTCGTTGACCGAAAGGGTGCTGATAACCCTGTAGCAGATAACTTGTCTAGGCTAGAGAATGTCCTTGATGACCCACTACCTATTGATGAGAGCTTTCCTGATGAGCAATTAAATGTCATCCGCACTTCACTTAGTGCACCAAGGTATGTCGATTATGCAAACTATATCGTAGCCAAATACATACCACCCAGTTTCACCTATCAGCAAAAGAAGAAATTCTTCTTTGATTTGAGACACTACTTTTGGGATGATCCTCACCTTTATAAGGAAGGAGTAGATGGTGTTATTAGACGTTGTGTGCGTGAACATGAACAGGGACAGATCCTGCAGAAGTGTCATTCCGAAGCCTACGGAGGACACCATGCTGGAGATAGAACTGCCCATAAGGTATTGCAATCAGGTTTCTATTGGCCCACTCTCTTCAAGGATGCCCGTAAGTTTGTCTTGTCTTGTGACGAATGCCAAAGGATAGGGAACATCAGTAAGCGTCAAGAGATGCCTATGAACTATTCACTTGTCATTGAACCATTTGATGTCTGGGGCTTTGATTATATGGGACCCTTCCCGAGTTCCAATGGGTACACTCACATCTTAGTTGTTGTGGATTACGTTGCTAAGTGGGTAGAAGCTATCCCCACTAAAAATGCTGATCACCACACCTCTATTAAGATGCTTAAAGAAGTCATATTCCCAAGATTTGGAGTCCCTAGATACTTGATGACTGATGGCGGTTCACACTTCATTCATGGTGTTTTCCGCAAGATCCTAGCTAAGTATGATGTCAACCATAGAGTTGCATCTCCTTATCATCCTCAGTCTAGTGGTCAAGTAGAGTTGAGTAATAGGGAGATCAAGTTGATCCTACAAAAGACCGTCAATAGATCTCGAAAGAACTGGTCTAGCAAACTTGACGATGCACTATGGGCTTATAGGACTGCTTATAAGAATCTCATGGGAATGTCACCGTATAAAATGGTTTACGGTAAGGCTTGTCATTTACCTCTTGAGCTGGAACACAAAGCTTATTGGGCAATCAAAGAGCTCAACTTTGATTTCAAACTTGCCGGTGAGAAGCCCGGGCATATGAGAATGCCAAGTTGTTCAAGGAAAAGGTTAAAAGATGGCACGACAAACGAATACAGAAACGAGAGTTCAATGTAGGTGATTATGTCTTGCTATACAATTCTCGTTTGAGATTCTTTGCAGGCAAGCTTCTCTCTAAATGGGAAGGTCCCTATGTTGTCGAGGAAGTATATCGTTCCGGTGCCATCAAAGTCAATAACACGGAACGAAATTTTCCTAGAGTGGTAAATGGGCAAAGAATCAAGCATTACATCTCTGGTACTCCCATAAATGTTGAGACCAATATCATCAATGTCATAACTCAAGAGGAGTACATAAGGGATGTTTATCAGCCTGTTTCAGACCTTGAAAACGAAGATGTATCTGTTTCGGCAAGAAATTGGACTCCGATACTTTTCCAATAGGAAATTTCTTCCGTTTTGGAATTTTTGGAAAATTAGAAAAATAAAAAGCAGTCCGGAGAGCGAACGAGGCAGCCACAAGGGCCCACTCCGCCACCACCCCCTGGTGGCGGTGGGCAAGCTTGTGGGCACCTCGTGTGCCTCCCGGACTCTGTTTTCTTGCGGAGGACTCCTTCTGGCCCAGAAAAAATCAATATATAGTCGCCTGAAGGTTTTGGTCTCCGTATCGTGCAGTTTTCCTCTGTTTTCATTTCGAGCTTGTTCTGCCGCAGATTTAGAGCAAAGATGTCTCAGGAATCTGTTGGGGAGAATGATCTTCACCAAGTTCATGAGGAAGTAGATGCTGATTTGAAAAGAGTAGAAGTCCCGGAAGCCACGGACCAAGCTAAGGAGAAAACCCAAGCTAGGGAGGAAGTTCAACCTATGTTCAACATTGAAGACGTTGAAGGAGTAGATTTTCTCCAACCCTTCCTCCAAGTGCTGTCTCCATCCTTGATTGAACTCTTGAGGTTTTGCGAAACAACTCGTGCTTGCAATATTTCTCTTTCTCGTGAAGTTGTTTTGCTAGAAAACCATGTCACAGATCTCAAAGGTATAAATCAAAGATTGATAGCTCTCTTGGAATCAAAGGCGACAACAACACCGGGGGGGGGGGGGGGAGACAACTAAGCATTGGTATGGGCAATCCCCTTGGCTTCTTCCAAGCTTGGGGGAGTTGCCCTGGTATCGTATCACCTTTATATCTTTTGCTTTCACCTTTGTTTTAGTTCTTTCCATTTCAGTTTTTATTTCTTCTTTTAGAGGAATAAGTCTTTAGTTTTTAGTTTGAGTCCTTTGCTTTTGTCTCTCCCCCGATGTATTCGAGCTTACGAGCTATATAATAAAGAGTGTCTTAGTTAAGGGCTTTGCTTTGTGCCATGATCAATAGTATGAAAAGAACGATAGCATGAAAGATCATGAGACGATCTTATGGAAAGTGATAACTTCACTTATGACACGTATGATGATTGAAACTTATTGAGAATAAATCAACATAGACATTAGTCATTGTTGCAATTAATAAGAAGTAATAAGGAAAGAGAGGTTCACATATAAATATATCATCTTAGACACTTTTTACAATTGTGAGCACTCACCAAACTATTACATGCCTAGGAGTAGATGTTGGACAAGGAAGACAACATAATGAATTGTGTTTGCTTGGTTCCAAACAATGTTATATGATTAGAGATCCCTTAGCATGTGACGATTGCTTCCACCTCATATTAGCCAAAACTCCCGCACCAAGTAGAGATACTACTTGTGCATCCATAAACCCTCTAACCAGTTTGCCATGAGAGTCCACCATACCTACCTATGGATTGAATAAGATCCTTCAAGTAAGTTGTCATCGGTGCAAGCAATAAAAATTGCTCTCTAATATGTATGATCTATTAGTGTGTGGAAAATAAAATTTGTACGAACCTGTGATGAGGAAGACATAAAAGCGACAGACTGCATAATAAAGTTCTTTATCACAGGAGGCAATATAAAGTGACGTTCCTCCGCACTAAGAGGACACACATTCAAACCTCAAAAGCACATGACAACCTCTGCTTCCCTCTGCGAAGGGCCTATCTTGTACCTTTACTTTTTACCCTTGTAAGAGTCATGGTGATCTTCACCAGTTCCCTTTTTTGCCTTTGTCTTGGCTACCGTCACATCCTTGGGAAAGATCTATATTCATATATCAACTTGGAGTTGAGTACTTATGCTTTATTGTTGTTGACTTTACCCTTGAGGTAAATGGTTGGGAGGCAAAACTATAAGCCCCTATCTTCCTCTGTGTCCAGCTGAAACTTTGACACCATGAGTACCACGTGAGTTGTAACAATTGTGGAAAACAAAAGAGATGATTGAGTATGTGGGTTTGCCTTACAAGCTCTTATTTGACTCTTTCTGATGTTGTGATAAATTGCAATTGCTTCAATGACTATGGACTATTGTTGGTTACTTCTCGGTAAGGTTTTTGCTTCATGCTTTGCTTTGTGAAGGAATTGTTACTTTCCCATAAGAATCTTTATGATGTATTGTTGTTCTATGTGTGATCATGATGCCCTCATGTCCGTGTTATGTTTTATAGACACCTTCGTCCCTCAACGTGTGGACATGTTTATGGAACTTGGTTTTCGCTTGAGGACAAGCGAGGTCTAACCTTGGGGGAGTTGATACGTCCATTTTGCATCATGCTTTCATGTTGATATTTATTGCTATTTGGGCTGTTATATTACTTGTGGTACCATATTTATGCCTTTTCTCTCTTATTTTGCAAGGTTTATTTGAAGAGGGAGAATTCAGGCAGCTGGAATTCTGGACTGGAAAAGGAGCAAATCCTAGTCCACTATTCTGCACATCTCCAAATGCCCTGAAAATTTACGTGGATTTTTTCTGGATTATATTAAAAATACTAGGCGAAAGAACTACCGGAGGGGGGCCACCAGGGCTCCACAAGCCCCCACTCCGCCACCACCCCCCTGGTGGCGGTGGGCAAGCTTGTGGGCTGCCTGACGGCCCACTAGCCCCCCCCCCTCTTTTGCTATATGAAGCGTCCTGGTCTGGAAAAAATCGAGAGGGAGCTTTTTCGTGGTTTCGCCGCCGCCACGAGGCGGAACTTGAGCAGATCCAATCTAGAGCTCCGGTAGGACGATCCTGCCGGGGAAACTTCCCTCCCGGAGGGGGGAATCGTCGCCATCGTCATCACCAACACTCCTCTCGTCGGAGGGAATGCATCTTCATCAACATCTTCATCAGCACCATCTCCTCTCCAATCCCTAGTTCATCTCTTGTAACCAATCTTCGTCTCGCGACTCCCATTGGTACTTGTAAGGTTGCTAGTAGTGTCGATTACTCTTTGTAGTTGATGCTTGTTGGATTACTTGGTGGAAGAGTTTATGTTCAGATCCTTGATGCTATTCATTACACCTCTGGTCATGATTATGATTATGTCTTGTGAGTAGTTACTTTTGTTCCTGAGGACATGGGATAAGTCATGCTGATAATAGTCATGTGAATTTGATATTCGTTCGGTATTTTGATATGATGTATGTTGTTTTTCCTCTAGTGGTGTTATGTGAACGTATACTACATAACACTTCACCACATTTGGGCCTAGAGGAAGGCATTAGGAAGTAGTAAGTAGATGATGGGTTGCTGGAGTGACAAAAGCTTAAACCCCAGTCTATGCGTTGCTTCGTGAGGGGCTGATTTGGATCCACTAGTTTAATGCTATGGTTAGACTTTGTCTTAATTCTTATTTTGTAGTTGCGGATGCTTGCGAGAGAGGTTAGTCATAAGTGGGATGCTTGTCCAAGTAAGGGCAGTACCCAAGCACCGGTCCACCCACATATCAAACTATCAAAGTAACGAACGCGAATCATATGAACATGATGAAACTAGCATGAGAGAAATTCCCGTGTGTCCTCGGGAGCGTTTTTCCTCCTATAAGACTTTGTTCAGGCTTGTCCCTTGCTACAAAAGGGATTGGGCCACTTGCTGCACCATTGCTATTACTTGTTACTTGTTACTCTTTGCTTGCTACGTTTCACCTCGCTACACAATCACTTGTTACCGCTACTTTCAGTGCTTGCAGTTATTACCTTCCTGAAATCCGTTTATCAGAGCCTTCTGCTCCGCGTTGGGTTCGACACTCTTACTTATCGAAAGGACTACGATTGATCCCCTATAATTGTGGGTCATTAGCATCCTGCTTCATCTTAGCTGCCTCCTAATTCTTCATTCTCGAACGGCTTTTGTAAGAGTCGCTCGAGTCCTTAAACCCCTCAATCCACGGAATAACGCATTTGCCTCGTGTTCGTCCCGGGTGTTCAGGATTCTTGAGGGCGCGTGTAAGCTCGTTGTTCTCTCTCTGGGCTGGAACACCCCCGTTCGAGCATCTTCTATTGCAGCAAATATAGCTTGAGAGGCATTTTTAAGACTTGCGTGCTCCACAAGCAACCGTGTCTTTGGGTCCAACTTTCCCCCATGCCCATAAAACCAATTCCTGCATCTTTCAGGCCACGTGGATGTTTGCAGAGTGACCCCTGCATCAATCATCTTCTGCTCAAATTCATCCCACTTAGGAATGCCACTCTTGTAGCCACCTCGGCCCAGAGAATGGTGATGCTCTTTTTCCTGAGCATTTTCCTTGTTTATCCTCGCCAGCTCCTTAGTTGTTTCTGATTGCTTGAACTGCACAAATAAGTCTCAGTGATCTTTTATCTTCTCGTATTATCGAGTGAATTCTGGAGTCTTGCCTTGTTTGTCGAAGTCGGTCCATAACCTTTTCTTCCAGTTACAGAATTGGGTGGCCATCTTCTTAAGAGAAAACTTTTTGACTTACTCACATTGTTCATCTGAGAAATGCTCTGGTAGGGTGAAATGTGTCATGAGCGTATCCCAAAGCAGATTTTTTGCTCTTTCGTCCAGAAAACTAACTTCTCGATCTTGCTTTGGCCTATGCCATTCTTGAATGAATATAGGGATTTGTTCCCTCACAATAACTCGGCATTGACGTACAAATTTGGATGCATTCTTTTTGGGATCAGTTGGTTCTCCATCTAATGTTATCGTGTCAATGTTGTACCTTGTGCCCTCGGGCAACTTTTTGGCCAGGCCTCGTACTGCCCTGTGATACGTCTCCAACGTATCTTATCGGATTGAGTCTTTGAGAACACTTGATGTATGTCTTGCACGTGTCTATCTGTTGTGATCAACTTGCGGGTTTGTGACAATTGGGAACCTATGCATATGGGTTGGCACACGTGGATTCATGTGAGTACTTGATGTATGTTTTGGTGATCAACTTGCGGGTTCGTGACATTGGGAACCTATGCACAGGGGTTGGCACACGTTTTGACTCTCTGGTAGAAACTTTGGGGCACTCTTTGAAGTTCTATGTGTTGGTTGAATAGATGATTCTGAGATTATGTGATGCATATCGTATAATCATGCTCACGGATACTTGAGGTGATAATGGAGTATCTAGTTGACATTAGGGTCTTGGTTGATATGTATCTTAAGGTGTTATTCTAGTACGAACTCTATGATGGATCGAACGGAAAGAATAGCTTCGTGTTATTTTACTACGGACTCTTGAATAGATTGATCAGAAAGAATAACTTTGTGGTGGTTTCGTACCCGACAATAATCTCTTCGTTTGTTCTCCGCTATTAGTGACTTTGGAGTGACTCTTTGTTGCATGTTGAGGGCTAGTTATATGATCCAATTATGTTATCATTGTTGAGAGAACTTCACTAGTGAAAGTATGAACCCTAGGCCTTGTTTCCACGCATTGCAATAACGTTCGTGCTCACTTTTACCATTTGTTACCTTGCTGTTTTTGTAATTTCAGATTACAAAAACCTATATCTACCATCCATATTGCACTTGTTTCACCATCTCTTCGCCAAACTAGTGCACCTATACAACTTACCATTGTATTGGGTGTGTTGGGGACACAAGAGACTCTTTGTTATTTGGTTGCAGGGTTGCTTGAGAGAGACCATCTTCATCCTACGCCTCCCGTGGATTGATAAACCTTAGGTCACCCACTTGAGGGAAAATTGCTACTATCCTACAAACCTCTGCACTTGGAGGCCCAACAACGTCTACAAGGAGAAGGTTGCGTAGTAGACATCAAGCTCTTTTCTGGCGCCGTTGCTGGGGAGGTTAGCGCTTGAAGGTATATCTTTAGATCTTGCAATCGAATCTTTTTGTTTCTTGTTCTTTTGCTAGAAAAGTACAAAAAAATGGAATTGAGGATGCCTCATATGCTCCACCTTTTCAATGTCTTTCGTGAGCATGATGGGAAGGAAATTTGTGCTCAAGTGCTGAAAGAAGAATTACATAGAATGCTTGGCATAGAATATGTGAATGATGAGCATGATTGCAATGTTGTTAGCATGAATTCTATGAATACCCATGATGCTAATGATATGCAAAGCCACAAGCTTGGGGATGCTATATTTGATGAAGATGATCTTTTTAGTTCTTCTACTTTGAATGATCAAAATTATTTTGATGAAAGCATGCCCCCTATCTATGATGATTATTGTGAGGATACTTATGCTTTGAAGAAGAGGGATGATAAATCTTGTCATACTTTCGAAAACCCCTTTTCTAAACCTTGCTTTTTCATTGTGGACACAATTTGTAGTGCGCAAGTCTTTTAAGATACTCCCACTACTATTCTTGAGAATAGATTTCCTTATGTGGAGAGTAGTAAAATTTATATGCTTGTAGATCATGAAAAGAAAGCTTTAGGTGCTGGTTATATTGTTGAATTCATTCATGATGCTACTGAAAATTACTATGAGAGAGGATGAAAGTGCAGTCATGCCCTTAATCGTGTTTTGGTGTTGCTGACAACACACATATAGATAATTAATCACTAACCCTTTTTAAGCTATTGTGAATGATCATGTGTTGATAAGGACAAGCTCATGTGCTAACAAGGACAAGATCAAGAAAAGCATTCCTGAGCACTACATGCTTGATCCTTGTAGATGTTCACATGGTGGACAAATGAAGATAAATATATAAGCTAGGCTTTCCACATTGTGTATGGGAGAGCTACTTGAAGATTTCATCATGTCTTGCTTTCAACATTGAGCCAAGAAGGAACAACAACATCAAGCTCAAGTGAAAGGGCTAACTCAAGGTATCAGTTACTTTGATGTTAGCGGTGCGGAGTGATGATCAGTGAATAAAAGTACACACTCAAGTATGGATCATCGGTATCCCTTTTACAATTCTTGAGTCTTTAGGGATCCCGCACTATTAAGAGGGGATCACAGGTTTTTGTGATGAACTTGCTCAAACTATATATCCACTATTCTGCTCAATACCACATATTCTCTACTCTGCTCCTATCTCAAAACAGGTCTAATGTCTCGGACTTCCGGCTCCCTCCGAACGTCCGAGGGTCGGTCAAGGGTCGGACGACCGACAGGCTTCGGAAATCCGGAACCCTGCACCAGAAGAATTTGAGCCCTATAACTCGGATTTACGGCTCCCTCCGGACATCCGAGGGCCGGTCGACCGACCAGCTTCGGAAATCCGGAGCCCTGCACCAGAAGAACGTGAGCTCTATAACTCGGATTTCCGGCTCCCTCCGGACGTCCGAGGGCCGGACGTCCGACCCCTTCGAAAATCCGGAACCTTGCACCAGAAGAAGTTGAGTCGAATAACTCGGATTTCCGGCCTTCTCCGGACGTCCGGTCCCTGTTCAACTCACAGTGTTTCCAGACATAGCTACAACTCTCGGACGACCGACCCCTGTCGGACGTCCGACCCCTTGCGTACGCCCGGACTTCCGTAAACTGCCGGACGTCCGAGCCCTGTGTGACTTAAAGTGTCCCCAACGGCTGTTTTACACTCCCCACTATATATACCCCCCTCCCACTTCGTGAGAGGTTGTCCAACACAGCCATATCCTCATAAGAACACATTTCTACCTCACACACATTTGCTCACACCAAATCTTAGATCCCAAGAGCATTTGTGATCCCCTTTGAGAGTTGTTCCAATCAAAAGATAGATCGTCTCCCTCTCCTTCTCTCAACCCAAGCTATTTGAGATTTGAGCAAGTTTTGAGCATTCCCTGTGATCTTGTTACTCTTGGAGGTTGGAGACTCCTAGGCGGTAGGAGTTCTTCGGAGAGGAATCAATCAATGTGATTACCCCCCGGAAAAGTTTGTGAGGGTTTGGAAGCCACCTCAAAGGCTTACCACTAGTGGTTGAGAAACGCCTTCGTGGTGTTATCTCAAAGGGAGAATGGGGTGAGCCTTCGTGGCATTGGTGTGCCTTCGTGGTAACATCCACCTCTCTAACGGTGACTAGCTTCCCTCCAAGGAAGTGAACATCGGGATACATCTTCGTCTCAGTGACCTTGGTTATCCTTAACCCTAACTCCTTACTTGCGGTTTACTTGTGTTACTTGAGCATACATACATTGCATATTGTTTGTGCTCATTATATTGTGTTGGCTATTTCTTTTACAAGATTAATCATTCAATCATACCTTCTATATCCACACGTTTATACTTGTAGCTTTTGATATATCATGTGATATAGTGTGATCTAGTATCTTGTGTTGTTCACCTACTTGTCGTGTGATATAGCTCAAGTAAGTTTGTGTAACTTACTTGTGCTTGTTAGTAACTGTATTGTGTCCATCTTGGTAGATCGTGTTGTTGATACACGTTGCAGTGCCTAGTGCATTTAGGATTTGTGCTTGACAAGTACCCTCTTTGTTTATTTCCGCATTAGTTTCAAGCCAAATCCGAAGAAGTTTTTGAATAGCCTATTCACCCCCCCCCTCTAGGCGTCATCGAGGTCTTTTCAATTGGTATCAGAGCAAGGTCTCTCTTTAATTAGGTTTCACGACCTAGAGAGTATCGATGTCGACTATTGGATTAGTGCACAATGACACCTTTGACTCTGATGGCACAAATTATACCCTATGGAGAATTCATATGCTTCATCACTTTCGGGCCATGGGCCCAAATACTTTACGAATTGTTCTTGTAGGGATTGCCGACAAAAAGGATGATGCATCTTCATCTACTAATGAAATGTATCTTGATTGTGAGGCTTTTCTTGCCATTCATCGAACCATAAGTCATGAAGTGTTTAAGTCTATCTCGACTTGCAAGTCAACTCATGAAGTTTGGACTAAACTTGAAGATATATATGGTGGGTCCAATCTTGATGAAGACGGTATTATAATGAAGGAGTTGGTGCATGAGCTCTTCACTCTTTTCGATCTTAAAGAGTCCACCACTACTTCCATATCCGATTGCTTGCACACCTCAGCATCTTCAATCTCACAAGGTAATGACATGGTGAGTGAAGAAATATATGCTGATGAAAATGTCATAGCCTCTATGGACACGAGCATATATAGCACTACACATAGTGTAAATTATTGTGCTGATAGGTCATGCATTTTACCTAAAGATCCCTCGACAAATGTCTGTGGTGATATGCCTGCTTCCTCGTGTCCTCTCGATCAAAATATCTTGTTTCTCCCTAGTTGCTCTATGACTAATCATTTAGGGGAAATCAAGAAATATGAAGTACTTTTGACTAACGAAGAATCTAATTCACCAAAAGAATCATCATCAACTCCTCCAGTTCACATGTGCCTCATGGCAAGAGGTAATAATGAGGTATCATCTTCCCTGTGCAATAACGATGATATTTGCGATGAGGATGATGATGATGACTTGACTGAAAATATCTATGTGATCAGTAAAATTCCTCATAAAGCTAAAAATAACGCTCTTCAAAGGTTCTGATGTTCTTGCTTACTTTGAAAATTGTAATGATTCACTTAATCGTGAACAAGCTAAAAGTGAACAACTTGAACATGAACTTGAGAAGAGTCATCAAGCATGTAGAGACTTAAGATCTTCAAAAGGAGAGATTGAAGTTACTCATGATAAACTTAAAAGGGATTTTGAGGTCCTTCTCCTTGAATGCAAGAATGTCAAGGGAGAGCTCGTCAAAACCTCTAAGATCTATGAGGAGCTTCAATCTACTCATGAGAAGTCTCTAATCGCTACTTACTCCTCTCATATTGTTGATGATACTTGTACATCTAACCCTATCTCTTTTGAAGTATCAACATTGAAGGAGAATGTTGAGCTACGTACTCAACTTGATTTACTAACTAGCAATTATGGGGAGTTGGAAGAAAACCATGTAATGCTCACAAGCTCTCATGCCGATCTTCTAACATCCCATAATGTGCAAAAGTTAGCTCATGAGGCTATCATCACCAAGGAAACATCAAGTGAGCCTCATGTGGACAATGGCACTACTTCTAATCAAAGTACTATATTTCCATGTGTTAGTCCTTGTAATTCGTCTACTCACAATGTTGCTACCTCGTGTGATGAATTACTTTCCTTGCCTTGTTGCTCTAACAATGAAACTTACACTTCCCCTAGTATTTGCATTAAAACTAACCGTGCAGAGGAAATCGAAGAGCTCAAGGCCCAAGTCACTTCTTTGAAGAAAGACTTGGAACAGTGTCATGAAGGGATGTCCACACTCAACAACGTCCTGTGTGGGCAAACCTCTCCGAATGACAAAAATGATGTTGGAGTAAACTCAAACAAGAACAAGAGTGGCCTAGAACGAGTTAAGAATTCGGCCAAAATCATTTGCTTCAAGTGCAAAGTTAAAGGGCACCATGTTAGATCTTTCCCTCTGAAGACGAAGTCTCAAAGTCACAAGCAACAAGGGAAGCGGCCACAAACTCAATCGCACACTCAGCTACAAGTTGAAGGAAGGCCTCTTCCCAATAAGACCCAAGCCAACACTCCCCGAGGTGAGAAATCAACTGGGAAGAAAACAAAGGGTAGATGTTGCTACTTATGTCGTGAGAAGGGTCATGTCGCTTCGTCTTGCACGAGAGGTAACTTATCCAACCCAATCACTATTGATGATAGCTATTCCCTTGGGAAGGATAAGGTTGGCAATGTGTTTGCCAAGTTTGTTGGAACTCAAAATGGTGTCAAGAAAAGAACCATTTGGGTTGCCAAGCCTATTGTGACTAACCTCTTAGGACCCAACGTAGTTGGGGACCAACAAGCTCAAACTTGATCAATAGGTGACTCTGGAGGACATTGGAGACTTGGATACACAATGAAGATTTGAGGACTCTTCATCATTCGTATCATCTCAAGCCAAGTCACTTGGATTATCGAGCCCATATCCCATATCCAATGTGCCTCTTTGCGGTGACTTGTACTTAAATTGTTTACATTGAAAGTTGCCTGCCCCACTCCCTCTCATGTTTAGGTTTGGTTCCTAGCATGTACTTTGACATGTTGCGCCTACTAGTATGATTGTTATATGTTATCTATCATGTGTAGGTCGTTATGTATGTCATATAGTTGTGTGTAGTCCTGATCATTACTTGCCTCCTAGTTGCACCGTTGTGTGGGTCTTTTGCGACGTTAATAGCTCATCACATTAAGGGGGAGTGTTTTGCTCTACGCACACCACTAACCCAAAATGTGTACATATGTGTTGGACTCCATGTAGTATTCGGTACAAGATTATCCAATCAATTAGTTTGATGTCAAGGCCATCTGAAGTTTAAATCGGCATCCACTTATCACCTTAGTTGGATGATTGATTGCCTTGTATGATAAATACATGGATTATCACATTATGTGAGGATGATATGCTTTGTGCATGTCACATCCCCTGGTAAGACAAAACATCCGATGTATGCCACTCAGATTCCACCACATGTGGTTATCCTATAACTGTGCGGTGTGTCATGCTCCACATATCTTAATTCGCATAATAAGCCATGTTGGTATCTAAATTCCTTAGATGTGCGTGAGTATAATGTCCTACTACACCAATGCTCATGGCTTAGCCGCTAGATCGTATCTAAAAGAAGGGAATTGTTGATGCATGCCTTTCGAATTAATCCTCCACACTATGATCTAACTAATTGGGATGTTAACGTATGTCATCTAAACATTATGCTTATGGTTGAACTCCCATATCACACTTGTGTGAGTATAAAACGATTCTTGTGCTCGTTTGGCACCTACCACCACTGATAACTCTAAATGTCATTGTGTTCTCTCACACATGGTATCTCTGGCTTGGTAGTGTTTTTCATGGTCATTTTATTTCGGCTCTATCTTCAGTTGACCTACATAACGTGCCGAGAAATTCATGTGTCTCCCAGTAGAGCTCGCACTACTTATTTCATAATGTTGTGGGAGTTATAATCATATTACCTACACTTATAAATCTACTAGGGTGAGACATGCTTGTAAGGTTGTGCAAAATGCATGCCTTACATGGCTTGATGCCTTGACCAGTTCATGTGTTGAACTTGGGGTGCTACCATGTGTTGATTTGTCACCCTGATCCATTTTGGATGACATGAATGTTCTGTAATAGAAAATTATGTGTTCATTTGTCCAAATTGTATATCCTTGGATTTTGATAGGATTGTGTAGGCATATCTACTATGTGTACATGCACATGCCTTGTCTATCGTATCTTTGATCCAATATATGTACATGGTAAATTAGACGTATCCATTAAAAAGGTTAGGGTGTGCTTGAAAGTAAAACTTATATCTATATGCACATAATTGAGTGATCTTACCCTATATATATATTGTAGTTGGACTAACTACTTCGGACCCAATAAGTTTGGAGACCATATTGTGCTTAATTGGTGGTTTAGGTACCTTGGAGAAGCATTGCTATCTTGACTTATTCTCAGAAAAAGATGGTGCTAGTCACGAAGAAATTAGAGTCAAGACAGGACTCGGCTACTTCTACGCCATACCAATGCTTTTCCTGTAACAAGTATTTACTTCATGCATGTACAATATTAGAGTCAACACTGTGTAGGTTGCATCATGGCATGAACATAATACTTTTTCCACTTTGTAATTTCCTGCATGTTTGTCAATCACATTGATGAAATGCTTAGTGTTGGTGTTCTCTTAGCTCTTCATGGTCATATGAATGAGACAAATTTGTGCCATGACCCTTGTGTCATGTGCCTTGCTCTTATAAGAGGATAACTTGTGCATGATTCTATGCACTCATGCGTTTGACGTATGTTGGACCCACATTTATCGTAGTAATCGTATTAAAAGACTTACATCAGACCATGTCCAAAATATGTTAGTTGTGAGGTTCCTTTGGCTGCTACACATGCGAGAATACTTAGTATCACCTCATCATCAAAAATTCCAGAATCAGCCTCTGCCTCCTCCTATCTCTCAGTCGTCCGACGTGTCTCGGACGTCCGGCGGCTAATCTCATTCCGGACATCCGACCAGTGTCGGTCGTCCGATGGCAAAATCCTCCCCGGACGTCCGACGCCAGTCGGACGTCCGACTCATCGGGGCCTATAAATAGCTGGGCGCGGTGCTGGGCTTTGCCCTAGCCCCCACGCGCCCCCTTTTTCCCCTGCAGCCGCCGCCGCCAGCTCCACGAGCGCTCGCCCGCGCCGCCACTCCCGAGATCTGCCTGATCTCCTCCGCGGATCCTTCTCTTCTTCCTCCGCGGGATCCGTCTACAGGTATCTCCTCCGTTCCCCTCGCGTTTGGTTCCCTCTCTCCAAAGTCCACGTGTTCGTTCGTAAGGTTTGACCATGTCGTTCCTCATTTGGGGTTTCCATCCGTGTAGGTTGTTGTGCACCATGCCCAAGGTTAAGCACGCCGCCCGGAAGGACGTTGCTGGCTCATCCGCTCGTGCCCCTACTGGCACGGGGTCGGACTCGGAAGGGCAACGTCGTCCCTTCAAACAGACTGTTCGGCATCCTCCATCTCCACAGCTCCCCTCATCGTCTGATGGTGATGGCTCTGACTTCGAGGATGAGCTTGCCGCCGAGGACCTTGCTGACCAGCCCGCCGATCGGAGGTCCATGCCAAAGCCCGGGACTCGCAGGGCGTCCTATATGCCACCACCTCCTCCTGCTCAGCCCGCAGGTGAAGCTCGTCGCATCTCACTTGAACCCCCTGCTACCTTAGGTCGTGAAGACACGAACTTCACCACACTTGCCAAGTCTTCATACCTCACTTTCCGCCGCGACATTGATCAATTCTCTGTCGTACGTGACTCTACGGTCTCACGTTTCCGCACACACGTCCAGGCGGACATTTTTACTACAGTCATAGTTCCTAAGGGTCTCTCTGTTCATCACTTCATAGATCTTGAGCATATTCGCATGCACCCGGCAAAATACCCGGTGCCATTGAGCTTATTGAGGCATCGGGGCTTGCCGCCCCGTTTGCTTTTCATCGCGATTTTAACGCTGCTGCCATTCACCAGTTCTATGCCACATGCTTCTTTGCTCCAAACCACACTGTTAGCTGGATCACCTCTGACGTTCGCTTCACAACTTCTTATGATACGTTTGTTGCCGCACTTGGTTTCCCCAACTCCGGCTTCAAAATACATAGGAATGATCCTAACCATGCACCTAAGTCCATTGAGGCGTGTGGGTATCTCCTCAAACCACTCCATGAGCTTGATGCGGATGAACGCATGAAGGATCTTAACCAGGTATCCATCTGGCGTTCACCTTACTTTATCATCTTTCAATGTCTTATTCGTACCATATATCCCAAGATGGGTGATAAGGGCTCTTGCAGTGGGTATTGTATTGACATCATGTCACACTTGTACGAGCACCCCAAAAGAAAAATTAATGTGCCTCACTTTCTCTGGCATGAGATTCGGCTTGCTAGTTTTCAATACAAGCGAGCTTTTCCTCATGCCCCCTTCATCTAGGCACTAATTAATCATGTTGCTGATTTCTCTGTTGTTGTCACTCACACACATCGCATGTGGGTCATTCCCGCTCACATGGCGGATAACTATGCTCCCAAGAAAACCCCATCCACCACATCCACTCGCCGCACTGCTGCTCGGTCAGCAACCCCCTCATCTAGCTCCGCTCCTCTCGGTCGCTTTGCCAAATTCATTGGCAAGGCACATTCTGCTATGATGAAGGTCGTCTCTTTCCAGTGTGGTCAAACCCATGATGTGGTTTCTCTCCTAGTCTCCTCCAAGAATGCCCTCAAGGCTCGCCTAAGAGACTCGGGCGCTCTTGATGTGAGTGATGATGAGGCCCTTCCTGCTCCTCCTCCTTCTGACTTTGGCTTCCCATCTGGTCCTGAGTGGGCTGATTTTCTTGACGAGGCTGGTGGCAGTGGTTTGCCTGATGATGAGGATGATGATGTTGAGGATGATGCCTGATTAATGATGATATTGATGAGGGTGATCCTTGAGTATGTGATAGCATTGCCGGTTTTCCCTCCTTTTTGGTCCTTGATGCCAAAGGGCGAGAACATTATCTTATCTTAGTTTTCGATTTTAGTTCCTCTCACAATGTATGGTATGATGTATTATGTCGAACTTAATGATGTATCATCATGTAACGATACTTATGGATGGTGTGCTATGCCATCACCTATGGATGATGTATTGTTGAACTATCATGTGGTGATGAGATATCACGATATTATCGTTGTGTCATATGATGATGAGTTTTATGCTATCCTATTGATTCATATGATATGCTATGTATTGTTGAACTATTATGGTGTTATATCATGCTATTATCTTCAATGCACACATTAAGGGGGAGCTCTCGCACTTACCTATTTTACTATGCATATAATAAAGGGGAGCTTCATAAGCATCGTAACAAAACTCTCCTAAGCCACACATGTCTATTACTATTGTTGAGAGCTATATGTATGTTGTCATCAACTACCAAAAAGGGGGAGATAGAAAGTGCGGTCATGCCCTTAATCGTGTTTTGGTGTTGCTGACGACACACATATAGATAATTAATCACTAACCCTTTTTAAGCTATTGTGAATGATCATGTGTTGATAAGTACAAGCTCATGTGCTAACAAGGACAAGATCAAGATAAGCATTCCTGAGCACTACATGATTGATCCTTGTGGATGTTCACATGGTGGACAAATGAAGATAAATATATAAGCTAGGCTTTCCACATTGTGTATGGGAGAGCTACTTGAAGACTTCATCATGTCTTGCTTTCAACAATGAGCCAAGAAGGAACAACAACATCAAGCTCAAGTGAAAGGGATAACTCAAGGTATCAGTTACTTTGATGTTAGCGGTGCGGAGTGATGATCAGCGAATAAAAGTACACACTCAAGTATGGATCATCGGTATCCCTTTTACAATTCTTGAGTCTTTAGGGATCCCGCACTATTAAGAGGGGATCACAGGTTTTTGTGATGAACTTGCTCAAACTATATATCCACTATTCTGCTCAATACCACATATTCTCTACTCTGCTCCTATCTCAAAACAGGTCTAATGTCTCGGACTTCCGGCTCCCTCCGGACGTCCGAGGGTCGGTTAAGGGTCGGACGACCGATAGGCTTCGGAAATCCGGAGCCCTGCACCACAAGAACTTGAGCCCTATAACTCGGATTTCTGGCTCCCTCCGGACATCCGAGGGCCGGTCGACCGACCAGCTTCGGAAATCCGGAGCCCTGCACCAGAAGAACGTGAGCTCTATAACTCGGATTTCCGGCTCCCTCCGGACGTCCGAGGGCCGGACGTCCGACCCCTTCGGAAATCCGGAACCTTGCACCAGAAGAAGTTGAGTCGAATAACTCGGATTTCCGGCCTTCTCCGGACGTCTGGTCCCTGTTCAACTCACAGTGTTTCCAGACATAGCTACAGCTCTCGGACAACCGACCCCTGTCGGACGTCCGACCCCTTGCGGACGCCCGGACTTCTGTAAACTGCCGGACGTCCGAGCCTTATGTGACTTAAAGTGTCCCCAACGGCTGTTTTACACTCCCCACTATATATACCCCCCCCCCTCCCACTTCGTGAGAGGGTGTCCAACACACCCATATCCTCATAAGAACACATTTCTACCTCACACACATTTTCTCACACCAAATCTTAGATCCCAAGAGCATTTGTGAGCCCCTTTGAGAGTCCAATCAAAAGATAGATCGTTTCTCTCTCCTTCTCTCAACCCAAGCTATTTGAGATTTGAGCAAGTTTTGAGCATTCCCCGTGATCTTGTTACTCTTGGAGGTTGGAGACTCCTAGGCGGTAGGAGTTCTTCGGAGAGGAATCAATCCGTGTGATTACCCCCCGGAAAAGTTTGTGAGGGTTTGGAAGCCACCTCAAAGGCTTGCCACTAGTGGTTGAGAAACGCCTTCGTGGTGTTATATCAAAGGGGGAATAGGGTGAGCCTTCGTGGCGTTGGTGTGCCTTCGTGGTAACGTCCACCTCTCTAACGGTGACTAGCTTCCCTCCAAGGAAGTGAACATCGGGATACATCTTCGTCTCAGTGACCTTGGTTATCCTTAACCCTAACTCCTTACTTGTGGTTTACTTGTGTTACTTGAGCATACATACATTGCATATTGTTTGTGCTCATTATATTGTGTTGGCTATTTCATGTACAAGATTAATCATTCAAACATACCTTCTATATCCACACGTTCATACTTGCAGCTTTTGATATATCGTGTGATATAGTGTGATCTAGTATCTTGTGTTGTTCACCTACTTGTCGTGTGATATAGCTCAAGTAAGTTTGTGTAACTTACTTGTGCTTGTTAGTAACTGTATTGTGTCCATCTTGGTAGATCGTGTTGTTGATACACGTTGCAGTGCCTAGTGCATTTAGGATTTGTGCTTGACAAGTACCCTCTTAGTTTATTTCCGCATTAGTTTCAAGCCAAATCTGAAGAAGTTTTTAAATAGCCTATTCACCCCCCCCCCCTCTAGGCGTCATCGAGGTCTTTTCAGAGGATCATATGCTTCTACTTATTGCAATAGTATCAAGCTTCCTCTCCATATGTTGAAATTTTTTAAGCTATGCTTGTTTTGCCTTCCTATGCTAGTTGATTCTTGCTCCAATAAATTGTTTGATCACAAAATCCCTATGCATAGGAAGTGGGTTAGACTCAAATGTGCTAGCCATTTTCTCCATGATGCTCTCGTTGTGTTTCAATCCTTACCTTTTATGTGAGCATCATTGAAATCAATGCCTAGCTAAGGGCGTTAAACGATAGCGCTTGTTGGGAGGCAACCCAATGAATAAATTTTTCTTTGATTTTTGCTTCCTGTCTTGTTTTCTCCACACTTTCATAATTCTGTTATGATTGTGTTTTTTGTGTTTCTTTTTGCGTTTGTGCCAAGCAAAACCGTTATGATTAGTCTTGGGGA
>HvleckRLK81
CCGAGCGAGCCAGCGACCGCCGACCGGTATGGCCAGCTTTTCGAGCGCCACCACATCCACCTGTTTTCTCCTCCTCCACCTCGTCATCATCTTCTTCCACCTTCCAACTCCTGCCGTCTCCTTGGCGTTCAACTGCTCCAGGTTCACCACAGAAGACCTAAAGGACATGAAGTTCGAAGGCGACGCATCCTTCAACACATTGTATGGAAGTATCCCCATGAACACGAATACGTACCGTGTTGCCAGCCGGGTGTCGTACAGCGCTGCACCGCTGCAGCTCTGGGACAAGATGACCGGCGAGGTGGCCAGCTTCACCACGCAGTTCCAGTTCCAGATCCATATCACCGGTGACGAGAGCAGCAAGGGGGGCATGGCCTTTTTCCTCGCCGGCTATCCGTCTAGCCTGCCTGGCAATTGCACCCCCGACAGCCTCGGCCTCACTAACCAAAGCGCAGACGCCGTGCCGTCCGGTGATAGCCGGTTCGTGTCGGTGAAGTTCGACAACTTCAACAACACAATAGTAGCTGACCCCGACACCAGCAGCTACGACCACATCGGCATCAATGTCAACTCCCTCATATCGGTGAGTACACAGCCCCTGCCGAGCTTCACCCTCAACAACACCCAGACCGCCCAAATCGAGTACGACAATGTTTCCAGCATCTTAGCTGTGACATTATGGAGCGATGATGCAGATGGCCAAGACCAACGGAGTTCCAGCCTTAGCTCCAAGGTTGACTTCAAGAGCGTACTACCGGAGCAGGTCTCCATTGGCTTCTCCACGAACACGTTGTCGGGGATGGATATATTTCTAAACTCTTGGTACTTCAACTCTTCATTGGAACCACAACAAACACCACCACCACCACCATCATCACCACCACAATCCCCACCAGGGCTAGGTTCTGGAGTTATAGTCGGAGCAGCTGCCGGCGCAACAATGTTCCTCGTCCTCCTCTTTGCCGCTGCAGCGGCACTTGTAGTGCGCCGCCGTCGTCATCAGAATATGATGGAGACGGAGGAGTACTACACAGACTCAGAAGGCGAAGGCGAGCCGATGTCGGAGATCGAGATGGGGACGGGGCCAAGGCGGTTCCCATACCGCGAGCTCATGGAAGCAACGAAGAACTTCGCCGCAGAGGAGAAGCTTGGGCAAGGCGGCTTTGGCGCCGTATACCAAGGCTATTTGAGAGACCCGGCTGGGCTAGCCGTGGCCATCAAAAGGTTGCAGTCTTCCATACAAGGAAAGAAGGAGTACAAATCCGAGGTCAAGGTGATAAGCAGGCTGCGTCATCGGAACCTCGTGCAGCTCATCGGCTGGTGCCATGGCCATGATCAGGAGCTCCTGCTGGTCTACGAGCTCATGCCCAACCGCAGCCTCGACATCCATCTCCACAGCAAGCAGGGCACCTTCCTCACATGGCCAATGAGGTACGTACTTACCATCCATCTTGATAATAAGTTGTATGTGCTGCGGCGGTGCGATCATAGAATTATATATATGCATTGTATGTATATGTTGATGGTTGCAAGTGCAACTGCAGGATGAAGATATTGTTGGAGCTTGGGTCTGCACTGCTCTACCTCCATGAAGAGTGGGAGCAGTGCGTGTTGCACCGGGATATCAAGCCCAGCAACGTGATGCTCGACGAGTCCTTTGGAGCCAAGCTAGGCGACTTTGGGCTCGCGAGGCTCGTTGACCACGCCGCCGGGATGCAGACCATGACCGCAATCTCTGGAACTCCAGGCTACTTGGACCCTGAGTGCGTGAACACCGGCAGGGCCAGCGCCGAGTCCGACGTGTACAGCTTCGGCGTGGTTCTACTGGAGGTGGCATGCGGCAGGAGGCCAATGAGCGTAATCGCACCCAACCAACACCAGCAGAAGAACGGCGGCGTCTTCCGGCTGGTCGAGTGGGCCTGGGGACTCTACGGCCGGGGAGCCATCCTTGAGGCCATCGACGAGCGGCTGAACGGTGACTACGACGCTGCGGAGGTGGAGAGGGTGATGGTCATCGGGCTCTGGTGCGCGCATCCAAACCCGAGCGCGCGGCCGTCCATCAGGACAGCCATGGCCACTCTCCAGCCCAAGGTCGACCAAGCCTACCAACTGCCGATGCTTCCTTCCAAGATGCCGGTGCCGGTGTTTGAGCCGTTCGCCTTGGCCAATGCCGTTGGGATGTCATCGTCGTCCTCCCACACCTTTGGGGTGTCGTCGTCGACGTGGTCCAGTATGCCACCGCACACCTCTGGTACCGCATCCTCCGACGCTAGCACTTCAACAAACAGTTCAAAGACCTCTTCTTCGCTACTCAAACATTAGTGCCAGTAGCAAATTTATGGGGTGCGTTTGATATGTTCTCGGAGTGTTGTTGTAATAATGCCAGGATGGGACTAGCAGCTGGAATGGTTATCGGTCTGTTCATGTGTTTGATATCCATAAGAATGGTTGGGTTTTTTAGTTGGCTTACCAAGCTTATCATAACCCTCCCCTTTTTACGGTGTTGGGACCGGCTATGTTTATAGAAAAACAGAGGCAGAGTTTGTGTTGCGATCAGTAATACACAATGAGTTGTGGCCGGATTGCGTTCGCCTCACACTGTAAACAACATCAAAGGAGCCCCATACAAATTGTACTTCAGGCTAACAGAGATTGCCAAGAAATG
>HvleckRLK82
TCCAGGCGTCCATTTGGCTCTATTTCCTCATTCTCAACAACCTTTGTGTTCCTCATCATGCCTATGGACAACAACGATGGGGTGAGTGCGCATGGGCTTGCCTTTGCGCTTTCATCCACGATGGACTTTGTGTTCGATGCCCTCCCGGGTCCTTACTTGGGCTTGACCAACATGGAAAGGAACGGCAATGGCACAAACCAATTCTTTGCTGTTGAGCTTGATACAATTAAGAATCCCCAATTTGCTGATATTGATGACAACCACATTGGTGTCGATGTAAACGGCATGGAGTCCATCTATTCCCACACGGCTGGTTACTACACCTCAAATGGTATGTTCTCTCCATTGAAGCTTGCTAGTGGTAAACCGATGCAAGTATGGGTGGACTATGATGAAATCTCACACACCATTAATGCCAGTTTGGCGCCTTACTTAGAGCTCAAGCCGCACCGTCCATTATTGTCAAGCAATGTTAATCTTACGTCTGTGTTGGCAAACAACTCATTCTATGCTGGGTTTTCATCTTCAACGGGACTCCTTAAGTCAAGGCATTACATTATTGGATGGAGTTTCAACACAACTGGGAAGGCTCATCCACTTAACTACGCATCCATGTCTCTAATTATAGAAGAAGTTAGACATACAACACAAAATCGTTCACGTATTCCCCGAGCCATTCTTGTACCAGTTGTCACTCTACCAGTGATGACCGCACTTGTTATTATTGTCATTTATGTTCTTAGGAGGAAGGCAAGGAAGAATTCCGAGTGGGAAATTGAGACCGGGCCACCATCTTTCACATATAAAGATCTAGCCACTGCAACAAGAGGTTTCAATAACATGATGCTACTAGGGGAAGGTGGATTTGGGAAGGTGTATAAAGGAGTGCTACCAACTTCAAAGCAAAATGTTGCAATCAAGAGGATTTCTCCAGAATCAAAGCAGGGGATGAAGGAGTTCATATCCGAGATTGTCACACTTGGTCATCTCCGACATCGCAACCTTGTCCAATTGCTTGGCTATTCTCGTCATGGAAATGAGCTCCTTCTAGTTTATGATTACATGCCAAATGGTAGTCTTGATAGATTTTTGCATGGTCAAGATAGGCAAGCATTGAACTGGGTTCATAGGTTTGACATTATAAAAGGCATCGCATCTGGTCTTTTCTACCTCCATGAGGATTGGGAGAAAGTTGTCATCCATCGAGACATCAAGTCAAGCAATGTCCTTATCGATAACGAAATGAACTCAAGGCTTGGTGATTTTGGCCTTGCAAGATTGCACAACCATGGAAATGGGACTGGCGGCCACATCACAAATTTGGCCGGCACCATGGGTTACATTGCTCCCGAGTTAGCTACGCTTGGGAGGGCAACCAAGGCGACCGATGTATTTGCATTTGGTGTGTTCATGTTGGAGGTTGCTTGCGGGAGGCATCCGATAGGAGTGAGTTATTCTGGTGAGCCGGTGCTGCTAGTAGATTGTGTGCACTATGCATGGCAACACAATTCAATCCTTACAACAGTAGACCCAAGGCTGGAAGATTATATCATGGACGAGGTAGATTTAGTTCTAAAGCTTGGCCTATTATGCTCTCATACAATACCTACTTGTAGGCCATCCATGCGCTTAGTTATGCAGTACCTTGGAGAGGGTGCACCACTTCCAGATTTGCCACCAATTTTGAGCCTTACAAGAAGAGATCAAGGTTTTGATCAACATATCATGTTATCCAGTTCTCCG
>HvleckRLK83
CGTACGTCCTCCACCATGGAGAGTGCGTTCAAGCTTGTCCGGCTCCTCTTCCTAGTTTGCCTTACTCTAGCAGCCAGCGCCGCCGGCGACGGCGACGACCAGCTCGTATACTCCGGTTTCACCGGCGCCAACCTCACCTTGGACGGCGCGGCAACGGTGACGTCGGACGGCCTCCTCGAGCTCACCAACGGAACGGACCAGCAGAAGGGCCACGCCTTCTACCCAACCCCGCTGCGCTTCGCCGGAGGGTCTCCCGGCGGCGGCGGCGTGCGGTCCTTCTCGGCCTCCTTCGTGTTCGCCATCCAGTCCGTCTACACGGACCTGAGCGCGCACGGCATGGCCTTCGTGGTGGCGTCGAGCAACAACTTCTCGTCGGCGCTGCCCGGCCAGCTCCTGGGCCTCACGGACGTCCAGAACAACGGCAACGGCAGCAACCACTTCTTCGCCGTGGAGCTCGACACCATCCAGAACAAGGAGTTCGGCGACCTCAACGCCAACCACGCCGGCGCCAACGTCAACGGCCTCCGGTCCCTGCAGTCCTACTACGCCGGCTACTACGACGACGGGGACGGTAGCTTCCGCAACCTGAGCCTGATCAGCCGCGAGGCCATGCAGGTGTGGGTGGACTACGATCACAGGATTGCGCAAATCACCGTCACCATGGCTCCCCTCAACGTGCGCAGGCCAGTAAGGCCGCTGTTCAGGGCGACATACAACCTCACGACGGCGGTGACAGACGTCGCGTACGTCGGTTTCTCCTCCGCGACCGGCACGATCAACGTGCGGCACTACGTGCTTGGCTGGAGCTTCGCCATGAACGGCCCTGCTCCGGCCATCGACATCGCGAGGCTGCCAAGGCTTCCGCGCATGGGACCGAAGCCACGGTCCAAGGTGCTGGACATAGTTCTGCCAATAGCATCCGGAGCCTTCGTCCTCGCCTTGGGCGCCATCGTTCTGCTGGTGCTACGGAGACGTTTCCGGTACGCGGAGCTGCGGGAAGACTGGGAGGTCGAGTTCGGTCCACGGCGGTTCTCCTACAAGGATCTGCACCGTGCGACGGAAGGTTTCAGCGACACGCAGCTGCTAGGAATCGGAGGATTCGGGAGGGTGTACAGCGGCATCCTTCCGGCGTCTAGAGTGGAGGTTGCTGTGAAGAAGGTCGCGCACGACTCGAAGCAGGGCATCAAGGAATTCATCTCGGAGGTGGTGAGCATAGGACGTCTCCAACACCGCAATCTCGCGCCATTGCTCGGCTACTGCCGACGCAGAGGTGAATTGTTTCTGGTGTACGAGCACATGCCGAATGGGAGCGTTGACAAGTACTTGCACGGTAGAGAAGGGAAACCCATTCTGAATTGGGCTCAGAGATGGCACATCGTCAAAGGCATTGCATCATGTCTGGTCTACCTTCACGAAGAGTGGGAGAAAGTGGTCGTCCACCGCGACATCAAAGCCAGTAACGTCCTCCTCGACAGCGACATGAACGGAAGGCTCGGCGACTTTGGCCTTGCAAGGTTGTACGACCACGACGCCGACCCGCAAACCACACATGTGGTGGGAACCATAGGATACCTCGCTCCTGAGCTTGGGCATACTAGCAAAGCAACACCTCTCACCGACGTGTTTGCTTTCGGGGTGTTTGTTCTTGAAGTTGCCTGTGGGCAGAGGCCCGTCAATCCAAACTTGGAGGATGGTCAGGTATTGTTGGTCGAATCGGTGCTCGAGCAATGGACCAAGGGGTCGCTCCTTGATGCCGTGGATAAGCAGCTTGGGGGCAACTACAACGCCAATGAGGCATGTGTGGCTCTAAAGCTAGGCTTGTTGTGCTCTCACCCGTTCGCAAATGCAAGGCCTACTATGCGCCAGGTGACGCAATACCTTGACGGGGACATGCCATTGCCGGAGATGTCGCCGACGGATTTAAGCTTCCAGATGATGACCATAATGCAGAATGAAGGATTTGATCAATTCATCATGACATATCCTTCATCAACAGCGAGTATTGACAGCACATCTGTCCTTACAGTTGGAAGGTGA
>HvleckRLK84
CTGTAAGTCAGTGTGTGGCGCCTAAGGGTCAGGCGCCACACATTACAATGTGTGACGCCTGAGGCTTAGGCGTCACACTGCCTGGGGGTGGGGCCCTCCCTGCCACGTGGTCGGGGGTGTGGCGCCTAACCTCTAGGCGTCACACAGTACAGTGTGACGCCTAGGTGTCGGACGCCACACAAATTAAAGGGTCAAGCCGGTGAATTATTTCCCCCGAAGAGTCAATCCGTGAGTTCTTTCGTCCCAGGGGTCATTTTTGTCAATTTTGCCTGGTTCTCCAGCACCGCATAAATTCCCCTCGTCTTCGTTTGCTAACCCGGCCCGTACGTCCTCCACCATGGAGAGTGCGTTCAAGCTTGTCCGGCTCCTCTTCCTAGTTTGCCTTACTCTAGCAGCCAGCGCCGCCGGCGACGGCGACGACCAGCTCGTATACTCCGGTTTCACCGGCGCCAACCTCACCTTGGACGGCGCGGCAACGGTGACGTCGGACGGCCTCCTCGAGCTCACCAACGGAACGGACCAGCAGAAGGGCCACGCCTTCTACCCAACCCCGCTGCGCTTCGCCGGAGGGTCTCCCGGCGGCGGCGGCGTGCGGTCCTTCTCGGCCTCCTTCGTGTTCGCCATCCAGTCCGTCTACACGGACCTGAGCGCGCACGGCATGGCCTTCGTGGTGGCGTCGAGCAACAACTTCTCGTCGGCGCTGCCCGGCCAGCTCCTGGGCCTCACGGACGTCCAGAACAACGGCAACGGCAGCAACCACTTCTTCGCCGTGGAGCTCGACACCATCCAGAACAAGGAGTTCGGCGACCTCAACGCCAACCACGCCGGCGCCAACGTCAACGGCCTCCGGTCCCTGCAGTCCTACTACGCCGGCTACTACGACGACGGGGACGGTAGCTTCCGCAACCTGAGCCTGATCAGCCGCGAGGCCATGCAGGTGTGGGTGGACTACGATCACAGGATTGCGCAAATCACCGTCACCATGGCTCCCCTCAACGTGCGCAGGCCAGTAAGGCCGCTGTTCAGGGCGACATACAACCTCACGACGGCGGTGACAGACGTCGCGTACGTCGGTTTCTCCTCCGCGACCGGCACGATCAACGTGCGGCACTACGTGCTTGGCTGGAGCTTCGCCATGAACGGCCCTGCTCCGGCCATCGACATCGCGAGGCTGCCAAGGCTTCCGCGCATGGGACCGAAGCCACGGTCCAAGGTGCTGGACATAGTTCTGCCAATAGCATCCGGAGCCTTCGTCCTCGCCTTGGGCGCCATCGTTCTGCTGGTGCTACGGAGACGTTTCCGGTACGCGGAGCTGCGGGAAGACTGGGAGGTCGAGTTCGGTCCACGGCGGTTCTCCTACAAGGATCTGCACCGTGCGACGGAAGGTTTCAGCGACACGCAGCTGCTAGGAATCGGAGGATTCGGGAGGGTGTACAGCGGCATCCTTCCGGCGTCTAGAGTGGAGGTTGCTGTGAAGAAGGTCGCGCACGACTCGAAGCAGGGCATCAAGGAATTCATCTCGGAGGTGGTGAGCATAGGACGTCTCCAACACCGCAATCTCGCGCCATTGCTCGGCTACTGCCGACGCAGAGGTGAATTGTTTCTGGTGTACGAGCACATGCCGAATGGGAGCGTTGACAAGTACTTGCACGGTAGAGAAGGGAAACCCATTCTGAATTGGGCTCAGAGATGGCACATCGTCAAAGGCATTGCATCATGTCTGGTCTACCTTCACGAAGAGTGGGAGAAAGTGGTCGTCCACCGCGACATCAAAGCCAGTAACGTCCTCCTCGACAGCGACATGAACGGAAGGCTCGGCGACTTTGGCCTTGCAAGGTTGTACGACCACGACGCCGACCCGCAAACCACACATGTGGTGGGAACCATAGGATACCTCGCTCCTGAGCTTGGGCATACTAGCAAAGCAACACCTCTCACCGACGTGTTTGCTTTCGGGGTGTTTGTTCTTGAAGTTGCCTGTGGGCAGAGGCCCGTCAATCCAAACTTGGAGGATGGTCAGGTATTGTTGGTCGAATCGGTGCTCGAGCAATGGACCAAGGGGTCGCTCCTTGATGCCGTGGATAAGCAGCTTGGGGGCAACTACAACGCCAATGAGGCATGTGTGGCTCTAAAGCTAGGCTTGTTGTGCTCTCACCCGTTCGCAAATGCAAGGCCTACTATGCGCCAGGTGACGCAATACCTTGACGGGGACATGCCATTGCCGGAGATGTCGCCGACGGATTTAAGCTTCCAGATGATGACCATAATGCAGAATGAAGGATTTGATCAATTCATCATGACATATCCTTCATCAACAGCGAGTATTGACAGCACATCTGTCCTTACAGTTGGAAGGTGAATTGCATGATCCGCACTGTGATATCTGAGTGAGCCATTGTGTCTTGTTAGTGCCTGGTTAATTCGAGCTTTGTCATCTTTTTTGCTTGCTACTTTTTGTATGACGTACTGGGTGTTTGATACTCTGAATTTAACAAATAGTGTTATGTGCATCTATTGATGCAGAGCAGAGCGGGGGGTAATACCCTCATTTTCTAAAAGCAAATAGACAATTATATACTTCACTGTACCAACATATGGTTACGATGAAGGCCATGTAGCAAAACTGCTAGCAAGTGTAATGATTGGACATACATAGAGTATATCTGTATATTATTTTACACTGTAAGCCAAGTATATTATTTTTATACTGCAAGGAAAAACGGGACATATATAGAGTACATCTGTAGGCAAAAATATGTATTTATTTTACACAATTATATGGACAACACATACAATTTACGCACTTGTGACTAATTTTGATATTGAATATTAGGCCCATTTCATTCCAAATAACTACCCCCTCCATTCACAAATATAAGTTGTATTGGATATTTTAATATGAACTATATACAGACTAAAATGAATGAGCAAACACACTAAAACATCTCTACGTACATCTGATTGAAAAAAACATCTTATATTTATGATCGGATGGAGTACCTTCGTTTTTTTTTTCTTGAAAGATCCAAGAGACACCTCCCTTCTATACACTGAGATAGGACTATGCACACTTTTCTGATAAAAGGGGATATATCAAGAAGATATCATTATATCTGTCCTCTGCACCAACACGATACCCAGAGTTAATCAAGTTACTAAGAATAAACACAACCAAAGTACTAGAACAAGGAAGCATGGCTCCAAAACTTCATGTCAATGCGAACGCAACACGCATCAATATGAAACAACACCAACACCGACATGGGCAACACACAAAGTTTCATGAATCGTAAGAATTTGCTTATATTAGGGCATCAACCCGCACTACTATAGATCGGTATACTACTAACCCTCATCACTAACTGGCCTCTGGCCACACGTCAGTGATGAGGGTCAACATTGACCGGGCACTAAATGCACGTCATTGATAGCTTTTTGGACAAGTCATCACTGACCCGCCAATTAAGGGACACCTCATCATTGCCATACCAATCTTAGTGTGTGTGTGTGTTGGGGGGGAGGGGGGGGGGTTAGGGGTGGTCACTGATGACATGTCATCGGTCAGAGATGAGGCTCGTCACTGACTCGTTGCTTAGGAGGGGGGTCACTAATGACACATCATCCCTGACCGACCAACCTTACTGACTGGTCATTGTTCATTCATATCACTTTAAGAATTTTTCCCAACCCACAACGACACAACGCGTAAAACAAGTTAACCTATCACTTCGAAGTCTCCTTCCCTAACATCCCACCCAATGTCTCCCTCTCTCTTCCTCTCATGGCGGCGGCTCCCATGCCCCCGTCATCGTCTTCCCATGCCCTCACTTATCTCCTCCGACGCCGCACTTCATCCTTCCTAGCTCCGGTTCACCTTCTCTACGACGATGGGTGCGGCTTGGTCTAAGCAATGGTGCCAACTAGGACAATGTCCATAGGATGGTGGTGCTCTAGATCCAACTAGAGGAGCACACATGTCAGAGTACAACAATGCCCTACACTGGGTACTCCTCTTCTCTCCCTTAATGTGCAGTAATCTGTTCTTCTGTTTTTGA
>HvleckRLK85
TTTCTGGCTTGATAGCTCTCCTCTCATCTCGGAGGGAGAATTGTAACCACGTACGTGTTGCCTGGTTGCCGTCTAGATCAGGGACTGACTTAGACAATTCCAGAAAGATGTTCAGACTTCAACGTCGATCCGGAGACAAATTTTCAATATCTAGGGAGAAAATTAAACCTGTTGGACCATTTTCTCTTCAATTGCACCTTAAATGGTGATGTATCTCTTGCTTGCTGGAGTAGTAGCAGTACATCGATCGCGAACATCATGGGCAGTTCTTTGCCACTGTCGGGGACACATAGTACTACTACAACTAGACACACCGCTAGTTGTTTATCAACAACAAAGTATTAGTAATCTTTTCCTTGCCAGAGCATGAGAGGCATGGCTCCGAGGGAGCACACCTTCTTCCTCCTACATGCCATCCCACTCCTCGTCCTTCTTCCCCTTGCTGCATCCACAACCAGCAACGACAGCTTCAACTTCCTGTACCAAGGCTTCTCCGGCGTCAACCTCACCCTCGACGGCAACGCTATGGTGACGCCGGACGGTCTCCTCGAGCTCACCAACGACACCATCAACCTCGGCCACGCCTTCTACCCGACCCCGCTGAGCCTGCGCGGGTCGCCCAACGGCACGGTGCGGTCCTTCTCCCTCAGCTTCGCGTTCGCCATCCTCTCCGTCCACGACGGCATAAGCGCCGACGGCATGGCCTTCTTCGTCGCCCCCACCAAGAACCTCTCCAACACGTGGGCGCAGTACATGGGCCTCCTCAACAGCGGCAACAACGGCAACGCGAGCAACCACATGTTCGCCGTCGAGCTCGACACCACCCAGAACGAGGAGTTCCAGGACATGGACAACAACCATGTCGGCATCGACATCAACAGCCTCGAATCCTTGCAGGCCCACCAAACCGGGTACTACGACGACGGGAGTGGATCCTTCAACAACCTGACCCTTATCAGTGGCAAGGCGATGCAGGTATGGGCTGACTATGATGGGGTGTCCACGCAGATCGACGTGTTCTTGGCTCCTCTCGGATTCGCCAAGCCGGTGAGGCCACTGCTTTCGTCTCCCTATAACCTTTCCACAGTTCTGAGAGAACCATCGTACATCGGTTTCGCCGCCACAACCGGCGCAATCAGCACGATCCACTGTGTTCTCGGGTGGAGCTTTGCCATCAATGGCCCAGCTCCAGCCATTGACATATCCAAGCTCCCAAAGCTGCCACGTCTTGGTCCTGAGCCTCGCTCCAAGGTCCTGGAGATCACCCTGCCTATAGCCACGGCCACATTCGTCCTTGTGGTGGGAACTGTCATCGTTCTGTTTCTTCGCAAAAGATTCAGGTACAGGGAGCTGCGGGAAGATTGGGAGGTCGATTTCGGGCCGCACCGGTTCTCCTTCAAGGACCTGTTCCATGCAACCCAAGGGTTCAAGGAAAAGAACCTGCTTGGTGTGGGCGGGTTCGGCAAGGTGTACAAAGGGACGCTCCCAAAGTCCAAACTGAAAGTAGCAGTCAAGAGAGTGTCGCATGAGTCAAGGCAAGGGATGAAGGAGTTCATCGCCGAGGTTGTCAGCATCGGCCGGCTCAGACACCGTAACCTTGTGCCCCTCCTTGGCTATTGCCGAAGAAAAGGTGAACTTCTTTTGGTTTACGACTACATGTCAAATGGAAGCCTCAATCAGTACCTGTACTGTGAAGATGGCAAGCCATCACTGAGTTGGGAGGAGAGGTTCCATATTATCAAGGGCGTCGCGTTCGGCTTGTTCTACCTTCATGAGGAGTGGGAGAAAGTTGTCCTACACCGAGACGTCAAGCCGAGCAACGTGCTGCTCGACAGTGACATGAATGCAAGGCTAGGTGACTTTGGTCTCTCAAGGTTGTACGACCATGGCACCGACCCACAAACCACACATATGGTTGGAACCATGGGATACCTGGCGCCGGAGTTCGTACGCACGGGCAAGGCGTCCGCTCTCACGGACGTGTTTGCATTCGGCATATTTCTCCTAGAGGTCACCTCTGGGCAGAGGCCTATCAAGCAGAACCCATTTGGCAACAAGCACACGTTGGTCGACTGGGTTATAGAGCGATGGCACAACGGATCGCTCATGGATACCGTGGATCAGAGGCTGCAGGGTCACTACGACGTCGATGATGCATCTTTGGTGCTGAAGCTAGGGCTTTTATGCTCGCACGCTTTTACTAGCGCAAGGCCGACAATGCGGCAAGTCATGCAGTACCTCGAAGGCGATACACCACTCCCAGAGCTAACACCAGCACATTTTAGCTTTACTATGCAGGTCTTGACGCAAAACAGAGGATTGGAATCAGCAAACTTGCAGTATCCTCAGTTATCGACGAGTTTTGCCACTTTTTCCGGCCTCTCGGGAGGAAGATAACATATGCATATACGGTGTTTAGTGTTATTGTGTCTTTTCAGATTTTTTTCTTGCGTATTTCATCTGGATAGATGCTATATTCTAATGTATTCCAACAGTAGCTAGGGAGTATGTTAAACATTTAATGTTACTCTCGATGTCTATGTTCAGCTTAATTTCTCATGGAATTAATCAATCAATCTTCTGTACGTTCTACATGGTTCCAATGTGAATTCATGTTACTTTTTACGAAGTTTTCGTTTTCGCTTGCTC
>HvleckRLK86
AAAGAGGCCAGGATGGCGAGTTGACCTGTTCTTGGAGCCCTTCTACACAAGATCGAGCACGCCACGCAATATATGGTTGGATAGGACCAAAGTACCTTGACAGTTGACACTGTGCACCGGCGCCGGGAGCGATGGCCGAGATCACGCCGGCGGCCACCTATGCTGTCCTGCTCGTCTTGTGCGCTTGCTGCTACCTGCCTCCTCCTACTGCTTCCCTCTTCTTCAACTACCCCACTTTCAGCTCCCAAGATCAGAAGGACTTCAGCATCGAAGGGGACGCCTCCTTCAGCGTCGGACGGATCGACGTCAGCGCCAACAAGTTCGCCGGCGGCATCGGCAACAGCGCGGGCCGGGTGTCCTACAACGCCCAGCCGATGCTGCTCTGGGACAAGGTCACCGGCGAGGTGGCCAGCTTCACCACGCGTTTCTCCTTCGCCATCGTCATCCCCGACATCAACAACAAGGGGAAAGGCATGGCCTTCTTCCTCGCCGGCTACCCGTCGGTCCTGCCGTACGATTCCTACGGCTTCGACCTCGGCCTCACCAACCAGAGCACCAACGCCACGGCGTCGGGCGACAGCCGGTTCGTCGCCGTCGAGTTCGACACCTTCAACGATACCCAGGTATCCGACCCCGACGCCACCTATGACCACCTCGGCATCGACGTCAACTCCGTTCGATCCGTGGTGACCAAGTCCCTGCCGAGCTTCAGCCTCATGGGGAACATGACGGCTCTCATAGAGTACGACAACGTCTCCAGCCTTCTGTCTCTGACGCTATGGCTGGACGACGGCCGAGGCCCGAAGCACAGCCTTAACTCCAAGTTTGACCTCAAGAGCGCATTGCCGGAGCAAGTCGCCGTGGGCTTCTCCGCCGGGACGTCGTCGTCCGTAGAGCTACATCAGCTAACTTCATGGTACTTCAACTCGTCCTTGGAACCCAAGGCGGTGACCGTCGCCCCACCGGTTGCGGTAGCACCACCGTCCCCTGGCAGTGGCAGCGGCAGCCACAGCTCGGGAGTTATAGCGGGAGCAAGCGCCGGCGCGACGCTGTTCCTGGTGCTCGTCATCGTCACAGCAGTAGTCTTGATACGTCGTCGTGGGAGCGGCAAGAAGAAGCGAGAGGTCGAGGAGGATGACATGGGCTCGGACGACGAAGACGGCGATCCGGCGGTGGAGATTGAGATGGGGAGCACGGGGCCGAGGCGATTTCCGTACCAGGAGCTGGTGGATGCAACGAGGAACTTCGCGGCAGAGGAGAAACTCGGGCAAGGCGGCTTTGGCGCGGTGTACCGAGGCAACCTGAAAGAGCCTCGCCTCGCCGTGGCCATAAAGCGGTTCTCCAAGGATTCGTCGATGCAGGGGAAGAGGGAGTACACGTCAGAGATCAATGTGATAAGCAAGCTGCGGCACCGTAACCTGGTGCAGCTCGTGGGCTGGTGCCACGGCAGCAACGAGCTCCTGCTCGTCTACGAGCTCATGCCTAACCGCAGCCTGGACATCCATCTCCACGGCAAGGGCACCTTCCTGACATGGCCGATGAGGTAAGTCGAAGAAGAGCTACTGATTGAAATTAACCAGCATGCATGAATCATTCATGTATCGAACTGTGTGGATGATTCTTGCTGCAACAACAACAGGATGAAGATAGTAACTGGGCTGGGCTCGGCACTCCTCTACCTCCACGAGGAGTGGGAGCAATGCGTCGTGCACCGCGACATCAAGCCGAGCAACGTGATGCTGGACGAGTCCTTCGGCGCCAAGCTAGGAGACTTCGGGCTGGCGAGGTTCATCGACCACGCCGTCGGGACACAGACGATGACCGCCGTGTCGGGGACGCCGGGCTACGTGGATCCACAGTCCATGATCACCGGCAGGGCCAGCGCCGAGTCCGACGTGTATAGCTTCGGCGTCCTTCTGCTGGAGGTCGCGTGCGGAAGGCGGCCGGTGAGTCTGCTGCATGATCCTGCCGAGAAGAACGGGCTGTTCCGGCTGGTCGAGTGGGTCTGGGACCGGTATGGCCGGGGAGCCCTTCTCGACGGGGCCGACGAGCGGCTCAACGGCGACTACGATGGGGCGGAGGTGGAGCGCGTGATGGTCGCCGGGCTCTGGTGCGCGCACCCGGACCCGAGCGCGCGGCCGTCCATGAGAGCAGCCATGGCCGTGCTCCAGTCCAAGGATGCCAACCAGCTGCCGGTGCTCCCCGCCAGTATGCCCGTGCCGACGTACGGGCCGCTGGTGTCTTTGCCGAGCGGGCTATCTTCGTTCAGTGTGACACAGTCGACGTCGACGTCGACAAGCGGCTACGGCACACACACGTCTACTTCCTCCGACGTGAGCACCATCGGTTCAAAGGATTCGTCCTCGTTACTGAAACATCAGTATTCATAATTTAGTATTTTATTAGTTCTTTACAGTCATGATTGAATGGGACAGCACATGTGCCGTTGAATTTTCTTCCCTGCTTTAATGTAATAGCTGAAGTTTTGTTTGGG
>HvleckRLK87
GGCCCCACCCCACGCACACTCCCTGTCCTCCAGACCTCCACCAAGGGCAAAGGCTCACCCAACCCACTCCATGGGGATCTCCGTCGCCGTCCCCTCCCTCCTCCTCCTCTCCGCCGCCCTCCTCCTGCCGCCGGCAGCTGCGGGATTCTCCTTCACCTACAACTTCACCGCCGTCTCGGACTCGGCCCCATCGGGCATCTCCTTCCAGGGCGACGCCTTCTTCAACAAGTTCATCCGCCTCACCCGCGACGAGCGCGTCGGGCCCCTCACCAGCAGCGCCGGCCGGGCCTTCTTCTCCCGCCCCATCCCACTCTTTGACCCTGTCTCCCGCCGCCCCGCCTCGTTCGCCTCCGCCTTCTCCTTCTCCATCTCCGCCCCCGAACCCTCCGCCGCCTCCGGCGACGGCCTCGCCTTCTTCCTCTCCCCGTTCCCCTCAGTCCTCCCCAACAGATCCGCTGGCGGCCTTCTCGGGCTCTTCAACTCCTCCGCCCGCAACGGGGGTCGCTCCCTCGTCGCCGTCGAATTCGACACCTACAGGAACGATTGGGATCCCAGCGACGACCACGTCGGCATCGACCTCGGGGGCATCGCCTCCGTGGCCACCGCCGACTGGCCGACCAGCATGAAGGACGGCCGCACGGCGCACGCGCGCGTCGCGTACGACGCTGAGGCCAAGAACCTCACCGTGGCCCTCTCCTACGGCGACGCTCCCCCCACGGACGTCCTTCTGTGGTACGCCGTCGATTTGAGGGAACACCTGCCTGACTCCGTGGCCGTTGGCTTCTCCGCCGCCACTGGCGAGGCCGCCGAGCTGCACAAGGTCCTGTACTGGGATTTCACCTCCAGCGTCGACAGCAAAGAGCAGACGGTGATGCTGTGGGTGATATTGGGATTGTGCGGATTCCTTGTTGTGCTGGTCGGTGCAGGGGTTGTTTGGTTCGTCAAGGAATGGAGGAAGACAGGGGAATGTGTGCCCTATGTCGACATCGACGATGCAATGGGGTACGACGAGCTAACTGACGAGTTCATCGTGCAGAGCGGGCCAAGACGGTTCCGTTATGCTGAATTGGTGGCGGCAACCAACAATTTCTCCGAGCAGAGGAAGCTCGGGCAGGGCGGGTTCGGTGCTGTTTACCGGGGGTTCTTGAAGGAGCTCCGTCAGGAGGTGGCCATCAAGAGGGTCTCCAAGGGGTCGACGCAGGGGCGCAAGGAGTACGCAGCCGAGGTACGCATCATCAGCCAGCTGCGCCACCGGCATTTGGTCCGGCTTGTCGGGTGGTGCCATGAACACCGTGGTGACTTCTTGCTCGTCTATGAGCTCATGCCCAATGGCAGCGTCGACCAGCACCTCTACGGCAAAGGCGTGCACCTCACCTGGCCGACACGGTATGACATTGCACTGGGCCTCGCGTCGGCATTGCTCTACCTCCACGAGGAGTGCCTTCAGTGCATCGTGCACCGCGACATCAAGCCGAGCAATGTGATGCTGGATGCCACCTTCAGTGCCAAGCTCGGCGACTTTGGCCTTGCCAAGCTAGTTGAGCATGGCAGCCAGCCCTACACCACCGTCCTGGCTGGCACGTTAGGCTACTTGGCGCCAGAGTGCCTGACGACAGGCAAGGCAAGCCGGGAATCGGACGTGTACAGCTTCGGCGTCGTGGCACTGGAGATTGCTTGCGGACGACAGCCATCGGAGCCCACGGCGGAGCCGAGCAAGGCAAGGCTGGTGCCGTGGGTGTGGGAGCTTTATGGGAAGAAAGCCCTTCTCGAAGCGGCGGACTGGAGGTTGAAGGGGGAGTTTGACGAGAAGCAGATGGAGCATCTGATGGTGGTCGGACTATGGTGCGCTCATCCGGACTACACGCATAGGCCAAGCATCAGGCAGGCCCTGAATGCCCTGAAATTTGAGGCGCCATTGCCTGTGCTAGCGCCGAAGATGCCGGTGCCGACGTTCTTCCCTTTGCCTGACTTGGCTGCTCTGGTATCATCAGTTGGAGGTGCGCAGAACCCAGGCGTTACTGAGTGCGAGTCATCAGGGGCTAATGCTGGCCAACGGTCTTCGGTGAGGGATAGACTTCTGGAGCCATGAATGTGGTGGATTTGTTGAAGCTGCTGTCGCGATGATTTTGTTTGTTTCGCATATTGTGCTGCAACATGGTTTCACATATTGTGCTGCAACATGGAGGCGTGATCGATTGTATATCTGTATCAGTTGAGCTTGGTTTTGTATAGCATGGAAATGAGTTGGGTTATATCGGTCAAAAAGACCTAACAAGAAGAAACATTTCGAGGCAGTTTTGAGATATTAGGTTGAGTCAGGTGATAAAGCTGCTAGATTGCTTTAACTCCAACGTCACTCGTGTGAGATTATAGCCGATACAAGCAAACTAGATGTTCCCATCCCAGTCTGTGTGTAGCACATCACATGCAACGGCAAACCAACAACAACGGGTCTGGAACACCGCTCAAACTTTCACATGATACAACCACGGAAACTTGTACAAATATAAGTTAGCTAACGACATTTTGCTCTGTCATATCTTCATATAGCCAAACGACACCATTGCAGCCAATTGAAAGTTAACCTGAGGGTCCCTACTTGCAGTGCGAAAAGAATTGGATGGTCTAACAACCACAATGACACCTTTCAACTACAAAATCTTAACACCTGTACAAACTAAAAGCACTAGGCCCCTACAGAAATGCTATTTGTTACCTCCCCGAGATATTTATCTATCACTGCCCCTATTACACCATTCCATGAGCAAAATTGTGTTCCATCTCAGGAGGTGATGCTAAACCATAAACAAATAATTCAAGTCATCCACTGTCAGTCGAGTCTGGCCGCCACCAGATTTATCTTCCCCAAAAGCAGAAGCAACCATCTCCCGCTTTTTCTCCTGAGACAAGATTATACATCTTAGTAGTGCATCCAAAAATTCATTGCCAAACAAAACACATCAATAAATAGTACCCTCACATCAAGGACATGCATCAATTGGAAGGGTTGGCATCACATAGGATTTAACCAAATGGGCAGGAACCCCCACCAGTAGGAACACAAAGCAAGAAAATTAATTATTATTAAGATAACCCTGTTTAAGTTCAAAAATTTACTGTATGGTGTTCAAGTTGCACCCTATTCGGTCCAGGTGAATTCTGGTACCTACTTATTGTTCAGGTTGATCTCAAGTGATCCCAGGAAAATGAAACTATTTATTTACAACATCACTCACTGCTCAAGGAGGGGGCGGGGAGCAGGCAAGCATCCTACACCTCTATACTTTTAAAAACTGGACTGGTGATAAAAAAAAGGTGAAGACACCCACTTGATAGTTCATAGTCCAGGGTGTTGATTTCACCCACGAATTCTCATTCGACTGAGACCAGTATATGAGAGAACCCGAGACATTGGTTACTACGGTCAGTTTGAGCACAGAGAAGGTATCGATATCCATACCAGTCTATGCATCCTATATATATATACTTTTAAAAACTGGACCGGTGATCAAAACGGTGAAGACACCCTACTCAATGATTCATAGTCCAGGGTGTTGGTGGTTCATCAGTTGACCCACCAATTTTCTCATTCGACTGAGACCAGTCTCTGAGAGAAACCGGGACATTAGTCCCCAAGGCCAGTATGAGCACATAGCAAGTATCTATATCCTGGCCAGTCTAAAGGCGGCTAGGCATACAAAATGAAGTGATCTTACGATGATGGCTTTAAATTTACCTGGAGCGCCAAAATACGATCTTCAACAGTATCTTTGACAGTTAACCTAGATACTGTAACTGGTCGTGTTTGGCCAATACGATGTGCTCTATCAACAGCTTGGTCCTCGGTGGTAGGATTCCACCAAAGATCGAGCATAAGCACATGGCAGGCAGCCACCATATTTAGACCAAGACTCGCAGCTTTGAGAGACATGATCATAACAGAAACCTGCCGATAGCAGAAGTCAACAATATTGGAGAACAGGCTGTGATACACTCAAGAAAGTTGCATGTAAAAAATATCATTGAACACAAACCTCTGGAACTGTTTTGAAATCATTTACGGCTTTCTCCCGAGCAGCAACAGACATTGTTCCATCAAGCCTCCGATAGGTCACATGAGAAGCTTGCAAATGAACCTCTAGCAAATCCAGCATTCTAGTCCATTGAGAGAAAACAATGGCCTTCTCTGTCGTTTTGGTGTCAGCATGTTCTGAACTCTTCCCATTGATATTTTCAGAGGCAAGCCCAATTGTTTTTTTGCTATCACTATGGGTGGGATCAACTTTAGGTAATGAGAGAATGATATCTAGGGCAGCCCTCACTTTAGAAGATGCATAAGATGAATCAATCCCAGTTTGATTTTCAGTCTGTACAATCTCTGTACAGGAATCATTAGACTGGAATTCACTTGTTGATTTGCACAAGGAGAATTCAAGGGTGCCTCGAGAGAATAATGAAGTTGCATTAAGTCGGACTCTGCAATTAGAGACTGGACATATGCTGTCATCGCCAGTAAGTTGCTCCAATATGCACTGGTTGCAAAAAACATGACCGCATGTAGTAACGACAGCGTCTTCTGGTGCATCCTGCACAATTAAAGTCGCTAAGATTCAGATATGAACTGACGGAGAATAGTAGGCATGACAAAGCTGGGGTCAAGAAACTGGAATGAAGTCAAGGGTTTTCTTTCCAGTTTTTGTTTCTTTTATCGAGTACCAATTTATGCTGACACGGTCTTAGGAAATTGCACTACCTTTCAATGTTTCCCTTTTGTGTGTCCACGAAAGCAAACCCATCCGAGTATTTAACGTTACTAGACACAAGTATTCAAATAAATTACAATAGACCACACTCAGCAGCATCGCAATAGCAAAATGAAATATTGTAGAACATGACAAAAGAGTAAAAGTAGATATTAGGGGGATATTTATAACTATAGGTGAGGAAGAGAAGAGACAAATACACTTACGTTGCAGAGAGCACATATAGCTGAACAAGATTGCAAACAAACCAGCAATTCATGTTTTCGTTCCATTGGAAGTTTATTCGCACTCTCCAATGAAGAGGTCCAGCTAGACTCATGACCTTTAACTAGGTGAGGGTGATCACATGCCTGTCTGAGCCGTAAAAGCATCAGCAGGATATTCACGTAGTTTTGCCTAACAGTACCAGCAGCTGCATAGACCTGCAGATAAATCGTCAGATTAGAGCAGGTGAGCAATTGACCATATAGGTAGGCTCGTCAAGTTTATGAATGGAACACATAAACAAGGAGCCATAATCAACTTCGCGCGAAGTAAACATGAAATGTGTGGTCAAACATGTCAGCATCTCATAAATGTTCATATGAACTGTTTAGTATCAAGGTTCTACAAAATCTTTTTTGTGTGTGACCTAGACTGTACTAATCCAATCCTGCAAGTAAAGTAACCTGTTTGCTGTCCAGGTATGCAATTGTAAGGTGATGTAATCTATATATTCCAAAAGGCATAGATGCAGATTAACAAAATATATAAGTAAGAATATAATCCTGGCTGATTTATTGTGGAGAAACAGCAAGACAAGATCAAAAATCAAAATATTGAAAGAATAAATAAAAAGAATGTATCAGAAAGTAGATGGTTAATTAACACCATGAACACACACCTTAAATTGTGCTCGTGATTCAGCTTCTAGGGTGTTATAAAATGCACGCTCCTCACTCGTGAAGTTCACAGCCTTGAGAGAAATGGTCTTCGGTGGTAGGGAAATGATTGGTTTTCCATCCAACATTGTCGCTACATTACCAGATAAATATAACTTTCATCACCAATTACAAAGTTCAAAAATTATGCGGGACCACAAATCAACTACTTTGGAACAGAAAGAATATTACACAGGAATAGCAGGATGCCATATCATAAGCACGCCAATGAAATTAAAAGCACAGCAGTAGCGATACGAACACAAAACGACAGAAAATTCAAATGTGGGAATGTTCTAAACAATAGGAACATGTATTTGATCTTTCAATCAATAATATAACATAAGTTCCTTGTATAAGACCTAGAATACCCTTTTTTAGAATACTAGCCATGGAAATAGCCAATAGAAGTTCTGAGTGGTACTCCCTCCGTTCCTAAATATAAATCTTTTTAGAGATTCCACTACGGACTACATACGGAGCAAAATGAGTGAATCTACACTCTAAAGTATGTCTATACATCCGTATGTAGTCCATAGTGAAATCTCTAAGAAGACTTATATTTAGGAATGGAGGGAGTACAGATTATGCTTAACATGCTAATTGATGATTTGATGCCATCCACTAAGATATTTTCATCAATAGTCTGAAGACACTAGCAACTCCAACTCTTCAACATGTTGTTTGGTGAAAGATTGATAAAAAAATATCATGATAACTAGCAACACTAGTAAATGTGTATGTGCAATGCACGTTGTCATTATGCAGGTATATTAATTGCACAAAGATATTAGGTACTTCCTGTCCCATAATACAAGACGTTTTTGCAAGCTAACATAGCTTGCAAAAACGTCTTTTGTGGGTCGGAGGGAGCAAGATATTATTTGCGTGTTACGTAAGATATTATTTGCATGTTAATTATGTGGTAGTGCTGACGGTGATATTTGGTATGATAGGTAAACATGTTGAATGCTCAGCATTGAAACAATCTAGGTCGTCGGATTAACCTAATTTGATGGCCGAGTTTAATTGGATCTGCCCCTTACGGGCTTTTTATATTGGTATAGACTAGCTTCACTATCATGATTATTTTGTGTTAACAACTATTTTCATAAATTCTAAAGCAAAAGTTGTCTCTGATTAAAATGTCAGGTGTAAACTGTAGTTTAAGTACAATCAGTAAGACATCTTGTTGGGAGACAACAAAAGAGGACTTCTTAGATATGCACAGGTTAAGAGATGGAAAACACAAAAAATAAGTTCAGTAAATGACCTTTAGTCCGACGTAGCATTACTGTCTTCAAAACAACTTGTAGCTTCTTGTAACCATTAATTGGGTGCCTGCTGATTGGCATTTTTATCATGGTGCAAAATTGCTTGTAATTACAATACGGTTCATATCGGAGAAATTTGAAATAGCTAAAGAGATCTTCAACAGCATTCTGTATTGGTGTCCCTGACAAGCACCACCTTCTTTTGGCTCTCAAATTCCAGCAAGCCCCAGCAACATTGGTTCGGTAATTTTTAATACTTTGCGCTTCATCAAGAATAACCCTGAACCATGCTACTCTCGCAAGAGGTTTCTCTGGTAAGTTACTCTTCTCTGTTGCGGCCTTTTTAGTTTTCTTAGAAGATGAAGCCTTCCTCTTTTTGCTGCCTGAAACAGGAGCACCATATCTGTCTGCCTTCCCTTTCTCTTCATCGTCACTATCAGGACTTGATTGCTTTGGTACCTCCATACTTACTATAGAATACGTAGTTAGCACAACATCATATTTAGTGAGCTCGTTAGGATCCTTCGTACGGTTGCTACCATGATATACTAGAAAGGACAAATTAGCTTTGCTGGTAACTTTGTTCCTCAGTTCTTCCGCCCACTGCCGTAGAACACTTGTCGGGCAAACAACCAGAGTCCCAGCAGCTGGCCTGGCCTTAATCTCTACAATATGATTCTCTGTCTTAACTGTAGTGCTTGTTGTCACTTCAGAACTACATGTCTGTGACCTCCTTTTCAAACAAAGATCAGTGGGGTCGTCGTCGTCATCGTCAAGAGATACAGCTTCGCATAGCTCTGGCTTAATGACAGTTGACCTTGGTAATGGTGCTCTTTCTGTCAATATCAGTGAAATAGTTGATATGGTTTTACCCAAGCCCTGAAAAGCATCAGATGACATCTAAGACACATTCACACACTTTGCTGAACAGAAGGGAGAAATTAACTAGTATACCTGATCATCTGCGAGAATTCCACCAGAGCAGTGTGAACCATTTTTCTCCTTTTGTACCATCCATGACAGAGCGATTTTCTGTCCGAATAAGATGAAATATAGTACTAATTACTCAGAAGTTGGTGACTATTTTCAGGGAATCACGTGACATTGACTGCAAGGTGTACCTGATGCCTCAGTAAAGGAACTGATAAAAGCCCATCAGGTGGATTAGTCTCAGACTTTGGCTGGGATATATCCTGGAAAATTTCCAATATGTTAAGCATACTGGAGCAGCACATAAGAACTAGGTGCGAGAAAAGAAAAACTAAATGACGTTGCTTTCAACGTCATCAGGTAAATTCAGTGCGCAATCACTAAGTTTTCACGGCAATAAAGTCAGACCAAGTGTTCTATAGAGTATGGTTATAGGATATCATAGGAAGTTGGGAGACATAATCACCAGCAGTTACCAAAACAAAAAGTAGTTTAGTAAGATCAAGAATCAGCATACGGGAACTTGCCCAAAAAATTTATAGTTACCAACATGTAAGATCAAGTGAACAAAGATTATCAGAGAATTTCCAAATACAGATACTAAACAAACTAAAAGTTCGTATTAAGTATACCAAACGTTGCTTACGAAAAACTGCAATTGGGAAATTTTGAGTAACCATTCACAATAAGGCCTCATTCGGTTCGGAGGATTTTCATACAAAAACATAGGAACAAGGATTCCAGAGGGAAATTTCCTATATATACATTAGGTTTATAGGAAAAGCGTAAAGGAATTCCAAGGAATACTTTTCATTTCCTGTGTTTTTGGAGGAAACTACACATCCACTCAAAGCTCATTTTGTGCGTAGGAACGAGGCAAGACAATTCCTTGGGATGACAAGTGTCATCCTATCAAATTCCTATAGTACTCCTAATTCCTACGTTTTAGTTTCCTCCAAACCAAATGAGCCCTGATCATTATTCGGCAAATGATTTTGTGATTCATGACAGCAGGTATAACCAAGTTAACAAGTGTGAAAAGGAGGAACACAGTACAGAGAGAGATATAACCTGCAACGCAAGTCGTAGAGTCACCCTTTCATCATGCGACTTATATGTCGTCCCGCCAAATCGAGGAACAAAAGGAATTGCAGACAAAGATTGTTGGAAGTTATTTACTTTTCCCTGGATTCCCTGGGGTGGCAATAAATGACCAGGAGCACGATGACTACTAAGGTTAAATAAATCAGAATCGCCATTGGCATTTGCACCGAAGCAACTTCTTGATAAATTACCCCGAGTAAAGGAGTTGCCACTTCTGTGAATATCGTATTGTTGTTCATGAAAAGATGGAGGCATTTGATCTGTCAGGCTCCTATACGGGTGTTGGTGGCTGATAGGAACTAAACTAGAGTTCAGCAACTGTTTTGTTGAGCCTCCTAAGTATTTATCAGCATCCTCTGTAGTAGAGTTTCTGCTTGAGGGTATTGGAGAAGAGTCGGTGCTAGACTCACTCTTTAAACCAACATATTCAGACTGGATCTGCTCACAGGATAATGACTCTGGGGAAGTCATGTAGCAACCTGATAAAGATGTATCATCACAATATTGATCAGAAGAGCCCGTCTGCATCGAACTGCTTTCACATATATTCTGCGGGATCTGATCCATCTCATATGACTGATTGTTATCCGGCAAATCATGCAGTGACATTTCACCAGCCATATCAAGATAACCATACTCTGCTTTAGGACATTCCCCAAACTCCCCCTGCAGATAATCTCCCTGTACAGTTAGGCAGCTGCTATTGCCATTGTTCATGCTTCCAGTTGCCTCACCAAAGTTCAGTTCAGTGTAAGAAACATCAGGGATGGCAGCATTATGGTCAAGAGAGAATGTGTTCATTGGTATGTATTGATTACCCTCCTGACCAGTGTTATCCAATATTGCTCCTGTATCCTCACTTTTAACTTCACTCAAACCAGATTGCTCTGGGAACTGATTACATGGCAAATCTGCAGTAGATATGAAATGAATATGATTTTCTTTAAACTCAGATGATGCAAGCTATATATTGCCAAAGAGAAATTTGACATACAAGTATTCGTTGGTGGCCCCATGCCCTCTAAGTGGCTCTCTGCTTTGACCTGTGCTTTGCCAAAGTACATTTGGTCACCAACATATGAACAATTTGAGAGAACTTCGTATGGAAATGCATTTGCTTCTTCAGCAGCATTTATATGGTTTAATGTGTCCCTTGGTAAAGGTTGGTTGTTATGGTTGGTAGTTCTACAGTTTCCAGATAAATCTGCGAAGAAATGGTCAAATAAATAGTGCATCATACGGAGTGCGAACCTTAAAGTGTCAGTTTAAAGCCATTTTCTGTTTCTCACCACTGCCAACCAAAGGCTTAGCATCGGAGTAATCAAAGGTTCCATCTCCTTGTTCCACCATTGCTTCCATCTGGTATTGCGACCAGAAACCTTCATCACCCAAAAATTCTGCTCATTGATAAAACAATAGCTTAACAATGATTTTGTTGAAGGAAAGCCTCTTGTAAAAACATATGATAAACTGAGAAGCTCAGCCTACCTTCATGGCTTCCAAATTCATTTGCAACACCTGTCGTGTCCATTGGCACCTCTAAGGAGCCTTGATTGGCCTGCATTTCATCCTCCAAAAATTCTGCTCATCGATAAAAACAATATAGCTGAAGAAGGAGTGTGTTGAAGGAAAGTTCTCGTAAAAACATATGATAAACTGAGAAAACCTCAGTCTACCTTCATGCCTTTCAAACCCATTTGCAAAACCTGTCATGTCCACTGGCACCTCTGAGGAACCTTGATTGGCCTGCATTTGAACAACAATGATGTTGTTTAATGGGGGGGGGGGGGGTTGAAATAAGACACATTCCAAAAAATATTAATGGCCCGATACAGCATGCCTGGATGTAGATGCACAATCTTGCAACTGCTGACCACAAACACCCATATGATGCTAGAAATACTAGATGGAACATTTTTACTTGATTTTTTTTGTTCAGGCTTGCTAGAAAAAAAGAGTGCTATGATTATCCAACAACAAACCATCGCATTACCAGTGGATGAAATCTGAAACCCTAGCATCCAACAGCTTAGTGTCACATTTTCACACAATCAAGTAGTTCGAGTAACAAGCTGAGCTCTGAAAAGTCACATGTTGATCCAAACCCAAACATACACTGGAGAAACACCTTTCACCACAACAACCAATGAATAATAGAAAGTTTAGTGTATTACACTGCACTGAGTCACTGACAGTAAGAATCCAAGATCCCCACCATCACCCCGCATAAAATTAAATCAAACTGATTCATCTCATTTATAATAGAGTTACAGCCAGCTTAGAATATCGAGTGTAACTCCTTTGCTCTATAAGCACACCCCAGAAGGTAAGACAGCAAATAGCTGAATGCCGGCAAAAAAAACTTGAACCTTCTCATACTCTAGAGATCATGAGTAACTAAGAATTGGGGGGCGATATACCAAACAATACGAGAAAAGGGAGGAAACAATGCAACTCCACCCAACCCTTATAATCCTCTTGCAATCATCAACGCCTTAACTAGTCAGCACTACTCCGAATATCTCATCATAGACTTGCTGCTTCCAACCAAGTTCTTGCCTCAGCACCCCAATCAACTCAGCTGACGTACTACCACAGGCGAGGCCAATGATCCAACACTTGGATCCAATGCACCAGGACCTAATCCTCTTCAAGTCAACTGCCTCCAGTGACAAAGACAGCACCATATGATCATTGCTCATGTGATTGGGCTCAAATATCAAAAGATGGATGTCATTTCCAAACAGTATTTAACAAGCACATATATAGACGGTATGACTTAATTGCATCACATGCAATAACTGAGCTTTTAGCATTCCATTTAGTAGGGGAAACAATAAAACAACTCCCCCAAACTGAAAAGTGGCACCAAATCCCTTGCTCAAGGCTTGATCACGCTTGGCTCACACACATCTCACTCGAAAAGGCCCAGAGTCTAAGCGACTAGGACACTACACATCGCGAATTGCGGATATGTAGAAGGAGCATGACATCCCAAACACTCGTACGCGTCCGCTCCGACGAAATCCAAAACCCTAGCCCGGGGGAAGGCCAACCCTGGCTGCCGAATTGGATCCGGGCGGTCCGAGCTAAGATGCGAATTAGGGCAAGGCCGGGGCGGCAAAAGCGACGCACGCACCTCGGGCCGCGGGTCCTCCGCCCCGTCGTCGGCGGGCTCGCTCTCGAGGAAGGCCATGAAGTCGCCGAGGGGCATGGAGAGGTTGTCCTCGGCGCCGCCGTAGCCCCCGTCGTCGAAATCCATCGCCGGTTCCTCCGCCATCATCCGCCCCGGCGCGATTCGATCATGCAATTCGCCGCGGGAGAGGGCCCCTGCTTTTTTCTCCGCCGGACGAGAGCCCTTT
>HvleckRLK88
GGGATTACCAGTTTTGGCGGACATGAAGGAGGTGCGCGTGGTGCATGAAGAGGCGGAGAAGAGGGAGACGACCGGGGAGGTCGTGAATCGGCCGATCAAGTCTGCTGCCGGTATCGACGAATTCCTTTTTCGGATCACACCGGGTATCGATCAACGCGGGAGTTGAGAGTCAGCCAGTCGTCGGTGTGATTGCACACTGTATTAGCTCCCATGTGCGCCCGTGCATAAAAATATACTCCGTAGAACCTTGTGCTTTCGCCCTGCTTATTAAAAAGATGCACCCACTGGTTGTCTTTTCTCAATCAAAAGAAAAGAAAAGAGGCCAGGATGGCGAGTTGACCTGTTCTTGGAGCCCTTCTACACAAGATCGAGCACGCCACGCAATATATGGTTGGATAGGACCAAAGTACCTTGACAGTTGACACTGTGCACCGGCGCCGGGAGCGATGGCCGAGATCACGCCGGCGGCCACCTATGCTGTCCTGCTCGTCTTGTGCGCTTGCTGCTACCTGCCTCCTCCTACTGCTTCCCTCTTCTTCAACTACCCCACTTTCAGCTCCCAAGATCAGAAGGACTTCAGCATCGAAGGGGACGCCTCCTTCAGCGTCGGACGGATCGACGTCAGCGCCAACAAGTTCGCCGGCGGCATCGGCAACAGCGCGGGCCGGGTGTCCTACAACGCCCAGCCGATGCTGCTCTGGGACAAGGTCACCGGCGAGGTGGCCAGCTTCACCACGCGTTTCTCCTTCGCCATCGTCATCCCCGACATCAACAACAAGGGGAAAGGCATGGCCTTCTTCCTCGCCGGCTACCCGTCGGTCCTGCCGTACGATTCCTACGGCTTCGACCTCGGCCTCACCAACCAGAGCACCAACGCCACGGCGTCGGGCGACAGCCGGTTCGTCGCCGTCGAGTTCGACACCTTCAACGATACCCAGGTATCCGACCCCGACGCCACCTATGACCACCTCGGCATCGACGTCAACTCCGTTCGATCCGTGGTGACCAAGTCCCTGCCGAGCTTCAGCCTCATGGGGAACATGACGGCTCTCATAGAGTACGACAACGTCTCCAGCCTTCTGTCTCTGACGCTATGGCTGGACGACGGCCGAGGCCCGAAGCACAGCCTTAACTCCAAGTTTGACCTCAAGAGCGCATTGCCGGAGCAAGTCGCCGTGGGCTTCTCCGCCGGGACGTCGTCGTCCGTAGAGCTACATCAGCTAACTTCATGGTACTTCAACTCGTCCTTGGAACCCAAGGCGGTGACCGTCGCCCCACCGGTTGCGGTAGCACCACCGTCCCCTGGCAGTGGCAGCGGCAGCCACAGCTCGGGAGTTATAGCGGGAGCAAGCGCCGGCGCGACGCTGTTCCTGGTGCTCGTCATCGTCACAGCAGTAGTCTTGATACGTCGTCGTGGGAGCGGCAAGAAGAAGCGAGAGGTCGAGGAGGATGACATGGGCTCGGACGACGAAGACGGCGATCCGGCGGTGGAGATTGAGATGGGGAGCACGGGGCCGAGGCGATTTCCGTACCAGGAGCTGGTGGATGCAACGAGGAACTTCGCGGCAGAGGAGAAACTCGGGCAAGGCGGCTTTGGCGCGGTGTACCGAGGCAACCTGAAAGAGCCTCGCCTCGCCGTGGCCATAAAGCGGTTCTCCAAGGATTCGTCGATGCAGGGGAAGAGGGAGTACACGTCAGAGATCAATGTGATAAGCAAGCTGCGGCACCGTAACCTGGTGCAGCTCGTGGGCTGGTGCCACGGCAGCAACGAGCTCCTGCTCGTCTACGAGCTCATGCCTAACCGCAGCCTGGACATCCATCTCCACGGCAAGGGCACCTTCCTGACATGGCCGATGAGGTAAGTCGAAGAAGAGCTACTGATTGAAATTAACCAGCATGCATGAATCATTCATGTATCGAACTGTGTGGATGATTCTTGCTGCAACAACAACAGGATGAAGATAGTAACTGGGCTGGGCTCGGCACTCCTCTACCTCCACGAGGAGTGGGAGCAATGCGTCGTGCACCGCGACATCAAGCCGAGCAACGTGATGCTGGACGAGTCCTTCGGCGCCAAGCTAGGAGACTTCGGGCTGGCGAGGTTCATCGACCACGCCGTCGGGACACAGACGATGACCGCCGTGTCGGGGACGCCGGGCTACGTGGATCCACAGTCCATGATCACCGGCAGGGCCAGCGCCGAGTCCGACGTGTATAGCTTCGGCGTCCTTCTGCTGGAGGTCGCGTGCGGAAGGCGGCCGGTGAGTCTGCTGCATGATCCTGCCGAGAAGAACGGGCTGTTCCGGCTGGTCGAGTGGGTCTGGGACCGGTATGGCCGGGGAGCCCTTCTCGACGGGGCCGACGAGCGGCTCAACGGCGACTACGATGGGGCGGAGGTGGAGCGCGTGATGGTCGCCGGGCTCTGGTGCGCGCACCCGGACCCGAGCGCGCGGCCGTCCATGAGAGCAGCCATGGCCGTGCTCCAGTCCAAGGATGCCAACCAGCTGCCGGTGCTCCCCGCCAGTATGCCCGTGCCGACGTACGGGCCGCTGGTGTCTTTGCCGAGCGGGCTATCTTCGTTCAGTGTGACACAGTCGACGTCGACGTCGACAAGCGGCTACGGCACACACACGTCTACTTCCTCCGACGTGAGCACCATCGGTTCAAAGGATTCGTCCTCGTTACTGAAACATCAGTATTCATAATTTAGTATTTTATTAGTTCTTTACAGTCATGATTGAATGGGACAGCACATGTGCCGTTGAATTTTCTTCCCTGCTTTAATGTAATAGCTGAAGTTTTGTTTGGGACATGTACAATGATTTGATTGATTCGATAGTTTTCTCTTATTTTAATCATTAC
>HvleckRLK89
ATTGCGCGTAGCACTTGAGGCAGGACCTTTCTTTCGTCCTCTTCACTTGCCATGCAGCTCACTCTGCCGAAAGCGCTAAGTCAAGCCCCAAGGATCGTGCTTTTACCGATTCCAAAGAGGATCGATGGCGACCAACCAATCAACGATGAAACCCAACGTACAAGAACCGAACTGAAGTGAACCAAACCAGAAATCGTTCTCGCTTCTGCACTGCACACCAGCGTTCCACTGAGAAAGTGAGTGAGAATTGAGAAACAGAGAATGGTGGCATCCGGTGCTGCTCTGTGCCTCTCCGTTGTCCTGCTCCTCGCCGTTGTCTGCTGCCGCTCCGACGTCGACTTCACCTACCAGGGATTCCAGCACGCGCCCAACCTGAGCCTGGACGGGTCGGCGTCGGTGCTGCGCGGCGGCGCGCTCCAGCTCACCAACGACAGCGAGCGCCTCGTCGGCCACGCCTTCTACGGCTTCCCCGTGGCCCTGGGCGCGCTCGATGACAGCCACAGCGGCCTGCTCACGGTCTCCTCCTTCAGCACGGCCTTCGTCTTCGACATCGTGACCGTCGGGACGGGCGGCGGCCACGGGCTGGCCTTCGTGGTGGCCCCGTCCAGGGCGCTCCCGGGCGCGTCGCCCGAGATCTACCTCGGCGTCCTCGGGCCGACCACCAACGGCAAGGCCTCGAACCACGTCTTCGCCGTCGAGTTCGACACGGTCACCGACCTGGAGATGAATGAGACCAACGGCAACCACGTCGGCGTCGACGTCAACAGCCTCGTCTCGAACGTGTCCGAGCAGGCCGCGTACTACACCGCCGAGGACAACAAGGTGCCTGTGAAGCTGGAGAGCGCGCAGCAGATCCAGGCGTGGATAGACTACGACGGCGGTACCAGCTTGCTCAACGTGACCGTCGCCCCGGTGTCCGTCACTGACCGGCCGCAGCGGCCGCTCATATCGACAAAGCTTGACCTCCGGTCGGTCTTCAAGGAGAACATGTACGTCGGCTTCTCTTCGGCGACCGGGAAGCTCGCGAGCTCGCACTACATCCTAGCATGGAGTTTCCGGACCAATGGGCTCGCCCAGCCCATTGATCTCCGGCGGCTGCCAAAGGTCCCAAGACAGACAACGCCGGCTCCCAAGGTCCTCATCATCAAATTCGCCGCCGTGGCTTGTGCAGGAACACTCACCTTCGTCGCCGCAGCGATGGTTACTGCGCTGTGGCTCCGGCGTAGGGCGGCGCTGGCCGACAAGCTGGAGGACTGGGAGCTCGAGCACCCCCAGAGGATTCCATACATCGAGCTCTACAAGGCGACCAAGGGGTTCAAGGAGAGCGGGCTTCTCGGGTCGGGTGGTTTCGGCCACGTGTACAAAGGTGTGCTCGGACGTCGTCGGTCCGGCGAGGAGGTGGCCATCAAGCGGATCTCCAGCGGCACCAAGCAAGGGATGAGGGAGTTCGTGGCGGAGGTCTCGAGCCTCGGGCGGATGCACCACCGTAACCTGGTGGAGCTGCGCGGGTGGTGCAAGCACGGCCAGGACCTGCTCCTCGTCTACGAGTTCATGCCCAACGGCAGCCTCGACGAGCACCTGTTCGGCGGGGTGAAGGTGCTCACGTGGGCACAGCGGTTCAGCGTCATCCGGGGCGTGGCGCGCGGCCTGCTCTACCTGCACGAGGAGTGGGAGCACGTGGTGGTGCACCGCGACGTGAAGGCCAACAACGTGCTGCTCGGCGCCGACATGGGCGCGCGGCTCGGCGACTTCGGCCTGGCGCGCCTCTACGAGCACGGCGCGACCGCGGGCACCACGCGCGTGGCCGGCACCCTGGGGTACATGGCCCCCGAGCTCACCGTCACCAGCCGCGCCACCACGGCAACCGACGTCTTCTCCTTCGGCGCGCTGCTGCTGGAGGTCGCGTGCGGGCGCCGGCCCGTCGAGCAAGGCGAGGAGGCGGACGTGATCTTGGTGCGGTGGGTCCGGGACTGCGGGCTAGAAGGCGACCTGCTTCGGGCCGTGGATCCGAGGCTGGACGGGTTGTACGACGCCGCGGAGGCGAAGCTGGTGCTGTGGCTGGGCATGGTGTGCAGCCAGGGCCGGCCTGAGGCGAGGCCCAGCATGAGGCAGGTCTGTCAGTTTCTCAACGGCGAGGAGGTGCTGCCGGAGGACGCGGTGCTCGTGTTCTCGGATCCCGACTCGTCCGTGTTGCTTGGGTCCGTGCTCTCCTCCATCACCTTCTCCTCCTCCTGTGGCACCATGTCGGTAGGCTCGCTGCAAGGCGGTCGGTGAGCTAGCCAATGCTAGAACCAGTACCCCCTCAGGCCTCGTTTGGTTAAAGGGATTGGGGAGGTTTTGAGAGGAAAATTTTCGGAAGGGCCAGAAACCCCACAGATACTCGGACGCCCATTTGATAGGAGGGGTTTGCTTAGCCCAATCCCCTCCGTTCCCCTTCAATCTCTTCCTATTCATGTGTTTCAAAACCCTTCTCGGAGGACTAGTGGAAGCAAAACCCCGGGGATTTGAGAGGATTGGGTGAAACAAAGGGATTCATCCAATCCGCTGAAATCCATCCCTCTCAAAACCTCCCCAATCCCTCTTAACTAAACGAGGCCTCAAGGTTAACTGACTGGTCTAGATGTCATGCGCATGCGCAATTCGCACGGGATGCGCATGCATTTGTTCTTTGTGTACGAGTAAGAGTAGAATGCATCGGAGGTCATAAACCTATATCGTGTGTGTTAGCTAGATCAGGTAAATATGAAATTAAGGAAAATATATAATCTTTTTGGGCATACAGTACAGACGATACGCTCATACATACAACATTTTGAGATTGAAGATGTCAGTACGCACGCCTTTGTAGTCATTGAGAACGTCTATTTTTACTGAGCCCATATCATCGGATGGCCTAAAATAAATTCAAGAAAATACGAACACTGATGTAAAGTCTAGCACTTGACCCTTATGGATTGAGGTGTCACTGTCCTTCTAACCATCCAATCACATGTTGATCGCAGAGAATGTACATATTTATTTGATATGTATGTATGTATGCATGTGACCATGGTTGATGCCACATAGACAATATTTTACAAAACCCTCTTAATTTCAGGTTATCTCCTTGTTGATATTATTGGGCCAAATCTATTACACATTGAGGACAAATCGAAGAGGCACACTGGGCCCATTCATACATGACAAGTGGTGAAAATTTAGTTGCTGGTGGAGAGTGAGTTAAATGAATAACAACAAGAACAACAACAATTTTCAACAAAAAACAACAAGAAAGTCTTTCAGTCTCAAACAAGGTGTTCTGACTAGAGTTGGAACCCAAAATAGCTTAAACCTAGTCATGGTTCTCACACATGGATAACTAACTTCCACGCACCCATGCGTATGGCTAGGCTAATATCACTTTTTTAGTTAGTGATGCTGATAGACAACAAAAAAAGTTTAATCTGTCTATGAGCGAATGCAAGGTTGATAACATTGTCATTTTCGTGGAAC
>HvleckRLK90
GTAGTAATATCGCGGCAATCGTTGACACAAAGGTGAAAGGTCTTGTCATCCAACTTCATTCGTCCCTTCCCTTCCCTCAAAAAAGAAAAAACTTCATTCGTCCCTGATATATACTATCGTGTATACATTGCTTGCATGCTCAAGACCCTACACGTAAGGTTCATGGCTAAGGTGATGAAGAGAGCCAAGTGCCCTCTCGTCCTCAGCTTCCCCTACCTGCTCCAGGTCATATGGTGGTGTTGCCTTCCCCAAGCCACCTCGCTTAGCTTCGACTACGACTTCTCCGTTCCCGGCGTGCTCGCCGGCGCCGACCTCAGGTACATGAACGACTCTGCCGCCCTCCAGGACCGGATCGAGCTGACCAACTACTCGAGGAGCTGGAGCACCGGCCGGGTGGCCTACGGGAAGGCCGTGCGTCTCTGGGACGAGAGCACTGGCAAGGTCGCGAGCTTCACCAGCAACTTCGCCTTTGCCATCACTCCCGCTACCAGCAACAGCGCGGCATGTACAAATTTCCTGCAATTTCTACTAGAGTACATGTCAGTCGTTTTTGTAATTATCAAGTAACGTTGCTTGCGGTTGCGGTGCAGAGAGGTGATGGCATGGCCTTTTTCTTGGGGCCTTACCCGCCGAGCATGCCGACGGACGCCCGCGGCGGCCACCTCGCGCTGATCAACAACCGCGACAACCCGGCAAACAAAGATTCCCCACGAACCGTCGCCGTGGAGTTCGACGCGTTCAAGAACGCCGGCTGGGACCCTGATGGCACCAACTGCCACATCGGCGTCAACGTCAACGACATTAGGTCGGCGGAGACCACCGCGCTGCCGGACGGGTTCTTCAACGGGATCATGTCGGCGTCGGTCAGGTACGACGCCCAAGCGGCCACGCTCTCGGCCACCCTGAGGTTGGATGATCCGCCGGGGCAGAGTCCATACACCGTCAGCGCCAACGTCGACCTGCGGAACGTCGGTCTGCCGCAGGAAGCAGCGGTGGGATTCTCGGCCTCCATTGGGGACCTCGTCGAGAAGCATCAGATTCTTTCTTGGTCATTCCAGTCCTCTATGACCGGTAAGTGGCATCCCTTGTGTGCTTATACCTATGTTCAACCTCTCTTTCCAAAAAAAGAAATAACATGCTTTTTTTGCGTTTAAACTAGAAAAATACTCCGTTATTATCCTCCGTTATTATCCGAAATCGGCATTCGTATGGAGAGAGACAGTGAAGACCAAAGAGGTCCAGGGTGTTAGAGCGTAATCTTGATTGATTAATGTCATGTGATAAATCTAGCTTGCTAGGTTAATTAGTTTTCTTGCATGCTAGTTATACCTATACACGGCGTGGAAAGCTACCTGAGTTTGAGTTCGCATAGGCCCTGTTTCTTTAAAAAGTTCTAGGATTTTTTTTAGTCCCAACTAAAAGGTCTCTAGTCTCTACCCGTTTCTTTCCAAAAACTAAACATGGACTAGAGGTCATTAAATGACATGCAAAAAGACCATGTTACCCCTAGTAATATACCAGAAGTTATTAAATGACATGCTAAAAGTAGGGGCATTGTTGGAAAAAGAGCCAAAAAAGTCCCAAAAAGTCCCTACCATAGGGACTTCTTTCTTTAGTCCCAACTACCCCCTTTTAGTCTCTAAAAATCCCTCCTATTTCTTTCACATGGGACTAAAATACATCAAAAAGTCCCTGGAAAAAAAACACCTCCATAGCTTTGTTAGGTTATGTGTAATTAATGTCGAGTCCGGTATGCACTCAAGTCCGGTTTGTTATGTGTGATTATGTTAGATTTGTATCAACTGGGAGAAAAGAATAATAAAGACAGAAAAGACGGGTTTTTCGTGTACATGATGTTTTCGTGTGATTTGATGTGATTGATGAGGACGAGTTCCAACACATGGGACGTCCTCCTCCACTTCGACTTCTTACCGGTCAATAGCATTCCACCCAACAACTTAATTTTCCATCAAAGCATTTAGAACTTTTACTCAACTGCTCACACCTTCTGGCTTGACAATATGTAGGTTCCATTTTTCCCGCAATAAAAACTCAAAGCTTCCTACTAGAACACATGCAACCTTCAGTTCAAAAACTCAAACTGTTTGACTAAAACACCTACAGCTTCCCCCTTTGTAGGACTTCTAAACAAGACCCCACCCTTGCGTTTGTTTTCTTCAAGTTTTATGATTTGAAGTCTGAAATATGATGAAAATGAACAGTTTTATAGAGAGGCGTAACATTAATCATGACGATATCGTCGCCGAATGAAAAATAATGATGTGCTTGGGAACTTATGGTTAATAATGATCCGTAAAGAAACATCACAATCATTATAAGGTTCACAACGTACATGCAAATTATGAACATGATGTTTGTATTGACAGATTCCAAGACAAAAGGCACAAGTCTGATAGCTGGGCTAGTATCCTCTGGTTTGCTCATATTGCTTGCCATAGCCGTATGGCTCGGCTACCGCCAATATGTGAAGAGGAAGGGCAAGAACATCCATGACAACATACCTGAAGATGCGGATGAGACCCCTCTTGATGACCAGGACATGGACAGCGAGTTGGAGAAAGGGACAGCACCACGGAGATTTAGTTACAGCGAGTTATGGCGGGCGACACGGGGATTCAGCGATGATGAGAAGCTCGGCGAGGGTGGGTTCGGGGCAGTGTACAGAGGTTTCTTGCATGACCGTGGGCTCCATGTTGCCATCAAGAGGGTGTCCAAGATGTCGAGTCAAGGAAGGAGGGAATATATCGCAGAAGTGACCACCATCGGCCGGCTGAGGCATCGCAACCTTGTTCAGCTCGTCGGATGGTGCCACAAAGCTGACGAGCTCCTACTCATCTACGAGCTCATGACCAACGGTAGCCTCGACGTTCATCTCTACAAATCCAGAGACATCCTAACATGGCCAATCAGGTACTACTTGCTAACATGGTCAATTCGCATTTTTTTTTAAATTTTCACCGTGGGGGTAGAGCGTTCAATCCCCACCTGAATATATATATTACTCAAAGTGGGCGTGAATTCACAGTGCCCTACGTACATGTGCATGCAGTTCATGCATGACTCAAGAGCAATGGAATTCACGTTTGGTTGGTATGAGTATGACACGTACGTACGTGCATGCAGGTACAAGATCACTCTTGGCATGGGGCATGCACTCATGTACCTGCACCAGGAGTGGGAGCAGTGCGTGGTGCATAGGGACATCAAGCCCAGCAACGTGATGCTCGACTCCTCCTTTGACGCCAGGTTGGGAGACTTCGGGCTGGCGCGCCTCGTCGACCACAGCCGCGGCGCGCACACGACGATGCTGGCCGGCACCAAGGGTTACATGGACCCTCAGTGCGCGGTGACCAGCAGGGCTAGCGCCGAGACCGACGTCTACAGCTTTGGGGTCGTCCTCCTCGAGATCGCCTGCGGCCGGAGGCCCGTCATCCAGGAGCTGGAGGACGAGAGCAGGATGGTGCTGGTCGAGTGGGTATGGGCTCTCTACGGGAGAGGCGCACTCCTCGACGCGGTGGACGCGCGGTTAGACGGCGAGTTCGATGCGCGTGAGATGGAGCGCACGCTGCTGGTGGGCCTCTGGTGCGTTCACCCGGACTACGGCTTCCGGCCGTCCATCCGGCAAGCCATGAGCGTGCTCCAGTTCGAGGCGCCCCTTCCAGAACTCCCCCCGGAGATGCCGGTGGCACTACTGTACGTGCTGCCGCACCCGCACGGACGCTACGGGTCGAGCTACACGTCGTCGTCAACAGCGACCAGCGCCAGCACCGGCCACCGCCGACAGCAGGAGTGCCATCCTGATGAGGCTGATAGCGTCGACAACGAATCAGACCCCCGGCAGGACCGAGCATGTTCAGTCCACGCCGCGCAACTCTCCTAGCATGTTTCTCATGTTTAGTCAAGGAGTTTTGGTACCAGGAGCGACAATATCAGGCGACAACATCTTTTACATGCTCCTCTGTTTCCAATCTAAAAAGTTATAATCAAATGTTTCAGAATAGTATTAAAAAAAGGAGCTATATATGAATGTCATTGTGAATGTTAGCAAGACATGTGGCCACGAACCCTAACAAAAAATAATCCACACAAACTGGAAACACGGAAGAGACAAATCAATATATGAATAGTACGTACCAGTTTTACACTATTCTTGTTTTGTCTTTTTCTCACTATTCGGG
>HvleckRLK91
AAGAAACAGCAGCAACATCGGCTGACCAGCCCCGCCTCCAATGCAATGCCTCTCATCTCAGCTGCCTTCCTCCTCCTCCTCCTCGCCACCCTCGCCGCCTCCCAAGAATTCACCTACACCGGCTTCGGCGCTGGTCGCAACGGCGGCGCCCCGAACCTCACTCTGAACGGCGTCACGGAGCTCCAGCCGGACGGCATCATGCGCCTCACCAACGACACCTCCCGGCTCAAGGGCCACGCCTTCTACCCGTCCCCGCTCCGCCTCCTCGGCCCGCCCGGCTCCGGCAAGAGTAACGCCACCGCGGCAGCGGCGTCTTTCTCCACGGCGTTCGCGTTCGCCGTCGTGCCCGAGTACCCCAGGCTCGGCGGCCACGGCTTCGCCTTCGTGGTCGCCCCCGACCCGCGCCTCCCGGGGGCGCTGCCCAGCCAGTACCTGGGTCTGGTCAGCGCCGACGACGACGGCAACGCCACCAACCACGTGTTCGCCGTCGAGTTCGACACGGTGCAGGACTTCGAGTTCGGCGACATCAACGACAACCACGTCGGCGTCGACCTCAACAGCCTCACCTCCAACGCGTCCGCGTCCGCGGCGCCCATCAACCTCAAGTCCGGAGACACCGTCCTCGCCTGGGTCGACTACGATGGGGACCGGAGGCTCCTCAACGTCACTATCGCCACCTTGGCGGCGCCCAAGAAGCCGGCGTCACCGCTCATATCCTTCCATGTCGACCTGTCCGTCGTCTTCCGGGAGCAGATGTATGTCGGCTTCTCGGCGTCCACGGGGCTCCTTGCGAGCTCGCACTACCTCATGGGGTGGAGCTTCAAGTTGGGCGGCGGCGCCGCGCCGCCGCTCGACCCGTCGTCCCTCCCAACGCTGCCGAGGCCCAAGCCAGCCAAGAAGAGCAGGACGTCCCTGATCCTCGCGTCGGTGTTCTCGGCGTTTGTGGCGCTCTTGGTGCTCGCCGGCGCGGGCGCCTACGTTGCGTATCGCATCAAGAACCGCGAGGTCATCGAGCCGTGGGAGCTCGACCACGGCCCGCACCGGTACAAGTACCCGGAGCTGAAGCGCGCCACGCGAGGGTTCCGCGACCGCGAGCTCCTCGGCTGCGGCGGCTTCGGCAAGGTGTACCGCGGCGTGCTCCCTGGCACGCCCCCCACCGCGGTCGCCGTGAAGCGCGTGTCCCACGATTCCCGGCAGGGCCTCCGGGAGTTCGTCGCCGAGATCGCGTCCATCGGCCGGCTCCGCCACCGCAACCTCGTGCAGCTCCAAGGCTGGTGCCGCCGCCGCGGCGACCTCCTCCTGGTCTACGACTTCATGCCCAACGGCAGCCTGGACATGCACCTCTTCGGCGACGGCCTCCGGGCGGCGCGGCTGACGTGGGGCGTCCGGTACAAGATCCTCCGGAACGTGGCGTCGGCGCTGCTGTACCTGCACGAGGAGTGGGAGCACGTGGTGCTCCACCGCGACGTGAAGGCAAGCAACGTGCTCCTCGACGGCGACATGGCGGGGCGGCTCGGCGACTTCGGGCTGGCCAAGCTGTACGAGCACGGCGCGAACCCGGCCACGACGCGGGTGGTGGGCACCCTGGGGTACCTGGCGCCGGAGCTGACGCGGACGGGGAAGGCCACGACGGCGGCAGATGTGTTTGCGTTCGGGGCACTGGTGCTGGAGGTGGTCGCCGGGCGGCGTCCCATCGAGCCGCGGGCGGCACCGGAGGAGCTCGTGCTGGTGGAGTGGGCGTGGGAGCGGTACGCGGCGGGGGAGGTGGAGAAGGTGGTGGATGCGAGGCTGGGCGGGTCGTTCGACGCCGAGGAGGCGGCCGTGGCGGTGAAACTGGGGCTGTGGTGCTCGCACCCGGTGCCGGTGGCGAGGCCGACGATGAGGGAGGTGGCGAGGTACCTGGACAGCGGGGACGCCACGGAGGTGCCGCCGCCGCCGCCACCGCCGCCGCCACCGCCACCGCCGGTGTGCTCCGGCGAGGTTGGGTACGACGACTTCGTGCACTCGTTCCCGTCGTCGTCGTTCGAGAGGGCGGCGGCTGCCGGTGGAGGGGACCCGCTGTCGCAGACATCGGTGGCCACGTTCCCCTTCTCGCCGCTGTCCATGCGGTCATCCCACGTCAGTGTATGACCCCCCACACCGTGAGCCATCCTCTGGTCAGTGGATCAACATGTGCAGTGCACTGGAACAAGTGTTGTCCGGGCCCTCTCTTATAATTTGAATTTTTAAATGATATAAATCTTTTTAAAGTTTCACTAAACGGAAATTGTTTTTGGAGGCCGAGCTCCATGAAGGCCTTTAAATTTTATAAAAAAATATATTTTAATAATACAAAAAAATATGAAAAAAATACATAGATATATGAAGGTACAATACATAAATGTGTAAATTTTCAGAACTAAATACGTTGAAACGAGGGCTATGTAAAAAGACAAATTTGAAGCTTTTTAACACATGATACTGTTCATCTTTCTAGACCATGAATTTTTTTTTTTTTTACAGATCGTATCTCAAAGTATTTTGATTTGAAATTTTACACACATGGATCACATAGTTGTTTAGTTGTATAATTTTTTTTATATTTTTTAGAACCAAAATTTTCGAATTTTGAATTTCTTAAAGCCTCCATGGCTGCCGGGAACCAAACGTCCATTCTCTTCACTAAAACACCATATACGAATGTATATGCAGGTTTAGATTTATTTATTT
>HvleckRLK92
TTATTGTTACCGGCCCCACGAAACCTACTTGCCGACCCTTAATGAGAGAGCAGTCCCGATCTACCGATCGATCACGTCTACATTTCTACGCCATCTCTCTGCAAATGTCCGTGTCAGTCAGCGCCTCGCGACCCGCGAGTGAGTGTGTATGCGCCAGGCTTGGAAACTTCGGACCCGGACCAACCGGGAAGAAGATGGATGGCACGTGCTTAACCACTTGATCTGATTCTAGACGCAGCACCAGCGTGATTCGCCGCAGCTGCGCCACGAGCTCGGGGAAGACTCCGGCAGCCAAGTCAAGCGCACAGAACAGTAGCCAGACACGGACCCGGCAGCTGCAAATCATCATATACGGCGGATCGGCANNNNNNNNNNNNNNNNNNNNNNNNNNNNCGGCATTCCGCCGGCTGCACTGGCTGAGAGCACCACACCAGTGGCATGGCCGGCATGGAGAGCCCGTGGCGCCCCCTTCTCGCGGCTCTCCTCCTAGTGTGTTTCGGCGCCGCCGTTCTGGGCGACGGAGATGGCGAGCAGTTCGTCTACTCCGGCTTCGCCGGCGCGAACGCCACCCTGGCCCTGGACGGCACGGCCGTCGTCCAGCCGAGCGGGCTCCTGGAGCTGACCAACGGCACGGCCCAGCTCACGGGCCACGCGGTTCACCGGATGCCGCTGCGCCTGCGGAGGTCGCCGGGCGACGGCGTGCGCTCCTTCTCGGCGTCCTTCGTGTTCGGCATCATTCCCCCGTACTCCGACCTCAGCGGTCACGGCATCGTCTTCTTCGTCGGGAAGGACAACTTCTCGGCCGCGCTGCCGAGCCAGCACCTGGGCCTCCTCAACAGCTTCAACAACGGCAACGCCACCAACCACATCTTCGGCGTCGAGCTGGACACCATCCTGAACAAGGAGTTCAACGACCCCAACGACAACCACGTCGGCATCGATGTCAACAGCCTCGAGTCCGTCGTAGCGCGCCCCGCCGCCTACTACGACGAGAAGAGCGGCGCGTTCCACGATCTGCTTCTGATCAGCGGCAAGGCGATGCAGGTCTGGGTGGACTACGAGAGCGAGTCCACGCAGATCAACGTGTTCCTGGCGCCCCTGAAGAATGGCGCCAAACCTTCGACGCCCCTGGTGTCAGCCAAGAGGAACCTCTCGGAGGTGCTCGTGGAGCCGGCGTACGCCGGCTTCTCGTCGTCGACGGGCACGGTCAGGTCGCGCCACTACCTTCTCGGCTGGAGCTTCGCCATGGACGGCCCCGCACCTCCCATCGACATAGGCAGCCTGCCGAAGCTGCCGTTCGTGGGCGTCAGGCCGCGGTCGAGGGTGCTGGAAATCGTCCTGCCGATCGCCACCGCGGCGTTCGTCCTCGGCGTGGTCGGCGTGGTGATCCTGCTCGTCCGGCGGCGGTCCAGGTACGCGGAGGTGCGGGAGGACTGGGAGGTGGAGTTCGGGCCGCACAGGTTCTCGTACAAGGACCTGTTCCGCGCCACGGAGGGGTTCAAGGGCAAGACCCTGCTGGGCTTCGGCGGCTTCGGGAGGGTGTACAAGGGGGTGCTCCCCAAGTCCAAGCTGGAGGTGGCGGTGAAGAAGGTGTCGCACGAGTCGAGGCAGGGCATCAAGGAGTTCGTGGCGGAGGTGGTGACCATCGGCCGGCTCCGGCACCGCAACCTAGTGCAGCTGCTCGGCTACTGCCGCCGGAAGGGGGAGCTCCTCCTGGTCTACGACTACATGTCCAACGGCAGCCTCGACAAGTACCTGTACGGCGGCAGCAAGGACAAGGAGAAGCCGGCGCTGGACTGGGCGCAGAGGTTCCGGATCATCAAGGGCGTGGCGTCGGGCCTGCTCTACATCCACGAGGACTTCGAGCAGGTCATCATCCACCGGGACATCAAGGCCAGCAACGTGCTCCTGGACGCCGACATGAACGGCCGGCTTGGCGACTTCGGCCTGGCGCGCCTGTACGACCACGGCGCCGACCCGCAGACGACACACGTGGTCGGCACCATGGGGTACCTGGCCCCGGAGCTGGCGCGCACGGGGAAGGCGTCCCCTCTCACCGACGTCTTCGCCTTCGGCGCCTTCATCCTGGAGGTGGCCTGCGGCCGGAGGCCCGTGGAGCAGGCCATGAACGACAGCCGCCTCATGCTCGTCGACTGGGTGCTCGAGCACTGGCAGAAGGAGACGCTCCTCGAGGTGGTCGACGCGAGGCTCGACGGCAACTACGACGCTGGCGAGGTCGTCCTGGCGCTCAAGCTGGGCTTGATGTGCTCGCATCCGATGCCCGGCGCGAGGCCGAGCATGCGGCAGGTCATGCAGTACCTCGAAGGCGACTTGCCGATCCCCGAATTGACGCCCACGCAGATGAGCTTCAGCATGCTGGCCCTGATGCAGAGCCAAGGGTTTGACTCGTTCGTCTTGTCTGCGGCGTCGGATCCATCGTCCGCCACGATGATGACCATGGGCACGATCACTGGACTCTCCGGAGGGAGATGACATGATAATTTTCAACGACTCGTGAGTTGTTGCGCCGTGCAGATGTTGATCGGGTGGTTGTCGCGAGCACTAGTATTGGCAATTTGGCAGAGCTAATTATTCCACCATAGTAGTAGTACCAAAAATGCTAGACCTAGCAAGTTTTAGTCTCATTACTTTTAGTCATGGGACTAAAACGTATCCAAACACCCTCTAAAGCCTACATAAGTTTACTAAACCTTCCAACTAATCTAAACATGCCCCCCTGATTTTCACGGGTGGGTGGGCCTCATCCTCCTCTTAATCCAATCAGTTATTGCCAAGTCAGACTATCACGTAAACGTACGTAAATATTTACGTAGATGTAGCATTGCTCGTAGTAGTACTCCTTGATATAGTTTCTCTATCTAAGATCTTCGTAGCATCCATGTACGTATAAGCTTTCCCGGCAAACAAAATATGTAATCTCCAACAGCCGTGCTACCAGCGGCGAGCTAAAATACAGTTTTCACCGCGACTGTTTTGACGCAGCGGTCAGCGCTGGCTCCAACAGCCGTGCTAAAATGCAGCGCTCGTACGTAGCTCTAGCAG
>HvleckRLK93
CTTGGTCCAATAGTTCGGCGGAAGCGAGCCGCACACGCACATTATCATATCATGAAGCTTACGGTGCTCTTCGTCGTGTTGTTTAGTTTTCACCTCGCAGCCGGCGACGACGTCCAGGTCCAGTTTGCCTTCCCAGGCTTCGCCGGCGCCAACCTCACCGTCGACGGCAACGCCACGGTCACCCCCGACGGCCTCGTGGTGCTTAACAGCCGCAAGACCAACCTCAAAGGCCACGCGTTCTACCCCACCCCGCTGCGCTTCCGCGGGTCGCCGGGCGGGCAGGTGCACTCCTTCGCCTCCTCCTTCGTTTTCGCCATCGTCTCCGACTACACCGACTTCAGCGCCCACGGCATGGCCTTGGTCGTGTGCCCCACCCCGGAGAGCCTCTCCTCCGCGCTGCCTGCCGGCTACCTGGCCCTCCTCAACGTCCAGAACAACGGCAACGCAAGCAACCACCTCTTCGCGGTGGAGCTCGACACCACCCAGAACACCGACTTCAAGGACATCAACTCCAACCACGTCGGCATCGACGTCAACGATCTGCACTCCCTGCAGTCCCACCCTACGGGCTACTACCTCGACGGCAGCGGCGACTTCAGGAACCTGACTCTCTTCAGCAGGGAGGCGATGCAGGTGTGGGTGAGCTACGACGGCGGGACCGGGCAGATCGACGTGACACTGGCGCCCCTCGGAGTGGCCAAACCGGCGAGGCCGCTGGTATCAGATACCTACAACCTCTCCTCGGTGATCACGGAGCAGGCCTACATCGGCTTCTCGTCGTCGACGGGCGGGATCAACACGCGGCACTACGTGCTCGGCTGGAGCTTCGCCATGAACGGCCCTGCCCCGGCCATCGACATCGCCAAGCTACCCAAGCTGCCGCGCTTTGGACCCAAGCCTCGCTCCAAGGTCCTGGAGATCGTTCTGCCCATAGCCACGGCGGCGGTCGTCCTTGCTGTCTGCACGGTTGTCGCTCTACTCCTGCTGAGACATCTGAGGTACGCACAGCTGCTGGAAGACTGGGAGATCGAATTCGGGCCGCATCGATTCTCGTACAAGGAATTGTACCACGCCACCAAAGGATTCAAGAGCAAGCATCTACTTGGTGCCGGGGGTTTCGGAAAAGTCTACAAAGGTGTGCTCAGCAGGTCCAAGTTGGAGGTAGCCATAAAGAAGATCTCCCACGAGTCAAGGCAAGGGACGAGGGAGTTCATCGCCGAGGTGGTGAGCATCGGGCGGCTCCGGAACCCCAACCTCGTGCAGTTACTCGGCTACTGCAGGAGGAAAGGGGAGCTGCTTCTGGTGTACGAGTACATGCCAAATGGTAGCCTCGACAAGTACCTCTACGGCGAGTGTGAAGGGGTGCTTGACTGGGCCAAAAGGTTCCATGCCATCAAAGGGGTTGCCTCCGGCTTGCTCTACATCCACGAGAGGTGGGAGAAGGTGGTGATCCACCGAGACATCAAGGCCAGCAACGTGCTCCTCGACGGCGAGATGAACGGGCGCTTGGGGGACTTCGGGCTCGCAAGGCTGTACGACCACGGCACGGATCCGCATACCACGCATGTGGTCGGCACCATGGGCTACCTAGCCCCGGAGCTCGTGCGCACGGGGAAGGCGTCGACGCTCACGGACGTGTTCGCGTTCGGCGCCTTCCTTCTCGAGATTACCTGTGGGCGAAGGCCGGTGAGCAATGGTTCCCCGGGCATGGACACTGACAGCCACGAGATGCTAGTGGACTGGGTCCTTGATCATTTCCGCAGAGGATGTCTCGCCGAAACGGTGGACGCGAGGCTGGGAGGTGACTGTGATGTGGACGAGGCATGTCGGGTGTTGAAGCTCGGGCTGTTGTGCTCGCACCCGTTCGCCAGCACGAGGCCAAGCATGAGGCAGGTCATGCACTACCTTGACTCTGACACGCCGCTTCCGGACCTGTCATTGGCAGATATGACGAGCTTCAGTACGATGGCCCTGTTGCAGAACCAAGGGTTCGACTCGTATGCCATCTCTTATCCATCTTCAATGGGGAGCATTGGCACTGTATCTTACATCTCAGGTGGAAGATGACATCCATGTACGTACGACTAGTGTTTATTTATTATGCCATTGCTAGCAGATGCTTTCCGCTCTGTTCCAAAATAGTATAAAGATGTTGGAGTATTTTCTTTTTCAAAGTCAATTTATTCAATCTTTGACCAGGTGTATATAGGAAGAAAATATCAAATTTTACTATAGCACTAGATATAATTAAATAACATGTGAAAATATATTTCATGATGAATCTAACAATGCTGATTTGTTATCGTAAATGCTGGTATTTTTCCACTTGATCAAACATAGAGACTTTTTTGCTTTTAAAAAAACTAATGCAACTTATGTTTTGAAACGGAGGAAGTATATTTGCAACACAACCCCATATATCATTCAAACCATAGTGGAAAACACCAGGGGTGGGTTTCTAAATATTACTTGTCGAGTCTTTTCCCTTTTCCTTGCGCTTGTG
>HvleckRLK94
AGTGTACCACCGGAGAACTTGTGGCACGTAGAAGTGGACAGGGTGCATTACAAATAATCGTAAAGATATGACAGTGACCCTACGACTGCCATGGACAAAAGGTCGTAATGACATGATAAGGCCGGGCAGGAAATTTCTCCGCTACGTCTTGCGACAGCAATGAAAAGTTGTTTTTCAGATCCGGTAGTGCAAGAGTGTTGCTACTGCTAAACTCTTACTATGCTTGAATTTAGCACAACTTAAGTCCGCATATTTTCAGCTCTGTTGATTTGTCACCAACCGTGGGTACCGTAGCATGAAGCAGATACGTCTCCTCCTCCTACACCTCCTCTACGTTGGCCTGAGCCTCGCCGATGGAGATGACCAATTCGTGTACTCGGGCTTCGGCGGCACGAACCTCACGCTGGACGGCGTGGGGGTCACGGCGGACGGCATGCTGGAGCTGACAAACGGCACGCTCCAGCGCAAAGGCCACGCCTTCTACCCCGCGCCGCTGCGCTTCCGCAATGGCACGACGTCGACGTTCCGGTCCTTCTCCGCCTCCTTCGTCTTCGGCATCCTGTCCGACCACGTGGGCCTGAGCGCCCACGGCATGGCGTTCGTCGTCGCCGCCGGCCTCAACTTCTCTGACGCGCTGCCCAGCGGCTACCTGGGCCTCCTCAACGTCCAGAGCAACGGCAACGCGAGCAACCGCCTGGTCGCCGTCGAGCTGGACACCATGCAGAACGACGAGTTCGGTGACATCAACGACAACCACGTCGGCATCGACGTCAACAGCCTCAGCTCGGTGCAGTCCTACTACGCCGGCTACTACGACGACGGCAGCGTGAACGGCGACTTCCGAAACCTGACCTTGATCAGCGGCGAGGCCATGCAGGTGTTGGTGGAGTACGACGGGGAGGCCACCCAGATGAACGTGACCGTGGCTCCGCTCAACGTGGCCAAGCCTACGCGGCCACTCGTCTCGGCCAGGCACGACCTCTCCAAGGTGCTCACTGACGTGGCATACGTCGGCTTCTCCGCCGCCACCGGCGGCACGCTCCGATCGCGGCACTATGTGCTCGGATGGAGCTTCGGTCTGAACCGCCCGGCTCCGGCCATCGACATCAGCAAGCTACCAAGGCTTCCCCGTGTTGGTTCAAACGACAGGTCCAGAGCCCTCACGATCGCCCTCCCAATAGCAACGGCGACCTTCCTCCTCGCCGGTGCCGCGGCCATTTTCGTGCTCGTGCGAAGGCACCGGAGGTACGCCGAGCTGCTGGAAGAATGGGAGGTGGAGTTCGGGCCACACCGGTTCTCATACAAGGATCTGTTCCGCGCCACGGAAGGATTCAAGAGCGATCACCTGCTGGGCATAGGCGGGTTTGGGAGGGTGTACAAGGGTGTCCTCCCCTTGTCCAAATCGGAGATCGCCGTGAAGAGAGTGTCACACGATTCGAAGCAGGGCATGAAGGAGTTCATCGCCGAGGTGGTCAGCCTCGGCCGCCTCCAGCACCGCAACCTGGTGCAGCTGCTGGGATATTGCAGGCGCAAAGGTGAGCTCCTCCTAGTTTACGACAACATGTGCAATGGAAGCCTTGACAAGTACTTGCATGCCAGCGACGACCGCTTGTTGGTGCTGGACTGGGCTACGAGGTTCCGGATCATCAAAGGCATAGCCTCTGGCTTAGTCTACCTCCACCATGAGTGGGAGAAAGTGGTGATACATCGAGACATCAAGGCCAGCAATGTCCTCCTCGACAACGAGATGAAGGGTCGATTAGGGGACTTCGGCCTAGCGAGGCTCTACGACCATGGCGCCGGCGCCGACCCGCAAACTACCCGCGTGGTTGGCACGCTAGGGTACATAGCGCCGGAGCTAGGCCGCAACGGCAAGGCATCTCCCGGGACAGACGTATTTGCTTTCGGGGTGTTCATGCTGAGGTTACGTGTGGGCAGCGGCCTATCAGTCATGAAAGAACAGACGATCAGGCCTTGCTGGTTAATTGGGTGCTTCACCACTGGCAAAATGGGTCCATTTTGGACACGGTGGATGCTAGGCTCCACGGCAACTATGGTAAGGATGAGGCCAGTTTGGTGCTAAAGCTTGGAATTCTATGTACGCACCCATTCAGCGATGCAAGGCCCAGCATGCGCCAGGTTATGCAGTATCTTGACGGCGGCACGCCCTTACCGGACCTGATGCCGACCTACCAGGTGATATCCAACATGCTAGTCCCACTCCAAGCAAAGGAATTCCAACAAGATGATGATAGTTCATATCTCCAATCCAACGCAACTAGCCTCTCAGGAGGAAGATAACAACAACACTATTGGTGTCGGCGTCTATGTGTCATGTACACATGTCTACTTACTTGCTCGAGCTTCCCAACAATATGTAACCGTTTTTGACACAAGTGGAACCTAAATGTTGAAACTTTGATTAGTACTATCTTTGAAATTATGTACTTCACCTGTTCCTAAATATAAGTGTTTTTAAAGACAACACTAGAGACTACATATGAAGCA
>HvleckRLK95
ACGATGTTAAGATTTAAGCTGGAGCTTCAAATTGGGTACGCCTGCTAGGTACTGTAGCCTTCTGCCCTCCGATTCAGACTGCAGGATAAATGGATTCAAAAAGACAATATCAGAATCATGTCATGGAAAGCAACATCAGTGGCAACAAGAATCAAAGTCTAAAGCACAAGACGTTGAATGTTTCTTTTTTCCTTTTTCCCGTGAACTGAGATATTATTTTCTAGAGGATGTTTCTGCAATGGTTGCTACGCTAGAAACCAGAGAAAATTTGCTAGGCTTTTCAAAGGTTCCTCATACAGGGGGCTGCACAGGTTTTCCACATTATGCATTTAAGATTACTATTCCAGTTCAGAATGCAACAACTGAATAATCTCCAAAACTTAAGAGGCAGACAACAATGTTGTCCTCTAGAGTCTAGACACATTTTCCCATCGTTTTCAGTTAGTCTATCTTTAAATGCACTTGTTTACTACTTTTGGGCCCGTCAACTTCACTGACTTTACCTGGCAAATGACTACAAGGATTGATTGGGATCCTCTGCCCTTGCTGCAACGGAACAATGATGTTCAAATTAAGCCGAATCTTCAAATTGGGTACCCCTACTAGGTAGTGTGGCCTTCTAGTTCTGCCCTCCGAGCAGAGTGAAAAAGTTGAGCGTTGCTGTACTTCACAGACATATCCAGTTACCCATCCACGCACCTGCTCTTGCCATCTTGTCCATGGCCATGTCAAAAATGGCACCCATTTCCATGTTCTTTCTAAAGCTCCTCCTCATCGGCCTTAGTGCACCGCAGTTTATCGCCGGCGATGACAACCATCGGTTTGTCTACTCAGGCTTCGCCGATGCTAGCCTCGCCCTTGATGGCACAGCCTCGGTCATGCCAAGCGGGCTGCTCGAGCTGACCAATGGCACGGCCATGAGCATGGGTCATGCCTTCTACCCGGCTCCGCTGCGCCTCCGTCACTCGCCCAACGGCATGATACAGTCCTTCTCTGCCTCCTTTGTGTTTGGCATCATCTCCATCTATTATGACTTGAGCAGTCAGGGCCTCACCATGTTGGTCGCACAAAGCAAGGATTTCACCAAGGCGATGCCAGTACAATACCTGGGCCTCGTCAATGGCTCGAACAATGGCAACACAACAAATCACATCTTTGCTGTCGAGCTTGACACATGGCAAAACCCTGAATTTGGGGACATCAACAACAACCACATCGGCATCAACATCAATGGCCTCGCCTCCGTGAAGTCCCACCCAGCCGGCTTCTTCCACGACCAGAACGGCACATTCAAGAACTTGACTCTCAGTAGCCAAGAGGCGATGCAGGTGTGGGTGGACTATGATAGAGAGAAGACGCAGATCGATGTTACCATGGCTCCTCTCGACATGGCCACCAAGCCCCAGCAACCCACTGTGTCCGCCAGGTACAACCTCTCAGTTGTGCTCACAGACGTGGCATACATCGGCTTCTCATCTTCAACAGGCAGGATCGACGCACGGCACTATGTGCTTGGTTGGAGCTTTGCCGTGAACAGTCCTGCTCCAGCCTTCAATCTCACCATGCTTCCAAAACTTCCACGGCATCATCCCAAGGGTCGTCAATCCTGGGTGCTAGAGGTAGTTCTGCCGGTAGCAACGGCAGTAATCCTCCTGTCTTTGGGCGCCGTTGCTTTCATCCTTGTGCGGAGGCATTTCAGATACTCGGAGGTACGAGACGACTGGGAGGTGGAGTTTGGCCCACACCGTTTCTTGTACAAGGATTTGTACCATGCAACGGGAGGATTTGAAGACAAAAACCTTCTAGGAGTTGGAGGATTCGGAAGAGTGTACAAAGGGGTGCTTCCAAGATCCAGGTTGAAGATAGCCGTGAAGAGGGTGTCACATGATTCCAAGCAAGGCATGAAGGAGTTCATCGCAGAAATTGTCAGCATAGGCCGCCTTCAGAACCGTAATCTTGTGCCATTGCTTGGTTATTGTCGGCGCAAAGGTGAACTCCTCTTGGTATACGAGTACATGCCCAATGGAAGCCTCGATAAGTGTCTGCATGGCAAAGAGGATAACACAGTATTGAGTTGGGCTCAAAGGTTTCAGATCATCAAAGGAATTGCATCTGGCTTGCTTTATCTCCACGAGGAGTGGGAGAAAGTGGTTGTTCATCGAGACATCAAGGCAAGCAATGTGCTTCTTGATGATGAGATGAATGGGCGATTGGGTGATTTCGGCCTTGCAAGGCTGTATGATCATGGCATCGACCCACAGACTACACATGTGGTTGGCACCATAGGCTACCTAGCTCCAGAGCTAGCACGCAGCGGAAATGCCACTCCTCCTACTGATGTATTTTCCTTCGGCATGTTCGTCCTTGAGGTCATCTGTGGACAAAGGCCTGTCAATCACCAAAACACACAAGACAGCCAGCTCATGTTGGTTGATTGGGTGATCGACAATGTGCAGAAAGAATCATTCTGTGATGCAGTGGATGCTAGGCTAAAAGGGCGGTTTGATGTTGGTGAGGCATACTTGACGATAAAGATAGGGCTACTCTGCTCACACCCATTTGCCAATGCAAGGCCTAGCATGCGGCAAGTCATGCAATACCTAGATGGAGAAATTGAACCTCCAGAGTTAAGCTCCGAGGCACTAGTTGTGATGCAAAACGAAGGATTCGAGCCATACATCATCTCATACCCTGTGTCAACTACAAGCATTGGCACAATGTCTCACATCTCAGAAGGAAGATGAGCATGGTGTTTTGTCATGTCTGATATCCCGGTTTATTTATTAAATAACTTAAGGATAACACATATATTGTAAGTGTGACGACGCATATATAGGAAGCCTATCTTTATACCTTGAGGATAGTTTTAGGTTGTCTGTTAAAACATCAACTGCTTGTTTGTTCTGTTATGTCGTGTATTCCAGTGAGTCATCTTCCTGTAACATACTGCCAGTGTAATAAATCACTAGATTTGCCTTCATAAAGCCTTCTGATGGTAAGTGTTCACAACATTCATATGGAGTGTGCTTGTTTTAATAGCAATTCAAATGTGGTGTCCAGAAAAATTATAAATCTGGATGGATAAAAAACCCAACCAACTAAGCTAGATGCAACTTGTTCACTCCCCCAGAAATTTCCTATCTGCAATTCATATAAGAGGTCAATGGTAGAAGTATATGATAACATCTACATGTATCCTATCTGTCAAGAATATTTAGCGCTCCGGAAAAGTAACGGCATGAACAGGCAATTTTGGTAGGATTTTCTGTTACCAATGTACGAGTACCTATGATTTTCTGCAATTTGGTCATAAATCAAAGATGCACCAATATACCAATGCTAAAAAAATAGTATCTCAATTTTCTACAAACATGGAAGATGGACATAAAGAACAATTTATATTAATTAAACTACAACAGTTGCCAATTTAGAATGTACTGATTTTATAGAAACAGTACAATTCTTGCAAGAATTGAGAAAAAAGATCATCACCAAATCAGGGTATAAGTTGTTCAAGTTTATACATGTATAGTAAACATGTTTGAAATACTGGCCGTGCAACACCATTCAGCTAGTTGATTTTTACTGACTTGAGGGATTGAAACTAAAAGCACCACTTGATGCCCGATTTGGACCGCAAAATAAATGGACTCAAAGGACAACATCAGAGTCATGTCATCGAAAGCAACTTGAGTGGCAATAAGAATCGAAGTCTAAAGCACAAGATATAATTTTCTGAGATGACGTTTCTACAGGGGAGGTTACACTAGAAACTAGAGTATTCTTCGAAAGTTCCTGATACATGAGGCTGCACATGTTTTCCACAGAATGCAATTAAGACTACTATAACTCACTCATAGGAAAATACTTCCTCCGTCCGGAATTACTTGTCGCAAAAACGGATAGAAATGGATGTATCTATAACTAAAATACATCTAGATGCATCCATTCATCGAACAAGTATTTCCGGACGGAGGGAGTATTTAGCATCTCTTACGTGGATGATAAATACTACTAGACCATGTCTATCCATCTTTCTTAAATACTCCCTCCGTTTTTTATATACTTCGCATATTAGCTTTGTCTCGGATCAAACTTTTTAAACTTTGACCAAGTTTATACAAAAAAAAATAGCATCCACAATACAACATCAATACCATTAGAATCATTATTCAATATATTTCCATACCATATATATTTTTTATTGTGGAAGTTTAGATTGTTTTTGATAAACTTGGTCAAACTTCATAAGGTTTGACTTAGGTCAAGTCTAATATGGAGTAAATAAAAATGGAGAGAGTAATATCCATTATCTGCTTCTTATTAATAAGAGTATACACATACATGTTGGTTTAAAACTTTAAATAAATAAATACTCCCGACGCCACATGGCTGAAGTAGGCGTTGTTCAAAACAAAACAAAACAAAACAAAAAGGACTTCCACCCCCAGCCTTGATGAAGGCTAAGCAGACATCTGCCACCAATTACTATTTACGGGCAAGCTAAGTGTGTGTTCTTTAGATACTCTCTTCCAGAAACAGGGCATATTTGAAATCCATTCTATTAAGCTTCATGCATTAGCCAATGCAACCAAAAGTCCGAACTGATGAAAAAGGCTCGGCAATCCACGTATACACTTCAACACATTCTACTGAATGTACATAAGATGTTTGCAGTAAGTACTATTCTGGACTTTGCACTCTGAAGCCTGAATAGTGAATACACATATGCCAAGTTCCCTTGATCCTAGAAAACCTCCACATTTCACAGTTAGGCAAAGAATACTGTCTGGAAAAAAATTGTGCTATGACTATACGTACATATGCATGAAAGCATGAACATTGCATCAAGCTTTCTTTTCAGTTATTGTCCATCTTTAAATGCATCTGTTTACTTTTACTCGTGTCCATTTCACATGATAAAAACGAAAAGGCTACAAAGGTTCGTATGAATCCTCTGCCCTTGCCGCAACGGAACACTCAGACTAGACATTTTCTGCAAGTAGGATTACGTTCTCTGTCTCTACAAAAATAATAATACTAGTACGATTACAGCTTCTGGACTTGGTACTCCAAACTCTGAGTTATGAGATGGCAAGTTCCCTCCATCCTAGGGAATATCAGCAACGCCTTGGACAAACAGTCCATATCATAGGTACACATCAAAGCTCTATACGTTGCACGGAGCTTCATTGTCAGTTATTTTCCATTTTTAAATGCACTATCAAATTTCATTCTAGTCCATTTGACTTGACAAAAGACTACAAAAGGTTGGTCGGGTTGCTCTGCCTTCGCTGCAACGGAACAGGGATGTCCAAATTGGACTGTCTTCATATCCCCGTCTAAATCCCACAAGTCATTGTCTTGGTTAGACAGATTTTTGTTAAGCTTGACAGTGTTTATAAATCTTGGATGAAAGCAGAGATTCTACATTATGCTTGTGTTGAAATTTGTAGCCTGTTGGGGGCGTACATGGTGGTTCTCTTTAGAAGTTTAATTTGGATCCATAACTTATTTACAGCTACGAAATATGCCTTTTGTAGGAGATTTATTAAAGTACATAATACAATCCAGACAACACGACGCGTACACACCCGATGTGCATCTCCCATCTATGGCAGGAAATAAATCTGAACTACTCAGCGCTGTCTTTGTGACATGCTATAGTAACTTAATCTAGCGACTGACTATCTGTTAGGGTGTTCCTCAAAATTAGTTCTAATACGGTATTCACAATAACCTGAAGAAATATCACCGTCTCCATCAACTATTGAAGTTTAGACAATGATAGGTGTCGAAAACCAAGAGACTAGACTTGGTGTGGAATTGTAATATGAAATACTGCACCACTGAGTGCAACCTGAAACTACATACCATTCGTTCCCCATGAAAGACTTACCTCCCACATGCCACTTGTTGAGTTTCAGCTTGCAAGTCACAAGCATGCTTGCAATGAAGCATACATCCTTCCTTCAGCAGTTCCTCCTCCTGTTTGGTCTTATCATCGCAACCTTGGCCTCTGGTGATGATCAATTCATTTTCTACGGCTTCAACCAATCGAGCCTAACCCTCGATGGCAGTGGTGTAGTCACAGAAAGTGGCCTTCTTGATCTATCCAATGGGAGGAGTGGTCTCAATGGCCATGCCTTCTACCCCACTCCTCTGCATTTCCGCAAGTCGCTGGGTGGTAAAGTCCAATCCTTCTCAGTCAATGTAGTTTTCAGCATCTTTATCATGTACCCAGACCTGAGCGCTGATGGCATGGCCTTCTTCATCGCCCCCACCAAGAATTTCTCTGATGCACGGGCAGCCAAGTATTTTGGTGTCCTCAACGAGAAGAACAATGGCAACACAAGCGAACACATATTCATGATCGAGCTAGACACCTATAAAAATGCTGAGATCCAAGACATCGACGACAACCATATCGGCATTAACATCAACAGTGCAGTCTCCTCGGAATCTACAACAGCTGGTTTTTATGAAGACGAGGGTGGTGCCTTCAATAACATGACGTTGAATGGAAACAAGGCTATGCAACTATGGGTAGACTATGACGAGGGTGATACTCAGATCAATGTGACCTTGGCTCCAATCAACATGGGCAAACCATCAAGGCCACTGCTCTCTGCAACCTATGATCTCTCAACTGTACTTTCTGACTCAGCTCAATACATTGGATTCTCATCCGTAGCTACTCCCATCAACACCCGTGATTATGTGATGGGTTGGAGCTTTGGCATGAATAGACCAGCTCCATCCATTGACATCTCCAAGCTTCCTAAGTTGCCTCTTGTTGGTCCCCAGGCCCAGTCCAAGCTCTTGGAGATCATCCTACCAGTAGCCACGGCAACATTGATCCTCTCTATGGGCACTCTTGTCACCCTAGTTATGCGAAGGCGAATCAAGTATGCTGAGGTGCGTGAGGATTGGGAGGGAGAGTTTGGTCCGCACCGATTCTCGTACAAGGATTTGTTCCATGCCACGGGAGGATTTAAGAACAAACACCTACTTGGAGAAGGAGGTTTTGGGAAAGTATATAAAGGGGTGCTTCCATTGTCTAATGTAGAGATTGCTGTGAAGAGAATGTCTCATGAATCAAGACAGGGGATGAAGGAGTTTGTCACTGAGGTTGTTAGTATCGGTCAACTCCGCCATCGCAACCTTGTGCAGCTACTTGGCTATTGCCGGAGAAAAGGTGAACTGTTTTTGGTTTACAATTACATGCCAAATGGTAGCCTCGATAAATACCTACACTCTGAAGTGCAGACAGCCATTTTGAACTGGGTTCAGAGGTTTCGAGTAATCAAAGGCATTGCTACCGGCTTGCTTTATCTCCATGAGAAATGGGAGAAGATAGTGATCCATAGAGACATCAAGGCAAGCAATGTACTCCTGGACAGTGAAATGAATGGGCGGCTTGGTGACTTTGGCCTTGCTAGGTTATATGATCATGGCACTGACCCACAGACCACACATATGGTTGGTACGAAGGGTACCTAGCCCCCGAGCTACTGCGTACAGGGAAGGCATCTCCTCAGACAGATGTTTTTGCCTTCGGCCTGTTCCTTCTCGAGGTTGCTTGTGGGCAAAAGCCTGTCAAGAAAAATGCAGAGGGAAATGAAGTTTTCTTGGTTGATTGGGTACTTGAGAATTGGAACAGCGGGTTGCTTATAGAGACAGTGGATGTTAGGCTCCAAGGTGACTACAACGTTGATGAGGCATGCCTCGTGTTAAAGCTGGGGCTTCTGTGCTCGCACCCGTTTCCTAGTTCAAGGCCTAGGATGCGGGAAGTTATGCAATACCTCGACGGTGATATGCCACTGCCCGAGCTGAGGAAGACGGAGTTGAGCCTGAATATGGCGGCATTGGCCACAAACAATGGACCCAATGCATTCATCATGTCATATCCGCAAATCACGTCGAGCTTCTGCACGATGTCTGGCCTCTCCGGAGGAAGATGATGCCCACAGAATTTCGTCGCTGAATACTGGCGCTGTTTAGTATGAGCACATATATTAAAATGTACTCTCTCCGTTCCAAAGTAAGTGTCTCAACTTTCTATTAACTCTAGTACAAAATTATAGTAAGCTTAAGCTTGAGACACTTATTTTGAGACGGAGGGAGTAGTAGCATGTCCTAGAAATAAACGTGCAGAGGATGATCGGTTGCATGTCTAAAGTACGTACAGCAATTTCATTCAGATGCTCATAAGGTTGTATCTTGTATGTATTGGACGGTTTTATGTATGTTTGCTTTTCGGACCATTTTGTGCAACTTGTTTCGGGAAATCAGGAACATTTTCCTTTGTTTCATGCGCGTGTGTTTTGTACAGATTTGTGGCAGATTTGCTGTTCAAATTGCACTGCAGGGATTTCAGATACATTTTTTCTAATTTTCAGACGTATGTTTTCGATTTAGTTTTAGGTCGTTTTTTCATCCGTCCGATCAGCACGAATCTCGACGTCTTTGTTTTCTGTGCGGGCTTTCTTCCTTCTCGGTTGCGGGCTTGCGGGTCTGCGTTCCTCCGTGTGTTTTTTCTGAATTTCCATTCAGTAGGTGTGTAGCCGAGAGAGGGGATTTTCTCAGGGTGGGCGGAGACGGCGGCGGAGGCTGCTGGAGGTCCATGGCGTGCGGCGAGGCGGCCGCAAGTAACGCGTCCACGCGGGAGAGGCACTTCCCTGCAATGGGGAGGGGTACCAGAGATGGTCCGGTGGGCTCGGCGGAGCTGTCCCGTCGGGCACTCCTTCAGCCAGCAGCCGTCGCAGGGGCGGGAGGTGATAGCCGTCGTCGCCGCTCAAGCGGAAGGTACTGGTGTGTTCGCTATTTGTACCTCCTCCCCCCCACCCCCTCACTCCCCGTGTCTGATTTTTAATTCAAATTTTCCAGTTGACCCTGAGTTCAGCATTTTTAGCAAACCTATCATTCTACATGTGAGTTCAACATTTTATAAATCAAGCCTGGTAGAAATTCTCATTCTGCAGTCATGTATGTTTTTGTGGGTTCAGTACCATCAATTAGAGGGTTCAGTACCACAAATTGCTCAGTACCATCAATCAGTATTTGGGTGTTTGTAGTTTACTGTTATAGTAGCTTGTATATGGTAATGGGTACTTTCATTTTCAGTATCGAGCTAGCGAGCGAATTGAATCAAATTAAATCTTGTATTTTCCAGTTTATATTGTCATTCATTCATGGTTACGATTGCAGAATGAGAGGCATATTGGGTTAATTGTTTGGGGAGAAATGCGATCCAAAAATCTTTTCTGCATCATACAGGCCATATGCTTGTAAATAAGCAAGCAAATGCATGGAGTTAACTCATTACCTGTCTTGGGATTTCTCATGTTTTGTATTTAAGATTACAGGTGAGACGGCGAACCTGAATCGATCACTCCAATGATGATATCTTCACCGTACTTTGCTTTTTTTAGTAGTCCAAGTTGTTGTGCTGGCTGGTTATGGTGAAGGCCAAGGAAGTCCCAACTTAGTTGTGTGCATTTGGTGAAAATTGTTAGGCTTCACAGAGACAACTTCAGGAAATTCTACATTCAAAATCTATGTTAATTAGCTTATGCCGATCATACAAGTAGATATAAGGTTTGTATATATGATATTTTTCATGGGTACTTTCTTTTTCAGTTACATTTATTCTCCTCTCATGCAGGTGTGCAGAGTTTGCGGGTCACAGGTCATCATGTAGTGGGTTCGAACCCAACTACGACCCTGATGGTGGTCTGTCGGACAGCGATAGTCTTGAGGATAGTAGCGCATCGACTGATGATGTATGATCATGTTTTAGTCATTTTTTGCAGTGGTTTATGGCCCTGATGGTTGACTAGTTTCTTCCTTCTTCTTTTTTGTTTATTCATATTTTTGTTTTGCAATAACAGGAGAACGTGTCTAGGCAGAAAAGGTTGTTAGAGGATGCTTTGTTTGGTTTTTTCAAGAAGGAGGTATACTTCCTTTTTATTTTTTGTTAGTTATTTTTTTTTCTATGACGGCATTTCCTGTGTTTTCATCCCAATGCTTTATTTTTTTTCTATGACGACATTTCAAGAAGGAGGTATACACCTTTCTGACAATGCTCTATTTTTTGTGTATGTTTATTCTTTGGGAAGGCTATTAAATCACTCAAGAGAGATTTCTCAAAGTTTTGCCACAATGCCAAGTTTTCATCCCAGGTTGTTTTGTCAACTCTTAGTGATTTTTTCTATAGTTTCTGATTTTCTTATTTTCTTTGTTCCTTTCTTTTCAGTTACTGATTTTATCACTTTGTGTTTCTTCAGAATAAAAGGCTAAAAGCACCAAGTGTGGGAAGGGATGCATTCAGTGTGTATTCTGGCAAGTATTTCTCTGAAATTATCAAACGCATGCCAATAGGACGGAAGGATGTTATCTCAAAATACGGATATGAGTGTCTTCGGAAGTATGAGAGAACAGAAGTCCCTTCTCCTTTTGTCAGATGGCTTGTTGGTTGTGTCGATACGGTGTCCTCGCAATTAATCATTGTCGATGAGAAGATTATAGAGTTGTCCAAACAATCTGTCCATCTTGTTTTGGGTTTGCCTAAGAGCGGTGTTGTAGCAATGCCTAACAAGGAGAGTGGGAAGAATTTCATTCTGTCTCGGTTCAATTTAGCAGAGCTCCCCAACATCACTTACTTTGGCAATTTGCTCATGTCATCTGAAGAGCTCAGCGAAGAAGATACTTTCATTTGCTTTATGATAGTAGCTATGTCATGTTTCTTGTTCCCTTCTTCAAGCGATCAGATACACACCGATTTCTTGTCGATTCTAGAAGATCCTTCTGCTACAAGGGGTTTCGACATGTGTTTTCTCGTCTACGAATGGATCCTATCTGGCATCAACAAGTATGTGATGTTCGGTAAGGAAACTGGCCGGAAACCGAAGGTTTTTGACTTCTGTGCCTACTGCCTCGCGGTTGGTCTTTTACTTCTTTCTCTTTTTATTTCCCTGTGTTGTTTGTGCACCTCTTTATTTTTTTGTTCTTCCTTTTCCATGTTGAATATATGTGTGATTTTATTTGTTGGGCGTAATTTGTCAGGTCTTATACCTTGACAAGCTTGATTTTGGTGTACGGGTGGTCGATCAAGGCGTCCCTAGAACTACTGCTTGGAAGGGGAATTTGATAAAGCACTTTTCAGAACTTGATCGGNNNNNNNNNNNNNNNNNNNNNNNNNNNNNNNNGGAAGAGGAGCAACTTGTTCGGAAGGAGACAATTCAAGAAACATGTATGTTTTGTGTTGTTGTTATCCTTGATTATCATCTTTCCTTTGGTCTTCATAAATGTGCTGATTCATTTTGTTGTTGTGGGGCCAGGATGATTCCAAAGCACATGTTGGGGCTCGGCATAGCAACACAAGGTCAATGGATGCGTCATTAGCCTTCAAGGACAATTTGATGTCTACTTTCGCTAATGTGCTACTTGTTCAGGCAAGCGGTTTTATCTATCTTTCTTTTCTTCATTTTTTTGCTTCACCTTATATGTTTCTCTTTTTTGTGTTCTTGTTTTTTGGTTACTCATCTAGTTTGACATTACTATGTTTTATTACAAACAAGTATGTCTTCGCATGTGGAGAAACACCAACAAAAGGGGCAAACGGGAGATTGTATTTGTTAGTTAGGAATGTTGTGTCAAAGTTGATGCAATCCCCATACTCTTGGTACATAAGTCTAGACCTTGCATCTGACCAGAAAACACTCCTGACCCTGTTCTTTGCATCTACCTCTATTGAATAACAAAATCCAGGGCTCTCGGCTTGTTTCTTTTGGAAAAACGGTTGCATTTCCATCACATCAGTATTTTCCATTTCTCTGCTTATGGTTGTTCCGTAATTACTCACTTTCCGTTTGTTGTATGGTAGTTTGTCCATACATCCCCTTATGTAAGCCAACAACGCTACAATTTTTCTTGTTGGAATGTTGCACTGTTTCATTGTTCTGATCAAAGCTTTCTCTTCTGCAGTCATGTAAACGTGGGACCTAAAAAACCTACTCCCAGGGTCAAGTGGATGGTTATGTTCTAGATGGACATTTGTTATGCGCCACACCACATCTTTCAAAGCAATCAGTATTTTGACTTCACAATTTGTTTTGTCTATAACAGTGCTCTGCCTTTCTGCAATCAGCTTTTCCCTCTCAGCCTCCGTATTGTGTCCATACTTGTTGCATTTTAGTGTCACTCTTGTGACCTCCCCATCTCTTTTTTTGCTGGTCGTGCGGGAAGTCGAGACGATTGATATGGAGAAACCAGCTACGAAGGCGTAGAAGTTTAAGAATTTTTGAGCCTCTTCCCTTGTTTGAAATTGCATCCCTGTTGCAGGTTTCAGCTCACTGTCAATGCTTCTATTGTTCCTTCCTGAGAAGCATGTCTTTCACTCTCCAAAAAAGCGTATATGGTTTCCTCATTGATGTCATTTTCTTCATTCTCATTGTTTTCTGTTTGTTGTCCATCTGCATCAAGCGACGTGCCTCGCTCCCGATCCTGATCGTCATAGGAACATTCATCATCAGTTGTTTCTTGATCCAAATTCCAAGTATGAATTTGCTTTTTTTACTTTAGGCCCTTCACCTCCTGCATTATTCGTTTCAACCTGCATATGAAAAGCATACAATGATATGTTAGTTTATTTTTTTCATCTGTCCCCACAATAAAAGATATTGCATTAGATAACTAAACTTTTTTAATGTGCCCCCCACCCCCAATAAAAGATATTGAAATAAATAACTATTTTTTTCATGTTTTTGTGGAACTAACCTGGTCCAGCTGTATATCATCAAATAAGGTTATCCTCCAAGGATCTCCATCAGTCTCATCATTGGAGACATTGTCTTGTTGTTGGCGGACCGCAATCATTGCATCTTCTTCACCAAGATTGGGACTGTGAGTTGCATAACTCTGTGGCCCATCCATAAAGACACCCATCCCCCCTAATTCCTGGAACATACATAGAACCACGAATCTTTTTCCATGGTCAACTAATACAAAGGGTTGGGGTGAGTGTCTTTCCCCTTTTGTTATCAACGTTTGTTTATTCATTTGACGTACCTGATATCCTGCAGCGCTGGTTGATGCACCGTTGTCTTCCAAGTTTTCAGCAAAACTTTGATCAGTTAAATCATCCTCATAATCAGCATCAACATTTGATTTTGTGTGTTCACCTGAAGTAACACATAGCTCATGGTCCTGCATATATTTTGAACATAGTTAATAGCAATTAGCCGTTTGTATATAATTTTTCATTTTTGTTCCTCCTTTTTTCTCCTTTCCTGTAATCAAAACTATTTTCCTTTTTTTCACAACCAGCTTACCGTGTGATCCAACAGATGTTGTCCGTTGGTCATATCAAGATATCCACGCAGCAGCGCAACGTAAGAGAAGTTTGGCTGTATTTTTTATGCAACAAAATTTTCTCTTCTGTCATCAGTAAGTTTTTATCAAGAATCAATACATAAAAAGGAGTAATTCTTTATCAGTTACCTGCATGAATAATCTTTCTTGGCTTCCAAGGCAGTTATGTGGGATGTAATTATCCCGAGAACCATGTCCCTGAAAATAAGAATAATGCAAGTAAGTTCTTCATGTCCATAGTTTATTCAGTTATCAGTATTGTAGTTATCATCAGTGTTATTTGTATCTCATTATCTCATTACTTTCCTTCATTATTCAGTTATTTCAGTTTTTCAGTGTTTCGTTTGTCATCATTTTATTGTCAGCATTCATATTTTAGTGTTGTTCAGTCACTTTTCATCAGTTTCTTTTCATCAGTGCATTTTGTTCAGCCTCATTATTTATTCAGTATATGTCACTTTTGATTCAGTTATGTGTTTTATTATTTTAAGTTTTCAGTATATTTGTCGCTACTCATCAGTGTTTTCTCCGTCTCGTCTTTAGTCTTTAGCGCTTGAGTATTCAGCCTCATTATTTATCAAAAAAAATTAGTTTCAACTGATTTTATTATTTTAGTCCATCATATAGTATTTACATTTCAGTATATGTCACTTTTGGTTCAGTTATGTGTTTTATTATTTTAAGTTTTCAGTATATTTGTCGCTACTCATCAGTGTTTTCTCCGTCTTGTCATTAAGTCTTTCGCGCTTGAGTATTCAGCCTCATTATTTATCATTTAATTGTTTTCGTCAGTACTTTAAGTGTTAGATGTCATTATTTTAAGTTTTGCCTTTTTTCAGTTTAGGTGTCATTTATTTCAGTTTTTCAGTGTTTTGTTTGTCACCATTTTATTTTCAGGATTCATTTTTTAGTGTTGTTGAGTCACTTTTCAGCAGTACCTTTTCATCAGATTTTTTTTTGTTCAGCCTCATTATTTACTATTTCAGTCCATCATACATTATTTACATTTCAGTATATGTCACTATATGTCGTCTTTGGTTCAGTTTTGTGTTGTATTATTTTTAGTTTTCAGTAAGTTTTCGAATACAGGGTGTTGATATTCAGTTCTGCTCAGTCTCACTCGTCGGGCATTCAGTCTTCATGAAATTTTTTCTATCATTGTAGCTGTAATTTTAGTGTCAGTTATCAGTATTGTATTTTTATCTGCCTATGTTCAGTCATGTTGTAGTTAGCTTAATTTTTTTTTATTTCTCTCTGTTTTAGTTTCAGTAGGTCAATCTTTGATCCATCATTAGTCTAGTTTAGGTTAAAAAAAATTAGAGAGAGCACCCCCATTTCCTGAAGTTTGTTCTTTTTAATGCCAAACCATAAGAATAGCAAAACCTTATCTCCTAAAATAAACATAGTGTTGTGCCGAACCATTCGGTTGGTCTACAGTTTCTTCCTTTCAGAAAACATTAGTTTGGGTTATAACATTTTGTATCACTGAGGCTTTGTATTCCTGATTTTGTATATCAACACCCTGTATTCATGTTTTGGAATCTTGTTGTCGGTTTTAGGAAGGTGTTTTTTTTTCTCCAGTCCAACTGGTTAGCGCTCTTTGTTCTTTGATGGTCAGTATATGTGTCCTCTGTTTTTTTATTTCAGATTTCTGTATTTTGTCATTAAATTTTAAAATCACTCATTCTGCAATCTTTGTAATTGTCCAGTCTTTCAGTTTTGCCTTCCTAGTCCGGGTTTGGGCATATGTTTGTTTAGTGCAACCAATGTGAGCAAAATGATCAGCCACCGGCTACAAGAAATACTCTCAACAGTCTAGCACCCAGCTGCCAAAATCAAGAAAACCATTGGCGGACATTGGACCGATGTAAGTGCACTAGTATTTCAAGGAATACCGATCGAAGTGTCTCCTTTTATTTTTTGAAAGATGGGATACCAGATCTAGTTTTGGGCTTTTTGCTGTCATGGAGATTCTGGTAGTGTCATTGCCTCATTTGGCGTGCATAACTTTCAGGTGAAACAAGATGGGGCAAAACGGAAGCAGGAGAAGCGGCCCGAGCCGGCAAAAACTCAGCTCGTCCTTTGCTGGCAGAATTGCGGTCTTGAAAGGTGTATGAGCACTTTGCTGGCACTAGTTATTTACTCTCTAGGGGCAAAATGTTCTACCTGAACTGATTGGGGCAAAATATTCTACCTGCTCATTTTTAAACTAATGCAATGAAACTTTTTCTCAACCAAATTAAAAAAGCTCGAGATGCTCCTTGCCCTTGGGATGCAGGTAGGCATGGATGATGATAGATTCAGATACTCAAACTTCCACAAATGATATGTTTGTTCAGACTTCAGAACTCTGAACTGATTGACACATGCACATCAGCTCCACATCCACACCAACATACGGCTGCTCTACACTGACTTGACATACGCACACCAACTAAGAAATGTCTGTCATTTCTGAATTTTCAGTTTACGTGCACAACACTAATTTTCAGAATGCAGGAACGGGATGGGGATGTTGCATTGCTGGGGCAGGGAGAGGCGTACCTTAGTTGATTCCGCACGCGGCGGCTCGAACTTGTCATGATCTGGATTGCAAGGAGCTCCAGTTGCATCAAACCCCGGATCAATCTTCATGTCCTCTCCCCTCGACAGCCGCCGTCACGCAGCTAGGGCAAAGGGAGACGCCCGGGGACGGGTCAGGGGCTGGATGAGTGGTGGGTTTCCTTCACGGATCCGAGTACGCGGCCCGTTAAGAATATACTAGTGACCTGAGCCCAGCTATGTATCCTCGGACGCATAAATCCGGCCTGAGCCCAGAAGAGAAACAAACGTTTTTTATAATGAGTTGTACACTAATTACTGACCATAGACACGTGTCTAAATGAGATTGAACTTAGAAAGCGGCCTAAACCAAATCAAAAAACAGATGTGT
>HvleckRLK96
TTTCACCCGACGACTACTTCCCCACCCTGCCCCACGGGGACGGAGCGCGAACGCTCGATCGCTCCCGCTGCTCGCGCCGGTCGTCGCCATGCCGATCGACCTGGCCGCGTTAGTCTGGCTCCTCCTCTTCCTCGCTCTAGACGTCGCCGGTGCCCAAGAGTTCGTGTACGCCGGCTTCGCCGTCGGCAGCGTGGCGACCACCGGCGCGGCCGCCGTGCTCGCCCCCTCCGGCATCCTGCGGCTCACCAACGACACTAAGGAGGCGTTCGGCCACGGTTTCCACCAGGCGCCCCTCCGCTTCCGGGACGCCTCCACTGGCGCGCCCGTCTCCTTCTCCACCACCTTCGTCGTCGCCATCGCGCCACGGTACCCGGACGCGCACGGCCACGGCATCGCCTTCGCGCTCGCCCCCTCCGTCGCCGTCCCCGGTGCCGTTGCCGGCAAGTACCTAGGACTGTTCAACACGTCGGACAGCCTGGGGAACGGCACGAGCCTGATCGTCGCTGTCGAGCTGGATACCGCCATGGACGCTGAGTTCCATGACGCCGACGAAAACCACGTCGGCATCGACGTCAACGGCCTCCACTCTGTTAACTCAACCCCGGCCGGGTACTGGCACGACGACGGCTTCGGTGGAACTAAGTTCGACAACATCAGCCTGACTGGCGGTGGCGACGCGCCCCTGCAGGTGTGGATCGAGTACGACGGCGAGAGAGCGCGCCTCGAGGTGACGGTGTCGCCGGCGGGCGCGCCCAGACCGGCCGTTCCGCTCGTGTCATGCAACGTCAACCTCTCGAGGGCCGTGGCCGAAGACAGCTACGTCGGCTTCTCGGCCGCGAACGGCGCTGCCGCGAGCTCGCACTACGTCCTCGGCTGGAGCTTTCGCCTCGGCGGCGGCCGTGCCCAGGACCTCGACCTCTCCAAGCTCCCGCGGCTCCCGTCGTCCACATCATCATCATCATCCAAGAGAACGATGCCGCCGCTACTACTCCCGATGACGCTGCTCGTCCTGGTCGTCGTGATCCTGCTCCTGGCCTCCGCGGCCGTCGCGGCGCTCGTGGTGCGGCGGCGCCGGCAGTTCGCGGAGGAGGAAGAAGACTGGGAGGTAGAGTACGGCCCTCACAGGATCAGCTATAAAGACCTGCACGGCGCCACCAATGGCTTCCGCGACCTCATCGGCGCCGGAGGCTTCGGCCGCGTGTACCACGGCGTGCTCCGGAGGTCCGGCGCCGAGGTCGCCGTCAAGGTGGTCTCGCACGGGTCGCGGCAGGGGCTGCAGGAGTTCGTGTCGGAGATCGTGAGCATGAGCCGGCTGCGCCACCGCAACCTGGTGCAGCTCCTCCACTACTGCCGGCGGCGCGGGGAGCTGTTACTCGTCTACGACTACATGCCCAACGGCAGCCTGGACCAACACCTGTTCGGTCATCCATCATCGGAGCTGAGCTGGGAGCAGCGCGCCAAGGTCGTCCGGGGCGTGGCGGCCGGGCTGCTGTACCTGCACGAGGGGTGGGAGCAGGTGGTGGTGCACCGGGACATCAAGTCCGGCAACGTGCTCCTCGACGCCGACATGAACGGCAAGCTCAGCGACTTCGGGCTCGCGCGGCTCTACGACCACGGCGGCGACCCGCAGACGACGCGCGTGGTGGGCACGCTCGGGTACATCGCGCCGGAGATGAGCAAGACCGGCAAGGCCACCACGAGCTCCGACGTCTTCGCCTTCGGAGCCTTCCTGCTCGAGGTGGCGTGCGGCCGGAGGCCCGTGGTGTTCAGCAACGAGTCGGATGACTCGCCGCCATCGCCGGGGCTCGTGGAGCTCGTCCTGGAGCACTGGAAGGCCGGGAGGATCACGGAGGCAAGGGACCTGAGGATGGGCAAGTGCGACCAGGAAGATCTCGAGCTGGTCCTCAAGCTGGGGCTGCTCTGCTCTCACCCGGACCCGTTGCGACGGCCGGGCATGAGGCAGGTGGTGCAGATGCTGGAAGGCGCGGCACCGGCGCCGGAGACGTCGCCGGAGGATCTTGGGAACAGCATGACGCTGTTCGAGCACAGCGAGGCATTCGACGGGTTCGTCAGAGTGTCGTTCCCGTCGACGTCAGGGTTCACCACCGCCACGATAAGGACGTCCACGTCAAACTCCCCTGACGAGAAACGGCAGCTCCTCTTCAGCTGAAAGTTCTTCTCAATGTGGCAGCTAATTTGCAACTGGGTACATACATGCACTGTTAACAGTAACATCTGAATCACAGGCATCAACAAAAAATGACAGCTGA
>HvleckRLK97
CACTCACTAGAAAACAAATTCGTTTCCACTTTCCAGACCCTCCCACACTCCCCCGTCCCCGTCGGCTCATCGAAGGCAACGGCGACGGCAACCTCGGCTCGCCGGCAGCCAACGCCGTCCACTTCCATACCCTGCCGCCACCGTCACTCGCTTCCGTTGCTCCTGCAGATTGTCGATCGCCATGCTTCTCCGGCGGCTGGCCGCGGTAATCTTCCTCCTCCTGTTCTCTCGGCATGTCGCCGGTGATCAGGAGTTCATGTACCCCGGCTTCGCCGCCGGCAGCGTGGCAACCGACGGCACGGCCGTGATCACCCCGTCCCGCATCCTCCAGCTCACCAACGACACCAAGGAGGTGTTCGGCCATGGTTTCCATCCAGCTCCCCTCCGATTCCGGGACGCCTCCACCGGCGCGCCCGTCTCCTTCTCCACCACCTTCGTGTTCGCCATCGCGCCGCGGTACCCGGACACGCACGGCCACGGTATCGCCTTCGCGCTCGCGCCGTCGGTCATCATCCCGGGCGCCGTCGCCGGCAAGTACCTCGGGCTGTTCAACACGTCAAACAGCCTGGGCGACGGCACGAGCCAGATCGTGGCCGTCGAGCTCGACACGGTCATGGACTTGGAGTTCCACGACGTCGACGAGAATCACGTCGGCGTCGACGTCAACAGCCTCCACTCCAACAGCTCGACCACGGCCGGGTACTGGCACGACGACGGCTTCGGCGGAAGGAGATTCGACAACATCAGCCTGATTGGCGGCAGCGACGCGCCTGTGCAGGTGTGGATCGAGTACGACGGCGGCAGCACGCGCCTCGAGGTGACGGTGTCGCCGGCGGGCGAGCCAAGGCCGGCCCGCCCGCTCTTGTCGTGCCACGTCAACCTCTCGTCGGCAGTGGCCGAAGACACTTACGTCGGCTTCTCGGCGGCGAACGGCGCCGCCATGAGCTCGCATTACGTTCTTGGCTGGAGTTTTCGCCTCGGCGGCGGCCGCGCACCGGACCTCGACCTCTCCAAGCTCCCGAGGCCCCCGTCGCCGCCGGGATCATCCAAGAGGAGGATGTCTCTTCCACTTATCCTGATACTGCTCCTCCTGTCCGTCCTGGTCCTGCTCCTGGTGTCGGCGGCCATCGCGACGTTCGTCGTGCGGCGGCAACGGTGGCACCGACAACGCCAGGAGTTCTCCGAGGAGGAGGAAGGCTGGGAGATGATAGACTACAGCCCACACAGGATCAGCTACAAGGACCTGCACGACGCCACCAATGGCTTCCGCGACGTCATCGGCGTGGGCGGCTTCGGCCGCGTGTACCACGGCGTGCTCCCGAGGTCCGGCGTCGAGGTCGCCGTCAAGAAGGTGTCCCACGGGTCGCAGCAGGGACTGCAGGAGTTCCTGTCGGAGATCACGAGCATGAGCCGGCTGCGCCACCGCAACCTGGTGCAGCTCCTCGGCTACTGCCGGCGGCGCGACGAGCTGGTGCTCGTCTACGACTACATGCCCAACGGCAGCCTGGACCAGCACCTGTTCGGAGTCGGACGCGCCGCGCCGGGGTTGAGCTGGGAGCAGCGCGCCAAGATCGTCCGGGGCGTGGCGGCCGGGCTGCTGTACCTGCACGAGGGGTGGGAGCAGGTGGTGGTGCACCGGGACATCAAGTCCGGCAACGTGCTGCTCGACGCCGACATGAACGGCAAGCTCAGCGACTTCGGCTTCGCGCGGCTCTACGACCACGGCGGCGACCCGCACGCGACGCACGTGGTCGGCACGCTCGGGTACATCGCGCCGGAGATGAGCAAGACCGGCATGGCCACCACGAGCTCCGACGTCTTCGCCTTCGGGGCCTTCCTGCTGGAGGTGGCGTGCGGCCGGAGGCCCGTGGTGTTCACGGTGGACCCTGATGGCGAGTCGCCGTCACCGGCAGGGATCGTCGAGCTCGTCCTCCAGCGCTGGAAGGCCGGGAAGATCACGGAGGCTCGGGACCCGAGGATCGGCGAGTGCGACGTGGACGACCTGGAGCTGGTCCTCAAGCTGGGGCTGCTCTGCTCGCACCCCGACCCGGAGCGCCGGCCGGGCATGAGGCAGGTGGTGCAGATGCTGGAACGCGCCGTGCCGGCGCCGGAGATGTCACCGGAGGACATCGGCAAGAGCATGAAGACTTTCGAGTACAACGAGGCGTTCGATGAGTTCGTCGGAATGTCGTTTCCATTGACGTCCGAGGTCACCACCGCCACGACGCTGCCATCCTCGTCGTCGCACTACTCCGACACTCCGCCGACAACAAACGGCAGCCGTCCTCATAGTGGCTTCCACTGAAGCTAGATTAACAAAAATATGTTGCGACTAATTCAACTTCTGTTTGTGCACAAACATCTCAACAGAGAGGAGCATTTCTATCAGAACCAAGACAAGGAGGTTCAATAAGAAAAAAATATGACAAAGTGAG
>HvleckRLK98
CAAAGACGGCAGAGAAACTTCCTCGTCTTATCACTCTCACATGTTGTTGTCGAGTAGATGCGTATTGATGAGCGCCAATGCAAGGACATAGTAAAAGTTAGACCAAAGCGACTCCCTTTGACTAAGGTTCAGTTTTGTCTTCTGTTCCTTGATGATTTGTTTGTGCAACTCTCTCTCTCTCTCTCGGTGAGAGCCTGAAGCAAGCAGAGAAGCACACTCCGTCGTATGTATGCCACAACTTCTGCTTGGCTCGACCGTGAAACACGAAGTGAAGTGACAACCATGTCTGCCAACAAGCTTGCGCTCATACTCGTCGTGGGCCTCCTCATCAACCTTGTAGCCCGCACCGCCGGTGACGACGGCCACCAGTTCGTCTACTCCGGCTTCGCGGGCAGCAGCTTCCTCCTGGACGGCGCGGCGTCCGTCACGGGGAGCGGCCTCCTGGAGCTCACCAACGGCACGCTCCGCCTCAAAGGCCACGCCATCTACCGGACCCCGCTGCGCCTCCGCGGCCGCTCCTTCTCGTCCTCCTTCGTGTTCGGCATCCTGTCGGCCTACCCGGACGTGAGCGCCAACGGCATCGCGCTCTTCGTCGCCCCGACCACGAACTTGTCGGGCGCGATGGCGGCGCAGTACATCGGCCTCCTCAACAGCAGCAACAACGGCAACGCGACCAACCACGTCTTCGCGGTGGAGCTGGACACGATGCAGAACAACGAGTTCAGGGACCTCAGCGACAACCACGTCGGGATCGACGTCAACAGCCTCGTCTCGGTCAACTCCACCGACGCCGGCTACTACCCCGACGACGGCAACGGCGAGTTCCGCAACCTGACGCTCATCAGCCACGAGGCGATGCAGGTGTGGGTGGACTACGAGGGCGGGACCGGGAGGATCAACGTCACCTTGGCCCCCCTCAACCTCAAGACGGGCAGCAGGCCGGCGAGGCCGCTGCTCTCGGTGGTGCACGACCTCTCGGCGGTGATCCCCGACACGGCGTACATCGGATTCTCGTCCTCCACGGGCCTGGTCAGCTCGCGGCACTACATCCTCGGATGGAGCTTCGCCGTGGGCGGCCCCGCGCCCGCCATCGACGTGGCCAGGCTGCCGAAGCTGCCCCGCGATTTCCAAAAGCCAAGGTCCAAGGCCATGGAGGTCATCCTGCCGATAGCCACCGCCGCGCTGGTCCTTCTAACCGGGACGGCCCTGGTTCTCCTAAGAAGAAGGCAGCTGAGGTACAGTGAGCTGAGGGAGGATTGGGAGGTGGAGTTCGGCCCGCACCGCTTCTCCTACAAGGACCTCTTCCGCGCCACGGAAGGGTTCAAGAACAAGAACCTGCTGGGGGTAGGAGGGTTCGGGAAGGTGTACAGAGGAGCTCTTCCGGCGTCCAAATGCCAGATCGCCGTCAAGAGGGTGTCGCACAGCTCCAAGCAGGGCATGAAGGAGTTCGTCGCCGAGATCGTCAGCATAGGGCGGATGCAGCACCCGAACCTCGTTCAGTTACTCGGCTACTGCCGCCGGAAAGGTGAGCTGCTTCTGGTCTACGAGTACATGTCCAACGGGAGCCTTGACAAGTACCTGCATCCTCAACCTCAAGACGGAGACAAGCAAAATGGTGCTACTCTCAACTGGGCTCACAGGCTTGGTATCATCAAAGGGATTGCGTCCGGACTAATCTACCTCCACGAGGAGTGGGAGAAAGTTGTCGTCCATCGGGACATCAAGGCCAGCAATGTCTTGCTCGACGCCGGCATGAACGGCCGGCTAGGCGACTTCGGGCTCGCGATGCTGTATGATCACACCGCGGACCCGGAGACCTCGCACGTCGTTGGAACCATAGGGTACCTGGCCCCGGAGATCGGCCGCACCAGCAAGGCGACGATCCTCACCGACGTATTCGCCTTCGGCATATTCGTCCTGGAGGTCATCTGTGGGAAGAAGCCCATCATGCAAGATTCAAAGGATGATCAGCTCATGCTGGCAGACTGGGTGGTGGGGCACTGGAGCAGAGGGTCACTGGTTGAGGCGGTGGATACAAGGCTCCAAGGTGAGTACGACGATGATGAGGCGTGTGTGGTGCTCAAGGTGGGGCTGTTGTGCTCCCACCCATTCCCTGAAGCAAGGCCGGCTATGCGGCAAGTGTTGCAGTACCTGAATGGTGATATGCCGGTGCCGGAACTAGTGCCGGCGCACCTAAGCCTCCAGATGTTGGCGTTCATGCAGAATGAAGGTTTCGATTCGTACATCATGTCGTATCCTTCGTCGGTGGAGAGCGTTAACAGCTTCACTAGCCTTGTGCAACAGAGGTAGGATATGGTGTTACCGTTGGTTTCTTTGTATTCCCCTTTTTTTTTACTAGCAAAAGGGCCCGTGCGTTGCAACGAAAGAAAAAAAAATATCACACGCTTTTAATCTTTTTATAATCATTATGATTTATTAAAATAATAAGCTAACTAACTAATATAGTCAGTCCTATCCTATTTTGTTGAGAAATCAACCCGTTCATTGTTAATTCCACCATGATTAGAAATTGACCGGGACAAGCAAAGCAAAACAAAGAGGCTACGTGAATTGATCAATGAACTGTTATCTTATTTCACTCATGGGTAGAGAATGTGGGATCAGATGACAAACTGAAGGTGGTGTTCCATTCTCTCTCTCTACAACAATGCAATCTTACATTCAATACATTCATTTATCAGCAAACAAATTCTCACAAAACAAATTTTTTTGCCGGCGCTTGGCACACGTTTGGAGGCATGGGGAGGGGATCTCACCAGATGATGAGTTCGTGCCGGAGGAGGGGATACGATGAGGAGAGCAAGGGTTAAGCGCCTTTATCAGGCCATAAGGAGTCGCCGTTGCCGCGCCATAACCTCGGAGTTCCGCGTGTAAGCCATGGAGGCCCGCCTCCACCTGCAAGTACTTCGCTCCGCCGCGCCTTATCCGCGCGCCGTCGCCGTTCTGCATCGAGCAGACGCATCATCCCAAGTCGCTGTAGCTGTCGCGTTGATATGATCCAGAAGTTGTGCTCGAGCGCCGAAACTGTTGGGGAACGTC
>HvleckRLK99
ATAAGATAAGAAGAGTTGGCGGTACTGAGGGAGTATGTAATTGGAATCTGTGAAAAAAATTATATTTAAGAACGGAAGGAGCATGTAACTGATTTTGTAGATATTTGCGGATTTTTCTATCGACTTGGTCAAACTGTATTTTTTTTTACTTGAAGAAATCCTAAAACTTCAGTTATTTTGAGTACCACACAAACACATATATTGGAAATGATAATATAAGAAGAGTTGGCGGTACTGATCTTTCGGACCGATCGAATGTGGTCCTTAGACCGGACTTTTATTATACTCCACACAGCGACGGCTGAGTACACTTGTTTGCAGTTGGCGTCGTCATGGTAGCTCCATCCATGTTGACTTGGACTGATTGGCTGACTCCATTGGTCGTTTCCTGCATTTTTCTCCCGCGGGCAGCAGGCCTGTGGTTCACCTTCGTTCTCATCCACGTTCAAACATACACGTCGCCGTCGCCCGCCGGACTAGCCGCCGGCCGGTGGTCATCGGTTCACACCGCTGCGCCTGCATGCGTGCCTTGGGAGGACTGAAAGGAGTCAAATAATTAATTAATACGACTACTCCGTTGATGTGATTTTCAGACAACCTCGCGCAGACGCATTCTCCTACAGCTAAAGGTGCCTCGTCACTTCATCACTTCAGTCTTCAATCCACGAATGGCGATGATGCACATGTTCTTCCTCCTGATCCTCTTCCTCTCCGCTGGCGTCATCCTTCCACTTCCGCCCGTCGTCGCCGCTGCCGACGCCGACGGCGAGCAGTTCGTCTACACCGGCTTCACCGGCTCGAACCTCGTCCTCGACGGCGCGGCCACCATCACGGCGACCGGCCTGGTGGAGCTGACAAACGCCACCACCCACCAGAAGGGCCACGCGTTCCACCCGGCCCCCCTGCGGCTCCGCGGGTCACCGGACGGCACCGGCACGGTGCGGTCCTTCTCGGTCGCCTTCGTCTGCGGCATCGTCTCCAGCTACACCGACTTCAGCACCCACGGCCTGGCGCTCGTCATCGCGCCCGGCGTCAGGAGCCTGTCGGCCGGGCTCACGGACCAGTACTTCGGCGTCACCAACGCCCAGAACGACGGCAGCGCGGCCAACCACCTGTTCGCCGTCGAGCTGGACACCGTGCAGAACATCGAGTTCCGTGACATCAACAACAACCACGTCGGTGTCGACATCAACGGCCTTACCTCCGTGGTGTCCCACGAGGCTGGCTACTACGACGACCGTAACGGCGGCGGCTTCCAGAATGTAAGCCTCATCAGCCGTGCCGCGATGCAATTCTGGGTGGACTACGACAGGGTGACCACCCAGATCGATGTCACCATGGCTCCACTTTGGATGGCGAGACCCAGCAAGCCGTTGCTCAGCACCACCCAAAACCTGTCCACGGTGCTAGCAGTGGAGCCGTCGTACATCGGCTTCTCGTCGTCGACGGGACCGGTGAACACCCGGCACTACGTTCTTGGTTGGAGCTTGGGCATAGACGGACCTGCCCCGGCGATTGACGCCGCCAAGCTGCCAAAGCTGCCGCAGCTGGGGCCCAAGCCTCGCTCAAGAGTCCTGGAGATAACCCTGCCAATAGCAAGCGCCGTTGTCGTCCTCGCCGTCGGCATCGCCTTGGTTCTGCTTGTGAGAAGGCGGTTGAGGTACACGGAAGTGCGGGAAGATTGGGAGATGGAGTTCGGGCCGCACCGGTTCGCGTACAAAGATCTTTTCCAAGCCACCAAAGGGTTTAAGGACAAGCACCTGCTTGGTGCAGGAGGCTTCGGCATGGTGTACAAGGGGGTGCTTCCGGCATCCGGAGTAGAGATCGCCGTGAAGAAGGTCTCCCATGGATCCAAGCAAGGGGTGAAGGAGTTCGTCGCGGAGATTGTAAGTATTGGCCGCATCAAACACCGTAACCTCGTGCAGTTACTTGGCTATTGTCGGCGAAAAGATGAGCTCATTTTGGTGTACGATTACATGCCAAACGGTAGCCTGGACAAGTATCTATACGGCCATGGAGATGGAGATGGCATGACCTTGGATTGGGCTCAAAGGTTGCATGTCATCAAAGGGGTCGCTTGTGGCTTACACTACCTGCACGAGAGGTGGGAGAAAGTCGTCATCCACCGAGACGTCAAGACAAGCAATGTGCTCCTAGACAAGGAAATGAATGGACGGCTAGGTGATTTTGGGCTTGCAAAGTTATATGAGCATGGCACCAACCCACAAACAACACGTGTGGTTGGAACCACGGGGTATCTAGCACCGGAGTTAGTGCGAACAGGGAAAGCCACCCCTTTAACCGATGCTTTCGCCTTCGGAACTTTCATGCTTGAGGTAGCTTGCGGACGACGACCGATCAAGCAAGACAAGCAAGGCAACCAAATCTTGTTGGCGGACTGGGTACTTGACCACTTGCATAGAGAGTCACTCATCGAGGCAGCAGATCCAAGGTTGCAACACGAGTACAACTCTGATGAGGTGTGCCTAATTCTCAAGATTGGACTGTTGTGCTCACACCCATCTCCCTCTGCAAGGCCCATGATGCAACAAGTATTGCAGTATCTTGATGGCGAATTGCCACTCCCGGAGATGACACGCACAACTTTGAGCTTCAACTTGTTAGCTCTCAAGGAAAGAAAGGAGTTGCAATCCATGTCGAGCCCATTCTCATCGACGGCGATGACCGTCGGCACCATATCTGACCTCTCTGGCGGAAGATGATACTCACGATGTTTGATATTAATATATTGTATCATGTATTTTCTAGAATTCTTAACACCTTATTTAAATAGTATTATGATGCTTAAATATTAGGTGACCTTGTTAACGTATTACACTAGTGAAAACGGGCCTTTGGCCGGGACCCTTTAGTCCGGCCTGCCTCTGGGCCGGGACTAAAGGCCCGACCACGTCGCCCCA
>HvleckRLK100
CACATCCGCCGCGTCGGTTATATTAAGAGAAGAAAGCAGTAGTACGCCGGCGGAACACACCGGTTCCGCCGTAACGTACTACACAACCCTCTCACCTCTCATGTCTGTCATGAAGCTCATCTGCTTCTTCCTGCTCGGAGCTGTAGGAGCACTTGAGCTCGTATCCAGCGTGGACGACCAGTTTGTGTACTCCGGTTTCGCCGGCGCCGGCCTCACGTTGGACGGCTCGGCTACGGTCACGCCAAGCGGCCTCCTCGAGCTCACCAACGGCACGCTCCAGTTGAAAGGGCACGCCTTCCACCCGGCTCCGCTCCGCTTCCGTGAGCTACCCAACGGCACGGTGCGGTCCTTCTCCGCTTCATTCGTGTTCGGCATCCTCTCCGCCTACCCCGACATGAGCGCGCACGGCATCGTCTTCGTCGTCGCCCCCACCACGGATTTCTCGACCGCGCTGGCGAGCCAGTACCTGGGCCTGGTCAACGTCCAGAACAACGGCCACGAGAGCAACCGCATCTTCGCCGTCGAGCTCGACACCTTGCAGCAGGACGAGTTCCGTGACATCAACGACAACCATGTGGGCGTCGACATCAACGGCCTCATCTCGCTGCAATCCAGCAACGCCGGCTACTACGTCACCGGCGGCGAGAAAAAGGAGCGCTTCGAGAACTTGACGCTCATAAGCCACCAGGCGATGCAAGTGTGGATCGAGTACGACGCGGGGAGTAATCGGATCAACGTGACCTTGGCTCCGCTCGGCGTGGCCAAACCTGCCAAGCCGCTGATGTCGGTCACCTACAACTTATCTTCGGTAATCGCGAGCACCGCATACGTGGGGTTCTCGTCGGCGACGGGCTCATTCGACTCGCGACACTACGTGCTTGGCTGGAGTTTCCGCATGAGCAGCACTAGTGCTCCGGCCATGGACATGGCCAAGCTGCCGACGTTGCCCCGTGAGATCCCCAAGGCTCGGTCCAAGGTCCTACAGGTCGTCCTCCCAATTACTTCTGCAGCAGTCGTACTCGCTCTGGGCACCGTCATCGTTCTCCTGTTGCGTAGGCGACGAAGGTACACCGAGCTACGGGAAGATTGGGAGATCGAGTTCGGGCCGCACAGGTTTCCGTTCAAGGATCTGCACCGCGCCACCCAGGGATTTAACAGCAAGAACCTACTCGGCGTAGGGGGTTTCGGCCGAGTTTACAGAGGTGTTCTTCCAGATTGTAACATGGACATCGCAGTGAAGAGGGTGTCGCATGACTCCAAACAGGGCGTCAAGGAATTCATCGCAGAGGTTGTCAGCCTAGGACGCCTGCAACACCGCAACCTCGTGCGATTGCTCGGCTATTGCCGGCGCAAGGGGGAGCTCCTTCTGGTGTACGAGTACATGCCCAAGGGAAGCCTTGACAAGCACCTATATCTATATGGTCACCAGGACGACGACAAGCCAACTTTGAACTGGGCTCAGAGGTTTCACATCATCCAAGGGATTGCATCTGGCTTGCTCTACCTCCACGAGGAGTGGGAGAAGGTGGTGGTCCACCGCGACATCAAGGCAAGCAACGTGCTCCTGGACGACAAGATGAACGGGCGGTTGGGTGACTTTGGCCTGGCGAGGCTGTACGACCATGGCACCGACCCGCAAAGCACGCATGTGGTTGGCACCATAGGGTACATAGCTCCGGAGCTGGGGCGCACGAGCAAGGCAAGCCCCCTCACCGACGTGTTTGCCTTTGGGACCTTCCTTCTCGAGGTGACCTGCGGGCGAAGGCCCATCTTCCAAGACGCGCGTGGCAACCAGGTTATGCTGGTGGACTGGGTACTTGACCACTGGCGTAGAGACTCGCTCGCCCATGCAGTTGACACCAAGCTCCGAGGTGACTATAACGTTGACGAGGCATGCCTCGTGCTCCAGTTAGGCCTGTCATGCTCGCACCCGTTCGTCAACGCAAGACCCAACATGAGGCAAGTAATGCAATACCTCAGCAATGAGGTGCCACTGCCGCAGCTCAGGTCCACCAAAATGAGCTTTCAGACGCTTGCAATGATGCAGAACGATGGTTTTGACTCGTACATTCAGTCATCATATTCGTCTTCCAGGGCAAGCTTTTCCACGACTTCTGTCATCTCGTGAGGAAGATAACACGTATCCTCTGTCTTCCAACAGTTTGGAGAAATTTTGAGTTTGCATTCGAGTTGCATTCACGGCCCTCACAAAATTTAGATAGCCAAGGGAGCGTGCATCGTCTTGTATGTGTCGTCTGGACAAATACAAGCTGCGAAAATAAAGGATTGGCACAACCTCTTTTATTAAGGGGGTTAGAACATCTACAGCCGCATGCACCTAATTCGGTCTCTCAAATGTTAAATGACATGCCCGGTCAGTGATAAGCATGTCCGTTTTTATTTTATTTTTTCTCTTCAAAACAATTGAGTCCCT
>HvleckRLK101
CTCCCTGCAAGTCATGGAGTACATAGGATATTTCTTCTTCACAGTTCACACCAACATGCTTCACACACAGCCGACGAATGTATACTCAACTCCAAAACAAAACATTTCCTGATTTTAGCAGCCGAGACGACGCACTGTCAAACCAGGCTCCAAGCAACAAGGAAAAATGTCCTCCCTTGTACTCCTCCTGACGATCCCCTTGGGCCTGAACCTCGCAGCCTTGATCACCACCGCCAACGACCAATTCATCTACTCCGGATTCAGTGGCTCGAACCTCGCCGTCGACGACACCGCCACCGTCACGCCAGACGGGCTCCTGGAGCTGACAAACGGCACGGCGTACCAGAAAGGCCACGCGTTCCACCCGGCCCCGTTCCGCCTCCGCGACTCCACGGCCAGCGGCAATGGCAAGGTGCGGTCCTTCTCCGTCGCCTTCGTGTTCGGCATCGTCTCCGTCTACCCCGACTTCAGCGCCCACGGCATGGCCTTCGTCATGGCTCCGCGGAGGAACTTCTCCGATGCTCTTCCTGCCAAGTACCTGGGCCTCACCAACGTCCACAACGATGGCAACGCCAGCAACAACATCTTCGCCGTGGAGCTGGACACCATCCAGAGCGTGGAGTTCAAGGACATCAACGCCAACCACGTCGGCATCGACATCAACGGCCTGCAGTCCCTGCGGTCATACAACGCCGGCTACTACGATGACAAGAGCGGCGAGTTCCGAAGCATGAAACTCATCAGCCGCGAGGCCATGCAAGTGTGGATCGATTACCACGGGGAGAGGAAGGAGATCAACGTGACACTGGCCCCCTTCGACATGGCCAAGCCTGCTAGGCCGCTCCTCTCAGCCAGCTACGACCTCTCCACGGTGCTCACTGAGCTGGTGTATCTCGGGTTCTCAGCGGCGACAGGCCGTGTGAATTCGCGGCATTTCGTTCTTGGTTGGAGCTTGGGCGTGAGCACAGAAGCTCCGGCCATCGACATGGCCAAGCTGCCCAAGTTACCTCGGGTTGGCCCGAAGCCTCGGTCCAAGGTCTTCGACATCGTTCTACCAATAGTGACGGCAACATTTGTACTTGGGTTGGGTGGTATCATTATCCTGGTCATGCGGAGGAGATCAAGGTACACTGAGTTGCGGGAAGATTGGGAGGTCGAGTTCGGGCCACACCGCTTCTTGTACAAGGATTTATTCCGTGCAACCGAGGGATTTAAGGACAAGCATCTGCTTGGCGCAGGGGGGTTTGGAAGGGTATACAGAGGTGTGCTTGAGACATCTAAGCTGGAGGTTGCAGTGAAGAGGGTGTCCCACGAGTCAAGACAGGGGATGAGAGAGTTCATAGCTGAGATTACAAGCATCGGCCGCATCCGACATCGCAATCTTGTGGAGCTGCTCGGTTATTGCCGTCGAAAGGGTGAACTCCTTTTGGTGTACGCCTACATGCCCAACGGAAGCCTGGATAAACATCTATATAACACTAGGGAGGGCCAGCCTACTCTGAACTGGGCTCTCAGGTTTCAGATCGTCAATGATGTCGCGTCCGGCTTGCTTTACCTGCATCAGAGGTGGGAGAAAGTGGTCATCCACAGAGACATCAAGGCCAGCAACGTGCTCCTGGACAAAGACATGAACGGCCAGCTTGGTGACTTCGGGCTAGCGAGGCTGTACGACCATGGGGCAGACTCGCAAACCACGCACGTGGTCGGCACCATGGGCTACTTGGCTCCGGAGCTGATACGCACGGGCAGGGTGTCCCCTCTGACCGACATGTTCGCCTTCGGCATATTCCTTCTTGAGGTTGCATGCGGGCAGAAACCCATCAAGGAGAATGCGCAGGGCGGACAGATAGCGCTGGTGGACTGGGTGCTGGAGCATTGGCGTGATGGTACGCTCATGGAGACGGTGGACGCGAGGCTCCAGGGCGGGTTCGACATCCACCAAGCAGGGCTGGTGCTCACGCTAGGGCTCATGTGCTCACACCCTCTCGCTAGCGCGAGGCCTGCCATTGGACAGGTCATGCGCTATCTCGCAGGTGTTACGCCGCTCCCTGAGCTCACACCAACAGACGTGCTCACCTTGATGCAAAACAAGGGGTTTGACGAATCCGCCATGTCGTATCCGGATCTGGTGTCGAGCTTTGGCACAATTTCCACCCTCTCAGGAGGAAGATAACTTCAGGGCTAGTAGTTTAATTCACGGCTTTTACAAGTTTTATTACTACTGTATTATGCATGTGTAGTGCCACAAGTTAATTAGTACAACTGTAAACCCAATAATTATCCTTTGGCCGCAATACACTTTCAAATTACCTTGGCCAACATGCAGGAAACTATAGTGTTCAGAACTCACAACTCAAAACAAGGGGACATACGATGTTTTTCGTCCACTATTTTGTTGCAATATACTCC
>HvleckRLK102
TCGACAAGTTGAACTGTTCATGATAACATAAAAAGATGTCTCGGGATTAGCCAGTCGTACTCGTACAGCGATTAGCACGTCATTTGCCCCAAAAAAGTAAAAAAAGAAACCTCATTTGCGAGGCAAGGTTCTTTAGTCACCTGGACTGATGGTTCCATTCTTCGTGGAAATACAGCCTCAGGGTCAAAATCAGTACACTCCCGGCACATTAGGTGCGGAAGCCAAGTAGCCAACCAACCATGAGCGTCCTTCATCTGCTCCTTATCTTGGCTCTTCATGTCCTTCCCCTCGCATCTCCGGCGGTCGACGTCGACCAGTTCACGTTCGATAGCTTCGCCGGCGCGAACCTCTCGCTCGACGGCACGGCCATGGTCACCCCAGACGGGCTCCTGATGCTCACCAACGGCACGACTCAGCTAAAAGGACACGCCTTCTACCCTTCCCCAGTGCGGTTCCACGACGCCGCAAACGGCGACGCCTCCTCCTCGCGCTCCTTCTCGACAGCCTTTGTGTTCGGCATCCTCAGCGAGTACGACGACCTCAGCAGCCCCGGCCTGGCCTTCGTCGTTTCCAAGGGCAAAAACTTCTCCACGGCGCTCCAGAGCCAGTACATGGGCCTGGCCAACGCGGCCAACAACGGCAACGCCAGCAACCACTTCCTGGCCGTCGAGCTGGACACCATCGTCAACGCCGAGTTCGGGGACATGAGCGGCAACCACGTCGGGGTCGACGTCGACGGCCTCTCATCCATCGTCGCCGACAACGCGGGGTACTACGAGGACGGCACAGGCGCGTTCATCAACATGAGCCTGTTGAACCGCACGGCTGCGCAGGTGTGGGTGGACTTCGACGCCCGCACCTCTCTCGTTAGCGTCACCATGGCACCCCTTGAGTTGCCCAAGCCTAAGAAGCCCCTGCTCTCCGCCACCGTGAACCTCTCGTCGGTGATCCAGGACAAAGCCTACATTGGCTTCTCGTCATCCACCGGCGTCGTGTCGAGCCGCCACTACGTGCTTGCCTGGAGCTTCAAGATGGATGGTGGACAAGCCCCGCCGCTAAACATACAGAAGCTGCCGGCCCTGCCGTTCACGATCCCCAAGCGCCGGTCGAAGATGCTGTATATCTTATTGCCGATAGCATCGGCAGCGTTGGTGTTAGCACTGGCCATCGCCGTCGTCGTGATTGATCGGAGACGGCGCAGGTATGCGGAGCTGAAAGAGGACTGGGAGACGGAGTTCGGTCCGCACCGTTTCTCATACAAGGATTTGTTCCACGCCGCCAAGGGGTTCTCCGACGAGCGGCTGCTTGGCATCGGCGGATTCGGGAGGGTGTACAAGGGCGTGCTTCCGACGTCAGGGGCGGAGGTTGCAGTGAAGAAGGTGTCGCACGAGTCGAGGCAAGGGATGGAGGAGTTCATCTCTGAGGTGGTCAGCATCGGGCAGATCCGGCACCGGAACCTCGTCCGGTTACTCGGATACTGCCGGCGGAAGCGTGAGCTCCTGCTAGTCTACGAGTATATGCCAAATGGCAGCCTCGACAAGTTTCTGTATGACCACAACACGATGGTCTTGAGTTGGAGCCAACGGTTGGGGATCATCAACGACGTCGCATCCAGCGTCTTGTACCTCCACGAGGACTGGGAGCAGGTGGTTCTGCACCGCGACATCAAGGCGAGCAACGTGCTTCTGGACGCCGACATGAACGGGCGGCTAGGCGATTTTGGCCTCGCGAGGCTGTACGATCACGGGACCGACCCGCACACCACGCACGTGGTCGGCACCATGGGCTACCTAGCGCCGGAGCTCGGGCACACCGGCAGGGCCTCCAAAGCGTCCGACATCTTCGCCTTCGGCGTGTTCATGCTGGAGGTCGCGTGCGGGCGGCGACCCATCTCCATCTCCCAAGACGAGCACGGCGATCACCTCCTGCTGGCGGACAGCGTGATCGAGCACTGGCGCCAAGGAACGATCACCGACGCCGTGGACCCGCGGCTCCGAGGCGACTTCCCTGTGGAAGAAGCGAGATTCGTTCTGAAGCTGTGCTTGCTGTGTTCACACCCTCTGCCCAACGCGCGCCCGGGCATTCGGCAGATCATGCAGTTCCTGAGTGGTTACACGCGGCTCCCGGAGGTGTCGGTAGAGCACCTGAGTGTCGACGTGCTAGCGCTGAAGCAAAACCAGGTGGTTCGCTCGCATTCATCTTTGCCGTCAACGGAAGCTGGTAATATGTCTGATATTCCTGGAGCGAGGTAATAAACAAAAGAATTAACCAGGTGGCTCATCCGTTCATGGGAGGAACCGAACGAAACTTGACTCTAAAATGTTTTTTCTCCAAGTACAGTCTGAAATGGACACGCCACGCGACCCAACGCGGGGCCCAGATGAACGTTTGTCCATTTTCTATTCGTTTCCGATCCATTTTCAGTTTAAATTTGGTTTTGTTTTGAGATGAAACGGACATCGCGCGCACGCCGCGTG
>HvleckRLK103
ATCCACTGACGACCCACCAACCCGCAGCCTCCTTATTTGTACAGATGCATGCACACCACGACTCCCTCCATTTCTCCACCACCTGGCCTGCCCACATCTCTCCTCTCTTCCTCAGTTCTCCTCCCCTCCTGAGAAAGCGAGGACTCAAACCCATGGCGCACTCCCGCCGCCGTCAACGCGCCACCACCAGCCTCGCCGTCCTCCTCCTGCTCTACGCCATCTCCGTATGCTCGCTCCTCCCCGCCGCCCGCGCCCAGGCCACCACCTTCACCAGCATCGTCGGCGGCAAGGAGTCCATCACCTTCTCCTTCCCCTCGTTCGACAACTCGCTGCGGCAGCTCCCCGGCAACCTCACCGTGCTGGGCAACGCCACCGTCAACGGGAATGCTCTGCAGATCACGCCGGACACCAGAAACGACCCGGAGAGGTTCCTCATCAACCAGACCGGCCGGGTCATGTTCCCCCGGGCCTACGTGCTCTGGGCCTCCGACGCGTCCAACTCCAGCGCCGACGGCCGGCGCGTCGCCTCCTTCTCCACCGTGTTCAAGGTCAACCTCTTCCGCGCGAACGCGTCCGTCAAGGGCGAAGGGTTGGCGTTCCTCATCGCGTCCGATGGCGCCGCCCCCCCGCCTCCCGGCAGCCACGGCGGCTACCTTGGCCTCACCAACGCGTCCACCGACGGTAGCGCCGCCAACGGGTTCGCGGCCGTGGAGCTGGACACAGTGAAGCAGGCCTACGACCCCGACGACAACCACGTCGGCCTCGACGTGAACGGCGTCCAGTCCAAGGTCGCCGCCTCCCTCACCCCCTTCGGCATCGACCTCGCGACCAACAACACCGACGACGACGGCAGCCACATGGTCTGGATCGAGTACAACGGCACGTCGCGGCACGTGTGGGTGTACATGGCCAAGAACGGGAGCAGGCCCGCCACTCCCGTGCTCAACGCGTCGCTGGACCTCTCGAGGGTCCTCCTCGGCAAGACGGCCTACTTCGGCTTCTCGGCGTCCACCGGCGTGCTGTACCAGCTCAACTGCTTGCACAGTTGGGACATGACGGTGGAGCTTCTCCCCGACGGCAGCGGCACCGGCAAGCAGCCGCTCTCCGGCTGGAAGCTCGGGCTGGCCATCGGCGCGCCGTGCGCCTTCGCCCTGGCGCTCGGTCTGTTCGCCGGCCTGTACATCAAGAGCAGGCGGAGGAGGATCGGGGACGACTCGAGCTCGATGGTCCGGAGCACCATTAACTTCGCCAGCATCCCCGGGGTGCCCAAGGAGTTCGACTACAAGGAGCTGAGGAAAGGGACGGGCAACTTCGACGAGAAGATGAAGCTGGGGCAGGGAGGGTACGGTGTGGTGTACCGCGCCACCGTGGTCGGGGAGCACGGGCAGAACATGGAGGTCGCCGTGAAACAGTTCTCCGGGGCCAACACCAAGGGACAGGAGGACTTCCTCGCCGAGCTTAGCATCATCAACCTCCTCCGCCACCGCAATCTCGTCAAGCTCCTCGGTAAACAACTGTTTCTTTAATTCTCTGCTCTGCACATTTCGCAACGTTCTTGATCAATAAAAATATTCCGTTCATCGCAGCCCCGTAGCTCTTTATAGTGCTTTTGATTCAAAGATTCTGCCAGAAACTGCATCATGGATGTCACTCAAAAATATCATCTTCATTCTAGGATGAGTCTCATTAGTTTTGCACTTCGGTTATGATTAAAGTAGACTAAAAAGAGGTTGCCTAAAGGGTTACGTGAAAGCGAACTTTTTATTTTTTATGCGAAAGTGAAAGCAAACCTTTGATTATGTCAAAAATTTGGTTACGTGAAAAACGAGTTGTAAATGTCAAACGCCGTCTATATAGATAGACGACAAAGGTAGGGGCATTTTCAGATTACGAATCAAAGGATAACGATGCAATCGAGATACTGATGGTTTAACTTACGAATAGGGACAACTACTCCAAGAAATTAGTTCTACTAGTACACTAGACTAGATTTCAAGTTTGCACCCAAGTATCTACTCCTATGACTAACCAGTTCCTATCTAGTGAAGGTTTGTTGCTTATATGATATGATTTGGGATTCCGGATCATGATTGCACTACCAATTTGACGACGCAATATTTGACCCGTCTATTAGTACTTCACATGCTCTACTGGCTTTGGAATAATAAAACAGTCTGAAGTAGTATACTAGTAGTACTAGACAACCTTGTCGCTAGAACAAAAATAGTCTAATTCTCTAATTAGCTGTTCACAATTCTGGAAATAAATCGATTAACCGCGGATGGTGAATTTGCAGGCTGGTGCCACCAGGACGGCGTGCTGCTGCTGGTGTACGACTTCATGCCCAACGGCAGCCTGGACAGGCACCTCTTCGGCGGGCCGGAGGCCCCGGTGCTCACCTGGGGCCAACGTTACAACATCGTCGCCGGCGTGGCCTCCGCCCTGAACTACCTCCACCACGAGTACGACCAGCGGGTGATCCACCGCGACATCAAGCCGTCCAACATCATGCTGGACGGCGCCTTCAACGCGCGTCTCGGCGACTTCGGCCTCGCCCGCGCGCTCGAGACCGACAAGACCTCCTACACCGACAAGATCGGCGTCCCGGGCACGCTGGGCTACATCGCGCCGGAGTGCTTCCACACGGGCAGGGCGACGCGGGAGTCGGACGTCTTCGGCTTCGGCGCCGTCATCCTGGAGATCGTCTCCGGCCGCCGCATCTCCTGCAGCAACGCCGCCGGGTGCAGCCAGCTGCTGGAGGGCGTGTGGCAGCTCCACGGCGCCGGCGGGGGCCGCATCCTCGAGGCCGTCGACAGGCGGCTCGTCGCCGGGGGGTTCGACGAGGGCGACGCGGAGCGGCTGCTGCTGCTGGGCCTCGCGTGCAGCCACCCGAACCCCGGGGAGCGGCCGAGGGCGCGCGCCATCGTGCAGATCCTGGCGCGCTCCGCGCCGCCGCCGGATGTGCCGGCGGCGAAGCCGGCCTTCATGTGGCCCGCGCTGCCGGTCGTGCTCGGGGACGACGACGGGGAGACGCCGGTGTCCGGGACCAGCACGGCGCTGACCTCCTCATCGTCGTACTACGCCTCGTCGGCGGGGTGGACGACGCAGAACTACCTGCTCACCAGGGAGCACGACGTGACGGACAGGGACATGTCCACGGCGTGAGGTGAGCGCCGGCGAGGGCGAGCCTGCCGGCCGCCATGCGAGGACGTATGAGTGAGTCAGTCAACGGCACGTGGGATCAAGATCAACAATTAGTTGGTCGTGTGTTCATGATGGTGAGCTCGTGACACCGACGTGGCGAATAAGATGTAGATAGTGATCAGTGTGCATGCTATATATGTCTGGGTTGGGGAGCTATAGCTTTTCATTTCTGGATTAAAGTGAGTAGTACTCCTACAACTTTTATCTGATCTTTTCGTTGATTGCCCTTTTGCCGTCGTGTCCAGTACTCCAAGTGCGGCTGTGTGTAAATAGCTAGCCGACTTCTCGGTGTTTTTAATGAGAGGTGGCCAGTTCTCTGTGCTGGCTTTTTTTTTTTTTGCGCAGACTCTGTGCTGGCTTTCTTTTAAAGTGAGTAGTATAAGAGTTGATATTTG
>HvleckRLK104
TTTTTGAGTAGTTCCACCTTCCTAGCCACAAACAGCTTTCCGGCGATGACCAACATGAAGCGGGCGTCATTCCTTCCGCCCCTCCTCCTCCTCCCCCTATTTGGCCTCGCCGTCGCAACCTTTGCCGCCGGCGATGACCGATTCATCTTCTCCGGCTTCACGCAATCCAGCCTAGCCCTCGACGGCAGTGTCGTGGTCACTCAGGGCGGCCTCCTCGACATGTCCAACGGCACAAACAATGTCAAAAGCCACGCTCTTTACCCCGCTCCTTTGCACTTCCGCAATTCATCCGACGGTAAAGTGCAATCTTTCTCGGCGGCCATCGTCTTTTGTATCGTCGGCGCATACCCTGGCGTGAGCGCTAACGGCATGGCCTTCTTCATCGCTCCAAGCAAGAATTTCTCGGACGCGCTGCTGACGCAGTACTTTGGGATCTTGAAACCGAACAACAATGACAACCTCTTTGTCATTGAAATCGACACCTTCCAGAACCCCGACATCCAAGACATCAACGACAACCACATCGGCATCGACATCAACAGTGCTTTGTCCTTGCAATCCCACGCGGCTGGATTCTATGAGGACTCCAATGGTGCCTTCAAGAACCTGACGTTGAATGCCCAAATAGAGCTGCAGCTGTGGGTGGACTATGAGGAGGAAGGAACAAGGATCAATGTGACCTTGGCTCCACTTCATGTGGGAAAACCCTCGAGGCCATTGTTGTCTGCAACCTATGACCTCTCAACCGTGCTCACGGACACGGCGTATATTGGTTTCTCATCCACGGCTGAAATTATGAACACCCGTCATTATGTTCTTGGATGGAGCTTTGGCATGAACAGGCAAGCAGCTCCGTCCATTGACATCTCCAAGCTTCCAAAGGTGCCGCGTCTACGACAAAAGGCCCAGTCCAAGCTCTTGGCGATTATCCTCCCAATAGCCACTGCAGCACTGATCATCTCTATTGGCACCGTTGTCATTCTGACGGTGCGAAGGAGATGGAGGTATATGGAGGTGCGCGAGGATTGGGAGAGCGAGTTCGGTCCACACCGATTCTCATACAAGGATTTATTCCATGCTACTCAAGGATTTAAGAGCATGAACCTAGTTGGAGCAGGAGGGTTCGGAGAGGTATACAAAGGGGTGCTTAAATTGTCCAAGAAGGAGATCGCCGTCAAGAGAATGTCCCATGAGTCAAGACAAGGGATGAAGGAGTTCATCACCGAGGTTGTTAGCATCGGCAAGCTGCGGCATCGCAACCTAGTGCAGCTACTTGGTTATTGCAGGCGGAAAGGTGAACTGATGTTGGTGTATGACTACATGTCAAATGGTAGCCTCGACAGACTTATACACCATCAAGAAGACGGCAAGTCCACCTTAAATTGGGCTCAGAGGTTTCAGGTCATCAAGGGTATTGCTACCGGCTTGCTCTACCTCCACGAGAAGTGGGAGAAAGTCGTGGTCCACCGAGACATCAAGGCAAGCAACGTCCTCCTCGACGATGAAATGAACGGGCGGCTCGGGGACTTTGGCCTCGCGCGGTTATACGATCATGGCGCCGATCCACAGAGCACACACATGGTCGGCACGATGGGGTACCTTGCCCCCGAGCTAGTGCGCACGGGCAAGGCGTCCCCTCGCACCGACGTGTACGCCTTCGGCATGTTTCTTCTTGAAGTTACATGTGGGCAAAAACCTATGAAGCAAGATGCAGAGGGAAACCAGGTTTTCTTGGTGGACTGGGTCCTGGAGCACTGGAACAACCGAATGCTTAGCAAGACGGTGGACGCACGGCTCCAGGGTGACTACGGCGTTGACGAAGCGTGCCTCGTGCAGAAGATAGGACTTTTGTGCCTGCACCCGTTTCCTGGTTCAAGGCCTAGCATGCGGGAGGTCGTGCAGTACCTCGACGGCGAGACCCCGCTGCCGGAGCTGAAGACGACGCAGCTGAGCGTGGACATGCAGGGGTTGATGCAGGACAACGGGTTCAGCACCACCGTCATGTCTTATCCCCAGCTCATGTCCAGCTTCGGCGCAGTGTCCGACCTCTCTGGTGGACGATGATATTCATGGTGTTTATGACTGTTCTCGTCTTGCATGTTCTAGCTTGGCATACAAGTATTATCAATTAGATGCTCACATATCTCTGCACTTATGCTTACTATTATTGGATGGGTTTTTCAGAGGAAATCTTTTTTTTTAGGAATTTGGAGAGGAATCCATCCTCGTGGAAAATGCATGTGATCCTGTTTAAGAAAACATATATTCTATTTCTAAATAGCTACAACCCTTTATAGACATGCAAGTGTGACACATGAGCAACTCATGCATATAAATCATAAATTACATTGTTTTTTCATTACTCTATGCATGCAAGCACCACATCATTAATTCATGCATGTTACTCTTAAGTTATTTTTTGCATTAGATTTTGTATTGATAATATATGTGTTGATCGCATGTATCATACATATCTAGTTCATATTTACATTATTGTTAAAAATGACATTCTTTTTAC
>HvleckRLK105
CTTGTTTCCTGAATTTCTTGGATATGGAGACCAGAGCTGTAAAATGGGACCCACCTGCCATTCATGTTTAGGAGAAAATCATGCATGGGCATGGCTAATCGCCTAATCCTACTGACCAGATATGGGATATCTCTTTTGGAGTAGTATTTTCCAAGTGTCCCATCCATGGACTTGGTGATCTAGAAAGGGGAGCAGGTGCTAGCAAGGTTTATGTGAAGAAAAAGCAGTGCACTTTAGGCTACATGCTACATATATAGAAAGAAAAGATATGTACATGAAACTCATGGTGCTTAGAAAAATGCCTAGGCAGTGCAGGGGCCATTGACAACCTTGGCTGCTTGTGGCAGCAAGTCCTCCATGCCATCATGTTTGCCTGCCCAGGCAAGCAACCAATTGAAACCAATGCCCTTGGTTATAGACACAAGTTAACTCTAGGGTGAATGGAGATGTCTCCCACCATTCATTAGACTTTCAGAGCTCAAGGCTCAAGCTTAATTGCTTAATTAGCAGCAACCCCATGCCTTTGGCCATAGACACAAGTTATCTATCTAGCTAATAGGGTGAACTTTTCAAAAAAATAAAAAATCTAATATGGTGAAAGGAGATGTCCCCTAACATTAGACTTCAGTGCATGGTGGTAGCTCAAAGATTAATTAACAGCAAGCAGTAGATTCCCCAGCAGCATAGGCCCCACACCTGGTGGGAATCCGGACACAAAACAGGTAGGTGCCCAGTAATCTAAATAGTGCAAGGCTGGATCGAAGAAGACACAAATGTCAATGTAAAGCACAGTCTTCCCTTGCCTCGAATGAATAAATATATTATGCAAAGCGCAGTCTTCAAGTTTAGGAAGCATCCAGCTGCGTTAATGAAGAGGTAAAGGTGGTCATTTTCCTTGCAGAAATCTTCAGTCTACACGCGTCTTCCTTGCCAGCTTAGCACTTTTGGCAAATCTGACAGGTTCTAAGCCCTTAACTAACCACCCTGGCTAAATTACCATTACCAACAGGTTTGGGTGAAAAAAGAGCGGCCGATTTTTGCAAAGAAGAGAAAAGGAGAGGACTTACTGAGGAGATATTACTACCAGATTACGAATCTCACTGACAGTACTACTACTACCTCCGTCCCATGATATATTTAACTTGCAAAAACTTCTTATATTGTGAGACGGAGGGAGTACTTGATAGATTATGGCATTACGATATTGACATGTTACTAAATTGTTAATTCATGTATGTCGGCGCCAGTGAGTGCTACTGTGTGAGTGCCCTGGTTCATCAATGCTGCCCGTTCACTGCAAGCAGATCTGGCAGCGATTCAAAATCAAGCAACCAGACTACTGTTGAGAAGCAATGCTTGCCCTCCCACTTAATGCTGTTCTAGCTGGAGAATTAATGGAGTCGTACGAGCAATACACCGGGTTAGTACTGATATGCATGCATGCATGCATGCTTACCTGTGGCTAGGACATCCAGTGGTGCTCTTCATGTTGTCAATGAATGCCACAGATCGCCACAGGGGCAGGCCAATCCGTTATGATAATTAGCATAGTTGTAAAGCATACGAATGTAGACATTCACTAACTGGTAATCTGGTATACCTTTTTCTTTTGCTTCATATGAATGAGTGATATATATATGTATGTAGCATTGCAGTTTGACAGGGTTTAGGAGCATACGATTGTTACCTTCATGGTGAGAGTGGGACCCCTGCCACCTGTGTTCTCCTGCAGCGTGGTCAAAAGCAACAGGGATTAGGGATAACACTCATGCTACAGCCTTCAGTAACAGGGCATTCCTTAAATTCATAGCTATATGACTTCCAATGCTTGATTAGCACTGGAGCAGTAGCAGTACCAATTTACCTTTGTCCCCAGGCCGGTCTGCAAGACAAGGGCATGAGTCAAATCATGTTGCTTCTGCCATAAGGATACTGCTTCACGGTCTCCCCTCGTGGCCGCGTGAATCCCGCATCCGCTGTCTTCTTTGGTTTTGACAGAATTGCACTCCAAGAACCTGCACTTCTGCTCAGTTTTACTTTAGATATAAGCAAGACAGAGTAACTCACTGAGACAGTAAAACAGAATACCACTCACACAGAACAGGGTCAGCAAGAAGACATCCTCCAGAAAAACAATATTTCAGACAACCTAACAACTGGTCAGTAAGATATCCTACTTGAAAAATATTATCAAACGCAATATCATTCATCGGAGTGAAAAGATTCTTCATTGGTGATATATGGTGAGGGCATATATGGCAGACCAGAAGTACAGACTTCTGAAGAGCACACATGGACGCCATTTTTATTCAGAATGGTACAGACAGTAAAACCAAGGGCAAGTTGTTCGATGGTAGCAAAGTTACATCTTCCACGCGTACAGACCCAACAAAACCCACGGCTGCTGCAATTTCGGCAAACTAATACGGGTTCTTTTTTTGTCAGGTAAAAGGAAGGGGGTTCTCTGTCTCACACTTCGATATTTTGTGGAGGAACTTGAACAAACAATTTATGAATATCATGTACTGGCTTCCGTGTCAAGTGTAGCTCTGACTCCATCCAGAAATGTAATCGGCTTGATACCGAGCGTCTGAGTTAGCTTGGTGATATCCATGGATATGTCTGGCGGAGAAGCTACACCCCGGTTAACCTGGATAATGATAAATGGATGGGGCCATTAGCCACTGATAAAGGGTCATATGACTACACGATGCTTCAAATGAACTCATTTCAGGCAAACAGGTTGGAAACCTAAGACATAAATGAAGAGCAAAGAAGCTAGCGCAACTGCAAAATTAGTTCAACCTGTAAAGTTCGTCACTGTTCTATAGTATTATATTGTGAACTATGACTATCACTGAAAACAGTTCAGCTGAGCAGAGGCAAAGGTAGAGTTCATACCGATGATGCAGGCACAGATTTGATTATCGACTTGCTATATCCACGAACTTCAGCAACAGACTCAGCCATCTGCAGTCTTGAAACCCTATCTGCTCCGCCTACATTCAGAAGTACCCGAATCTTTTTGCCATCTGTAAAATGTGCTTTACTGTCAGTGCAACTGATAAACGAATAACAAATAATAGAGCAATTTAAGACGCAGAGAACAATATTAAAGTAATTAAATGAAAACTGGAGTGCAATTTAGAAAGAACAGATTACAGCAATTTACCACTATCCTATATAAAACGAACATTTGTAACGACTGAACTCCATAAAATTTACTTTAAATTCACGTTTTCATACCTGATAACCAACTTTTTGTTAAAGACAATATTACATCCACTATATCTTTTACATAAACCGGGCAGCGGTACTCATCATTAAAGAAATCAACTTGTTGGCCTTGTGAGAGAACATTATCCATCCACTGCAACCAGAGCACGCAGTTTCTAATTAGACACTACATTCTGCAAGTGTTCTCCAGTCAAACAATTTTGTTTTATTTCAAAATTAAGAAACAATGTCAAGAACTCGACCTGCGTTGGGGCGGTTGCTTATCTTACCTGAATAGGGAGAGACTTCTCCACAGGAGAGACAGTTTGTGGCCCATAAATAATGCTGCTTCTCAAGATCGCATAGTTTGAGCATTTATCAGTAACGAACTTCTCTGCAGCAACTTTTGATTTGCCATACATGTTCACTGGCAGTGTCTCATCCCCCTCTTTGTAGAAGGATTTCACCCCTTCATAAACTGTTGCACATGAGTTCCAGATCGATTAGATTTGGAGTTGGCACAAAAGATAGCATCCTAGTAAAAAATAACATAAATATATAGTTATGTACTATGGATCAGGCAATCAACAAGGTATAACTTTGGTAAGCTCCTCATTTGCCCTTGGCTTAAGCTCATCAAGATAATAAAGTAAAACCTAAAGTAGGTTAAGTAGTAGTGCTAATTACCAACAAATATAAATGCAAGTGGATGCATGCTTGTTTGTAAATTCGGGCAAACGGCGGGTGCCAAATATAACAGTACAAATGTATCACACATCAATTCAGAGGAGTGCTCTACCTTGATCTGTGGAGAGATGAATCAAAAGGGTCTTGTCATTCCCGAAGCTCAGTGACCAATCGACAAGCGAAGAAGGCACATTAGTAGCCATGGCAGCAGCTGGGTCCATTTCGCACGCTCGAGGAACCGAGATTGCAGCACAGTTCACAATCACATGTGGCTGAACAGGATAAGCATTAACACTCCCAGTTAGAGGACAGCTATGGGATTTTACGAACCCAAGTATGAAAAGAGCAAGAGAGCAGCAATACACAAGGTTTGATGAAACAGTTGCGGATAGTCCAAAAGTGTTTCAACACTTTATAAGAAATAAGTATCACCCAAGTATGTAAGAGACAAGGAAAAATTATGCAAGCACGCAAATCGATCTCCAGATATTACGCTCTGATGGTTGAACAGTGCGGGCATGTAAGAACTAAGAACGAATCACCAAAAATCCACTGTGGAAAATTAACAGTGGCACCGTCAGCTGGGCACTGCAATAAGCCATGTTCTTGGCATTCTGAATGCACAGTTTACTCCCCGGAAATTCAGTTGAACTACTTTACAATAGCGCATTGCAGTCAAACTGAACTGTTTCTCACAGCTACAAAATAGTGAAACCATTTGAGAACCTAAAGGCAAGAACATTACTAGTTTACTACAAACTTATCAAAGAGAAAATTCGCTATTGGCCTGCATGTTACAATGTCCATTGCACTGTGTTGCAACCCTAAACCAGAGGTACCAGAACCAGACAAGTTGAGCCAATTGCTCGTGCGGGTCGAGATAACGCTAACAGTGCCAGACTGAAATGTTAATGGGCAAGCAAAGTGCGAAAGAAGAGCGTGAATCCACGGGGAATGGCGAACGGCAATGCTGTCTCTGTCTACGAATTTGTGGCGGCGCCATCTGGTCGTGGACTGCGGCGCCGGTGGTTAGGCAATCATCGGAGTAGCTGTTCTGCTGAGAAACCAAGCGAGCAAGCACTCCCAGTGCCGGCCGGCCGCAGCTTGGCGAAAATGGTGTTGGACGAAATGCAATTCACGGTCAGACAGCACGCACGGCAGCAGCGAAATGGGGGCGCTCGCGGAATGGGGAGGGGGCTGCAGGTACTACCTGGCCGAAGGACTCGGAGACGGCCTCGAGGCCGTCGCCGGAGCGGAGGTCGGCGCGAAAAGCACGGACCCCGGGGAGCGCGTCGAGCAGCGCCCGCGGCGCCGCCCCGCGGTGGTGGGTGAAGGCCACGTCGACGCCGACGCCGTCGCCCCCGGTGGCCAGCGCGGCGAGGAGGTGCTGGCCGAGGTAGCCGCTCCCGCCCACCACCAGCACCCTCCTCCTCTCCATCTCCGATCTGCCACTACCGACGGCCAGCGAGCGAAGCGAAAGCAGTTGGGTGGGTCCCGCCTGTCAGTCACCATTCGTCCAGCTGGCCCGCGTTCAACGCTTGACTCCGTGACCTGAACGCGGAAGCGTAATCCTCTTCCTCGAAGGCGGAAACCGCTCTGGCTCTCTCCATCTCTCCACAAGTCCACATCGCTAAACCTTCCGCCGTCGGCGCTAAACCCTACACACCCTCGCCGCCGCCGTCGCCGTCGCCGGAGAAGAGTCGGGGATGGGGGGAGGGCCGCGGACGTTCGCGGGGGGGCTGTCCAAGTGGCAGCACAAGCGGATGCACGAGAAGCTGGCGCGGGGGAAGGAGCGGGGCCTGCTGCGGCACGAGAAGCAGCTCTACCTCGCCCGCCTCCGCTCCGAGATCCGCGCCTCCCACCTCCCCGGCGCCCCCGCCTCCCCCGCCGACCACGCCGGGCCGACCTCCTCCCGCGCCCACATCCGCGCCCTCGCCGACCGCTTCCTCCGCCCCGGCGCCGAGGACCTCTGGAACGACGACGACGGCCCGCTCCGCCGCGCGCGGCTGCCCTCGCAGCAGAAGAATGCGGCGAGGACCCTGCCGTCCGGCGCCCGGATGGTCGACTGGAAGCGGGTGGAGTCCGGGGAGAGGCCGAAGCCGCCCCGGGGAGGAGGGGACTGGAAGGACTGGGAGGAGCTGGATTCGGGGGAGCCGAGGGCCGGCAGGGGAGCCGGAAATGAGCAGCCGCGATTGCCGGCCGCGTTTAGTCAGAGGAGAGGGTACGGGACGGTGGCTCCCTGGTGGTGGCAATGGAGCCCGGGCTCGGGCACACCTTCGCAGAGGAAGGAGGCGTCCTTCGGCTTCTTCGGCCTGAAGAGATGCTACTCGGCGATGCCTCCACTCTCACCGCGTCAGGAATCGGGTGCCGCGCTAATGCCGTTGGGTGTTCGACAGCTCTCCGAGGCTGGGGGTGGCACGAAGGGGACACCGCCGGCTCTGTTCTATGCTCAGGAGAGGTTGTACTCGGGAGCAGCCCCGCGGCGGTTTGGCCAGAAATGGAGGCCGGATTCATCGGACGAGGATGAGGAGGTCATGCCACCTGCAAAGAGGGATCTGAGGTTGGCGAAATTCGTGGCTTCAAGGGAAGATGAGTCGGAAGATGATGAAGTGGGGGAGACGAGCGCCATCAGGAGGAAATGGAGCAGTGCTGCTCTGAGGAACTGCGATATGAAGAGAGATAGGAGGCCGCTCAAGTCCTACGAGGAGGAAAGCGATGATATCACTGGCAGAATCCAAGAGCTGCGAGAGGAGATAAGAAATAGGGAGGTGCTGGGTGCTGAGAGGCGGCGCTATGAGTCGAGGGGTGAATCTGTGTTTACAAATAAAAGGTCACACTCTGACCGTTATCTCTGATGTTGTTTATTTTCCTCGTAACCAATTGCCTCATTTGTTTTGTGGCCTGCTACCTTTGTAAGAAGTAGTGTCTGTATGGTTGAATTAGGAAAAATCAACTAAGAAGACTTCAAATATGTAGTTCTTGATATATGAGTCATGAGATCACCGAAGTTGCCCCCTTATGAAAGTTTCTTTTTGTTAGTCGGCCACTGGTCTATGAAAACATGAATTGGCCACCCGTAATGCAAAAGATAGACATGATGTTTGTAGCACATCCTGCTTTTTTACATGCCTTCTAACTCAAGATTAATGAATGGTCGGTGAATTAACTTCTTCAAATCACACTCCATACTACACTGCAATAGTGATTGTGCCCATCTTATTGGCAAGTTATGATATTTCTTTTTTCCTTAGATTTGATGAGTTTGCATCACAAGTCATGTTCCTGTTTTATATTCAGATTCGATGAATGTGGCATCTCCCCACTTACTGTCAAAGCACTCACTGATGCTGGATATATACATACAACCGTTGTCCAGGAAGCAGCCCTTCCAATTTGTCTTGAAGGTATTATATCTTATTTCACTTTCCTCGTGAACGAGTTTCCTGAATCATGGGGGAAAATCACAACCTTTTGGCGGTAATATCATGGGATGTGTTGCTTGACTTCAGTAGTTTGTATTTAGCACTTGACTCCAGTAGTACCATTTTGGCCGTGCATGAACTATCTGAAGATGCTATCACCGAAACCTTGCAACGATCAGGGGATTGATCCTCACTCATCACTGTCTAAATGCAGGTAAAGATGTTCTTGTCAAGGCCAAAACTGGAACCGGCAAAAGTGTAGCTTTTCTGGTAATGTTCATTTGCAAGAAGTTACTTTGGGATGTTGTTCCTTTCGATTTTGTTGTCCTTCAACAAATTTATTAAAAGCAATGAGTTGATAAACAGCTTCCTGCAATTGAATCAGTCTTGAATGCCATGAAGAGCCATACAAATCATCGAGTGTCTCCAATATTCGCCCTTGTTCTATGCCCTACAAGAGAGCTTGCCGTCCAGGTTACAGCTGAGGCAAATGTTTTGGTGAAGTACCATCATGGAGTGGGTGTTCAGTCTCTTATTGGTGGTACTAGATTCAAGCTTGATCAGAGACGGTTAGAGTCTGACCCATGCCAGGTCTGTAGCATTTACTGAGCTACTAAAGATCAAGTCTAAACTCCTAACTGGTGGGTTGACGATATGGTGGGGTTTTCCCTTTTCAGATTTTAGTGGCAACACCTGGAAGGCTGCTGGATCATATTGAAAACAGATCTTCATTCTCTGTCCGCTTGATGGGGTTGAAATTGCTTGTATTGGATGAAGCTGACCACTTGCTAGATTTGGGTTTTCGCAAAGACATAGAGAAGATTGCTGATAGCTTGCCACGCCAAAGACAGACACTACTATTTTCAGCTACTATTCCAAAAGAGGTAATGCAGTCAGCATAGCATGTAGCATGAGTGCCTTTCTTGTATCATAATCTATATGTTACCTTATTTATGGATAACCATTGGTCTGAAATGGGAATAATGCTTGTCATTCTTTAATGGCAGGTTCGAAGGGTTTCACAGATGGTTTTAAACAAGGATCATGTTTTTGTTGATACAGTGGGCTTGGGAGCTGTTGAAACTCCTACTAAGGTTTCTATTTCTACTCCAACTCCAGTAATATTTGGCACCAATAACAAACAGAATAATCTTCCATTAGTAGCTGCAAAGTACTTCCTCTGTAAACAAGTGTAACACGTTTTAGGTCACTAAAATAGTGATCTAGAATGTCTTACATTTGTTTACAGAGGGGGTACTTATTTCATTCTGTGTCCTGCGAGTAAAGAGTATTAAGATTGATATTCTCACTTTGCATTTACCTTATCAGGTGTAGGCAGTCGATGTGCTAATGCCATGAAGTTCTATTGCGTCATTCTATTTAAGAAAAGGACCACATTTAGCAGTTTGTCAGTTTGACACGTAGTTCAATTTTCAATGGAATTTTGTTATGCAAAAGATATATACCGTGTCTGTCATTATCACACTTTGTATGATAACAAAAGCAGCCCTTCTCAACAAATTTGGTCTGCAAGTAAAATATTGTGATCCTGTGATATAGCCTTTATTCTCTTCTTTGTTATGACTTTTTCTGGTAGAATATTGATCCCTTGGCATCTCCTGCTCTTGAGCTTAGGTGCAGCAGCAATATCTTGTGGTACCACATGAACTACACTTTCATATGGTTCATCGCCTTCTTCGAGAGCATATTGATCAGGAAGTGGACTATAAGGTCCTCCCTCCTCTGCCCGTATCCCTCAATTAAGCAGTGTGTTTGCGTAAAATTGCAATTTATTAAATTACTAATATCTTTCCATTGGATTGCAGGTAATTGTTTTCTGCACAACAGCCATGGTTACTGAATTTATGTATATAATGCTTCGAGATCTGAAGCTAAACGTCAGAGAGATACATTCAAGAAAGCCTCAGCTTTACAGAACACGTATATCTGAAGAGTTCCGGGATTCCAATCGCCTGATTCTGGTAACATCAGATGTTTCAACACGTGGAGTGAATTATCCAGATGTTACCCTAGTGATTCAGGTAGAATTTCTTTTCCTTTTGATGGTTAATACAGTTGAGGAAATTTCCGAGCAAGAACATTTATCTGCCTAGACTAAAGCAACTGCAGGAGTGGCAGCTATCTCTTTAATGTCATTACTTTGCATGGTTGTCTTCACCATTCCTGCTCTAACCTCACATTATGATTGTATTAGGCTGGTGTTCCTCCTGGCAGAGAGCATTATATTCATCGTCTTGGAAGGACTGGAAGGGAAGGTAAATCAGGGAAAGGAATTCTGTTGATTGCGCCATGGGAAGAGTATTTCTTGAACGAGATACATGATCTCCCAATAGAGAAGGCTCCTGTGCCACAGATTGATCAGGAGATGAAACAAAAGGTTTGACCTGGCATACTTGTTCATAGTTTACGTTTCAGCGTTATATGCATACATTCTTGTCTGATTATTTTCCTGAATTTTCTGCTACTGCAGGTTGATGATTCGATCAAGATTGTTGACATGAGCATCAAGGAAGCCGCATACCATGCATGGCTTGGTTACTATAACTCGATAGCTGATGTTAGCAGAGACAAAGTCATGCTTGCTGACCTGGCAAGTAGGTTTGGTGTCTCTATCGGCATGGAAAAGCCTCCGACGCTGTATAGGAAAACCGCCTTGAAGATGGGGTTAAAGGGTGTGCCGGGAATTCGGATAAGAAAATGAATAACCAAGTTTTGTCTCCCATTCTGTAATTCGTCTTATTTCTAATTTTCACTACATCAAGTTTGAAAATGATCTATGTCTTGTCGACTGGCTCAGACGAAGAAGCACTCTCACATTTTTCCTAGAGCCTTACACTCATCTGAATGAGCTTTAGTCGACTGTGACAGATGAATGTTAGGCATTATTGCCATATTATCCAGCCTCTTACTCTTGGGGATGTACTTGCCTGCAGCCAAAGTGCCTCTTTGAGGGTTCACATAAGTAATACCATGCTCGTCTCTCATGTAAGATGGACTCTGTAAATCAATGTCTCTTCGGTAGTAAGCTTGACCAAAGCTAAATAGATTATTTCTCTGTTTATGACAAGCCTATCCATGAGAGCTTAAGGCTTGTTCTTTAGGTTGCTTTGCAACATTTAAGAGGGAGGAAATACTGGAAACTGTTTGTAGCCACTCGTCTCTGCTGACTTGTGGCTTTTGTTCTTATAGACAGGAGGCCTGAGGATTGTGATTACACTGTTGATGTCCTCACTTGATATTCTGTAAACAGAGAAAGAAGAGGAAAGAAGACTGGCGATTATTCTTCTGAAAGACGATAGAGAACTGGTTGTTAATTCTCAGGTTATTTACTTTTTCCAGCCTCAACAGTTAACCTGTTACCTCCTAATGTTTTATCACATTGCAAATTGGTTGGTTTCTTTTCTCTAATCCTGAGTTGAACTGAATAATAAACAGACTGATGGACTAAGCAGAGTTCGGATGCACCTAGAACCTAAGGCATGTAGAAAGCCCGAGAAAACACCTCGAGGAAAATTGAGGAAGTGCTTTCAAGGTTTTCTAAAGATGGGGATACTACCATTGGATTCAGAAGGAGATGAGCTCAAGGCCAGAAAATGAGTTCTTCGTAGGCTGGGGGTAACACATCATTTGACGCACTAAATGATGTTATCGTTTGCATTCCTTGCTCGATCCTTGGAAAACTTGCAAACTCAACTTTCTTGTTACGGGATGTTTTGTGAAGTAGGCAGCCTTGCATCTTCGTGTTGCTTACATCTCGAGCCTTTTGCTGTCCTGGACATCAGGCTGGATTCTAGGAAGTATTTTTTCTTTGCCGAAATGTTTTAGGGTAGCAAATGACATGTGCAGAATGGAACAAACAACGTAACTAGGCCGACACCATTTTTTCTGAAGTCGAGTCGTCGACAACCAACGATAGTGCCACTTCTGTCTCCAGCTGTGGCAGCGAAAATTATAAATATCCTTTAGAAACAATTTCTATGTATGTATGACAGTCAACTTTTGTGATGCCCTGTTGCCTTGGGCGAACAAGCTTATTCAGCTTAATTCAGTTTTCTACGCTTCTATCTAAAACTATGAATCCAATCTGAACTTTTTATTGATCTAACAATATCAGTATTAGGGTCTAGCTAACCCAAAAAATATGGATCTAACTAAATTCTTTAGCACAGGTCCAAAATAAAGATTGGTGATAAGCTTGTATGATGATGTGAGCACCACAACAGAAATATCACCCTTCCAGAAAGAATGGTCACAATCGTAGCTGAAGATGTAGATAACACGTGATCAATCTCTTCATCCTTATGTCCATTAGTGACTAGAGAAGCCGGCTGGAAGTCTGCAAGTCTGGCTACCCTGGAAAAAAAAAGGAAAAAAAAAGGACGCATACCTGGCAACTTTCATCGGGGAGACGGGGATCACACATACATATGATAGGAATTTCCCTCTGGATGGCGATGGCCATGGAAAAGAACTCCATCTGGTAGCCAGTGACAAAATACTGATATTAATGAGTTAGATCGAGTCGTCGAAGACCGACGATAGTGCCATCTCTTGGTGGAAAACTGTGTATTTAGGAGCTAATTTGATAGATAAGTTTTTGTGATGCCTTGTTGCCTTCGACGAAAAAGCTATCCAGTAATTCCGATTAATTCAGTTTTCTGCCACTTCTAACTAATATTATGAATCTAATCTGGTGGAAAAAGAAACTACGGGTCTAACAATATCAGAGTATTAGTGTCTAGTTTGTTTCTGATTTGTGCCCACAAAATTCTGTCTAATTGTTGCAAATTGCAACTAGAGTTTTTCAGCCCTTGGTTAAGCAATATCGTGACACAAGTTCATCGGATTCCTTGTGATGTAACGATGCCTAGTGACAAATATAAATTAATTAACATATCATACCCATTAAGTTTTTTAGCAATGATTACATGGAACAGGTTCAACGCAAAAACACAAACTACTCCTTCTGTTCCTAAATATAAGTCCTTTTAGAGATTCCACAAGACGACTACATACGAAGCAGATTGAATGAATCTACGTTCAAAAATATATCTATATACATCCGTATGTAGTCCTTTAATGAAACCTCTAAAAAGACTTATATTTAAGAACGGAGGGAGTACAATGTAATTCTGGCCTTGCCACCCACAAAAATGTTAAATCTCGCAAACTTGTGCACACATCATAGACTGAAACACGATGACTTGCAGAGATCCAAAATAAACATTGGTGATAAGCTTGTATGATGATGTGAAGACCGCAGCACAAGTGTCACCTTCCAGAAATAATGGTCACCGTTGTGGCTGAAGATGCACATACCGCCTCATCAACCTTTTCATCCTCGCGTCCACCGGCGACCAGAGAAGCCGGCTGAAAATCTACCAGTCTTGCACCTCCTTCCAAGTACAGCATGACTAGACGCATACATGGGCGCAACCTGGACAGCGAATGGGAGCACAGCAATCCAAGCTTCAGCACAAGCTCAACCTCCGTCGTGTCGTAATCTTTCAGCTCGGAATCCACGGCGTCGATGATCGAGCCACCCTGCCACGTGCCACGTACCCAATCCGCCAGCGCAAGAAGGTCGCCGCTGGTGCTGGCCGGGCCAATTGGTTTTCTCCCGCAGACCACCTCTATGATAAACACTCCAAATGCAAATACATCGGTCGCCTTGGTCGCCTTGCCGAGCCGGGCCAGCTCAGGGGCAATGTATCCCCAGGTGCCCGCCACATGTGTGGTGTGGGCATCGACTCCATGGTCATGCAGCCTTGCGAGGCCAAAGTCACCAAGCCTCCCATTCATGTCGTCGTCGAGGAGAACGTTGCTCGCCTTGATGTCTCGATGGATGATGACTTGCTCCCAATCCTCGTGCAGGTAGAAGATGCCGGAAGCTACGCCTTTGATGATATGAAGCCTCCGAGCCCAATCCAGGGTCGGCGTATTCTTGTCATACAAGTACTTATCAAGGCTGCCATTGGGCATGTAGTCATAGACCAAGAGCAGCTCCTGCTTGTACCGGCAATAGCCTAGCAGTTGGACCAGGTTTCGGTGCCGGACATGTCCAAGGATGGCGATCTCTGCCATGAACTCCTTCTTCCCCTGCTTTGATTCCGGCGACACCCGCTTGATGGCCACATGCTGTGTGGTGGTAGGCAGCACCCCTTTGTACACCCTTCCAAAGCCTCCTTTCCCAAGGAGCATCTTATTGCTGAAGCCTTCGGTGGCAGTCACTAGATCCTTGTATGTGAAAGACGGCATCCCACATTTGATCTCCCAATCATCGTCTTCCTTTGCCTTTCTTAGATGCCGACATATCAGAACAGCAAGAACTATTAGGAAGACTGCCAGTACAATCGATGGTGCTCCTCTAATCAAATAGTTGGGGCCATGGGATTCGAACTCTCGAATGGACAGTACAGTGTAGTCAAGTGGTTGAGCCACCCCATCTAGCTTCAGACTCCAGCCTAGAACATAATGGCCAGAGGAGCCTTTGCCGCTGGATGCAGAGAACCCAGCATAAACTGGACCCAGTGACAACAAAGAGGACAGATTGACAGTGGTCGACAGCAATGGAATTTGGGGTTTAGAGATATAACAAGGTGCTAAGGTAACATTCAGCTGGTGTGATTTGCTATCATAGTCCACCCATGATTGAACTGTTTTTTCGCTTTCGAGTACAATGGTTTGGAACTCGCCGATGTAGTCATAGAAGCCAGCAGTTTGGGATTCAACTGAGACCAAGCTGTTGAAATCAACCCCAACATGGTTGTTATCGATGTCCCCGAACTCAGGATTTAAGACGGTGTCGAACTCGACAGCGAAGAAAACATGGACATCTGAGTTAGAATAGGGGAGGCCAAGGTACTGGCCTGGCAAATTATCAGGTAGGTCACTGGTGGATGAAAGCATGAAGGTCAGCCCATTGCCTTTATGGTGATTATTGAAGTCCATGACAAACACAAACGTAGTTGAGAAAGAGGAGATAGGGCTACCAGGATGATTTTGGAAGCTTAGAGGATAGCTGCAGAAAACATGGCCGCTTGTACCACCTAGGGCACCGGTTAGACTCAAGAAGTTACCTCTCCACAAAGCTTGGCCACCAAGATTCATGTCGGGTGGAAAGCCATTATAGACCAGCTCATTGTTACCAACAATAACGTCAAAGGTGTTGAGGTGGCCGGCAAGACAGAGGAATAAGAGAACGAGGAGGTAGGGGCGCCAAGAGAGACAAAGCATTCTGCCAAGGAGGTAAACTAACTAGCTTGATCTGTAGGGCTATGAGTGAAGGAAACACTAAAGCATCTAGGTATATATATAGTGTAAAATGATAGAGGTTGAGTCGTGCTGGTAAGTTTAGGTGATTTTCCAGGTAGGTGGCAAATTCATACTGTCACGGAGAACAAATATCTGTTCACACCCCCAACGAGTTGGAGTGTAAGTGATCAGAAAAATCCAGGTTTCACTGTCAATTGATCAGAAAAATCTGTTCAGTCCCGTCCTAGACGCAACAGACATAAGTCTAAGATTCGTTTGCAACCACACACTTGGTCACTGCACACAGCTGTAGTCTTGTGTTATCTTGAACGTTTTTTTGGGTCACACAATTTCTGTACTGCCACCTCCATTAATTAGCAGGCATATACTTCAGTGTACATGTAACTCAGCCATGGACATGGGTAACCATCTTCTCCTCCTCCTCATCGTTGTCGTTAACCTCCATGCATTTATGCACACTGCCAACTGCGATGAACTCATCTTCAACGGCTTCTCCGAGGCAAATCTGAAGCTGAGTGGCCAAGCGTCTATGGTAGGCCGTGCTATAAGGCTCACTGGTGGCATCACCCTGACAGAAGGGGATGCTTTCTACAGCAGGCCCCTCGATTTCAGTAGCAACTCCAGTGGTGGTGGGACCTCCTTCTCGACAACCTTCGTGTTTGCCATCAATTCTGACACCATCGAAAACCCCTCGGGAGCTCCTGGAATGGCTTTCGTGCTCTCTTCCACCATGGAGCTGCAACATCTGCACAACAACTCAGTGGTTCAGGGCCAGCTGGGTTTCAGTGATGTAGGAGGTAACAGCTCCAACTCAGGTGACCAATTCTCCTTTACAATCGAGCTAACATACATCAATGACCACCTTGTTGAGATCGATGTTAAAAGCTTAGTCTCCGTTAACCATACCACCAGCTCCAACAGGGCTAGCAGGGCTAGCAACATGTTTGAAAGCACCAAACTTAGCAGCGCGAAACCGATGCAAGTGTGGATACACTATAATGGCACGGAGCAAATGCTAAATGTCACTTTAGAAGAATTCGATGATCATGTTGAACGGTCTAAACCGCTGAGCCTGCCACAGTTATCGTCCACTGTCAATTTCCCACCTTTGTTGTCAAACTCTGAGCATGTATATGCTGGGTTCTCTGCTGCAAATGGAAAAACATATTGCAGCCGATATGTTATTGGATGGAGTTTCATGAAAAATGGACAAGCACCACCACTAAACCCCTTGAATCTCCCTCAAGTCCTGCCAAATCCTCAGCATCAGAAAAAGCACATCCTACTCATAGTTTCCCTTGTCACTTTGGTTCCCATAGTCTTTGTCCTTGTGCTTATATTTTCCTACGATATCAGGTCGTGGTTGAAAACAAACCTTGCACATGAAAAATGGGAAATTGACTGTGGGATGTTGCAATCTTTCACATACAAAGATTTATTTATTGCCACCAGCGGGTTCAACAAAAAGGCGTTCCTAGGAAAAGGAGGATTTGGGAAGGTCTACAAGGGTGTGCTGGCTGTCCCTGAGCAGACTATTGCAATCAAGAGGGTCTCACCAGAATCAAAGCAGGGAATGAAAGAATTCATGGCTGAAATCGCAATTCTTGGTCACCTCCGCCACCGTAACCTTGTCCAACTAATTGGCTACTGCCGCCACAGGCAGGAGCTTCTTTTGGTCTATGACTATATGCCCAACGGTAGCCTTGATATGTATTTGCATAAAAAGGATAAGCCAACTCTGGACTGGGCTCAAAGGCTTCACATCATCAAAGGGGTCGCGGCTGGCCTTGTGTACTTGCATGATGACTGGGAGCAGGTTGTTATCCATCGAGATATCAAGGTGAGCAACGTGCTCCTTGATGATGGAATGAATGGAAGGCTAGGTGATTTTGGCCTTGCAAGGTTGCACGGACATGAAGCCGACGCCCATACCACGCGTGTGGCAGGCACCTGGGGTTACATTGCTCCTGAGCTGGCTAGGCTCGGGAAGGCGACCAAGGCAACAGACGTGTATGCATTTGGCATATTCCTGATGGAAGTTGCATGTGGAAGAGGGCCACTTGAGGCGAATGCCCATGGTGAACCTCTGGTGCTAGCAGACTGGGTGTTCAACAGATGGCAAACTGGTTCACTCATCGATGCCATGGACACGAGGTTAGAACAGGGCCATGTCACTGAAGAGGTAGAATTAGTGCTAAAACTTGGACTTCTATGCTCCCACTCGCTCCCCAAGGAAAGGCCATGCATGCGACTCGTAATGCAGTACCTGGAAAGCGACGCAACACTCCCAGATTTCCCCCCATGTTTTTTCACTGCTAATTCAAACAAGGATGAAGGATCTGAAGATCAGGTTGTGGCCCCTCCCTCAGCGGCAACATCTATTACAGGCCTTTCTGGAGGAAGATGAAAGATGTGGTGCCCGGTGAGAATGGTGATCAGAGATTCAGTGTATCGCCATCAAACCTCCCTACTACTACTACAAGTATTTGATGACAAAGGAGGATGCCATTTATGAGACTCAATATCACCACTCATCATAATGTATTTCTACAATAAGGTTCAATGTATGGAATAATAATTAGAGACAATATGTACCATAAATCTATATATAAAGCAAGCTTGTGACGCTCTCTAAGGCGAAGATGTTGTATTTATGTTATTTCTTCATGTGTGCTTCTTCGATTCCCCTATATTGTGTATCAAAACTCCGCAACTTCTTATGTCGAATCATAAACAGAGTTGTTACAGGACAAATTCCAAAGGGAACAAGTATGGGTGATTTGCAGCCATGTGTGGTGGCGGACGTTCGTAAATGACATAATTTGGAGTTAACCATCTACTTCTGTTTTACTGATTGCTTCACAAACTAATACACGCCAGTCCTCATTGAATGGGACGACTCAACATGATCCATAAGATGGATCATAAACTTCCTCACTGGAAACAACTCTTGACTTAACTTTACAAAGTAAATCGTCTACTTTGATCAAGACGACACTAAGGGGACAGGAGTTGTGACCCTGTGGCAGGGAGTCGCTATGTTCAGAACCTTGTTAGTTGTAGGAGTTGCAGTATTTGGATAAGTTTCTGGCTGCAGCTGTGTGTTGCTGAACTATAATAACTAATAAGGTCACTATATGTTTTGAATTTCAGGCAAAACCTGTGGGGGACAGCAGCCTGCGTTATCAGTTTCACATTGAATGAAATTGGGAGCTCTGCTCCTTGATTCGAAAAAAAGGGAGTCCTGTTCCTAAGCCTCTGATGTTATCATCCCCTCCATGACTTGGGGGCCCAATGCTGGTAGTGGAAGCCCCAAATGACATCAGTTCTGTATGCGACTAATAAAATTCAGATATAAGTCAGCAGTAAAGACAGGAAGGATTAAGGAGAAACATATGCATGCCATAAAGGCTACAAAGCAATATATATAATATACATAACAAATGTAATGAGAAAAGGTTGATAAAAGTTATCAGCAAACCTCTGGGTTTAGGGTTATCATTGAATTTGAGTGATAATCATTGTTTTCTGCCATTCTTCCCCTTCTATTTGGCTAATTTATTTTGAGCCTGCCTCAAGCAAAGCTGCAGCAGGTTAATATCTTACCTGGCATAAACGGTGAAAGGGAGGTTGATATGTAGAACAGTAGAAACTCAGTAATCCATACCCAAACTCCTCCTCACAACTGCAGTTACGAAGCAAGCAAATGGGCGCAAATTATATACCGCATGCATACAGGACATCTAACTACTTAATAGTTGGGCTGCAATGTTGCATCACCCTGACACTATCTTTATAATATTTTGTGTAGGTATGGTATATACACTTTCCCAAAACAAAAATGTTCACAGCACATACGCACAAAGTAAATAGCTTACCTTAACAAGACTTGGCAAGCATGTCAACCAAGGAATTGTACACATGGCAGTTCATCTCAGCTTACCTTAACCAGACTTGGCAAGCATGTCAACCAAGGAATTCTACACATGGCAGTTCATCTCAGACGCAGCTAGCCCTCGTGTATTTGCTTTGCAACTGAGAAGGAACTGGTCTGCGCGCGCGCAGGCATCAACACCG
>HvleckRLK106
CTAGCTTACATCATCCAGGCTATAAATACATCTCACCACACTGCTAGCTCTCCACACAGCTTAATTAGCCATGGCCGGAAGCATGAAGCTATCTACTCTGCCCATCCTCCTGCTCCTCATCACATGCCTTCCCAGCTCGGCCACCGGCAGCCAGGACCAAGAGAGCTTCCTCTACACCGGCTTCGCCGGCAGCAACATCACCCTCGACGGCGCGGCAACCATCACGCCGGCCGGCCTCGTCAAGCTCACCAACGAGTCGTTCCGGATCAAGGGCCACGCGTTCCACCCGGCGCCGGTGCGCTTCCGCGAGGCCCCCAACGGCACGGTGCGGTCCTTCTCCGTCTCCTTCGTCTTCGGCATCCTCTCCTCCTTCGGCGACATACGGGGCCACGGCTTCGCCTTCTTCATCGCCCCGACCACCGACCTCTCCGCCGCCTTCCCCATCCAGTTCCTGGGCCTCGTCAACGCCACCAACAACGGCAGCGCGACCAACCACCTCTTCGCCGTCGAGCTCGACACCATCCAGAACACCGAGTTCGGGGACATCGACAACAACCATGTCGGCATCGACATCAACAGCCTCAACTCGGTGGAGTCCAACACCGCCGGCTTCTACAACGACGATAGCAGCAGCAGGGAGGATGACGGCATGCTCACAAACATGTCCCTTATTGGGTCCGGGCCGATACAGGTTTGGGTGGAATACCATGGGGAATCCACACGAATCAACGTCACCTTAGCACCCCTCGGTGTCGCGAAACCGGCGAGGCCATTGCTCTCAACAGTCTATGACCTCTCAGGAGTGCTCACAGACCAAGCGTACCTTGGCTTCTCATCCTCCACTGGTTTAAGCACGGGGCATCACTATGTGCTTGGTTGGAGCTTTGGAATGGGCACCCCTGCTCCAGTCATAGATCCCACCAAACTACCCAAGCTGCCTTACCTTGGTCCAAGACCTCAATCCAAACTCCTAGAGATTGTTCTGCCGATTGCTTCTGCGGTCTTTGTGTTGGCTGTCGGCATCCTAGCTATCACCATGGTGAGGAGGCATATCAGGTATAAGGAGGTGCGTGAAGACTGGGAGGTCGAGTACGGCCCTCACCGATTCTCCTACAAGGATCTGTTTCGTGCCACCAAAGGGTTTAAGGACAAGAATCTGATCGGCGCAGGCGGGTTCGGGAGGGTGTACAAGGGGGTTCTTCCGAAATCTAAATCGCAGGTTGCTGTGAAGAGGGTGTCGTACGACTCGAAGCAGGGCGTGAAGGAATTCGTCGCCGAAGTCGTGAGCATCGGCCATCTTCAACACCGTAATGTCGTGCAGTTGCTTGGATATTGCAGGCGCAAAGGTGAGCTCCTCCTGGTCTATGACTACATGGAAAATGGAAGCCTCGACAACCACCTGTATGGCCAGTTACAAGGAAAGGCTACTTATTTGGGGTGGCGGCAAAGGTTCCGGATCATCAAGGAGATCGCCTTGGGCTTGCTCTACCTCCATGAAGACTGGGACAAAGTTGTCCTCCATCGGGACGTCAAGGCAAGCAACGTGCTTCTCGACAAAAACATGAATGGAAGGCTAGGAGATTTCGGCCTCGCGAGGTTGTACGACCATGGCACCGACCCGCAGACCACGCATGTCGTCGGCACCATAGGATACCTAGCTCCGGAGCTGGTACACAGAGGTAAAGCAACCACTCTCACCGATGTATTTGCCTTTGGCATCTTCGTTCTTGAGGTTACATGTGGGCAAAGGCCTATCAAGGAGGACCCGCAAGGCAACCAGCTCGTCCTGGTCGACTGGGTGCTTCAGAACTGGCACAAGGGGTCACTTGCTGATGTAGTGGATGCCAAGCTTCAAGGTGGCTATGACGCCGGTGAGGCATGCCTTGCGCTCAAGCTAGGGCTCTTGTGCTCGCACCCATTTCCTCAAGCAAGGCCCAGCATGCGGCAAGCTATGCAGTACCTCGACGGCGACGTGCCGCTCCCGGAGCTTCTGCCGGAACACTTCAGCTTCCACATGTTGGCCCTGATGAAGAATGAAAGCAAAGTTTACTCGTCCGCGATGCCGTCCTATCCTTCGCCGATGATGACGAGCTTTGGCTCAATATCAGACTTCTCAATACATGGGAGGTGATGTGCAAGCATATGGCCGCCTTCAAGTCATGATGTTGGGTGGTTATATAGTGTGTGGTGTAGTTGTACATGCATATATATTCTTAATTAACTGTACTTCCCCTTTTGTAATGGAATGGTGTAGTTAATGATGTGTGTGTGTGTCCTTAAAATAATAAAGCACTTTATATACTATACCAAATGGTATTATGTTAGACGTGTGTTACTTTATTATTTTGATGAATATGTCCACGTATTATGTTTAGCA
>HvleckRLK107
ATGGAACATCCACCCACCCTTCGTTTCTCCTTACAACTTCAAATCTTTCTCTCCTTTGTCCTAAGCCTTGCATTCCTCACCACCACCACCACCACCATCACTCAGGGTCAGGAGGAGGAGGAGGACCAATTTGTCTACTCGGGCTTCTCCGGCGGTGGGGGTACCGGCCTCGGCCTCACCCTTGATGGCACAGCCACGGTTACACCAGATGGGGTTCTCAAGCTCACCAATGGCACTCTTCACCTCAAGGGTCATGCTTTCTACCCAACCCCATGCCGATTCCGCAAGTCGCCCAACGGGGCCGTGCAATCCTTCTCGGTCACCTTCGTGTTCTGCATGGTCCCCGTCTACTCGGATCAATGCACCGATGGCATGACTTTCCTGATCTCTCCCACCAAGGATTTCTCAGGTGCACAACACTCTCAATACTTGGGCCTCCTCAACAAAACAACCGATGGCAAGCCAAGCAACCAGATTTTTGCAGTCGAGCTTGATAGCAGCCAGAATACAGAGTTCGACGACATCGATGACAACCATGTCGGCATCGACATCAATAGCCTCACCTCCACCCAAGTCCGACCGGCTGGCTTCTATGATGACAAGAAGGGCGGTGCCTTCAACAACCTGACCCTCGTTAGCCGCAAAGAAATGCAGGTGTGGGTGGATTATGATGCAGATACCACAAAGATCACTGTGACCTTGGCTCCCCTCAAGGTAGCCAAACCGTCGAGGCCACTGGTCTCAACCACCTACAACCTCTCAACGGTGCTACGAGATAAGTCCTACCTCGGGTTCTCGGCTTCAACCGGTCCGATCAACTCACTGTACTGTGTGCTTGGGTGGAGCTTGGGCATAAACCGTGCTGCACCGGACATTGACATGACCAAGCTGCCAAAGCTGCCTCGGATTGGCCCCAAACCTCGGCCAAAAGCTATGGAGATCGTCCTACCAATAGCCAGCGCCACATTCATATTTCTTGTAGGAACAAGCATAGTCCTATTGGTGCGGAGGCGTAGGAAGTATGCCGAGCTACACGAAGATTGGGAGGACGAGTATGGGCCACACCGCTTCTCGTACAAGGATTTATTCCATGCTACTCAAGGGTTCCACAATAAGAACCTACTCGGTCATGGAGGATTCGGGAAGGTGTATAAGGGCGTGCTCCCGGTCTCTAAACTGGAGGTTGCGGTGAAGAGGGTGTCCCACGAGTCAAAGCAAGGAATAAAGGAGTTCATCGCCGAGATTGTGAGTATCGGCCGTATCCGCCACCGCAACATCGTCCAGTTACTTGGTTATTGTAGGAGAAAAGGTGAGCTCTTGTTGGTGTATGAGTATATGTCAAATGGCAGCCTTGACAGGTACTTGTACGTCCAAGAAGAAGAGGACGCGCCCACTCTAGATTGGGGTCGGAGGTTTGAAATCATCAAAGGCGTCGCGTCCGGCTTATTCTACCTTCATGAGAGGTGGGAGAAAGTCGTCGTCCACCGAGACATCAAAGCAAGCAATGTGCTTGTTGATGGTGAAATGAATGGGCGGCTAGGTGACTTTGGGCTTTCAAGGTTGTATGAGCATGGCACCGATCCGCAAACGACACGCGTGGTGGGCACCATGGGGTATTTCGCCCCGGAGCTAGCGCGCACCGGTAAGGCGACGCCTCTAACGGACGTTTACGCGTTCGGCATCTTCATCCTGGAGGTGACCTGCGGACGGAGGCCAATTGTTGACAAGGGTGTGGAAGAGGATGATGGTTCAGAGATACTGGTTGACTGGGTTGTGGAGCATTGCCGCAAAGGGTCGCTCATGGAGACAGTGGACATGAGGCTGCGAGGGAGCAGCAGCGACCCCGATGAGGTATGTTTGGCGTTGAAGATAGGATTGCTGTGTGCGCATCCGTTCGGTAATGTAAGGCCGAGCATGCGGCAAGTGATGAAGTACCTGGACGGCGAGACGCCGGTGCCGGAGCTGATGCCCACAACCTTGAGCTATAGCATGATGGGGGTGCTGCAGAATGATGGTTTCAGCGACTACGCATCACTGAGTGCCACGGTTAGCAGCANNNNNNNNNNNNNNNNNNNNNNNNNNNNNNNNNNNNNNNNNNNNNNNNNNNNNNNNNNNNNNNNNNNNNNNNNNNNNNNNNNNNNNNNNNNNNNNNNNNNNNNNNNNNNNNNNNNNNNNNNNNNNNNNNNNNNNNNNNNNNNNNNNNNNNNNNNNNNNNNNNNNNGAATGGAATCACCTCCAGCTCCAGCTTCTCAGCTGGAAGATGA
>HvleckRLK108
CACGCACAAAGTCACCCAAATGGCCCAATTAGTCTTAGTGTTAGACCCTTCTCCATCCATTCCTTTCAGTAGGTAGGTTCGTGGAATGCGAGACCAACCAACCAACGCTAGACACTTCCGATTCCCTTTCTCCCAAAGAGGAACCCAGATCATCAGTCAAGTGCCAAATTAAGAGACGGTGCGTTTGTTGCGGAACTGCAAGTCTCCAGCAAATTGATGCAGAAGCCATGCTTCTCGAGCATTTCCACTTGGCCACTCTATTCCTTCTCCTCGTGACCACCGCCGGCGGCGTCGGCGGGCAGAAGTTCACCTACAATGGCTTTGCAGGCAGCAACCTCGACCTCGACGGCGTGGCCGGGGTCACGCCCAACGGTCTCCTCATGCTCACCAACGGACCCATCCAGATGAAAGGCCACGCCTTCCACCCGTCGCCGTTGCCGTTCCGCGCGGCGCGGTCCTTCTCCACGACCTTCGTCTTCAGCATCTTCGGGCAGTACATCGACCTGAGCGCCCCCGGCCTGGCCTTCGTCGTCACCACGTCCAAGGAGATGCACGCCACCGCGTTGCCGGGCCAGTTCCTTGGCCTCCTCAACACCACCAACAACACCAACCCCAACGCCCACTTCTTCGCCGTGGAGCTCGACACCCTCCTCAACGTTGATTTCCGCGACATCAACAGCAACCACGTCGGCATCAACGTCGACAGCCTCGTGTCGCGAGCTGCCGCTGACGCCGGTTACTACGACGACGCCACGGGGCGGTTCCAGAACCTAAGCCTCATCAGCCGCAAGGCAATGCAGGTGTGGGTGGACTACGATGGAGCCGCCACGGAGATCACCGTCACCATGGCTCCCCTGGGCCTCGCCAGGCCCAGCAAGCCCCTGCTACGAACCACCGTGGACCTCTCGACCGTGCTACAGCACCAGGATACGGCGTACGTCGGCTTCTCGTCGGCCACGGCGGTGCTCTTCGCACGACACTTCATCGTCGGCTGGAGCTTCGCGCTGGACGGTCCAGCGCCTACGCTAGACATCTCGTCGTTGCCCGCCCTGCCGCCTACCGGGCCCAAGCCACGGTCCAGGGTGCTGGAGATCGTGCTGCCCATAGCATCAGCGACGGTGGTTCTTGCCGTCGGCATCGCTGTTTACATCTTCGTACGACGGCGCCTCAGGTACGCGGAGGTCCGGGAGGACTGGGAGTCCGCGTTCGGGCCGCAGCCCTTCTCCTACAAGGACCTGTACCAGGCGACCAAGGGGTTCAGCGACACCAACCTACTCGGGGCAGGAGGCTTTGGAAGCGTCTACAAGGGCGTGCTCCGCAAGCCGGACATGGACACCGAGGTGGCCGTGAAGAGGGTGTCGCACCAGTCAAGGCAGGGGATGAAGGAGTTCATAGCCGAGGTCGCGAGCATGCGCCGGCTCCACCACCGAAACCTGGTGCAGCTGCTCGGCTATTGCCGGCGAAAGGGAGAGCTTCTCTTGGTCTACGATCACATGCCGAACGGTAGCCTCGACAAATACCTACACGATCCCATGCCTGGCAAGGGCATGCTGGAGTGGGCTCAGAGGTTCCACATCATCAGGGGAGTGGCTTCGGGGTTATCGTACCTCCACGAGGATTGGGAGCAAATCGTCATCCATCGAGACGTCAAGGCAAGCAACGTGCTCTTGGATGGCGAGATGAACGGGAGGCTAGGGGATTTCGGCCTTGCAAGGTTGCACGACCATGGGTCCGATGCGCAGACCACACACGTGGTCGGCACCATGGGCTACCTAGCCCCTGAACTAGGCCACACAGGCAGGGCAACCCCATCTACCGATGTCTTTGCCTTTGGTGCGTTCCTCCTGGAGGTCACCTGTGGGCGGAGGCCCATCGAGCAAGATGAGAGAAACAACCGCGTCATGCTCGTGGACTGGGTTGCCGAACAATGGCGTAAGGGTTCGATCACTAAGGCCGCAGACGTTAGGATGCCAAACAGCTTTTGCCTTGACCAGGTCTCTCTAGTGCTGAAACTCGGAATTTTGTGCTGCCATCCGTTGCACAATGCAAGGCCAACCATGCGACAAGTCGTGCAATACCTCGACGGCGATTTGCCCCTCCCTGAGTTTTCGCCGGTGTATCTCGGCTCAACCATGCTGGAGCTGATGTACAGCGCAGAGTTTTTTAACAAGAATCTAATGACATATGTGTCATCGGGTGTCATTTCTGATCTCTCCACAGGAAGGTAACACAGGTGCATGTCGTGCCAAAGTAATTGAGTTGGACTTCTAATACTTGTATACTCTTGAAAGATGTAACTAGCACTTTGTAGTGGTTTGTTTTATGCTTTATATTTATTTTTGGGTGATTGCGATGGTTTACTTTCTTTTTGTATACTCCCTCCGTTCCTAAATATAAGTCTTTGGAGAGATTCCATTATAGACTACATACAAAGCAAAATAAATGAATTTATACTCTAAAGCATGTCTATATACATCCGTATGTATCTACAGTGAAATCTCTAAAAGACTAATATTCAGAAACGAAGGGAGTAGATATTTTTTTTAAATGAAAGGGGTTTCCTCACGCCCCAACTTTCATGTATAGATGTATATTTATAACAAACAGGTGTATCATGCATGCTACCTGCTTATGCTAGATGTTCCTAACTGGTTCATCTTTATGGATGGTGATGTGCTTGCATTACTACTTGTATGTTTCCAGTGAGATCAGGAC
>HvleckRLK109
CTCAACGGCACTATTTTCATACACCAACTGCACAACGACTTTCTTGGCACAACCACCACACCGTTTAAAGTCTAGCCCATGATCACCAACGAAGCGAAACTTTGTTAGCCTATGATTCATCAGTCATACTACTGACCTTCTTCTGTCCAAGAAACTATGCCGGCCCTTCTTCTTCTCATACTACTCCTATTGTTGAGCCGGGACGGCGAGGTGGCCTCGTCGTCAGACGGTGGCCAGTTCTCATACCAAGGCTTCGCCGGCGCCAACCTTACCCTGGACGGCCTCGCCGTCGTCATGCCGAGCGGCCTGCTCGCGCTCACCAACTTCACGCAGCAGACAAAGGCCCACGCCTTCCACCCCGCCCCGCTCCGCTTCCTCAACAACAACAACACCGCCGTCTCCTTCTCAACATCCTTCGTGTTCGCCATCGTGTCGGGGTACGACGGTCTGAGCGACCACGGGTTCGCCTTTGTCGTCGCCCCGACCACCAACTTCACCACCGCGGGCGCCGGGCAGTACCTTGGCCTCCTCAACACCACCAACGGCACGCCCAGCGCCCCCATCTTGGCCGTCGAGCTGGACACCATCGTGAACCCTGAGTTCCAAGACATCAATAGCAACCACGTGGGCATCGACGTCAACAGCCTCGTGTCGCGGCAGGCCCGGCCGGCTGGCTACTACGACGACGACCGCGGCGGCGCCTTGCAGGGCCTGACACTTAACAGCCGCAAGCCCATGCAGGTGTGGGTGGATTACGACGGCCAGGCCAAGCAACTGGAGGTGACACTAGCCCCCGTGCATGTGCCAAAGCCAAGGAAGCCTCTCCTATCCGAAGCCATCGATCTCTCCACTCTCATGGCGGACGCCATGTACGTCGGCTTCTCGGCGTCGTCGGGAGTTGTCTCGGCGCACCACTACCTGCTCGGATGGAGCTTCAGCTTGGGCGGGTCTGCCCCGCCGCTTGATTTCTCCAAGCTTCCTGCCCTGCCACGCCTTGGTCCCAAGCCTCGCTCCAAGGTACTCGACATCGTGTTGCCGCTGGCCAGCGCGTTGCTCGTCGCAACGGCGCTGGCTGCGGTCTTCTTCTTTCTGTGGCGTCGGCGCCGGTTTGCGGAGGTGCGTGAAGGCTGGGAAGACGAGTTCGGCCCCCACCGATATGCATACAAGGACCTGCATCGTGCCACGCATGGGTTCACGGAGAGGAATTTACTGGGCGTCGGAGGGTTCGGGAGAGTGTACAAAGGTCGGCTTTCCGCATCCAATTTGGAGATCGCGGTGAAGAGGGTGTCGCACGAATCAAGGCAGGGACTGCGGGAGTTCGTTGCCGAGGTCGCCAGCATTGGCCGTCTCCGGCACCGGAATCTCGTGCAGTTACTAGGCTACTGCCGGCGCAAGGACGAGCTCCTCCTGGTTTATGACTACATGTCAAATGGCAGCCTTGACAAGCACTTGCACGATCCAAACATGCCAACCGTAACCTGGCCCGAAAGATTCTCGATCATCAAGGGGGTGGCATCGGGCGTGCTGTATCTCCACCAGGATTGGGAAAAGGTTGTCATCCACAGAGATATCAAGGCCAGCAATGTGCTCTTGGATGAAAACATGAATGGATGCCTTGGCGATTTTGGCCTAGCAAGGTTATACGATCATGGAACCGTTGCTCAAACAACCCGTGTCGTTGGCACCATGGGATACCTTGCACCAGAGCTTGTGCGTACCGGGAGGGCGACACCCTTAACCGACGTGTTTGCTTTCGGTGTGTTTCTTCTAGAGGTTGCATGTGGGCAACGACCGATCGAGCGTGCCCAGCGAGACAGCCGTGTAGTGATGATTGATTGGGTGCTTGAGCACCACCGCAGTGGATCTTTACTCCAGGCGGTGGATCCACGACTAGCAGGGAAGTTTGACACAGAGGAGGTTACCCTCGTGCTGCAACTAGGTTTGTTGTGCTCGCACCCATTGCCTGATGCAAGGCCTAGTATGCGGAAGGTTACGCAATACCTAGATCGTGGGCAATCTGTTCCTGACCTGTCACCGACGTACATGAGCTACAGTATGTTGGTGATGATGCAAAACGAGGGCTTCGATTCGTATGTTATGTCGTACGCTCCATCGGAGCCTAGCTGTACAACGGTGTCTTATGGGTCTTCGNNNNNNNNNNNNNNNNNNNNNNNNNNNNNNNNNNNNNNNNNNNNNNNNNNNNNNNNNNNNNNNNNNNNNNNNNNNNNNNNNNNNNNNNNNNNNNNNNNNNNNNNNNNNNNNNNNNNNNNGTCTTATGGGTCTTCGATGACGGTTCTCGCTGAGGGCAGATGAATTGTCCGCATGTATACACAGTGCTTATCTTTTACTCCGTATGTTCTTTTTGGAAAAGCTTATCTTCAAGGGCCGGTAAAAATTAATCGGTGGTCCTAGATTTTCTTTTTAAAATAATTTGTAAACCTA
>HvleckRLK110
CTCGAGACTTCACATCTCATCTGTCTCCTAGCCGAAGATATATATATTTTTGAACTTTGATTCGTTCATTTTCTCCACCCTGCTAGTGCTATCCATAGTAGCTCCCTAAGCTTCAGCTTTATTTTAGAAAATAACTTGAGTTGATAGGCTGTGATACAAATTGATTTTGCAATTTCCACCAAAATTTGGAAAGAAAGCATTAAAAAAAGATATGGAGAGAAAAGGACAACAAAATCACATCAGCCAACAACTGTACTGCCAGCTAGAACCTTGACTTGTAACTTTGTAAGAGGAGTGTGCTTGAGACTTGACTTGTCAATGTTTTGTTAATACTTCTTTTGATGCTGTAATCCACATGTAAATAATAAAACTGATTTTGACAGGGCCTGCAGAATTCCACAACAACATTAACAATAAAAAGAAACCCCGAAAAGGAGCCCGCCACTACAATCTGAATCTACTCTTTTGACCAGACTATGGAAGAAGAAGAAAATGACAGTTTTAGTGAAGTGTATCATAGAATAATTCAAGAATGACGGACAAGGACAATGATACTTAGACCTCCTAAATGAACTTGTAGTAACTAAACTACAGAATACTGCCCAGTTTTTCAAAGATGAGCAAAGCATTTTCAACAATCCACCTATGCCTGCGCATATAACCGTTTAGATTACCTTATGTCGGTACCAGCTTTAGGAAAGTGGTGCGTACCACACGGTGCATCTCCTGAAAATGCGGAATAGCTAATTTCAACAGAAATGAGATCGCAGATACAAAATTAGCTCACTAGACAAAGTACCATCATACTAAGATAATAAAAAAAGTCTATATCCAGGAATTCACAAATTTGTGTTGTCCTAGCTAGAGAGTAAAGAGCATTGTAAAGGTGCTCCCTAAGTTAATTGCATCTGGATGATCAAATTAATAATATGTCCAAAGAGACAATAACCATATAAGTAGTACTCCTATATACCAGCAGTTTCAGACAATGACTAGTATGGAACGGTAAGCAAACGATGCGAGAACTTGTGCACTGAAAGTCATGGGCTGCTATATAAGTACTGTAGTATATACTAATAGTTCCAGACAATGACTACTAGTATGGAAAAGTAGGCAAATGATGTAAGAACTTGTCCACTGAAGTCCTGGTCTGCTATTACTAAGGTGGCCATCGCTATCTGACTGCAAATAAGTTCCAGAGTAGCTAGACCACAGAGTAGAGAGACACCACCACAAGCCACCCCTCATCATCTAGGAAAAACACACTATTTATGCATCTTGTAGAGCTTTTACAGTTGCACATGTGCTAGCTAACATGGAGCATCAATCCACCCTTGGTTTCTCTTTACAGTTACATATCCTTCTCTCCCTTGCCCTAAGCCTTGCATCCTTCACCACTGTCACCGCCACCAGTGAGGAGGAGGGCCAATTTGTCTACTCCGGCTTCTCCGGCAGTACTGACCTCACCCTTGATGGCACAGCCACGGTTACACCAGATGGGGTTCTCAAGCTGACCAACGGCACTGTTCACCTCAAGGGCCATGCCTTCTACCCAACTCCATGGCAATTCAGCAAGTCGCCCAATGGGGTGGTGCAGTCCTTCTCAATAATCTTCGTGTTCGGTATGGTCCCCGTCTACTCCGATCAATGTACTGATGGCATGACTTTCTTCATATCTCCCACCAAGGATTTCTCAGGTGCACAAACCTCTCAATACTTGGGCCTCCTCAACATAACAAACGATGGCAAATCAAGCAACCACATATTTGCAGTCGAGCTTGATAGTAGCCAAAATACAGAGTTCAAAGACATCGATGACAACCATGTTGGCATCAACATCAATAGTCTCACCTCCACTGAAGCCCGACCAGCTGGCTTCTATGATGACAAGAACAACGGTGTCTTCAACAGCTTGTCCCTCGTTAGCCGCAAGGAAATGCAAGTGTGGGTGGATTATGATGGAGATACCACACAGATCAATGTGACCTTGGCTCCCCTCAAGGTAGCCAAACCATTGATGCCACTGGTCTCAACTACCAAAAACCTCTCAACAGTGCTACAAGATCAGTCCTACGTCGGATTCTCGGCTTCAACTGGTCCAATCGACTCACTGTATTGTGTGCTTGGCTGGAGCTTGGGCATAAACCGTCCTGCTCCGGATATTGATATCACCAAGCTGCCAAAGCTACCTCGAATTGGCCCAAAACCCCAGTCCAAAGTTTTGGAGATCGTCCTACCAATAGCCACTGCCATATTCATCTTTCTTGTAGGAACAACTATAATTCTTTTGGTGCGTAGGCGAATGAGGTATGCCGAGCTACACGAAGATTGGGAGGATGAGTATGGGCCACACCGTTTCTCCTACAAGGATTTATTCCATGCTACTCAAGGATTTCACGATGCGAACCTACTTGGCCGTGGAGGGTTCGGGAAGGTGTATAAAGGTGTGCTTCCGGTGTCTAAACTGGAGGTTGCGGTGAAGAGGGTGTCCCACGAGTCAAAGCAAGGAATAAAGGAATTCATCGCCGAGATTGTTAGTATCGGCCGTATCCGCCACCGCAACATCGTCCAGTTACTCGGTTATTGTAGGAGAAAAGGTGAACTCCTATTGGTCTATGATTATATGTCAAATGGTAGTCTGGACAAGTACTTATATCTCCAAGAAGAGGAGGAACATAAACCCACTCTAGATTGGGCACGGAGATTTGAAATCATCAAAGGTGTTGCATCTGGCTTATTCTACCTTCATGAGAGGTGGGAGAAAGTTGTCATCCACCGAGATATCAAAGCAAGCAATGTGCTTCTTGATAGTGAAATGAATGGGCGCCTGGGTGATTTTGGCCTCTCAAGGTTGTATGACCATGGCACTGATCCACAAACAACACGAGTTGTCGGCACCATGGGATATTTCGCTCCAGAGCTAGCGCGCACCGGTAAGGCAACGCCTCTAACAGATGTGTATGCATTTGGCATTTTCATCCTCGAGGTAACTTGCGGACGAAGGCCTATTATTGACAGCAATCAGGCAGAGGAGGTTGGTTCAGACATATTAATTGACTGGGTTGTTGAGCATTGGAGCAAAGGCTCACTCGCGGACACGCTGGACATGAGGCTACAAGGCAGCAACTGCAATCTTGATGAGGTCTGTCTGGCGTTAAAGCTAGGATTGCTGTGTGCACATCCATTTGGCAATGTAAGGCCCAGTATGCGGCAAGTCATGCAATACCTCGACGGTGAGATGCTGCTCCCGGAGCTGATGCCCACAAACGTCAGTTATAGCATGATGGCCGTAATGCAGAATGACGGTTTCAGCCAGTACACATCATTGACTGACACAGTTAGCAGCAATGGAGTGACCTCCAGCCTTTCAACTGGAAGATGATCCGCAAGCGTCTCAAGATTTAGTAGTCAGTATGTATTTCTTCACAGCCGGATTTTGGAAGAACAAAATAATAACAATTCAAGTATCACTATTAGATGTAGCAGGCTGCAGGCCTCTGTTTCTTCTCAGTTTTCGGCTTGAATTAATAGATATACTTTTTTATGCAAAGGTTAGATCTTGTAAACAGTTGTAGATTGAGCTTCTACTTGTTTGAAATTAAAAGGACTGCCAGTTACTAGTCTTATAAGCTACCCTGCAGGGTTTCAAACCCAACTCTCTCTCTCTCTCGTCTGAACATATATATACATATGCAGCACTCCTGCATATAAGTTCATATGTGCTGCATATCAGTTTTGTAATGTTGTGATTGAGATTACCGGGTAAAATTTAGTGAACAAACTCGGTACTAAAGGTACACCACAAACCTTTATTCTTGAATGCTACACTAGTATACAAAGGACAGCCCAATCTTGAAGAGAGCAACTGGTTCACACCTTGATTATTTAATCAGCAGCTGAGAATTGTGTGGCATGTGCCATTGGATGAACATTCATATGCTGCCATTCAAGAGAATTGGTCAGTTTTTGCTAAATTAAGCGATAATAAGAAGCTAAGTTTATGGCATTAGAGCAGTTACCTAGGGAATTTAATTCATTGTTGCACTATGCCTGCTCCCATGGAAGAATCAAGGGTCAAAAGGTGACAGACTCTGGATGTCCAATAAATCCAGACATTAGAGCAGCCATCAGTTCACGTGGTGGGTGTACTGTTACTGGACATCAAAAGTGAGGAGCCAGGGTGCGTCGCTGGTTCAGTCTTGGGTGAAAAAAAGAAGGGCATTTGTTGCCTGGACCACAACTGAGTCTTGTTGCCCTGTTTTTTTCCTCTGTTCTTGTTGGCCTGTGTGTCCATTTCATCGAGCAGCTGCAGGGCGTATTGAGTCCACCAAAACTTGTGAAGACAACAAAAGATGTGGCCAACAGACACAAATTACTTTACTAAACCAAACCAAAAAAGTGGCAGCATGGCGGTGCTAATAGTAGTTCCCGAGGAAAATTATTTTTGTTGACATGAGAATGTAAATACTAAAGATCTTCCGTCTCAAATTCCTCTGTTTTAAATATATATTGGAAATTTGGAAGCATGGCTACTTGGTCAACTTCCACTACTCTCTGCCTGATGACCGGTTATGGGCGATAGGTGGCACAGGTGCGGGGACACTAGCTAGGTTACTTCCCTGTAAAAGTTGATGTTGTGGAACAGTGGGAGGGATTGGTTAGGCAGAGGAGACCACAAAGGAGTTATCAGGACCAGAGCCTTGGGCAAAACAGGGGTATATGTATGTATGCATCTTTGGGTGGACAGGAGGCGAGGATGGTCTGATGTATAGCAGTTGTTGTATAGTATTAGTGGAGGGCACATTGTATATCGTACTCCCTCCGTCCCAAAATAACTGTCTCAAGCTTAGTGCAACTTTATACTAGAGTTAGTACAAAGTTGAGACACTTATTTTGGGACGGAGGGAGTACAGTGTATGATATACTGTAACAGCAACAGAATATTTGTTCCAAAAAGGCAGCAAGGATGTGCAGGCATCGTTATTTCAGATGCTATTCAGGCACACGCTCCTTGTTGTTGTTGCCCTTTTGAGCTGACAATATTAAGATTGTGGCGAGAAAGAACCACAAGTTCAGAACGGAATGCCTAAGATGGCTCTTTATGGACTAATCTTCAACTAATGACTGCTGCTGTACGAAAGAATTCAGTGGCTGAGATTTTGTTCAACCAGGTCCAGAATTCGTCTATTAAATCTGCTGCTTACCAAAATATGTTTGCTTACTTATGACAGGTAGAGATGCATACATGTCCTGCAGAATCGTTATTCTTCTTTGGAGCTAGCAACGTGTATGTTATCGGAATTTCACAGCCAAAATCGTACTCGGTAGTACCTCGAGGCAGCAGTGCAGCAGACCCATTCCATTCAAATACTCCCTCCGTCCCAAAATAATTGTCCCAACTTTATACTAGCTCTAGCATAAAATGCTTAAGACACTTATTTTGAGACGGATGGAGAAGTATCTTGTGTACATAGCTTGTTCAACCGCTTCCTTGTTAGAGTCTAATTTATTTCAGTTTTGTGCTAACTATTTGTGTTTAAGATATAATGTTCTTCTGTTAGCACCTAATGATCATGTTTACATGTTAATGGCCTTCGGTTAATGATCATGATTGCTTTCGGATAGTGGAGAGAAAATAATGGAAAGCTTTCGGAATGGGAGGCTTGCCTTACCTCACGATCGCCGCATCGGCACCTCGTGCATGGCCAGTACCGCGCCATCGTCGTTCTCCTGCCCGGAGACGGGCGGATCAAGCTGATGATGCGCCGGATTTATGGACGACGTCAAGCGTGGCTTCCATGCCACCAGTGCAGACACTTTTCCCCGTCACCTCGCATTGAAAAAAGGCGCCGGGGTCTGGCGCTCGGCGCTGCGCATCCCGGACGACGGCGGGAGCCGGCCTCCGTGCCCAATGGCTGCCACCTTCATTTCCTTGTGCCGCCTTATGACCATGCGCTCGCGGCGCGGCAAGCGCCATTCGACGGAGCAGCGCGCGGGATTCGCCGATGCACGCCAGTCCGGCGAATGGAGCCACCGCGACACCATGGTACGACGCTCGGCGCCGCCATTCGGTGCGGGGAAGAACGTGACTAGGGGTTTCCAGCCTCCAGTTTAGCCGTCAGATCTGATCGGACGACCAGAAACAATAAGGAGCGCCAGGCGGGCCTGCG
>HvleckRLK111
CACAAAAGAAGATCGCCTCCCCGAAAAAAAAATATCACCAGCGCCTGCTCTTTGCTCCCTCGCCGACCGTTACGTTCAAACGCGCCAATCCGACCGTTACCCATAAAAAACACACCACAAACCCATCTCTTCCCGAACACTTGCTCTGCTCCCACTGTCCTGTCGGAATCCCCAAACTAATCGCTGCAATAATACTCCCACAAGCCACAAGAACTGCGCGCTCCACAAAATCTCATGATCCGAACACCGCGCGACCACCACCACCAATGGCCGCCGACCTACTCCTCCTCCGCCTCGTGCCGCTCCTCCTGCTGCTCCTAGCGGCGTCCCTGGTGCCGCCCGCCTCGTCGTCCGCGGGGAAGAACAGCTCCGTCAGCATCGACTCGGCCACGCTGTCCTTCTCCGACCTGACGCTGCTGGGTGACGCCTTCCTGCGGAACGGCTCCGTGGGGCTGACGCGGGACACGGGCGTGCCGTCCTCCAGCGCCGGCACCGTGCTCTGCACCCGCCCCGTCGCGCTCCGGGGCAACGGCAGCAGCAACAACGCCACCGCGTCCTTCGCCGCCAGATTCTCCTTCGTCGTCGCCAACCAGAACGCCGGCTCCACGGGCGGCGACGGCATCGCCTTCTTCATCTCCTCCGACCGCGCCACGCTCGGCGCCACCGGCGGCTACCTCGGCCTCTTCAACTCCTCGCTCGCCGACGCTGCCGTTCCGAATGACGACGACGCCGACGCCGTCGGCCCCGCCATCATCGCTGTGGAGTTCGACACCATGGTCAACTCCGAGCTCGGCGACCCGAGCGACAACCACGTCGGGCTGGACCTCGGCTCGCCGGTGTCCGTCAGCGCCGTCGACCTCGTTGACTCCGGGATCGTCCTCAAGAGCGGCAACCTCACCACCGCGTGGATCGATTACCGCGGGGCCGAACACCTCCTCGAGGTGTCGCTGAGCTACTCCGGTGTCAAGCCGAAGCGGGCCGTCTTCTCCGTGGCCGTCGACCTCTCGCCGTACCTCAGGGAGGCCATGTACGTCGGCTTCTCGGCCTCCACGGAGGGGAGCACCCAGCAGCACACCATCAAGGAATGGACCTTTCAGACCTTCGGGTTGCCGCCGGCGACCAACGCCTCCACCTTTACCAACGCCACGAGCAATGTCTCGGAGCCAGCAGTGCCCGGCGTGGCCGCCGCGAGCGGCGGCGCCACCAGCAAGAAAAGGTTTGGGCGCGCCATCACCATCCTCGGCCCCGTCGCGCTCGCCGTCGCGTTCGTGTTCTTCGCATGTGTCTCCGTCAAGAAGCTGGCAGAGCTCACCTCGAGGAAGGACGCCATCTTCCTGCCGGGGCTGCTCAAGGGGCCAAGGAAGTTCAGCCACAAGGAGCTGAGCGTGGCGACCAGAGGATTCCACGCGAGCAGAGTCATCGGCAGAGGCGCGTTCGGCACGGTGTACAAGGCGGCCATGCCGGGCGCGGCCACCACCTACGCAGTGAAGCGGTCGACGCAGGCGCACCAGAGCCGGAGCGAGTTCGTCGCCGAGCTCTCCGTCATCGCCTGCCTCCGCCACAAGAACCTGGTACAGCTGGAGGGCTGGTGCGACGAGAAGGGCGAGCTGCTGCTCGTCTACGAGTACATGCCCAACGGCAGCCTGGACAAGGCGCTGTACGGCGACCCCTGCACGCTCTCCTGGCCGGAGCGCCACAACGTGGCCGCCGGTATCGCGTCCGTGCTGTCCTACCTCCACCAGGAGTGCGAGCAGCGCGTGATCCACAGGGACATCAAGACGGGCAACATCCTGCTCGACGGTAACCTCAGCCCCCGGCTGGGCGACTTCGGGCTCGCCCGGCTCATGGACCACAACAAGAGCCCGGTGTCCACGCTCACCGCCGGCACCATGGGGTACCTCGCGCCGGAGTACCTGCAGTCCGGCAAGGCCACCGACCAGACCGACGTGTTCAGCTACGGCGTGGTGGTGCTGGAGGTGTGCTGCGGGAGGCGGCCGATCGACAGGGAGGAGACCGACAAGGATAGCAAGAACGTAAACCTGGTGGACTGGGTGTGGCGCCTGCACGGCGAGGACCGGCTCATCGAGGCCGCCGATGCGCGGCTGAACGGCGAGTTTGACAGGGAGGGGATGCTGCGGCTGCTGCTTGTCGGGCTAAGCTGCGCCAACCCCAACTGCGAGGAGCGGCCGGCGATGCGGCGGGTGGTGCAGATACTGAACCGCGAGGCCGACCCGGTGCCCGTGCCGCGGAAGAAGCCGCTCCTCGTGTTCAGCTCCAGCGCGTCCATCAAGCTGCAGGAGATGGCCTTCTCCTGTGGCGACGACGTCAGAGGAGGCTACCCGGCCGCCGCCACCACCACCGCTAACCCGGCGTCCCCGAGATCGGAGGGAGCCGGCATAGAAAGGTGATCAAAGGAAAACAACGTACTAGTGTGTGATTCTCGTACACGTTTTGTTGCGATGTGCTTGCTCATAAGGGGAATATAGGTAATAATCCCCAATGGTGTATGATTGTTGGAATGCTAATAAGCTTATTGGGTGTGTTTATGTCGTTTAAGC
>HvleckRLK112
ATTTTCTCACACATTTTTCCGCTTTTCCTCCATCGCAGGAAACGACCACGATGGCGTCTTTCTGCCGCTCCGCCGCCGCCGCGGCCAGGTCGGCTGCGCTCCGGTCCAAGTCCCGGATCGCGAGCCCGTTCCCGGCGACGAGGTCTCCCGTTGCCGCCGCTCCTCGCCTCCGCAGGTCATTCCTGAAATCCTCAACCCTTGTGTCGTCTCACCGCTAAACCCGAGAGTTTTCCAATCCTGCTGCTCCTTCTCTCAGGTCCGCGGTGAAGATGCTGGCGGGCGCGGAGTCGCTTATGCCGCTCCACAGCGCGGTGGCTGGCGCGCGGCTACGGTCGTGCATCGCCGCCGACTCCTCCTGCTGGAGCTACCTCTCCCAAGGTGAAGACAACCCCCTGCATCCAGTTCCTTGTATTTCTGTTACAATTGAATGTTAAGTCGTGCTAGTTTGATTAGTCGTGCTTGTATTGAGGATTTTCTACTATGTAATGCTGGAATTGCAATGCTTTGTTTACGGAGGGACTAGTCAGTTGAGATGTGTTAAGTTCTAGGATATGATATTTCTGCGCAATTTGTTTTAGCGTGTGCGCATAAGATCTATCATTAGTTCATTGCATTGGTGCGATCGTGTGTAAAGCTGATGGATTTATCAGTTCATGTATGGGGCTGCTTTATGGATTCCAGTTAGCCTTGAAGAGCATTCCCATGCTTATCCATGGTAAATTATAAATAAGATGTGAATATTTCTGTCTCTATGCCTGTATATGTTATGTTTATGTACTTGGCAAGCTAAGCACTATTGTTTGTTAGCAAGTAAGAGCAAATGATAAATTTCTCGGTATGTTGCCTTTAGCTGGATATGTATATCTGTTTATTGTCTAGTTGTGCTTCTTCTTGCATAAGGGTTTTAACTAGATATGCACAGATTTTCATTGTATCTTGGAGATGACAAGGTTCCAGAATTATTGTGCCCATTTTTCTTCTTCGTTAATGGTGTTTTCTAATCCGAGGAGTCAGTTTCCAAAATTCATCCTCGGCATATTTAAAGCTATTCAGTTTGACTATATGAAAACTATATCACTAGTTTCTTAAAGTTTTCAATAATCTTATAACTTATACTAATGTATATGCTGTATAATGAACAAAAATGTGTCTCAGAACTGTGAAAAGTGAAAGTATGTTACATCATTTAAAAAAGAATAGAGGAAGTAACTTTCAGTATATAATACATTAATTTCACACTTGTTGTTTACTTACATTCTCATTTCTGTTTTGGTAATCATCCTGGTAGGTTTGATCAAGCGCATCTGATAATGGCTAGGAGTGTAATGTTGAAGAGCATGGATCACTTGCTCCTGTGTCATTTTCAAGATATTTTCTTTCTTCTCTGAAGAATATGATATGTCAGTGTACATTAATCGAATTTTATTGAAAAAGTTGCAACCTAATCTGTTGGTGACTCGTTCACAACTATCGTTTAATTTCAATCTATGCAATAACAGAGTTACCGCAGGTCCTTGACGTAATGTTTGTTTTGTGGACACCTTGAATTTTAACACTGGGTGGCATTACGTTGTTTGTCGTTTTCCAGTCTTGCGTGTATATTGGCGGGTCATTTGGGTGTTTTAAATTCATCTTATGTGTGCCGTTCCTACAAAGACAAAAACTCCTACAAATTGAAAAGCCCAGGTCAAAATCCTACAGCGGTGATCATTTTTTACAATTCCTTTTGTTTATTTGTTGTTCTTCATTTTGCTTTCTGATATTCAGTAAGGAGCCTTCTCTTTTTCTTCTTCTCCTCTCATTGAGCTTTGTTGTTTTGTTTTGATACAACGGATTAGACTTTGCTCTTCCTCGGTGACGAAGGCTGAAGAGGTGGGCATCCTACTAGGAACAGCACTCAGGATGGATCTTGTTTCCCTGTTAGATGCCCGGCTTGGTGAGTCCATGGCTGCAGAGATACTGAACTTTGGTTGGTGACTCGGTGTTCGGGTGCGTTCTTTAACTAGTAGGGTTTCCTGGTGGCTGAAATGTCCTTTTCTCTGTATCAACTGTTATCTCGTGCCTAATCTGAACATGAGTTTCGTTCTTCATGAAGACAAATGGTGAAGTCTCTTCTTCATCCTGATCACGCGGCCACCTGACTCTTTGTTATTTTCCTAAAAATAAAAATCTCATGCTGACGGACCAGGTTATTTTTTCGGCCGGCTTGCCATTATTATCCAGTGATTATGATTAGTTAAGTTAGCAGACTGCATCAGGTATATTATTTTCTGTTTGGCTGGCTTATGTTTGTCCTATATAGTTACCTGTTACTTTGCCGGCCTACCTGTCCCCTCACATCGAATCAATAATCCGTCCAAATTTCCCCAATTGGAGAAGCAAGGAGGCGGTACTACTTAAGAAGTGAGCTGATGCATTCTCTTATCTTTACGTGCTATCTTCCAGTTCTTGCATTTGCCAACTAGTCTACCAGTAGTGTGCTCCGGCACCGGTGATGGCCAAGATCACAGCAACAGCCACATATGCTTTCTTCATCTTCTTCTCCTTCGCTTGCTTCCTGCCTCCTCTTGCTGTGTCCTTGTCCTTCGACTACCCGACTTTTGGCTCGGATGACCAGAAGGCCATCAGGATAGAAGGCAACGCTTCCTTCAGTGTCGGGCACATCGACATTAGCGCCAACAACTGGGATGTCCGTAAGAGCCAGGGGCGGGCATCATACAATGCCCAGCCAATGTTGCTCTGGGATGGGCACACAGGGGAGGTGGCCAGCTTCACCACCACTTTCTCCTTCATCATCAAGCCCAAGTTCAACAGCACCAGGGGGGCTGGCATGGCTTTCTTCCTTGCCAGCTACCCGTCGAGCTTACCGACTGGGTCAGCAGGTTACTACAACCTCGGTCTCACGAACCAAAAAGATGGCACTATGGCGCCCGGTGACAACCGGTTCGTGGCGGTGGAATTCGACACCTCCAATGAGACCGAGGTATCAGATCCCAACACCACGTTGGCATCAACATCAACTCGTTAAAATCGGTGAAAACATTGCCCTTGCCGAACTTCAGCCTCATTGGAAACATGACTGCCGCAATCCAGTATGACAACATTTCAAGTATCATGTCTGTGACACTATGGCTTGGTGATGACCATGGCCCGAGTTACAGCCTTAGCTCCAAGGTTGATCTCAAGAGCGCATTGCCGGAGCTGGTTGCCGTTGGCTTCTCGGCGTCGACGGGCAAATCCTTTGAGCTGCATCAATTGCTTTCTTGGCACTTCAACTCATCGTTGCAGGGCAAGACAGCAACAGTAGTAGCGCCGCCGGTACTACCACCACCCTCCTCGAGAACTTCCAGTTCCGGAGTCGTAGCGGGAGCCGTTGCTGGGGCATCGCTGTTCCTGGTGGTGTTCTTCTCCATGTCAGCCATCTTGCTACGTCGTCGTCATAACAAGAAGAAGAGGGAGGCAAAGGAGGAAATGGACTCGGAAGACGAGATGATCATGGAGATGGAGTTCGGGACGGGGGCAAGGAGGTTCCCGTATCGGCAACTCACCAACGCGACAAGGAACTTTGCAGCGGAGGAGAAGCTCGGGCAAGGTGGCTTCGGTGCGGTGTACAGAGGCCACCTGAGAGAGCTTGGCCTCGACGTGGCCATAAAGCGATTCTCCAAGGAGTCATCCATGCAAGGGAGGAAGGAGTACATGTCGGAGATCAACGTGATCAGCCGGCTGCGCCACCGGAATCTGGTGCAGCTTGTCGGCTGGTGCCACAACCATGATGAGCTCCTGCTGGTTTACGAGCTCATGCCCAACCGTAGCCTCGACATCCATCTCCACGGCAAGGGCACCTTCTTGACATGGGCGATGAGGTAACGTCTTAGTTGCACGGTGTTCATCTTAACGTGAATTTGGCATCTCTTGGAGCTCATGAACGGATGTCCATTGCAACAGGATGAAGATAGTCCTCGAGCTTGGCTCTGCGCTGCTCTACCTCCATGAGGAATGGGAGCAATGCGTGGTGCACCGGGACATCAAGCCCAGCAACGTGATGCTGGATGAGTCCTTCTGCGCCAAGCTAGGCGACTTCGGGCTCGCGAGGCTCATCGACCACTCCGTCGGGATGCAGACGATGACCATAGTTTCCGGTACGCCGGGCTACATGGACCCCCAGTGCCTGATCACCGGCCGCGCAAGCTCTGAGTCGGACGTGTACAGCTTCGGCGTGGTCCTGCTGGAGGTGGCATGCGGGAAGAGGCCGATGAGCACATCCGCTAACAAGCAGGGCGTCTCCCGGCTGACCGAATGGGTCTGGAACCTGTACGGCCAGGGAGGCGTTCTTGAGGCGGTCGACGAGCGGCTGAACGGCCACTACGACGAAGCGGAGGTGGAGCGTGTGATGGCTGTCGGGCTCTGGTGCGCGCACCCGGACCCGAGCGCGCGGCCGTCCATCAGGACGGCTATGGCCACGCTGCAGTCCAAGGATGCCAAACAGCCGCCCATGCTGCCGGCCAAGATGCCCGTGCCCACGTACGCTCCCCCGATGGCCCCGTGGGACGGGCAGTCGTCGTCTTCAGGGTTGTCGGCGTCCACCGTGACGCGGTCGTCAACGACGAGCGGCTACACGGGGCCAGCGCCAATGGTGACACCAAGGGCATGAGCACCGGCAGGTCCACGTCGAGGTCTGAACTGAAATGACTTTCCGTTGGGGCTTCGTACCGAACTGAGATGTCCAGCACGATCATAGATGCGCTCACATCAAATGCTCATGACTTCTTGAGTTGTATCTATCATAAACGACGATGTGCGTTACCTTCACAACTTGCGCTGCTCCTTGCAGGCACGGAACAGCGTTAGAGCCTCTGTAGCCGAATACTCCTATTTGCTTGAGCTGCTCAAAATTTTAGCCCTCCGCCGACTCTTAATTTTGAGCGGCTGAAAGGAGTTCTC
>HvleckRLK113
ATGAGATCGAGAGCCACGGGAACTTGCTTCATGGCTCTCCAGTTCGTCCTATTCTTCACTTTCAATATTGCCGGCGTCAGTCCTCTGTCCTTCAAGCTGAATTTCACCGAATCCAACTATACTGCGTCCACCGCAATCAAGTTCCAGGAGGACGCCTTCTACAACAAGGGGATCAAGCTCACCAAGGACCAGCTCAAAGACCAGATCACTAACAGTGTAGGCCGAGCAGTCTACACCGATCCAGTGCTTCTCTGGGATACCGCCACTGGCCAGTTAGCCGACTTCTCAACCCGTTTCACCTTCAGGATCACTGCCACAAACACAAGCGCAACCGACGATCCATACGGTGAGGGCCTAGCCTTCTTCCTCTCACCATACCCTTCTGTGGTTCCCAATAGGTCCACTGGTGGTTTTCTTGGCCTTTTCAGCAATGGGAGTGATCAGAATGACCCATCTAATGAGCTCGTGGCTGTTGAGTTCGACAGCCACGATGACACATGGGATCCAAAAGGCAACCATGTGGGCATTGACATCCATTCAATTGTATCCGTAGCCCACGTGGTGTGGAATAGTAGCATTAATGATGGTCGCATAGCCAATGCGTGGGTAAGTTACAAGGCCAGCTCCTTGACCTTGAGCGTCTTCTTGACGTACCTGGGGGATCCACAATTCAGTGGCAACTCCAGCTTATCTTATTCAGTTGATCTCAGAAAATACCTCCCAGGCAAAGTGGCCATTGGCTTCGCAGCTGCCACGGGTAGATTCGTTGAGCTCCATGAGATACTTTTCTGGGAATTCAATTCTACGGATTTGCAGCTGATGAAGACTGAGAAGATGAGAAGTGTACTGGTCATAAGCTTGGCTACTACCATAAGTGTCGTGGTCTGTTCTATGTGCTTGGTTTGGTGCCTTCTGCATTTTAGGACTAGAAGATCAAGAAATGAGAAACAAAAGAAGCTAGGGTATCATGAGTCCATTGATGGTGAATTTGAAAAAGGGAGCGGCCCAAGAAGATTTCGGTACAATGAACTTGTGGCTGCCACAAGGAACTTTGCTTTGGAGAGAAAGCTTGGAGAAGGAGGATTTGGCGCAGTCTATCAGGGCCTTTTGAAGGATCAAAACCTAGATGTTGCCATAAAGCGAGTGGCAAAAGGGTCTACACAGGGAAGGAAGGAGTACATATCTGAGGTCAAGATCATCAGCCGGCTGAGGCATCGCAACCTTGTGCAGCTTGAGGGCTGGTGTCATGAGCATGGAGAGTTTTTGCTTGTCTACGAGTTCATGCCAAACAGGAGCTTGGACACACACCTCTATGATAACAGTAACTTGCTAACATGGCCATTGAGGTTCAAGGTCACCGCAGGTGTTGCATCTGCCCTCCTGTACCTCCACGAGGAATGGGAACAATGTGTCATTCACCGTGATATCAAACCGAGCAATGTCATGCTTGATTCGGTATTCAATGCCAAGCTTGGTGATTTTGGGCTCGCGCGGCTCATTGACCACGACCGAGCCTCGCAAACTACAGTGTTAGCTGGGACAATGGGTTACATGGCTCCAGAGTGTGTCACCACTGGCAAGGCAAGCAAAGAATCTGATGTCTACAGCTTCGGAATTCTTGCACTGGAGATTGCATGCGGAAGGCGACCGGTTGTGCTAAAGGAAGACGATGACAAGGTTATATTGGTTCAGTGGGTATGGGATCTTTATGGAAGAAACAAGATTCTTAATGCAGTTGACAGCAGGCTTGACGGTGCATTTGAAGATAGAGATGCAGCATGCTTGATGGTTGTCGGACTGTGGTGTGCACATCCAGATTACAATCTTCGACCTTCGATTCGTCAGGTCATAAGTGTACTGAAGTTTGAAGCACCATTGCCAATCCTTCCCCCGAAGATGCCAGTGGCAATGTACTTTGCACCGCCAATTTCTCTGTGCAGGTTTTCATACACCTCATCTGATGGAACACTCAAGCAGCAGGAGCTGGAGAGGTCCAATGGTTATGGAAAAACAAGCTCATCCACTACAACCAATGCATCCAGTTCACCTCCTTCTGTGCGGTTGCCAGAGGTGGGCTACTAA
>AT3G16030
ATGTGGTCAAATTGCATCTTTCTCACTCTTTTTACTTTTTATCTCTTCTTAGGACAATCATGCTGTCAAACAGATACCCTACTGCAGGGTCAGTACTTGAAAGATGGGCAAGAGCTCGTTTCAGCTTTCAATATCTTCAAACTCAAGTTTTTCAACTTCGAGAATTCAAGCAACTGGTATCTTGGAATTTGGTACAACAATTTTTATCTTAGTGGTGGTAATAAGAAGTATGGTGATATCAAGGACAAAGCTGTTTGGATTGCTAACCGTAACAATCCAGTTTTGGGACGCTCTGGAAGCCTCACAGTGGACTCTCTTGGCCGATTGAGGATTTTAAGAGGAGCATCAAGCCTGCTTGAGCTAAGCTCTACGGAAACCACAGGAAACACAACCCTTAAGCTGTTGGATTCTGGAAATCTTCAGCTCCAAGAGATGGATTCTGATGGATCGATGAAGCGGACGTTGTGGCAAAGTTTTGATTATCCAACAGATACTCTTCTTCCGGGGATGAAACTGGGTTTCAATGTCAAGACCGGAAAGAGATGGGAACTGACATCATGGCTAGGTGATACTTTACCCGCTTCTGGATCTTTTGTCTTTGGGATGGATGATAATATTACAAACCGGTTGACCATCTTGTGGCTTGGTAACGTGTATTGGGCAAGTGGGCTCTGGTTTAAGGGTGGCTTTTCGTTGGAGAAATTAAACACGAACGGTTTCATCTTCTCCTTCGTTTCAACCGAAAGTGAACATTATTTTATGTATTCAGGTGATGAGAACTATGGTGGACCATTATTTCCTAGGATAAGGATAGACCAACAAGGCAGTTTGCAGAAAATTAACCTTGATGGAGTGAAAAAGCATGTCCATTGTTCTCCTTCTGTGTTTGGTGAAGAGCTTGAATATGGTTGTTACCAACAAAATTTCAGGAATTGTGTGCCCGCACGTTACAAAGAGGTAACCGGGAGTTGGGATTGTTCGCCGTTTGGGTTTGGTTACACTTACACCAGGAAGACATACGATTTGAGTTATTGCTCGCGCTTTGGTTATACTTTCAGAGAGACTGTATCCCCTTCCGCAGAAAATGGATTTGTATTCAATGAGATTGGTAGAAGATTAAGCTCATATGATTGCTATGTTAAGTGTCTCCAAAATTGTTCTTGTGTTGCCTATGCTTCAACCAATGGGGATGGTACGGGCTGCGAGATCTGGAATACAGATCCTACCAACGAAAATTCAGCTTCTCATCATCCCAGAACTATATATATTCGTATTAAAGGTTCAAAACTCGTGAAAATATATTATCTGCCTTTTTATTATTAAGTGTTCCCATACTGCAGCATTTCTATTTGAATACTAAGTTTTCTGAAATACAGGAGTTGTGGTAGACCAAGGGAACGAAAAGGCGGCAACTTGGTTAGTTGTTGTGGCATCACTATTTCTAATAATACCTGTGACTTGGTTGATCATCTATCTTGTTTTGAGGAAATTTAAAATAAAGGGTACAAATTTTGTATCAGAATCACTCAAAATGATTTCTTCTCAATCATGTTCTCTTACTAACAAGTTCACCACCTTCTTTTTGCGTATTTGATCCAGTAACTGTTATATTTCGCGGAATTTTCTACTTTTTATGGGGAAAAGTCATTCCACAGAGTAAGGCTCAGCTGAATAACTTTTGTTTAGTTATGTATGGAAAATGTCCATGTTGGATCAGGAACTGTGTTTGTGATGTTTGGTATTTTATTTAGTGATTGGTTACATACGGAGGAGGCTTTCAACACTGAGAGTTGGTTCAACAATAGACCAAGAAATGCTACTACTTGAGTTGGGGATTGAAAGGAGACGCCGAGGCAAGAGAAGTGCAAGGAATAATAATAATGAGCTTCAGATCTTTAGCTTTGAAAGTGTCGCTTTTGCAACAGATTACTTCTCTGATGCAAACAAGCTCGGTGAAGGAGGTTTTGGTCCTGTATATAAGGTAGTTCAGATTCTTCAGATTTTGATATTAACTTAAGCAGACTTTGATGTATCCGCTACTCTCTTGAAGGGGAGGCTAATAGATGGGGAGGAAGTGGCTATCAAAAGGCTATCATTAGCATCCGGGCAAGGATTAGTGGAGTTCAAGAACGAAGCTATGCTTATTGCAAAACTTCAACACACAAATCTTGTCAAGTTGCTAGGATGCTGCGTCGAGAAGGATGAGAAAATGTTGATTTACGAATACATGCCCAACAAGAGCCTTGACTACTTCCTCTTTGGTGAGCCTTCATTAAAAGGCTAAGAATCTATATAACCCATCTGAAAAATGTCTCAACTCTGTGTAGATCCCTTGAGGAAAATTGTTCTGGATTGGAAGCTGCGGTTTAGGATCATGGAAGGGATAATTCAAGGGCTTTTGTACCTTCATAAGTACTCGAGATTGAAAGTAATACACAGAGACATCAAAGCCGGCAACATTTTGCTGGACGAGGATATGAACCCCAAAATATCTGATTTTGGAATGGCTCGGATATTTGGAGCCCAAGAATCCAAAGCCAACACGAAAAGAGTTGCTGGCACATTGTAAGTGAAGAGTGACTAGAAACAAGGAGAAGATTCTCTGATCATTTTATAGACTTTCTTGTGTTGATATTATTTGTAGTGGCTATATGTCTCCAGAGTACTTCAGAGAGGGATTATTCTCGGCGAAATCAGATGTGTTCAGCTTCGGGGTTCTAATGCTCGAAATCATTTGTGGAAGGAAAAACAATAGCTTCCACCATGACTCAGAAGGACCTCTGAATCTCATAGTCCATGTAATGCTCTCATATGTTAATATTCTCAGCTTGCCTTCTTTTGTCCATGCATCTCTGAAACTCTGTTTTTTTCAGGTGTGGAATCTGTTTAAAGAGAACCGAGTTCGCGAGGTGATTGATCCATCTTTGGGAGATTCTGCAGTTGAGAACCCTCAAGTGTTGAGATGCGTTCAAGTTGCTCTGTTGTGTGTACAACAAAACGCAGACGATAGACCAAGTATGTTAGACGTTGTGTCCATGATATACGGTGATGGAAACAACGCTCTTTCTTTGCCTAAAGAGCCAGCTTTCTATGATGGTCCCCCGAGAAGCTCGCCGGAGATGGAAGTTGAGCCACCGGAGATGGAAAATGTATCGGCAAATAGAGTTACAATCACAGTGATGGAAGCAAGATGA
>AT4G21380
ATATATTATTGACAGAAATAAAATCGGTTACGTAAGGTTCACACATTACACAAAACATGTCCGATATCTCCAATGGAAATAAACTCTCATACTTTTCTCAAGAAAGAGTGAAAAACAAAAAACTTGGTTTAGAGAAATGAGAGGTTTACCAAATTTCTACCATTCTTACACCTTCTTCTTCTTCTTCCTCTTAATTCTGTTCCCTGCTTACTCTATCTCTGCCAACACTTTGTCGGCTTCAGAATCTCTAACTATCTCAAGCAATAACACCATTGTGTCTCCTGGTAATGTCTTCGAGCTTGGTTTCTTCAAACCCGGTTTAGATTCTCGTTGGTATCTTGGAATTTGGTACAAGGCAATCTCTAAGAGAACCTACGTATGGGTTGCAAACAGAGACACTCCTCTCTCTAGTTCCATCGGAACTCTCAAAATCTCCGACAGTAATCTTGTCGTTTTGGATCAGTCCGATACACCGGTTTGGTCGACGAATCTGACCGGAGGAGATGTGAGATCTCCATTGGTGGCAGAGCTTCTTGATAATGGTAATTTTGTGCTCAGAGACTCCAAGAACAGCGCTCCAGATGGAGTTTTGTGGCAGAGTTTTGATTTTCCGACAGATACTTTACTTCCGGAGATGAAACTTGGCTGGGATGCCAAAACCGGGTTCAACAGATTCATTAGATCATGGAAATCTCCAGATGATCCATCAAGTGGAGATTTCTCGTTCAAACTCGAAACCGAAGGCTTCCCTGAGATTTTTCTATGGAACAGAGAATCACGAATGTACCGGAGTGGTCCATGGAATGGAATCCGGTTTAGTGGTGTACCGGAGATGCAACCATTTGAATACATGGTTTTCAATTTCACTACGAGTAAAGAAGAAGTGACTTACTCATTTAGAATCACTAAAAGCGACGTTTACTCGAGATTAAGCATAAGCTCCTCAGGATTGTTACAAAGATTCACTTGGATTGAGACAGCACAGAATTGGAACCAATTCTGGTACGCACCAAAAGACCAATGTGATGAGTACAAAGAGTGTGGTGTTTACGGTTATTGCGACTCGAACACTTCACCTGTTTGTAATTGTATTAAAGGGTTTAAGCCGAGGAATCCTCAAGTGTGGGGATTGAGAGACGGGTCGGATGGTTGCGTGAGGAAGACGCTACTGAGCTGTGGTGGCGGAGATGGGTTTGTGCGGTTGAAGAAAATGAAATTGCCGGATACTACCACGGCTAGTGTGGACAGAGGAATTGGTGTGAAAGAATGTGAACAGAAGTGTTTAAGAGATTGTAATTGCACGGCGTTTGCGAATACGGATATCCGGGGTAGCGGGTCGGGTTGTGTGACTTGGACCGGAGAGCTTTTTGATATCAGGAATTATGCCAAAGGTGGTCAAGATCTTTACGTTAGATTGGCTGCTACTGATCTCGGTTAGTTCATTCTCCACTATCTCTATTAGACTAAATGACATATGTTTGGTTTTCATTTTCCACATATTTACTTTTGCTAAGTAACGGTTGATAATAGTCTTCAAGATCACTTTTCAAAACATGTAAACAGTTTTATACATACTAGAAACTAAAAAGACATCATAAAAGATTTTGTCAGTAAGACTAAAAATTGATGCTAAAACTGCCCAATCAAGTTATTGAGTAATCCTATCACATTATACTAAAGATTTTCTTAAACGACAAAAGGAAGAAACGTTTTTTAAGGGTTTCAAGAATAGTAATTAACTTGGTTGTTAGATAAAGCACTTTTTTTTTGGGGTAGAATGTGAGAATGGTGTTGAATAGTGCAAGTCAATGTTATATTGTTGTTGGTTAACGAATTTGGAATTTAACAAAACGTTTTTCAGTTTTATTTTCCCTCTTTTCAAACTTCTTAAACTTGATTGAGATGTTGACGCATTCGGTCTTGGCATTATATGTGAAAACTCTTGTGATAAAGAACTAAGGTCCAATGGACTTTTAATCTTCTTAAAAGATGCAACGCATGAGTGAAACTTTTGATTACTACTATATTCTTCACAAAAACTTATCAATCTCAAGAATAATATGGTAAGGTAGATCCAAAGCCAAAAGAAATTATTTTTAGGTAGACCAATCTTTATGTTTTGTTTTTATTGGCGATAACAGTATAACGCTGTTTTTTGTTTGTTGGCGTTTATCTTTAATCAAAAGTACGACAATGTTTATTATTTTGTTAAATCATAAGACTAATACTAGTTTGTTTTATAAAATGATATTCATTTCCATGGTCGAGGTCCTAAATGTTGTGCTCAATTTGACATCTCTTTTCATTATTTCAGAGGACAAAAGAAACAGAAGTGCAAAAATCATAGGTTCGAGTATTGGAGTGAGCGTTTTGCTTCTTTTAAGTTTCATTATCTTCTTCTTGTGGAAAAGGAAGCAGAAGCGATCAATACTAATCGAAACACCTATTGGTATATCTGTAAATTTTAATTCCTTTCTTTTTGTTTGTAAATTTCTTAAAACTAATATCTTTACTGTTTTTGGTGTCTGTATGTAACAGTTGATCATCAACTGAGAAGCCGAGATTTGCTAATGAACGAAGTTGTAATATCAAGTAGGAGACACATATCTAGAGAAAACAATACAGACGATCTCGAATTGCCATTGATGGAGTTTGAAGAAGTTGCCATGGCCACAAACAATTTTTCTAACGCCAACAAGCTAGGACAAGGTGGTTTTGGTATAGTTTATAAGGTAAAAATGATTGAAAACTTAATTCATAATCTATCGCTGGACAAATATTTCGTTGTGTAACAAAATTAAGGGTTACAGGGAAAGTTACTTGATGGTCAAGAAATGGCAGTGAAGAGACTATCAAAGACATCAGTTCAGGGGACTGATGAGTTCAAGAATGAGGTAAAGTTGATTGCAAGGCTTCAGCACATAAACCTTGTTAGGCTTCTTGCATGTTGCGTCGATGCGGGTGAGAAGATGTTGATTTACGAGTACTTGGAAAATCTAAGCCTCGACTCTCATCTATTTGGTTAGTGTCTCAACTCCTTACAACTCTGTTCTAACAATTTTTCAATGTCTTTAAAAATAATGTACTCAATCCAGTGATGATTCATTAGCAGACAAATCCCGAAACTCTAAGCTAAATTGGCAAATGAGATTTGATATCATCAATGGTATTGCTCGAGGACTTCTATATCTTCACCAAGATTCACGGTTTAGAATTATCCATAGAGACTTGAAAGCAAGTAACATCTTGCTTGATAAATATATGACTCCAAAGATCTCGGATTTCGGAATGGCTAGGATCTTTGGACGGGATGAGACAGAAGCTAATACGAGGAAGGTGGTTGGAACCTAGTAAGCAATCATTCTCCAAAATATTAAAAATCTTTGTTTGAAATCTGAATTAAAAAAAAATAACTCAAAACTTTGAGTCTAATCTTCGTTATTCAGCGGTTATATGTCTCCTGAATATGCAATGGACGGGATATTCTCGATGAAGTCAGATGTTTTCAGTTTTGGGGTCTTGCTTCTTGAGATTATAAGTAGCAAGAGGAACAAAGGATTCTACAATTCGGACCGTGACCTTAACCTTCTCGGTTGTGTAAGTTAAAAACCTCTCAAACTTGATCTTGTTTTACACTCAAAATAATGATAACACTAGAAAAATTTCGATCATTATACACAGGTGTGGAGGAATTGGAAAGAAGGAAAAGGGCTAGAGATCATAGATCCAATCATCACAGATTCTTCATCAACATTCAGGCAACATGAAATCTTAAGATGCATACAAATTGGCCTCTTGTGTGTTCAAGAACGTGCAGAGGACAGACCAACTATGTCCTTGGTAATTTTGATGCTCGGAAGCGAATCAACAACTATTCCTCAACCTAAAGCGCCCGGTTATTGCCTGGAGAGAAGTCTTCTTGACACTGATTCTTCGTCGAGTAAACAGCGCGACGATGAATCATGGACAGTGAACCAAATTACTGTCTCGGTCCTTGATGCTCGGTAATGTGACTGTCAACTAGCCAATCTTCTATACTAAGATGACTAAATTGAGCGACAATAAGAATCAACTAGGAAAGATGGTATTAGTTATGTGCATAGTATTTTCTCTGTACGTCTCCGTTGCAAAGGTTACTACATGATTCAATTGTCTTAATTAAGCATGTATTCTGTAATTGCTTTATGGATAACCCAAATAGTCCTGCAGTTATAGGACATCAATGTGATATTTTGAAAGATTCTCAGACTTTCATATTATAAATTATGGCTACTAGAAGAGGCAAATATTGTTGGTTAGTAG
>AT1G61550
ATGACGAGGTTTGCTTGCTTTCTCTTCTCTACCTTGCTCTTAAGTTTTAGCTATGCAGCTATAACACCAACAAGTCCTTTGTCAATTGGACAAACTCTCAGCTCCCCTAATGGAATTTTCGAACTGGGGTTTTTCAGTCCTAATAACTCTCGGAATTTGTATGTTGGAATCTGGTTCAAGGGTATCATTCCCCGGACGGTTGTGTGGGTGGCCAATAGAGAAAATTCTGTTACAGACGCCACTGCGGATCTAGCTATCAGTAGCAATGGAAGTCTTCTCTTATTTGATGGCAAACATAGCACTGTCTGGTCCACCGGAGAAACTTTTGCATCTAACGGGTCTAGTGCAGAGCTTTCAGACAGCGGAAATCTTTTGGTCATAGACAAAGTTTCGGGAATAACTCTATGGCAAAGCTTTGAGCATCTTGGTGATACTATGCTACCTTACTCCTCCCTGATGTATAACCCCGGCACTGGTGAGAAGCGGGTATTGTCTTCTTGGAAAAGTTACACTGATCCATTGCCTGGTGAGTTTGTGGGTTATATTACAACACAAGTGCCACCACAGGGGTTTATTATGAGAGGCTCGAAGCCTTATTGGAGAAGCGGTCCTTGGGCTAAAACAAGGTTTACTGGCGTACCACTAACGGATGAATCATACACACATCCATTTAGCGTTCAGCAAGATGCAAACGGGTCAGTATACTTCTCTCATTTACAAAGAAACTTCAAACGTTCATTGTTAGTATTAACATCAGAGGGGTCACTGAAGGTTACTCATCATAATGGCACGGACTGGGTATTGAACATTGATGTTCCAGCTAACACATGTGATTTTTACGGTGTATGTGGACCTTTTGGATTGTGTGTAATGTCCATTCCTCCAAAGTGTAAATGCTTTAAAGGCTTTGTACCACAATTCAGTGAGGAATGGAAAAGAGGAAATTGGACTGGTGGTTGTGTGAGGCGTACTGAACTACTTTGTCAAGGAAACTCTACTGGGAGACATGTAAACGTCTTCCATCCTGTTGCCAACATAAAACCTCCAGACTTTTACGAATTTGTGTCCTCCGGGAGTGCAGAAGAATGCTACCAAAGTTGCCTCCACAATTGTTCATGCTTGGCCTTTGCTTATATTAATGGAATAGGGTGCTTAATTTGGAACCAGGAGCTAATGGATGTAATGCAATTCTCTGTGGGAGGAGAGCTTCTTTCTATACGTCTTGCAAGTTCTGAAATGGGTATGCCATACAAAAATAACATCAAACTTCTTTGTCATTTACAACTTTTACTTCATTTTCACTGATTAGCATGGCTTATTTGTTTATTTTTTGTCTTATATATCTCAGGTGGAAACCAGCGCAAGAAGACCATTATTGCTAGTATTGTTAGCATTTCTCTTTTTGTGACATTGGCTTCTGCTGCGTTTGGTTTCTGGAGATACAGATTGAAACATAATGGTAACATATTGTTGACTTTACTGTGAGCTTTTGCTTGATGGTTAAATACCTAAATGTTAAGCACTAACACATGAATTCTTGAAACTCGAATCAGCAATTGTATCGAAGGTTTCTTTACAAGGTGCATGGAGGAATGATTTGAAATCAGAAGATGTCTCAGGTTTATATTTCTTTGAGATGAAGACCATTGAAATTGCCACCAATAATTTCAGTCTCGTAAACAAACTCGGACAAGGTGGATTTGGTCCAGTTTACAAGGTCAGATAATTTTTATTCTCTTTATTCATTTTATCTCAAGAAATTTATAGAAATGTCTTTACCTTATGCAATCTGTCTCAGGGAAAGTTACAAGATGGGAAAGAAATAGCTGTAAAACGGCTTTCCAGCAGCTCTGGACAGGGAAAGGAGGAGTTCATGAATGAAATACTACTCATCTCAAAACTCCAACACATAAACTTGGTTCGGATTTTAGGATGTTGCATTGAAGGAGAAGAGCGACTGTTGGTTTATGAGTTCATGGTGAACAAAAGCCTTGATACTTTTATCTTTGGTGGGTTCTCTTTCCTTTTCTATTAGCAGCTTTTCTCTATAGAACTGTTTTTTTATATAGCTTTCACAATGTATAGATTCAAGAAAAAGGGTTGAGATTGATTGGCCTAAGAGGTTCAGTATTATTCAAGGAATTGCGCGTGGTCTTCTCTATCTCCACCGTGACTCACGCCTCAGGATAATTCACCGAGATGTGAAGGTTAGCAATATTCTTCTTGACGATAAAATGAACCCGAAAATATCAGATTTTGGATTGGCTCGGATGTATGAAGGAACCAAATATCAGGACAACACTCGCAGGATTGTAGGAACTCTGTAAGAACCACTTTTCGAAAACATGCTTAACTAGGATTCATAGTTATAATGATATATTAACTTGGAAACTATTTAATATATGTGCAGAGGATATATGTCTCCTGAGTATGCATGGACTGGAGTTTTCTCTGAGAAGTCCGACACCTACAGCTTTGGAGTTCTCTTGTTAGAAGTTATCAGCGGAGAGAAGATCTCGAGGTTTAGCTATGATAAAGAGCGCAAAAACCTTCTTGCATATGTAAGTAAGACTTTGGATTTAGAATATTGGACTTATGCAGAGATTTCACAACCTGTTCAAAAATGTTTCTTGCTCTTATATATTTCTTGTTCTGAAACCACAACAGGCGTGGGAATCTTGGTGCGAAAATGGAGGAGTTGGTTTTTTGGATAAAGATGCTACTGATTCATGTCACCCATCTGAAGTTGGAAGGTGTGTTCAGATTGGTCTGCTTTGTGTTCAGCACCAACCTGCTGATAGACCCAACACACTTGAGTTGTTGTCTATGCTCACAACAACATCAGATCTTCCACTACCTAAAGAACCCACATTTGCAGTGCATACTAGCGATGACGGATCCCGCACTAGTGATTTGATTACAGTCAATGAGGTGACACAATCTGTGGTGCTAGGGCGTTAAGAACAATGCTTTACCATAGTTTAAAATGATCTAATTTTCAGTGTTTGTACTTTGTAACTTCAACATACATTCATAATTTACTTACATTTTCAAATAAAGGGGTTTGGTAAGTCTTTCGGTTCTGTTAATGCCTATAGGGACTGTATATTGTTGAGTCCTCGTTTTGAGGCTTTACTAAAGTCTGTCTTCTCTTGCGTATAGGCATTTTTGCTCTGTTCTCGCTGGTAACAGTGACACACGCCAATGTTACATAATGTAACTTACATTAGACACACAAACAGTGACATTAATGTAAAGAGAACCGTAGCCTTCTAATTTATGCAACACAACAAAAGTGTATTCAAATACATTTTGTAAGAGGAAGCAAAACAATGCCAATTGCATTCGCTAAAACCGTAAACCAAATATTCATCATAGGAACATACTAATCAAAACAAAATGACATTATCCGCGTTAACCATTCAAGCCATCAAAGAGTAGCAGAAAGACCATCCGCATACAACAAACGACAAGACTTGTGGACTGGAAGCACAGCATCAAACCACTCAACTTTCCCCCAAATCTCATCTCCATCACCACGCCTTTCAAGCGAAATCTCCGCACACCAAATCACATTCTCTTTACGTCTACTTGAATAATACACAGACGCATCCCACAACACCATCATC
>AT4G32300
AAGACACTCGCAGCATCTCTCTACTTCTCTCTCTCTCTGTTTCAACCCCTCTTGTCGTCTATCTCCATCAAAAAGACCAAAATCAAACATCATTGAATGTTAGACAGAGAGGCAAAAACTAATCAAAGTGTTTCTAATCCCTGAAAATAAGCCCACTTCTTCTATTTTCCTCATTTCAGTTTCTGGGTTTTAATCGATCTCCCCCTTTCTCACCCTTCCGTCTGAATTCCGGTCTGCAATCGTCGGAAAGTTTTGGACTTTACACCAACGCCAAAGCGAGTTCTTGTTTCTCTGTTTGCTTCTCTAGGACCAATCAGTTTCCATTTACAGATGCGTACTATTCACCTGTCAGAGCTCTGAGATTTGTCTTTTTGCATCTCTCTGAATATTTCTCTTTTCTCAGATCCATTGACCTCATCCACATACATAAAGTTTAGGTATTTTTAAAAGGGTTCAATTCTGGGGTTTACCGGAATTTCATCATCTTTGAAGACCATGAGAGGCGTCTTCATCGTCATCGTAACGTGTCTGGTTTTCTTACCGGATCCTCTACGTGCCGGTGTAGCGTCCATCGGGAGCATCACTCCAGGTTTTGGAGGATCTCAGATGAATTACATCAACAACGATGGTATCTTCCTCGAATCCAACAACTCAGCCTTCGGTTTCGGTTTCGTAACTACACAAGATTCCGTTACTCTGTTCACACTCAGTATCATCCACAAGAGCAGCACGAAACTGATCTGGTCCGCGAACAGAGCTTCCCCTGTTTCCAATTCCGACAAGTTTGTGTTCGATGACAACGGAAATGTGGTGATGGAAGGAACTGAGGTTTGGAGATTGGATAATTCAGGCAAAAACGCTTCAAGAATCGAGCTGCGTGACTCCGGGAATCTCGTTGTTGTTTCCGTTGACGGAACTTCGATCTGGGAGAGTTTTGATCATCCGACAGATACTCTGATCACGAATCAAGCTTTCAAAGAAGGCATGAAGCTCACTAGCAGTCCTTCTTCGAGCAACATGACTTATGCCCTTGAGATCAAATCAGGAGATATGGTTTTATCTGTTAACAGCTTAACCCCTCAAGTGTATTGGTCAATGGCAAATGCCAGAGAGAGGATCATCAACAAAGATGGCGGCGTAGTGACTTCATCGTCTCTCCTTGGGAATTCATGGCGGTTCTTTGATCAGAAACAGGTTTTGTTGTGGCAGTTTGTATTCTCAGACAATAAAGATGATAACACAACTTGGATCGCTGTTTTGGGAAACAACGGTGTGATCTCTTTTTCTAATCTTGGAAGCGGAGCATCTGCTGCCGATTCTTCGACTAAAATACCTAGCGATCTGTGCGGAACACCTGAGCCTTGCGGGCCTTACTATGTCTGCTCGGGTTCTAAAGTGTGTGGATGTGTGTCCGGGTTGTCTCGGGCTCGGTCTGATTGCAAAACCGGGATTACTTCTCCCTGTAAGAAAACCAAGGATAATGCAACATTGCCTTTGCAGCTAGTAAGTGCTGGAGACGGTGTAGACTATTTCGCTCTTGGGTATGCTCCTCCGTTCTCCAAGAAAACTGATCTTGATAGCTGTAAAGAGTTCTGCCACAACAATTGCTCGTGCCTTGGTCTTTTCTTCCAGAACAGTTCTGGTAATTGCTTCTTGTTTGATTATATTGGAAGCTTTAAAACCTCTGGCAATGGAGGCTCTGGGTTTGTGTCTTACATCAAGATCGCAAGTACTGGTTCTGGAGGTGGAGATAACGGAGAAGATGATGGGAAACATTTTCCTTATGTAGTGATTATTGTCGTGGTAACAGTTTTTATCATCGCTGTTTTGATCTTTGTGGCCTTCCGGATTCATAAGAGAAAGAAAATGATTTTGGAGGCTCCTCAAGAGAGTTCAGAAGAAGATAACTTCTTGGAGAACTTATCCGGGATGCCTATTCGGTTCGCTTACAAAGATCTTCAGTCAGCGACGAATAACTTCTCGGTGAAGTTAGGTCAAGGAGGGTTTGGATCGGTCTATGAAGGTACTTTACCAGATGGTTCTCGTCTAGCTGTGAAGAAACTTGAAGGAATCGGTCAAGGGAAGAAAGAATTCAGAGCCGAGGTTAGTATAATCGGAAGTATTCATCATCTGCACTTGGTGCGGCTAAGAGGATTCTGCGCAGAAGGGGCTCATAGGCTGCTCGCATACGAGTTCTTATCCAAAGGTTCGTTGGAGAGATGGATATTTAGGAAAAAGGATGGCGATGTTCTTCTAGATTGGGACACAAGATTTAACATAGCACTCGGAACAGCCAAAGGTTTAGCGTATCTACATGAAGATTGTGATGCAAGGATTGTTCACTGCGATATAAAACCCGAGAACATCCTATTAGACGATAACTTCAATGCCAAGGTATCCGATTTCGGACTGGCGAAGCTCATGACCCGCGAACAAAGCCATGTCTTCACAACAATGCGCGGGACAAGAGGCTACTTGGCTCCAGAATGGATCACAAACTATGCGATATCAGAGAAGAGTGATGTTTACAGCTACGGAATGGTGTTGCTAGAGTTAATAGGAGGAAGAAAGAACTATGATCCATCAGAAACTTCGGAGAAATGCCATTTTCCTTCTTTTGCTTTCAAGAAGATGGAAGAAGGGAAGCTTATGGATATTGTCGATGGGAAGATGAAGAATGTTGATGTGACTGACGAAAGGGTTCAAAGGGCTATGAAAACCGCACTTTGGTGTATACAAGAAGATATGCAAACGAGACCCTCGATGAGCAAAGTTGTTCAAATGCTTGAAGGTGTTTTTCCGGTGGTCCAGCCACCTAGTTCTTCCACTATGGGATCGAGACTTTACTCAAGCTTCTTTAAGTCCATCAGCGAGGACGGCGGTGCTACTACGTCATCTGGACCGTCCGATTGTAACAGTGAGAATTATCTCTCCGCCGTGAGACTCTCCGGTCCGAGATAGCAATCTTTTTAGCCAATTTTTAGTATCTTATATAATAGGTTTTTGGCTCACCATGTTTTGTTGTATATTGTTTTTGTGTTACATCTTAAAAGAATAGCCATCACTCAGTTTTGTAACGTTCCGAGATCAATTATTTCATAGATTACCCGTCGTTTTTCTT
>AT4G11900
TCTTTCTGTCTTTTATTTTCAAAACAAACATGCAGATTTGCAAGAAGAATGTGTTTTTATTATACTACGGAGTGTTGGTGTTCTTGTCTTTTCAAGTTTCTTCTTCAACTGACACTATTTCTACCAATCAACCTCTTTCAGGATTTGAGACCATTGTTTCCAGCGGTGATATATTCGAACTCGGTCTCTTCACCCCAACTCCAGATACTTATGATCATAGAAACTACTACATAGGAATGTGGTACAGGCACGTCTCTCCACAGACTATTGTTTGGGTCGCAAACCGAGAATCTCCTCTTGGAGGGGATGCTTCTACTTACTTATTAAAGATCTTAGATGGAAACTTAATTCTCCATGATAATATCAGCGCCACCCGTAAATCTCATACGGAGGGGACATCTCGGAGATCCCCTCAAAAGATCTCAGAAGGAAACTTACTTTTCCATGAAACAGTTTGGTCGACCGGTGTTAACTCTAGTATGAGCAAGGATGTTCAAGCTGTTCTGTTTGATAGTGGTAATCTAGTATTGAGAGATGGGCCTAATTCTTCTGCAGCTGTGTTGTGGCAGAGTTTTGATCATCCCTCGGATACTTGGCTTCCTGGCGGTAAAATCAGATTAGGAAGCCAACTTTTCACTTCTTGGGAGAGCTTGATAGATCCATCACCGGGTCGATACTCTCTCGAGTTTGACCCTAAACTACACTCACTCGTCACGGTTTGGAATAGATCAAAGTCATATTGGTCCAGTGGGCCATTGTATGATTGGCTTCAAAGTTTCAAGGGATTTCCAGAATTGCAAGGTACTAAGTTGAGTTTCACATTGAATATGGATGAGTCTTACATCACCTTTTCAGTAGATCCCCAGAGCAGATATCGTTTGGTCATGGGTGTTTCGGGGCAGTTCATGCTGCAAGTTTGGCACGTTGACTTACAGTCGTGGCGTGTGATATTGTCTCAACCTGATAATAGATGTGACGTTTATAACAGTTGTGGATCATTTGGGATTTGCAATGAAAACCGAGAGCCTCCCCCATGTAGATGTGTTCCTGGTTTCAAACGAGAATTTTCCCAAGGATCTGATGACTCGAATGATTACTCTGGTGGTTGTAAAAGGGAAACATACCTTCATTGTTATAAGCGAAATGACGAGTTTCTTCCTATTGAAAACATGAAATTAGCCACTGATCCAACAACAGCATCGGTCTTGACATCCGGGACTTTTAGGACGTGTGCCTCACGTTGCGTAGCTGATTGTTCTTGCCAAGCGTACGCAAATGATGGAAACAAGTGTTTGGTGTGGACAAAAGATGCTTTCAATCTGCAACAACTCGATGCAAATAAGGGACACACATTCTTTCTTAGACTTGCATCTTCAAACATCTCAACTGCAAACAACCGTGAGTATTTTCACTAACAAATAAACGAATGCGTTGAGATATCTCTAAACTCATTTTTCTACTCAGGAAAAACAGAACATTCTAAAGGCAAAAGCATTGTGTTACCACTTGTACTAGCATCACTTGTAGCAACTGCTGCATGTTTCGTTGGTTTGTATTGTTGCATTTCTTCAAGAATAAGAAGAAAAAAGAAACAAAGAGGTGAGATCGGTTTTAGCTTTTTGCATAATCACTATACAAGATTTCTCACTAGTTTCTGAAACACGAATTATACGCAGACGAAAAACATAGCAGAGAGCTATTAGAAGGTGGCCTAATTGATGATGCTGGAGAAAATATGTGTTACCTAAATCTACATGACATAATGGTTGCAACAAATTCTTTCTCTAGGAAAAAAAAGTTAGGAGAAGGTGGTTTTGGTCCAGTCTACAAGGTATTAATTAAACAATACAATTAATACTGAGCTTGTAAGTTTGTTTGGCTAAAGGTTTAAACAAAGTAGCTAGTTTGAATATCATCATCGTTACAATCTTACTATAGAAACTTTGATGGGCAGGGAAAGCTACCAAATGGGATGGAAGTGGCAATCAAAAGGCTTTCAAAAAAATCAAGTCAAGGTCTGACAGAGTTCAAGAATGAAGTTGTTCTGATCATAAAGCTTCAACACAAGAACTTGGTGAGGCTTTTAGGGTATTGTGTTGAAGGCGATGAGAAGCTCCTAATTTATGAGTACATGTCGAATAAGAGCCTTGATGGTTTACTCTTTGGTGAGTGGTGAATATAACTATCCAAAACTACTACATTTGAATTTGAAATATAAATAATTGACTTCTTAACGTTCTGTTTTTGGGCACACATATATATATATCTATATAGATTCTTTAAAGTCTAGGGAATTGGATTGGGAGACACGTATGAAAATAGTAAATGGGACGACAAGAGGACTTCAATATCTGCATGAGTACTCACGTCTCAGGATCATTCACCGAGATCTTAAGGCAAGCAATATTCTACTTGACGATGAGATGAATCCTAAGATCTCAGATTTTGGAACCGCAAGGATTTTTGGTTGCAAGCAAATCGATGATAGCACCCAAAGAATCGTCGGGACATTGTAAGTGTACATCTCGTATAGTTAGTTATGTATCCACTTGTTTCAAACACTAAAATGTTGAGTTTAAGTTTATGTTTCTCAGTATTATAACACACATACTTTTTTTTTCATTCCTAGTGTCTTTGCAACTTATTTATGAATGATGTTTGAAAAAACTAAAACATTGTGCTGAGGTAAGTACATAATTTTTACATGTCAATGCAAAGGAAAAAACAATCACTACCTATATGTATTTACATTAGAATCTTTGGATTAAATTTCATAAGCGGTTAATTTCAGCGGCTATATGTCACCGGAATATGCATTAGGTGGAGTGATTTCAGAGAAATCGGATATATACAGCTTTGGAGTGTTGTTATTGGAGATCATATCGGGTAAAAAGGCGACAAGGTTTGTTCATAACGACCAAAAACACAGCCTTATTGCTTATGTAAGTGTTTCTATAGTTCAATATCATTTATCTACCATATATAAAAACGTAACTTACCTTAGATCAATCCCAAACTATATGTTGTTGATCATCTTCAGGAATGGGAATCTTGGTGTGAAACAAAAGGTGTAAGCATTATAGATGAACCAATGTGTTGTTCGTATTCTTTAGAAGAAGCGATGCGGTGCATTCATATCGCACTTCTTTGTGTTCAAGATCATCCTAAAGATAGACCCATGATTTCACAAATCGTTTATATGTTGAGCAACGATAACACTCTTCCGATTCCGAAACAACCAACTTTCTCAAACGTGTTGAACGGGGATCAACAGCTAGACTACGTATTCTCCATAAACGAAGCAACGCAAACAGAACTGGAAGCGCGATGA
>AT2G19130
GCCATTAACAAACCAAACCTCACGGAGTCTTCTCCTTTTTAAAAGAAGAGTCTCTCTTCATAATCATATGATCTCTCTCTCTTTCCAGTTTCCTCTAAGCTTTTCTCATGGTTTCGTTCTTGACCCTCACTTCCTTCTTTTTCATCTGCTTCTTCATCCATGGCTCTTCCGCCGTCGACACAATCTCCGGCGACTTTACTCTCTCCGGCGACCAGACTATTGTCTCCTCCGACGGAACTTACGAAATGGGTTTCTTTAAACCAGGTTCTTCTTCAAACTTCTACATAGGTATGTGGTATAAGCAACTCTCTCAAACCATACTATGGGTAGCCAATCGAGACAAAGCAGTTTCCGACAAAAACTCATCAGTTTTCAAAATCTCCAACGGAAACTTAATCCTACTCGACGGTAATTACCAGACTCCGGTTTGGTCCACCGGTCTCAACTCCACTTCCTCTGTTTCTGCTCTTGAAGCGGTTTTGCAAGACGACGGCAATCTTGTTCTCAGAACCGGCGGCTCTAGCTTATCAGCTAACGTATTGTGGCAAAGCTTTGATCACCCGGGAGACACGTGGCTTCCCGGAGTGAAGATCCGGTTAGATAAACGAACCGGAAAGAGCCAGCGACTCACTTCGTGGAAGAGTCTCGAAGATCCATCACCAGGTTTGTTCTCTCTCGAGCTAGACGAATCCACAGCTTACAAAATTCTCTGGAACGGATCTAATGAGTACTGGTCAAGTGGTCCTTGGAACCCTCAGAGCAGGATCTTTGATTCGGTTCCCGAGATGAGACTCAATTACATCTACAACTTCAGCTTTTTCTCTAACACCACAGACTCATACTTCACGTACTCTATCTATAACCAGTTGAACGTGTCACGCTTCGTCATGGACGTGTCTGGACAGATCAAACAGTTCACTTGGTTAGAAGGAAACAAGGCATGGAACTTGTTCTGGTCTCAACCTCGACAACAATGTCAGGTCTATAGGTATTGTGGCTCCTTTGGAATTTGCAGTGACAAGTCTGAGCCTTTTTGCCGTTGCCCACAAGGGTTTAGGCCTATGTCGCAGAAAGACTGGGACTTGAAGGATTACTCTGCAGGCTGCGTTAGAAAGACTGAACTACAATGCTCTCGTGGAGACATTAACCAGTTTTTTCGTCTTCCGAACATGAAACTAGCTGATAATTCAGAGGTATTGACAAGAACTAGTCTTAGTATTTGTGCCTCTGCTTGCCAAGGAGATTGTTCTTGTAAGGCTTATGCATATGATGAAGGCTCGAGCAAATGCTTGGTTTGGTCTAAAGATGTCTTGAATCTACAGCAACTTGAAGATGAAAACAGTGAGGGGAACATATTTTATCTTAGACTCGCTGCTTCTGACGTTCCTAATGTTGGTGCTTCGGGTAAGAGTAACAATAAAGGTTTGATATTTGGGGCGGTTCTAGGCTCGTTAGGAGTAATAGTCCTTGTTCTGTTGGTGGTAATCTTGATCTTAAGGTACAGGAGGAGGAAGAGAATGAGAGGAGAGAAGGGTGATGGTACATTGAGTGCGTTTAGCTATAGAGAATTACAGAATGCGACAAAGAATTTCTCGGATAAGTTAGGAGGAGGAGGTTTTGGTTCAGTGTTCAAAGGTGCTTTACCGGATTCTAGTGATATAGCGGTGAAGAGGCTTGAGGGTATTAGCCAAGGGGAGAAGCAGTTTAGGACGGAAGTAGTGACGATAGGAACGATCCAACACGTTAATCTAGTGAGGCTTCGCGGGTTTTGCTCCGAAGGAAGCAAGAAATTGTTGGTTTATGATTACATGCCTAATGGTTCTTTGGATTCTCATCTTTTCTTAAACCAAGTTGAAGAAAAGATCGTCCTCGGGTGGAAACTGCGGTTCCAAATCGCGTTAGGGACAGCTAGAGGATTAGCTTATCTACACGATGAATGTAGAGACTGTATCATTCACTGCGATATAAAACCCGAAAACATTTTGTTAGATTCACAGTTTTGTCCCAAAGTTGCTGATTTCGGTTTGGCCAAGCTCGTGGGTCGAGATTTTAGTAGGGTTTTGACGACAATGAGAGGCACAAGAGGGTATCTTGCACCGGAATGGATATCGGGAGTTGCGATAACAGCGAAAGCCGATGTTTACAGCTACGGGATGATGTTATTTGAGCTTGTTTCCGGGAGGAGAAACACAGAGCAATCAGAGAACGAGAAAGTCAGATTCTTTCCAAGTTGGGCCGCGACCATACTCACCAAAGATGGAGACATTCGCTCACTGGTTGACCCTAGACTAGAGGGAGATGCAGTGGACATAGAGGAGGTCACGAGAGCTTGTAAAGTGGCGTGTTGGTGCATACAAGACGAAGAGAGTCATAGGCCAGCGATGAGTCAAGTTGTTCAGATTCTTGAAGGTGTCTTGGAAGTGAATCCACCGCCTTTTCCAAGATCAATTCAAGCTTTAGTCGTTTCCGATGAAGACGTGGTCTTCTTTACTGAGTCGTCATCTTCGTCAAGCCATAATTCTTCACAGAATCACAAGCATTCTTCTTCTTCTTCTTCTTCCAAGAAAATGACCAACGATAACTCTTCTGCTTAG
>HvleckRLK1
CAACTCAGAGGCCCATTCACATATCCTGGCGGAAGGTTTCAAGAGGAAGGCTCGTCGGAGAGGACCGCCGTTCCCCGACGGCAACCGGGGGCGGCGTCGTCCGGTCCGGGAAGCTGGTCCCGGGCAACATGCGGTCGAGGAGCTTGGCATGCCCGAGCGGCTCACGGTGGAGCTTCGAGAGGGATTCGAGCAGCTGTACGAGGGCGCGGCGCGAAGATGGAGGCCGGCCTGCAGTCTGCAGATCCGGGAGGATTGGGAGGAGGAGGAGTTCCGGAGGGAGAAGAAGAGGCCCTTTGTCACCATGGGCATCACGCTCTCGGCGGGCGCGGCAATCCTCGTCACCGGTCTCCGGTCTCCAGGTCGCGTGCTGCGAGTCTGCCGCCGGTGTTCTACGTTCAGGTACTTAATTAGGCCTGACTCTGTCCGTGCTCTATCTGAATGCATATATGATGTGAACCTAATGTTATCACACTAATCAAATTATTCAATTAGATGGATGACGCAATAAGGTAATCCGGCCATTAATTCTGGTAAAGCACCCCTTCTATTTTATTTTATCATCTGCTGAAATGAAACTGCAAGCAACTGTGGCGTGGCAAACTCAGGGCTTGGATTGGTTTCTTGTGGATTCAAGGCGACGACGGGTAGATCATGCTCGTTGTGGTGGCGATGCGTTGGATCAACTCTGCACCGTGAGGGTCATGTCAGCGGCAGGTTAGTGATCACGTTGCTAGCTACTTTCAGGTTTTTATGGCATCAAACTCTTACTACTGATCGACGAATGATATTGACATGCTGACTGCGAGCCAATTGTTTTACATTCTTCTCTTTAGCTGTTTTTACCTTTTAGGACTTTATATCGAGTAGGGTCTCAGTGAACATTAGATGTCTACATACATAATACTCCGTATATGGCTAGTGCTCATATCAGCAATCTGTCGATGCATCTTTCTGAACTCTCAAGTGCTAAATTTAGTTCCACGCATTGCTGCTGCTGCTCTGTAGAACCGTTGTAATAAAAATAATTAGGCAATTAACTTCCAGCCTTTACAGTAGGCTCTACAACGATGCCTACATTTTATAATTTGTTGATTTGACAAGCCCATATTGTTATATACCCATTTCGAGAACTGAAGTTTGAAACAAGGATGTCACTGAAGTATCAAACTATCATACGGATATCAGTATTATGTAAGTTGCTGAAGTTGGGATCTTTGGCTATCCTCACCCTCTACCGTGTCGCCCCCGCGGGCGACCGGTCGCGCCTGGGCCTTCCTCCTCCAACATATAGGAAGACGGTAGCGACGGCGGCCCCTGCCCATTCCCCTCTCGGTTGTTTTCCGGCATGGGGGTGGAGCGGCGTCGGGGGGGGGNCTGAGCGGGCCAACAATGGGGCGGGTCGGCAGCGTGGCTTTCGGGAGACGGGGGAGCGGCGACGGGCTGCGGGGAGCTGGCGGCGCTGGCGCCACCCTGTTGCAGCGTGGCCGGCGAGGTTTAGCGGGCCCGATTCAGGCCAGGGGTGGCCTTGTTTGCCCTGCTACTGCGTCCGGTCAGCGACCGCGACGGTGCCGGAGGCAGGGGTCTTCCACACAATGGCGGTGGAGGTGGTTCCCTTCCGTGTGGCTACTGTGCTGCTGCTCCCGTCGCCAAGCCCTCCTCTCTTCGACCTCTTGGCCTCGTGGTGGTGATCTTAGTGAGGCAGTGTGGGTGGCGTCGCGACCGCAGTGGCGCATGCTAGTGGGCGATGGGTTGGCTGGTTGGCTCCGGTCCGGTTGGGCGGCGGGGTTTGGAGTGCGGGAGAAATCCTTACTGGTTCTTCCGGCTCCGATGCGATGACGTCTGCGGGTGCCACCATTCCTTCCTGAAGGGTGTCGGTGGTCTCCATCCCCCACTCTCCTCCGCGTACCGGGGGAAACCGTAGGACATGTCCGGGCAGCAGCGTCATCGCATTCCTTGTTGGAGGTGCTGCTTGGTACGCGGAGGATCGGAGCCTTGAATCGTGGTGGGTCGATTCCGGAGGGCGCAGCGGTTTCGGTTCATCCGCGCTTTGTCGAGCTGCCGGTGTTGGCATTGTTTCTTTCTCTTTTGTTTCTTTTGGCTTGTTGTGCTGCTCGCCTCAACGTTTGTTGTGTAATCGGTGTTGGTTGTCTTGTAATACAAAGTGGGGGAAATCCTTTTTCGGTAAAGTTAGGATCTTTCTTTGGTTGTTCTTGGTAGGTTGTTGGCGACTAAGATCAATTGCCTTCAGATGTTGTTATTTCCAGGGAAGGCACATGGAAGATTTTGGGTGGGAGGGAATAATCTTGTCCTTCAGAAGGTGGAATGGATTTTATGATTGGTATGACTGTTCTTAAGCACTGGGCCTCTTAAGACACTCCCAACCCTTTTGACTTCAGAATAACAACATATAGGAGTAAGGATCGGGTCTGATGCTCGTAATGGCCCTGGCCCATGTCAAGCACAAGATGTCACCCATACCCGTTGCTAGAGGGCATGCCCACAACAGAAGCATGGTAAGTTGGTAACACTTCGCACGACACCTTAGCAACAAAAGGAACAACTGCAATTTCCATTCCAATCAAGCAAAATTGAGAAAAATCCCAGCGCTAATCAAGATTCAAGAATAGCCGCATGCCCACGTAGTCAAACTTTAAAGAGATAAACTGACATACAAGTATAAATATATAATGCAAAAAAAAAAATGGGAATTGTTCCTGGGGGCCAAATGGCCCCGCCAATTTAGGGGAGCTAACTGGTCACCCATACCTATTTATCCGTGCATAAGATGGCACAAACATGGGTTAATGGACCAGATTTCCATCCAATTAGTGTGCCTGAATGCCGGGAATAGTCTGCTGAAGTTGTCATGGTGGTTCACCGAAACCTTGTTCACTCACTCGCTGGGGATGGTGATTGGTGCAGCGACAGTCCTCACAAACACAGAGAACCTTGCTGTCGGGTGCCAAATGACACCACGTTGTTAAAAAAACTGTAACCACCTGACCGACACATTCATCCCCACCATAAAGCTCCAGATCGGTGTTGTCATGTGTGGCGGTGCCTTCCTCGTTCACTGGTTCCCTTCTTCTCCTCTCAGATGGAACGAACATAACATATTTCCTTATGTGAGTGTCGAAGTTGGCTCACAAACTGTAAATTCTCGGTCAACTGTCACTAGCCCTTAAATCAAAATTCTAATTATTATCTTGCAATTGTACAAATCATACTGAGTTTTTTCGAAGTCATGTCGTACGCCACGCCGTGGTTTGACCAGCTGAGTTCACACCGAAACAGCTGAAATGTCAACTCCAAGACACTCTCAACTCGAACCATAATTCAAAGCTTTGCATTTTTCAGTCACCCCTTTCATTATCAACCTGACGTGAGTGCTGGATCCGGTCACCAAATTGTCAAGAAATTAACACTAATCCTTTGTTGCTTGTAAAGACCAAGCATATATTGATCCAGACTTTGCACCTTAACTAACAGCATGTTAGCATCAGCAACAGAAGTCCTGAACAAGGTACATTAGTACATTCGTTGCCAGAGCACGTATGTACTGCAGAATATTTCAGCCTGATCGATCATGGATGGGCCGGCTCTCAGCTGCTACACTGCGGCCCTGATCATTCTCTTCCTGCCGTTGCGGGCGTCGGAGGACCGGCTACTCGCTGGCGAGAGGCTCTCCCCCGGCACCACCATCGTCTCCGACAACGGTGCCTTTGCCTTGGGCTTCTTCAACCCCTCCAATTCAACTCCGGCTAGCCTTTACCTGGGCGTATGGTACAACGGCATACCAGAGCTCACTGTTGTGTGGGTCGCCAACAGGGAGGCGCCGGTGATCAACGGCAATTCCTCTGTGCCGACGCTCTCCCTCACCAACACCTCCAACCTCGTTCTCTCCGACGGTAGCAGCGGCCTTGTCGTTTGGACGAGTGATGTAGCCGCTGCTCCGAGCTCCGTTGCAGCAGTGGCGGTGCTTGAGAACACAGGCAATCTCGTCGTCCGGTCGCCGAATGGAACCACGTTGTGGCAGAGCTTTGAACACGTCACGGACACTTTCCTCCCCGAAATGAAGATCCGGATCAGGTATGCCACGCGCGGCACCGGTATCCGCTTGGTGTCCTGGAAGGGGCCCAGCGACCCATCGCCCGGGCGATTTTCCTACGGAGGAGACCCGGACACGCTCCTCCAGATATTCCTCTGGGATGGGGAACTCCCGCTGGTCCGGAGTGGCCCATGGACGGGGTACCTAGTGAAAGGCGAGCACCAATACCAGCAGGCTAATGGCAGCGGGTCCATCATCATCTACCTAGCCATTGTCGACAATGACGAGGAGATCTACATGACCTACACCGTCTCTGCGGGCGCTCCACTCACCAGGTATGTGGTGACCTACTTCGGAGATTACGAACTCCAGAGTTGGAACAGCAACTCTTCGACATGGTCTATCCTCTTCAAGTTGCCACCCTATGAATGCAACCGATATGGTTCCTGTGGTCCGTTTGGCTATTGCGACGAGACGGTGAGGCCCGTACCCATGTGCAAGTGCCTCGACGGCTTCGAACCAACAAGCGCAAATGAGTGGAGGTTCGGTAGGTACTCGGCAGGGTGTCGACGAAAGGAGGCATTGCACGGATGCGGTGACGGCTTCTTGGCCTTGACGGAGATGAGGGTGCCAGACAAGTTCACGTTTGCTGGTGGGAACAAGAGCAAAATGGAGGAGTGTGCGGCGGAGTGCAGCAACAATTGCTCCTGTGTGGCGTACGCATTCACCAACCTAAGCAGTGGCAGGTCTGGAGGAGATGTGACAAAGTGCTTAGTATGGGCGGGGGAGTTGATTGACACTGGGAAGTTGGGCCAAGGGATTGGCAGCACCACGCTATATCTCAGGCTTGCAGGCTTAGATGTAGCAGCTGGTACCAAATTTCTCTCTCTTTCTTGTTGTCTTTACTAACACACTTTCATGATTACATAAGCCATTTGGATTTTTAATAATATGTGTGCAATTCGCAGGTAAAAGTAGAAAGAGTACTGCAACGATGATTATACTGGCAATTTTTGGAACTGGAGTTGTGGCATTCCTATGCATTTTCGTGGCATGGCTAAAATTCAAAGGTACATTTGAAACATTATGTGGCTGCCATTTCGTAGGTCTACCATCTTCCATGGTGTAAAAATAATTGATTGCTCACTCCATTCGAATATTATAATCCTACGTTTGTGGTAAGTCAAACGTGTTCAATTTTCACTAAGTTTATAGGAAATATAGTAACATGTATTCTCTTCGTCCCAAAATAAGTGTCGCAAGGGAGGGTGCCGGGGGGTTGGGGGGGGGGGGGGGGGTGTAGAACACCAATAAGCCTCGTGAGATGCTTATTAAATATATTTTTATACTATGTGTATTTGGTATTGTAGATGGTAGGACATTTTTATAAAATTGGTTAAACCTAAACAAGTTTGGCTCACCTATTTTCGAAAGTATTCTATTGTGTGATATGATATTTTTTACCATTGAAAATAAGAAATACTACATTACTATTATTAGAAACTCTCTCAAAGGTCGGCTGTTAGAACTTAGTCTTTATCGGACAAACCTGCCATTCCTTGAAAGGACATACCATGATCCATGAACACTTCCATGCTTCAGTGAAGACTGTTCCAGCAGTAAAATATAACATTTCCTTTTTATGTCAATCATACAAGAAATAATTATAACATTTTGCAAGCAGGCAAGAAAAAATGGAGAAAACACAAGAAGGCAACATTTGATGGTATGAATACCTCTTATGAACTTGGGGAAGGAAACCCTCCACATGCCCATGAATTTCCATTTGTAAGTTTTGAGGAAATTTCTCTAGCAACGAACAATTTCTCTGAGACATGTAAGATTGGACAGGGGGGATTTGGAAAAGTCTACAAGGTAACTTGATCATTTGGTGAATTGCCACAGTTCATTCTAAAATCAGTAAAATTGAATTGTTCATATGAACATGGTCTAAGTTTCCCCTTGAACTCTTTAGGGATTATTAGGTGGCCAAGAAGTTGCTATCAAGAGGCTAAGTAGTGACTCGCAGCAAGGAACAAAGGAATTCCGGAATGAAGTAATTCTAATTGCCAAATTACAACACAGAAACTTGGTTCGGCTTCTTGGATGTTGTGGGGAGGGAGATGAAAAGTTGTTGATCTATGAGTATCTTCCGAACAAAAGCTTAGATGCAACCCTTTTTGGTATGTATTCTAGTCACAGCCCAAAATTTCCCTAACCAACCAAAACAAATTAGTTACATTTGTTTTGTTGTACAGATGATTCACGAAGATTGATGTTGGATTGGACAACACGGTTTAATATAATCAAAGGGGTTGCAAGGGGACTTCTGTACCTCCACCAAGATTCAAGACTAACTATAATTCATAGGGATCTCAAAGCTGGAAATGTTTTGCTAGATGTGGAGATGAAACCCAAGATAGCAGACTTCGGTATGGCGAGGATCTTTGGTGATAACCAACAAAATGCCAACACCCAACGTGTTGTGGGAACATAGTGAGTAACCTTTTCATCTTATAGACCAGTTAAACTTGCAATCAAGTTCTACTCATGTGAATGCTATGGTCGTGCAGTGGATACATGGCCCCAGAGTATGCAATGGAAGGTGTCTTCTCTACCAAGTCCGACGTCTACAGCTTTGGTGTGCTAGTACTTGAGGTCGTGACTGGTATAAAAAGAAGCTCCAATAGTCAGATCATGGGCTTCCCCAGCCTCATTGTGTATGTAAGTGCCAACAAGGGTTCTATGAAGTTCAAATTTTAAAATAGATCAAGTTTTATAAGATTTTGTTGATACTTTTCCTTTTTTCAGTCATGGAATATGTGGAAGGAAGGAAAGACAGAGGAATTGGTGGACTCATATACCACGGATACTTGTTCACTGGATGAAATTTTGATTTGCATCCATGTAGCACTCCTGTGTGTCCAGGACAATCCAGATGACAGGCCACTCATGTCATCCGTTGTGTTCATCCTAGAAAACGGAAGCACCACACTTCCACCCCCCACTTGCCCTGCCTACTTTACACGACGAAGTGCAGAAATGGAGCAAATGAGAGATGATATCCAGAACTCCAGGACCAGTTTTACTCTCACCGAGATTGATGGGAGATGAAATAACTATAATTTTGTTTAGACATATCGCAGAACCATTCCTATTGAAACATCTTCCAATTGTATTCCTAATGGTGACCCTTCAGTTGTTTGGAAGTCATCGTCTTCCAATTCTTGTATTCCATTTTGCTGACCTTGTTGATGTGGAAAGAAAATAAAAATACTAACACATAATATCATGAATTTTCAAACTGACAACATAACATCAAGATGTCTCTATAGATTAATTAGGTAGGGAGTTGCTTTCCCTCTTAATTATTAGAACGTATATATGTATTTACCTTGAAGAGAGAAACTATATATATATATGTACCTAACTAGCCATTGTTTGGATGTAGTGAAGTGATTTTACTTCCAGCTCAACAAGAATCAAACCTACGGTGTGACACCCCATATGTCTTATTAATGTAGATGACCGTAATACATCTTTGGTGACTTTGTGAACATTCAATTTTCGTGACTCTAGCTAA
>HvleckRLK2
NNNNNNNNNNNNNNNNNNNNNNNNNNNNNNNNNNNNNNNNNNNNNNNNNNNNNNNNNNNNNNNNNNNNNNNNNNNNNNNNNNNNNNNNNNNNNNNNNNNNNNNNNNNNNNNNNNNNNNNNNNNNNNNNNNNNNNNNNNNNNNNNNNNNNNNNNNNNNNNNNNNNNNNNNNNNNNNNNNNNNNNNNNNNNNNNNNNNNNNNNNNNNNNNNNNNNNNNNNNNNNNNNNNNNNNNNNNNNNNNNNNNNNNNNNNNNNNNNNNNNNNNNNNNNNNNNNNNNNNNNNNNNNNNNNNNNNNNNNNNNNNNNNNNNNNNCCGCCGGCGCCCCCACGCTCGCGCTGGCCAACGACTCCAGCCTCGTCATGTCCGACGCCGACGGCCGCGTGCTCTGGAACACGACCGGCGTCGGCAGCTCGTCCTCGCAGACGGCGCCAGCCGAGCTCGGGAACGACGGCAACCTGCTCATCCAGCTCCCGGACGGCACGGTTGGGTGGCAGAGCTTCGACCACCCGACGGACACGTTCCTGCCGGGGATGAAGGTGCGGGTCAGCCACCGGACCGGGAAGGGCGACCGGATCGTGTCCTGGAGATCCCCCGATGACCCGGCGCCGGGGCGCTTCTCCTACGGCCTGGACCCCGGCACGTCGCTGCAGCTGCTCATGTGGAACGGCACGCGCCCCTACTGGCGCAGCCCCGTCTGGAAGGGGTACGCCGTCGCCACCATGTACGTCAGCGCCGGCACGGTGATCTACACGGCGATAGTCGACACGGACGAGGAGATCTCCTTGGCCTTCTCCGTCTCCGGCGGCGCCGCGCCCACGCGGTACGTGGTGACCAGCTCCGGCAAGTTCCAGCTGCTCATCTGGAACGGCACCAGGTCGGCCTGGGCCACGCTCCAGTCGTGGCCCTCCAGCGAATGCACCACGTACAGGCACTGCGGCGCGTACGCCTACTGCGACACCACGGCGGCGCCGGCGACGTGCAGGTGCCTCGACGGCTTCGAGCCTGCTAAACCGGCAGAGTGGACCTCCGGCAGGTTCGGGCAGGGTTGCCGACGGAAGGAGGCGCTGCCGCCGTGCGGCGGCGGAGGCGGCGGCAATGGGGTGGGTTTCATAGCCATGCCCAGCATGAAGGTGCCGGACAAGTTCTCGCTGGACGCTGGCAACCGGAGCGCGGAGGAGTGCGCGGCGAGGTGCGCCGGCAACTGCTCGTGCGTGGCGTACGCGTACGCCAACCTGCAGAGCAGCAGCGCCAAGGGGGACGTGAGCCGGTGCATCGTGTGGGCAGGGGAGCTCGTGGACGCGCAGATGATCGACCCGCGCTGGGGCGGCGAGACCCTCTACCTCCGCGTGCCCGCCGCTGCCGCTTCCACTTCCCCAGGTACGGCAGAAATATATTCCTTTTGCCAAACTTTGTCTGAATTCTCTTGAAGAATTCAAAAAAAAACATGCTCTCTGCCGAATTCGAATTCAGTTTCATCAAACGTTTACCATATATTTGCATGTTCAGGTGGAAAGGCCAGCAGAAATGCAGTGAAAATAGCAGTGCCGGTGGTAGCATCTGCCCTGCTGCTCACATGCATTTTCTTTGTATGGTTCTGCAGATACAGAGGTACCGTTGCATTTTATGCTTACCTCTAGCCAAAACATGCCATGCCCAACCATTTCGTTTCGTTCTTAGACAAGACGCTCATCACTCATCACAACAATTGAAAATTGATACAGACAAGAGAAGGAAAACCGAGAGCCAGAAGAAGCTAATGCCCGGGATCAGGACCGGGACCACAAACACGTCGAGCGAGATCGGAGAAGGAGATCGCACCGGAGACCTTGAGTTCCCCTCCATAGGATTCGGCGACATCGTCGCCGCCACGGACAACTTCTCCAAGACACTCATGATCGGCCGCGGAGGCTTCGGCAAGGTCTACAAGGTACTAGCTCCATTCACTTTGTCTAGCTAGAAAAGTTCGGTCGTTGCGACCAACAATTTAAACCCCTAGAACAGAGTCATGATCTCACACATTCCACTTGTTTGTGTTTGTCATTCCGAAGGGAACATTAGACGGTGGTCATGTGGTAGCAGTGAAGAGGCTGAGCAAGGATTCGGATCAGGGAGCAGAGGAGTTCAAGAACGAGGCGATCCTGATCGCCAAGCTGCAGCACCGGAACCTGGTGCGCCTCCTCGGCTGCTGCACCGAGGGGGGCGAGAAGCTGCTCATCTACGAGTACCTGCCCAACAAGGGCCTCGACGCCATCCTCTTCGGTACATACTATGTTCAGCGAACTCAAATATACAACTGAAGGTTTCTTGCCATGGTTTCTGAAGTTCAGATGTTGCAGACAGTGGGAGGAAGTCGGTGTTGGACTGGCCGACGCGGCTGGGGATCATCAAGGGGGTGGCCAGGGGGCTGCTCTACCTCCACCAGGACTCCAGGCTGACTGTGATACACAGGGACCTCAAGGCCAGCAACGTGCTGCTGGACGCCGAGATGCGGCCCAAGATCGCCGACTTTGGCATGGCCAAGATCTTTGGTGACAACCAGGTGAAAGCCAACACCCGGAAAGTCGTCGGAACATAGTGAGTAGCCTGACCACCTGACTGAATTTTCTGAAAGAAACGAAAAAATATATTTTTGTTCTGAGTTGGTAGTTAGCATTTGATCGAAAAATACCCTAGCAAAATGTGATACCTCTTCTGACGAAAAAGTATAATGTGTGAACAGTGGCTACATTGCTCCCGAGTACTCGACGGAGGGCGTCTTCTCAGACAAGTCCGACGTGTACAGCTTCGGCGTGCTGCTCCTGGAGATCGTGAGCGGTATCAGGGTAAGCGCGACCGAGGGCATCATGGAGTTTCCAAGCCTGATATCCTATGTAAGGACCTCAACAAAAACTAACAGCTCCATCTTGCAGTTAACTTCCATTTTCAGATACACTCAATGTCAACAAAAGAACATGCACAAATGGTTGATTTTTTGTGTGTGTTTCGTGTAGGCATGGCACCTGTGGAGAGAAGGGAAGGCAGGCAAGCTGGTGGATCCATCCATGGCAGGGAGCTGTTCACAGGATGAGGCTTCGCTGTGCATCCACGTCGGGCTCCTGTGCGTCGAGGACGACCCGAGCAGGAGGCCGCTCATGTCCTCCGTTGTGTCCATCTTGGAGAACGGGAGTGCGTCGGCGTTGTCCCTGCCGACGCCGGTGCAGCCTGCTTTTGTCGAAATGATGGGAGAGAAGAGCCAGAGAAGCGACCTCGAGAACACCAGGAACACAATGGCCATGACCGTTCTGCAAGGTCGGTAG
>HvleckRLK3
[truncated: 528,584 more chars]
